# Supplementary material for: The development and validation of an easy to use automatic QT-interval algorithm
Source: PubMed Central journal article supplement (PMC5581168; doi:10.1371/journal.pone.0184352), 2017-09-01

Patient 1

Low RR, Complex #: 239

Mid RR, Complex #: 54

High RR, Complex #: 80

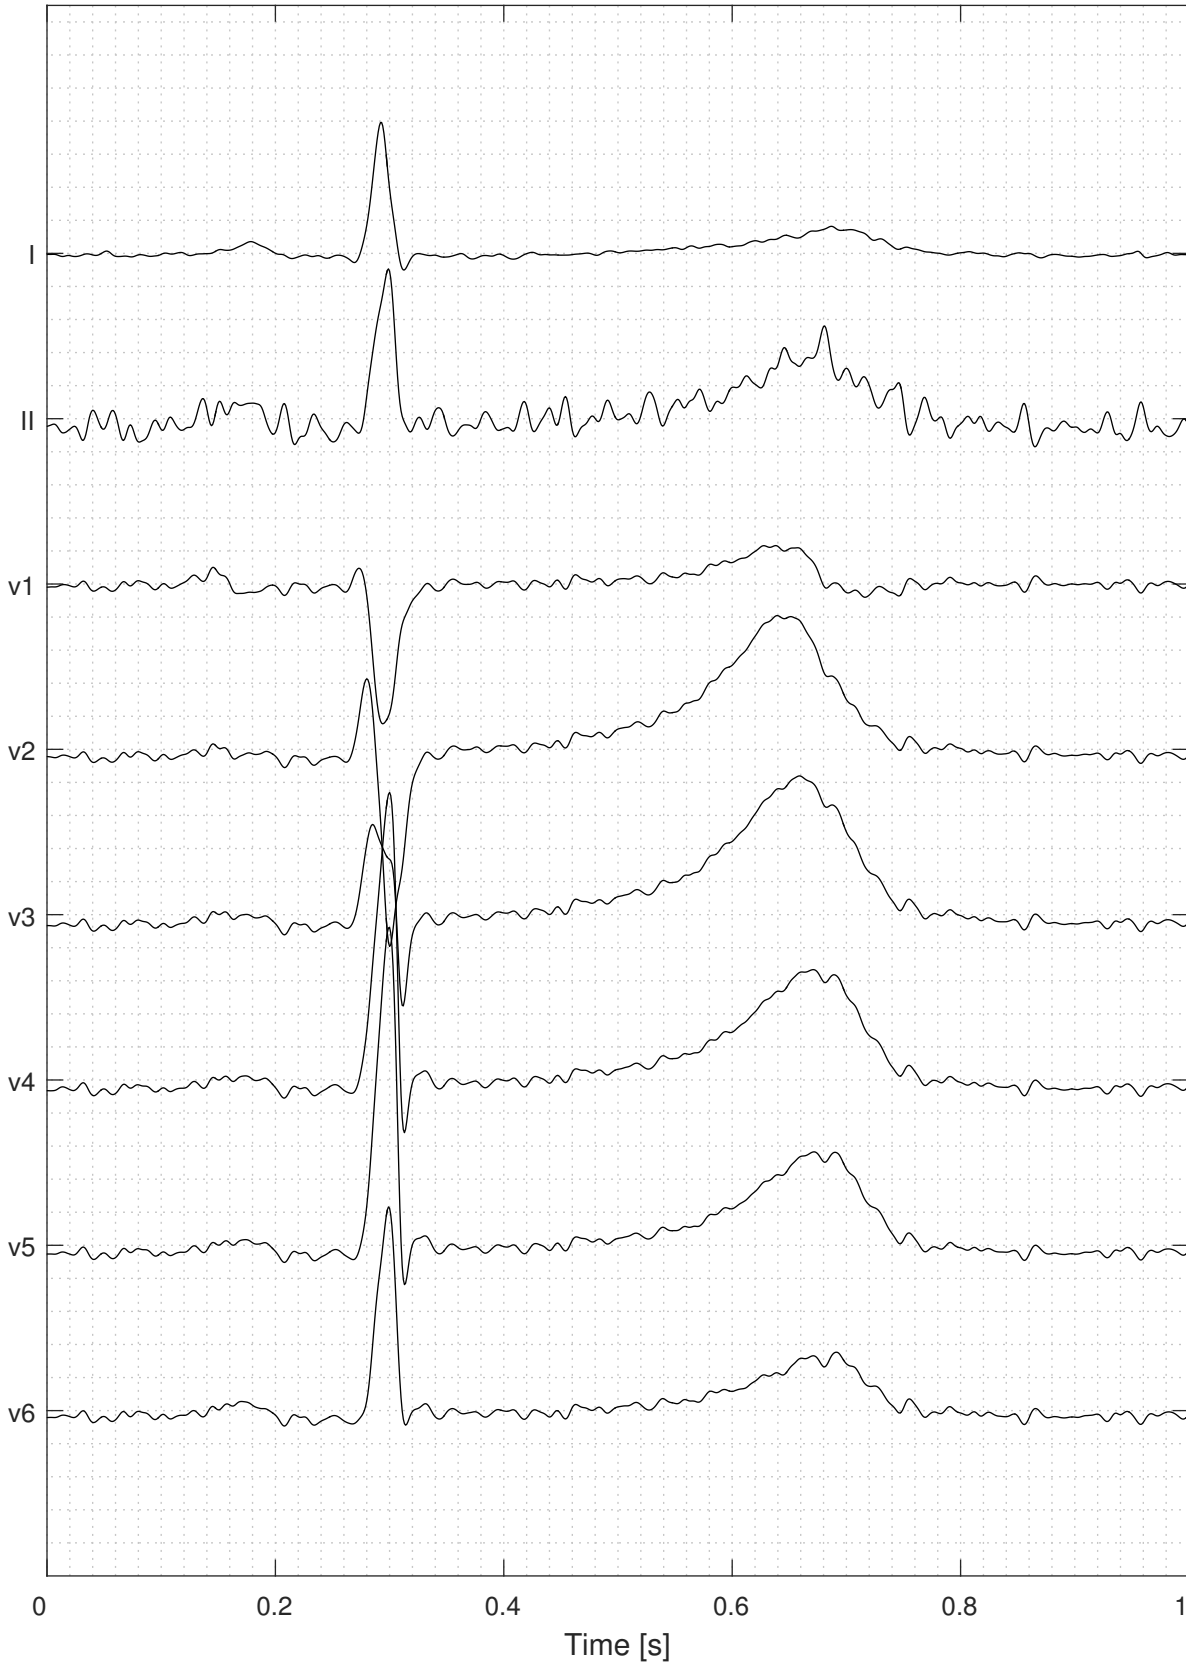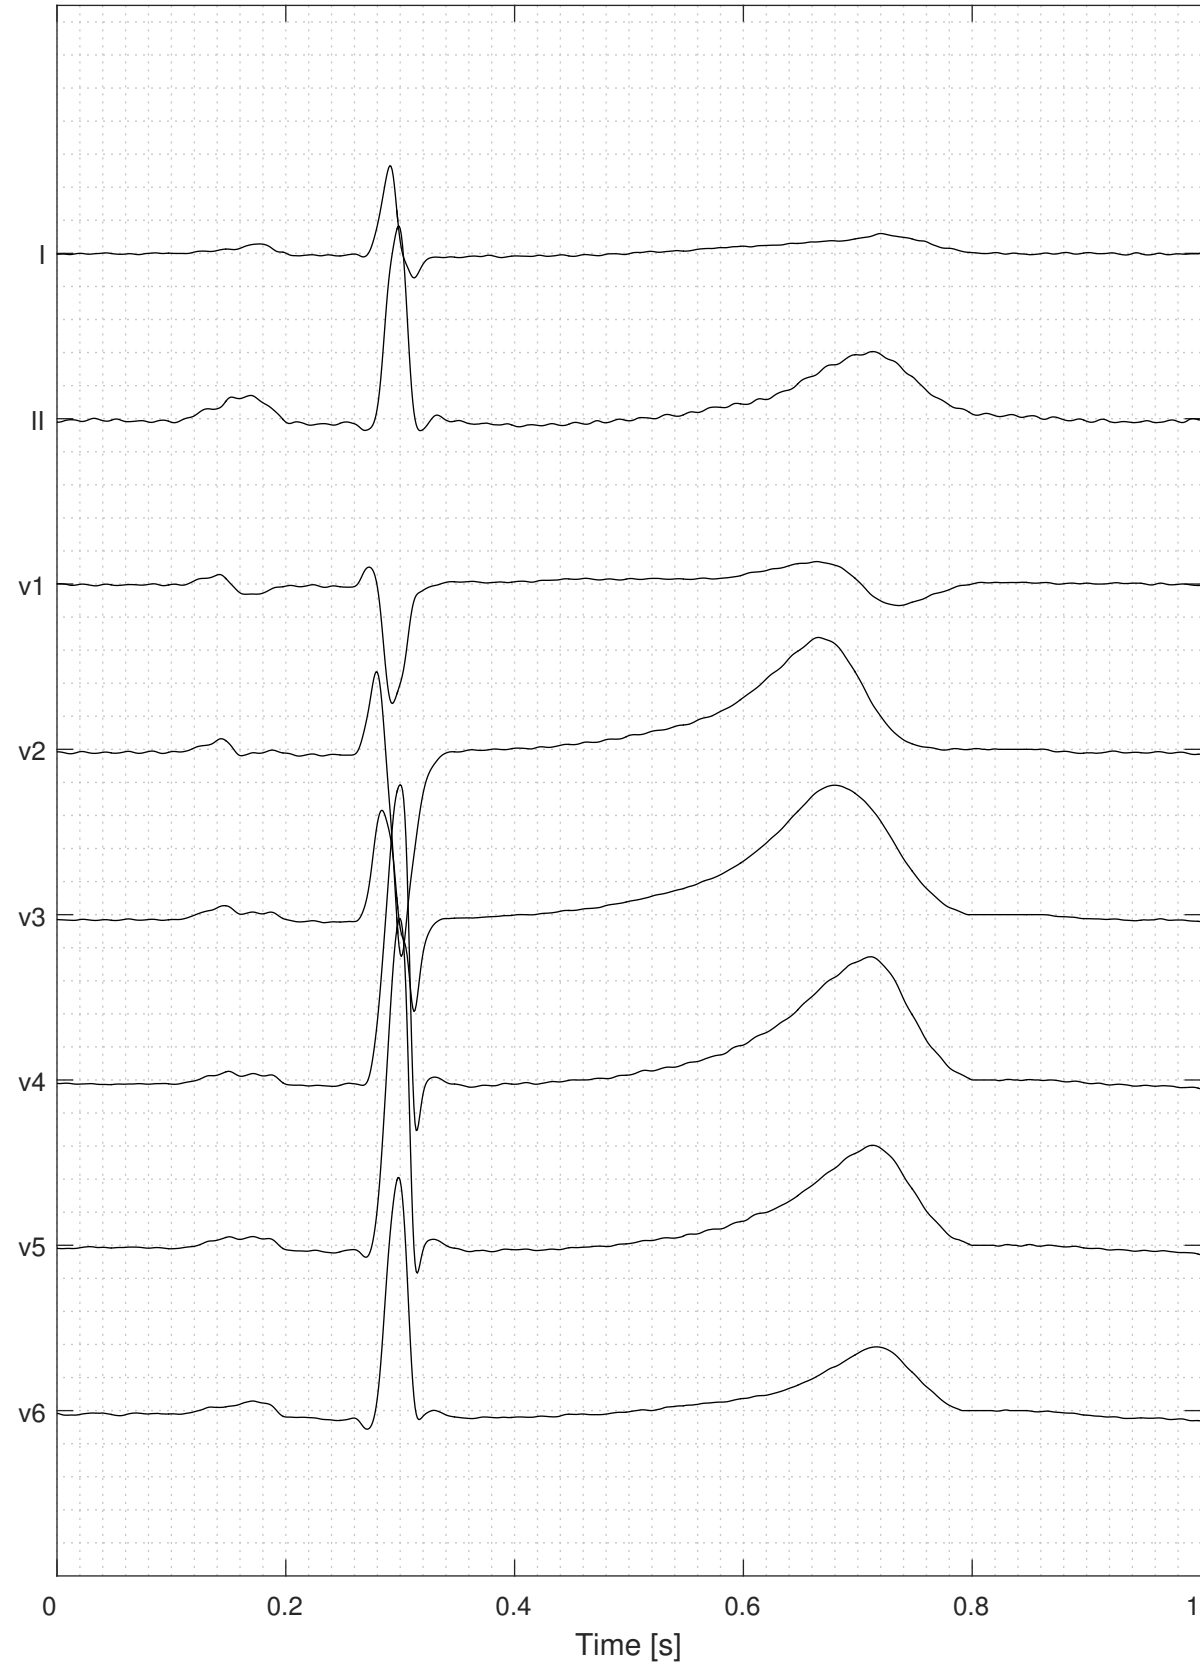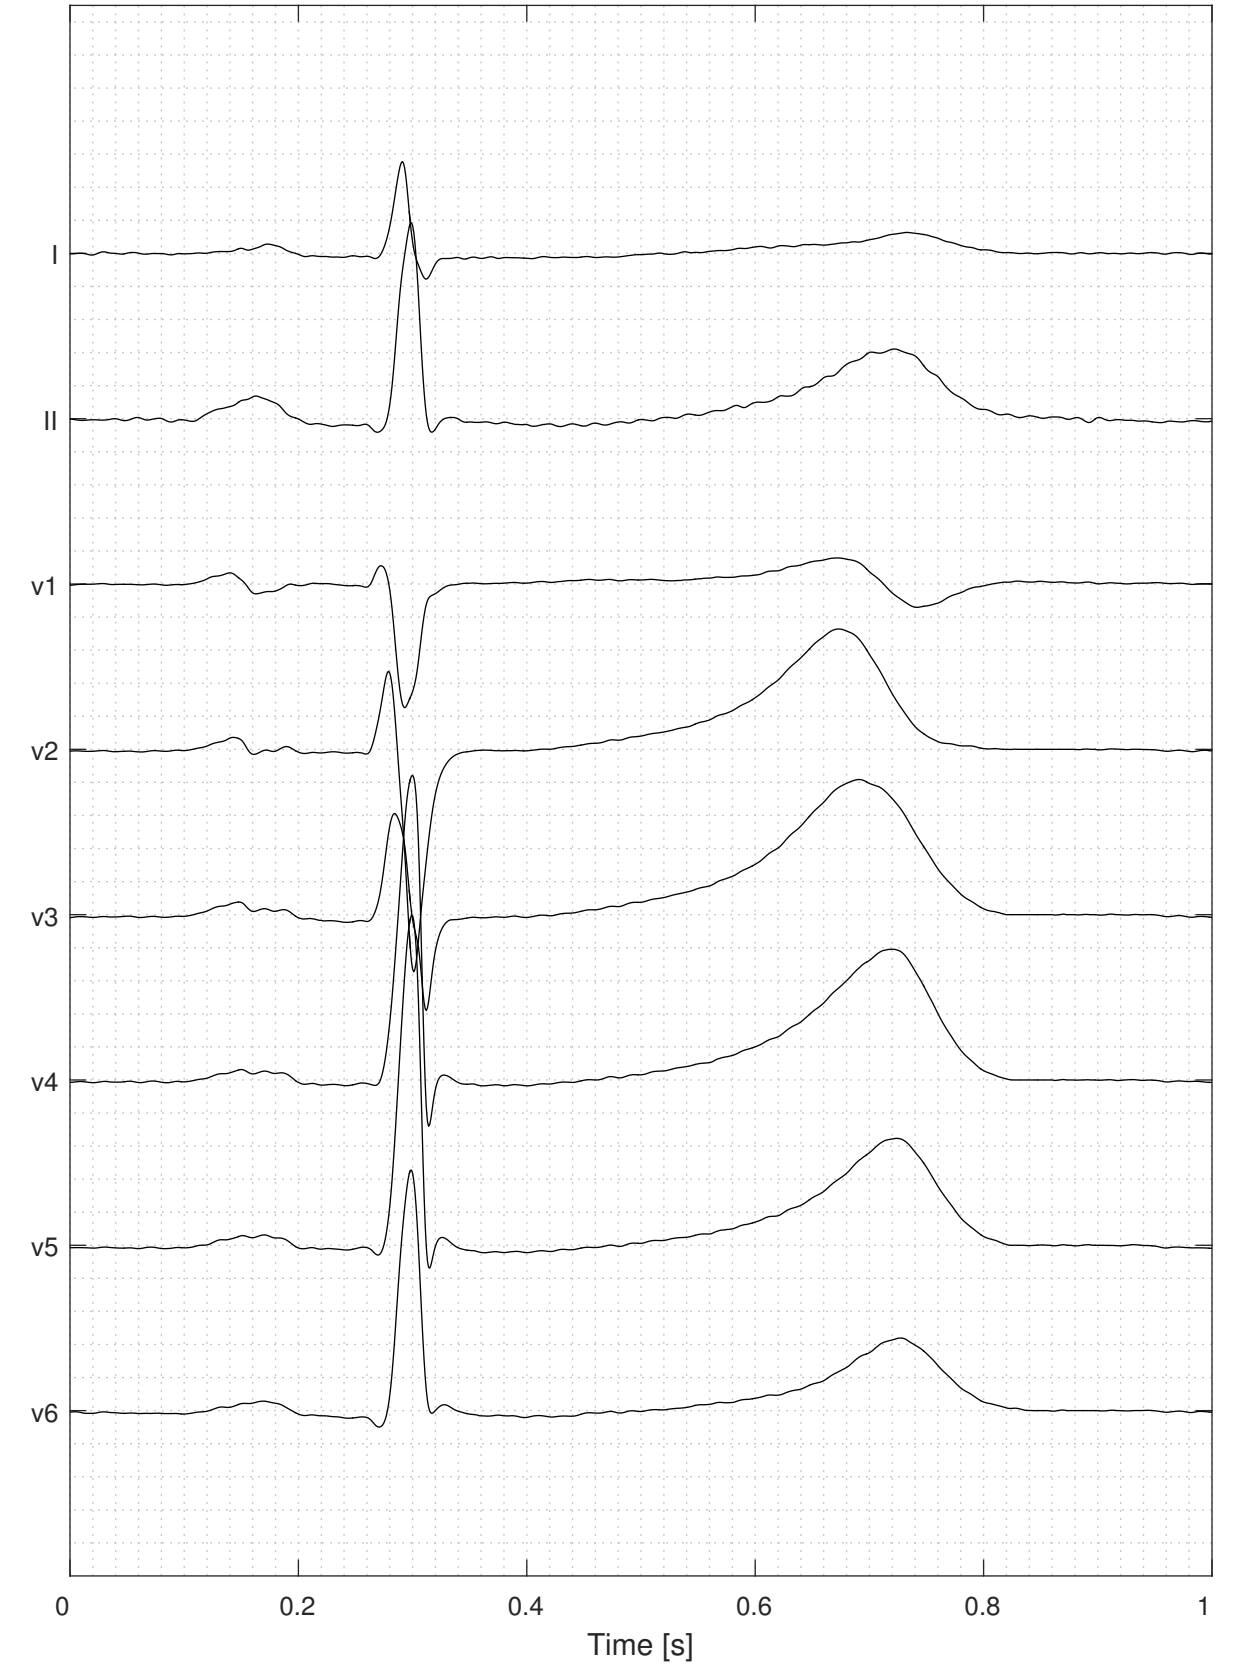

Patient 2

Low RR, Complex #: 256

Mid RR, Complex #: 10

High RR, Complex #: 137

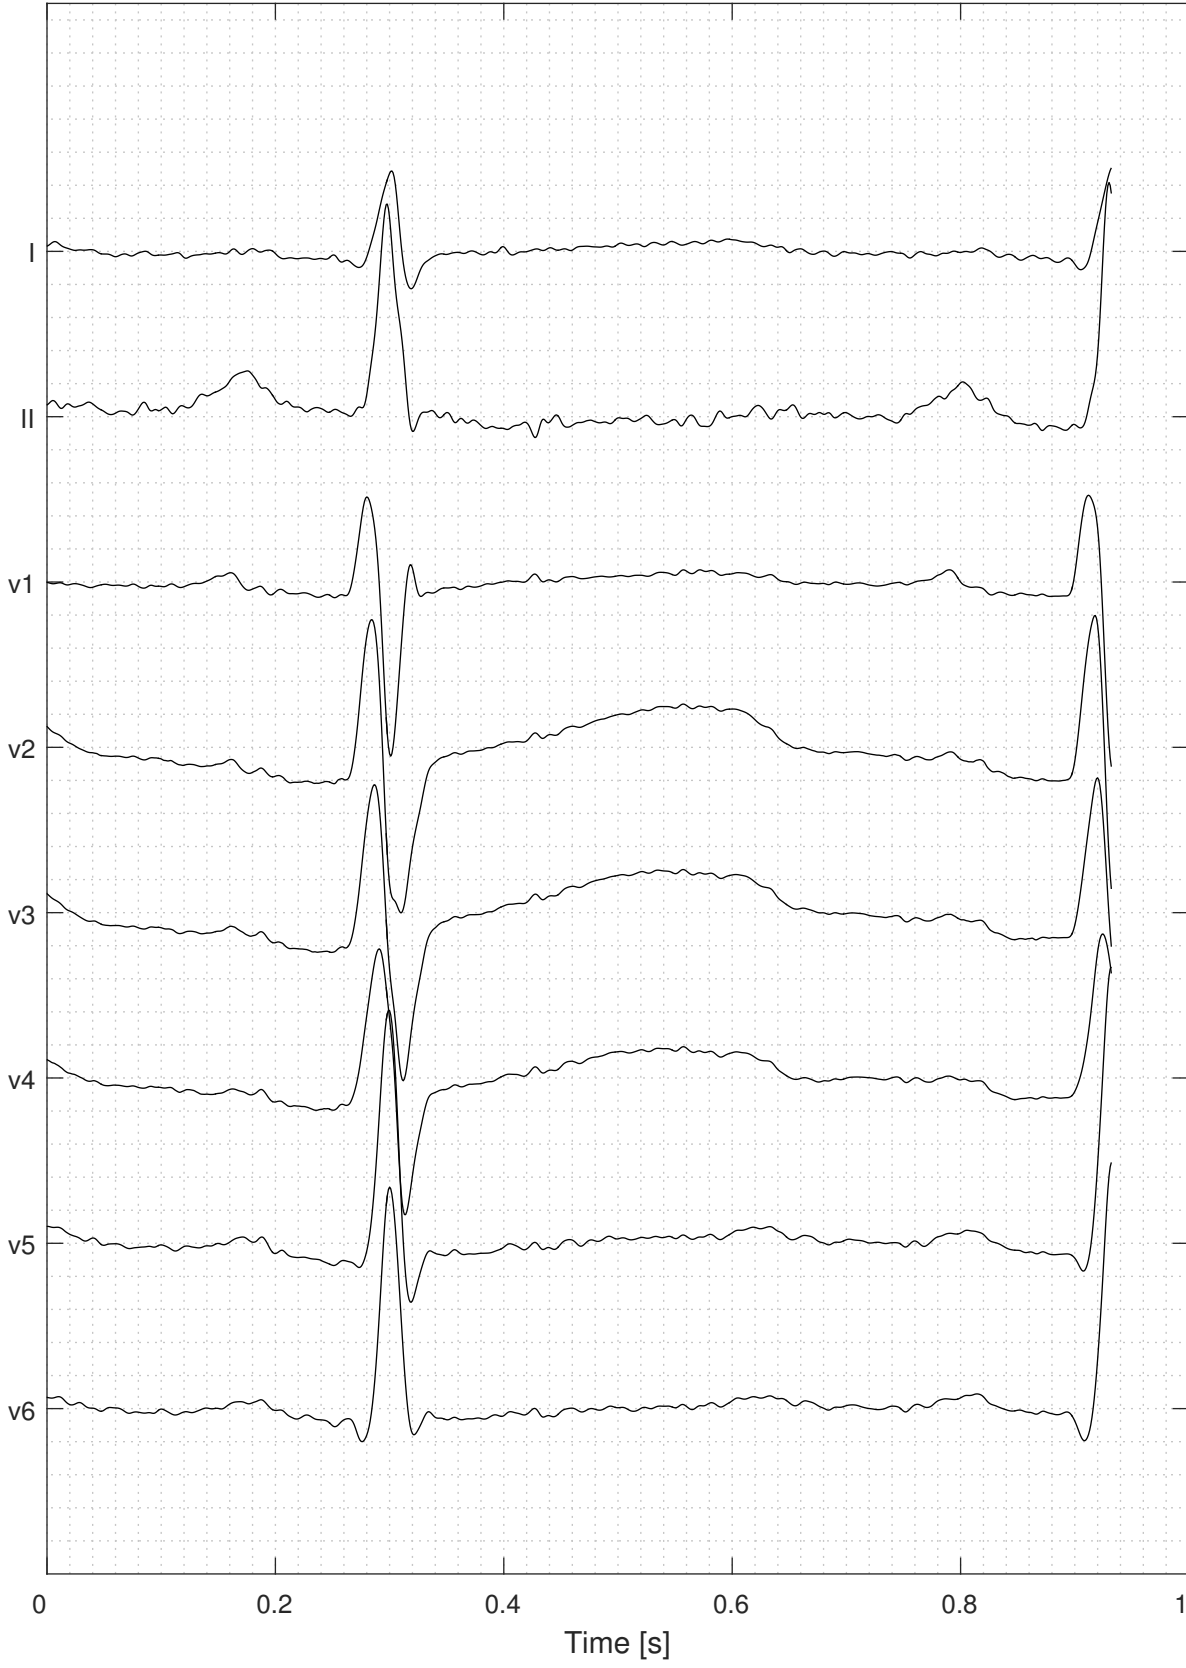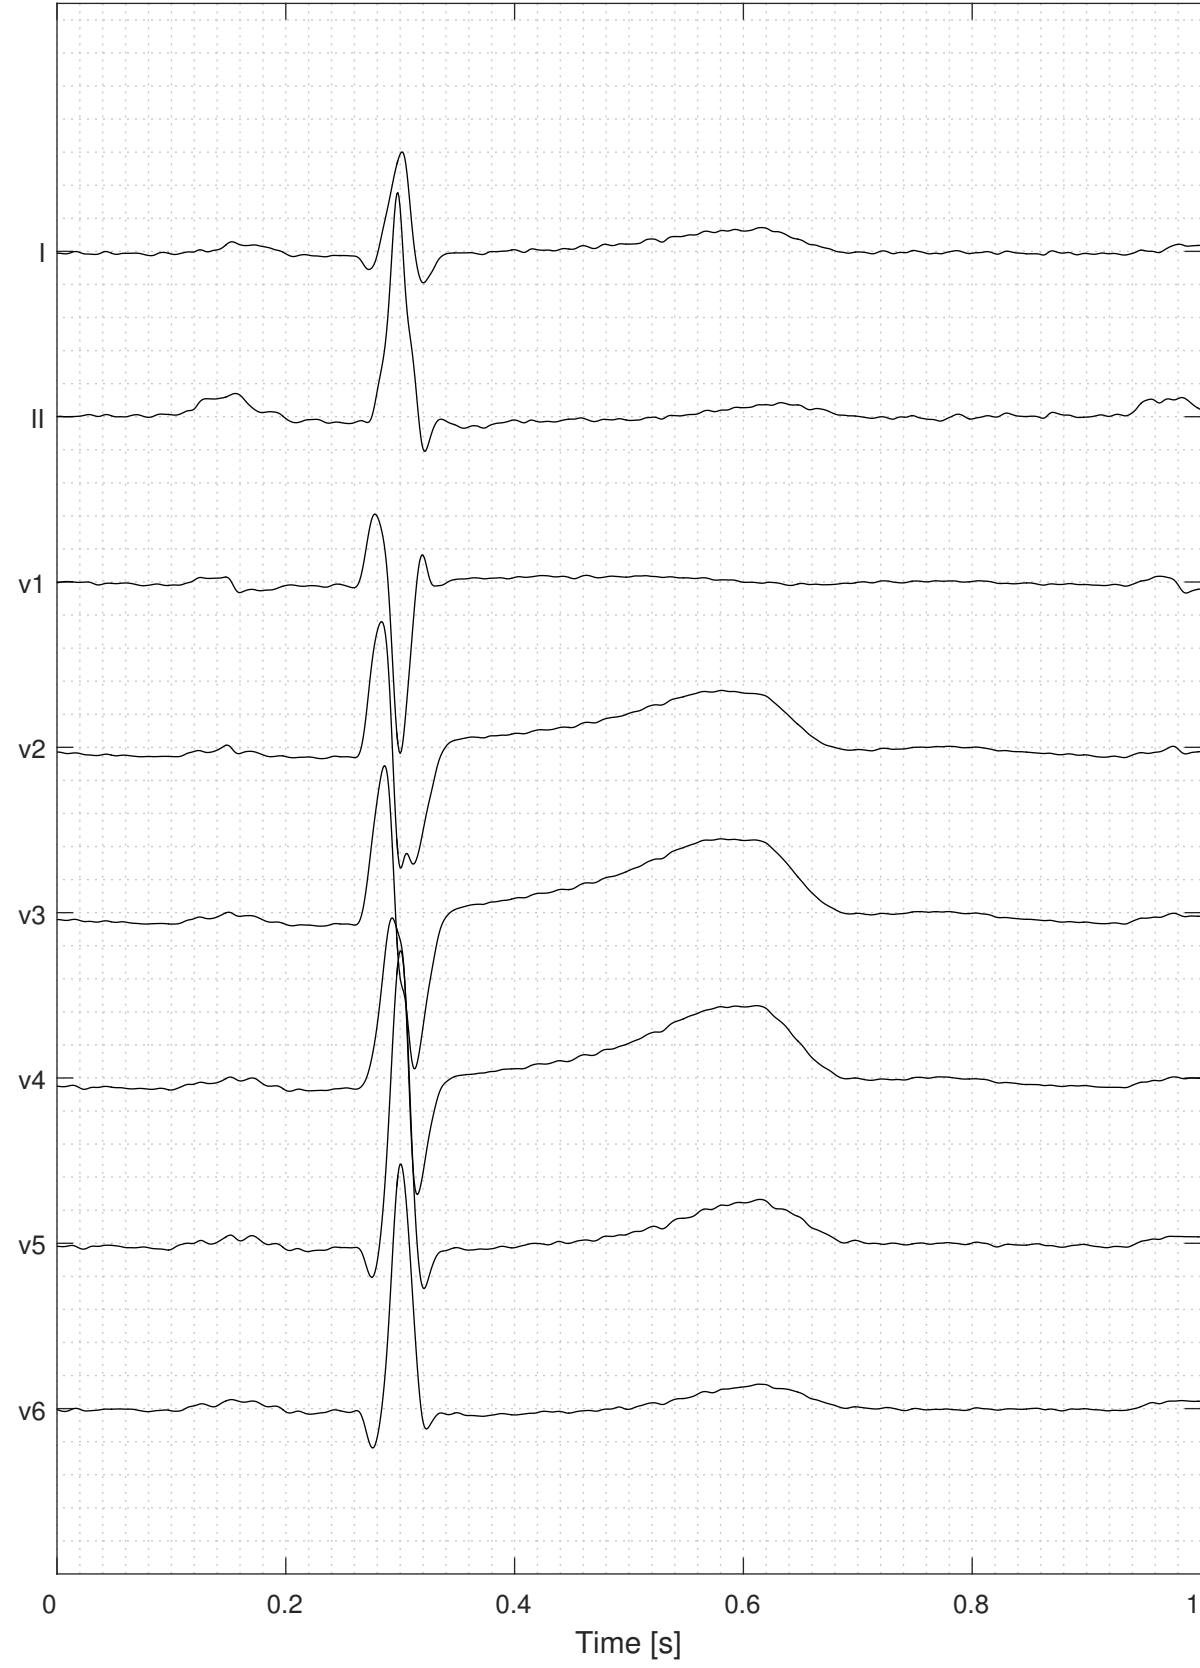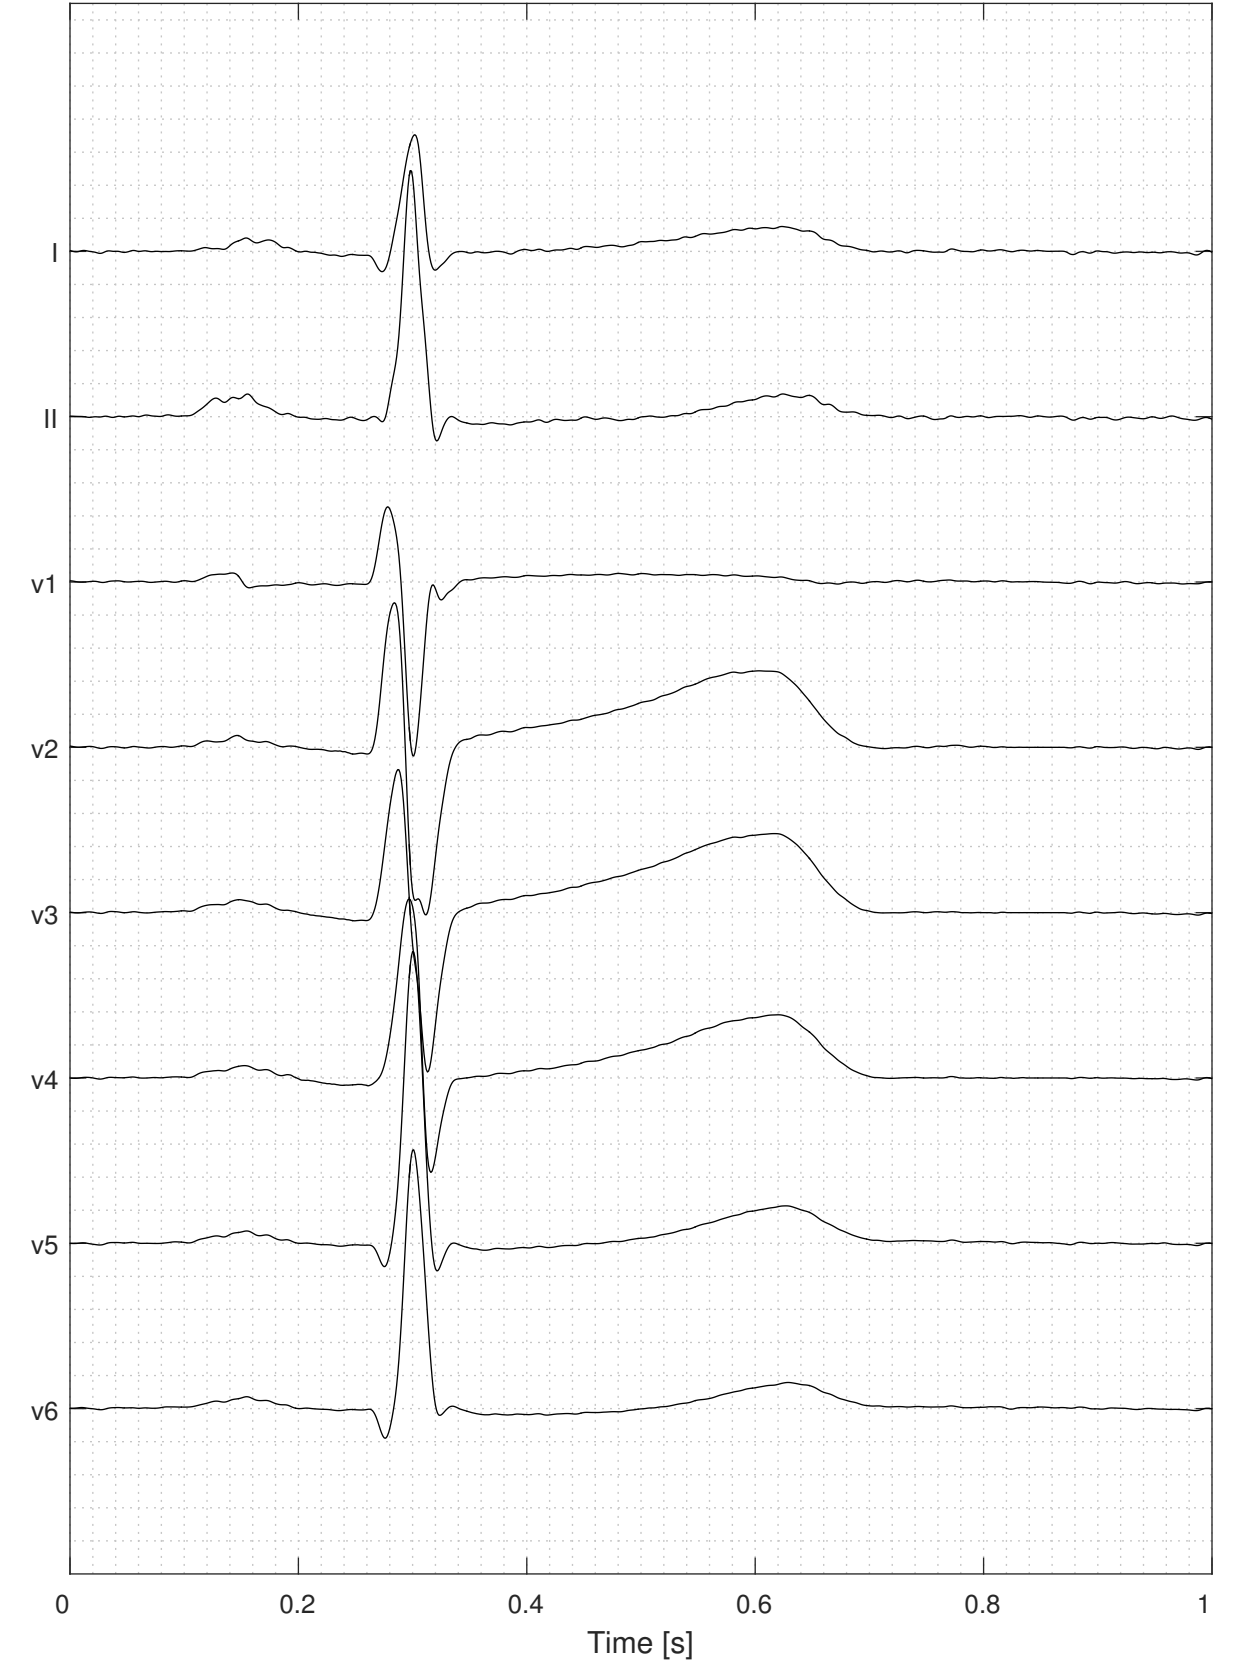

### Patient 3

Low RR, Complex #: 214

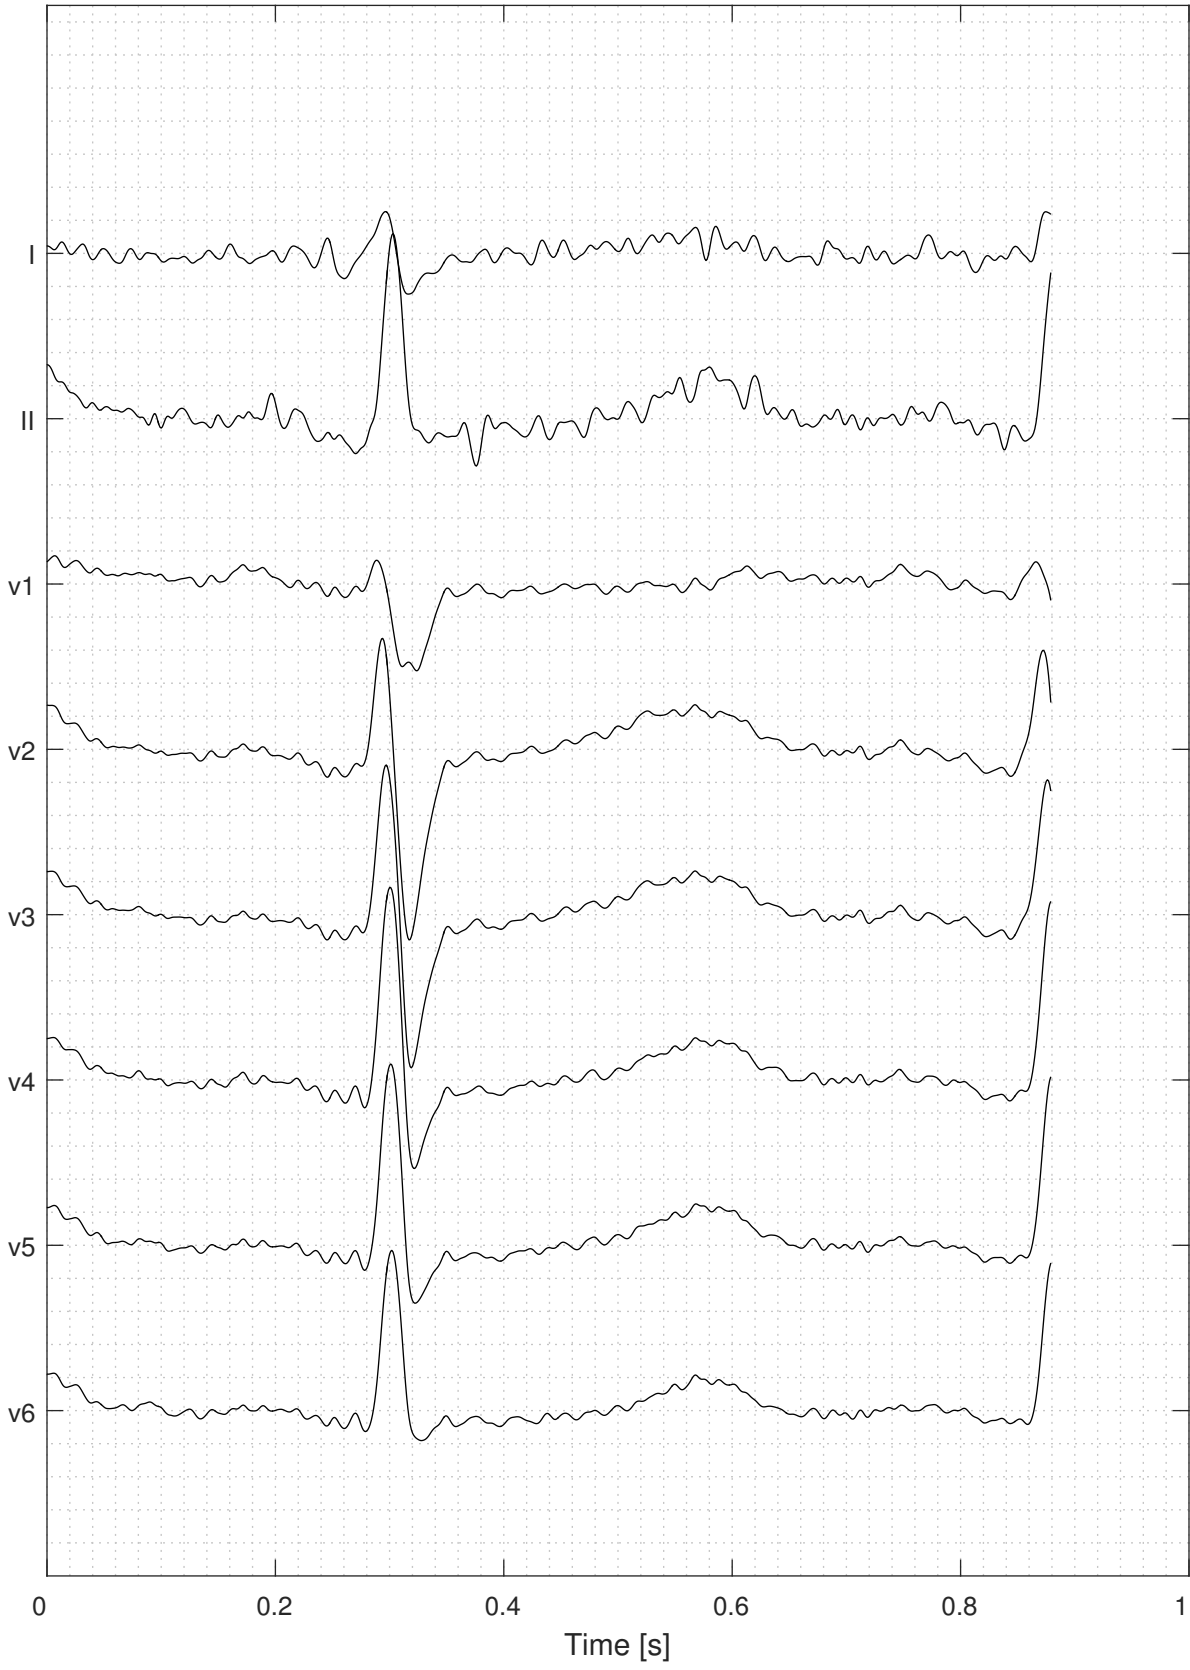

Mid RR, Complex #: 13

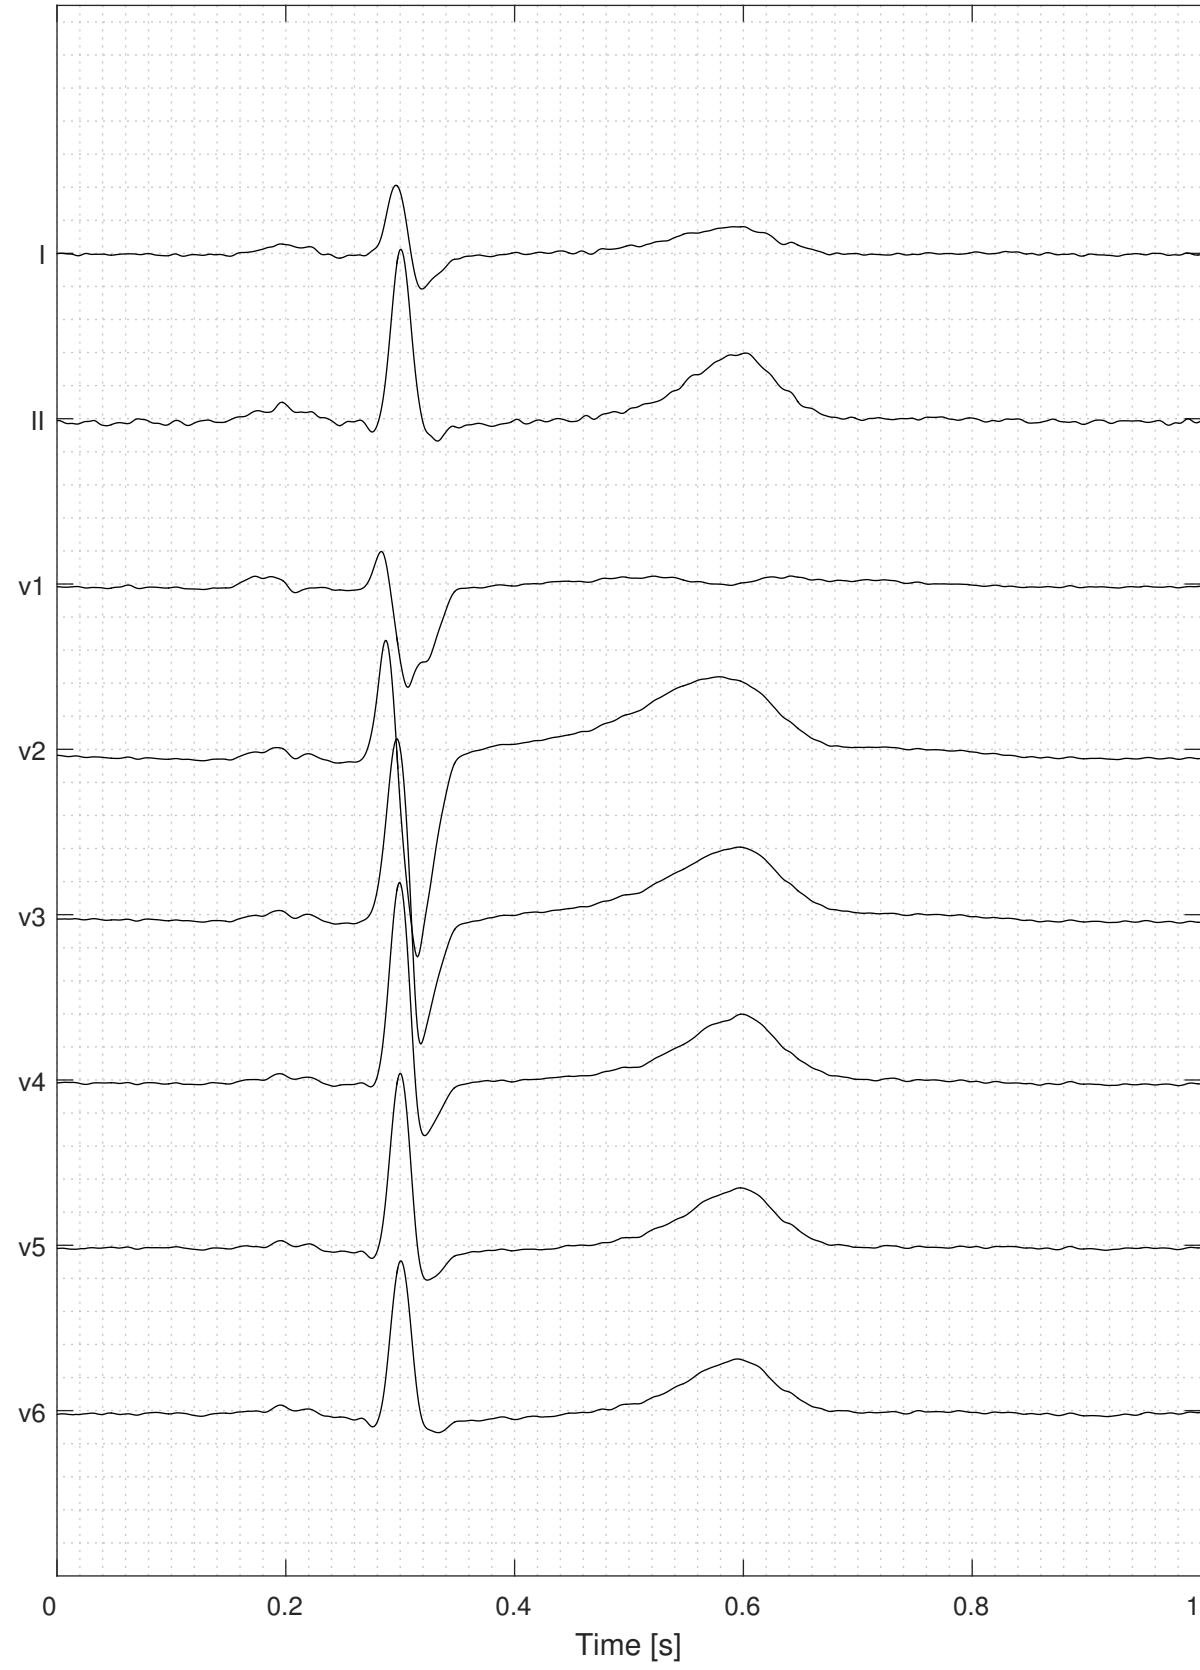

High RR, Complex #: 105

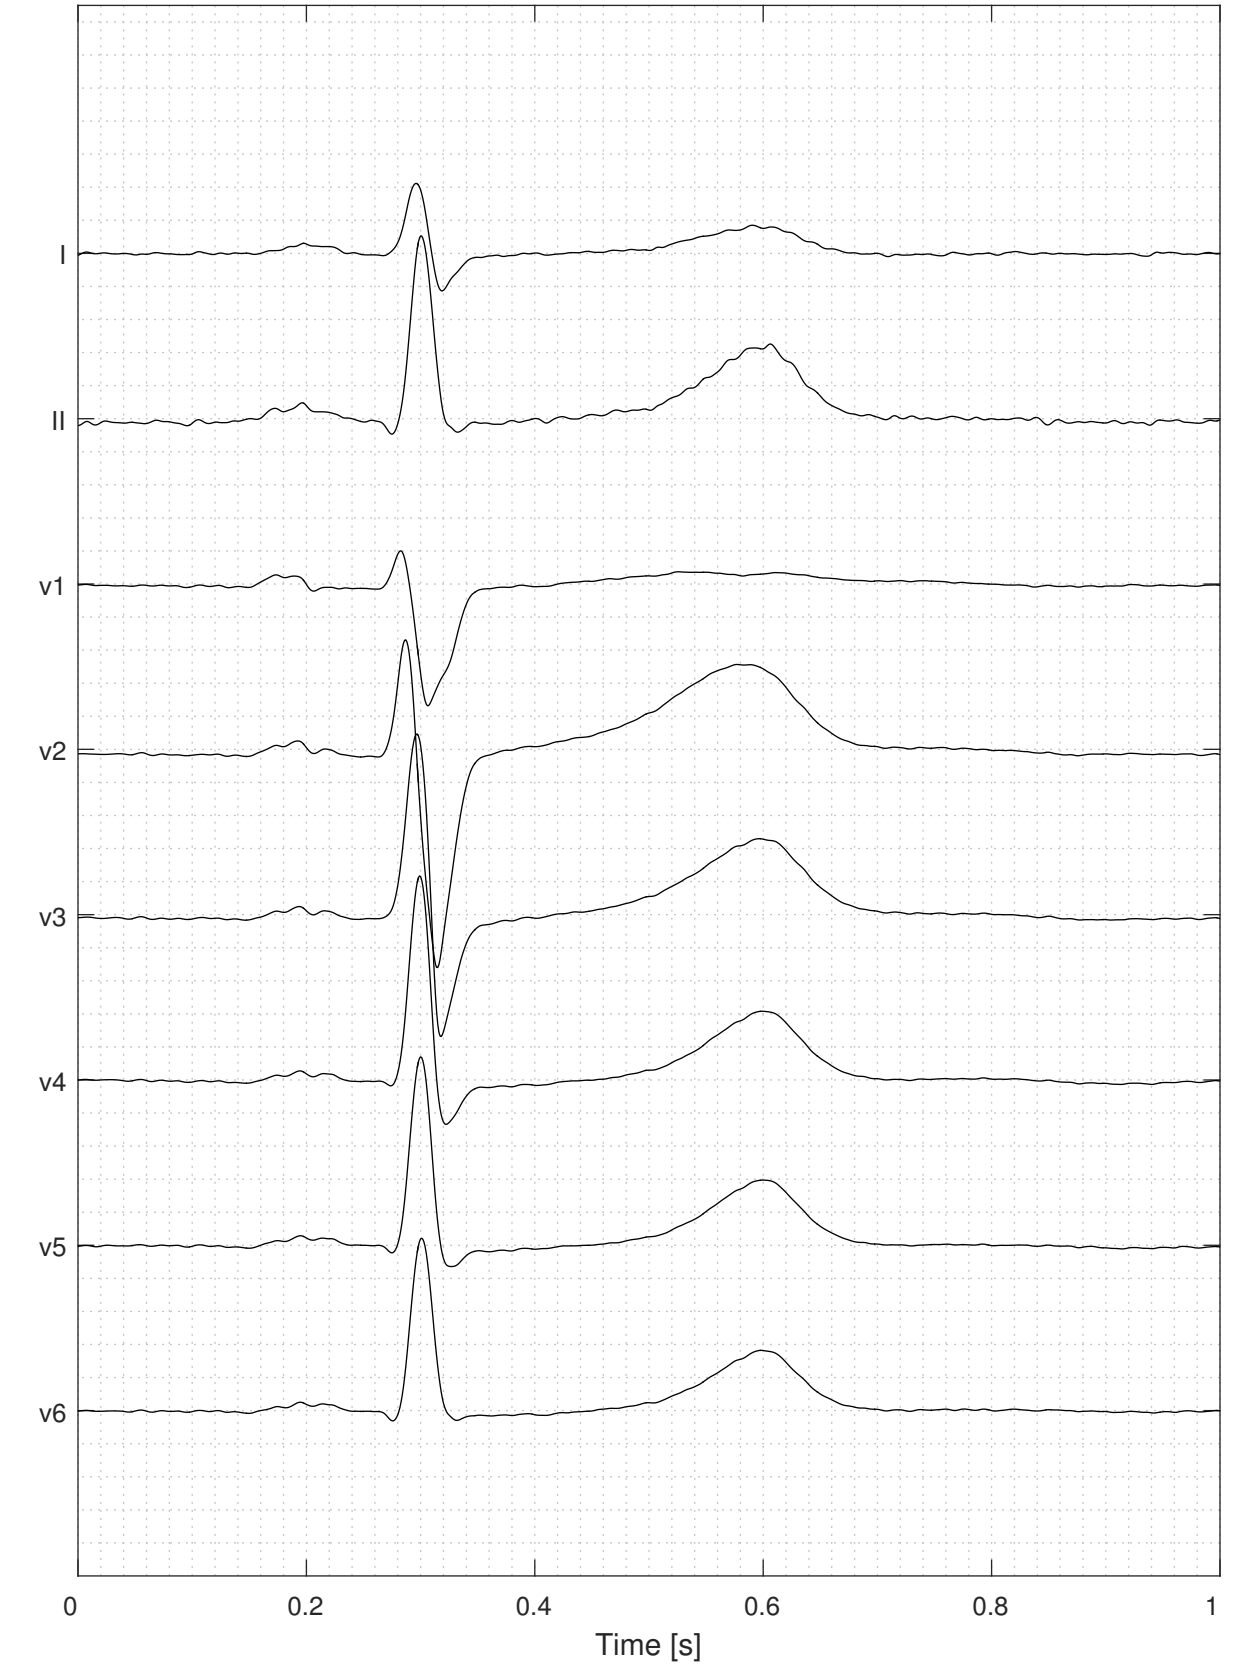

Patient 4

Low RR, Complex #: 184

Mid RR, Complex #: 32

High RR, Complex #: 58

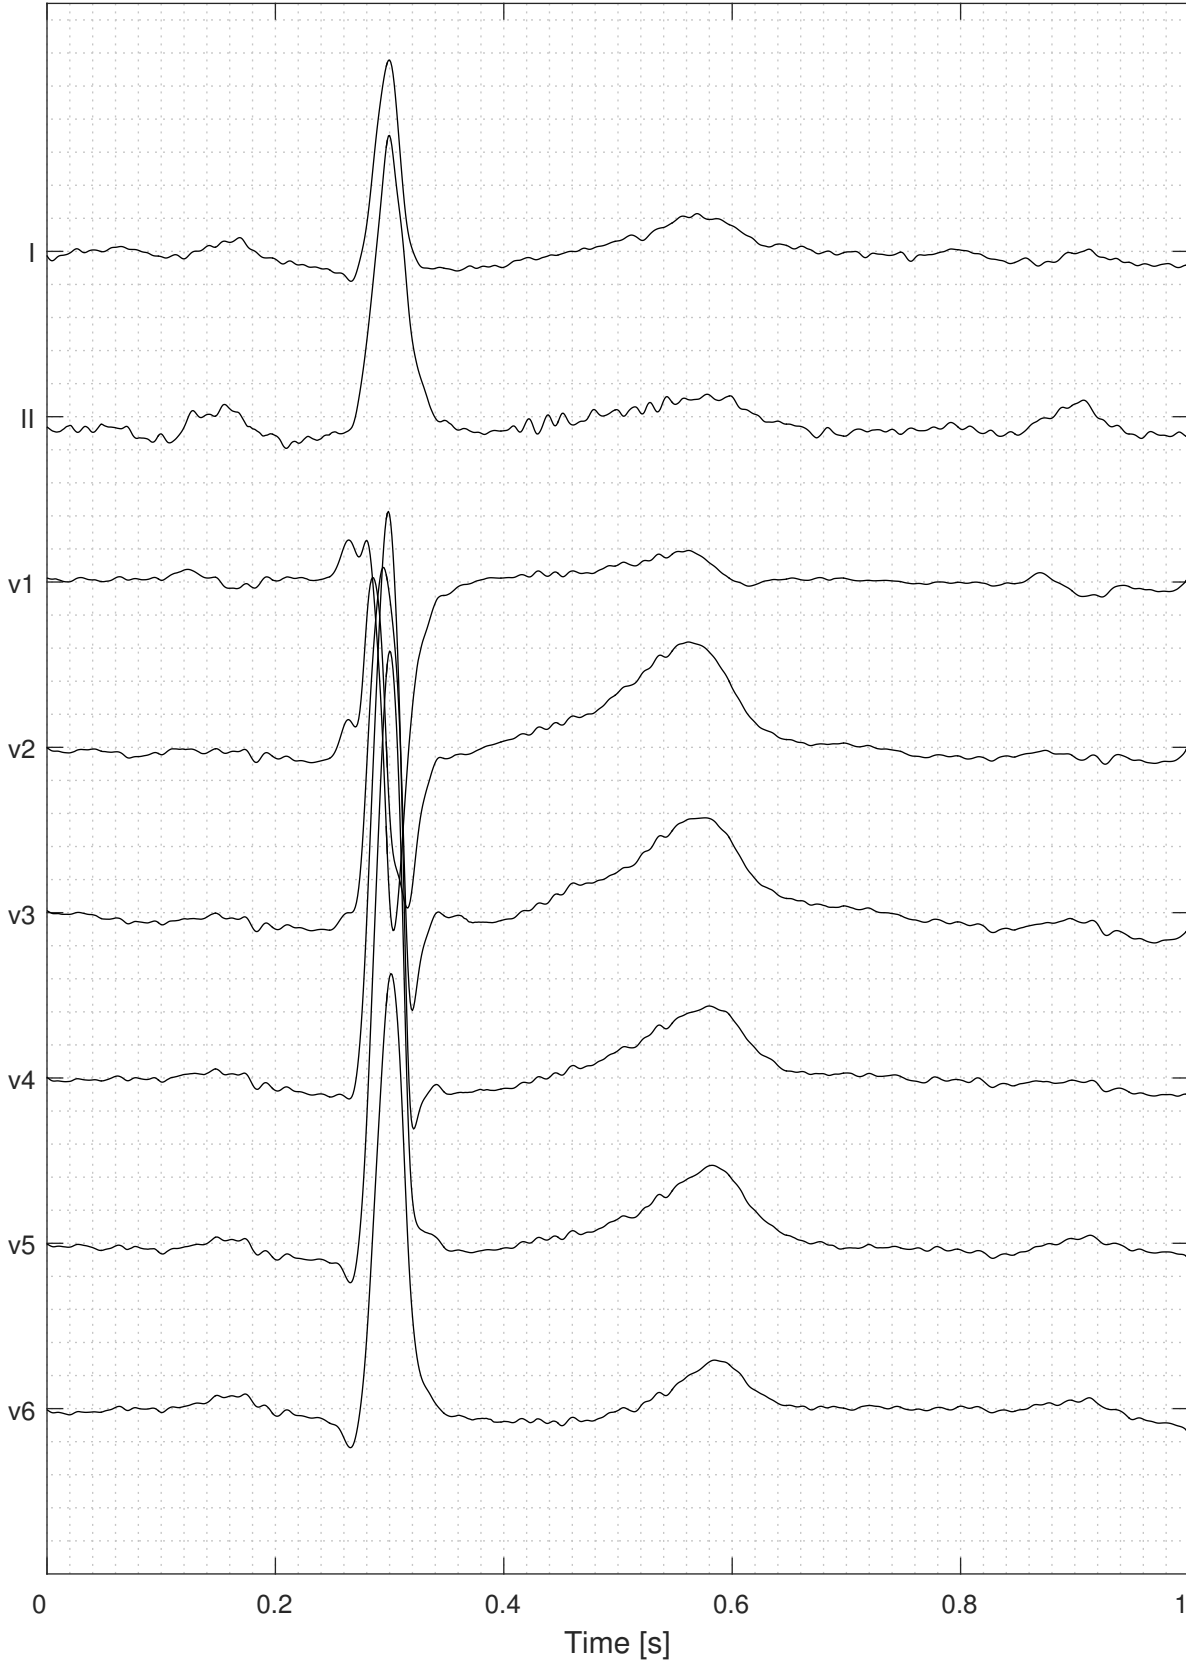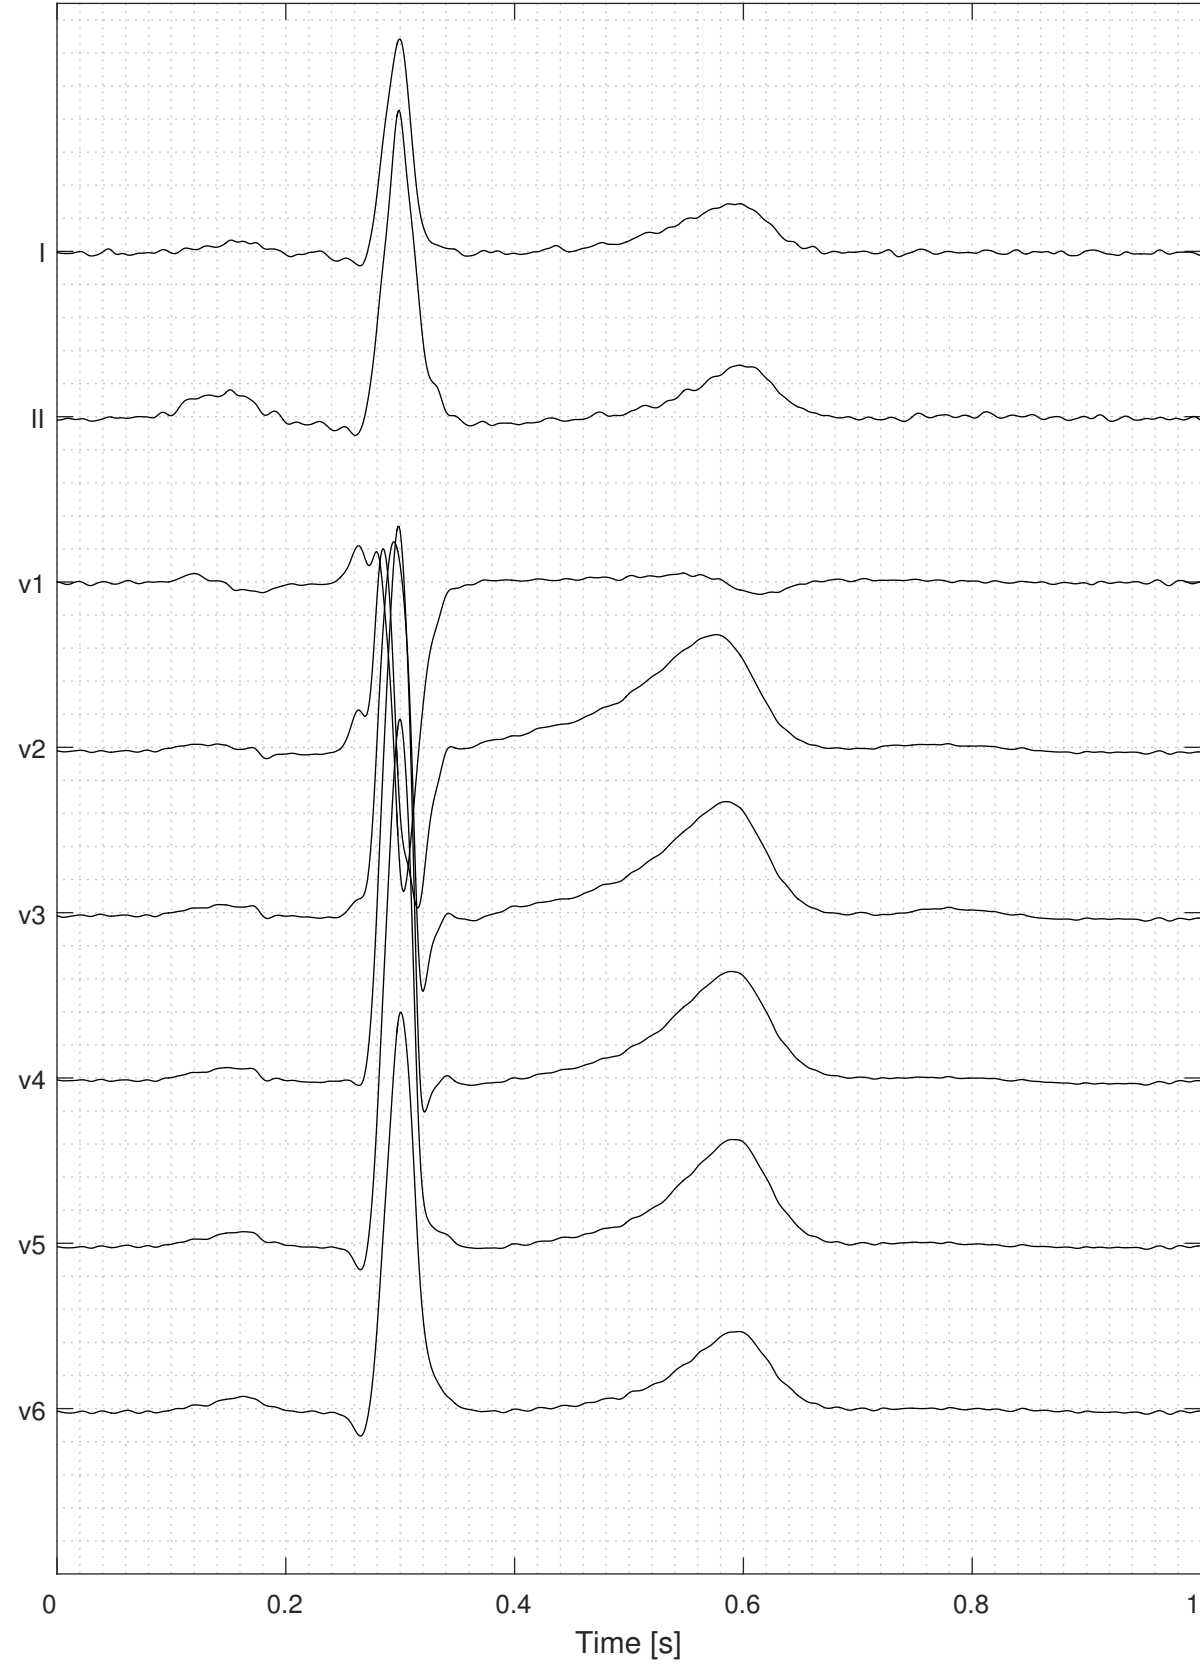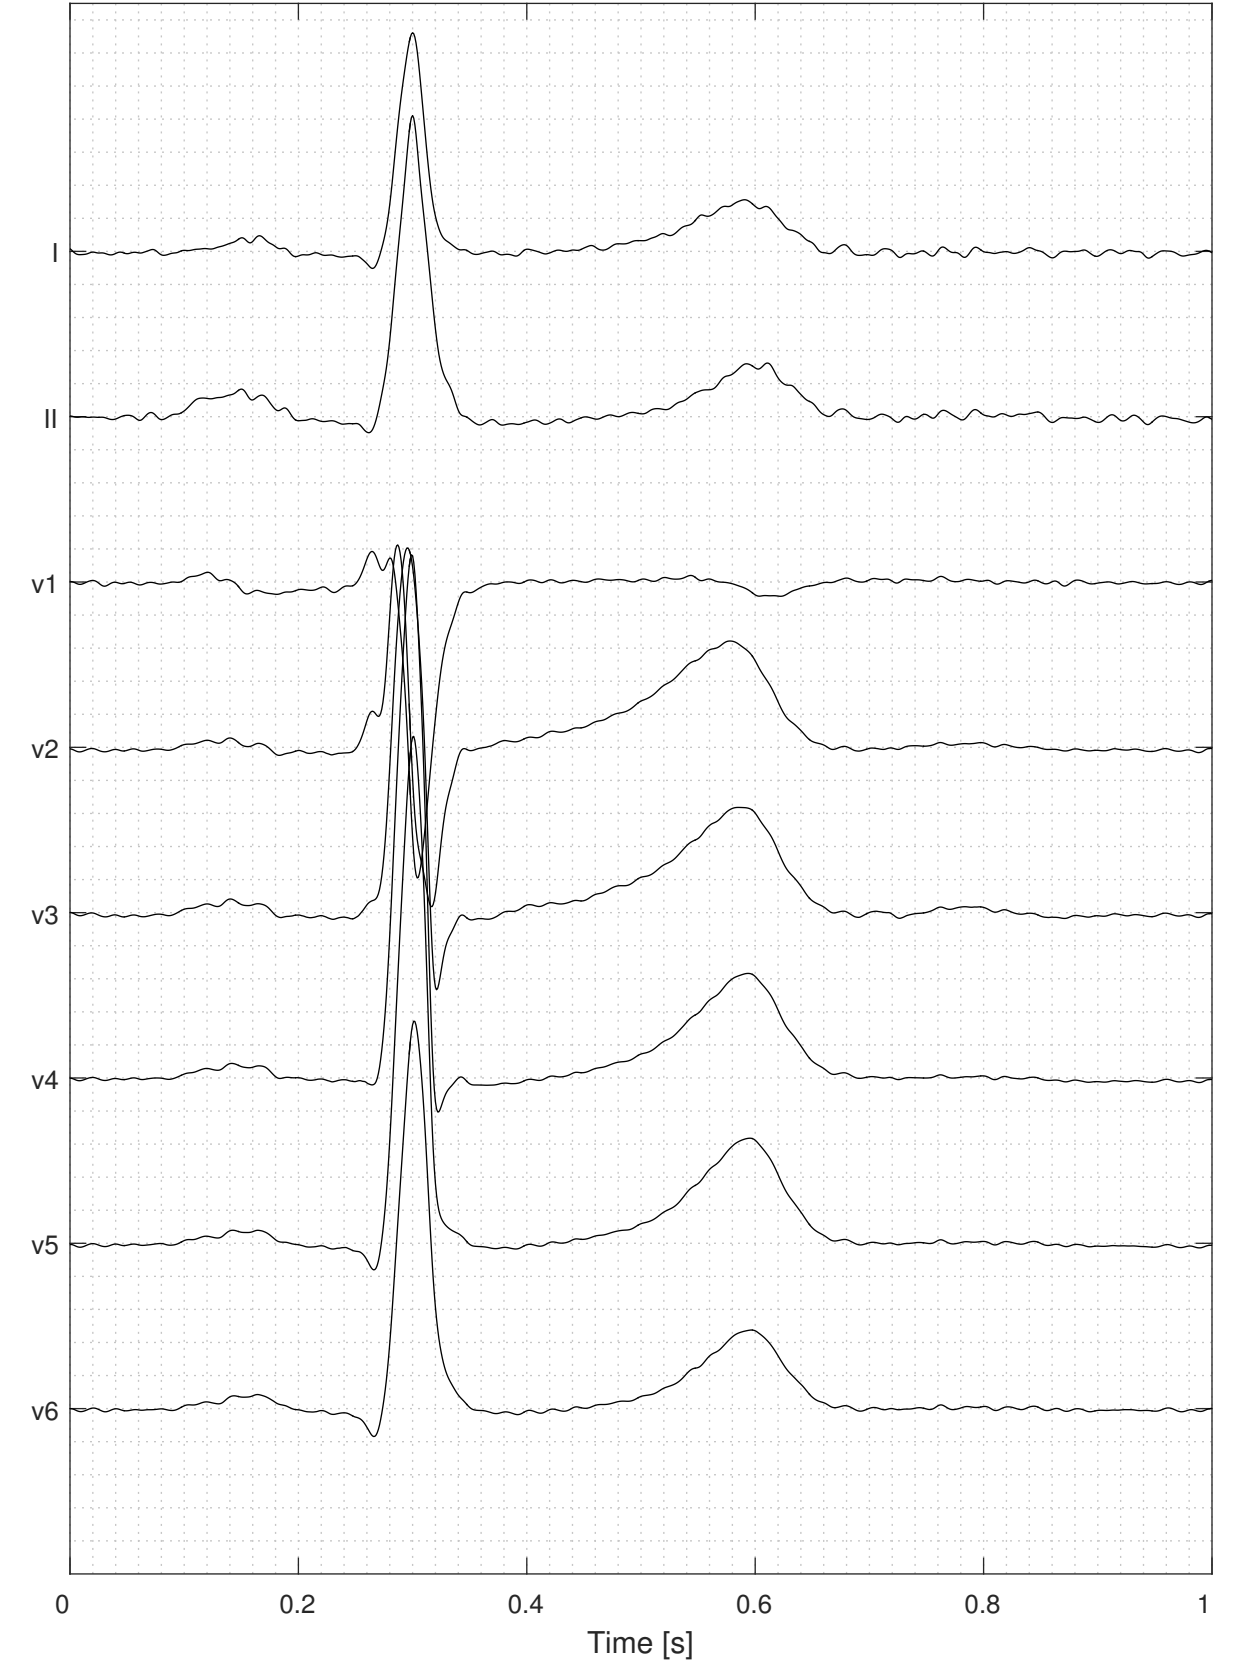

Patient 5

Low RR, Complex #: 122

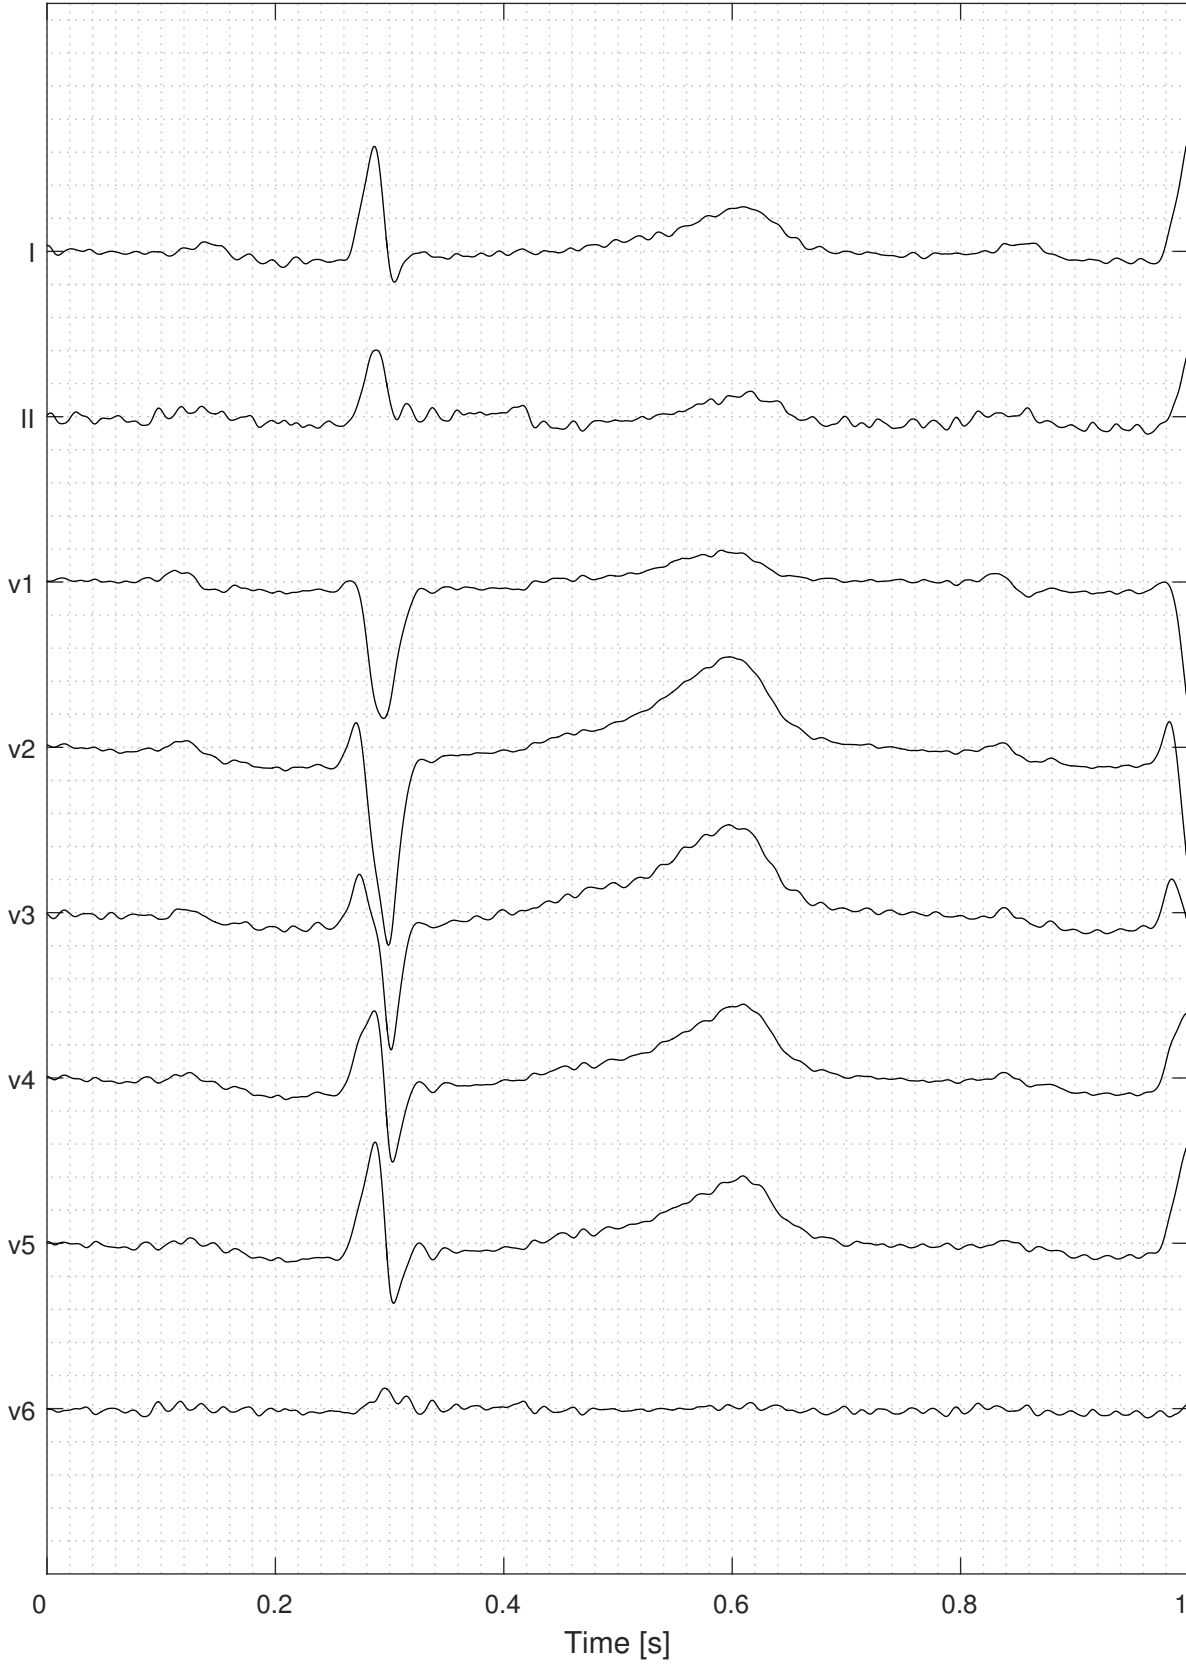

Mid RR, Complex #: 79

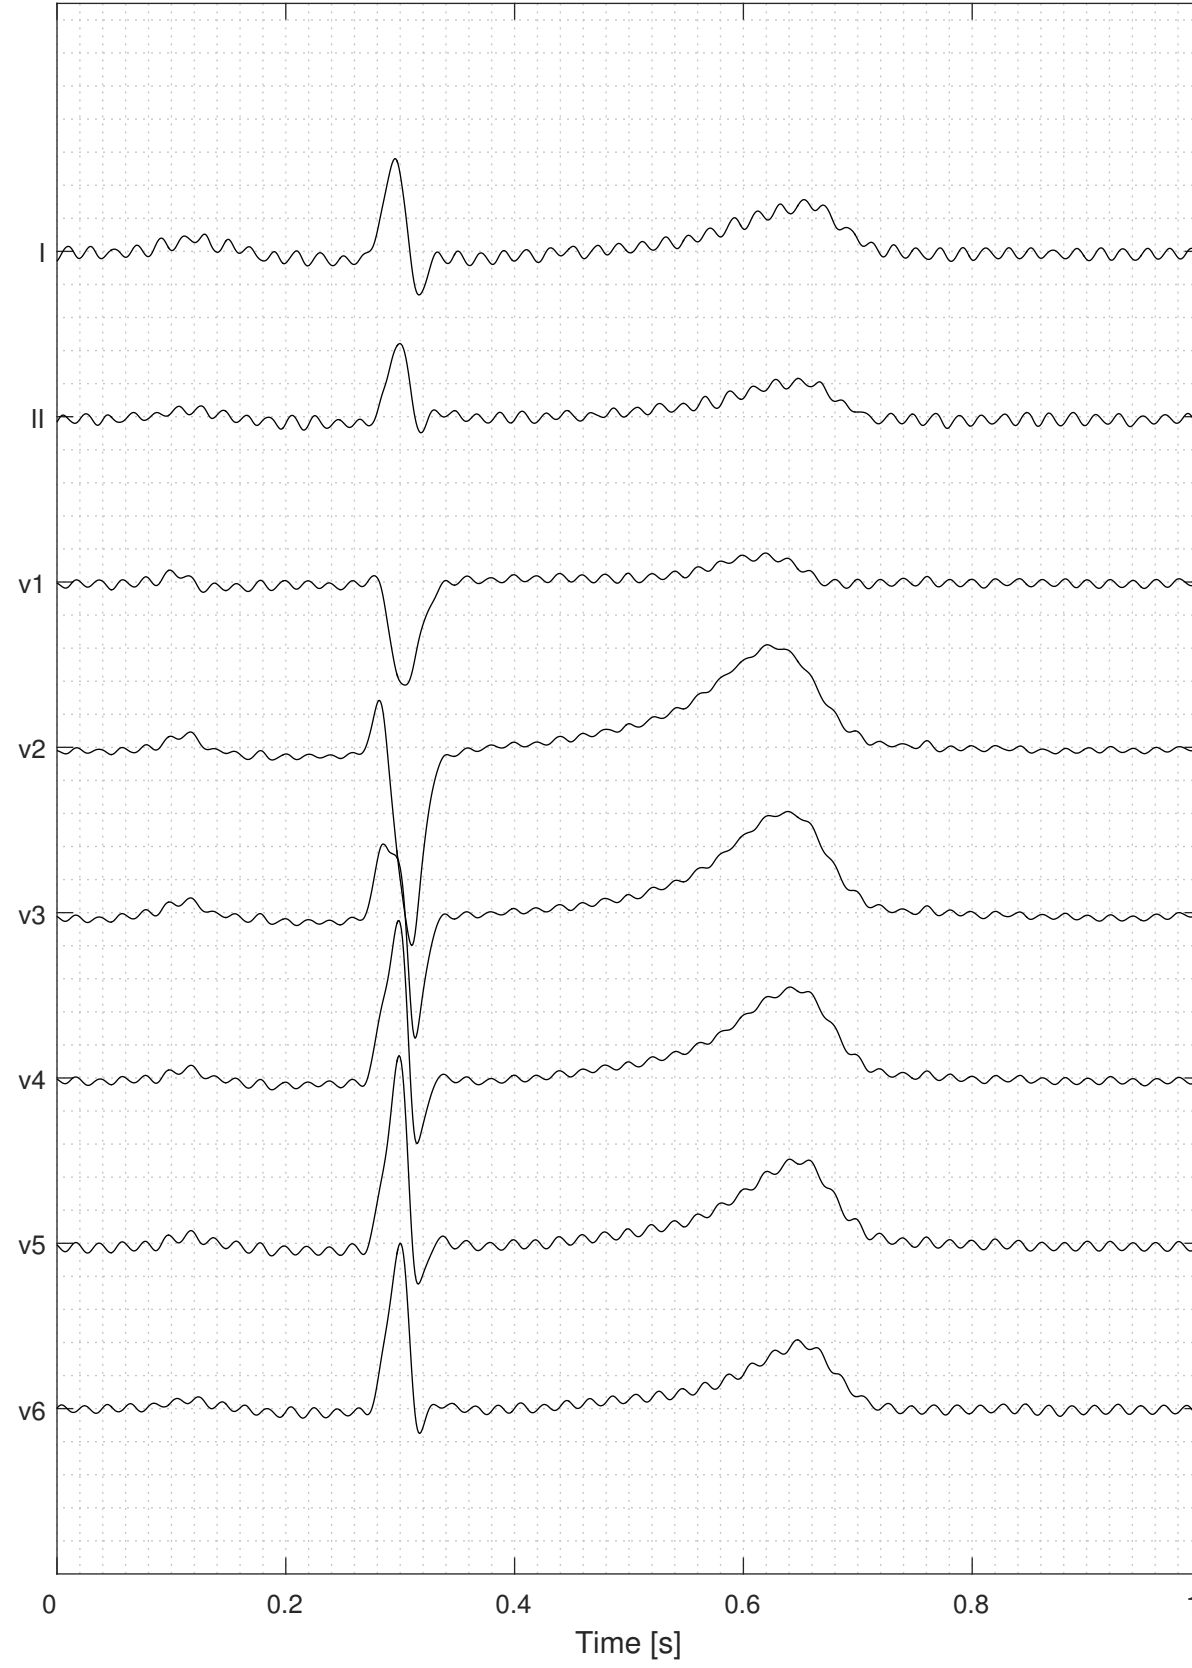

High RR, Complex #: 8

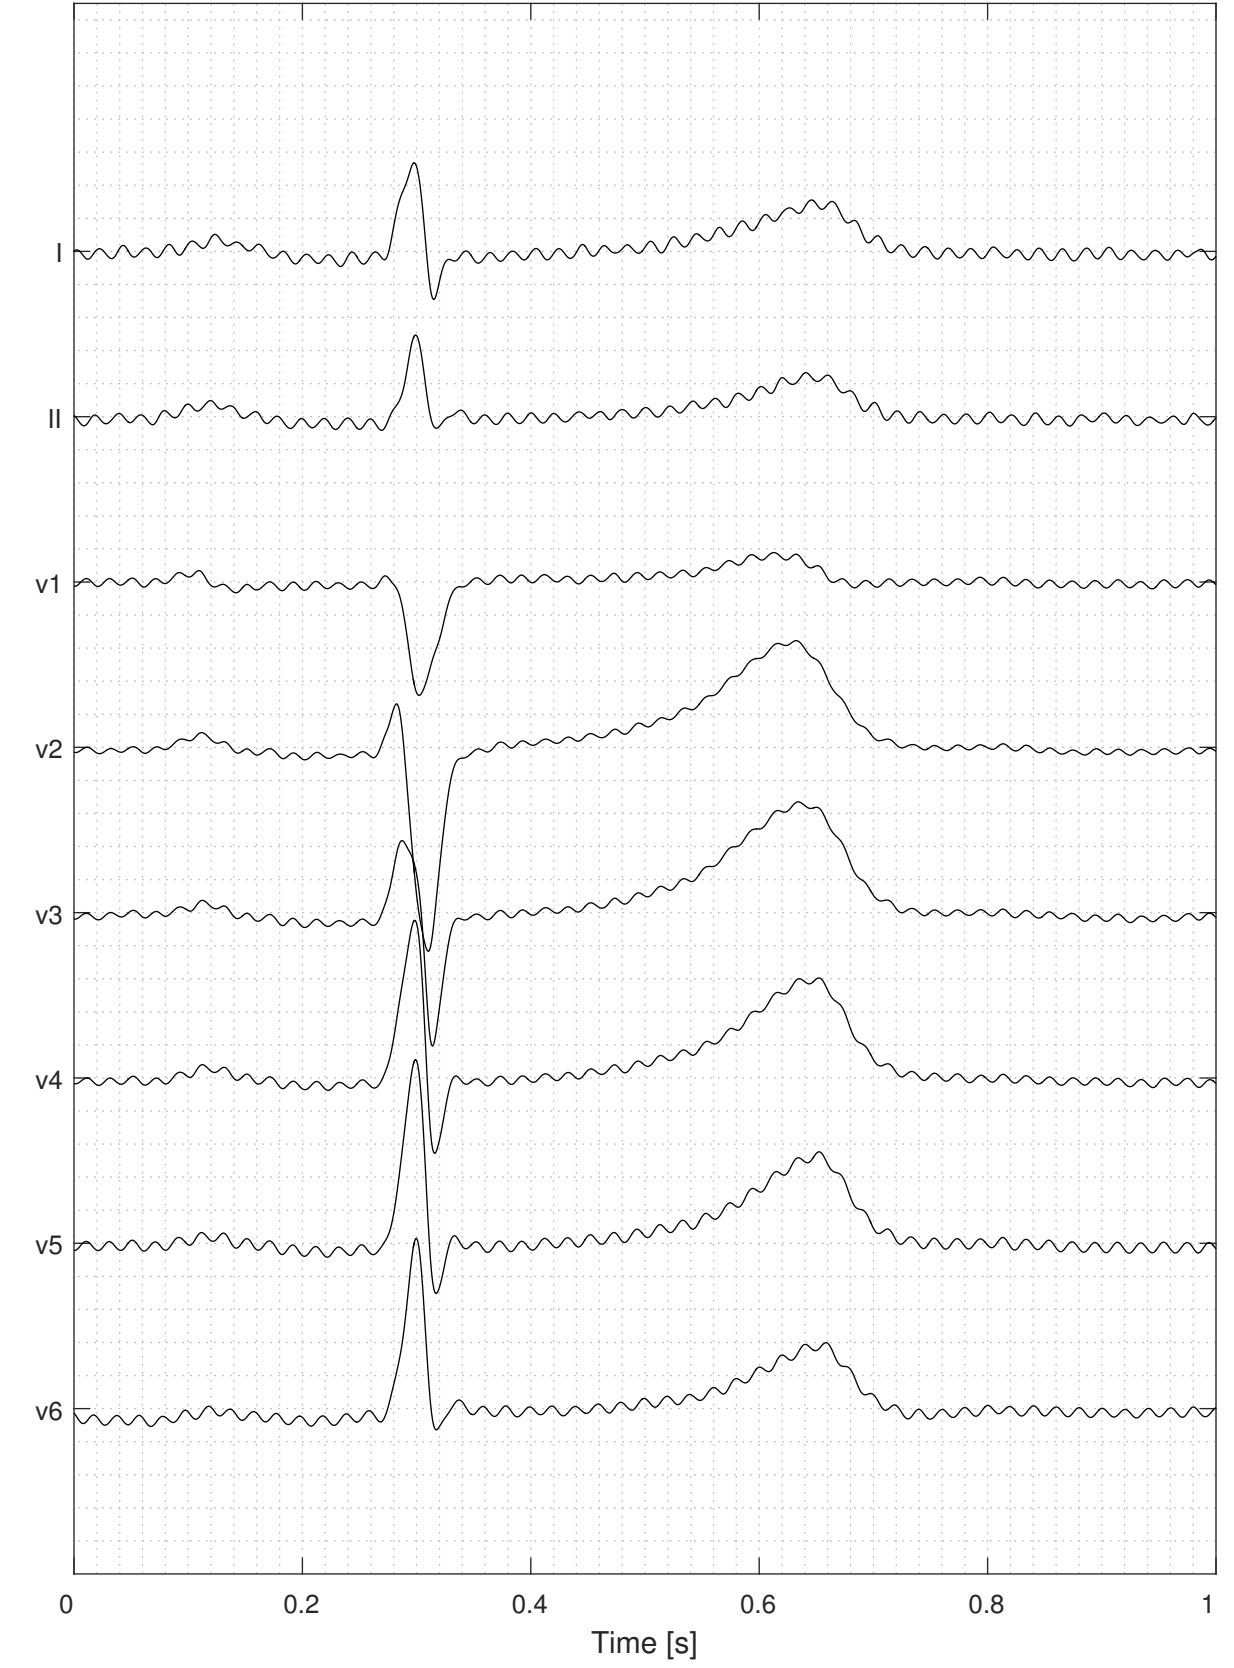

Patient 6

Low RR, Complex #: 278

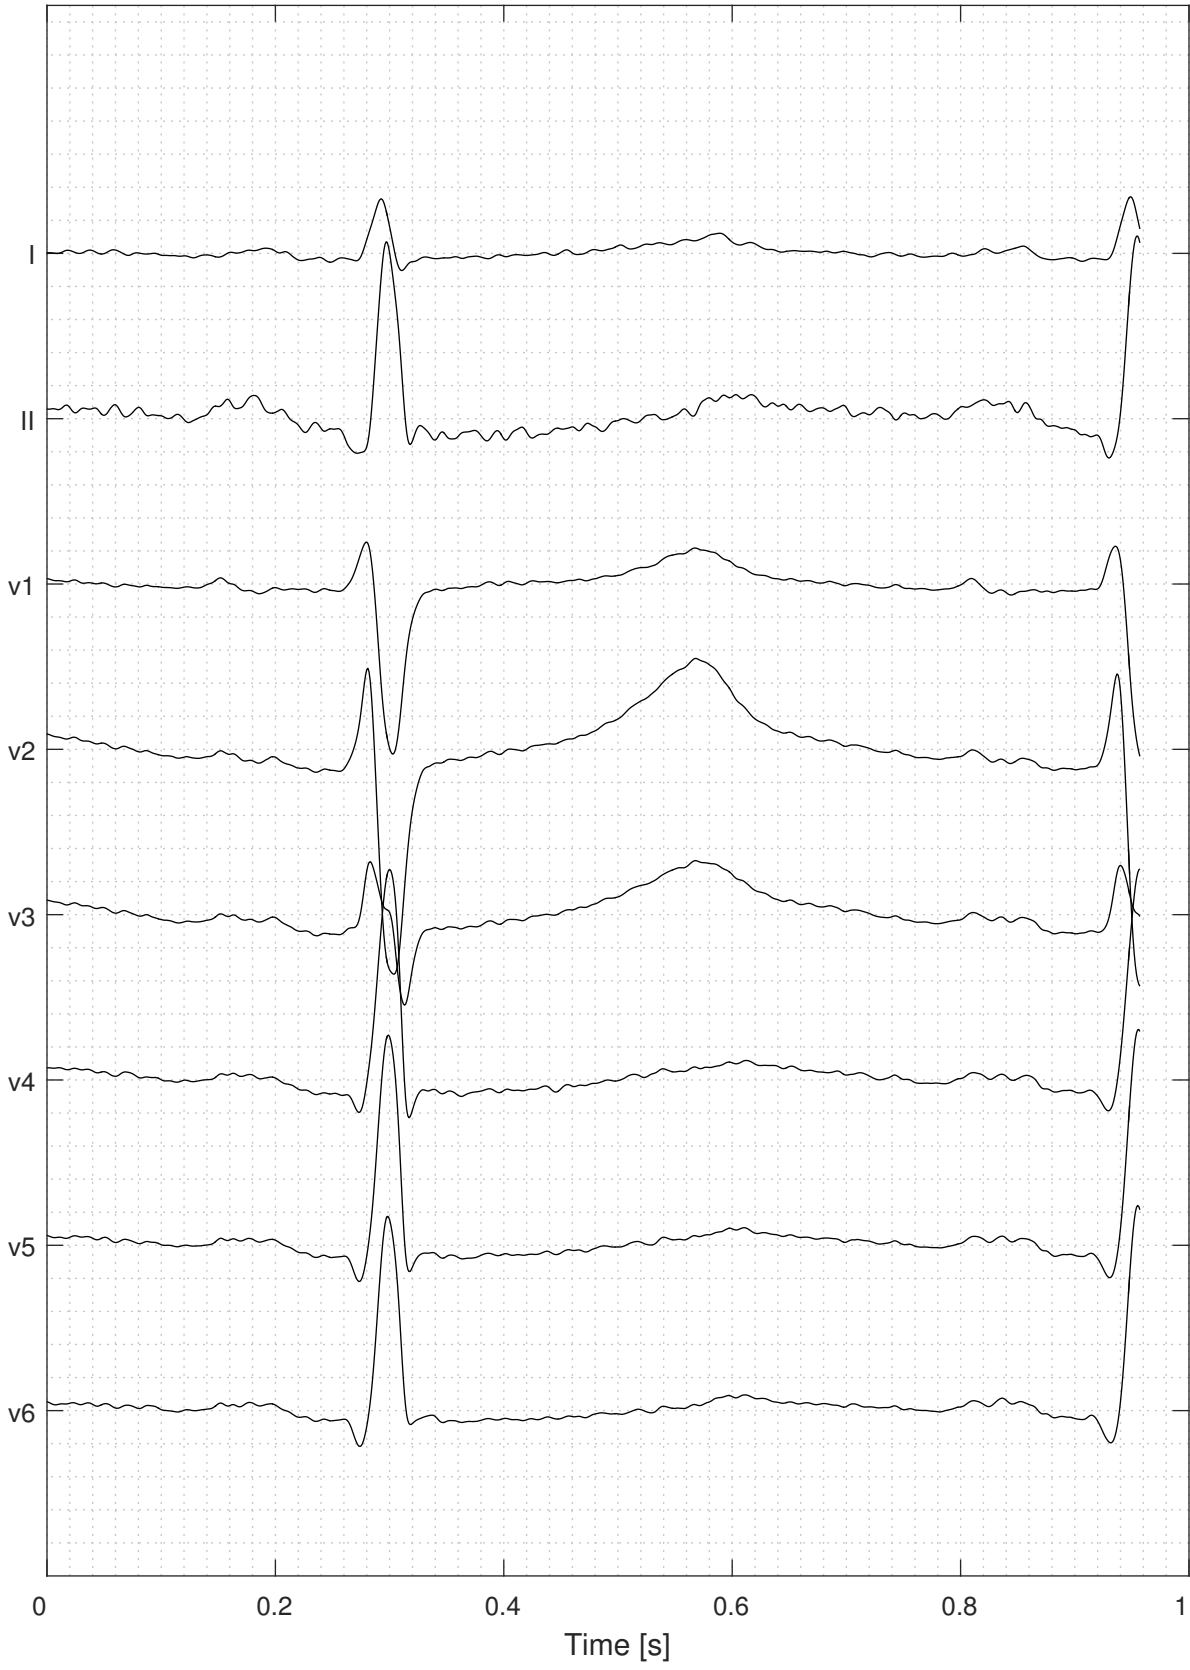

Mid RR, Complex #: 151

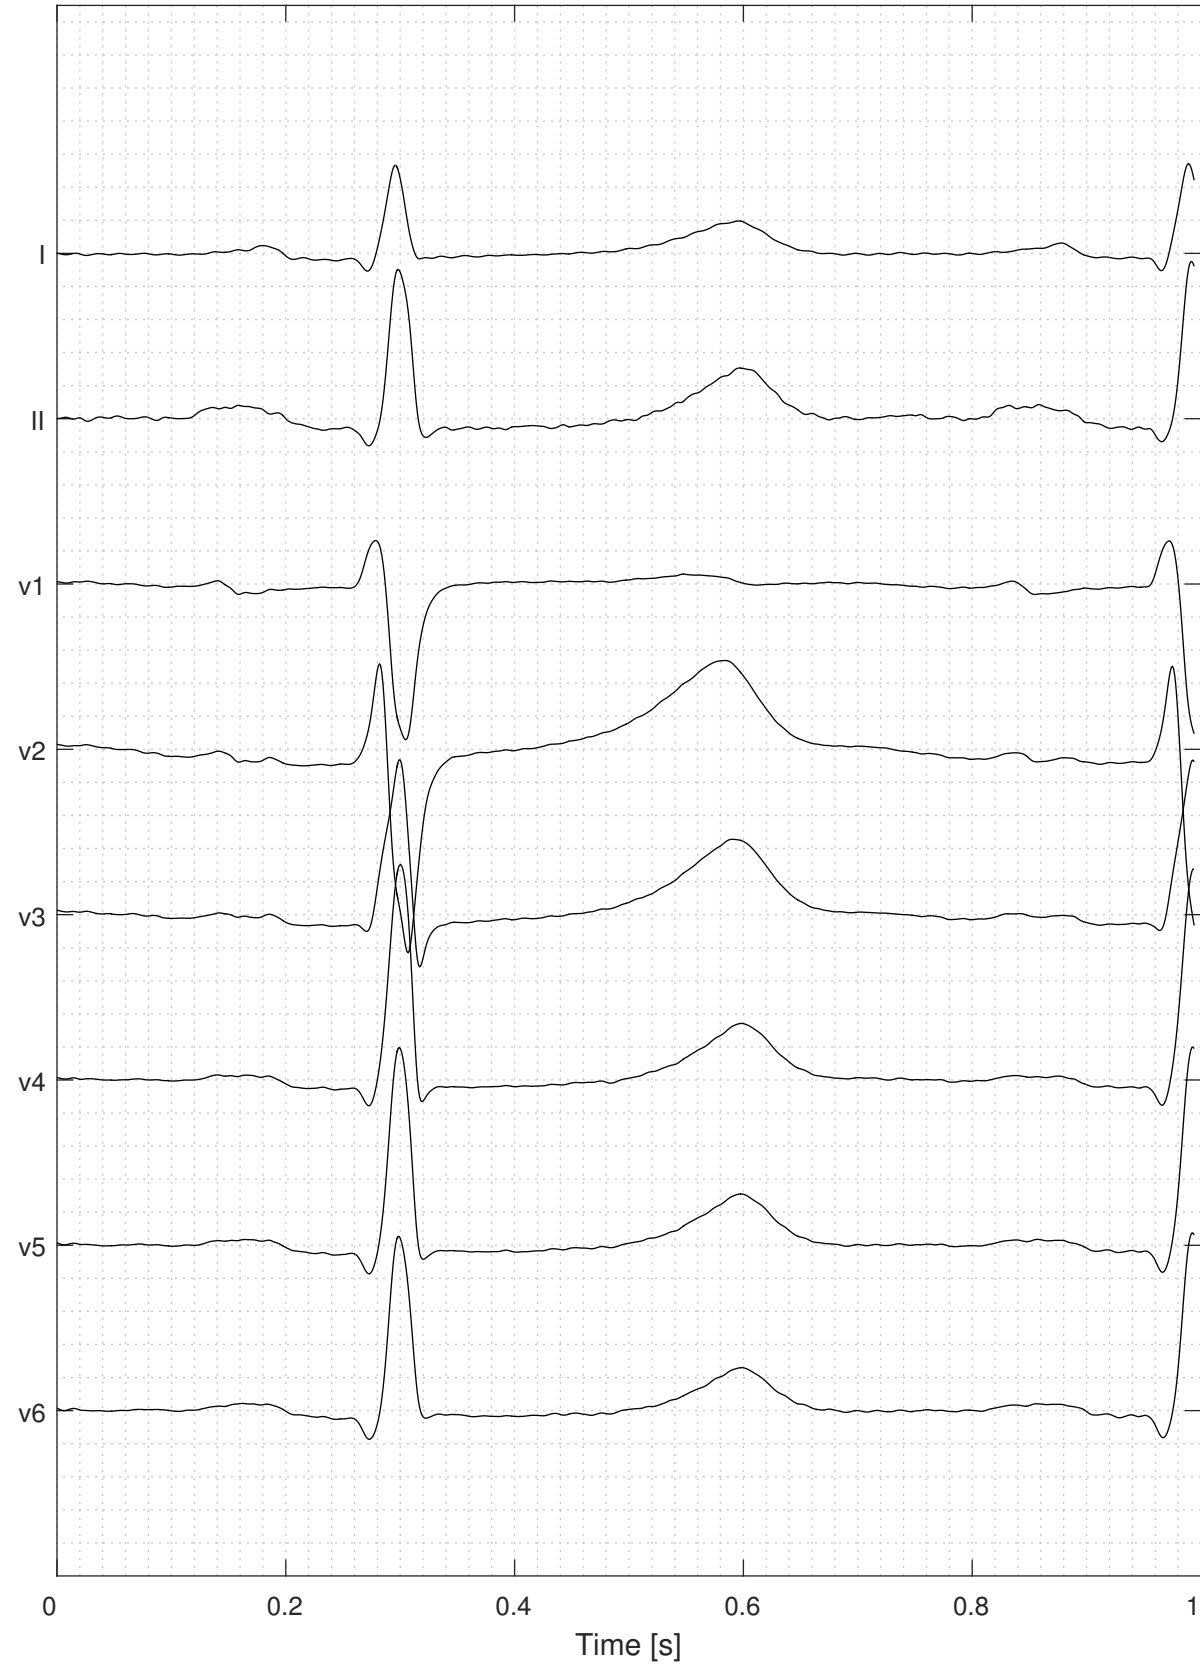

High RR, Complex #: 41

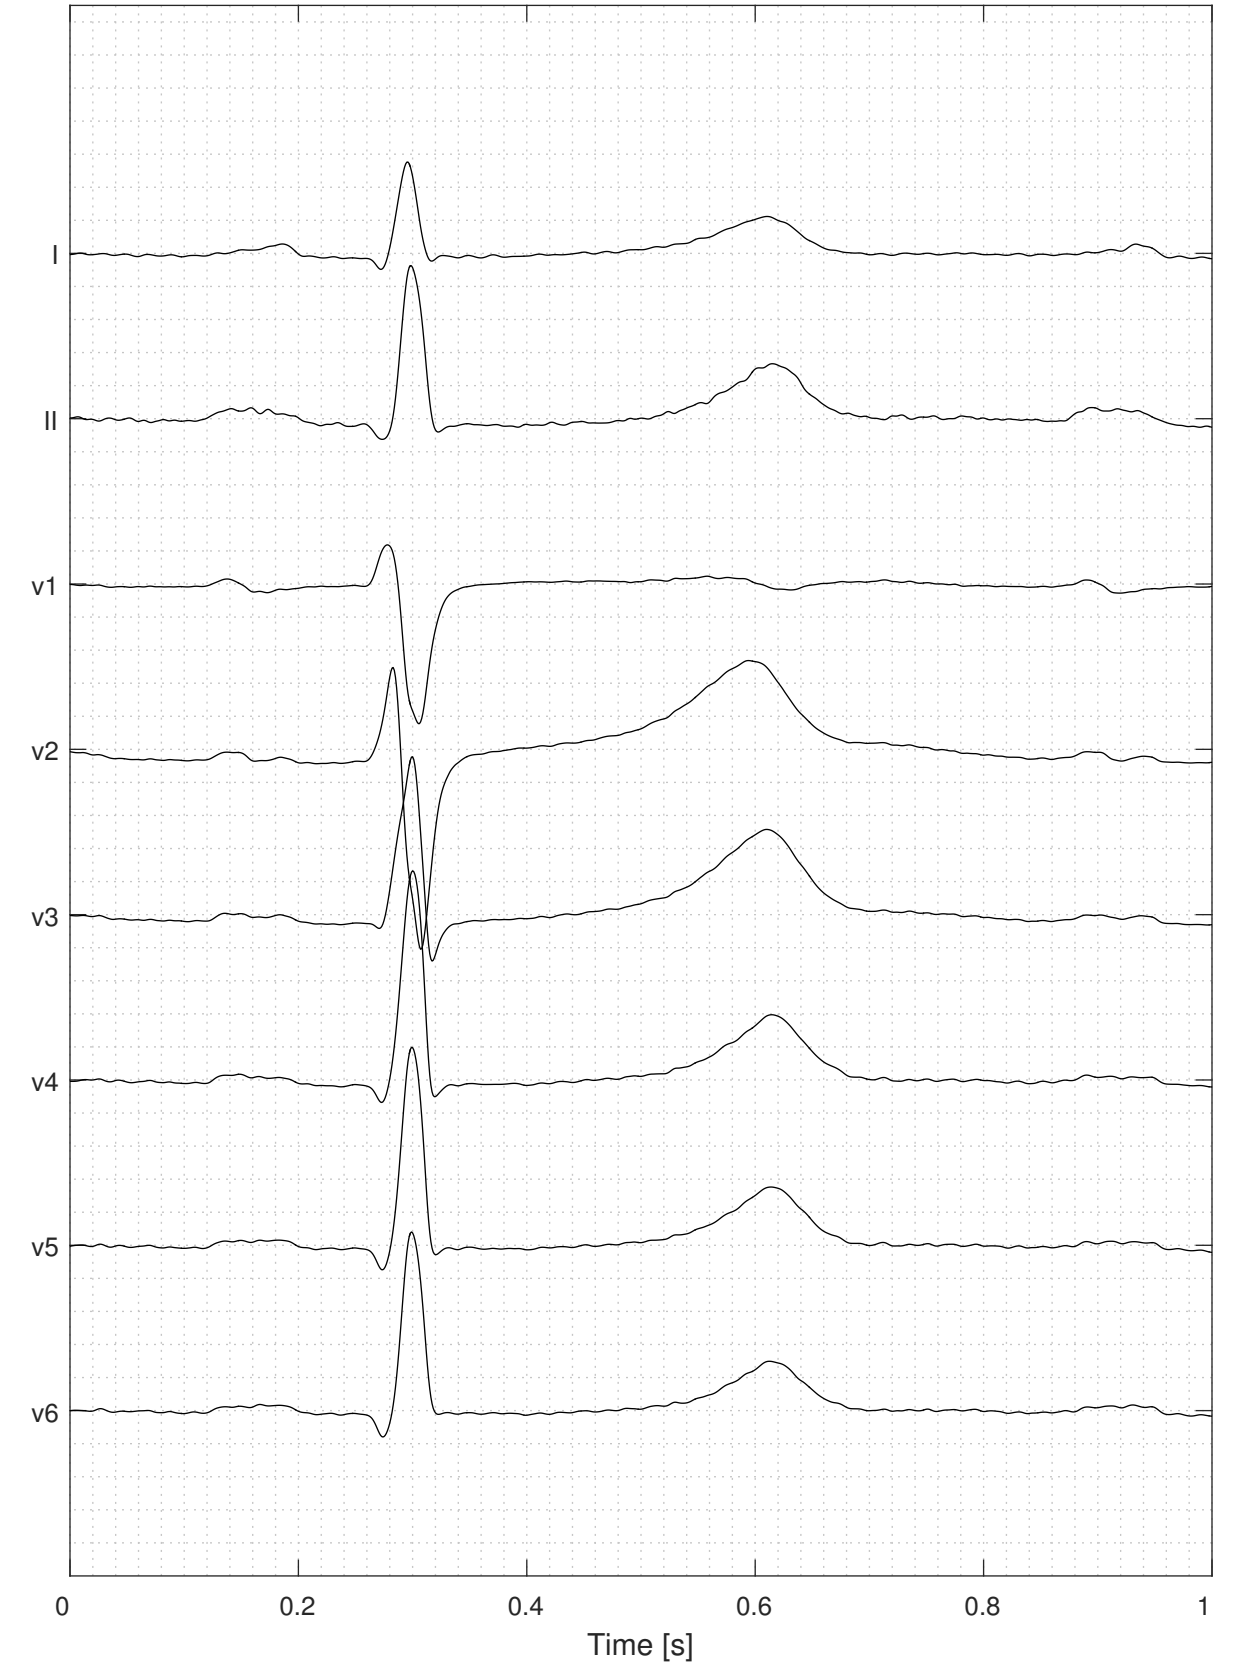

Patient 7

Low RR, Complex #: 235

Mid RR, Complex #: 178

High RR, Complex #: 70

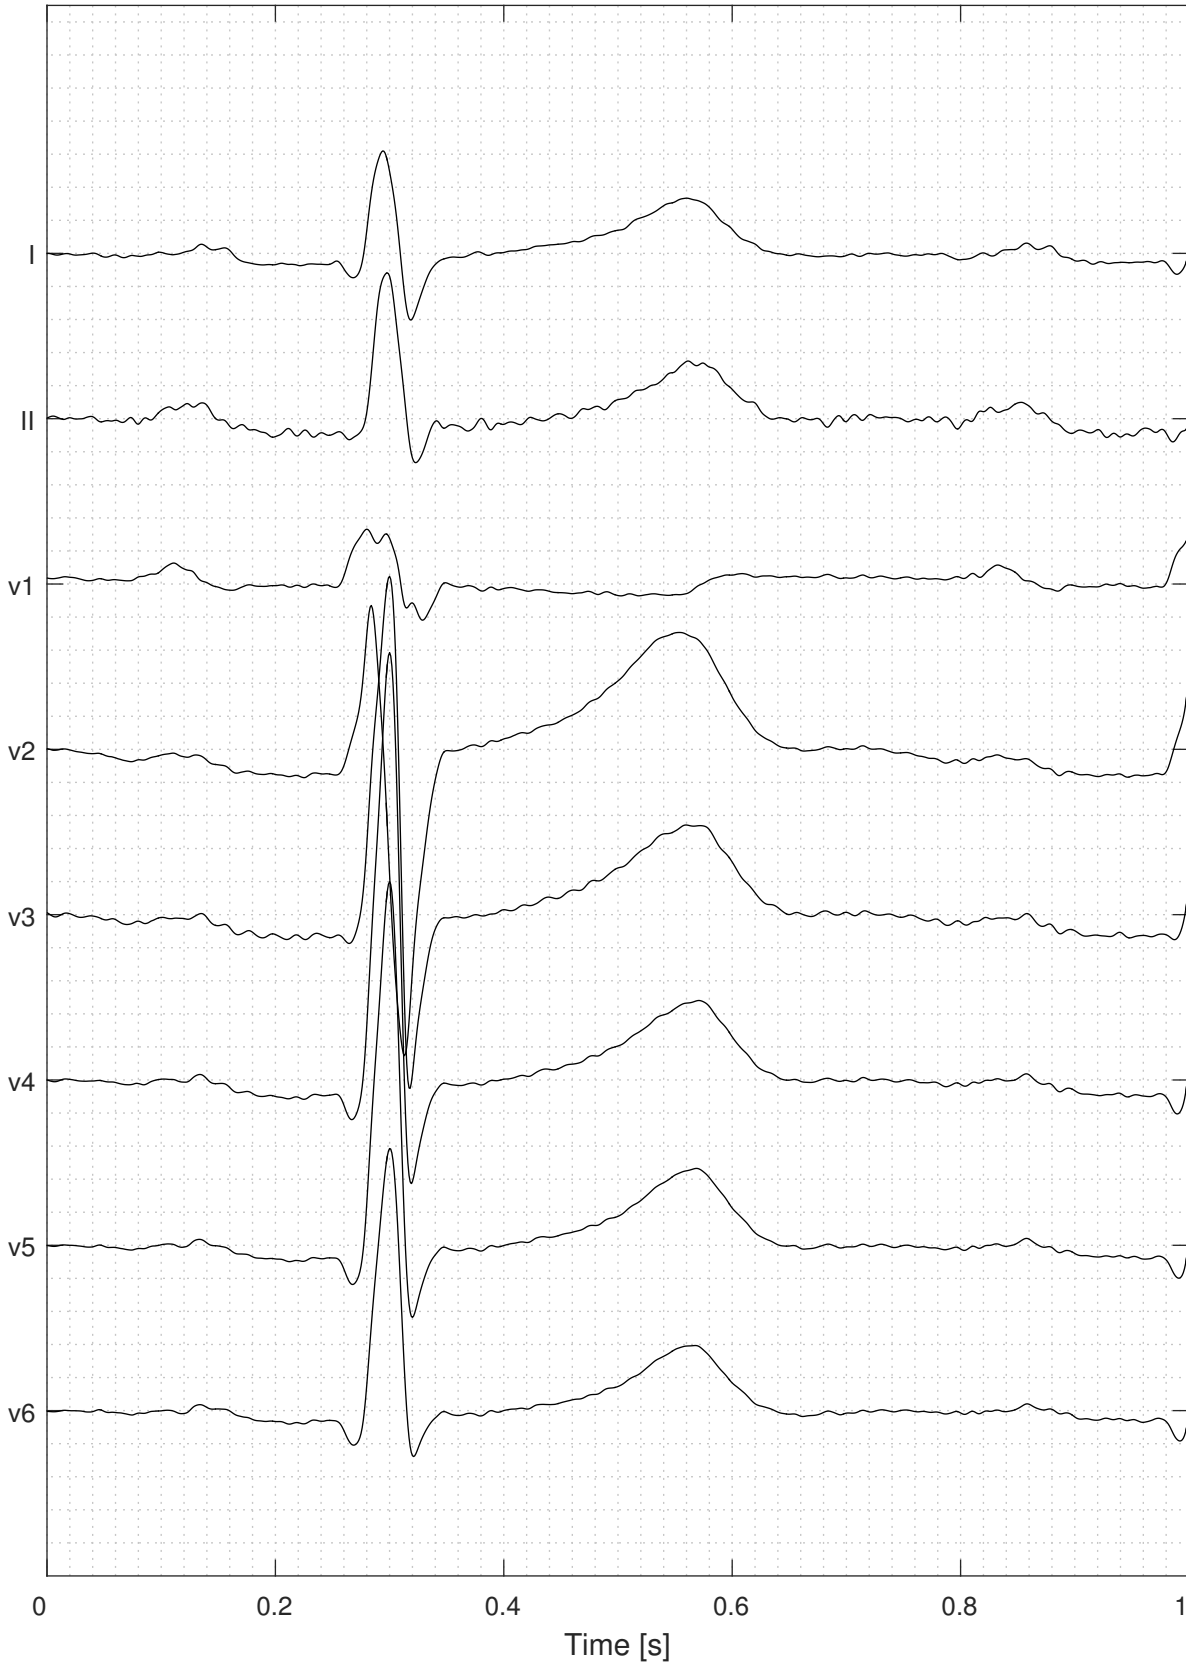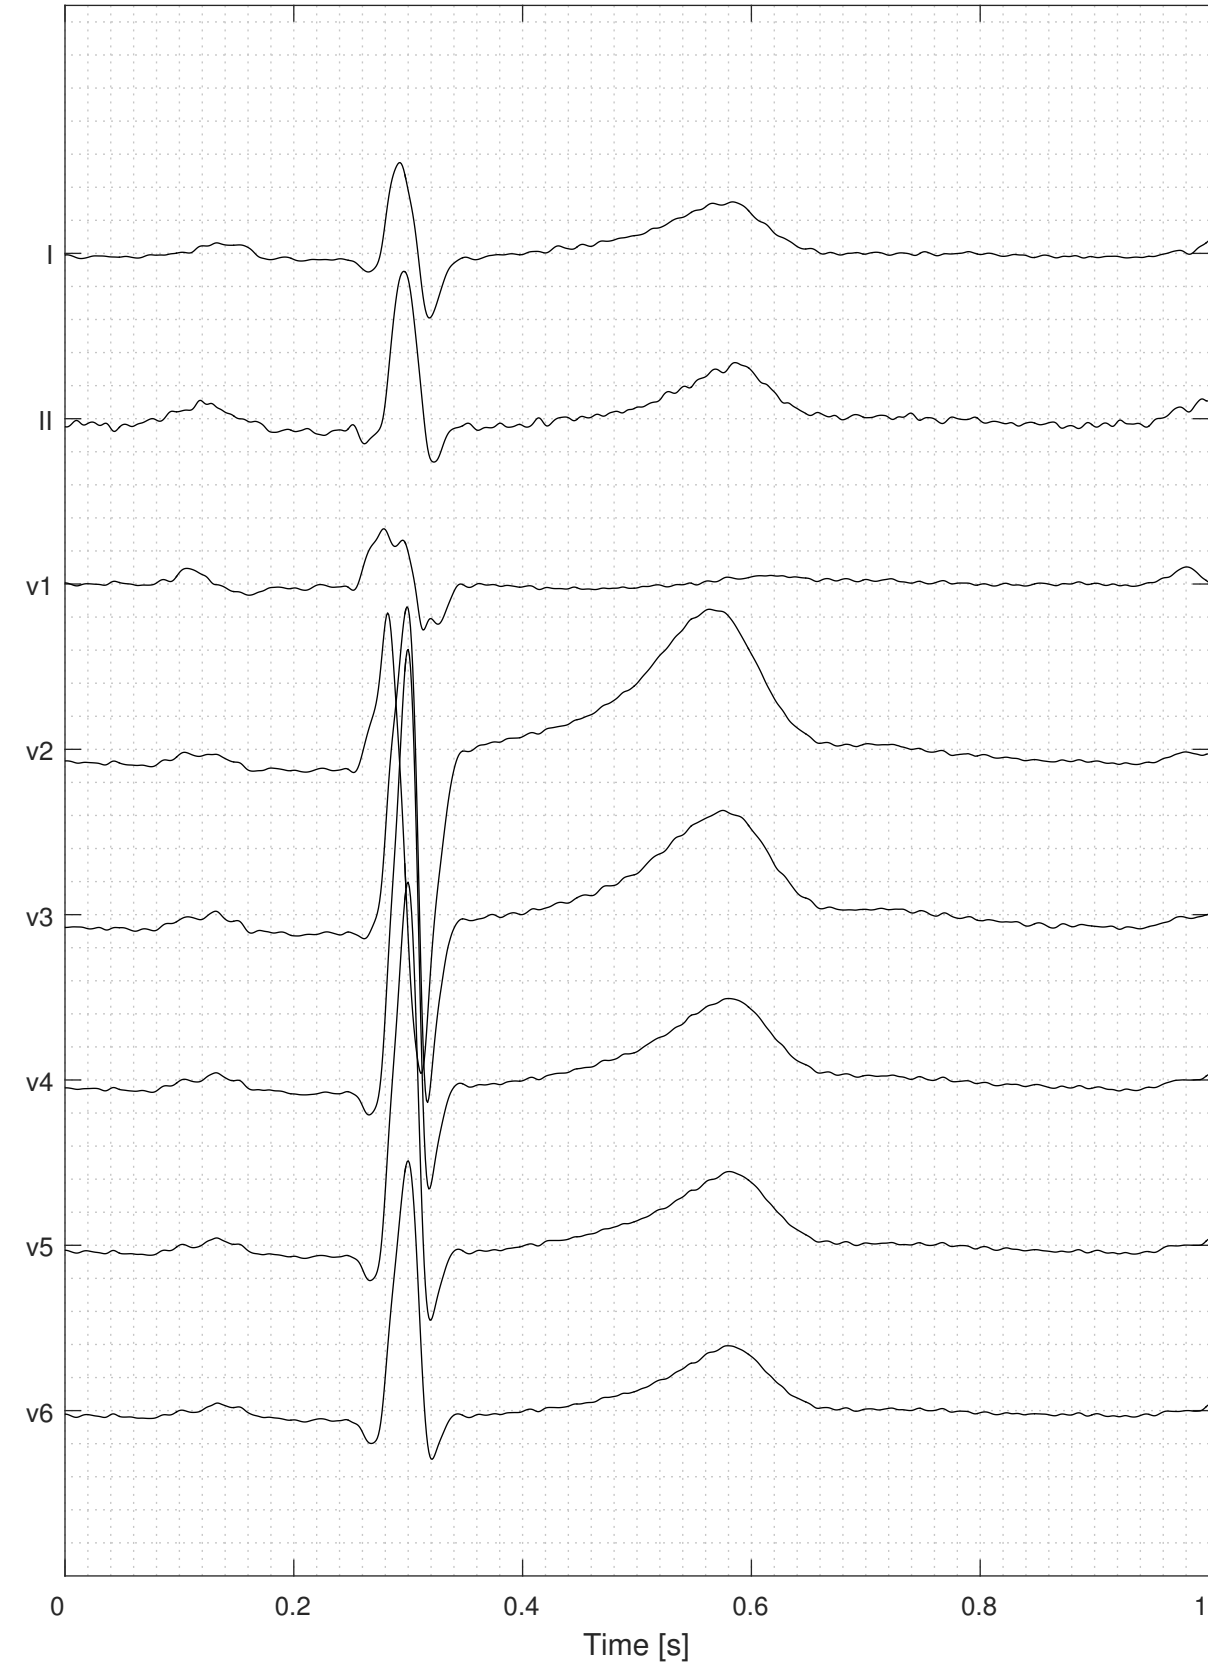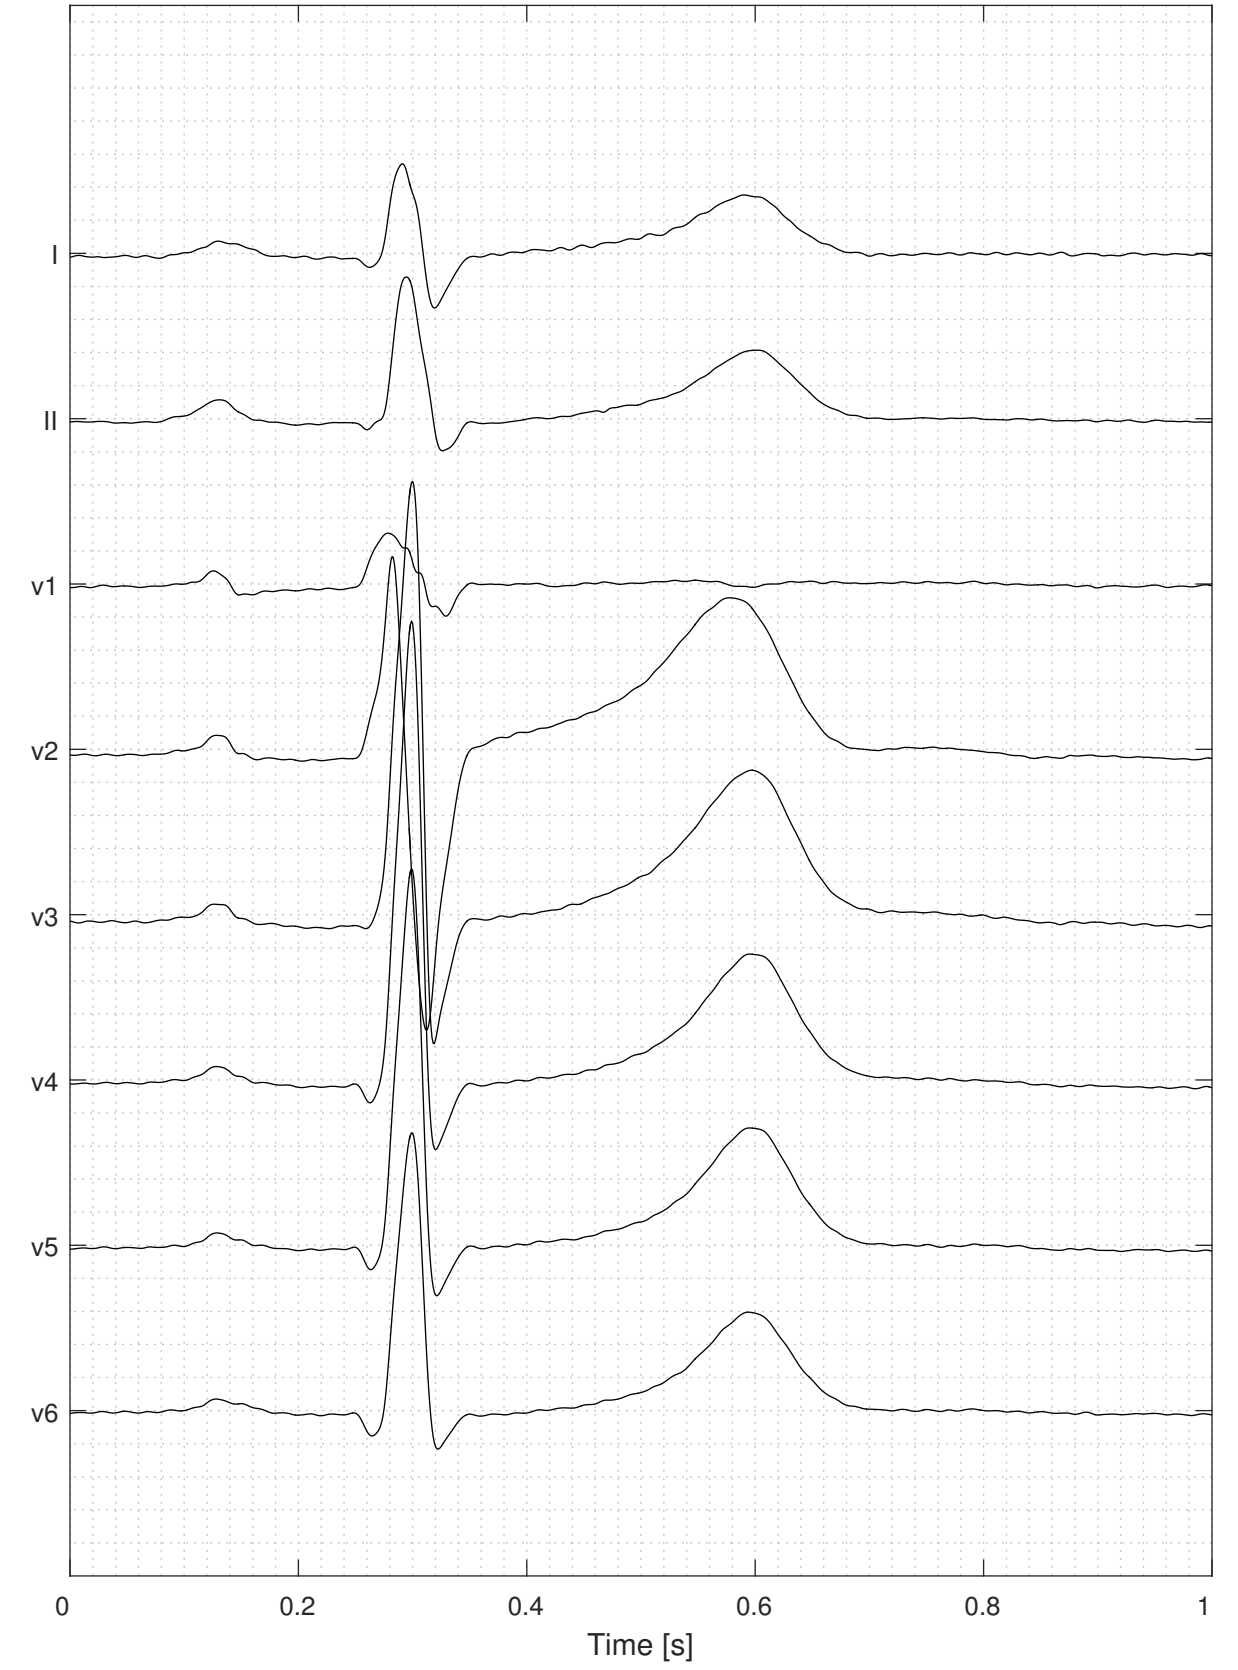

Patient 8

Low RR, Complex #: 166

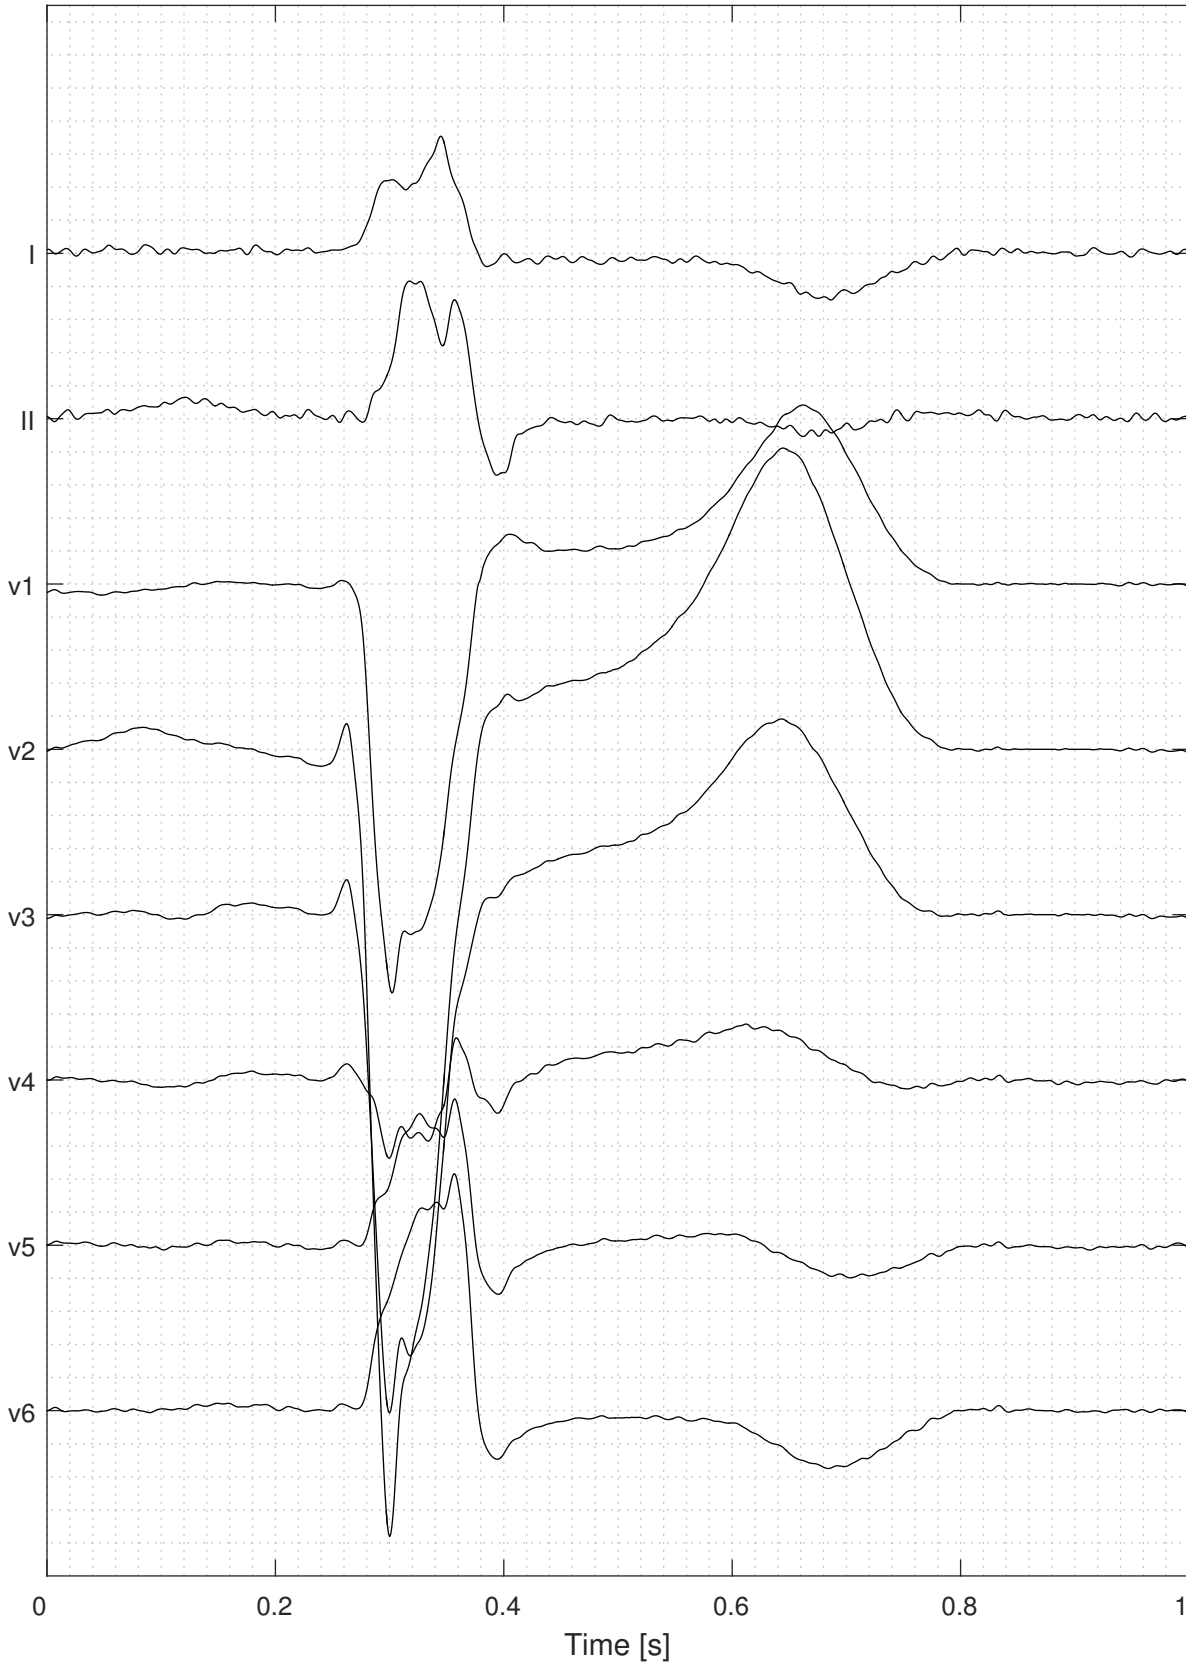

Mid RR, Complex #: 62

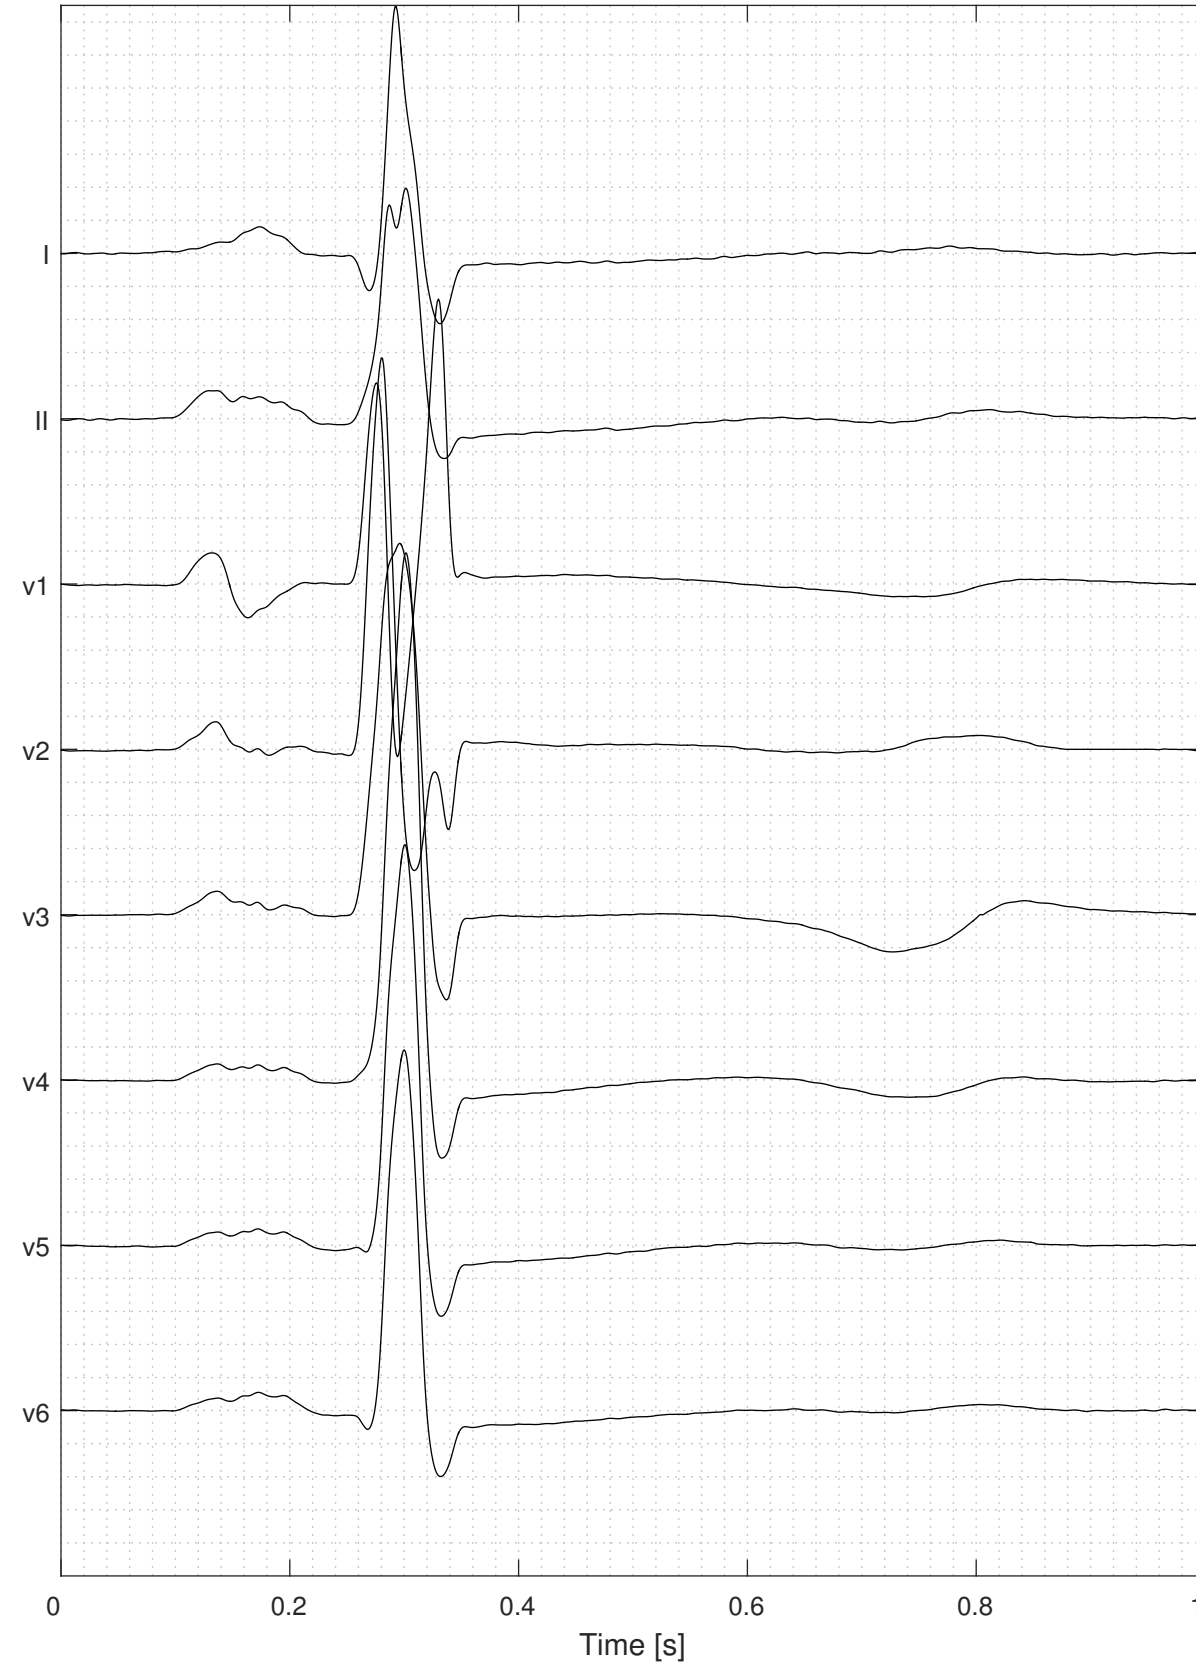

High RR, Complex #: 172

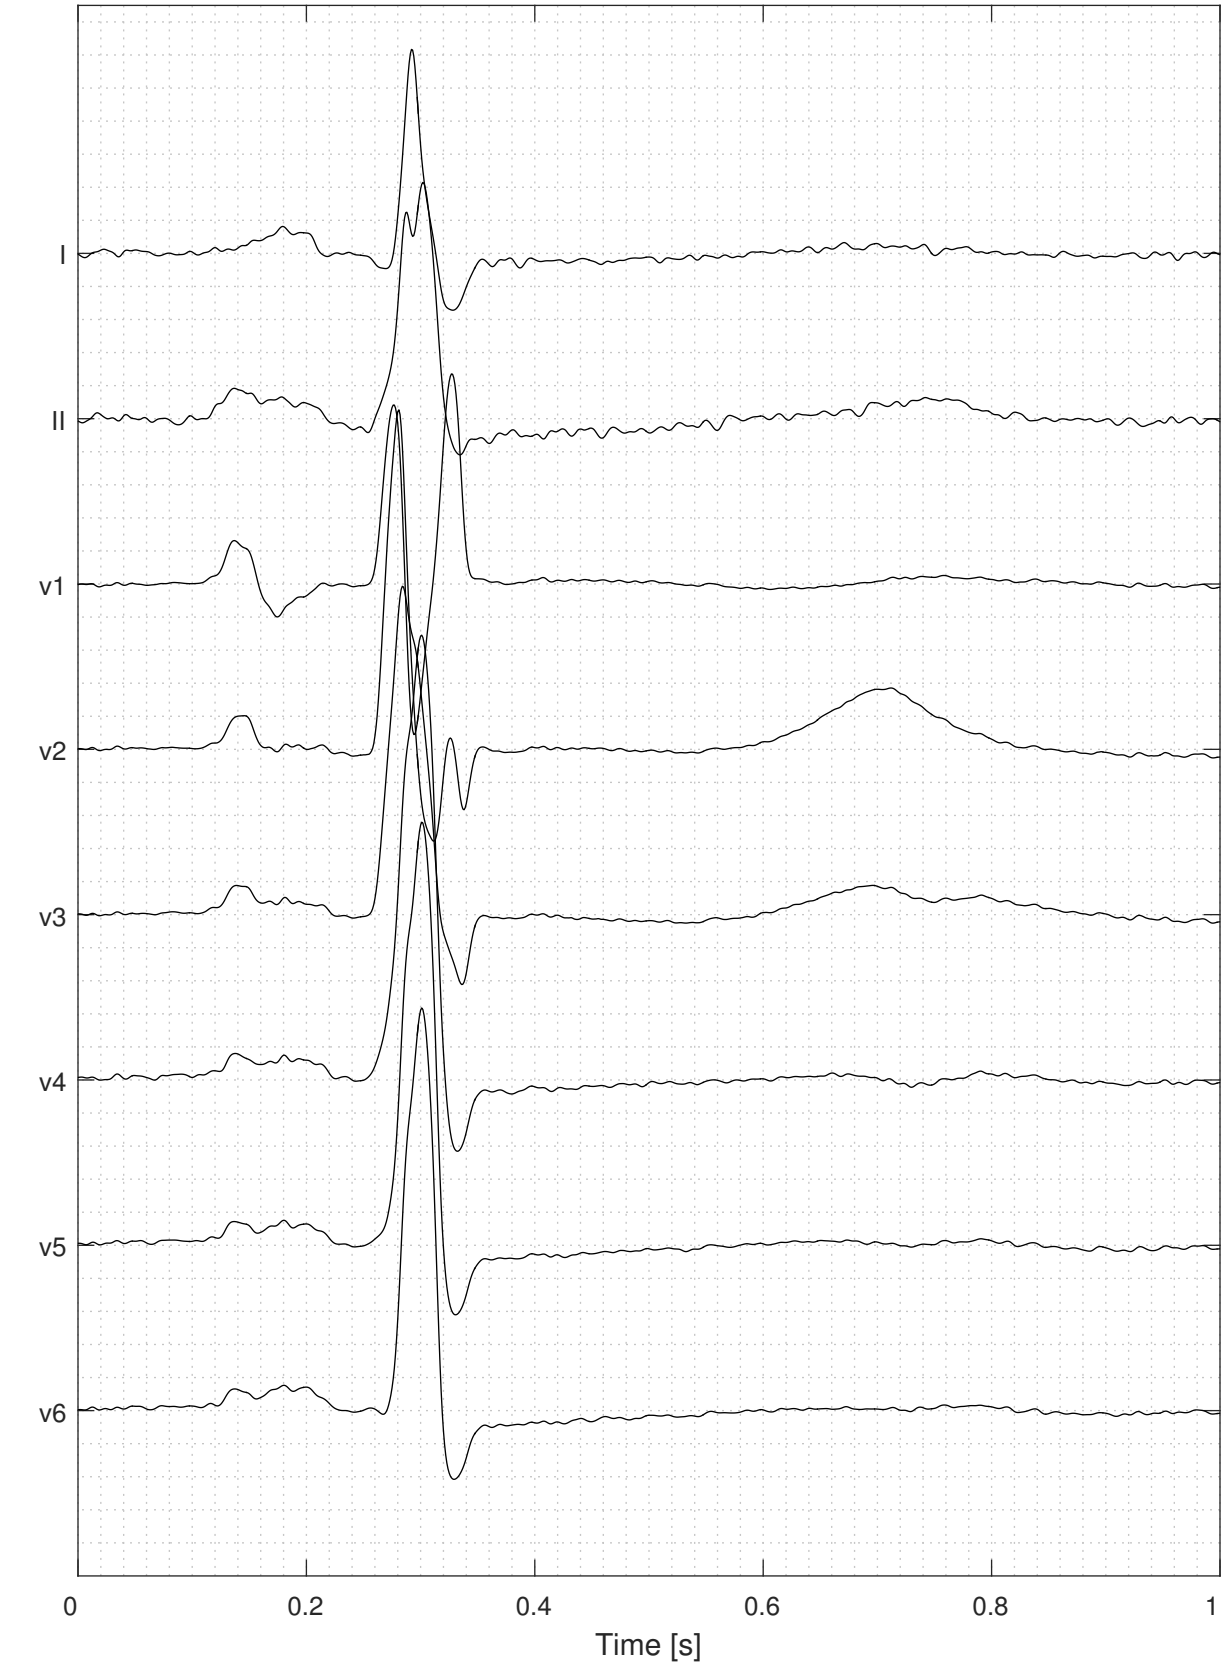



Patient 9

Low RR, Complex #: 322

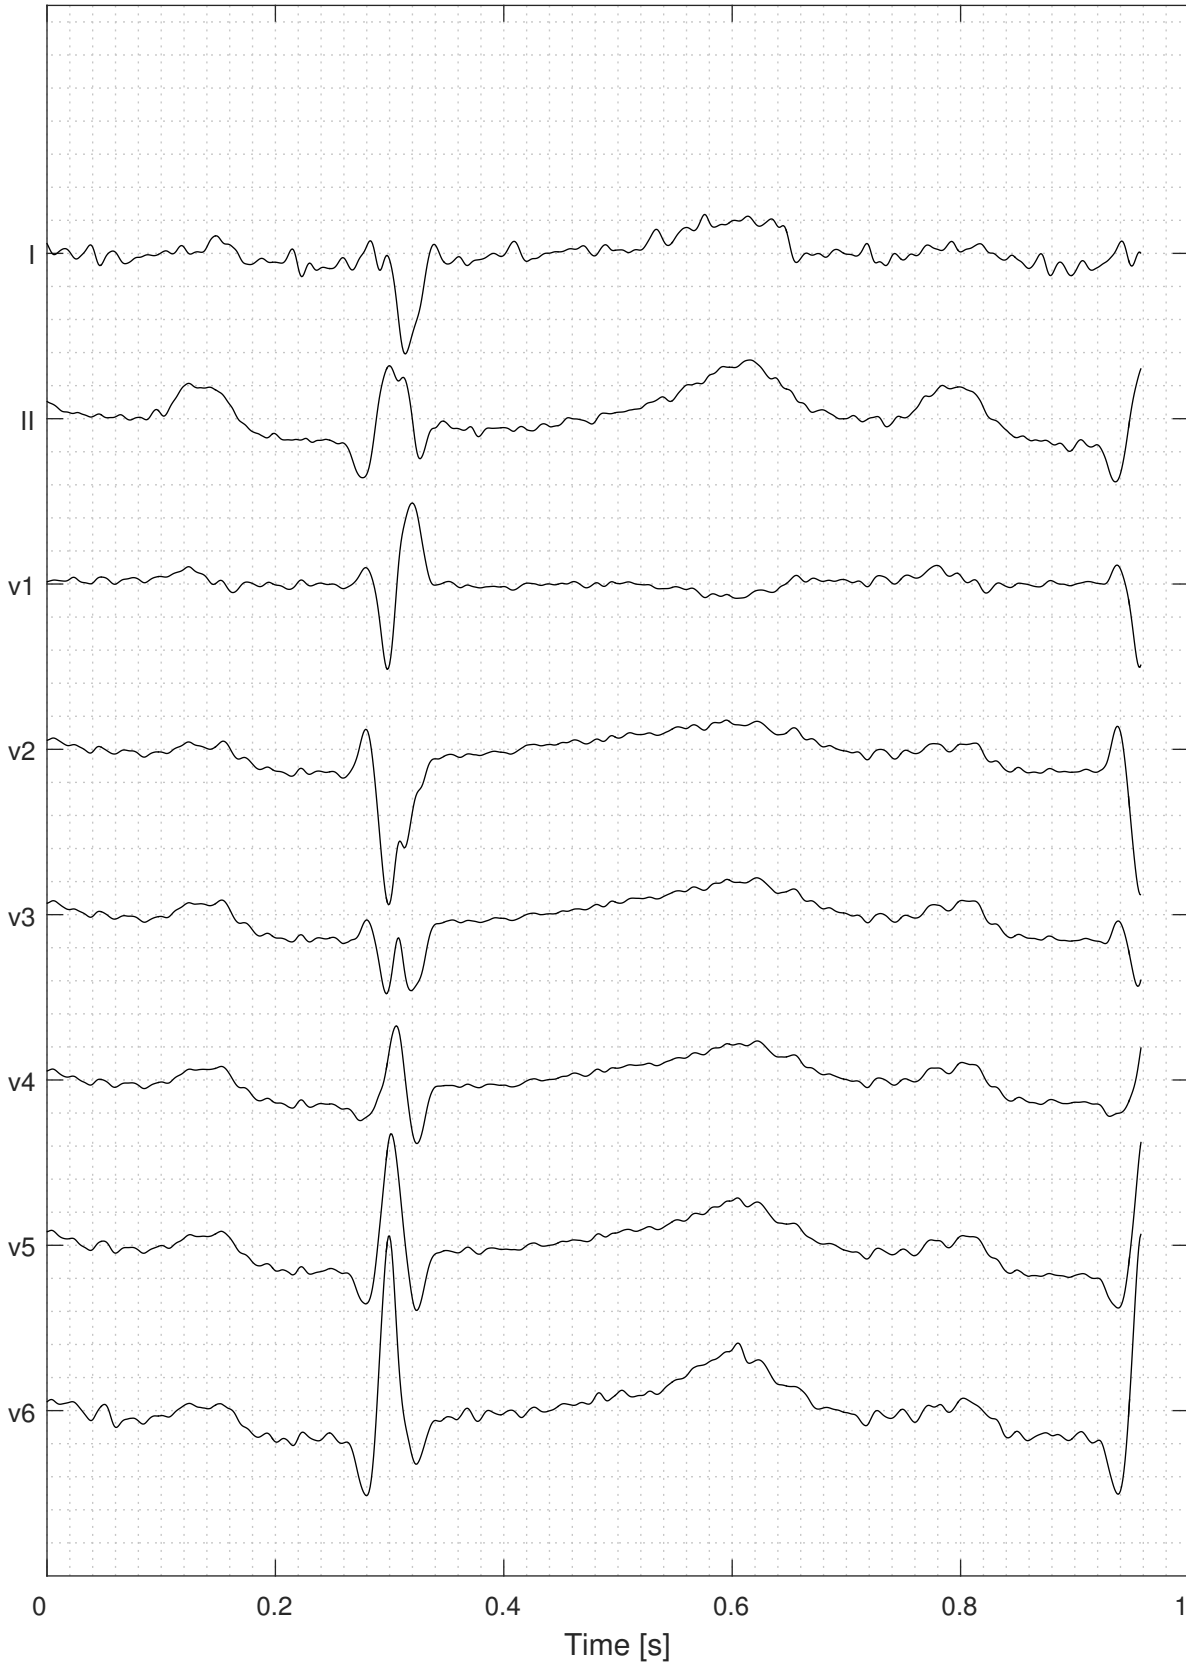

Mid RR, Complex #: 319

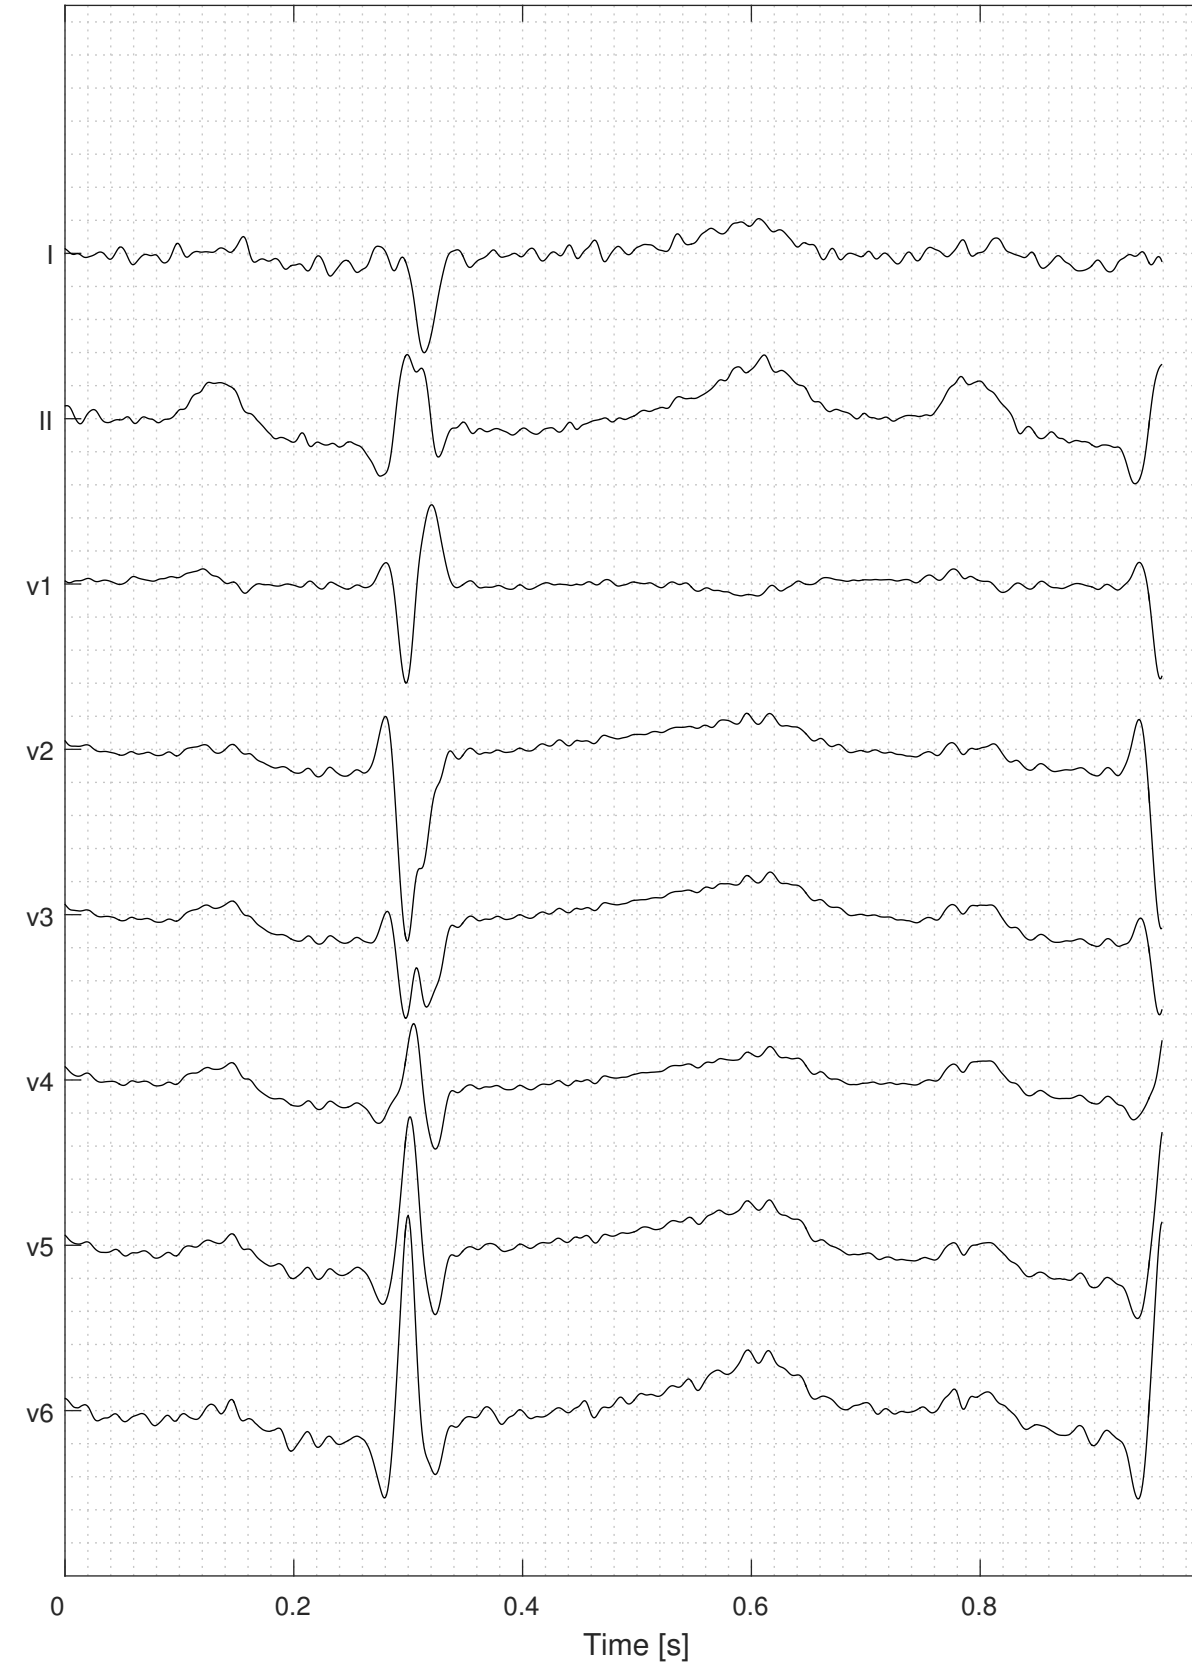

High RR, Complex #: 24

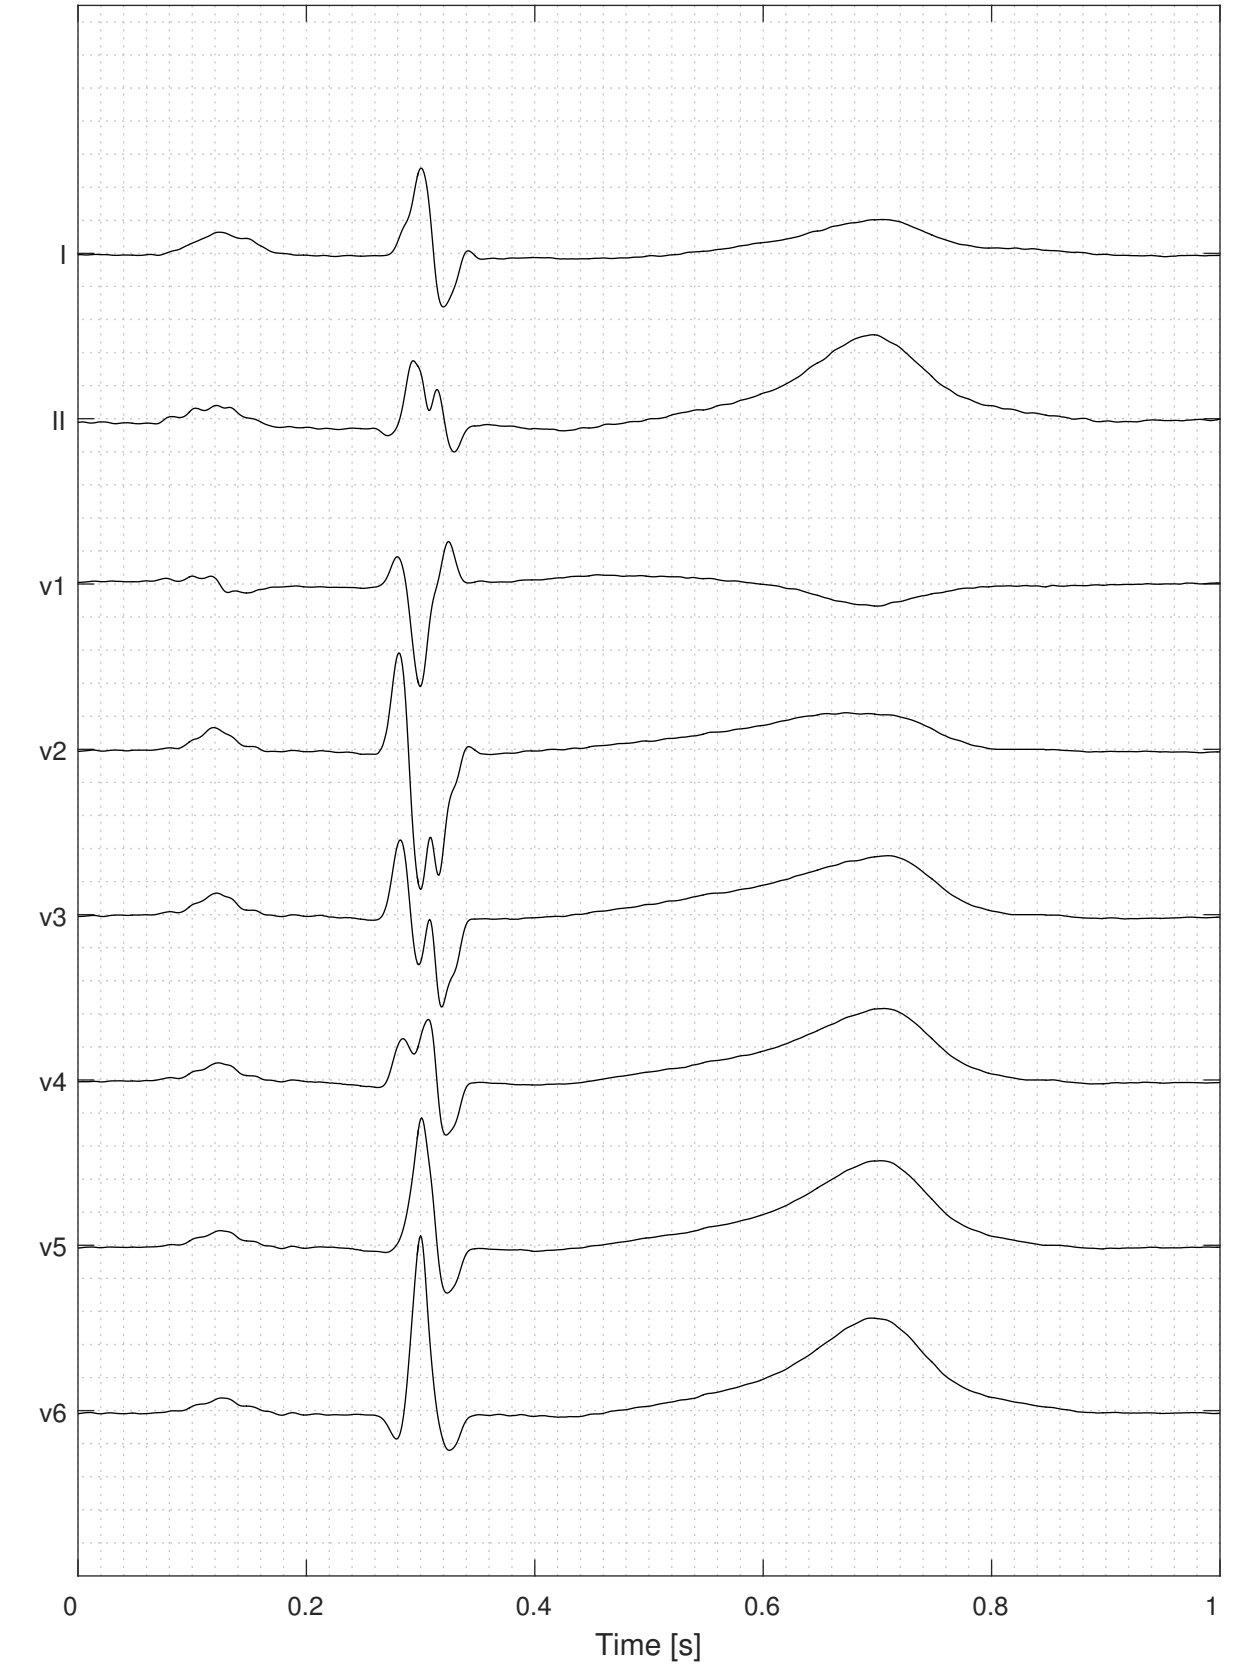

Patient 10

Low RR, Complex #: 156

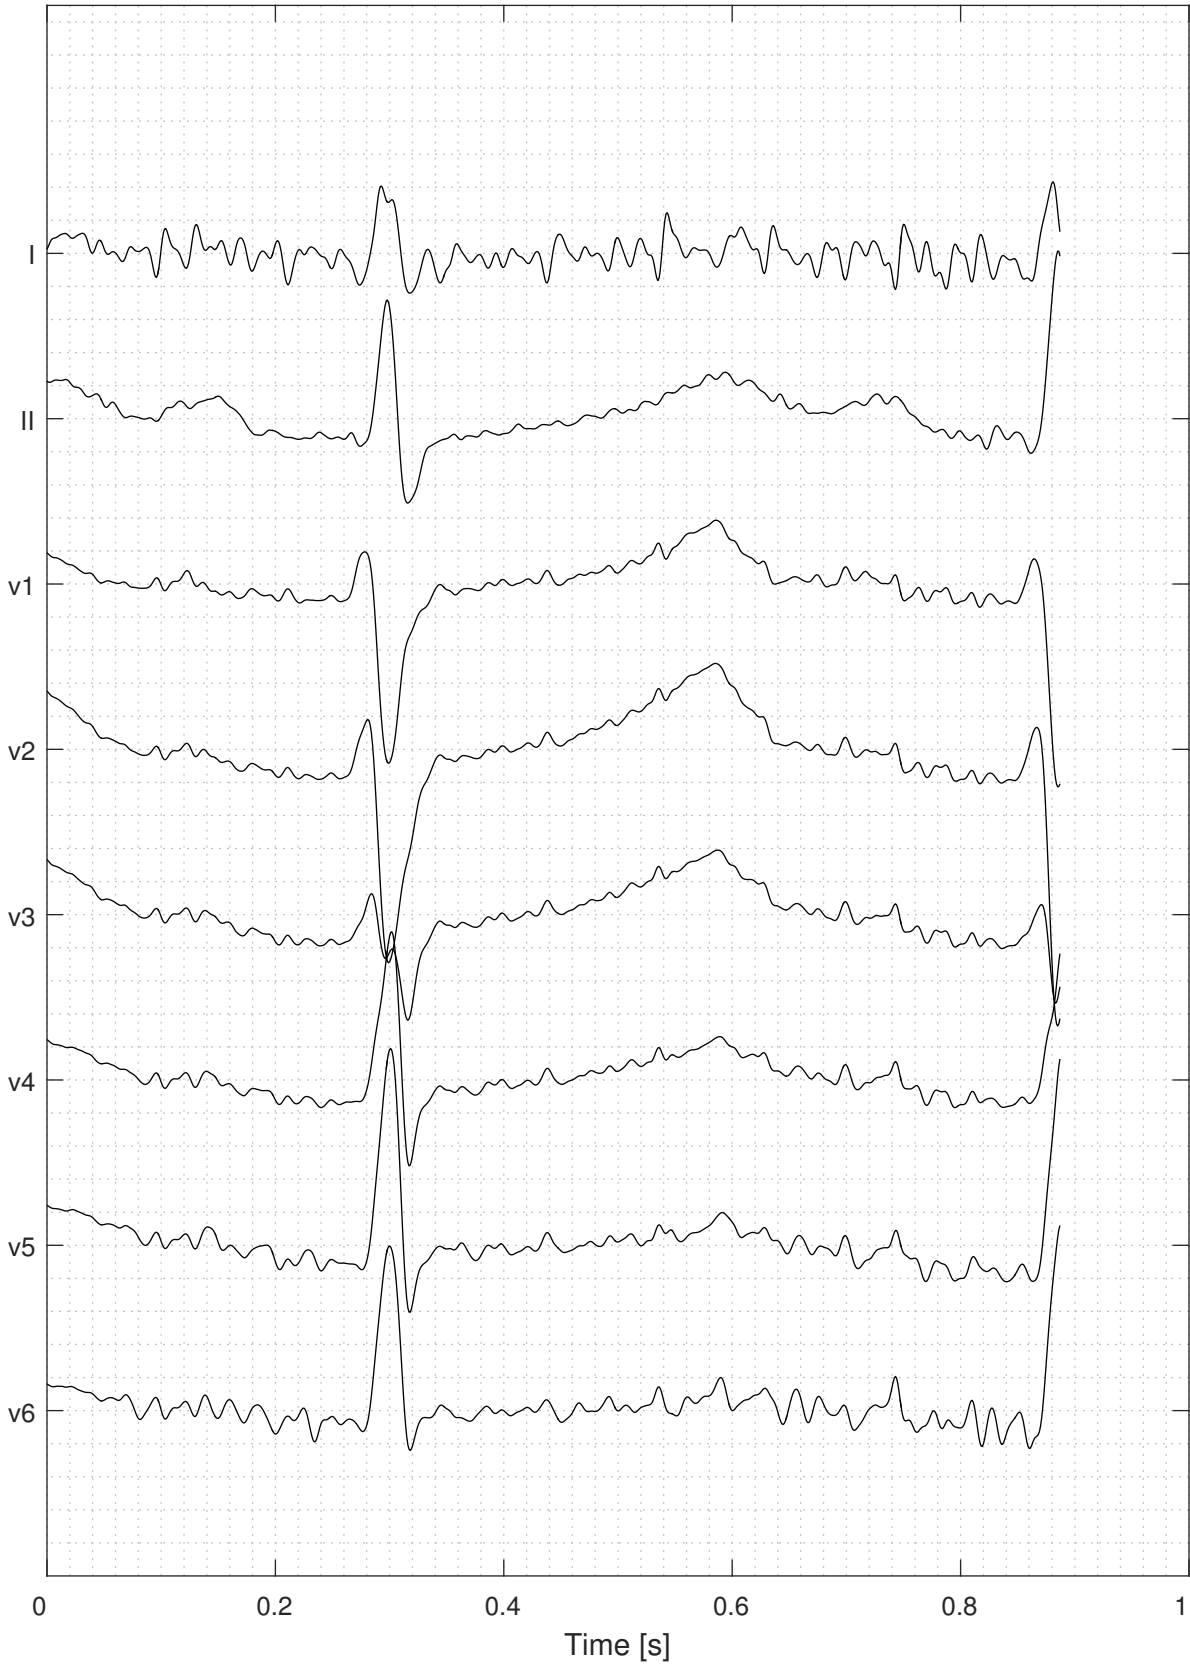

Mid RR, Complex #: 236

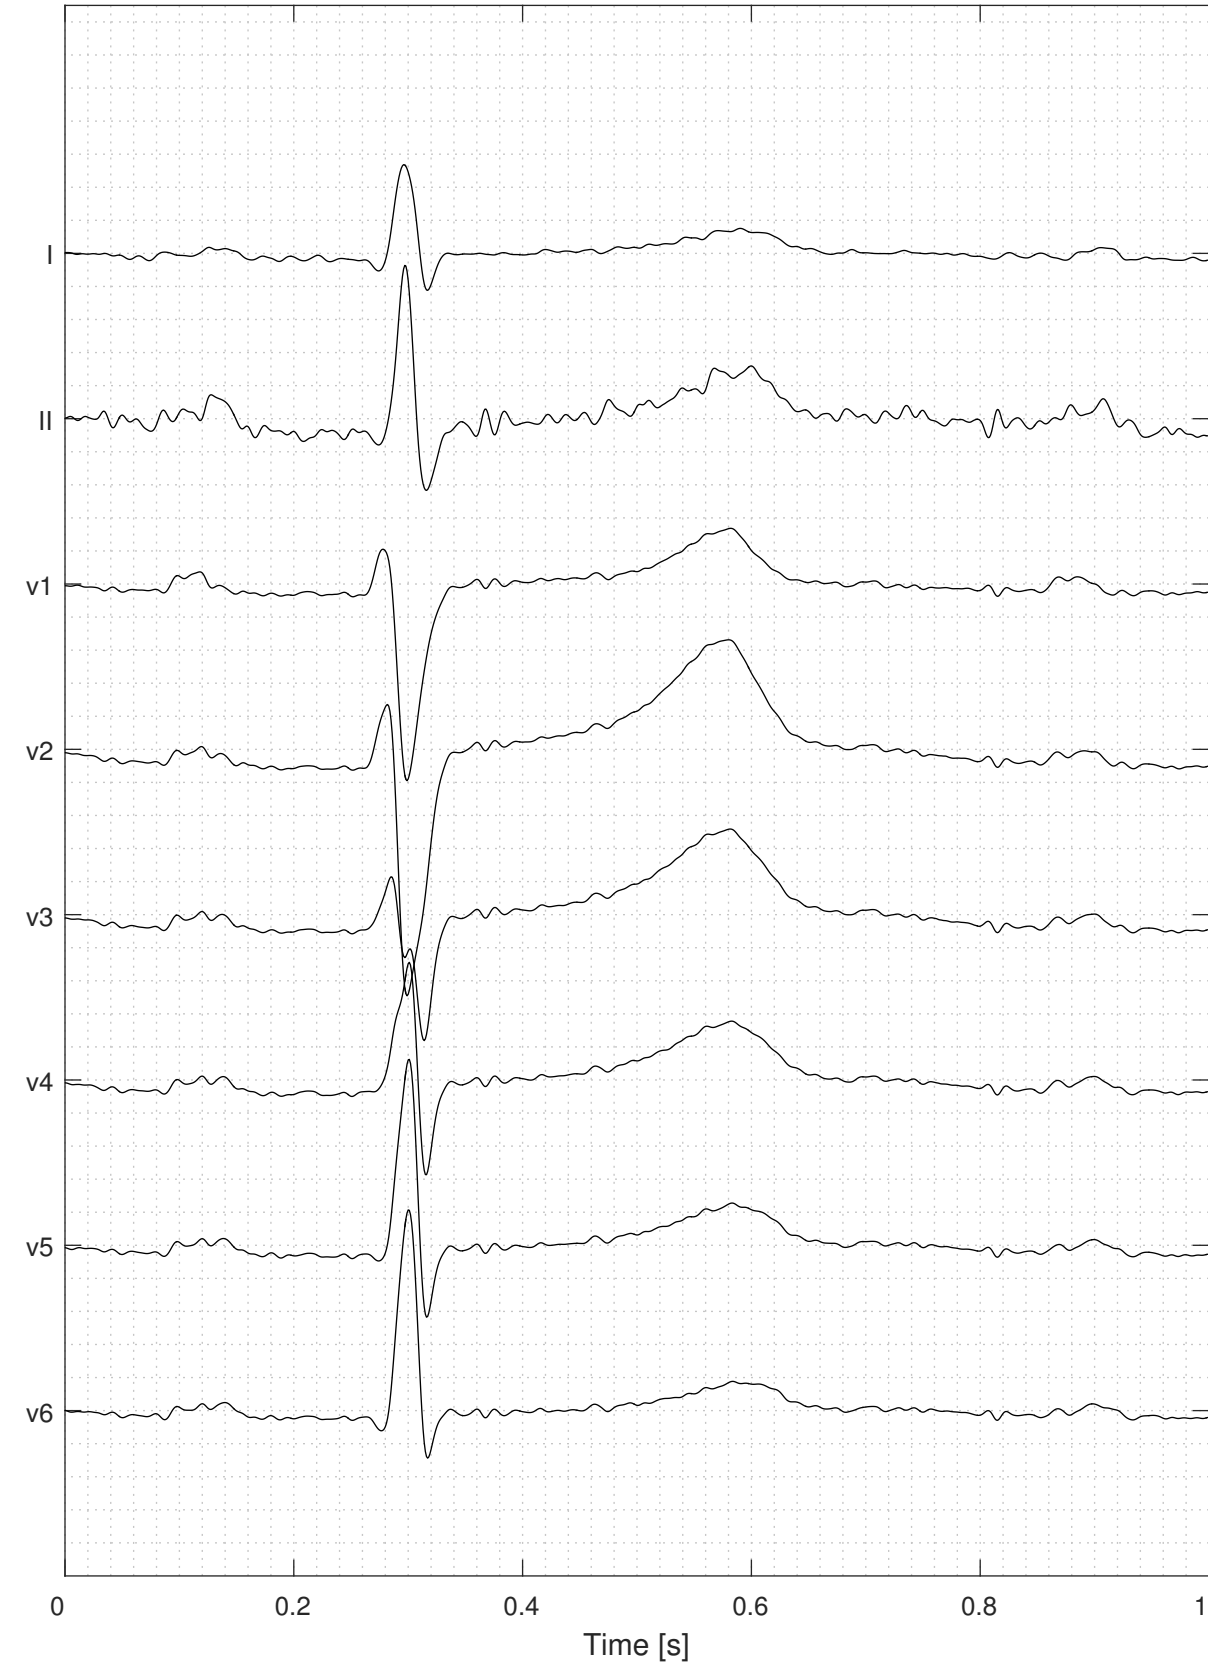

High RR, Complex #: 107

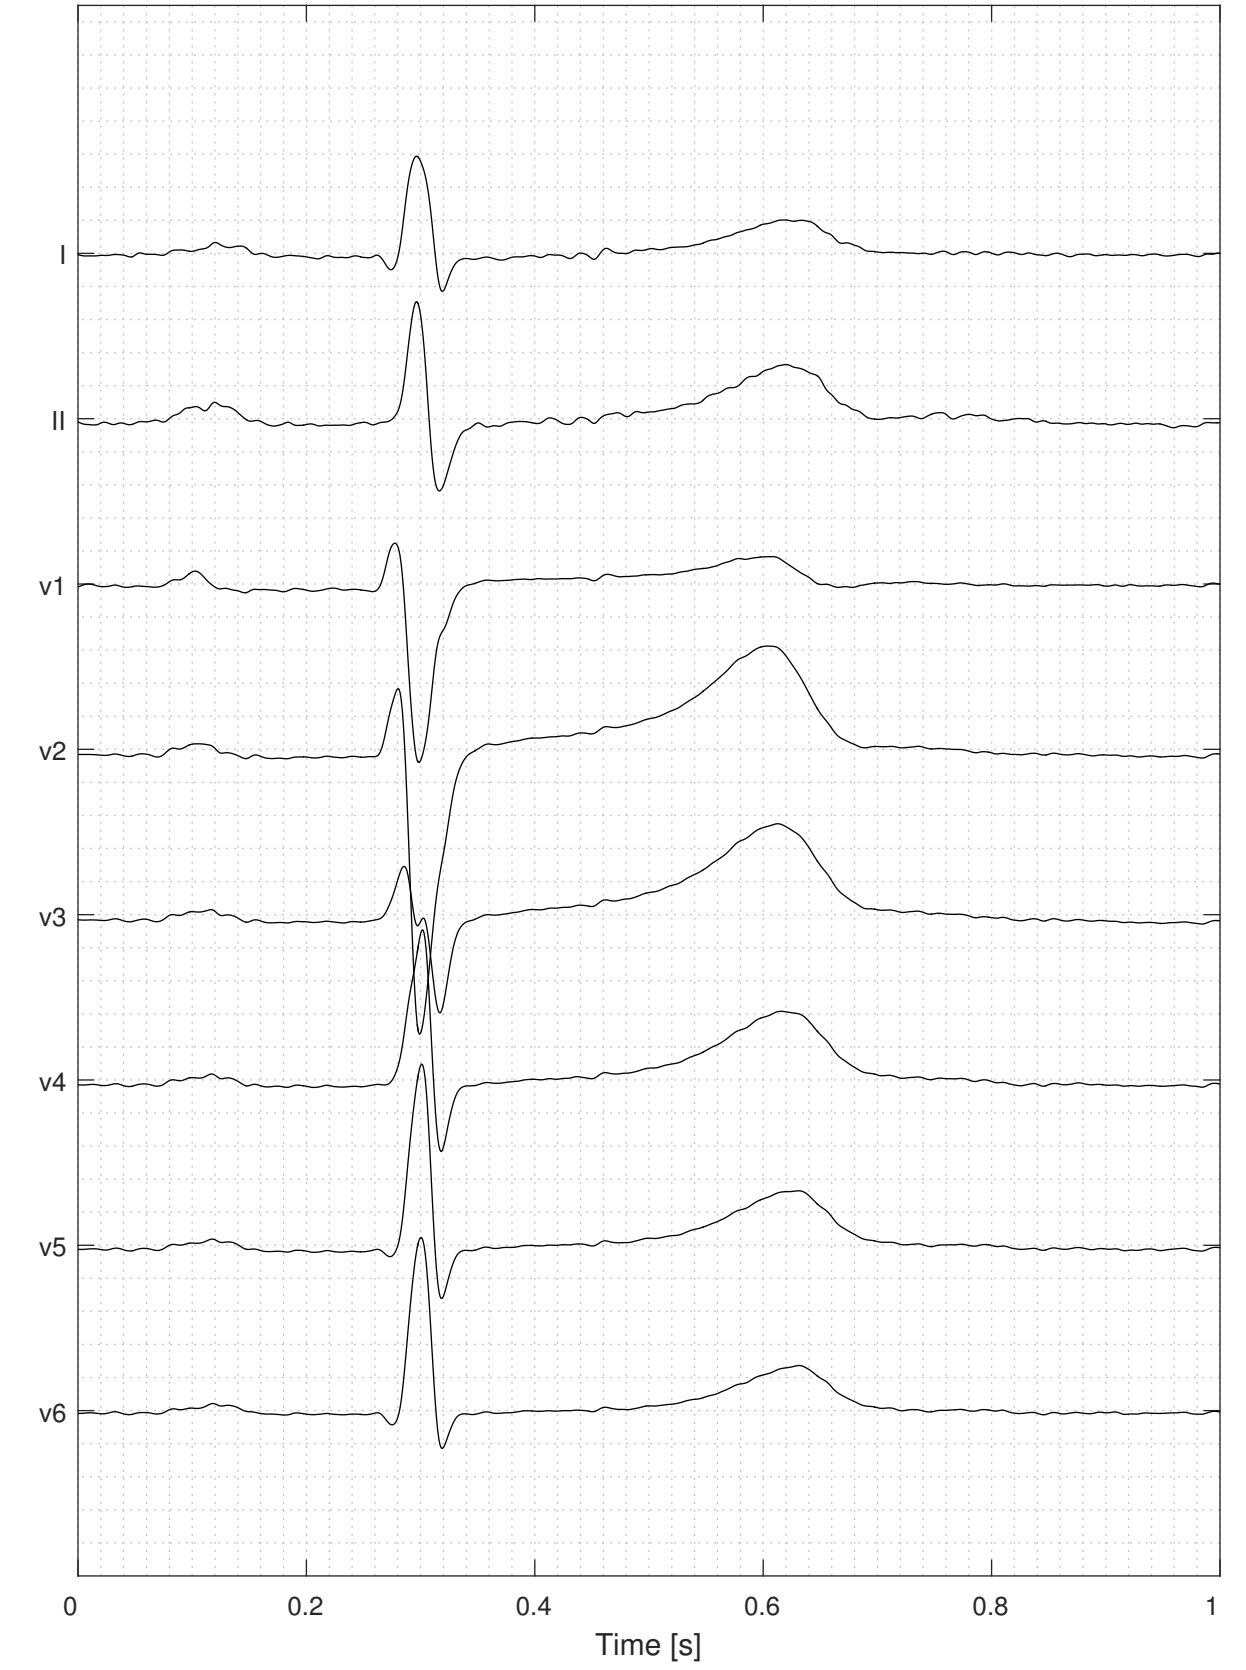

Patient 11

Low RR, Complex #: 300

Mid RR, Complex #: 91

High RR, Complex #: 176

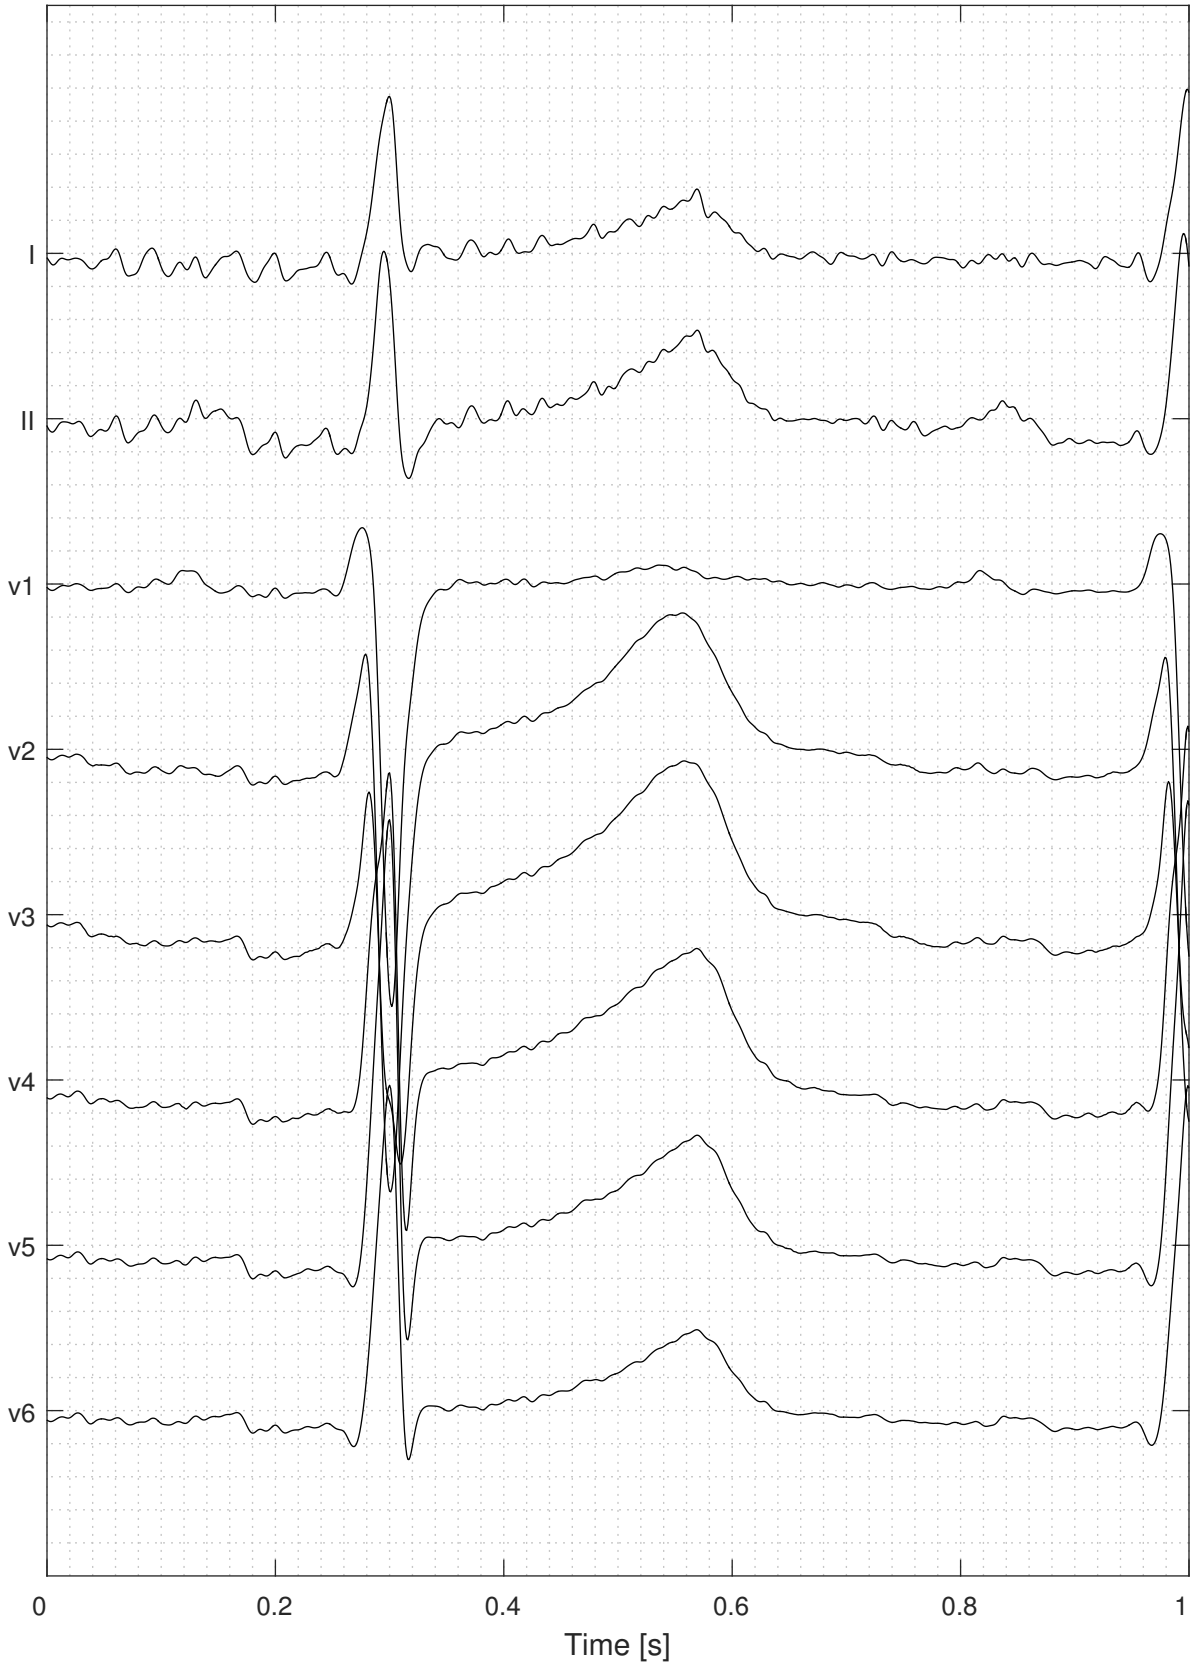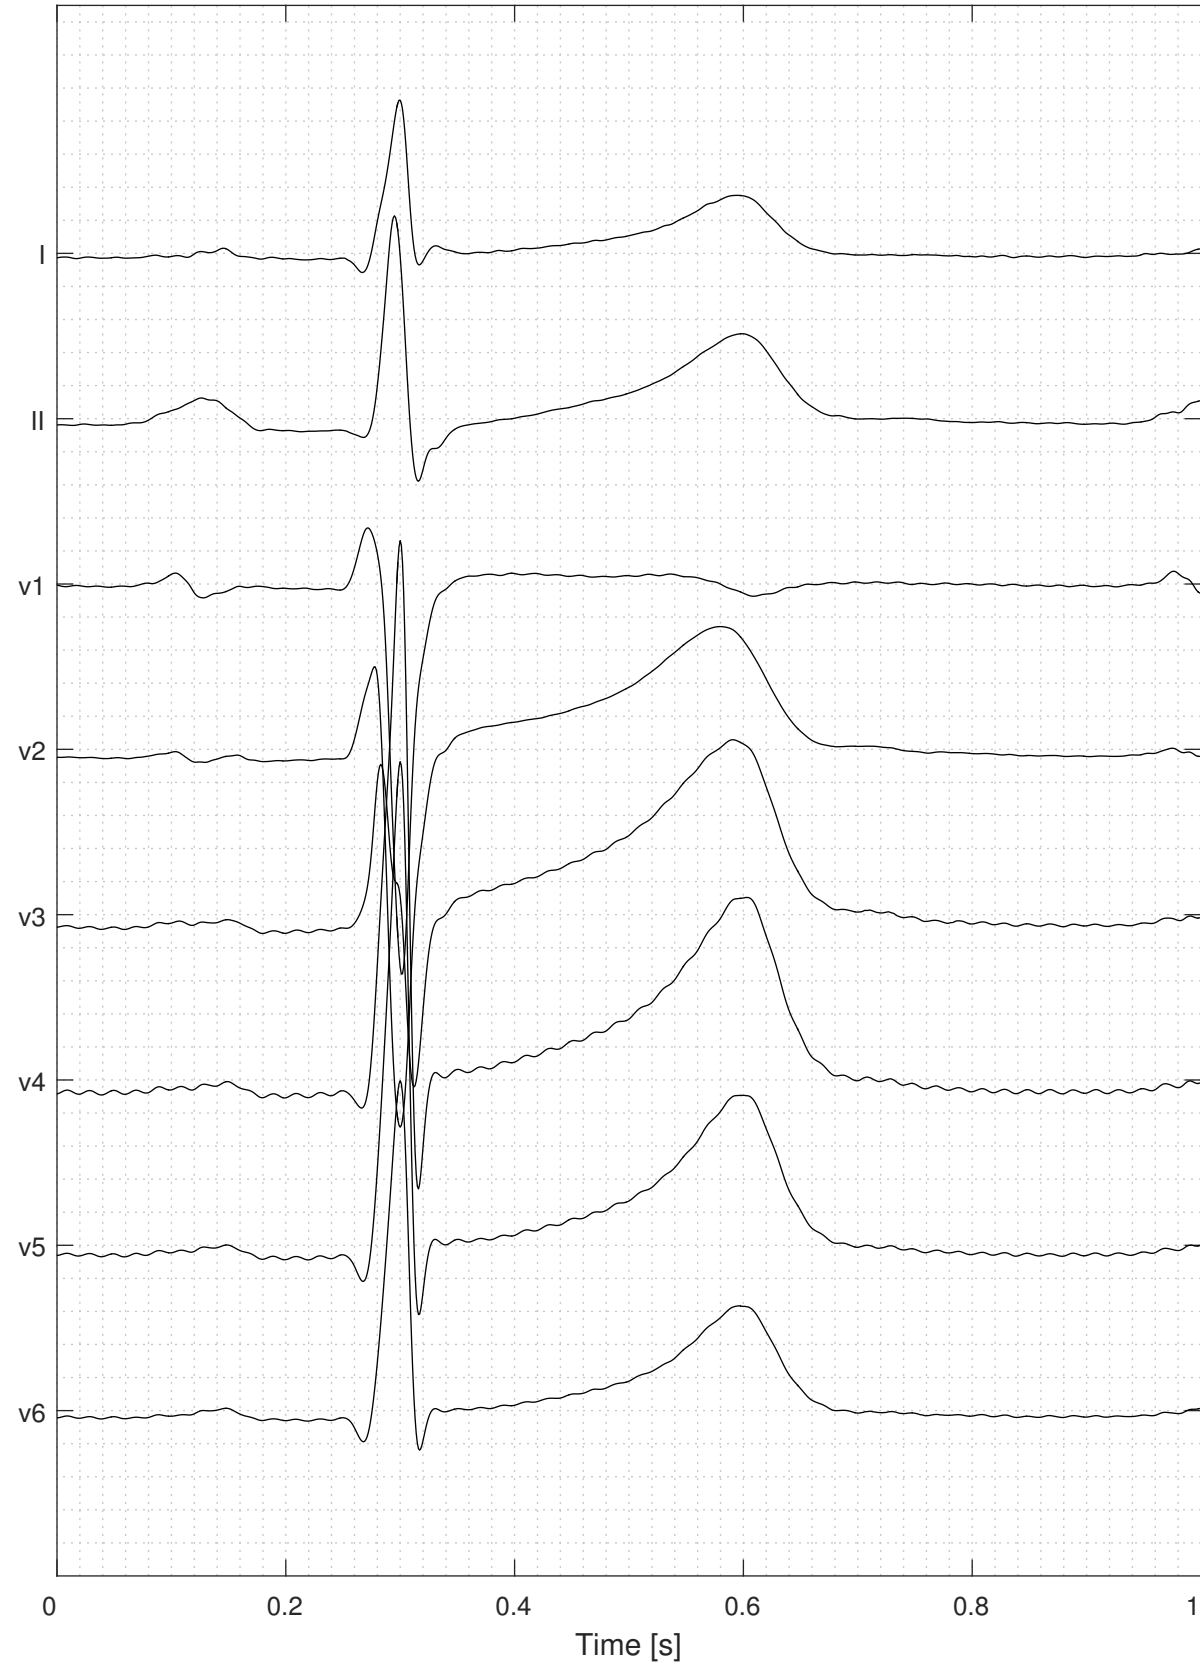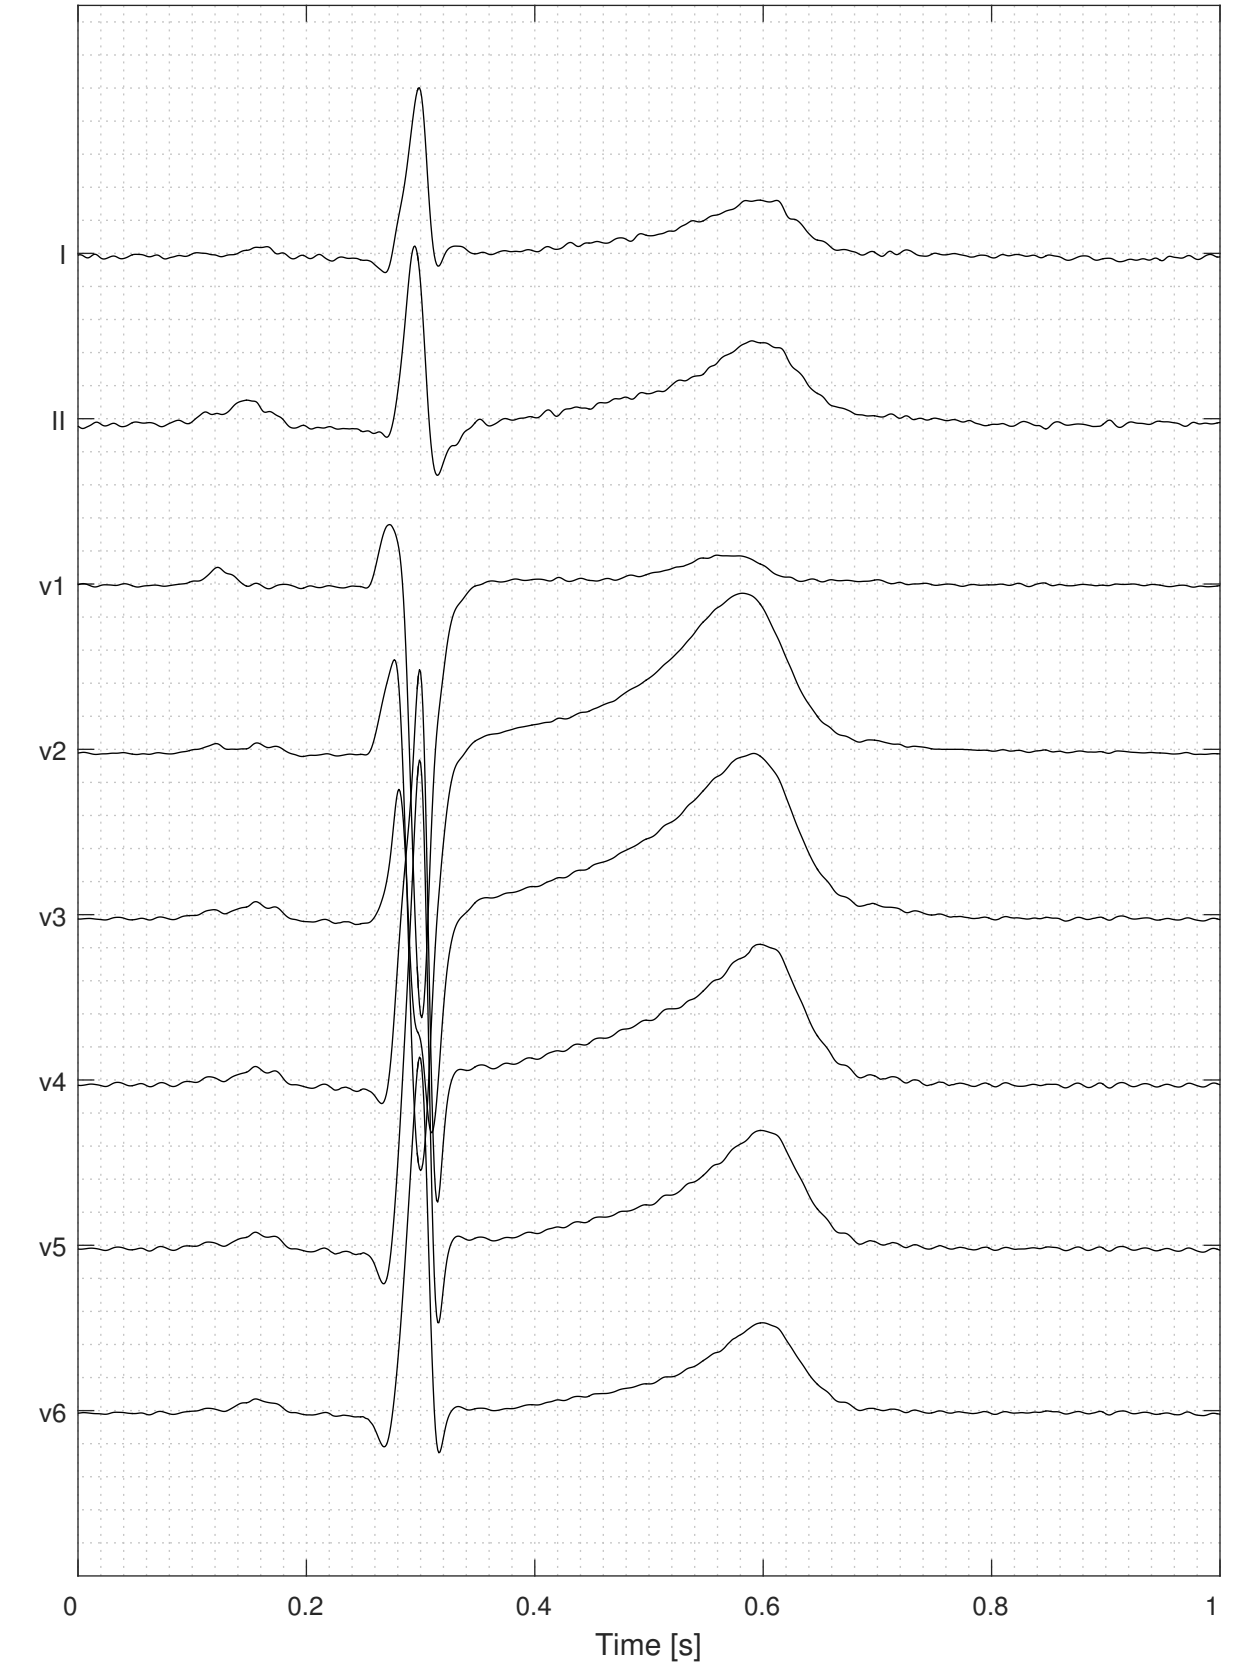

Patient 12

Low RR, Complex #: 114

Mid RR, Complex #: 97

High RR, Complex #: 9

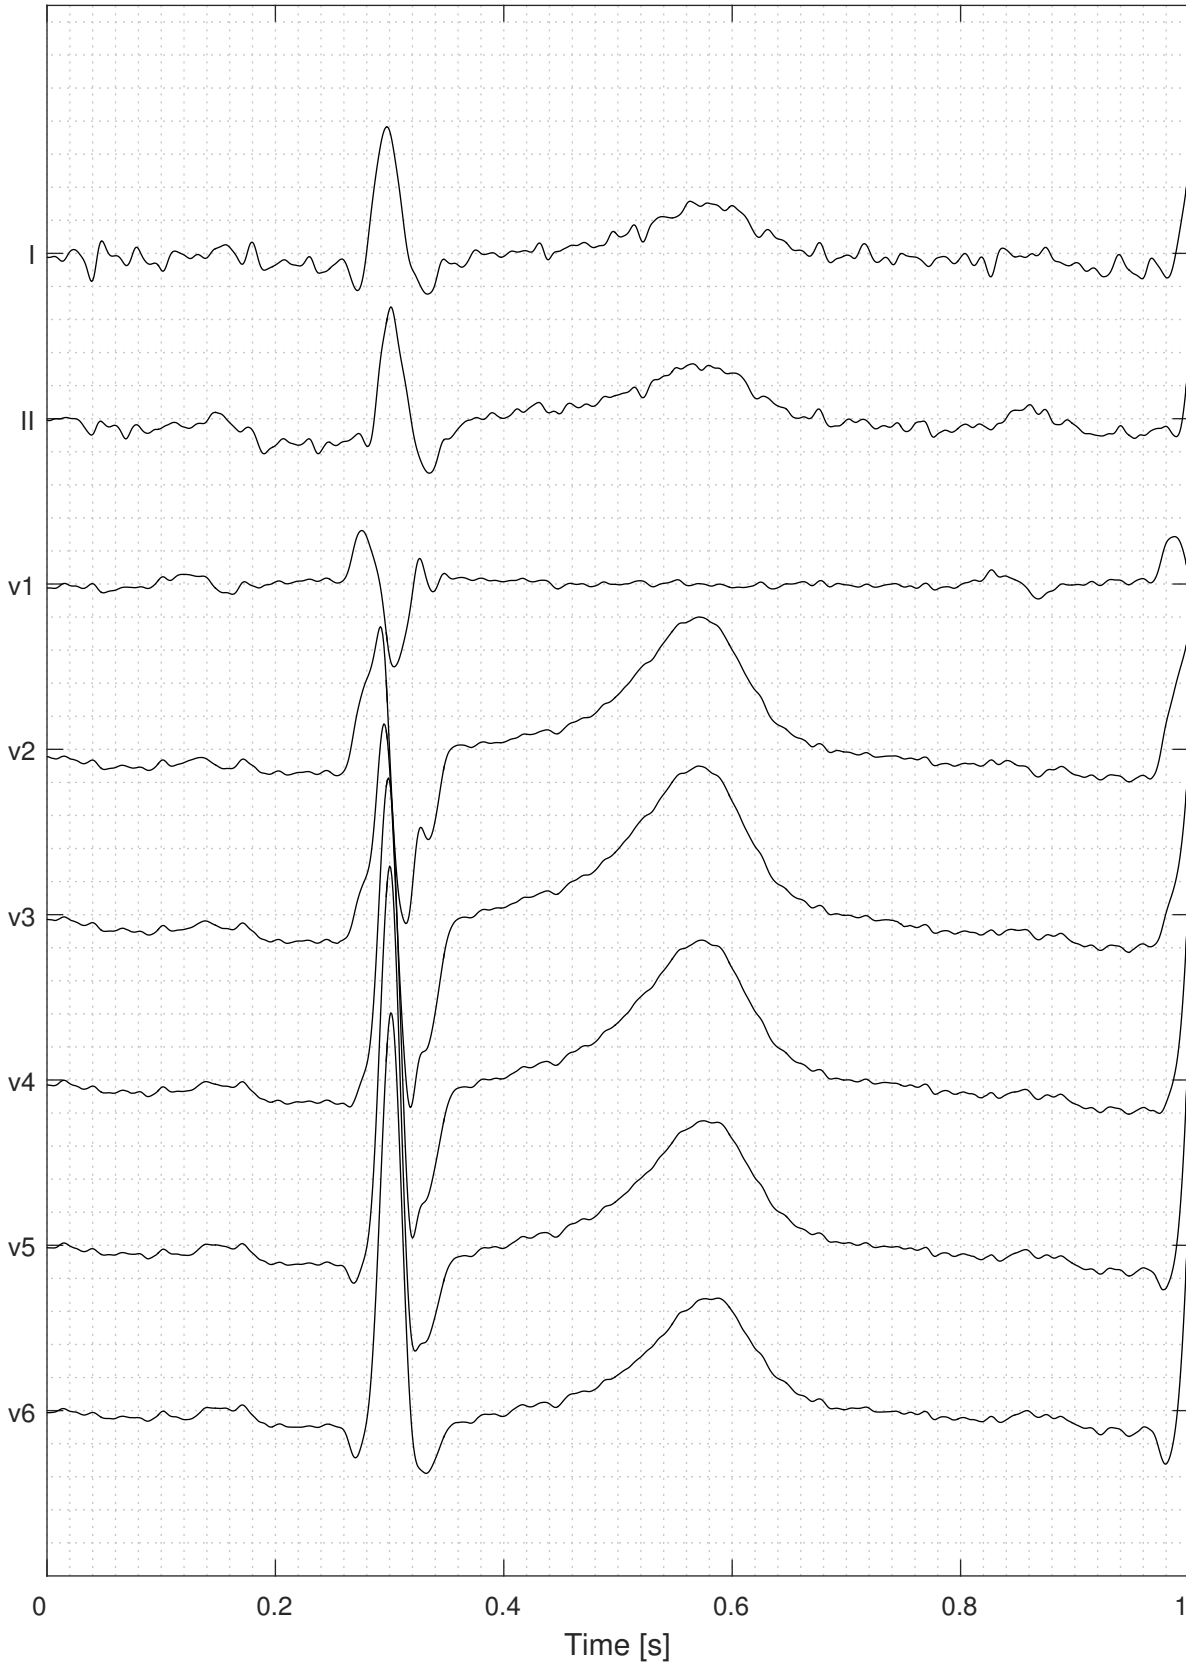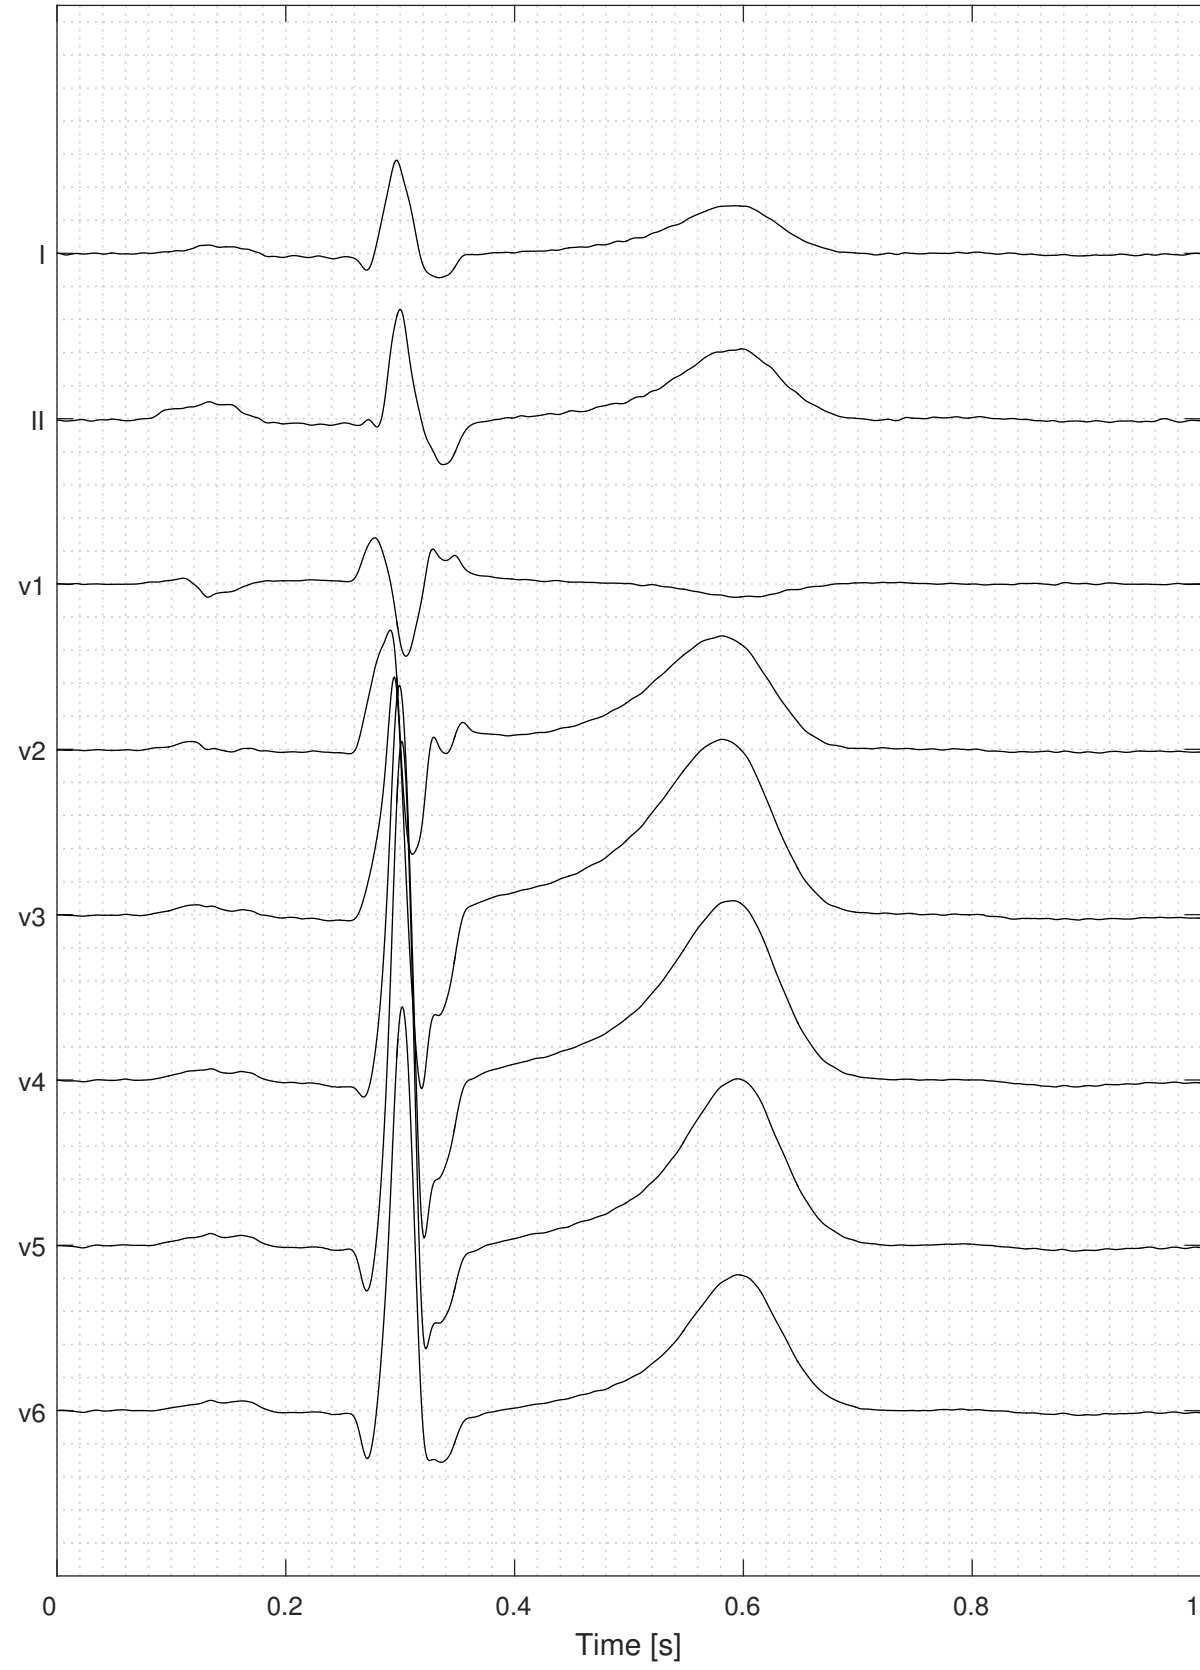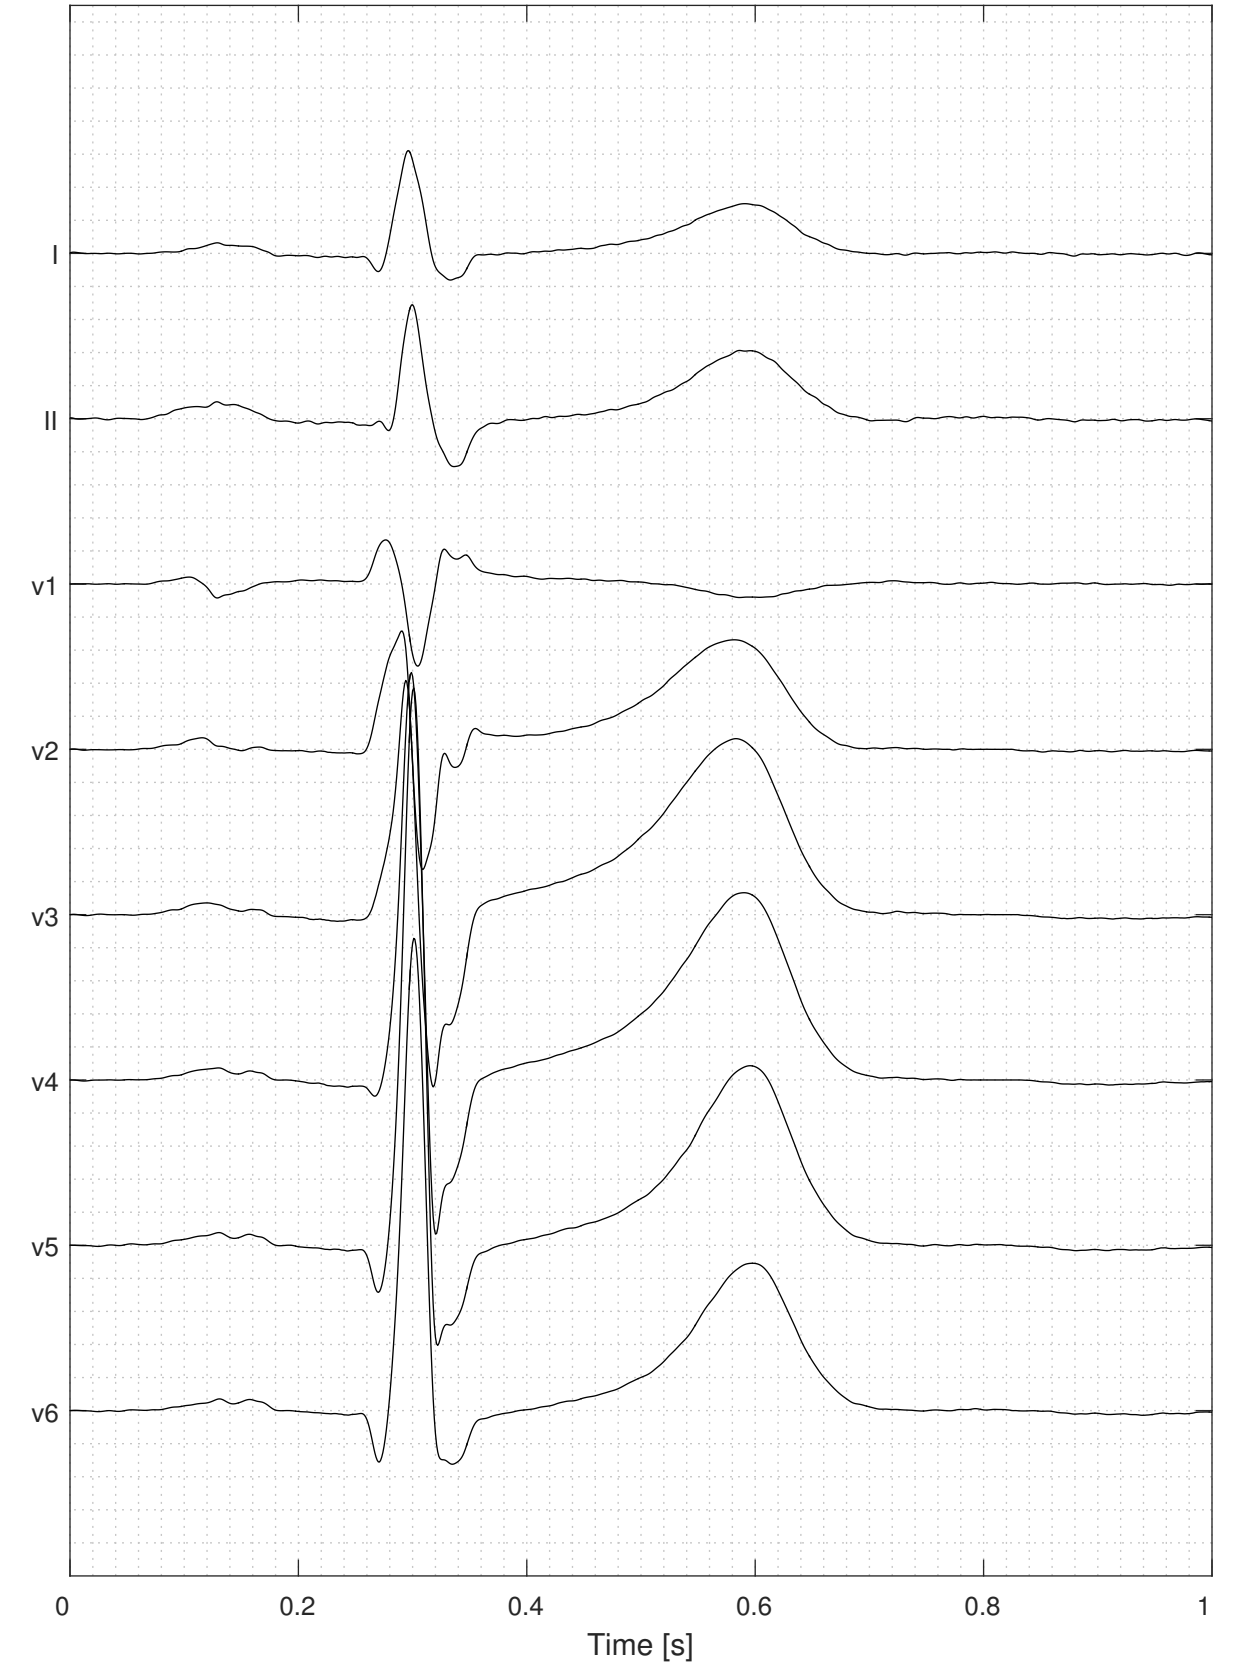

Patient 13

Low RR, Complex #: 133

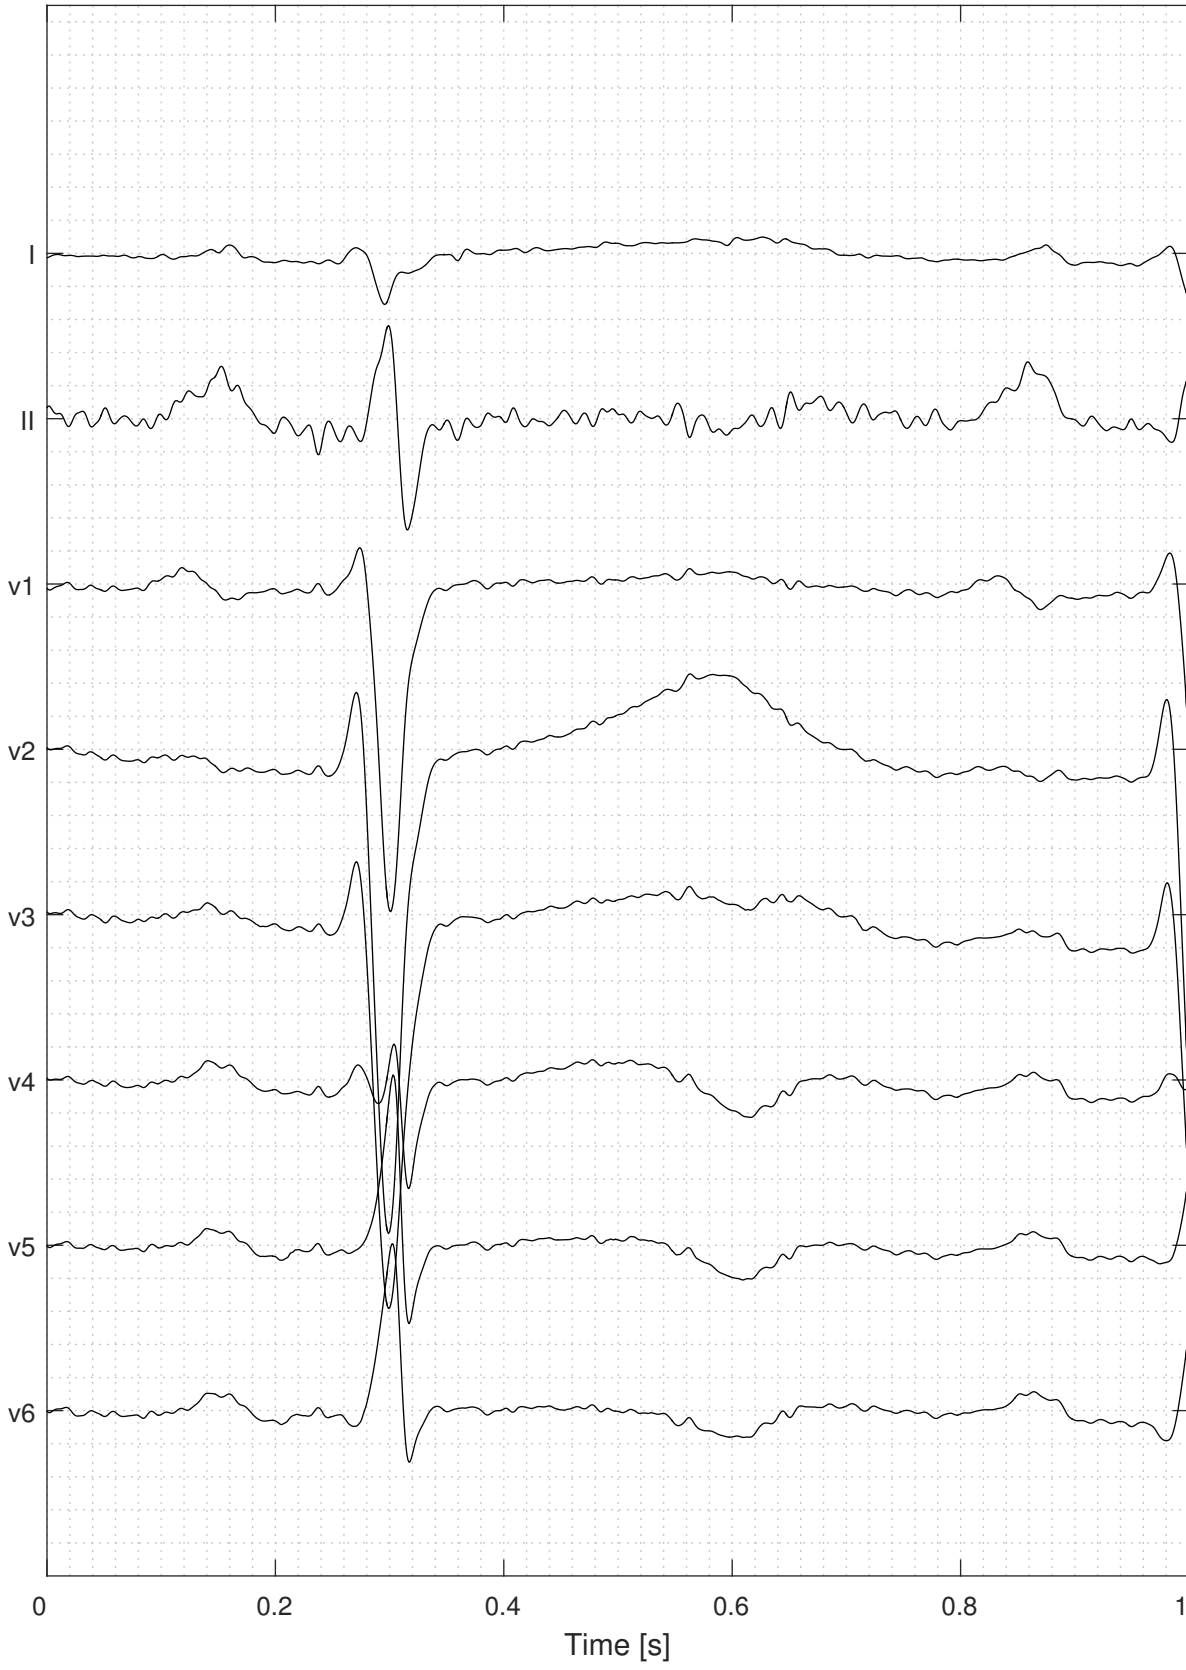

Mid RR, Complex #: 209

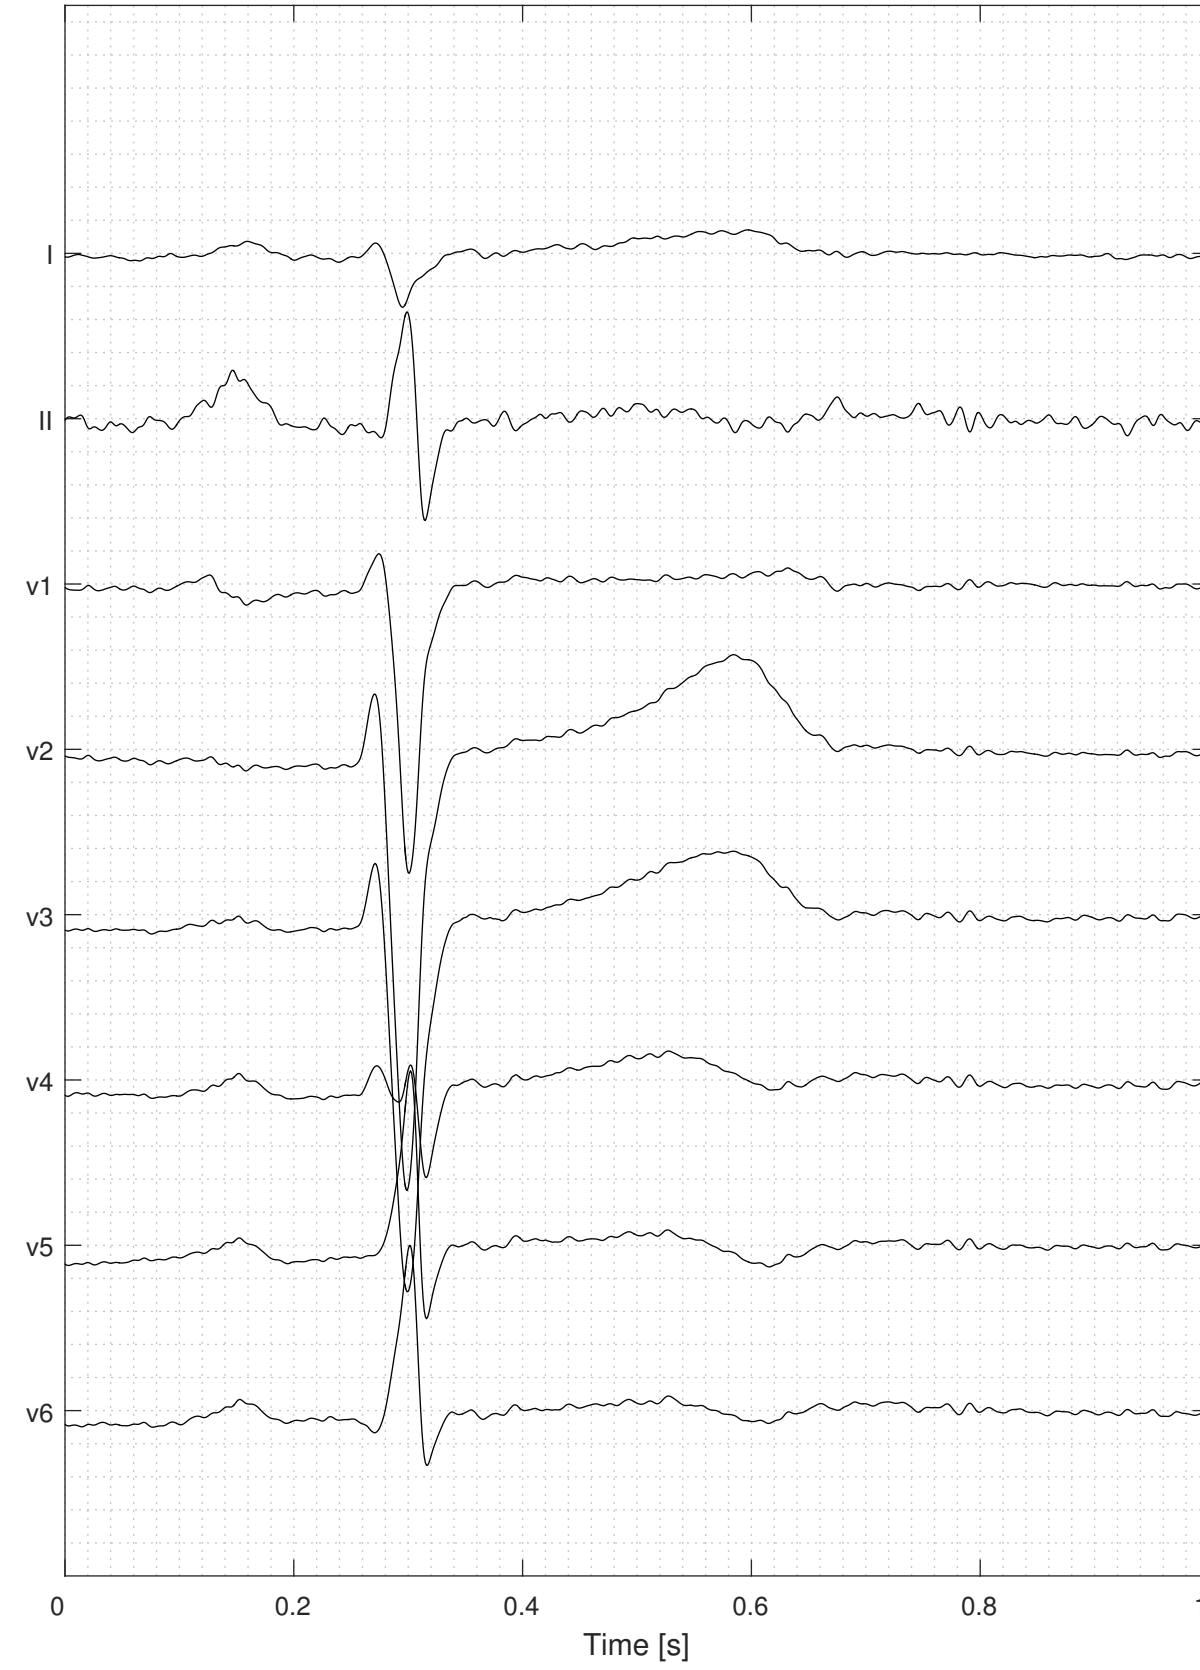

High RR, Complex #: 98

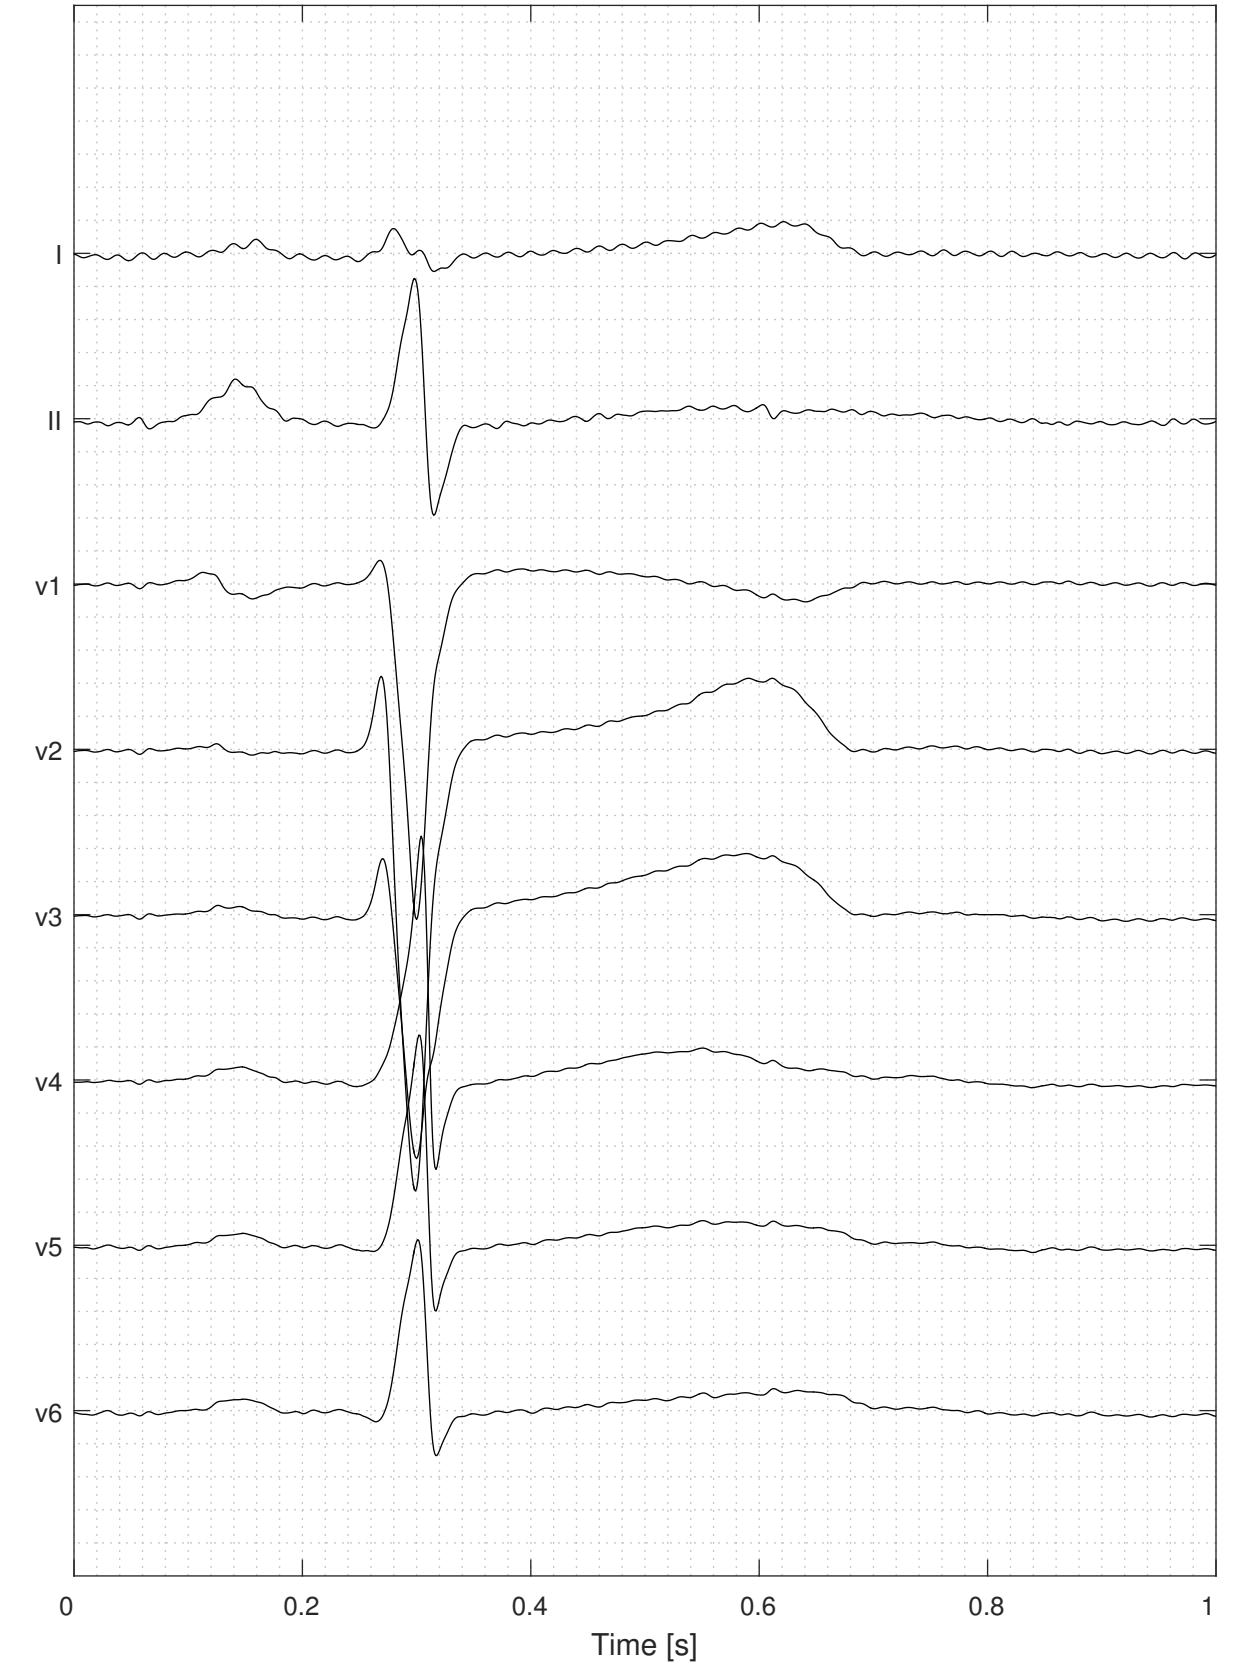

Patient 14

Low RR, Complex #: 13

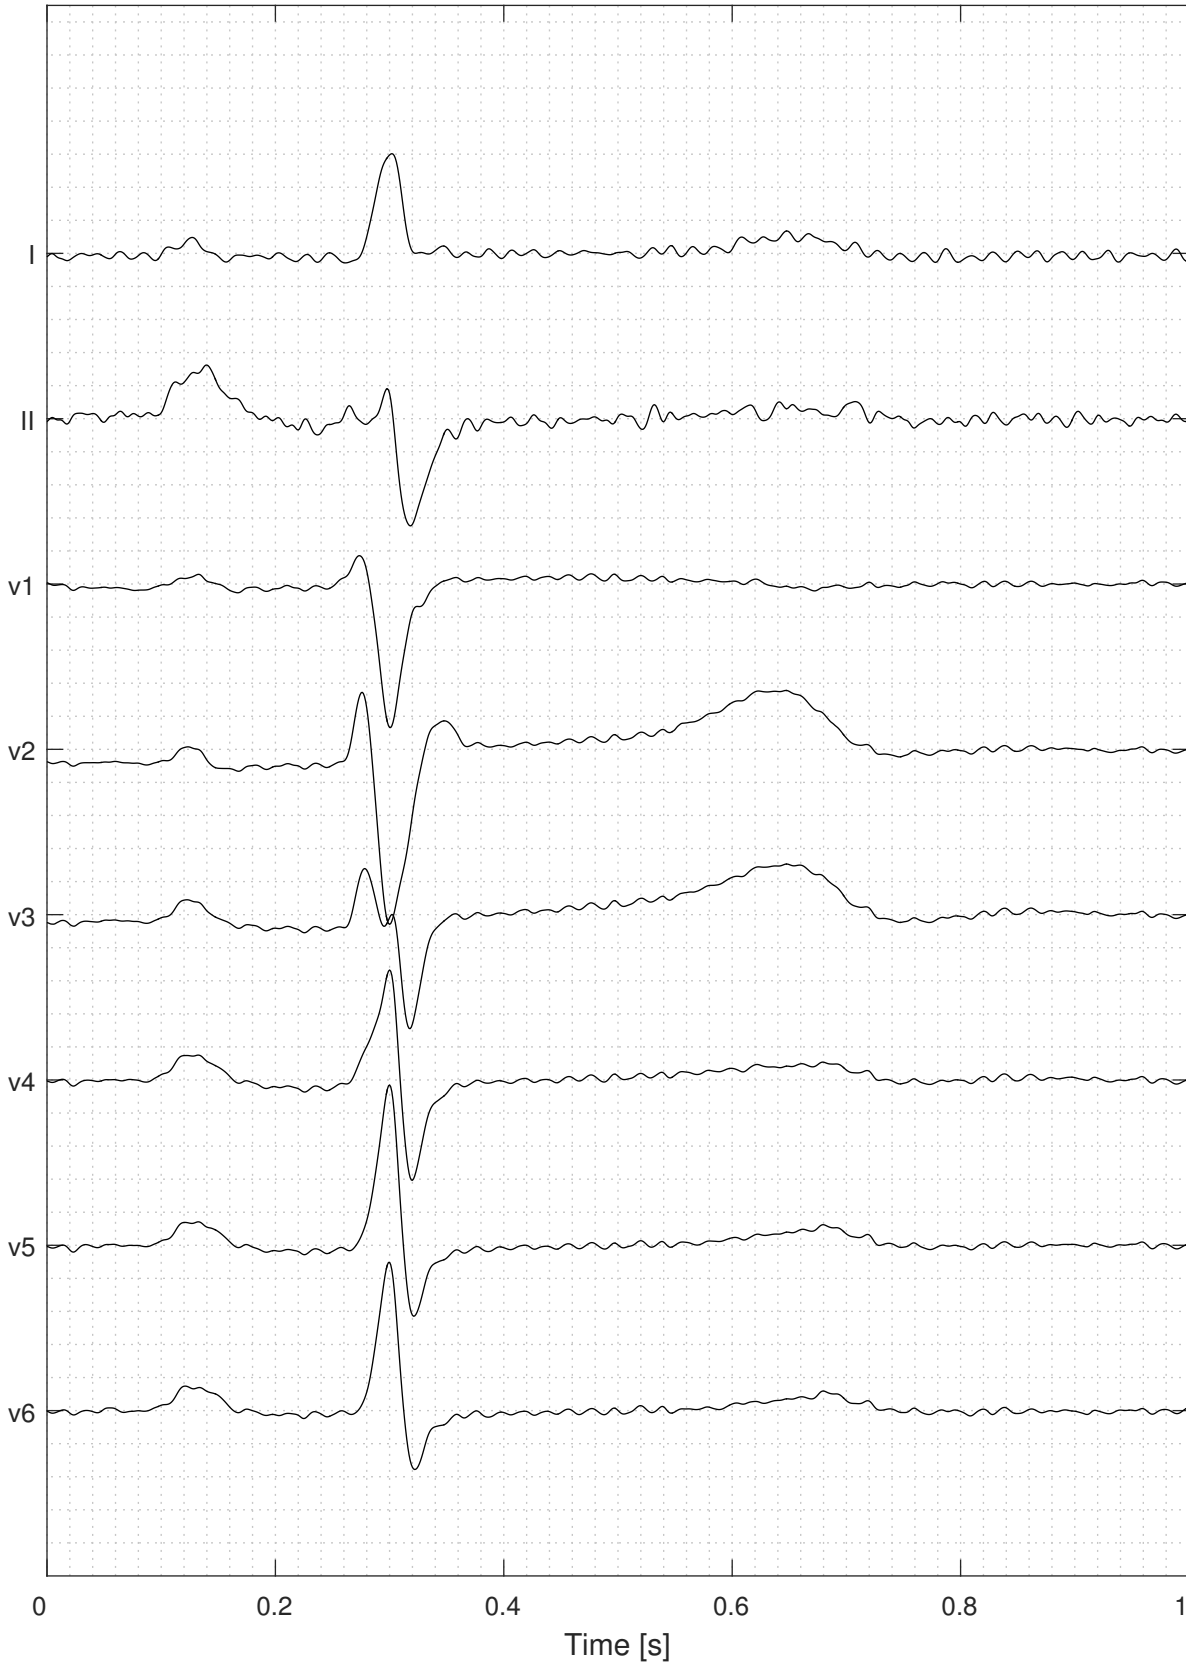

Mid RR, Complex #: 276

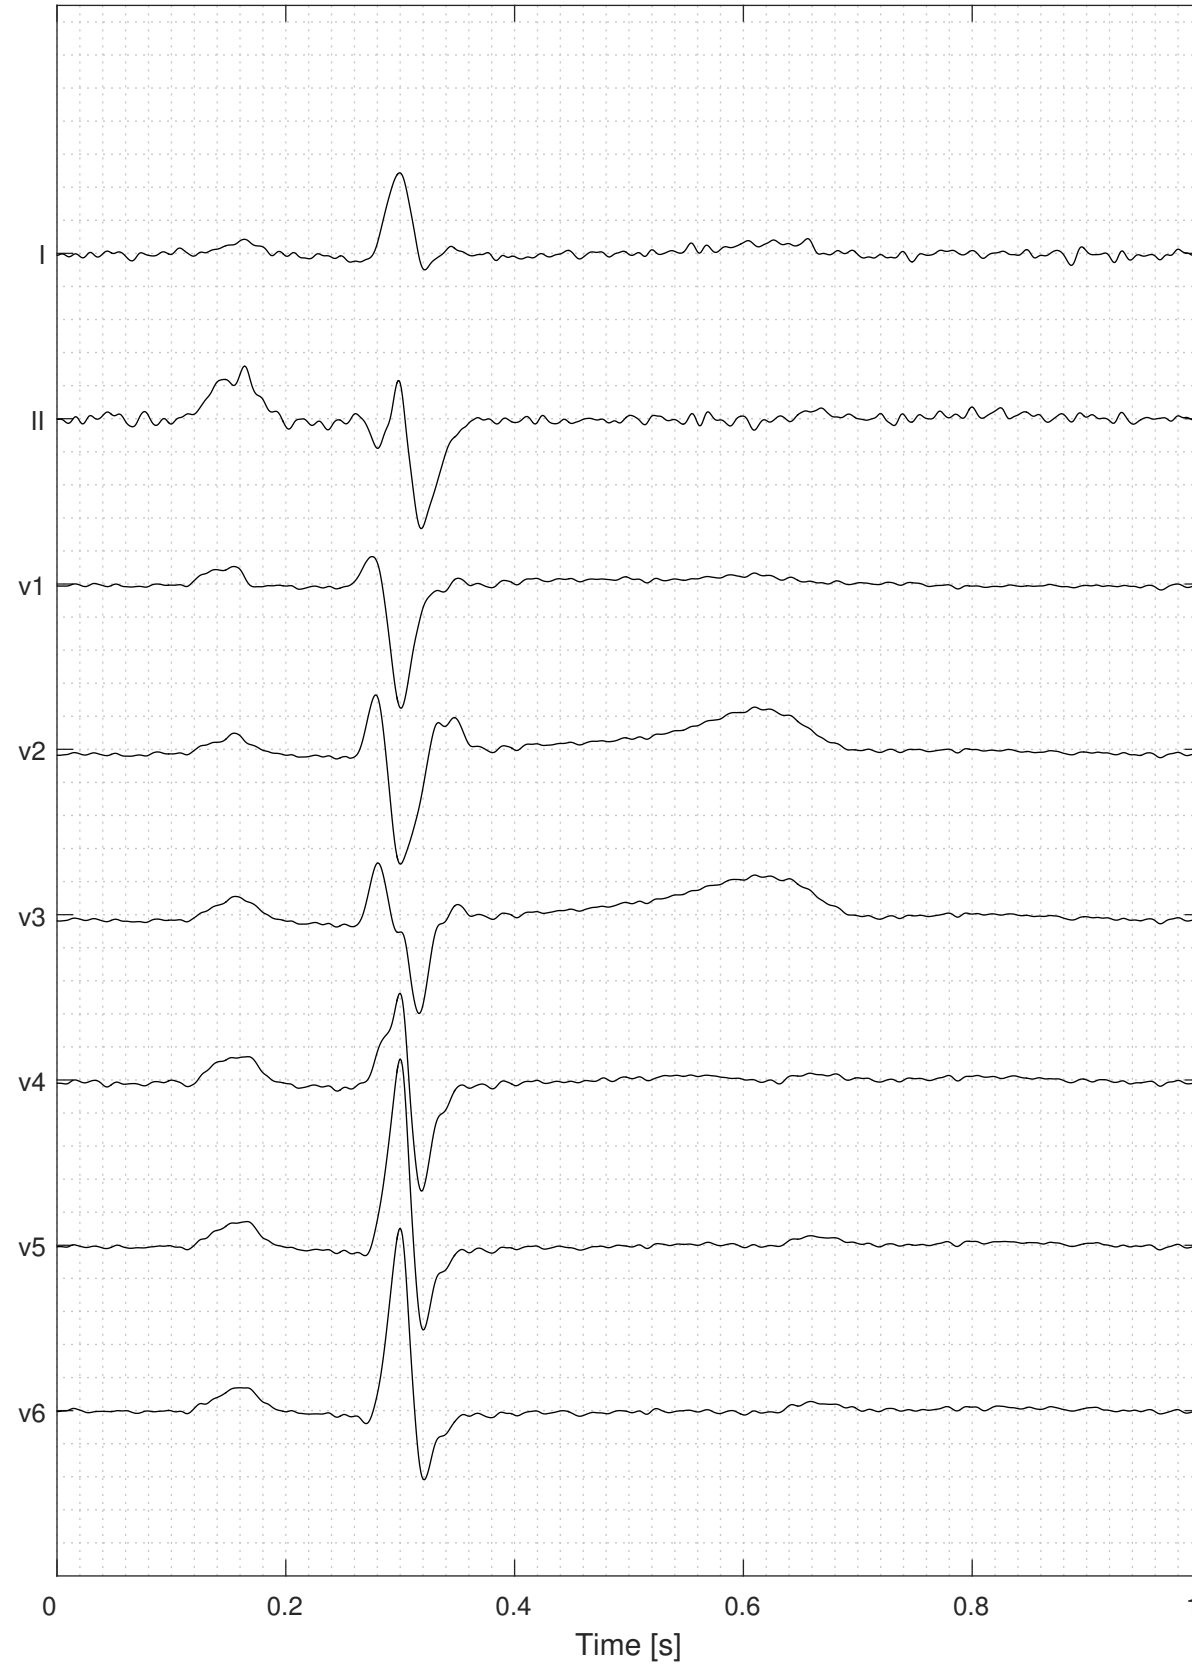

High RR, Complex #: 83

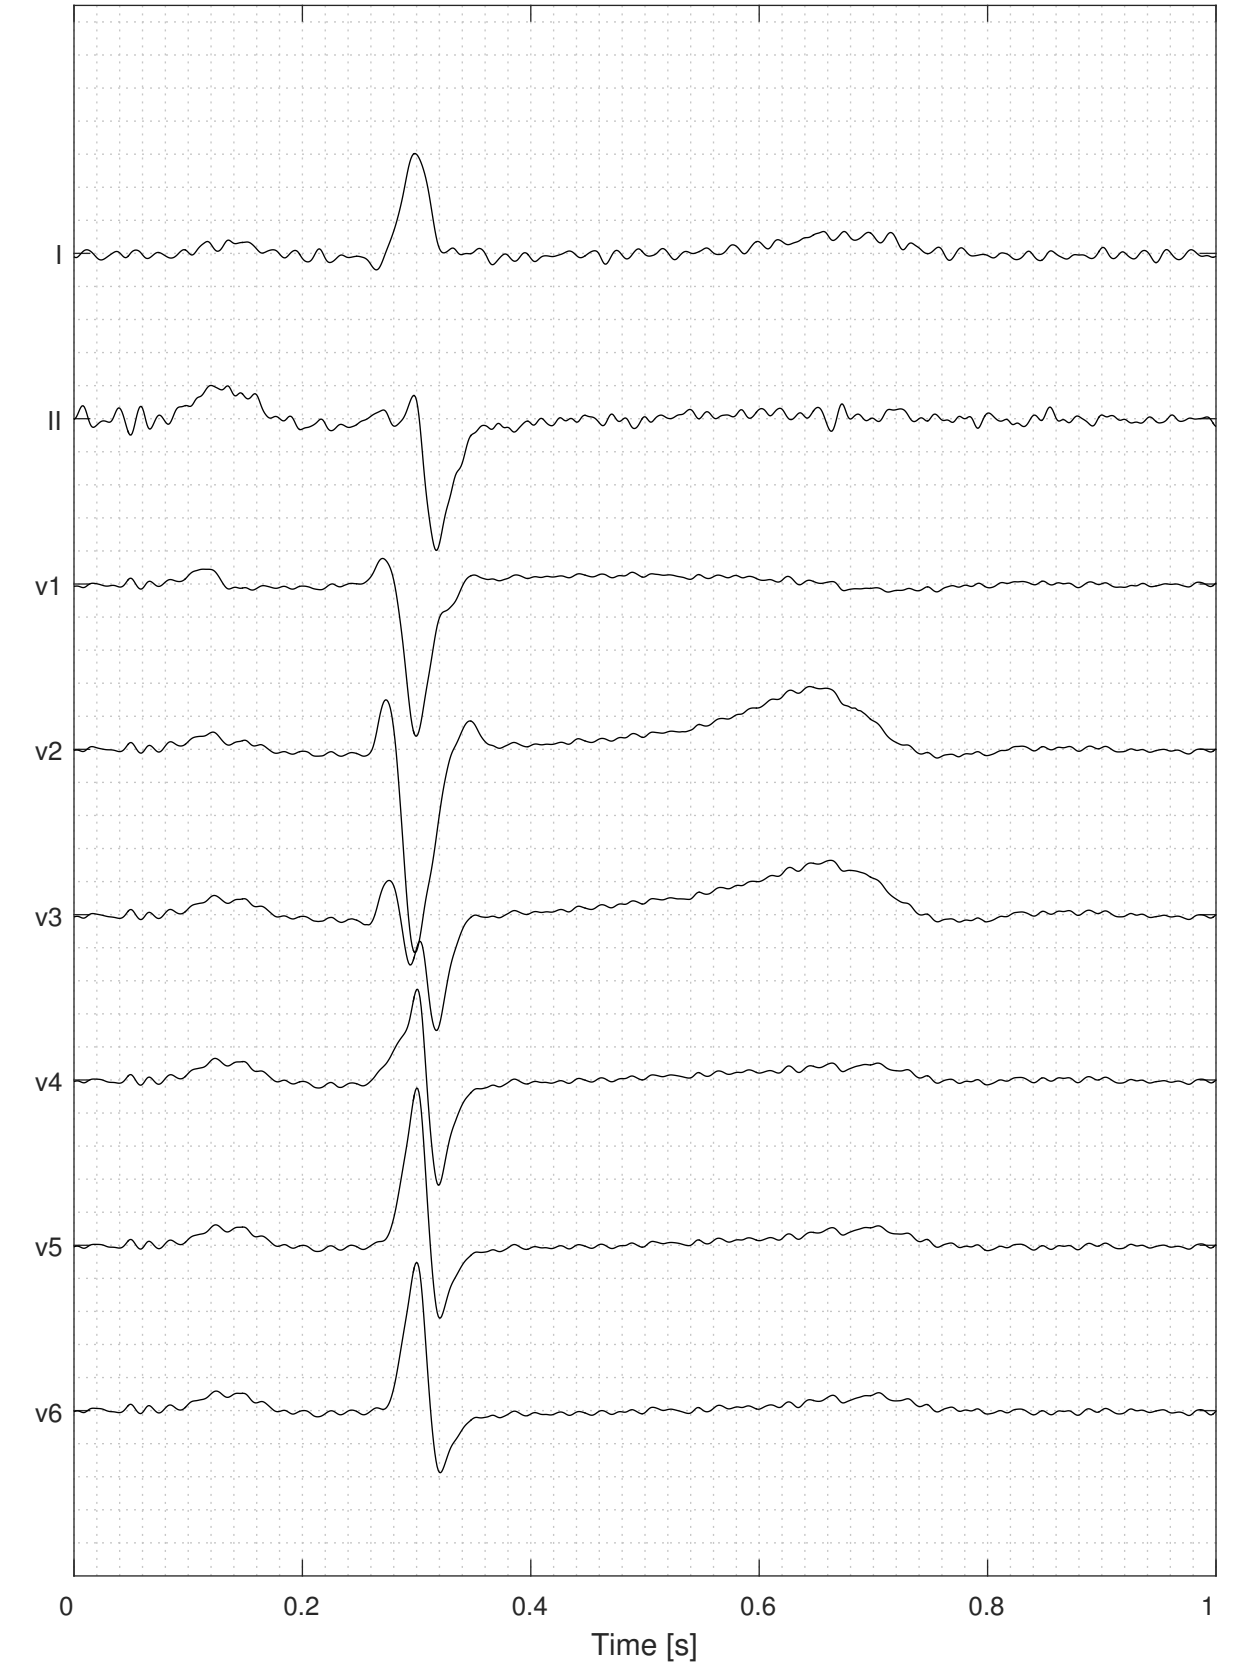

Patient 15

Low RR, Complex #: 318

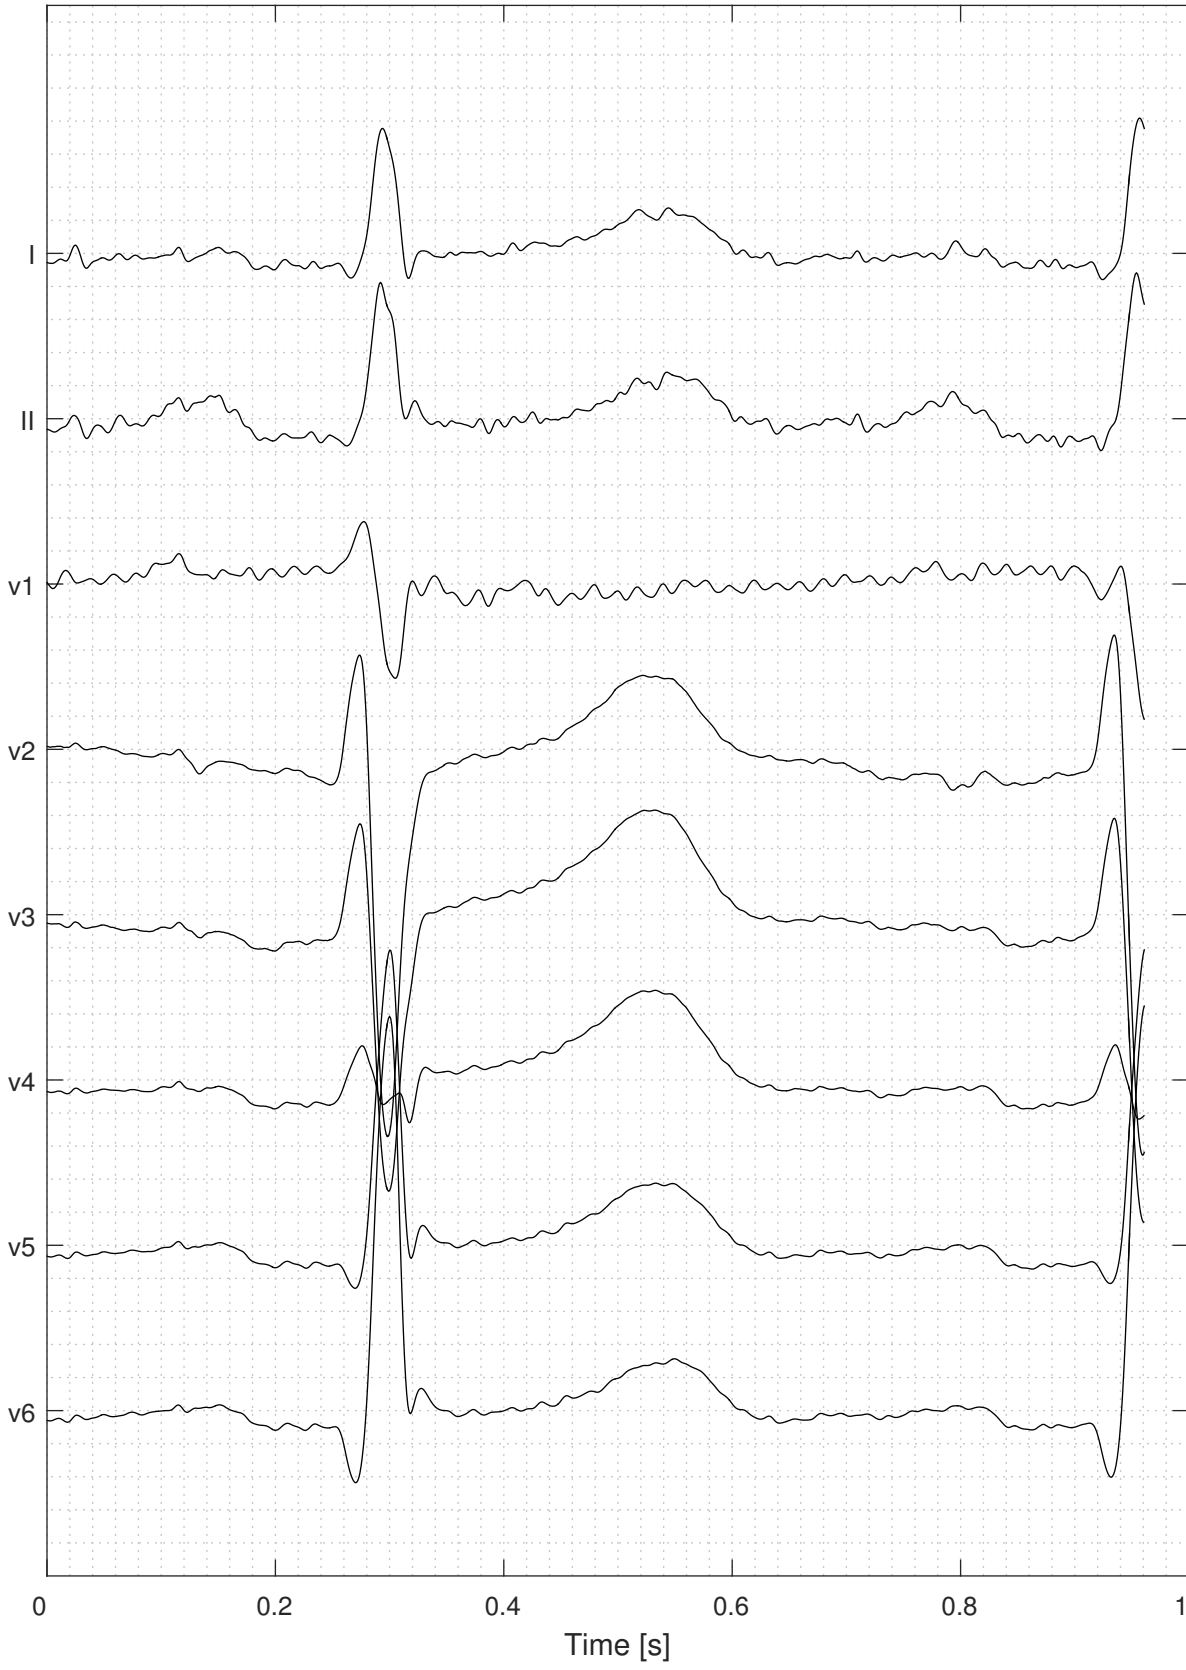

Mid RR, Complex #: 17

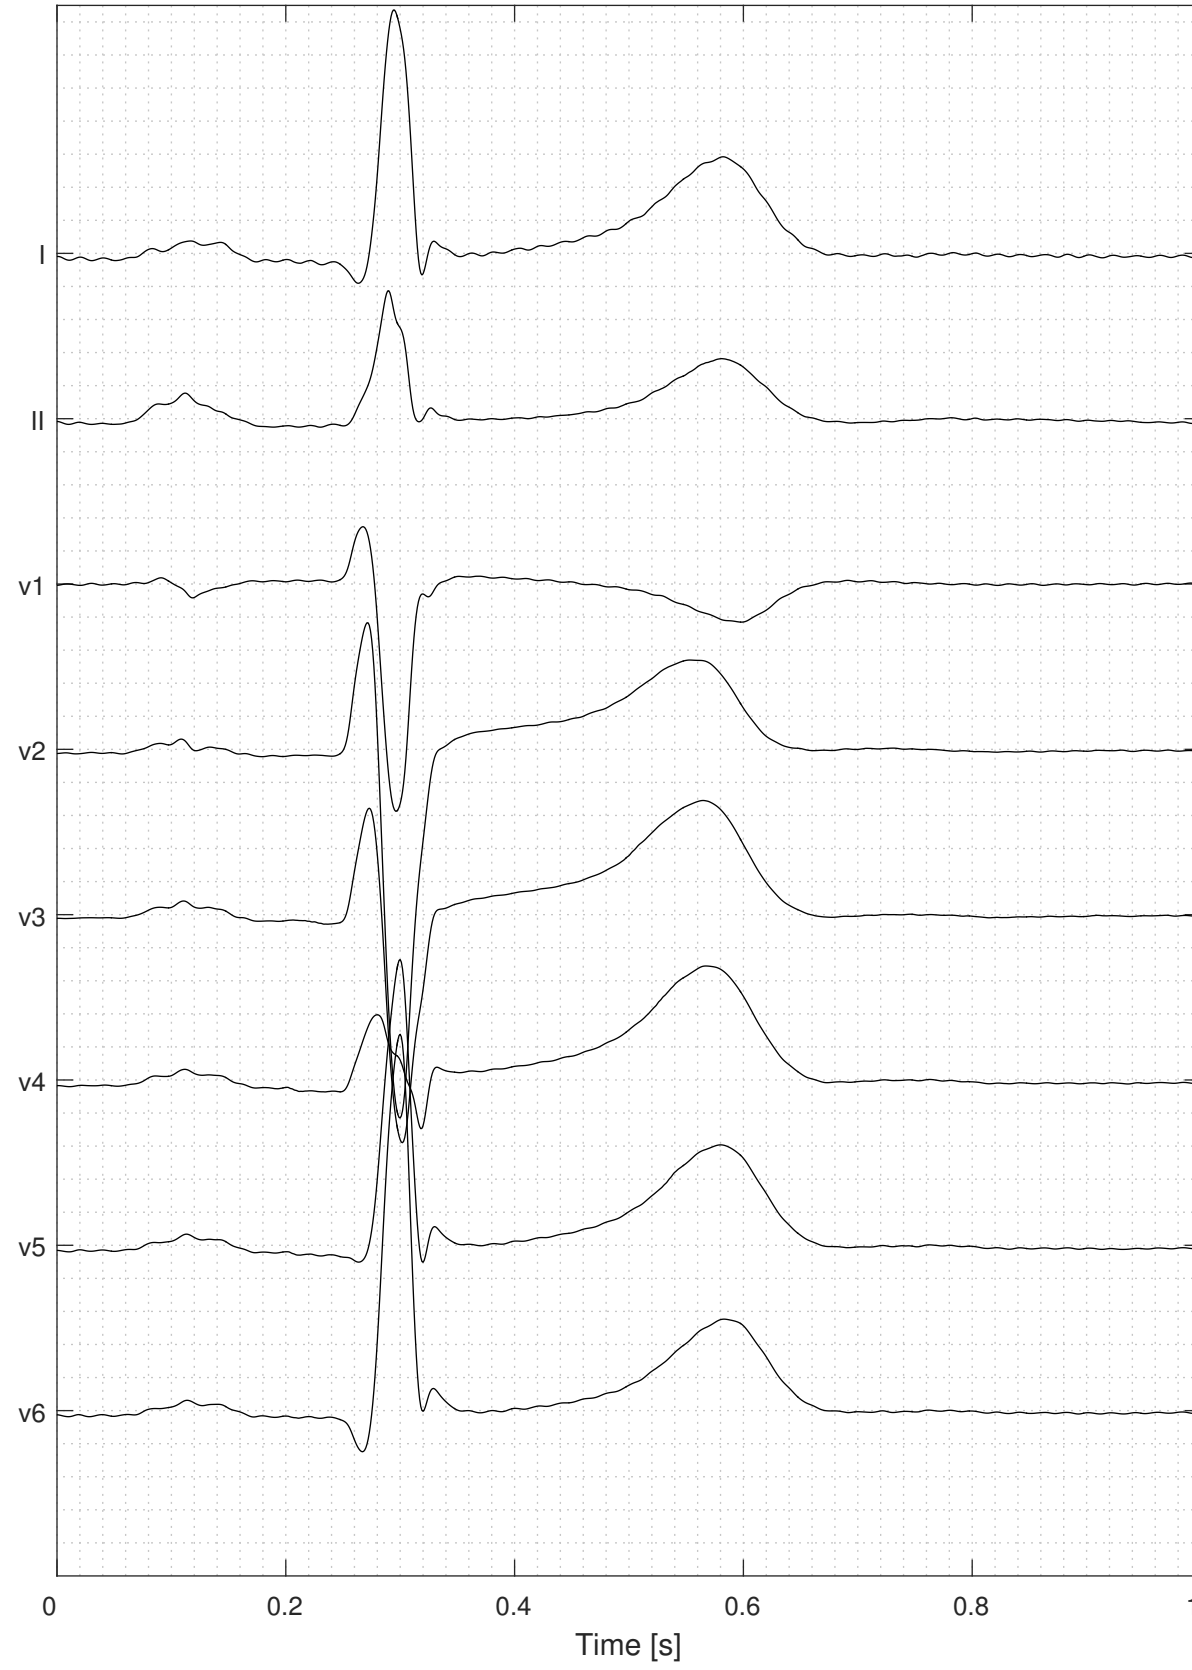

High RR, Complex #: 162

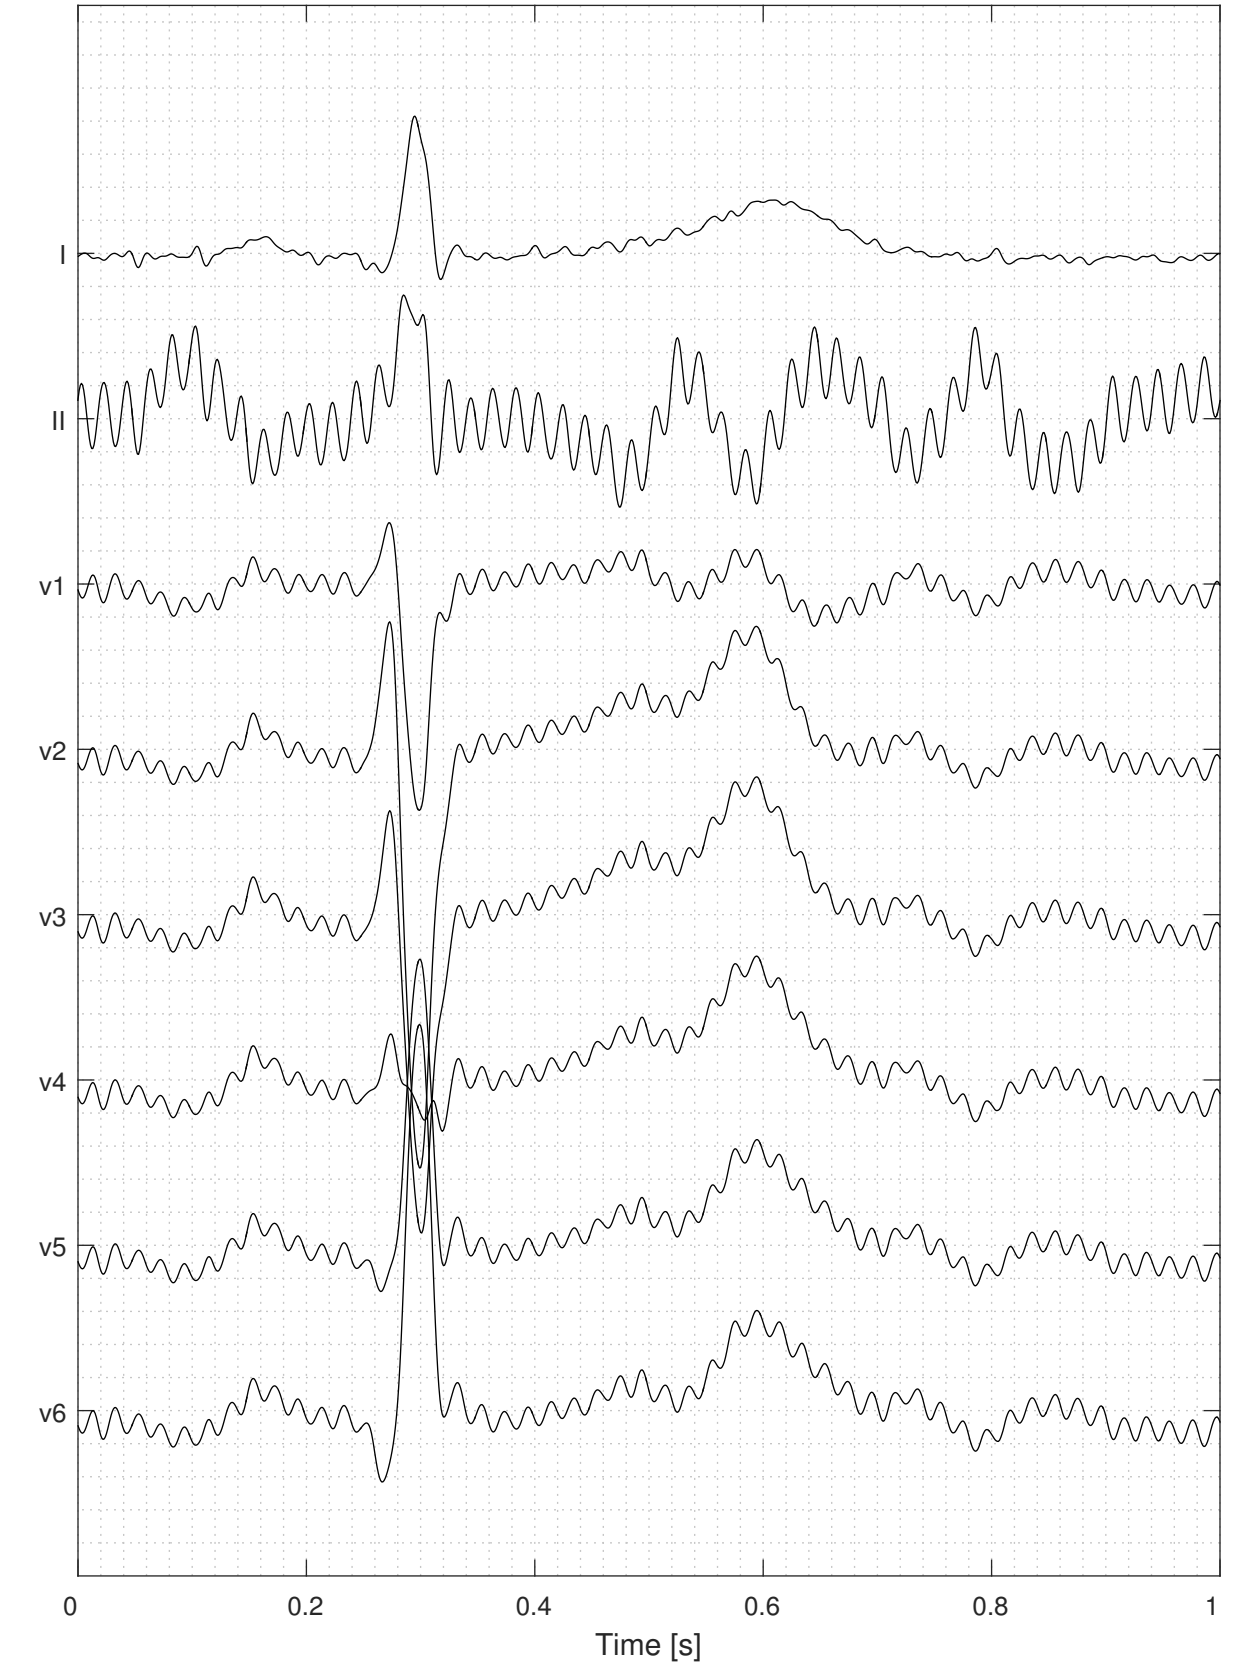

Patient 16

Low RR, Complex #: 318

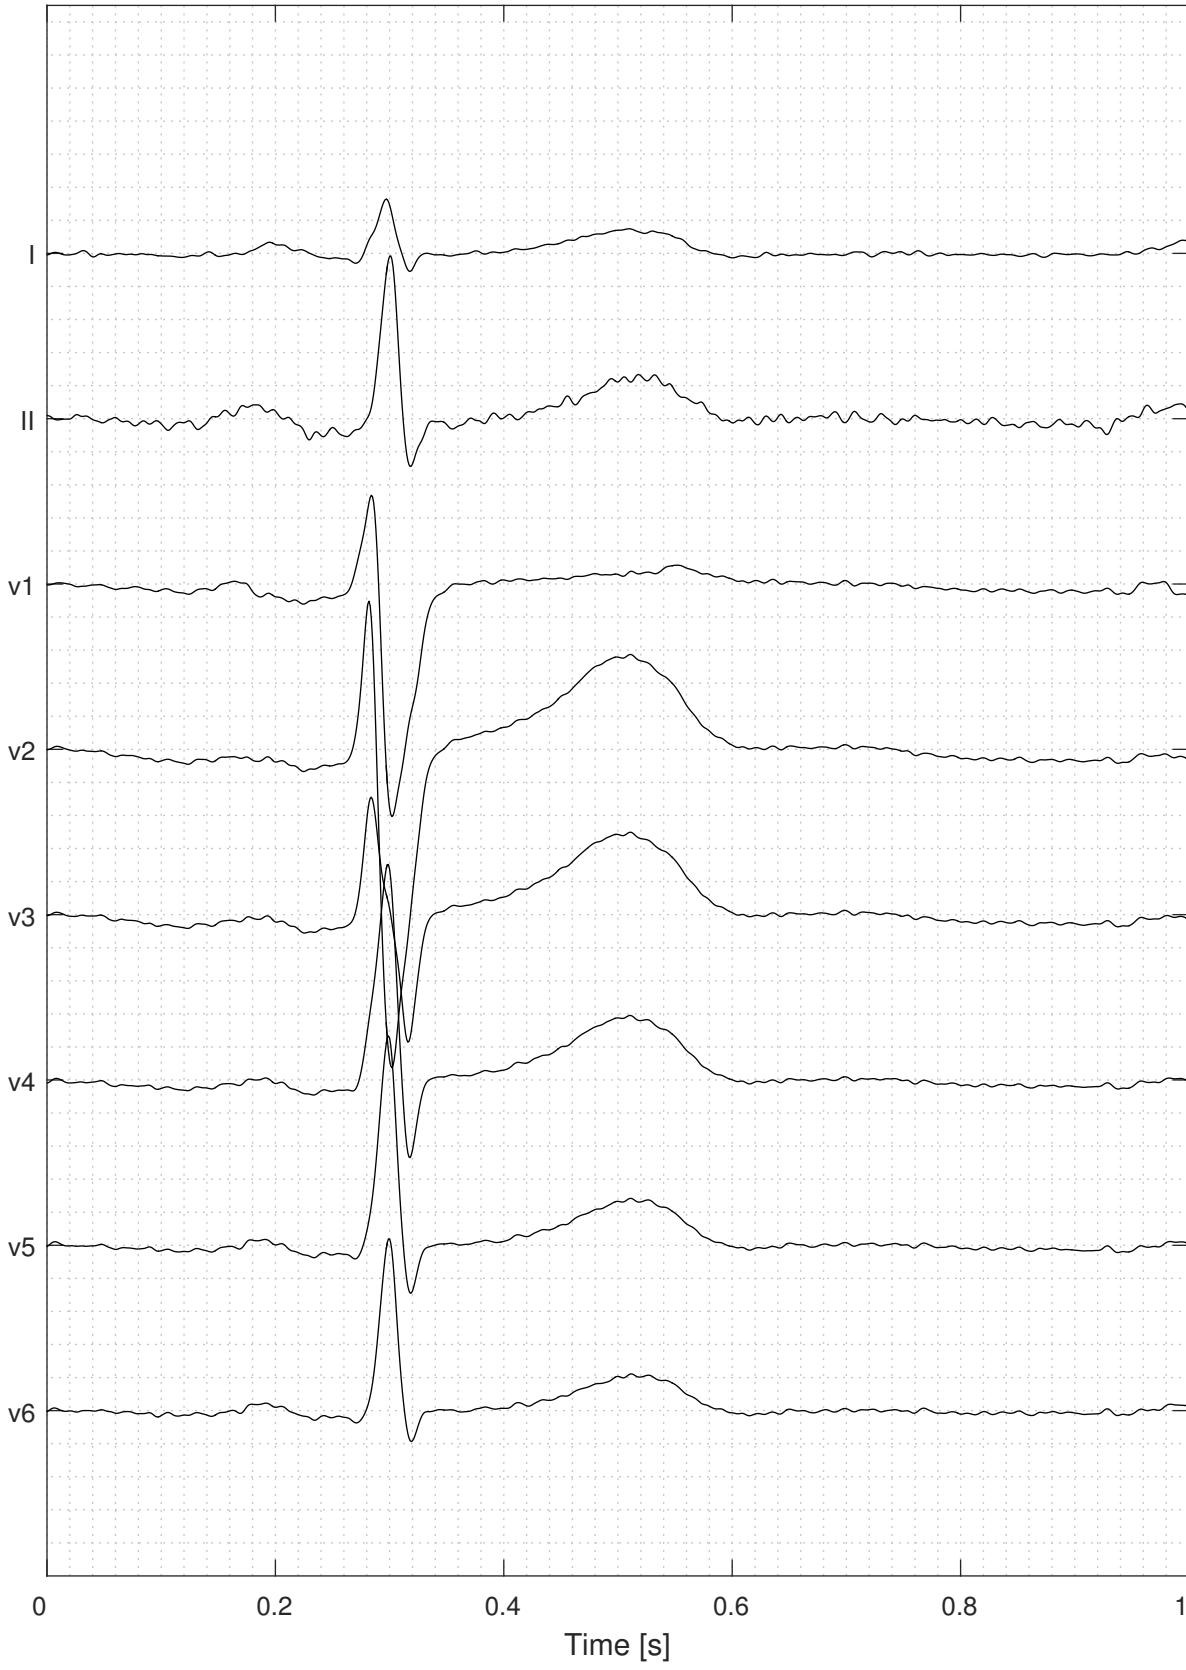

Mid RR, Complex #: 366

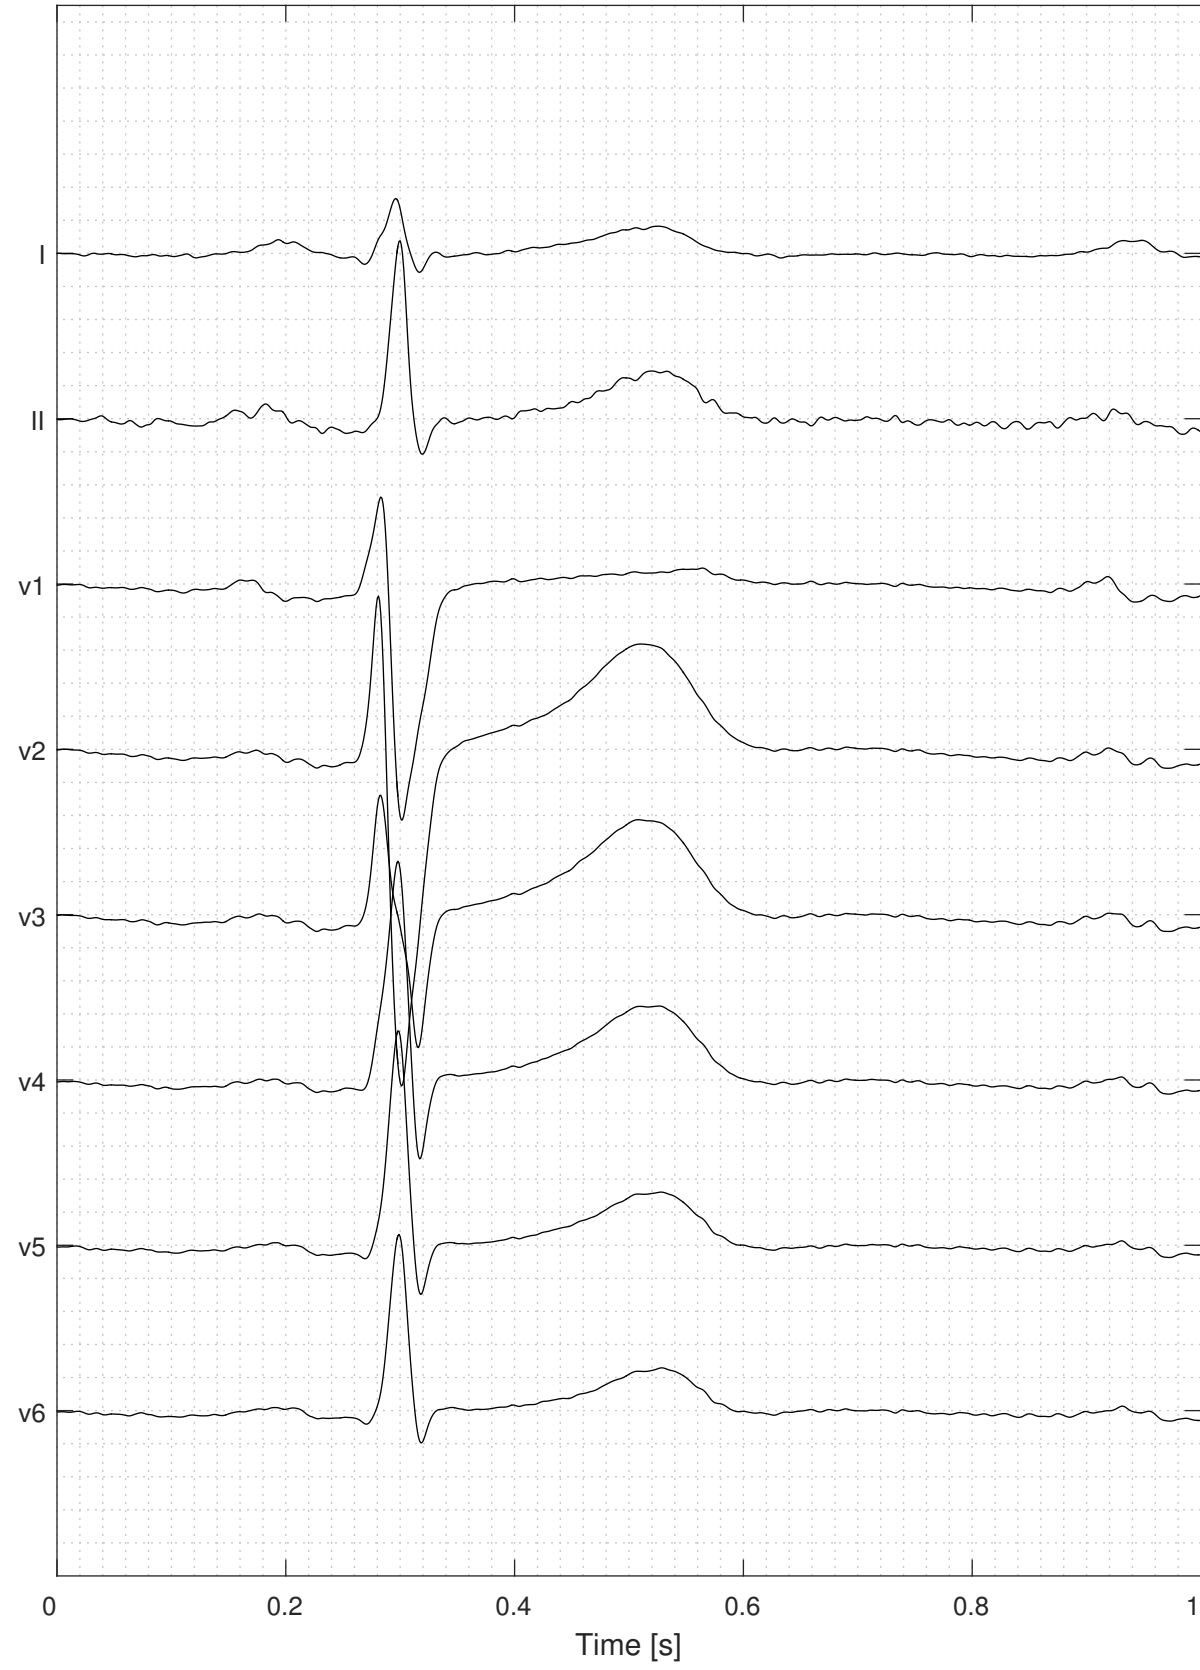

High RR, Complex #: 341

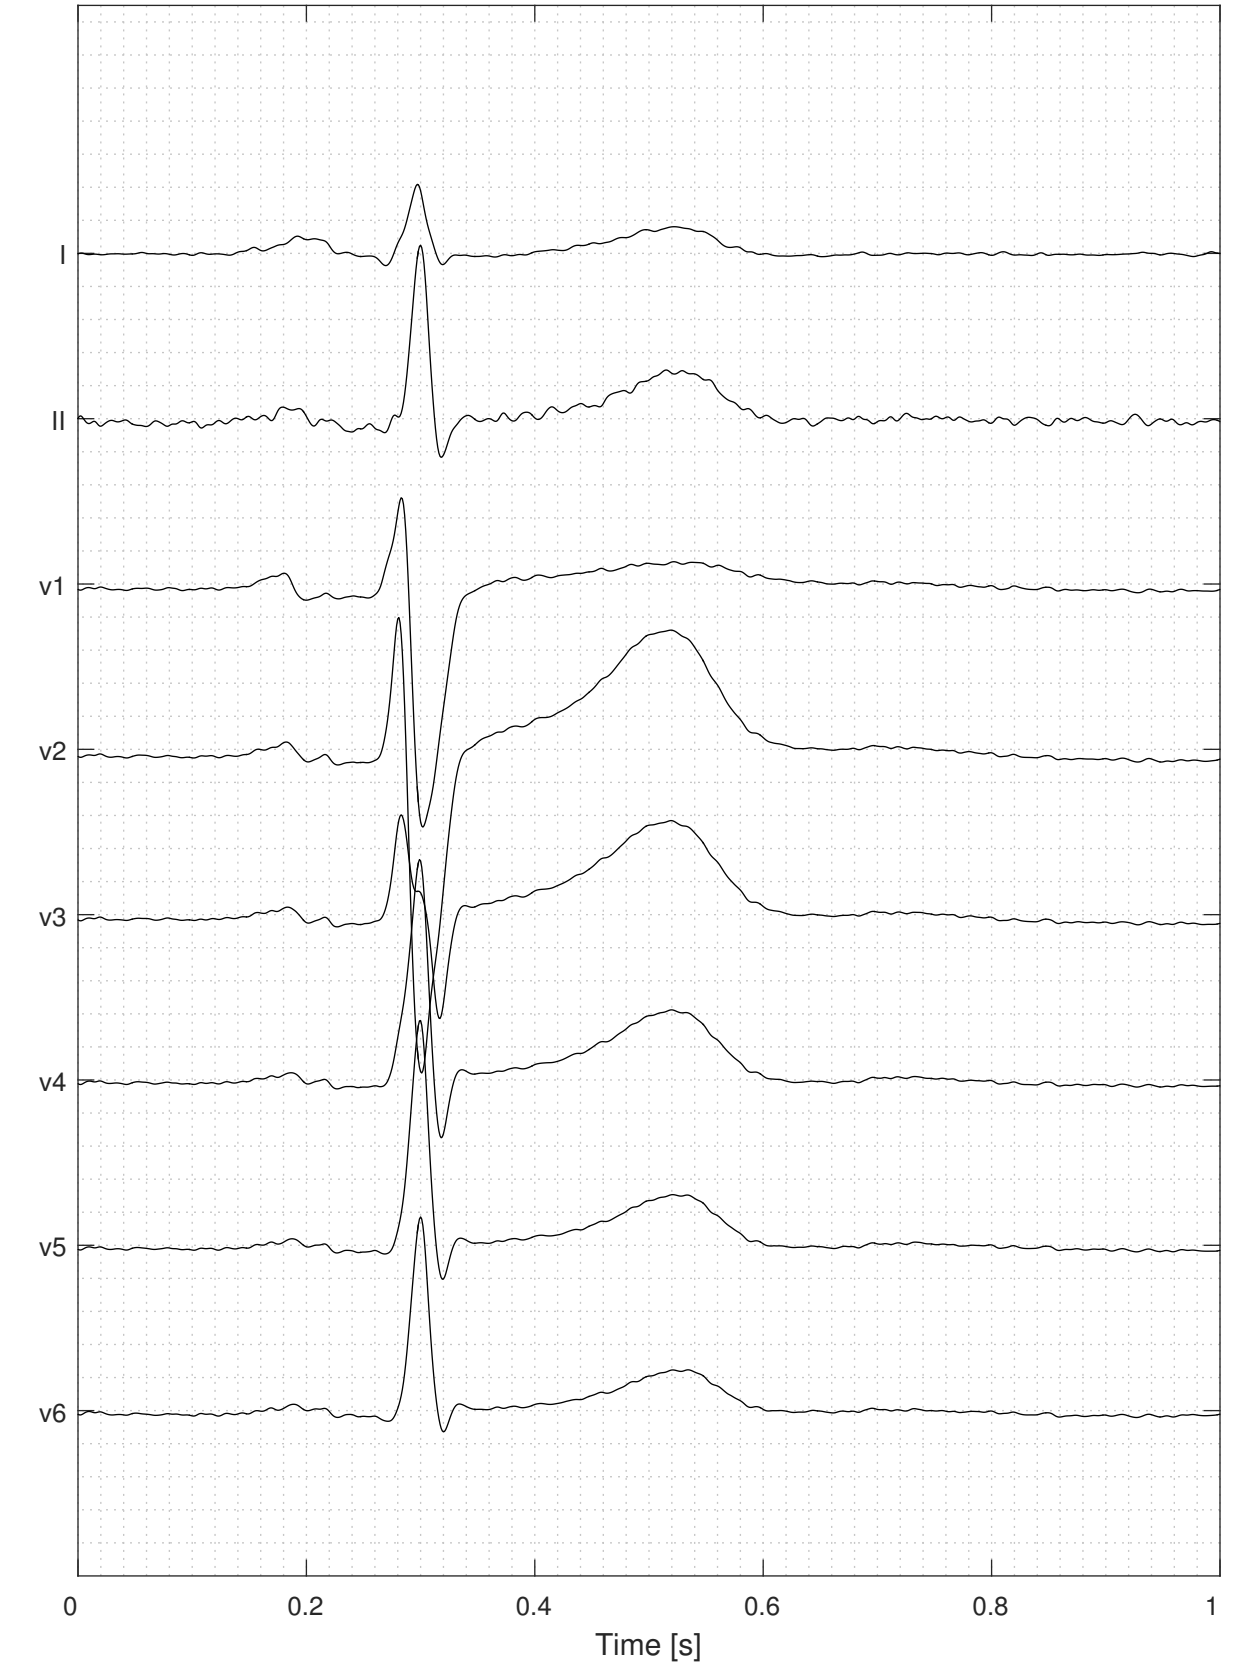



Patient 17

Low RR, Complex #: 333

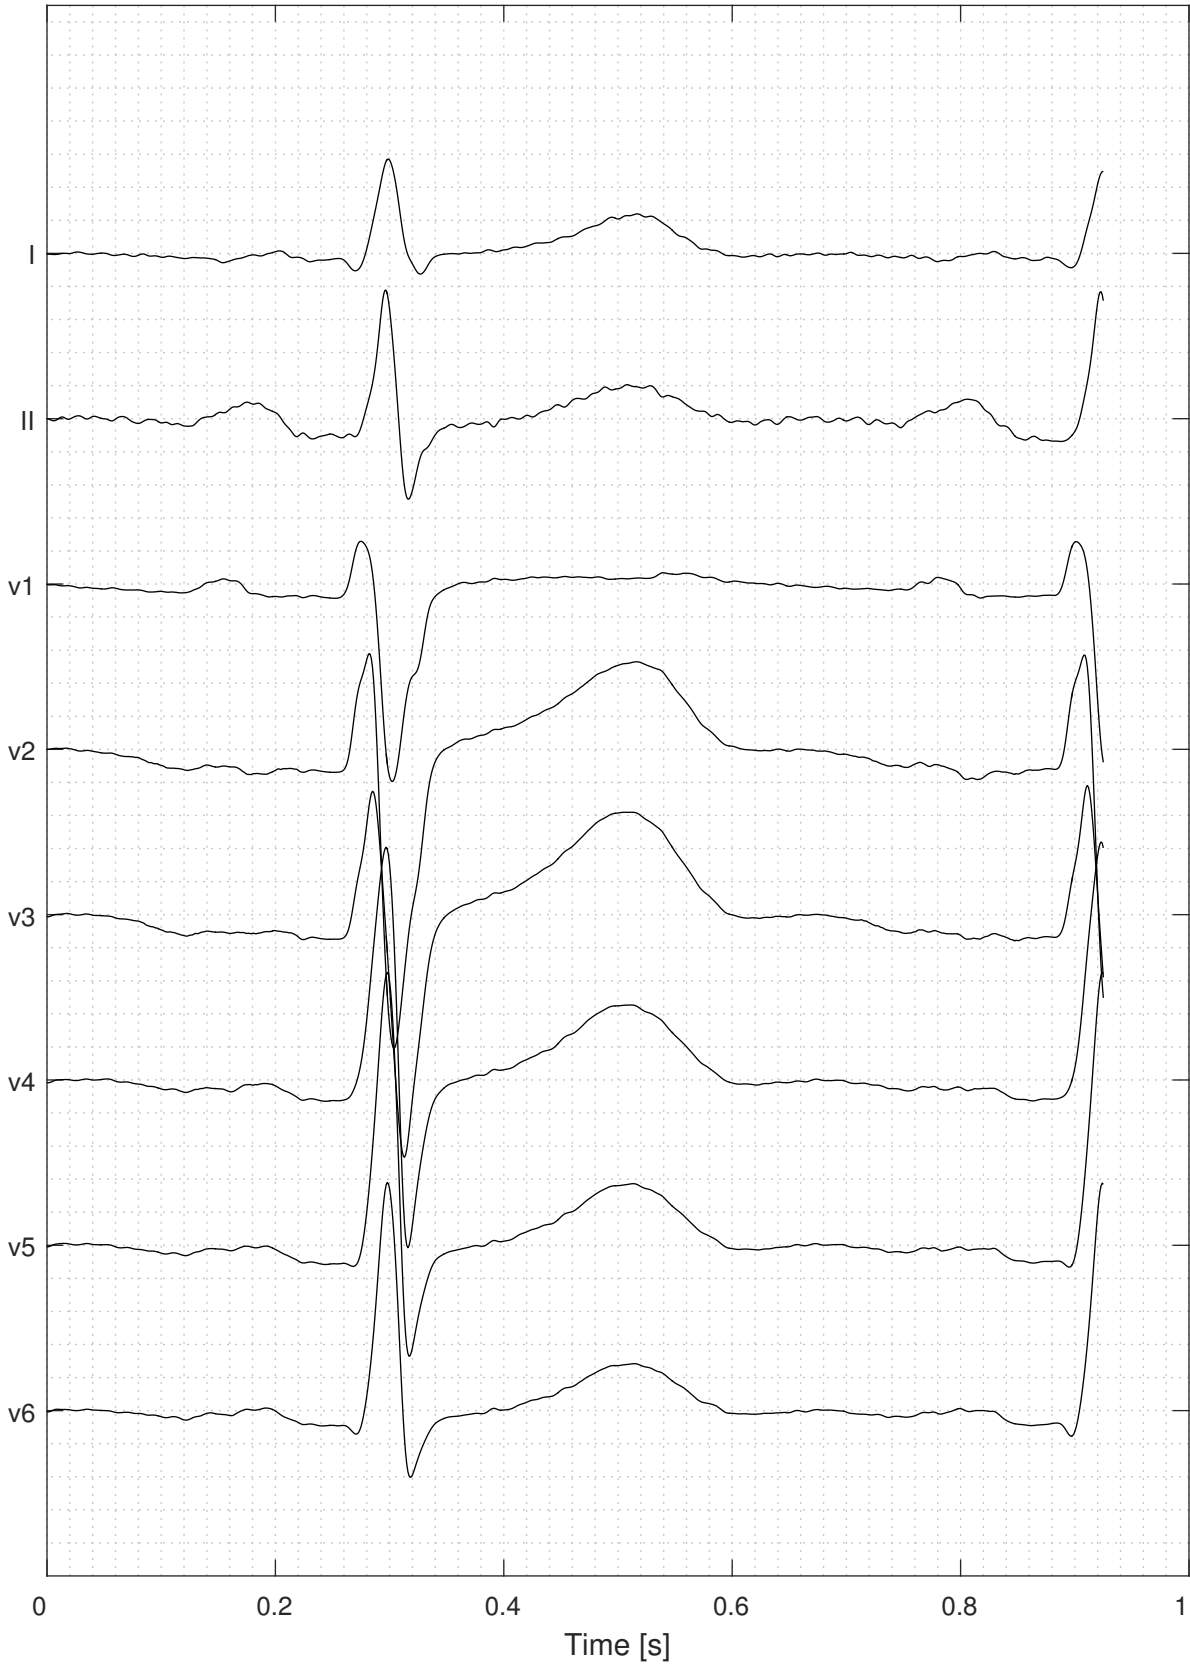

Mid RR, Complex #: 220

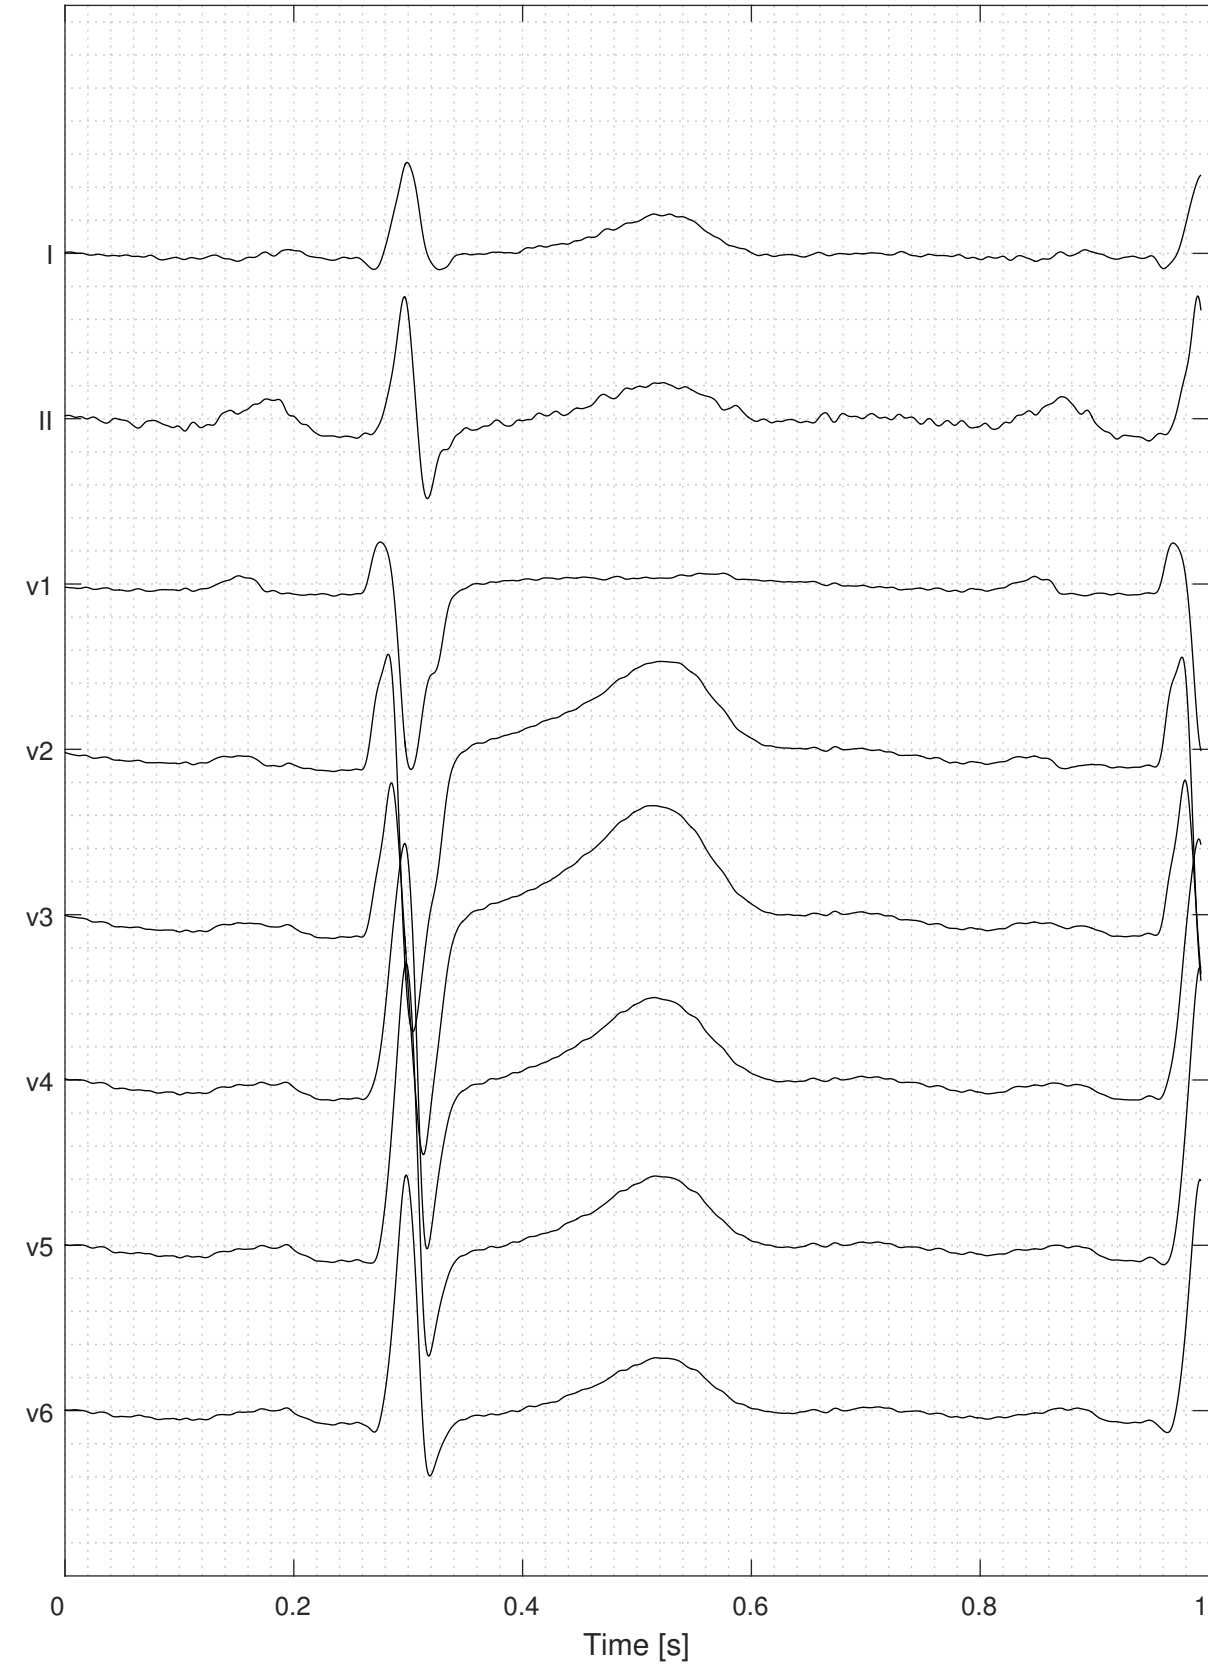

High RR, Complex #: 21

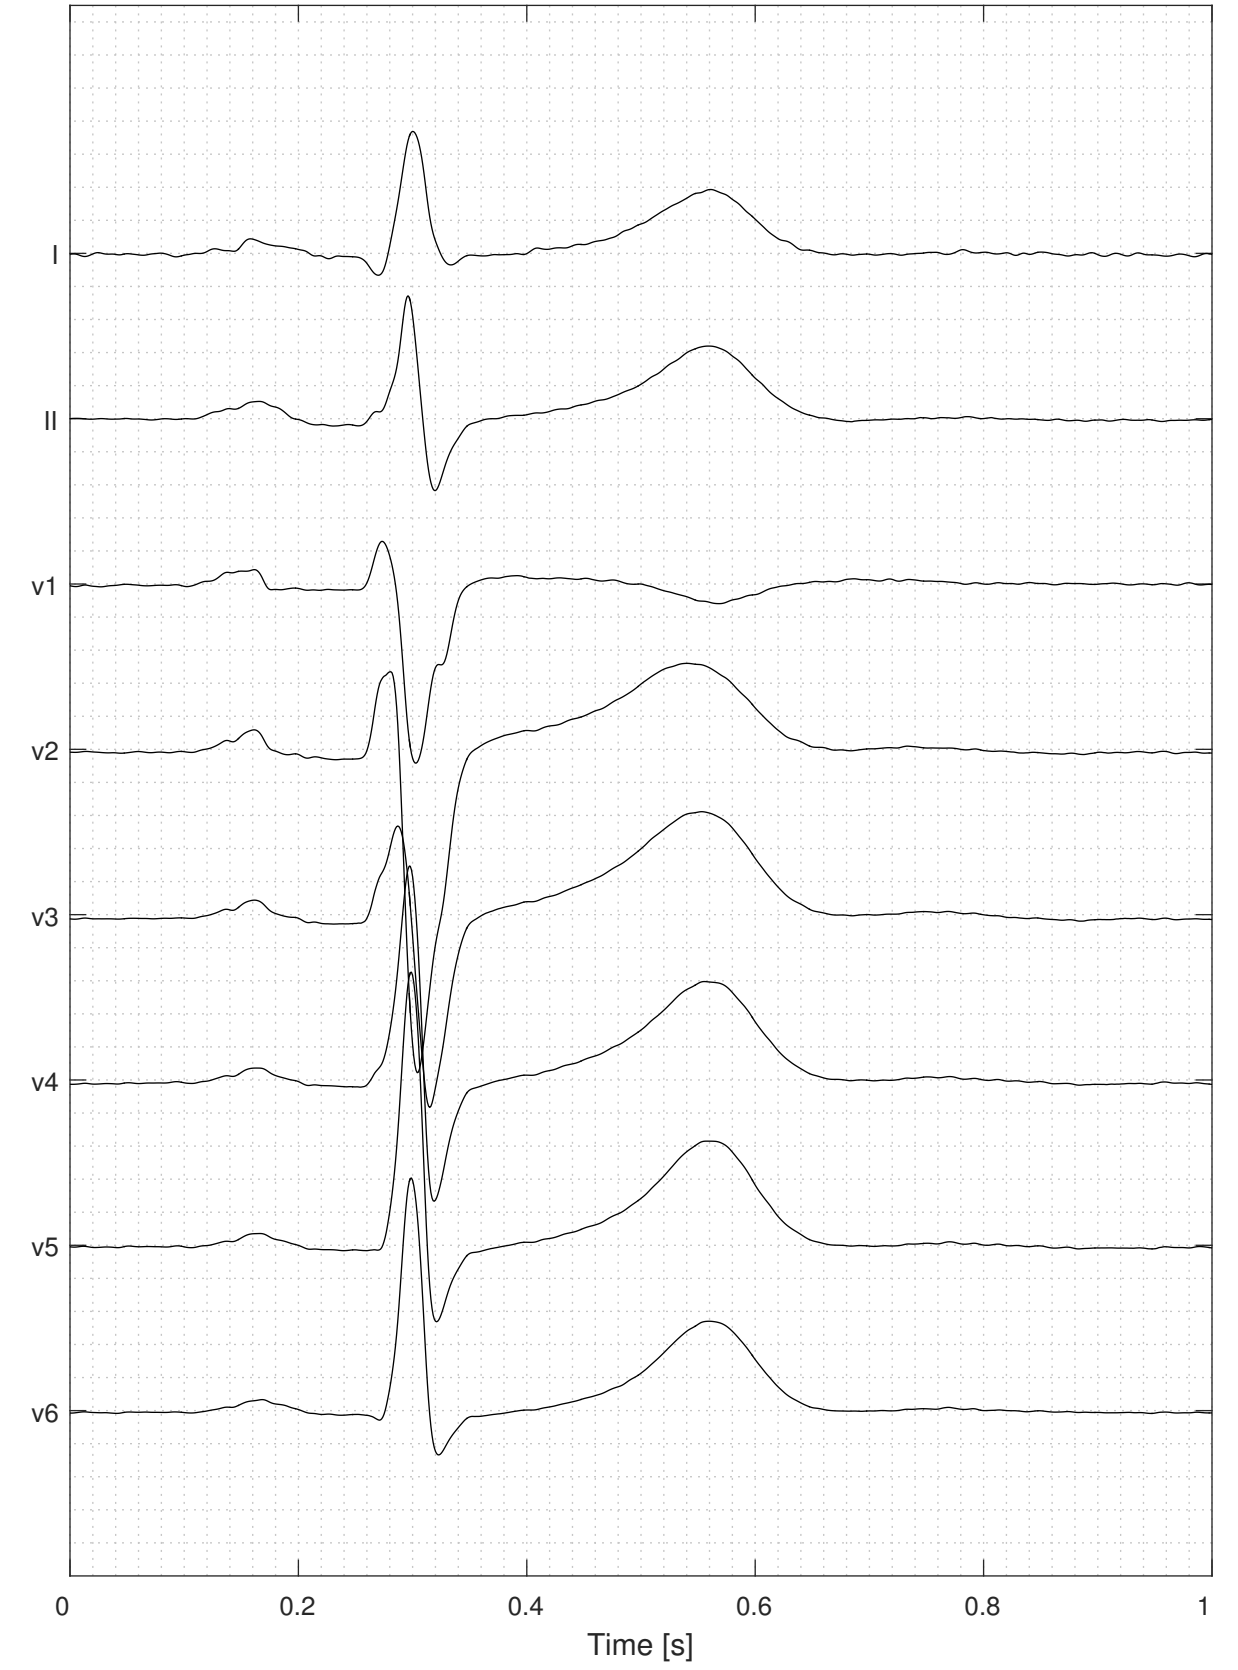

Patient 18

Low RR, Complex #: 174

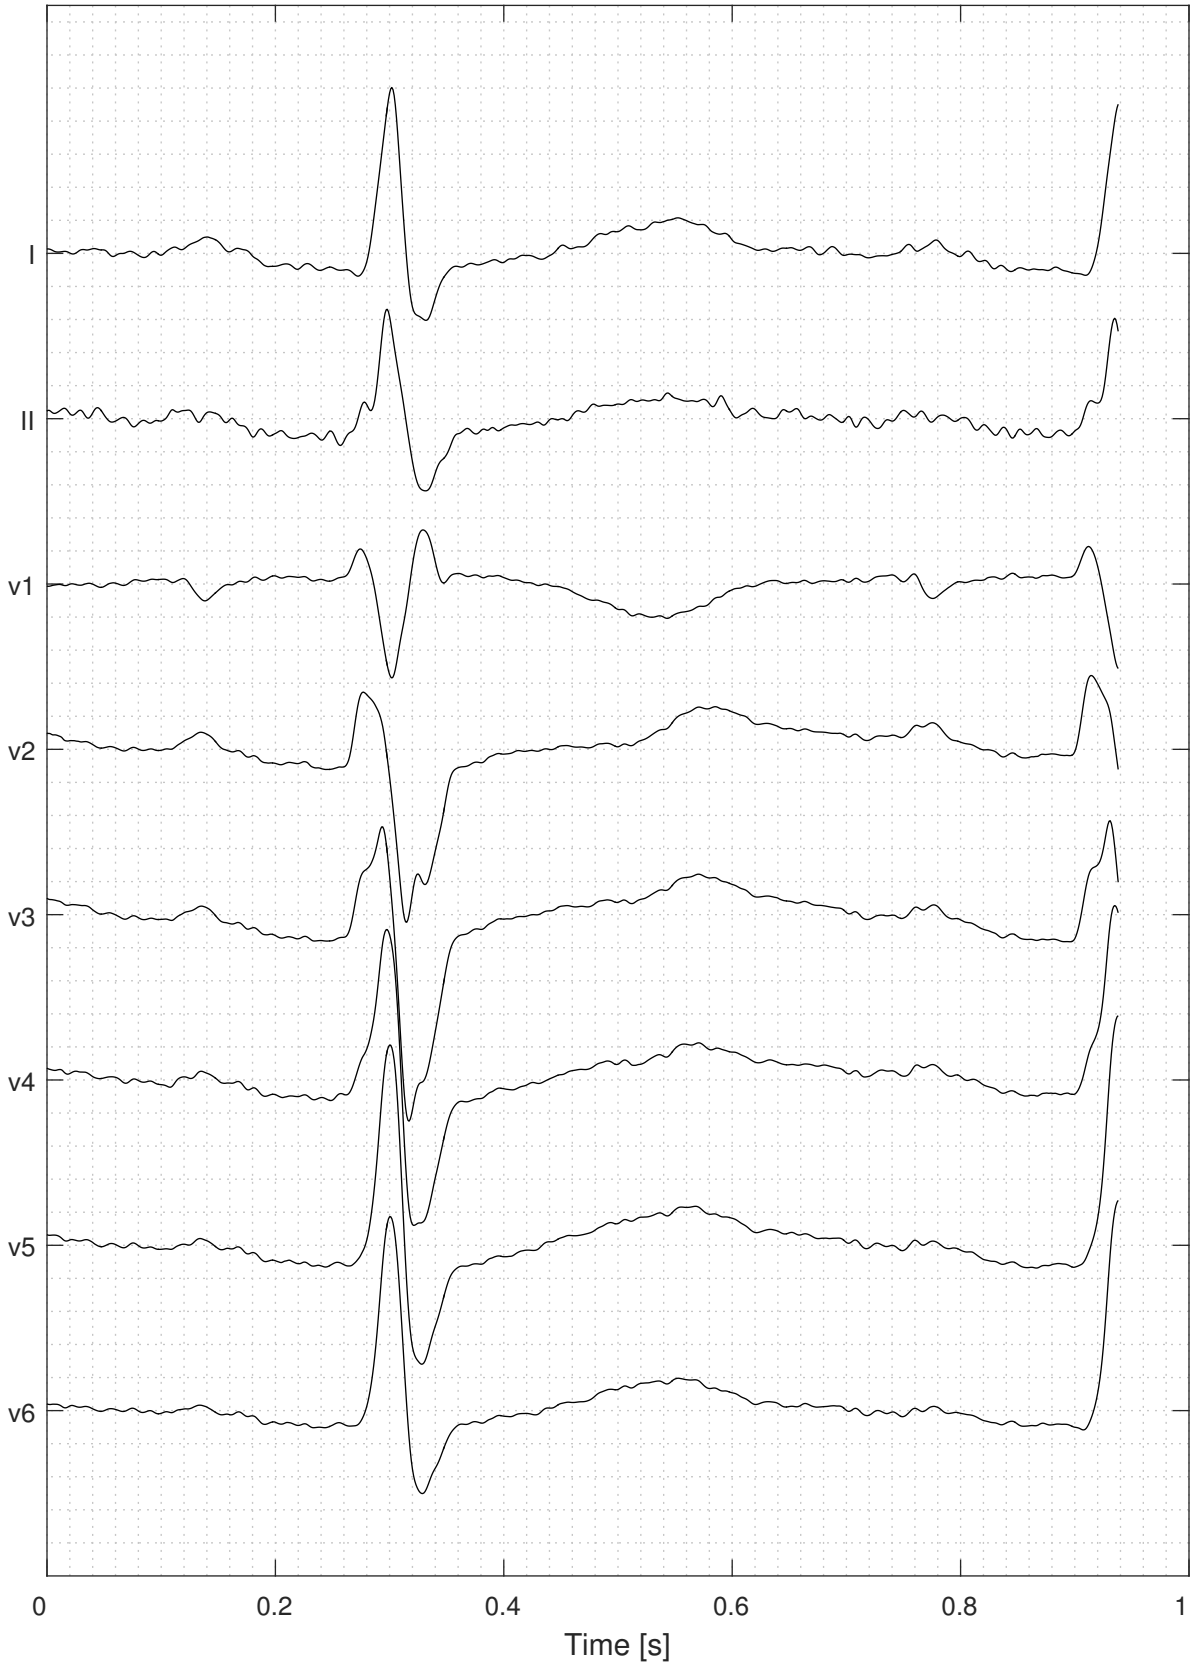

Mid RR, Complex #: 45

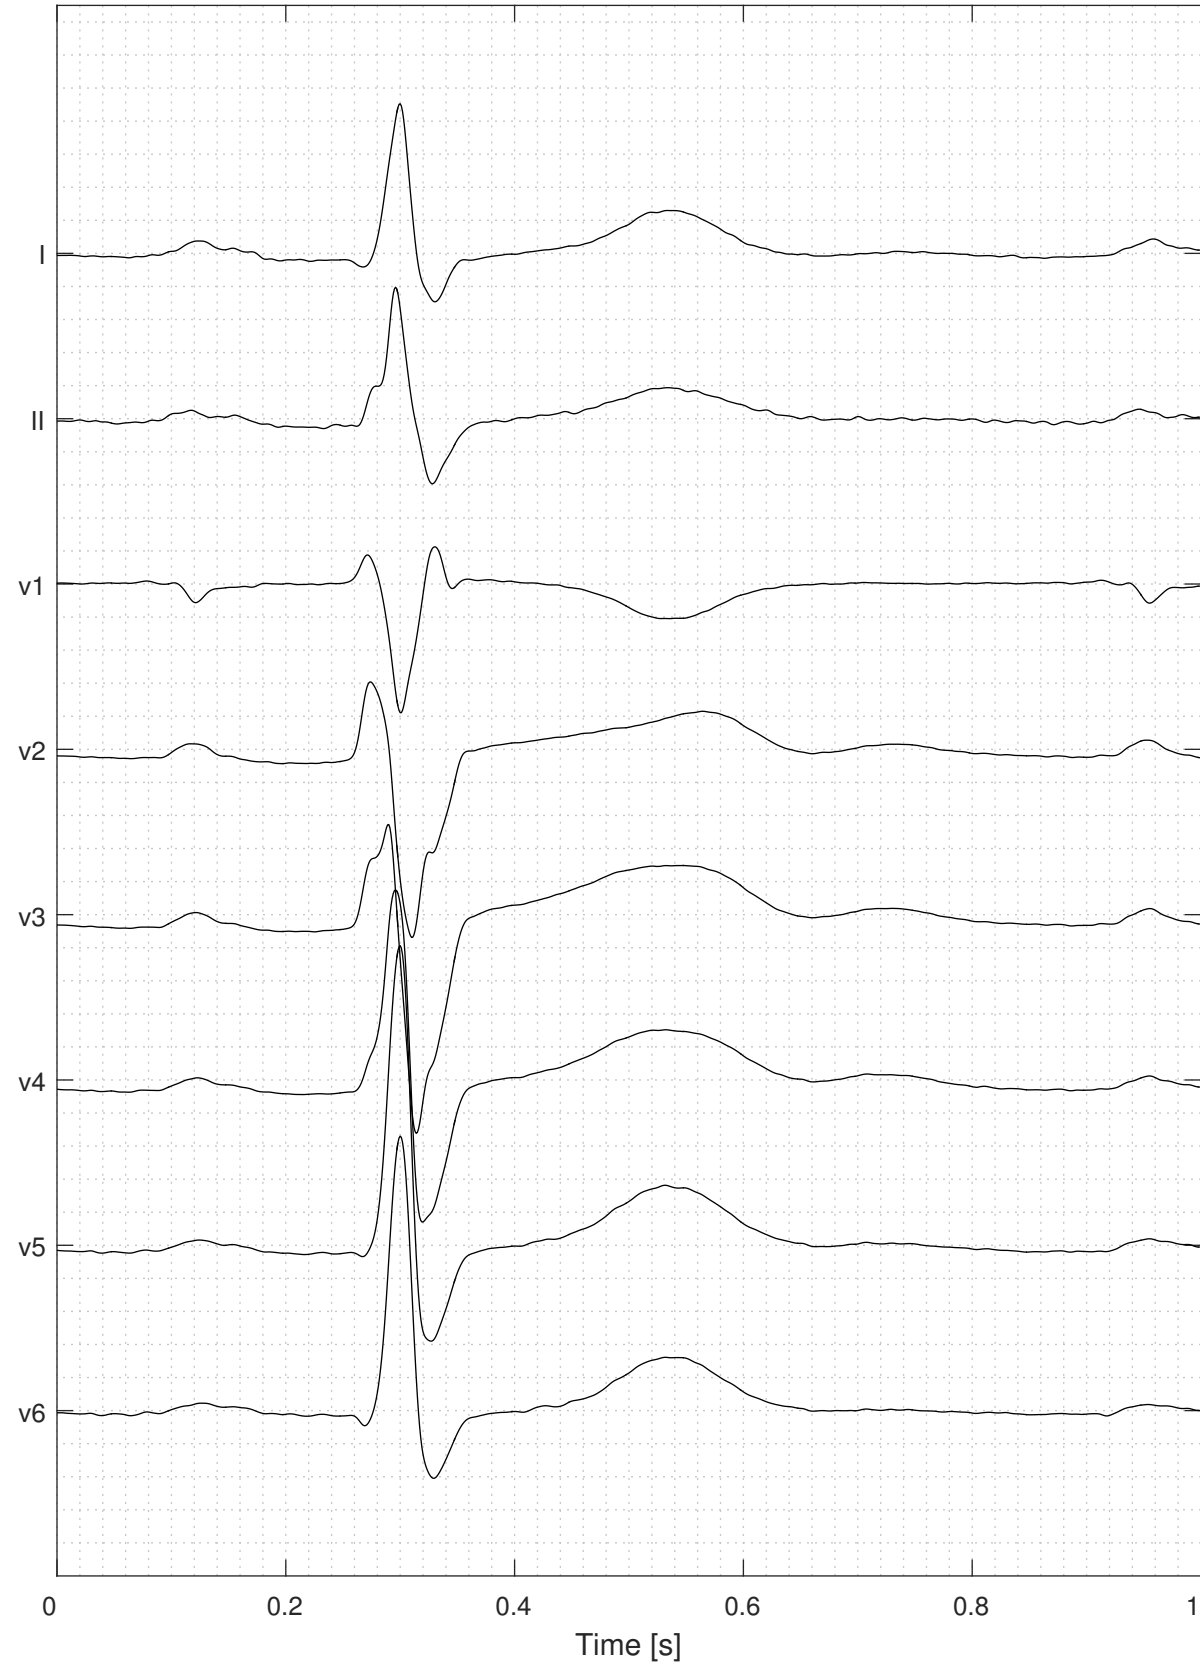

High RR, Complex #: 27

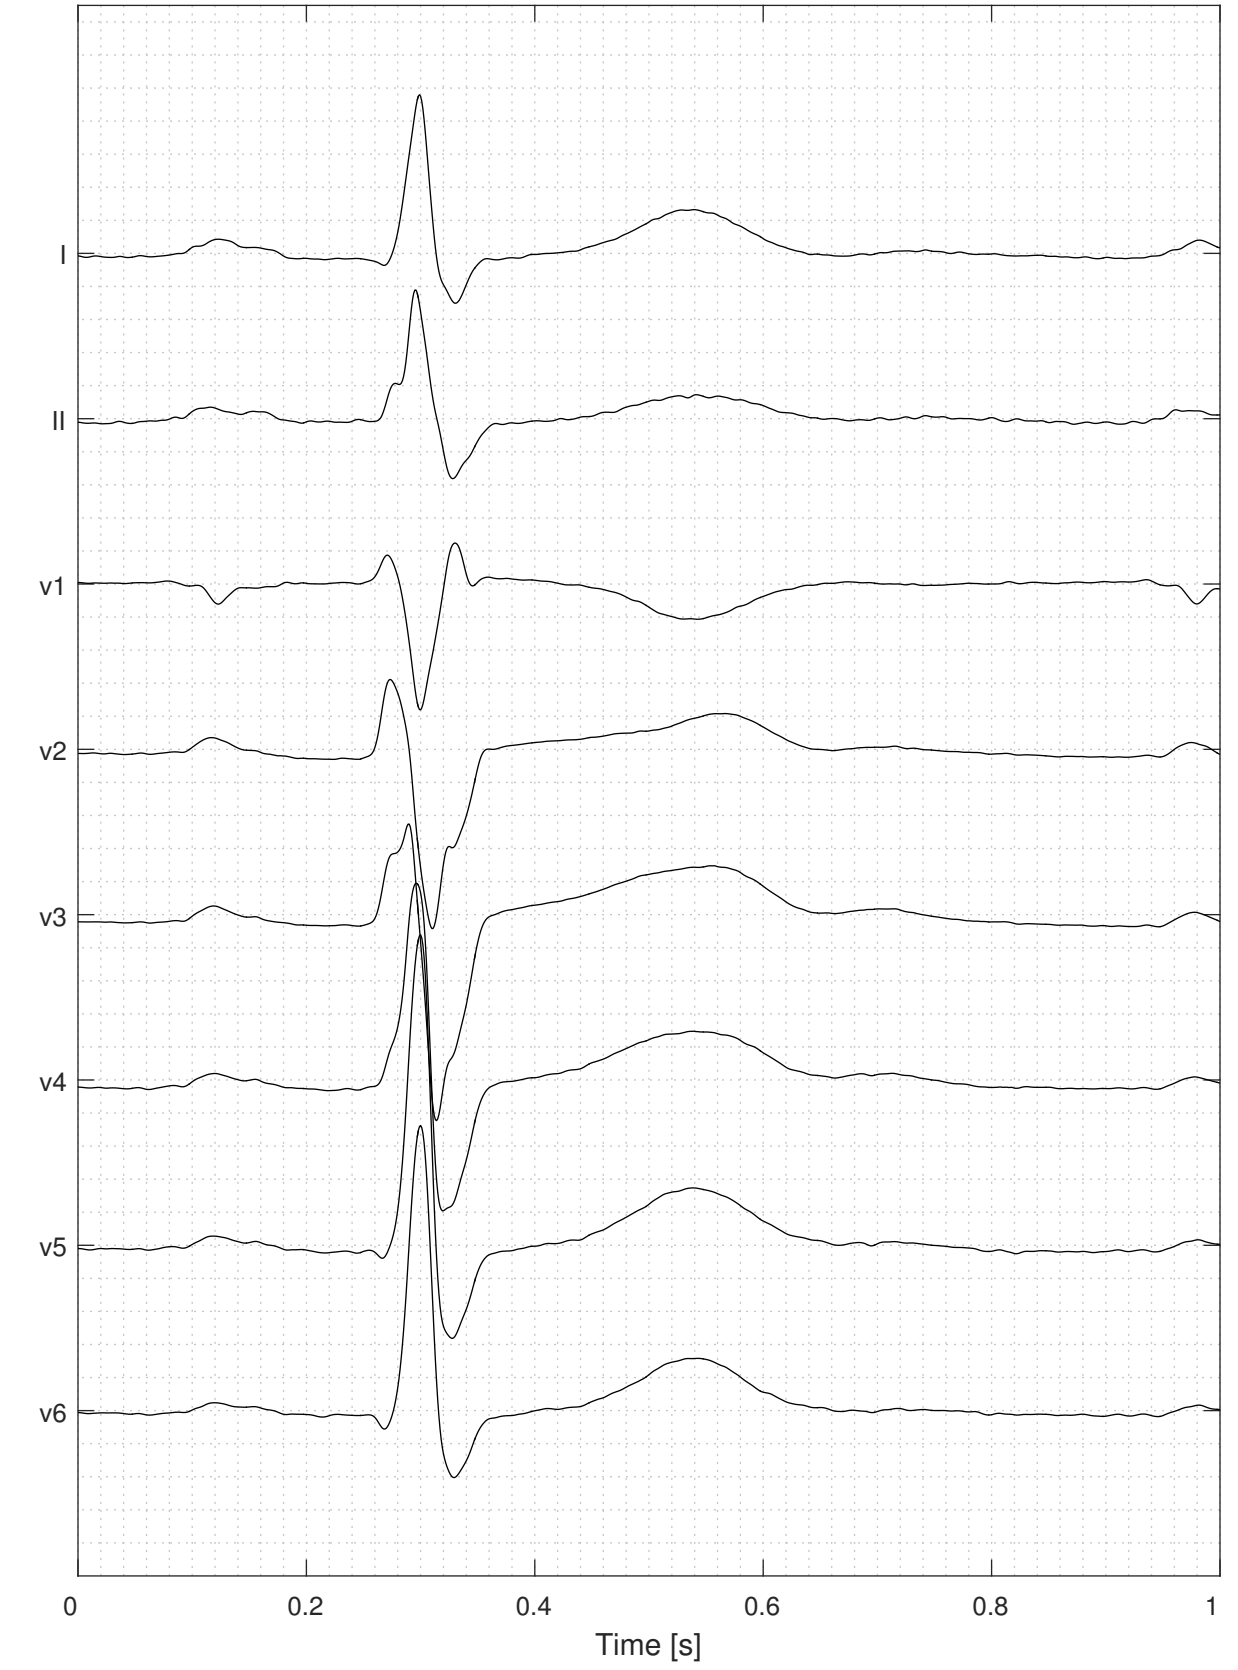

Patient 19

Low RR, Complex #: 355

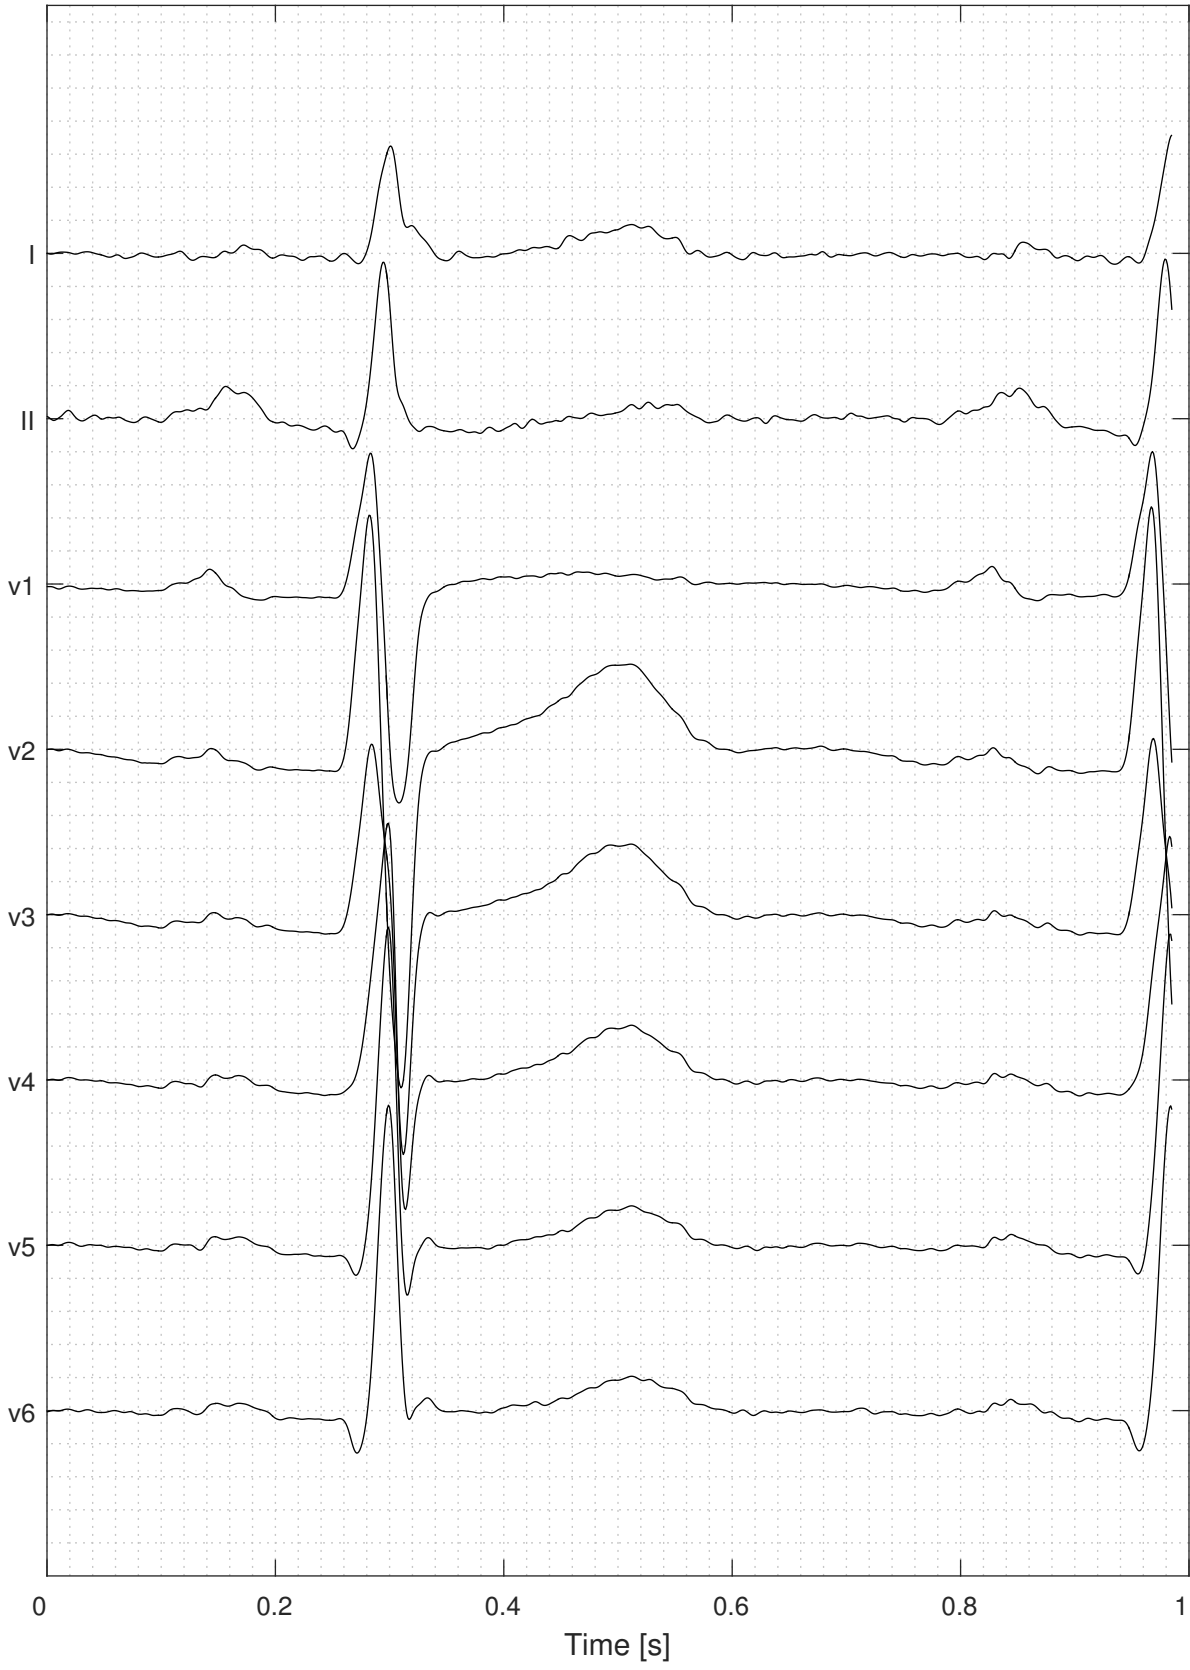

Mid RR, Complex #: 169

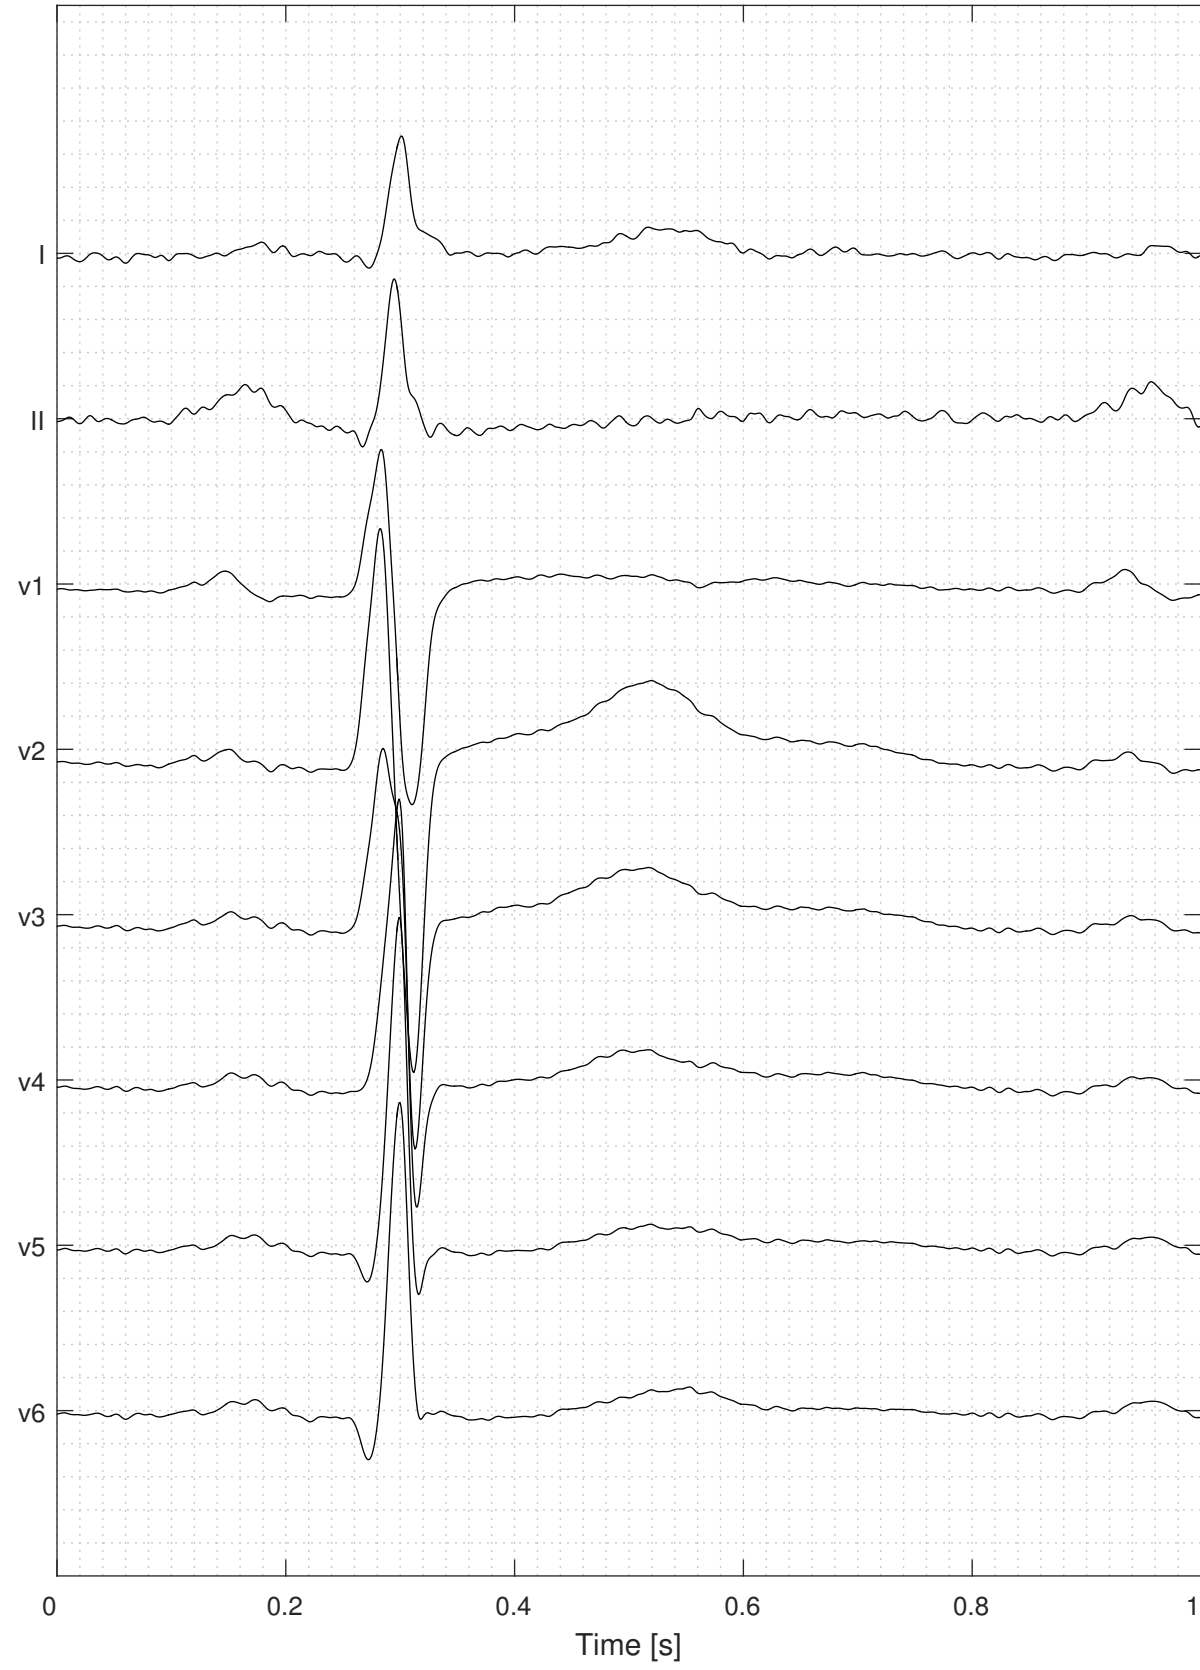

High RR, Complex #: 34

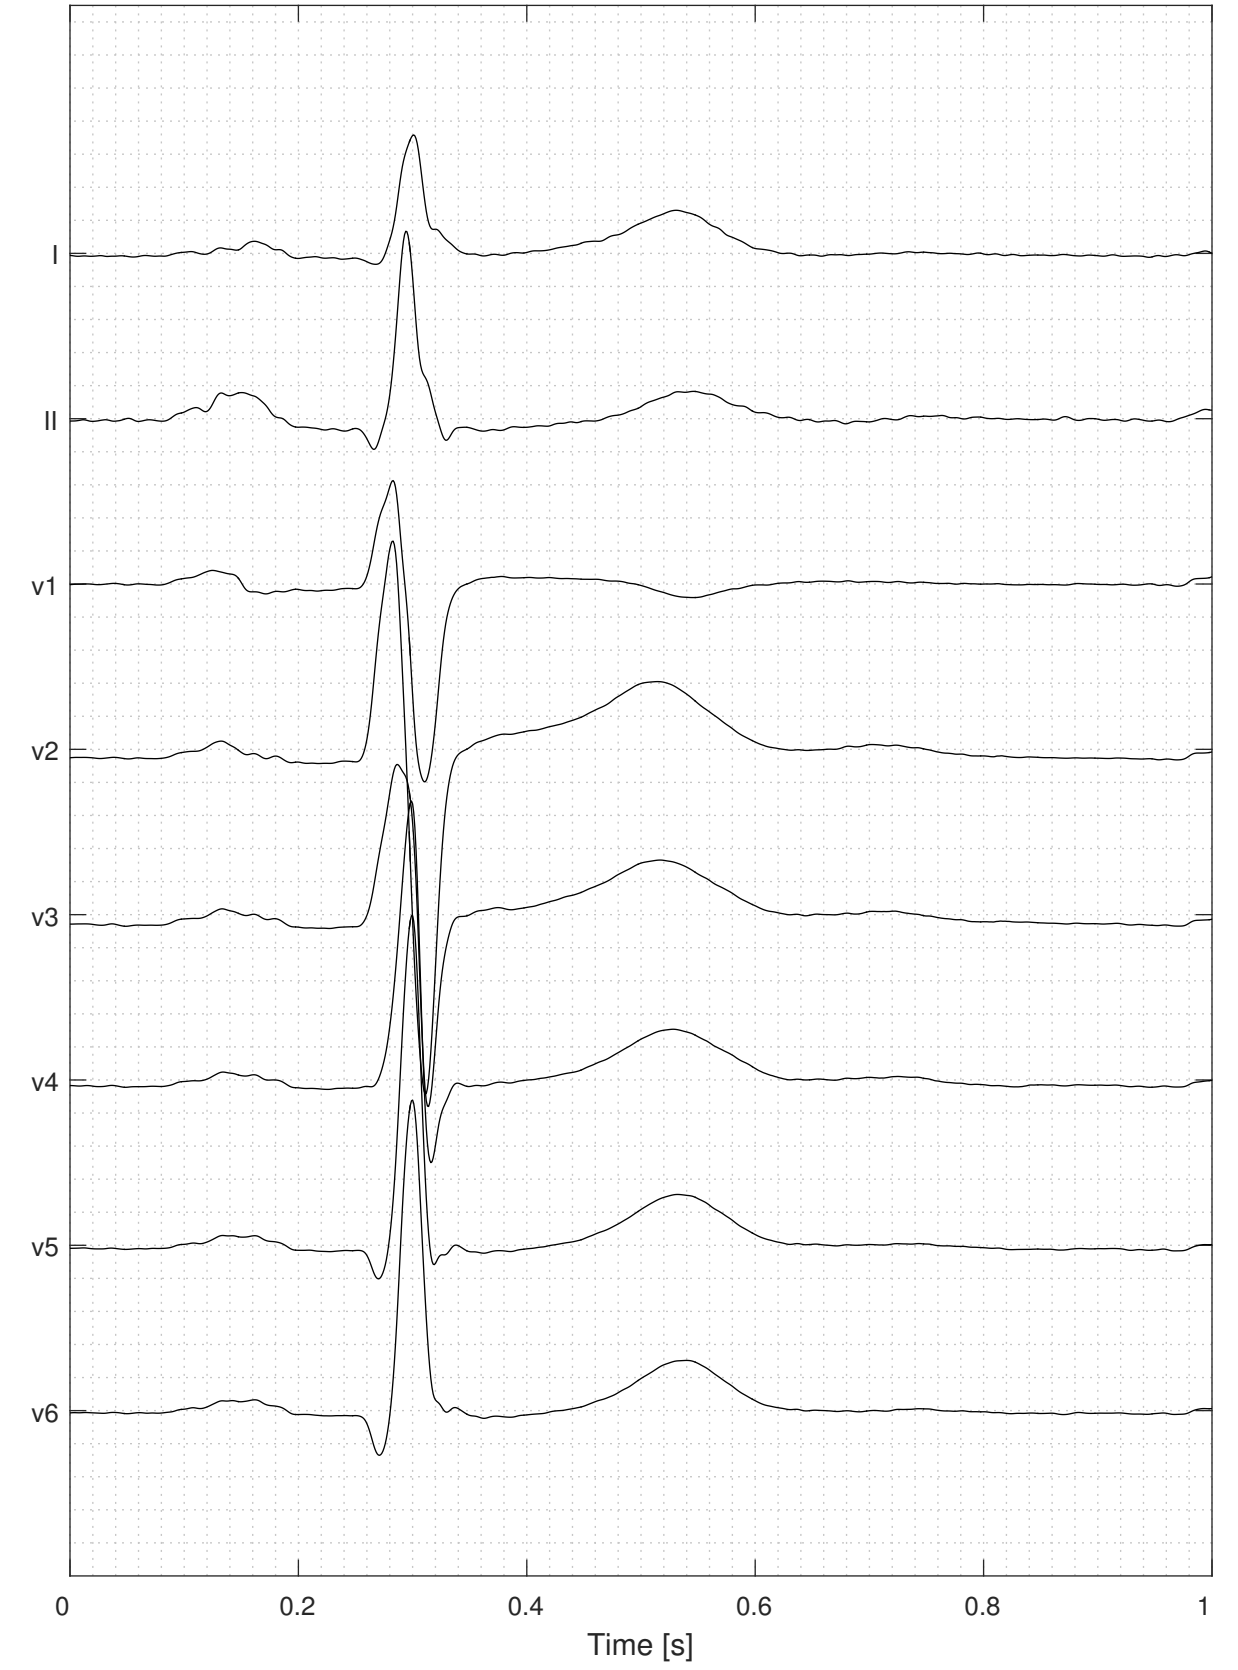

Patient 20

Low RR, Complex #: 233

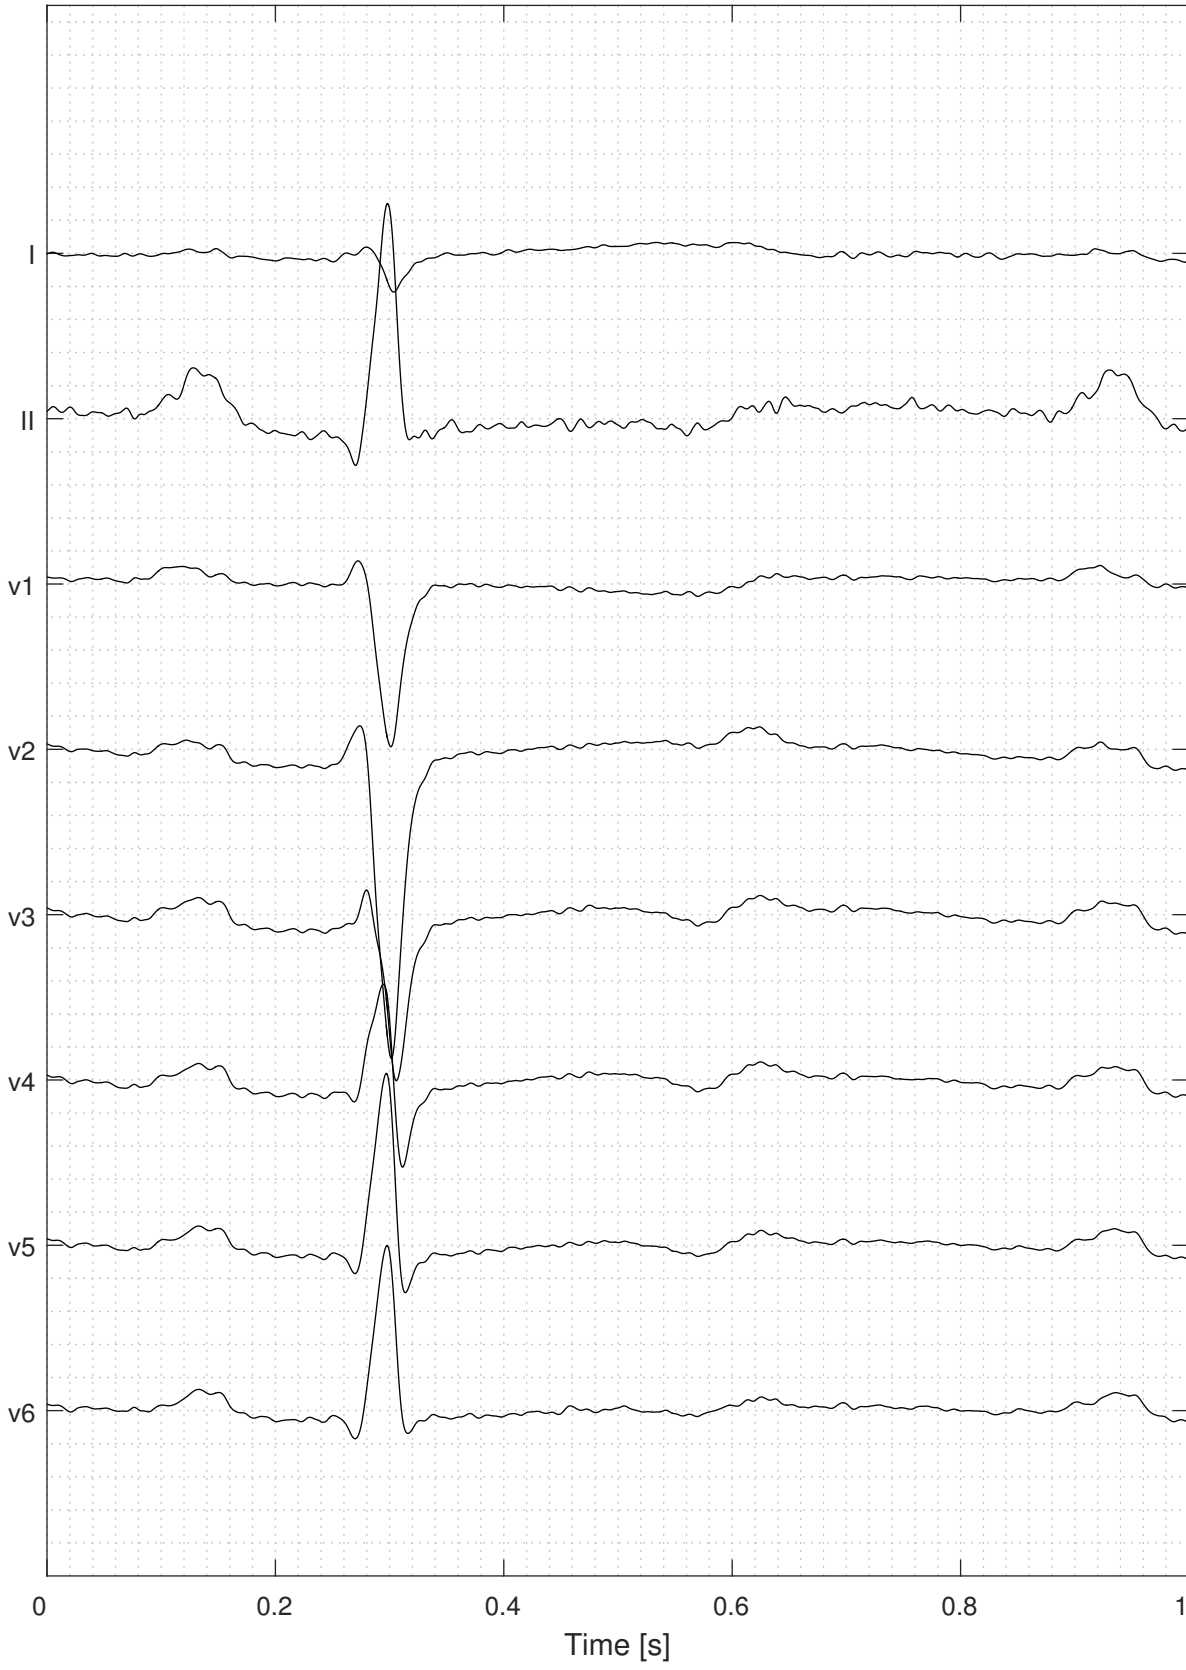

Mid RR, Complex #: 166

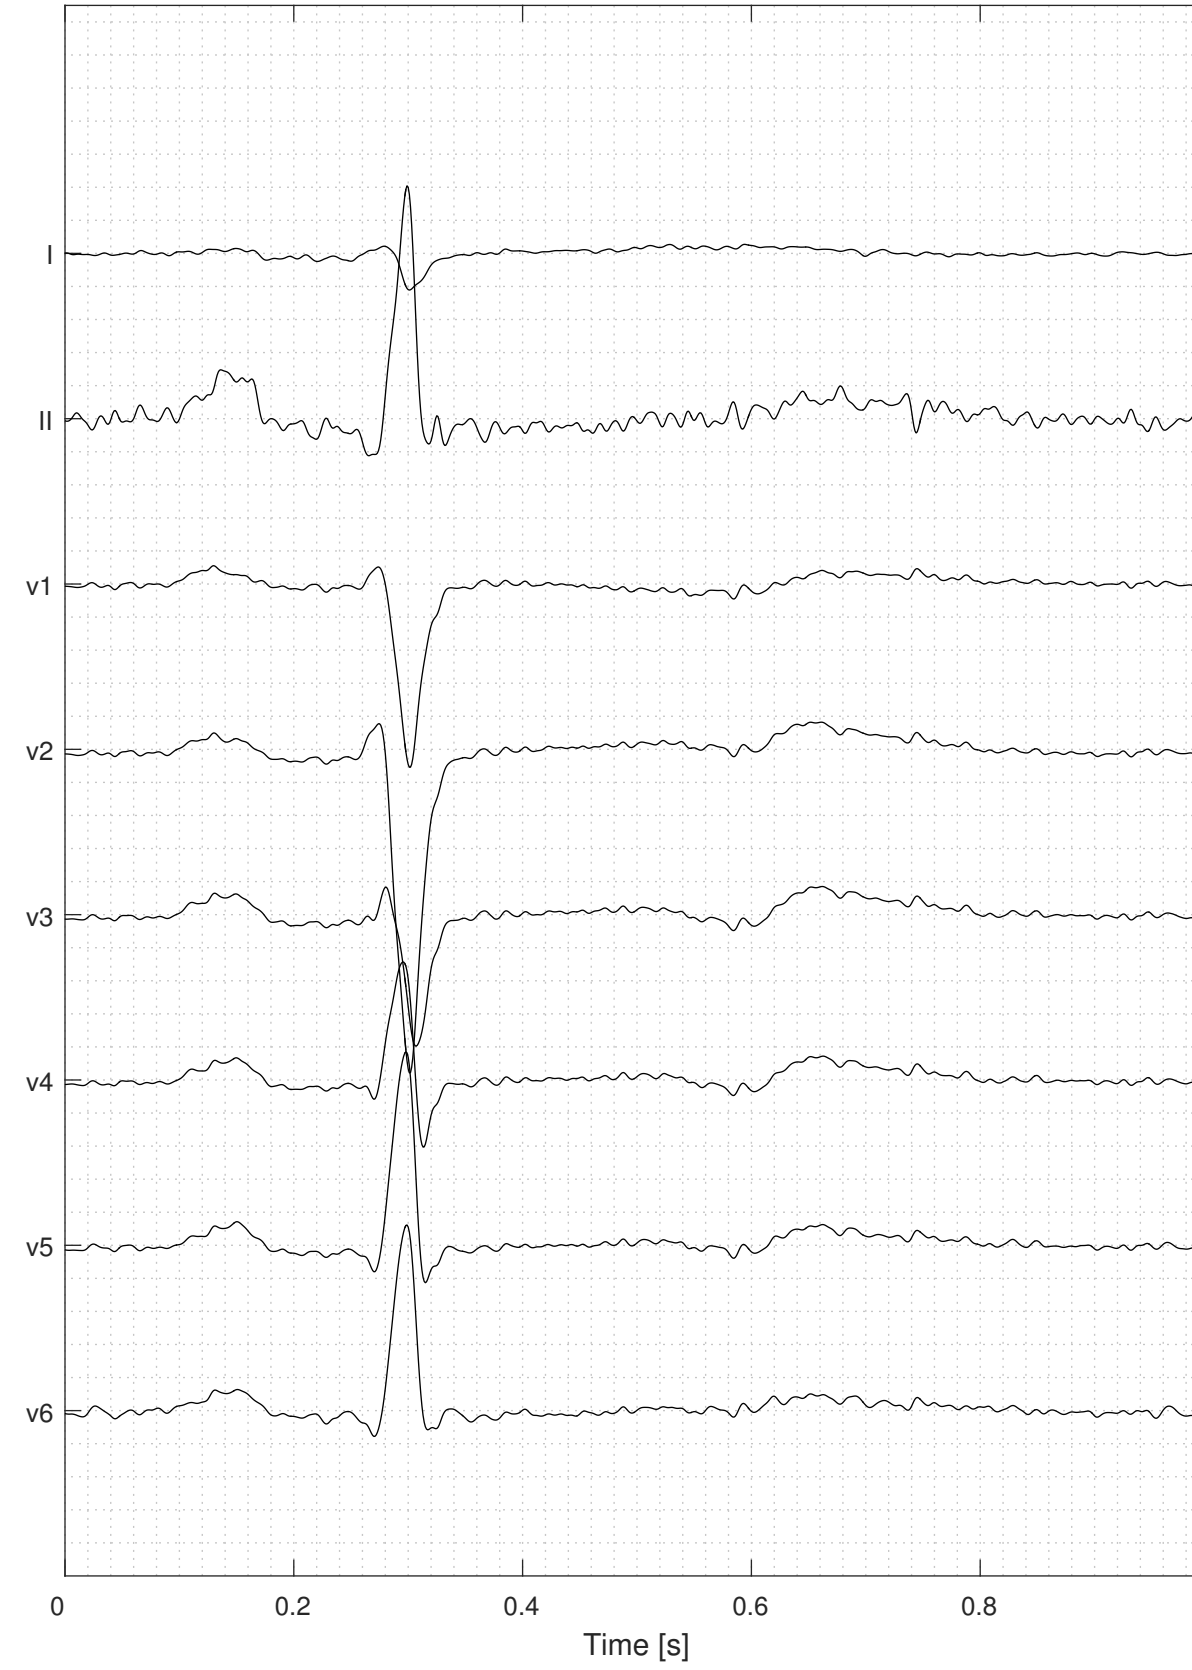

High RR, Complex #: 42

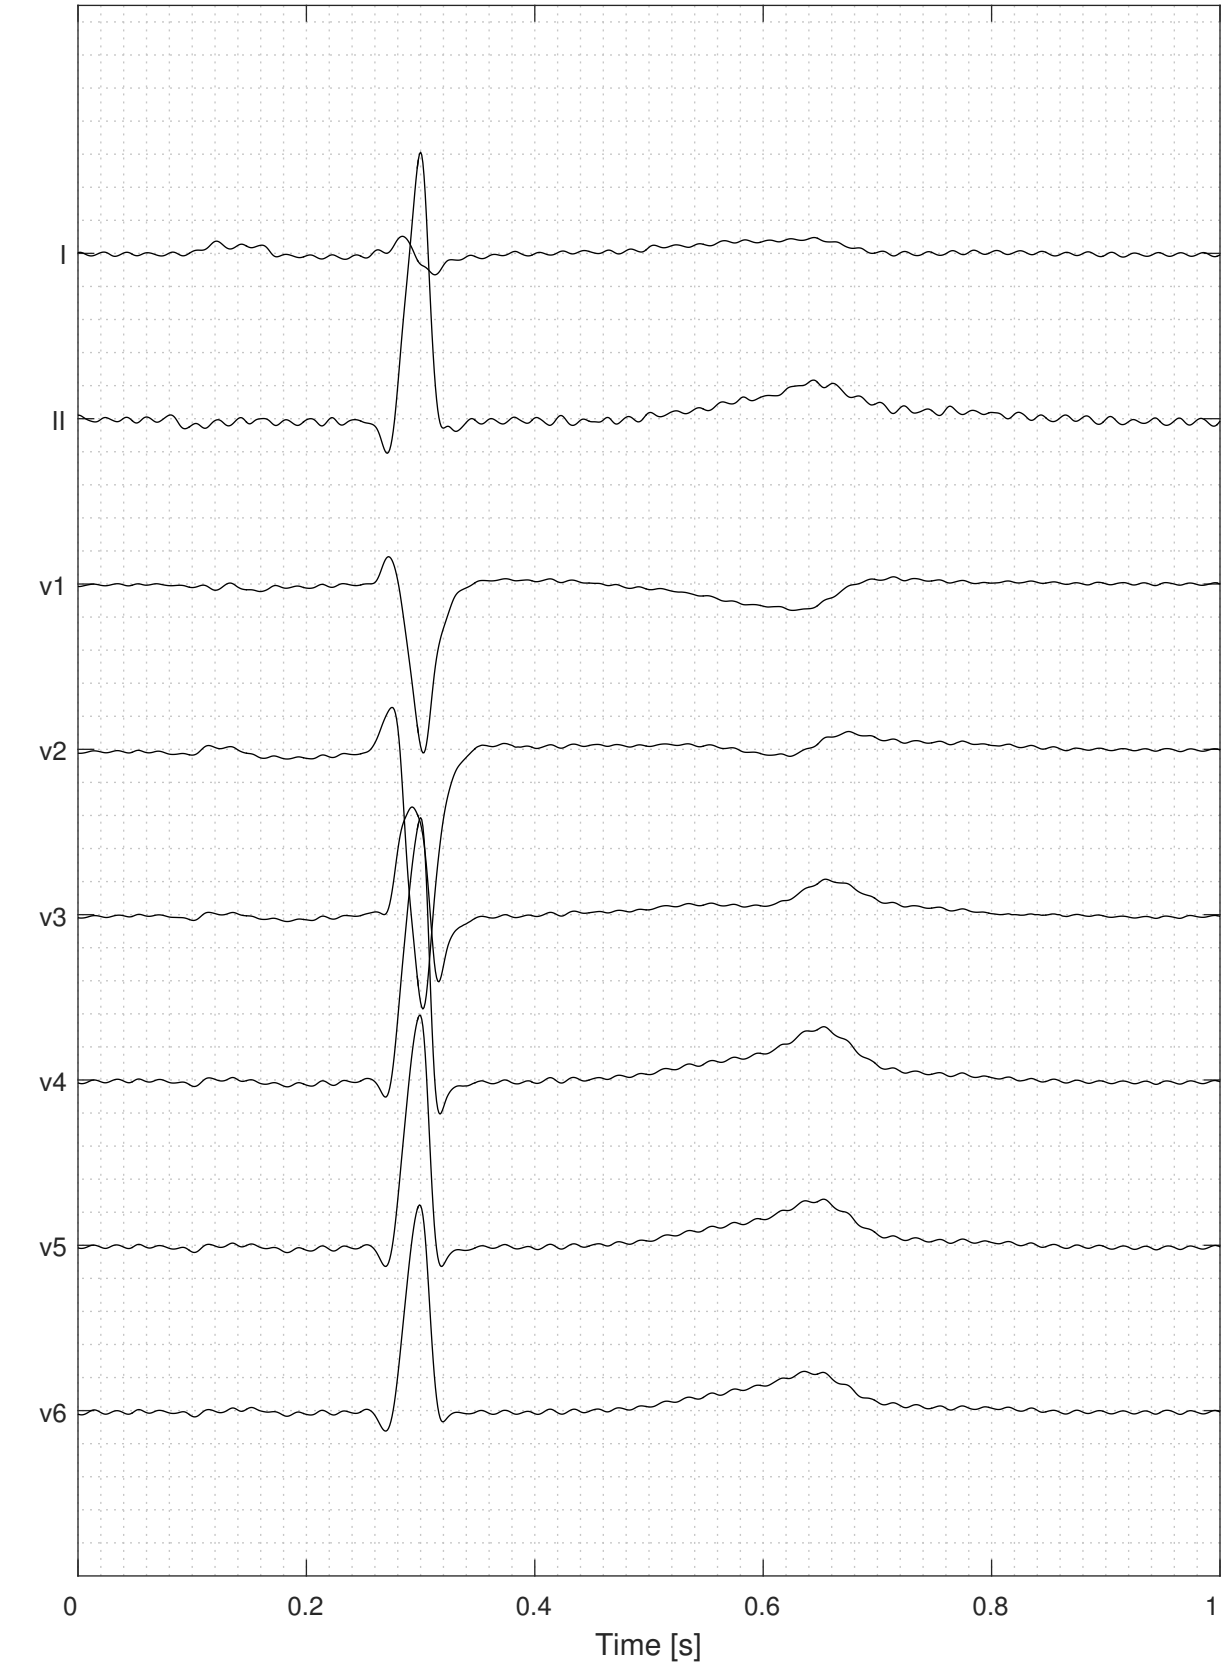

Patient 21

Low RR, Complex #: 2

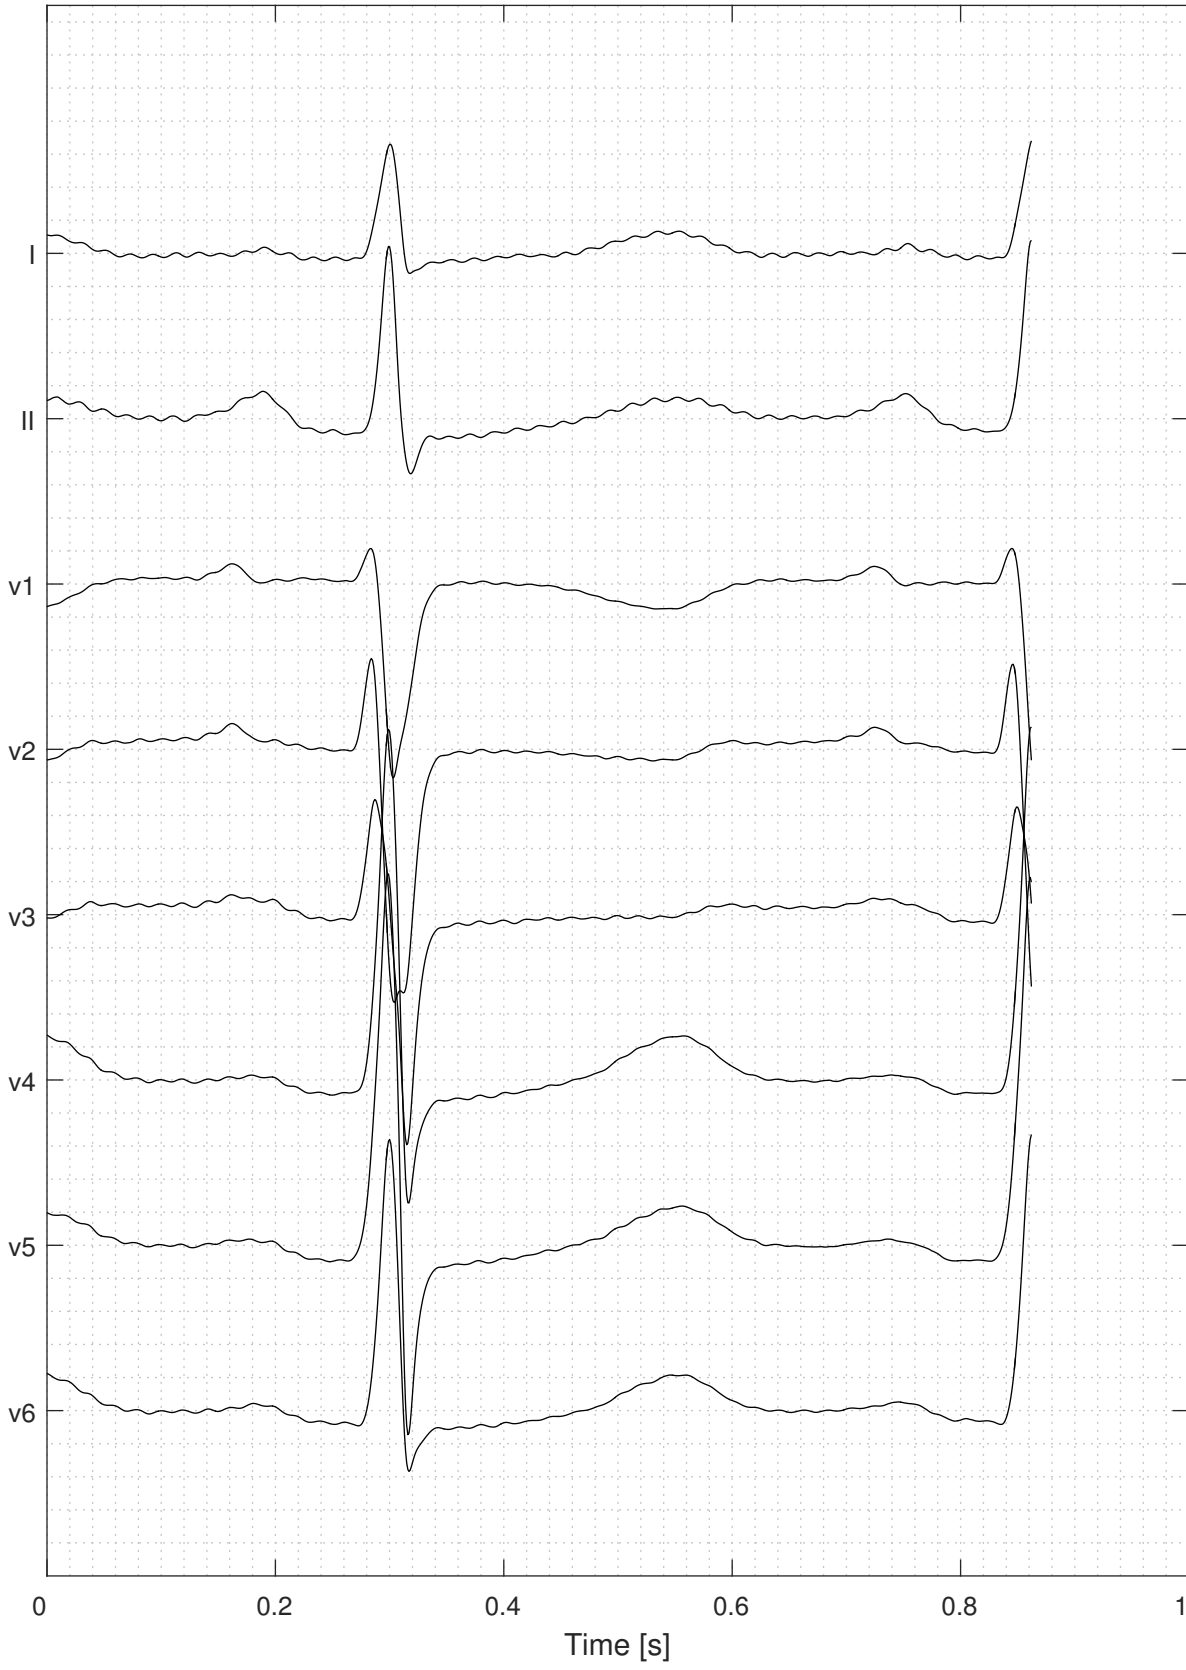

Mid RR, Complex #: 373

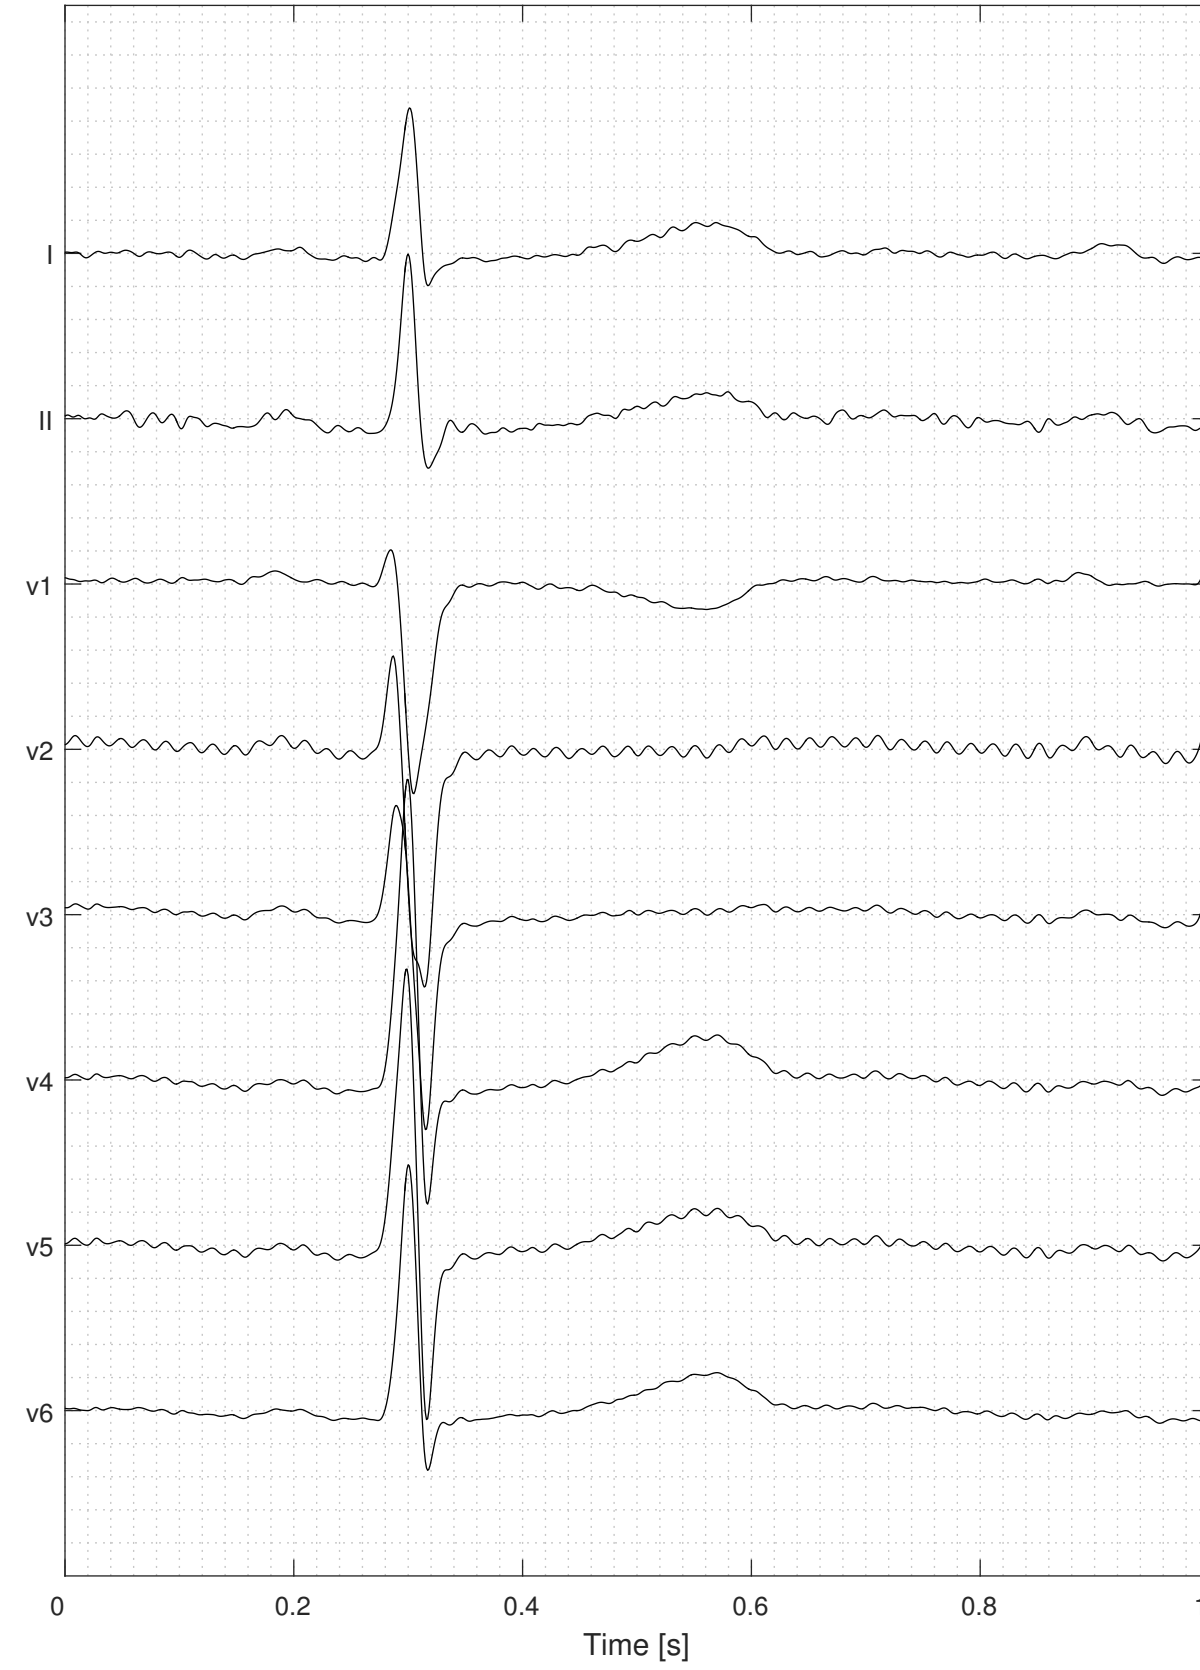

High RR, Complex #: 249

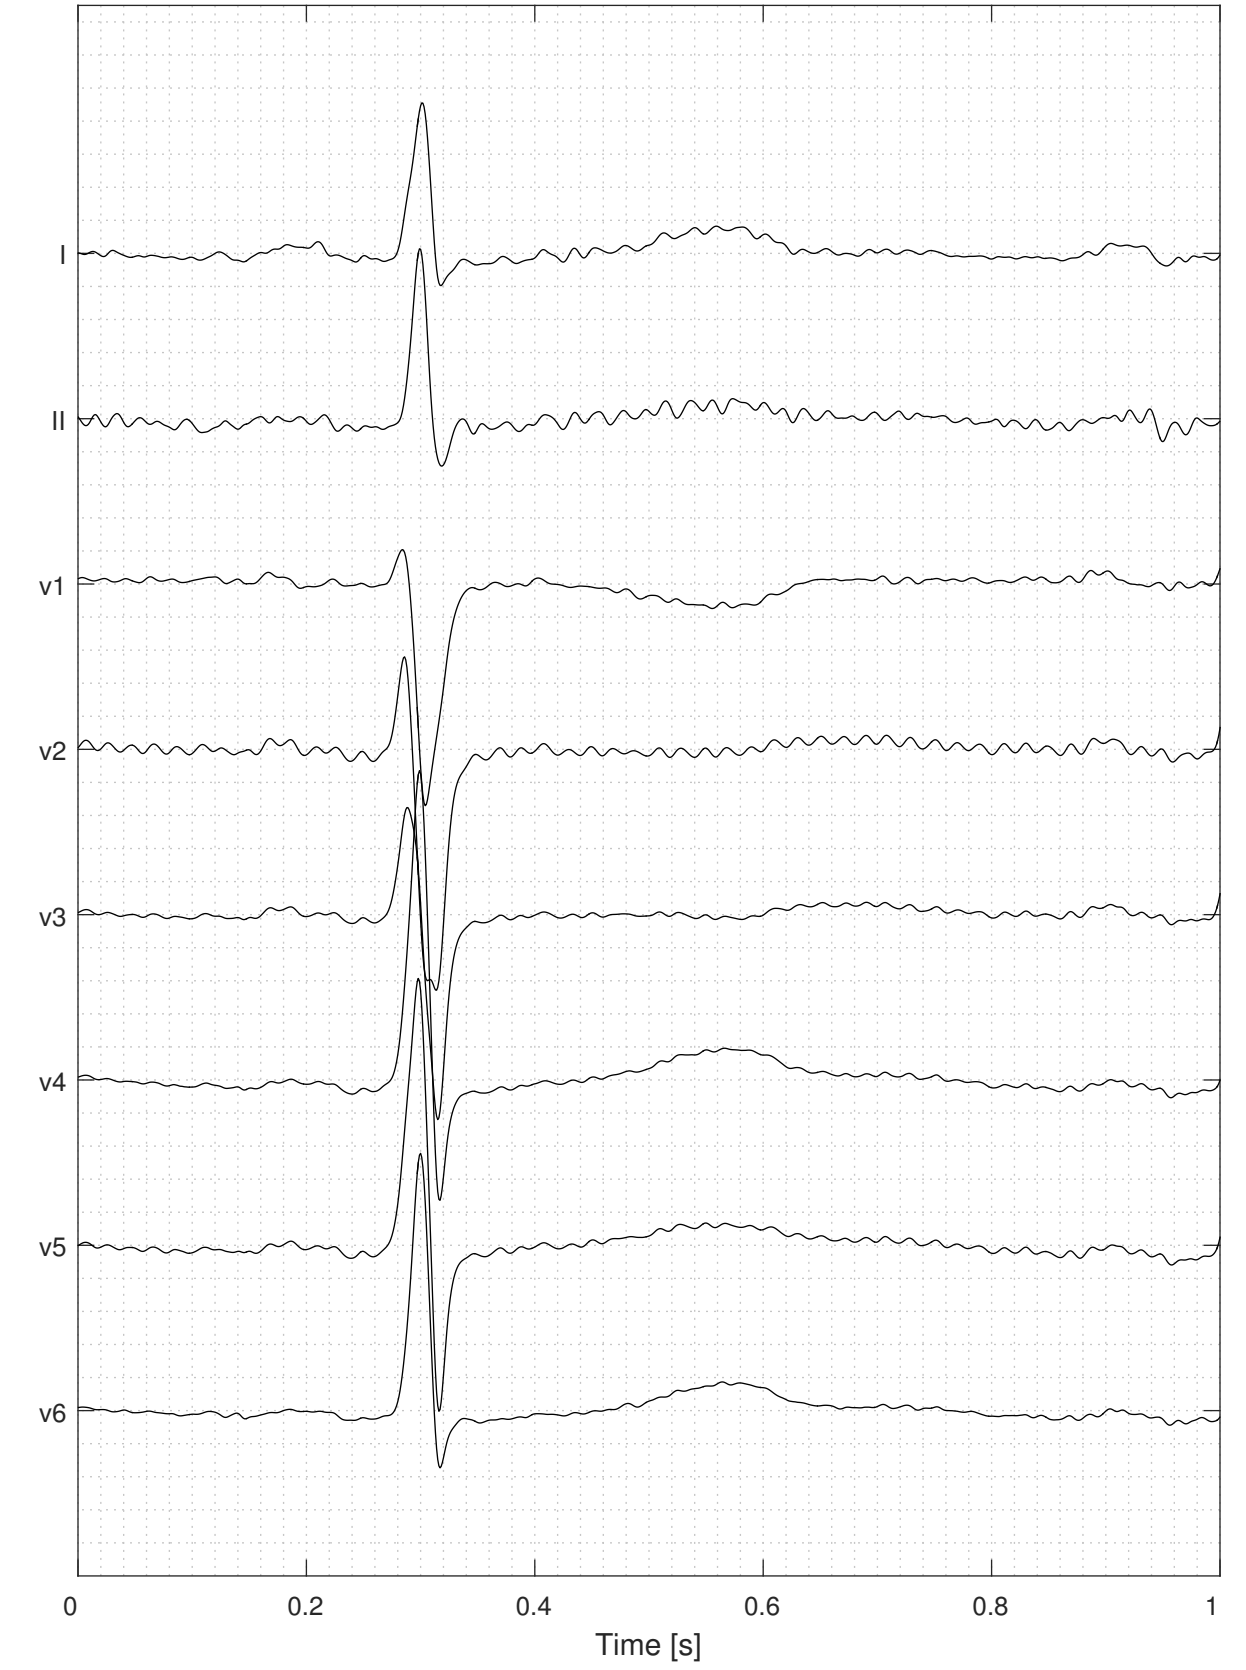

Patient 22

Low RR, Complex #: 268

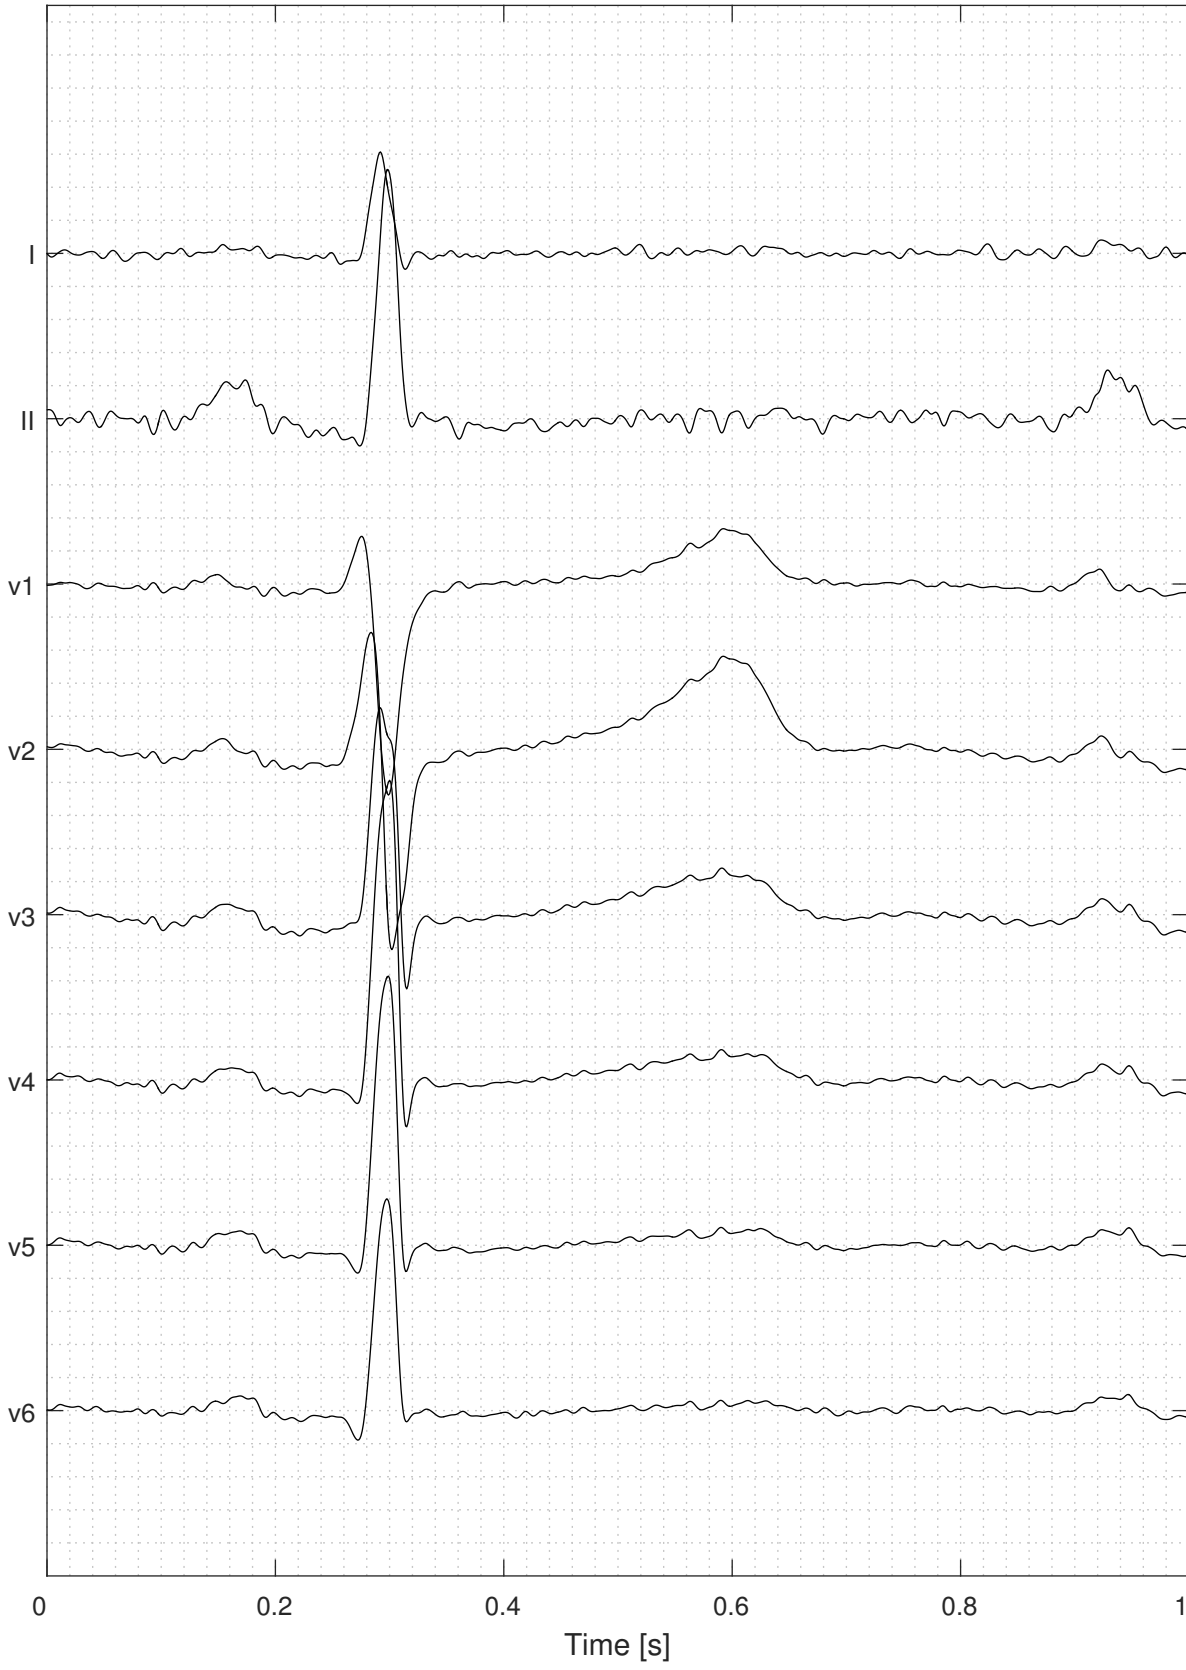

Mid RR, Complex #: 143

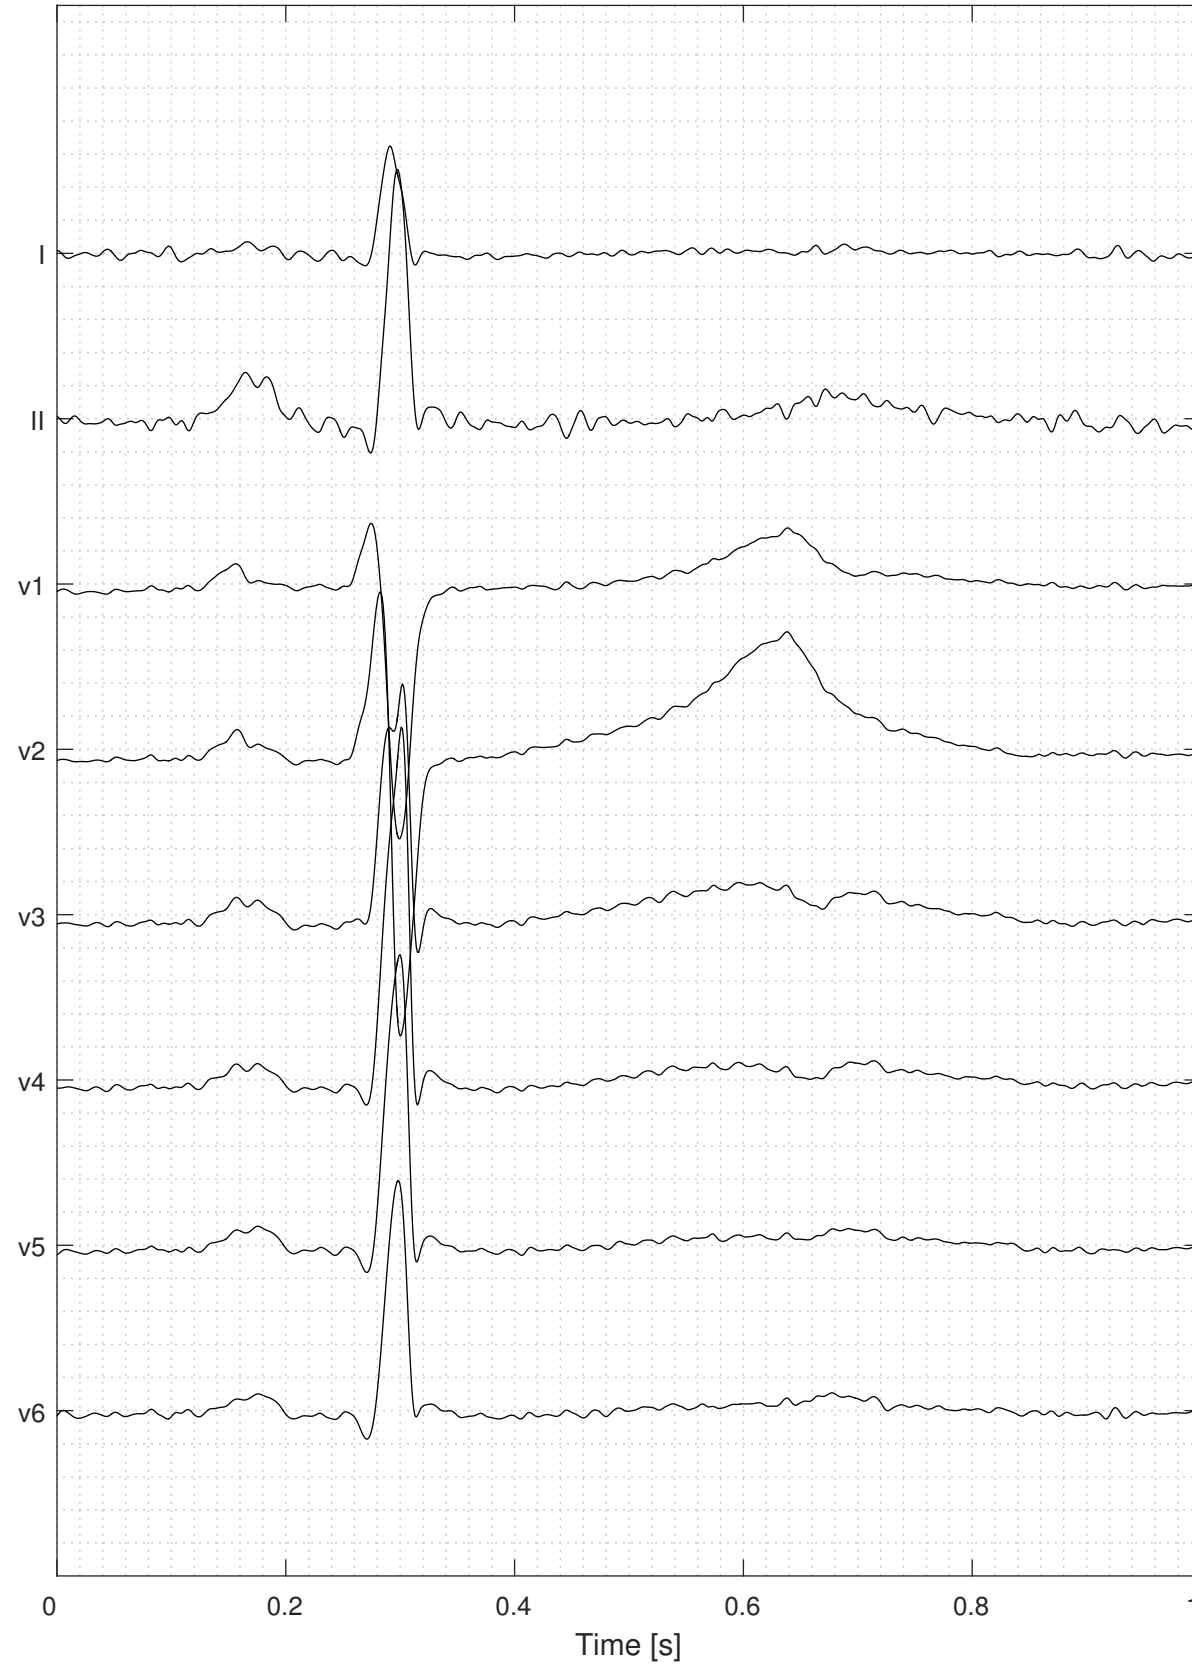

High RR, Complex #: 34

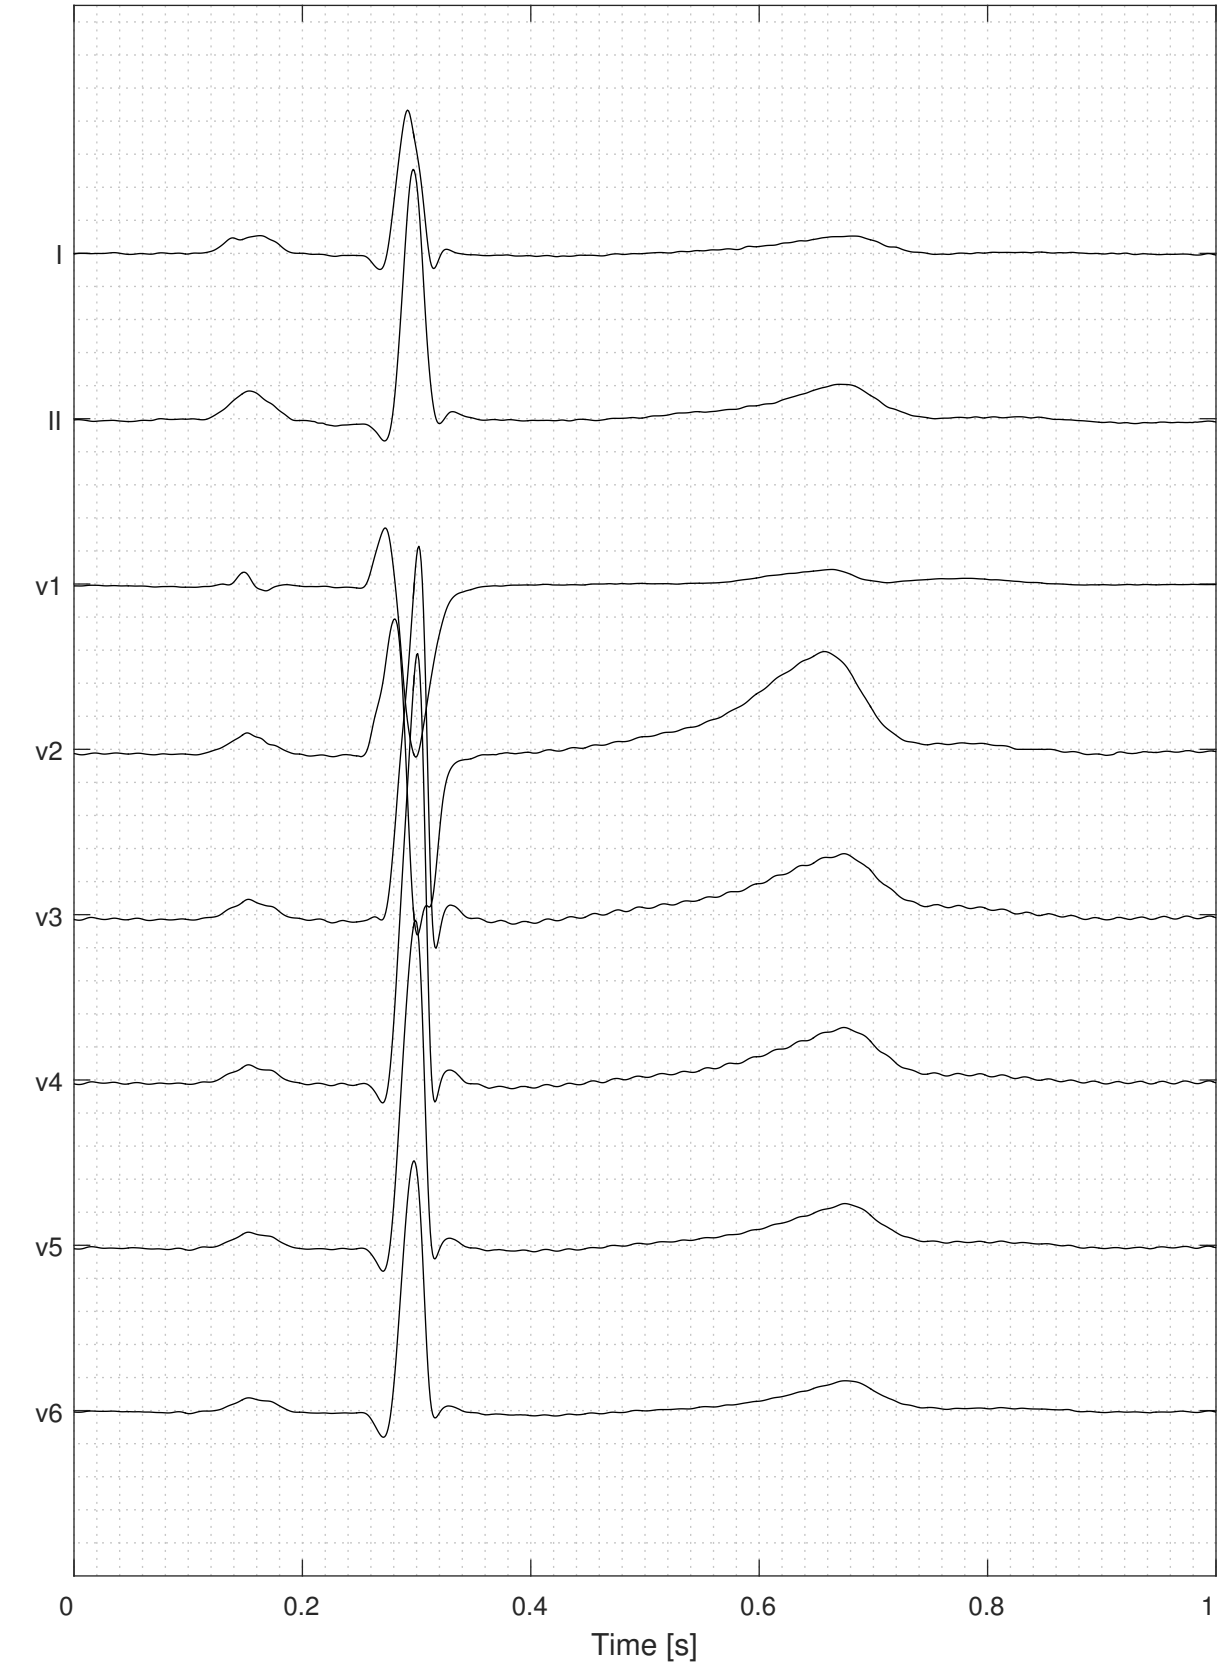

Patient 23

Low RR, Complex #: 123

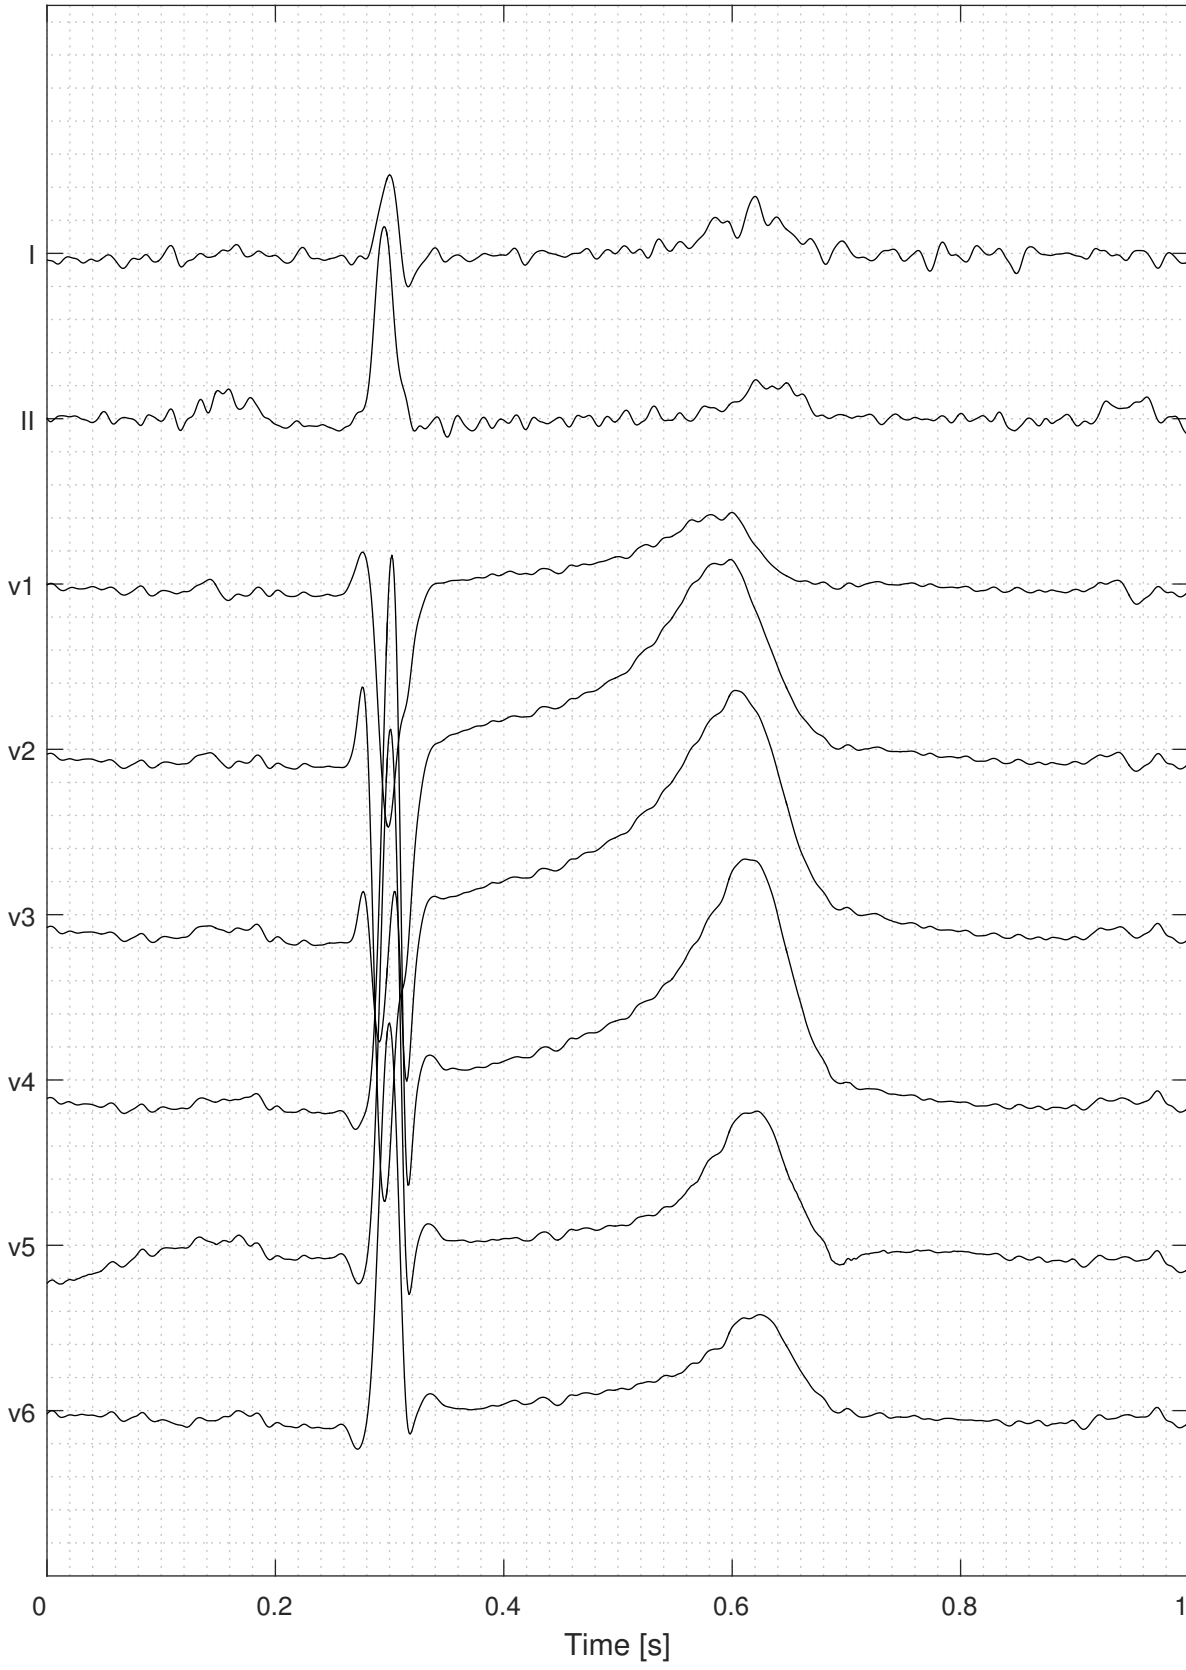

Mid RR, Complex #: 61

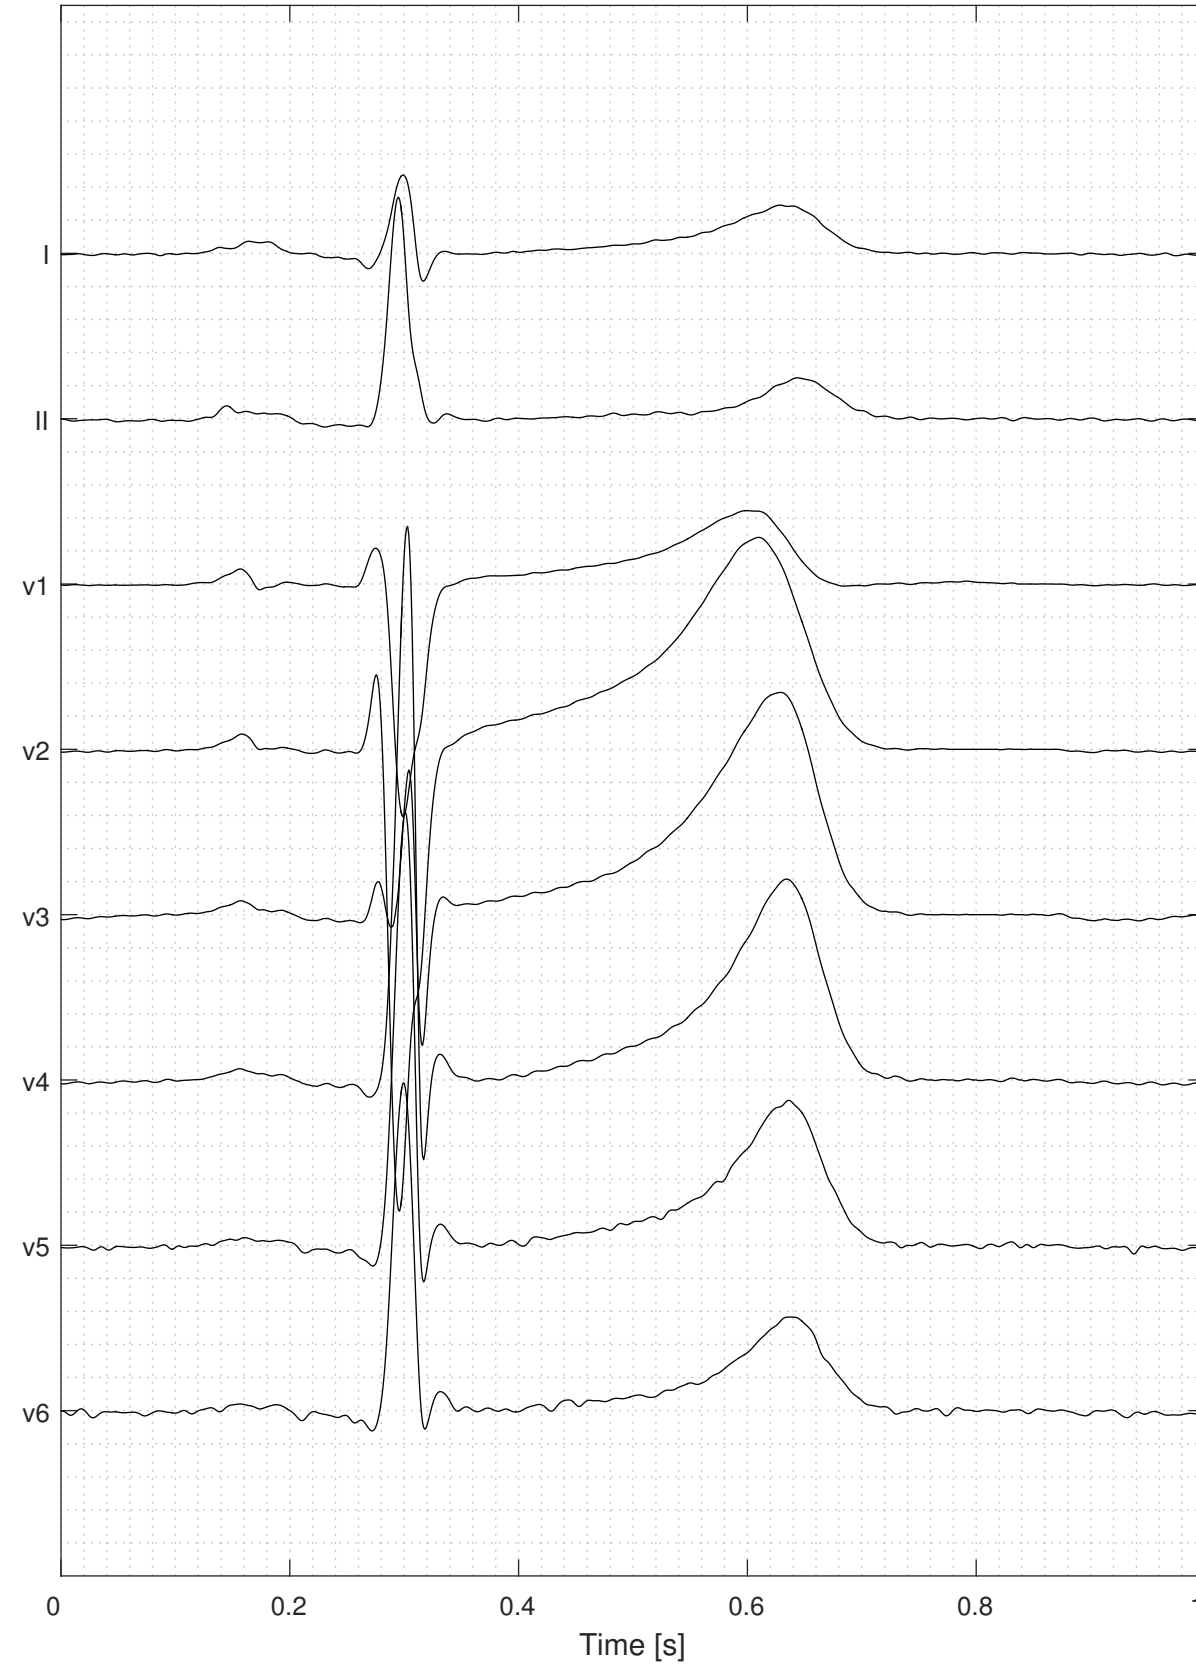

High RR, Complex #: 90

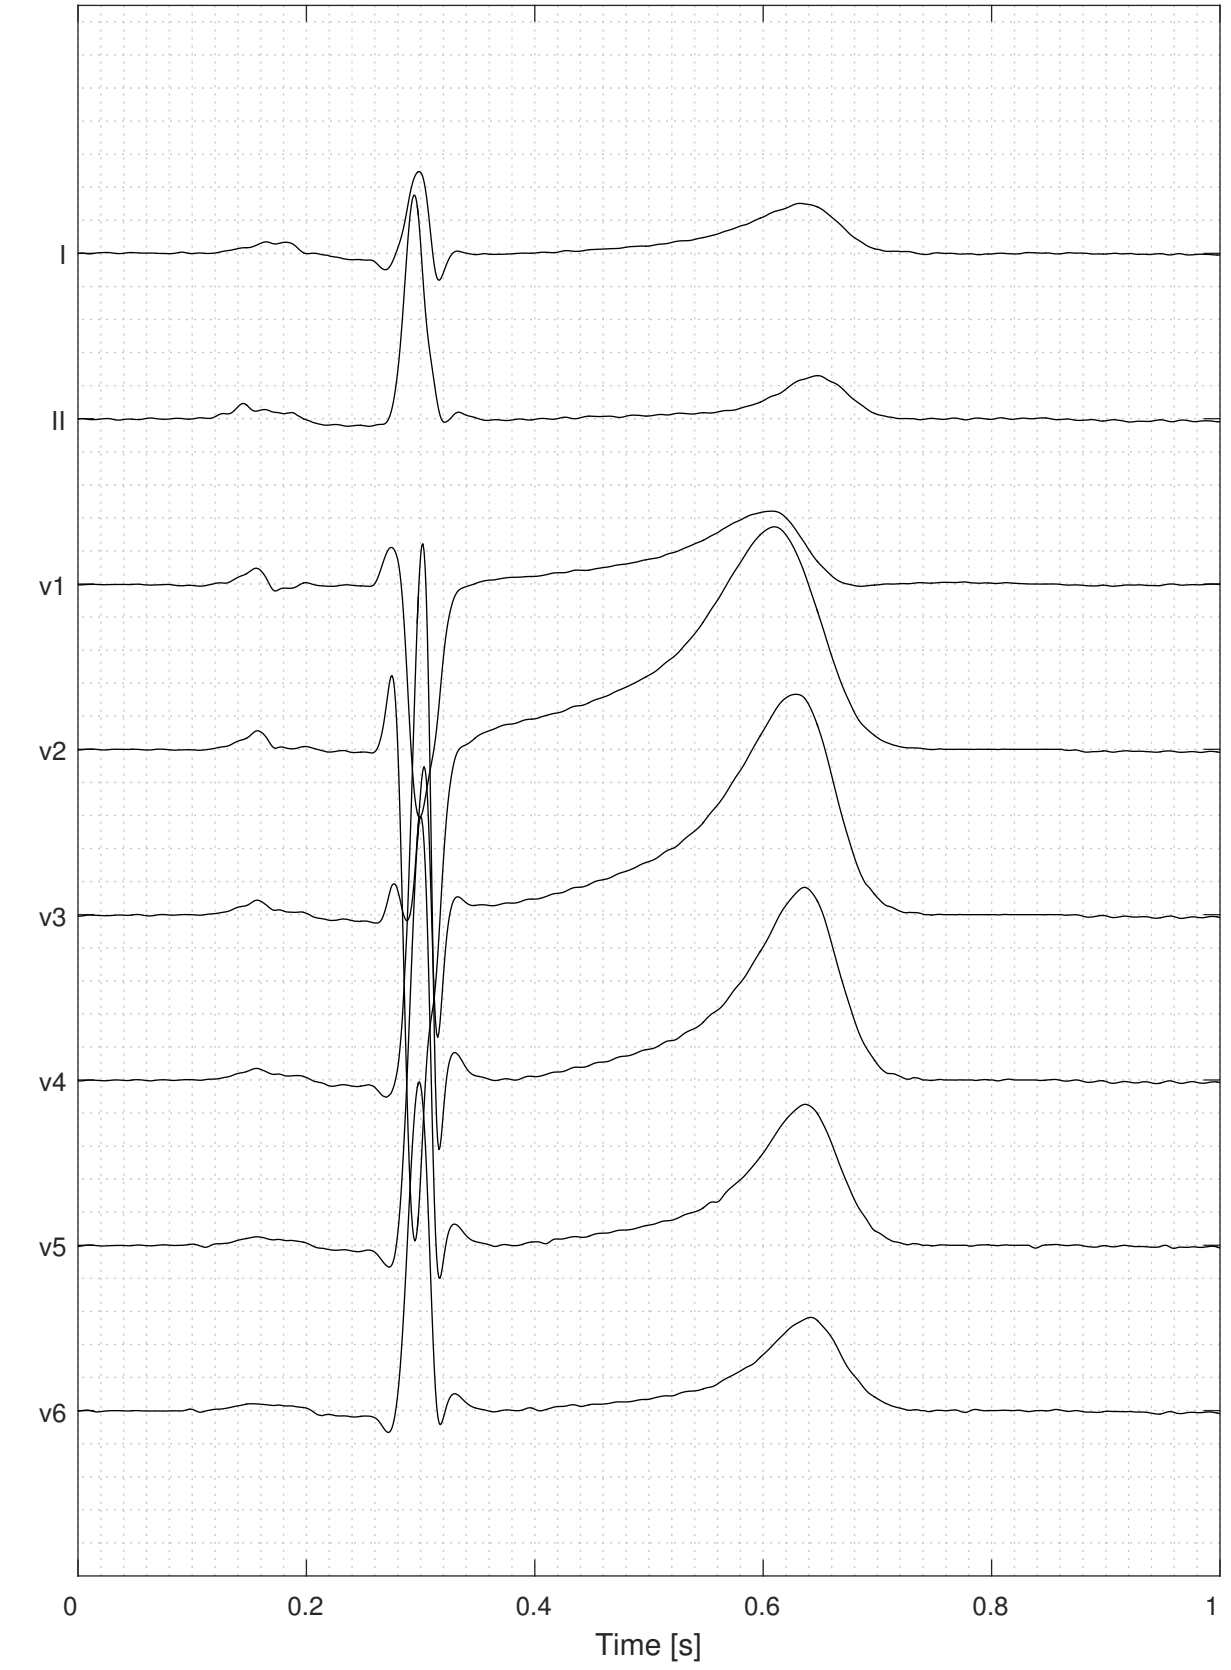

Patient 24

Low RR, Complex #: 109

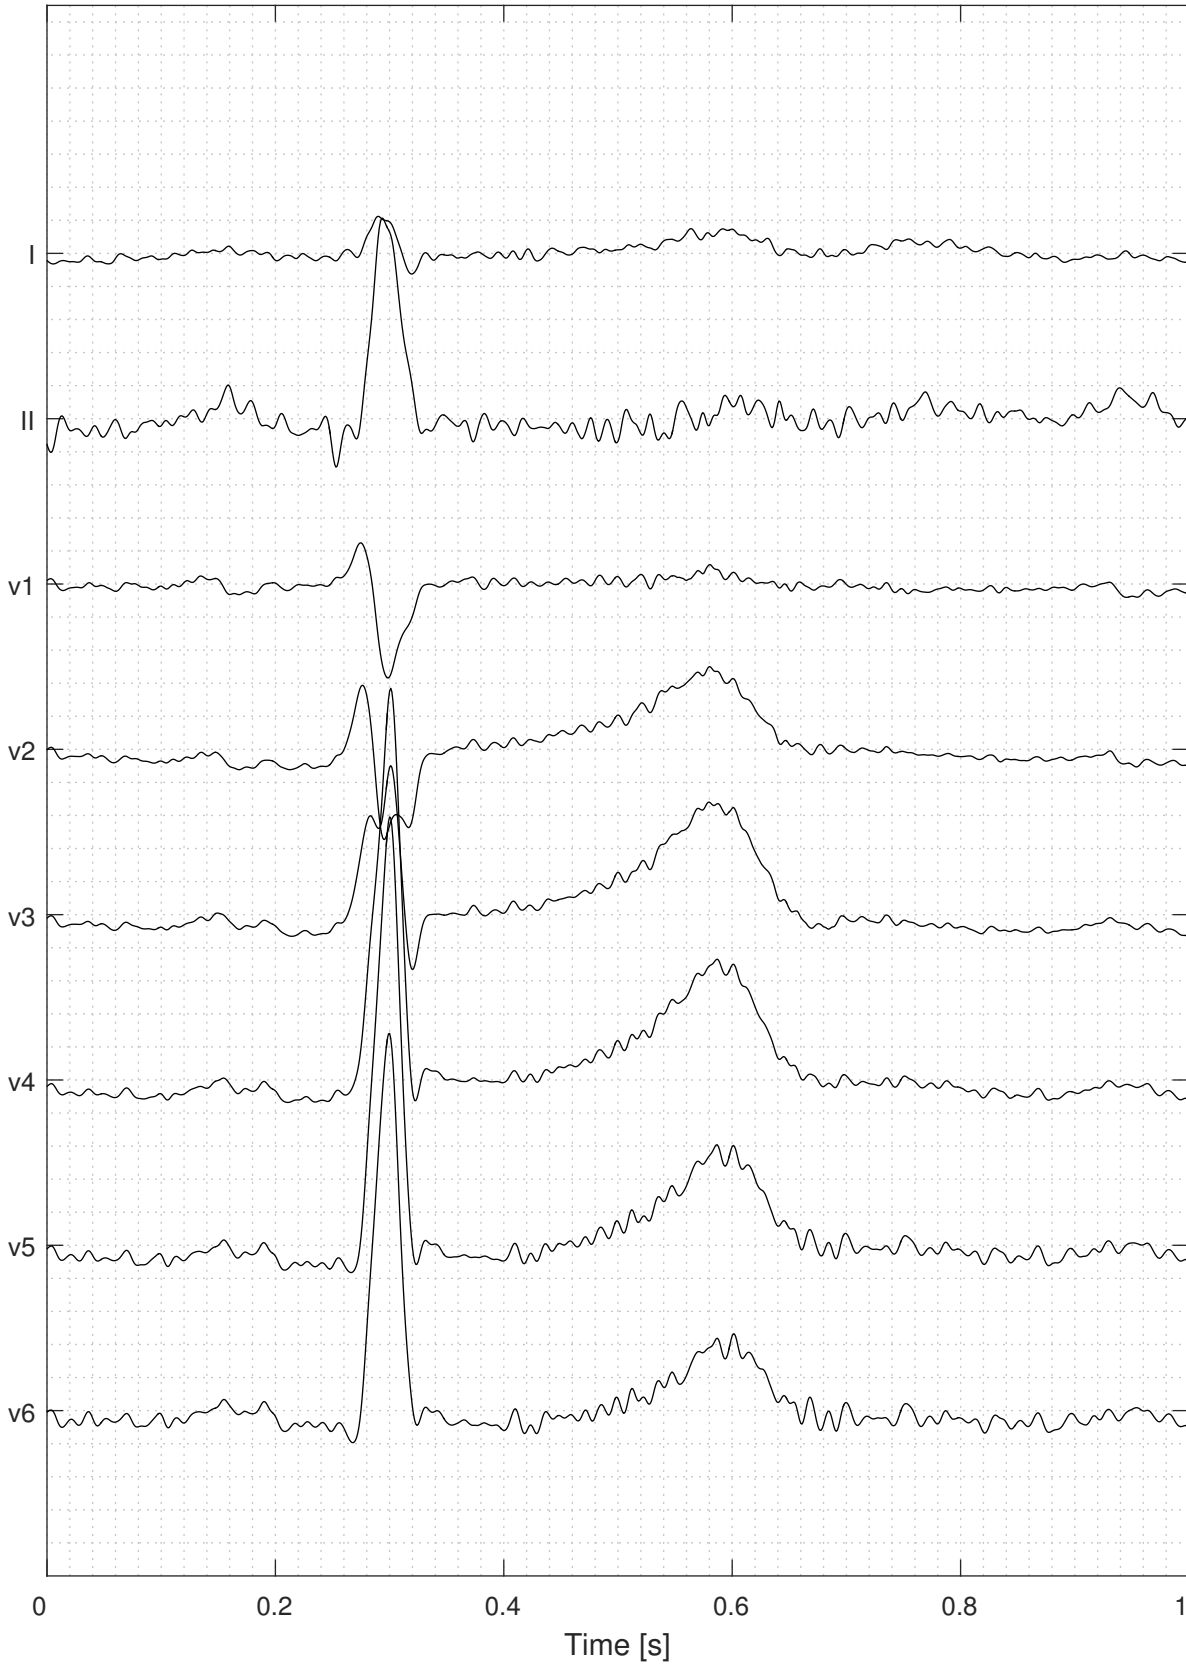

Mid RR, Complex #: 238

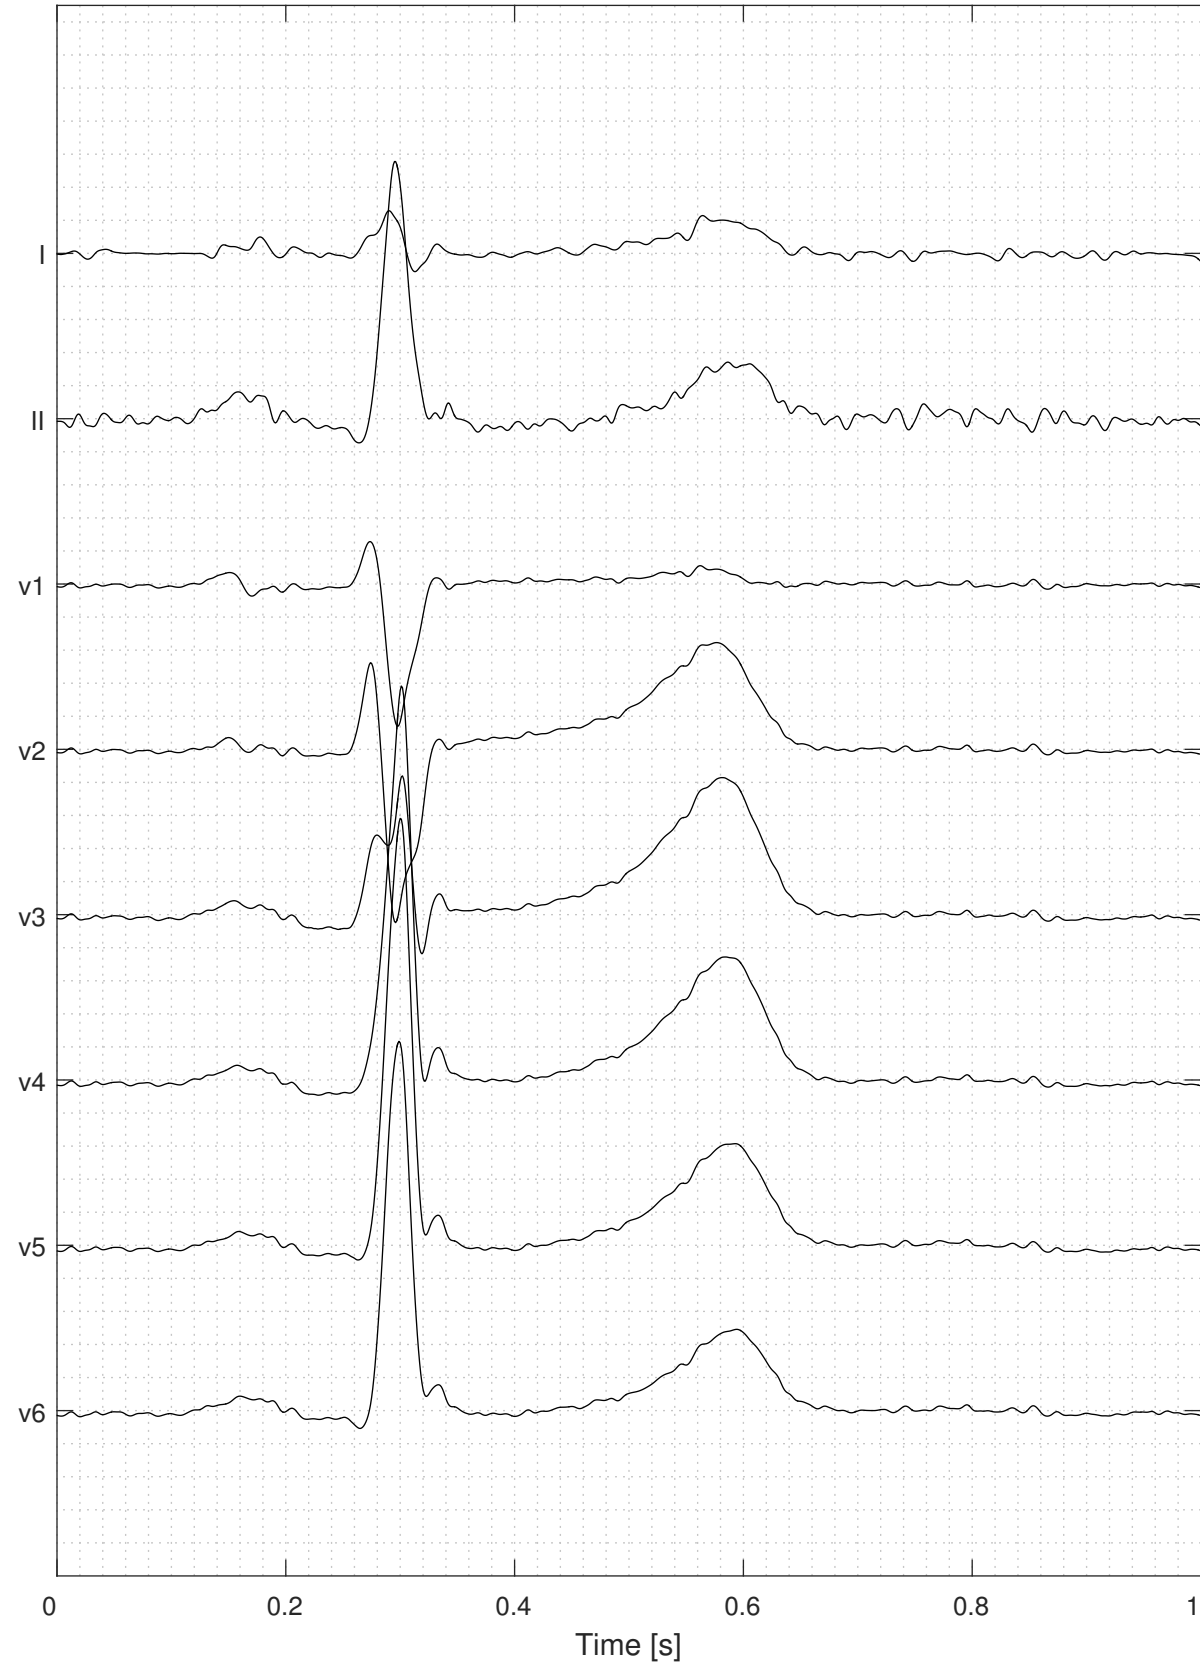

High RR, Complex #: 6

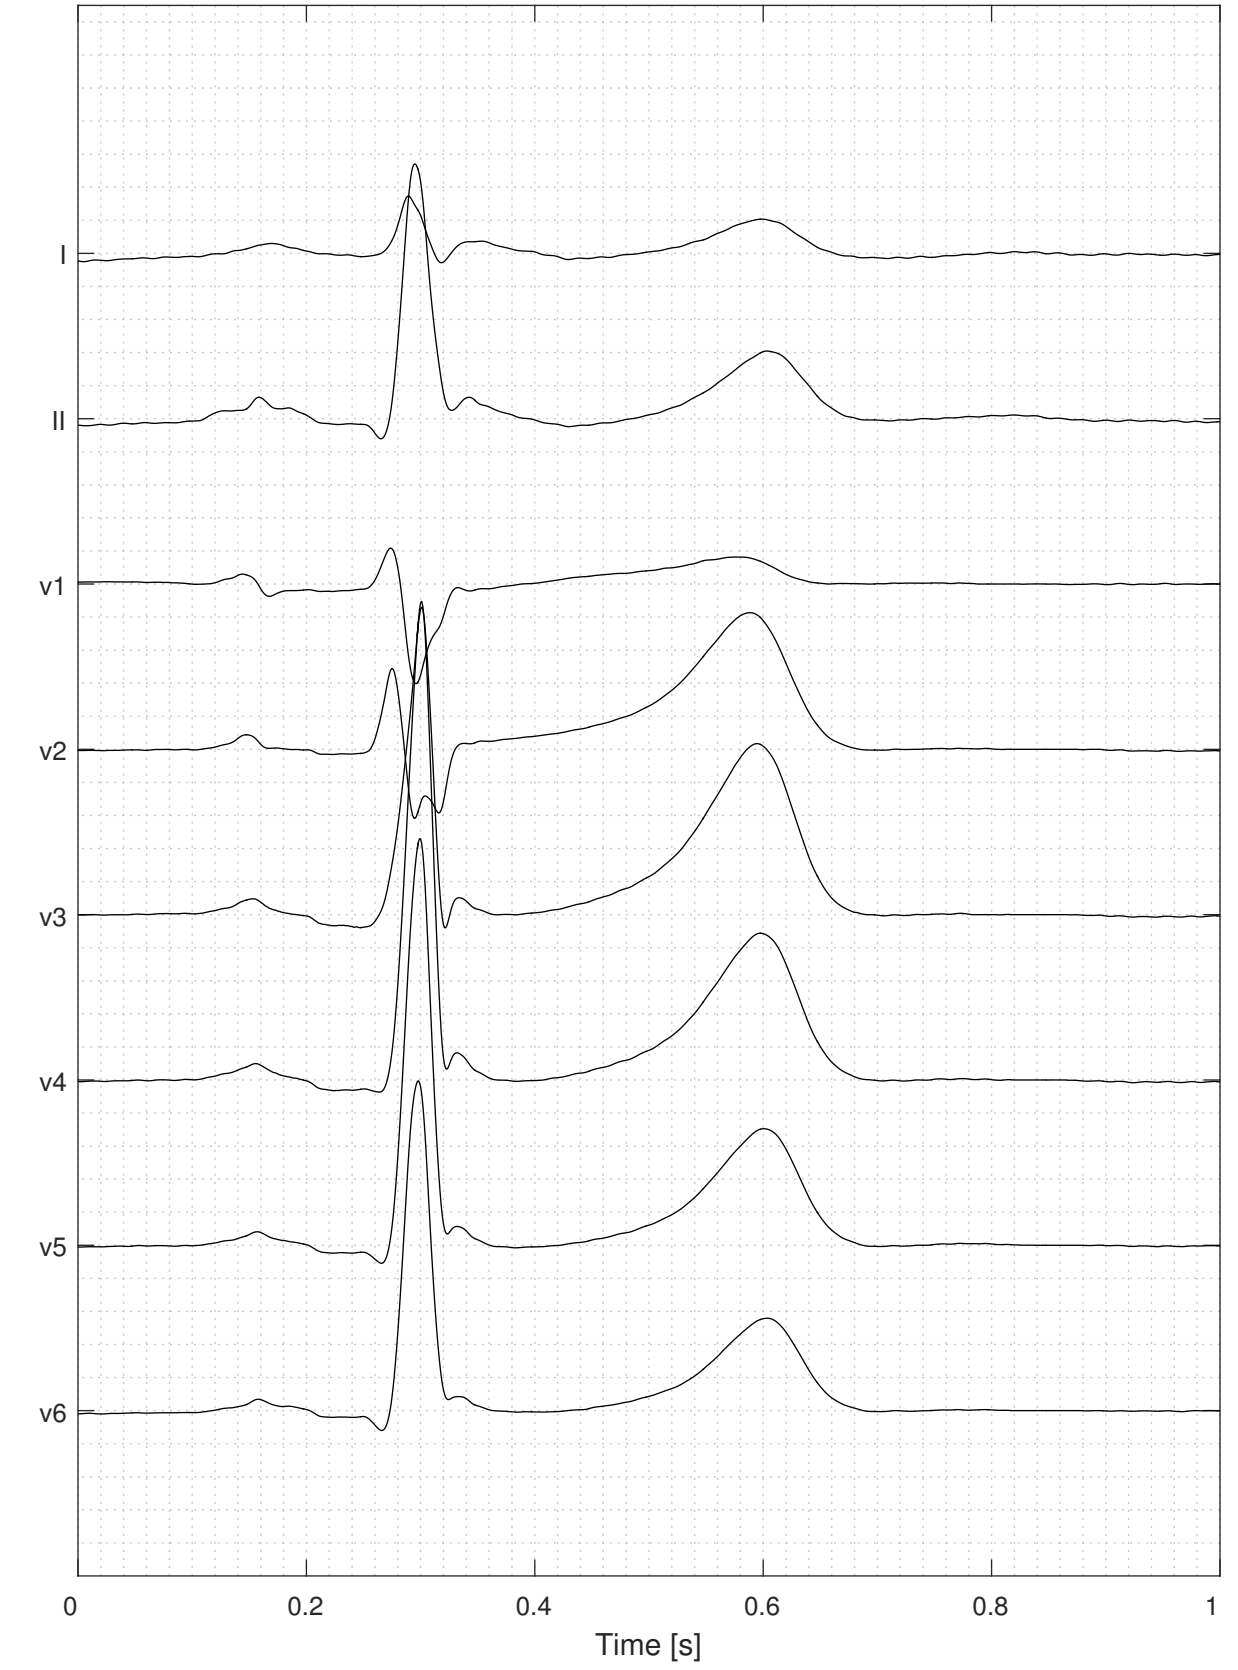



Patient 25

Low RR, Complex #: 370

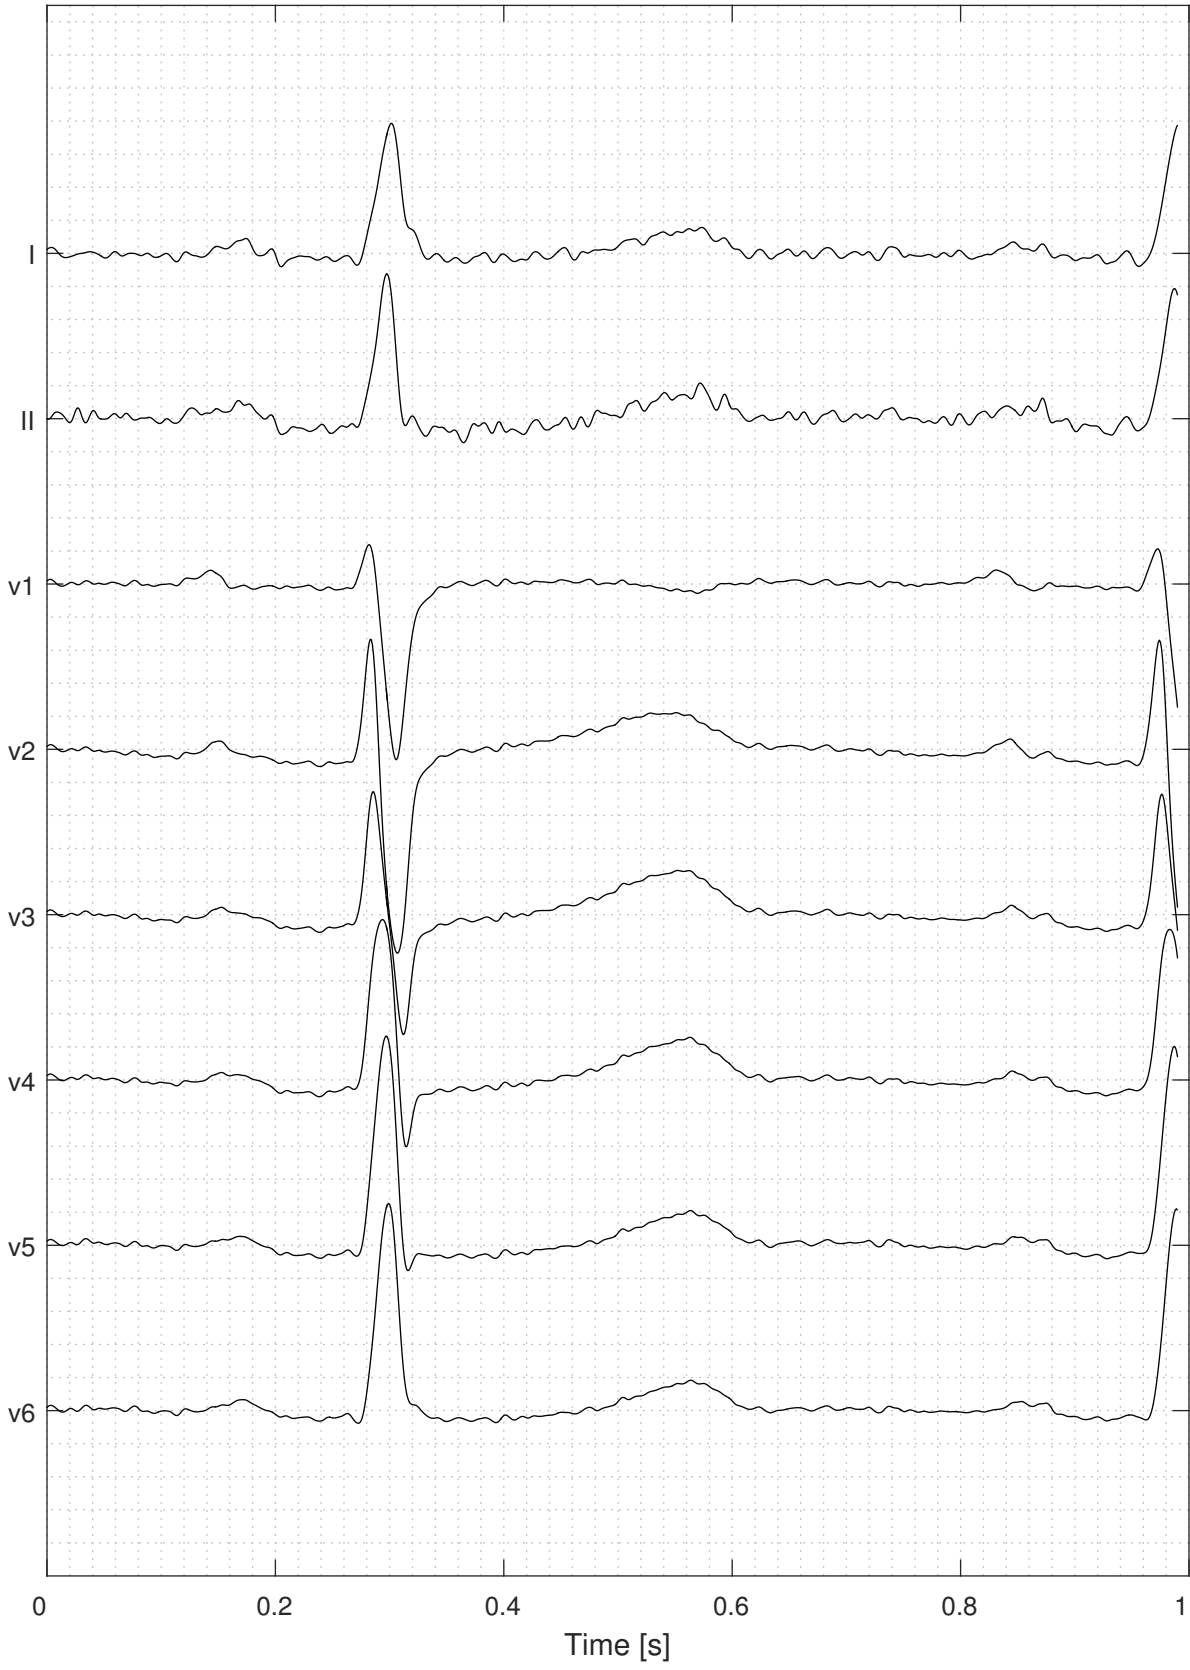

Mid RR, Complex #: 230

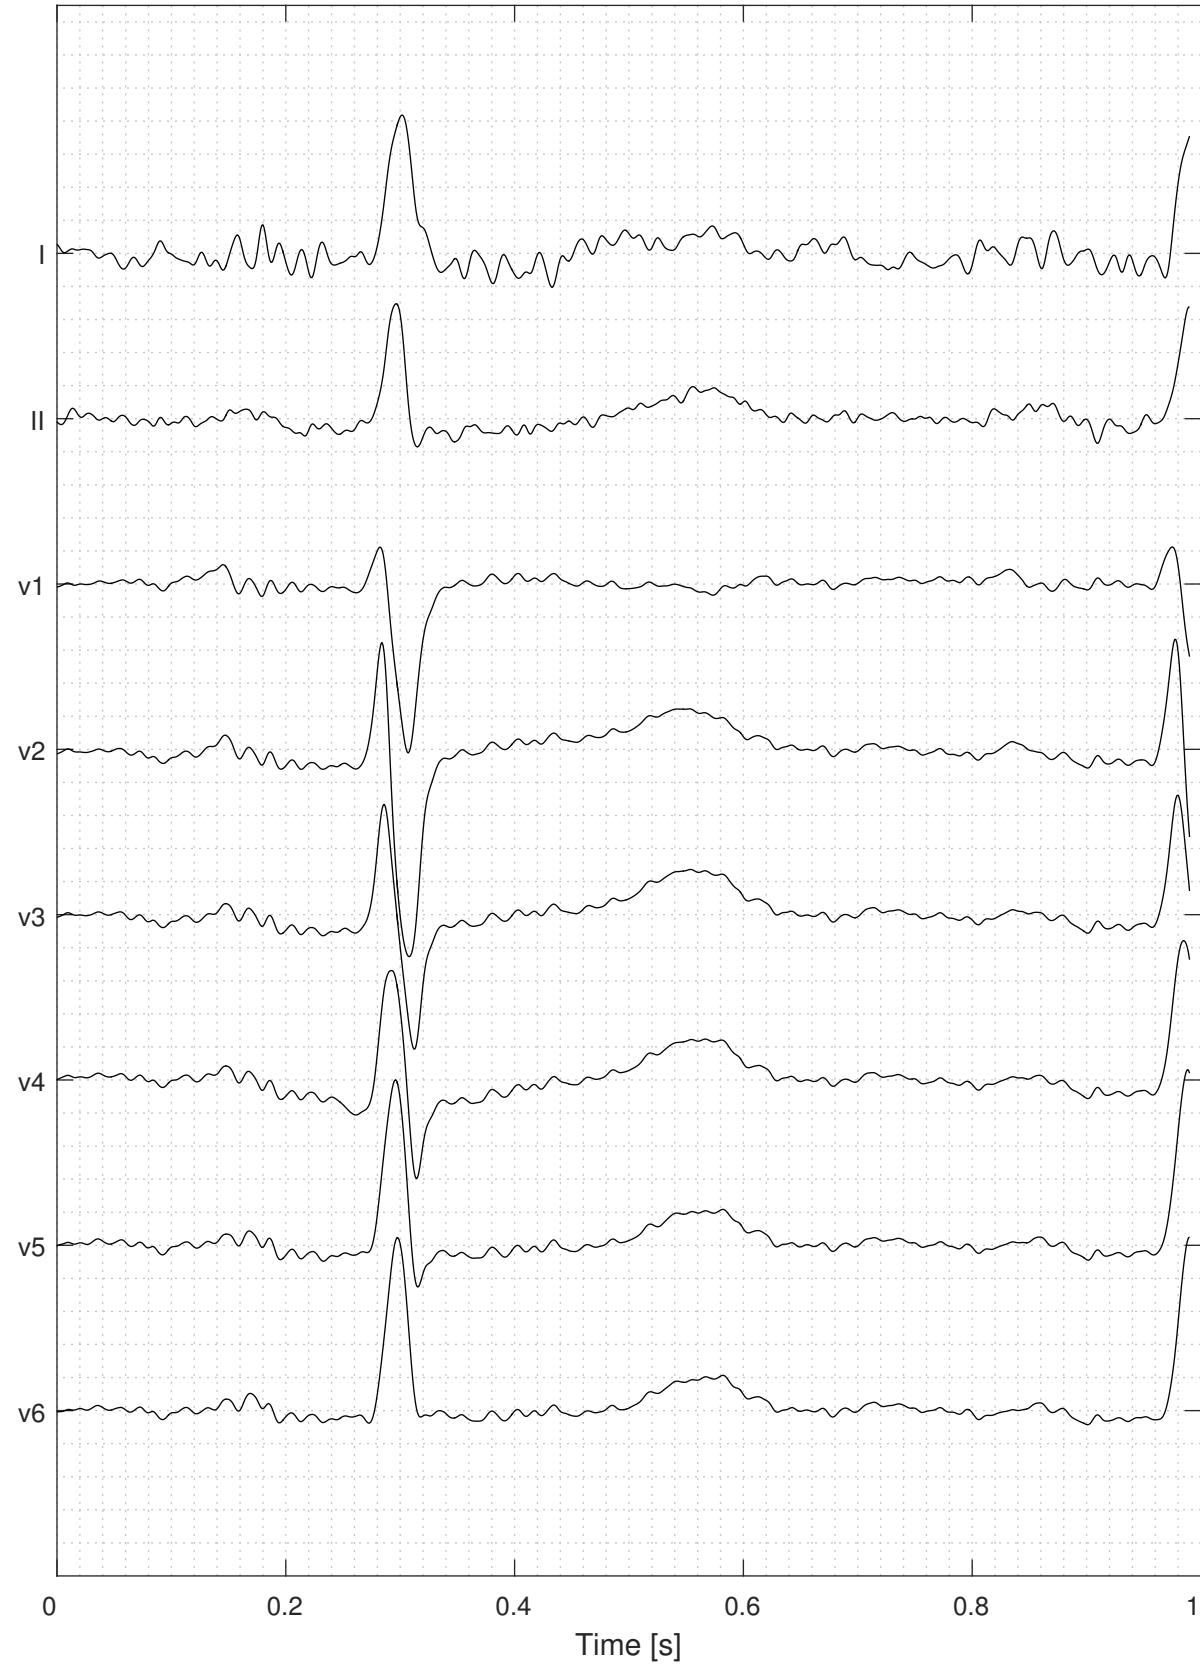

High RR, Complex #: 136

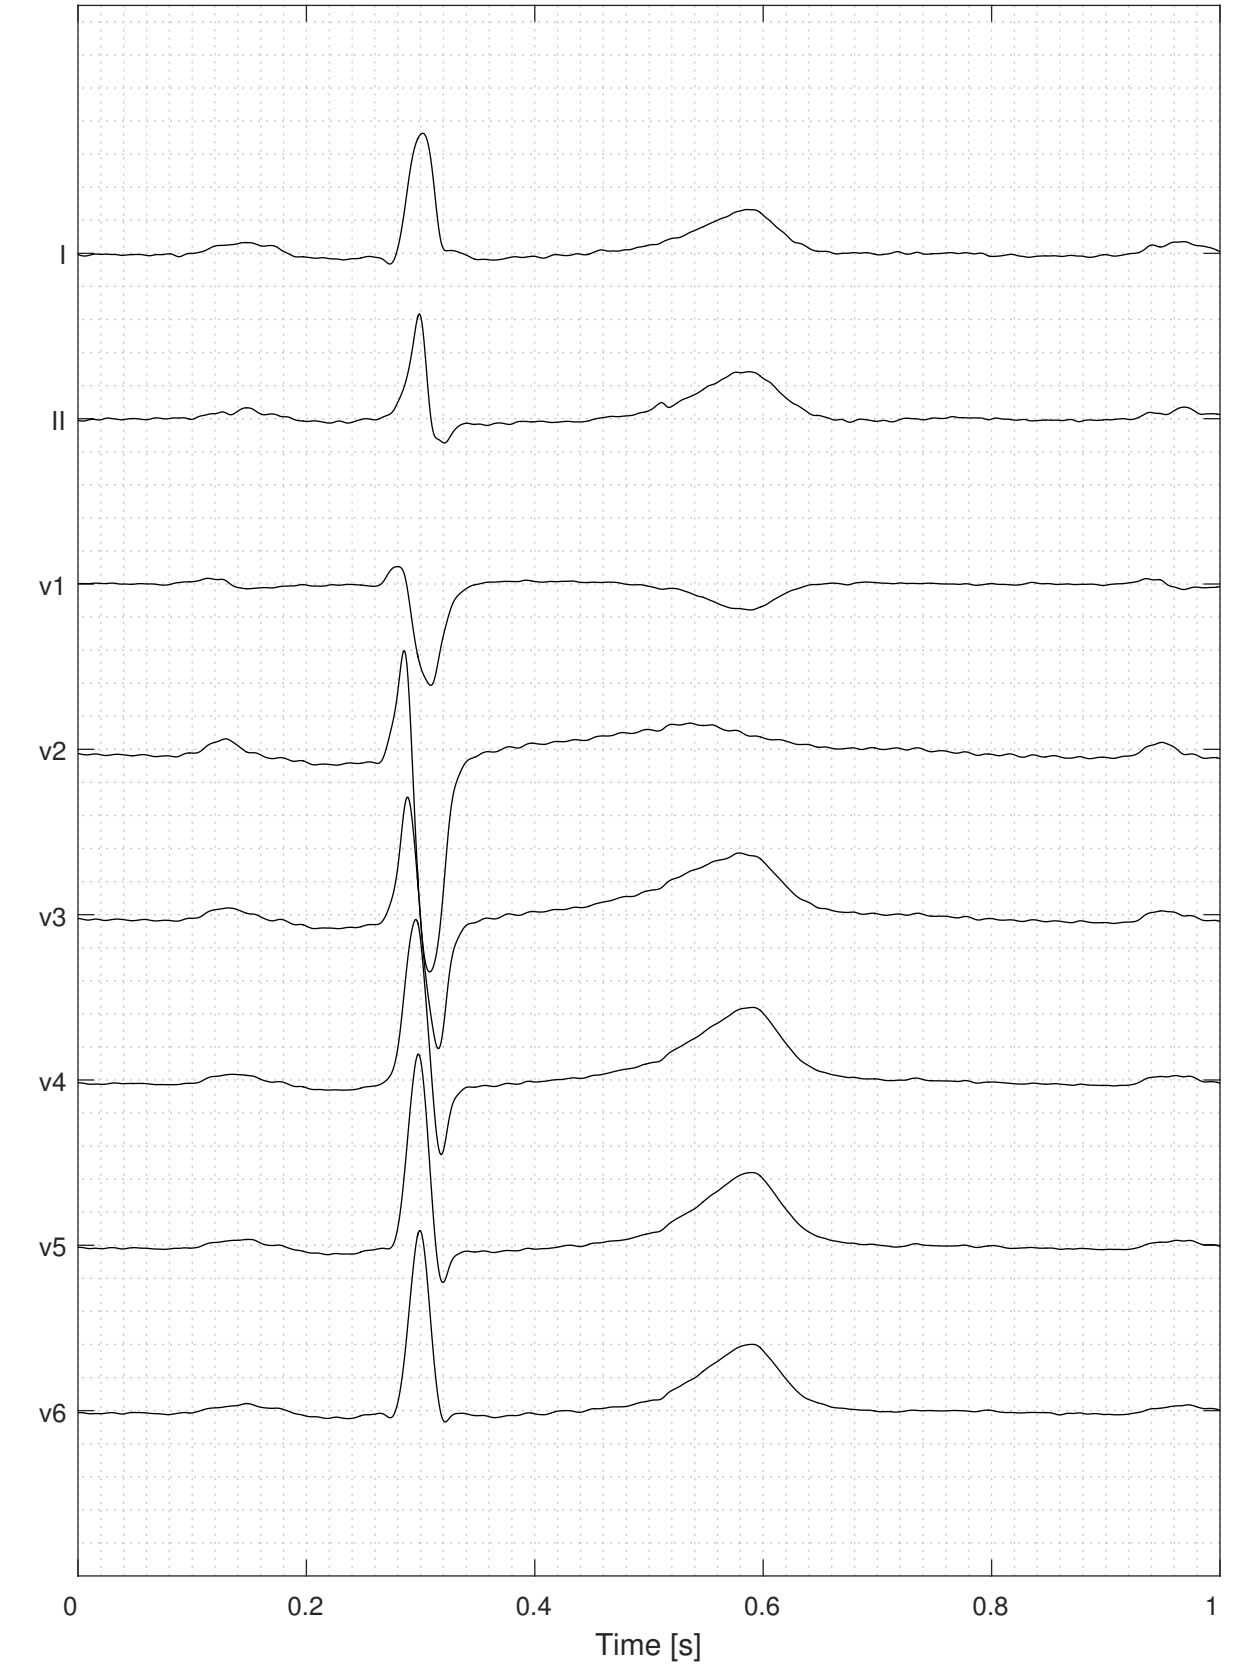

Patient 26

Low RR, Complex #: 348

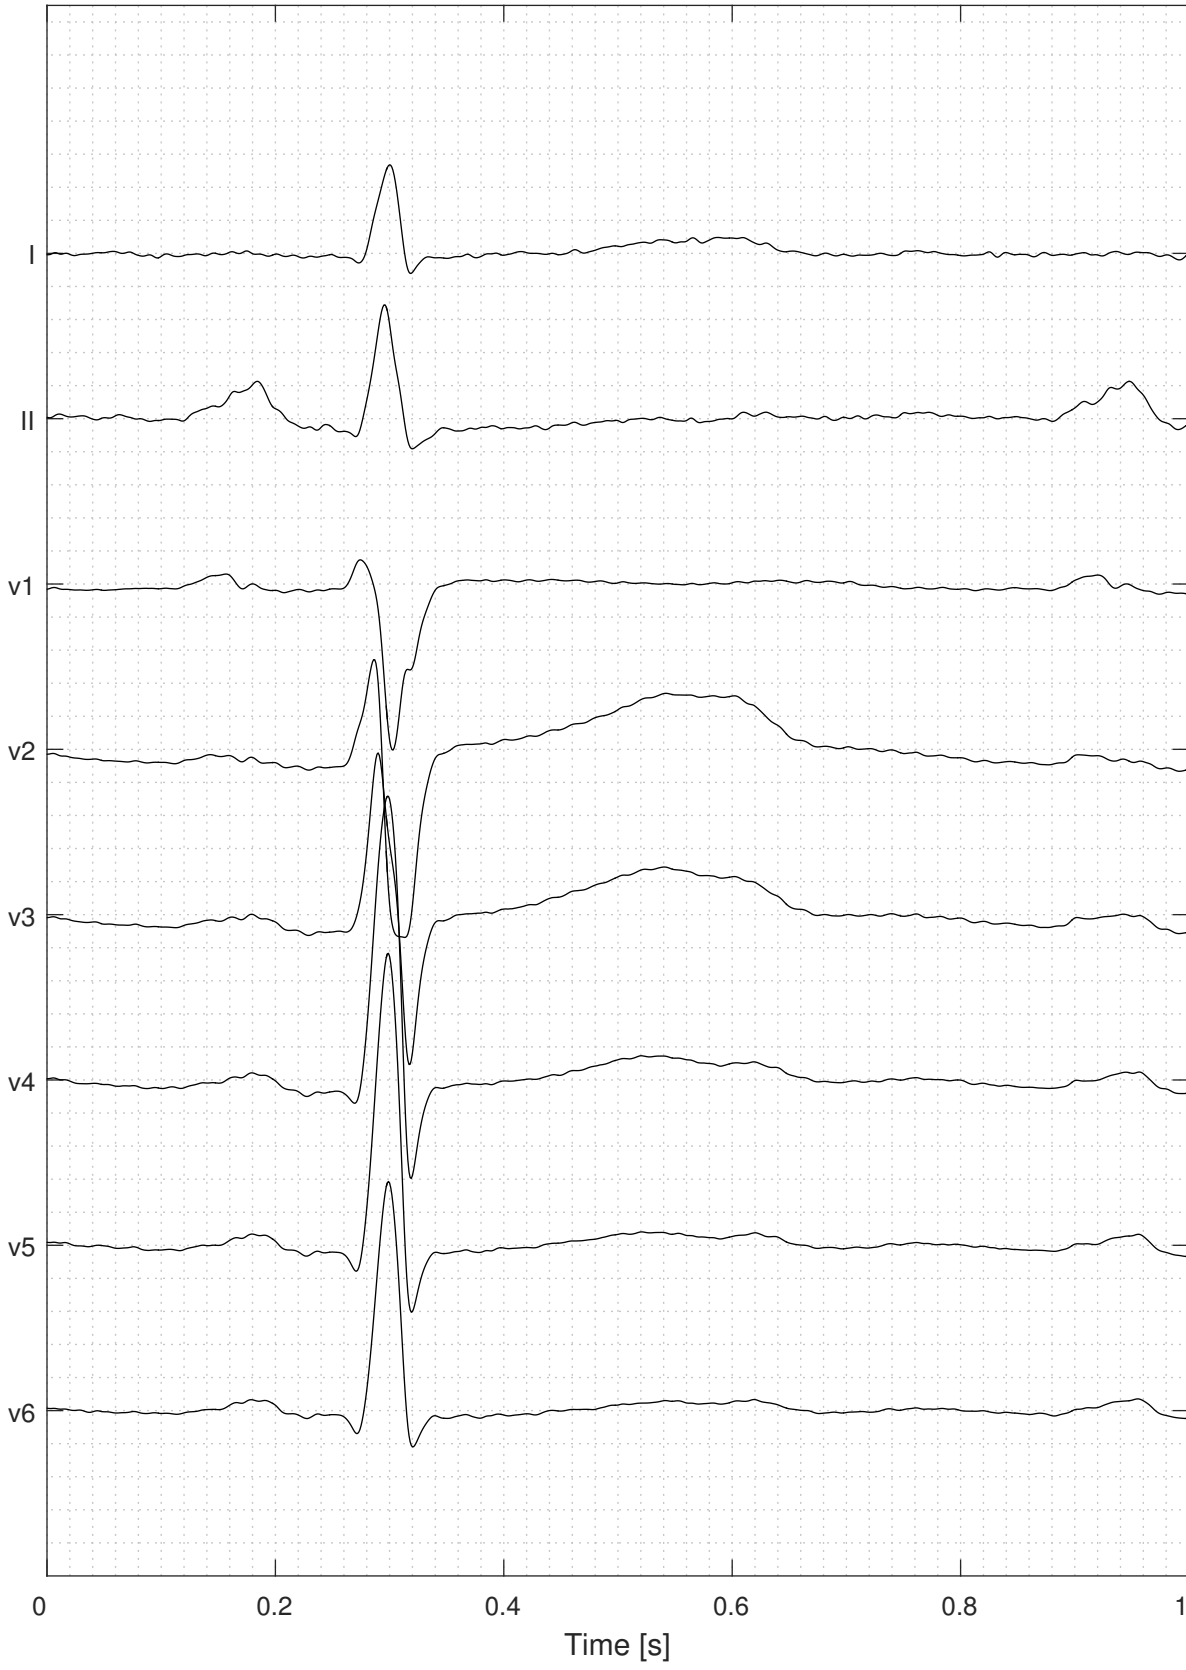

Mid RR, Complex #: 101

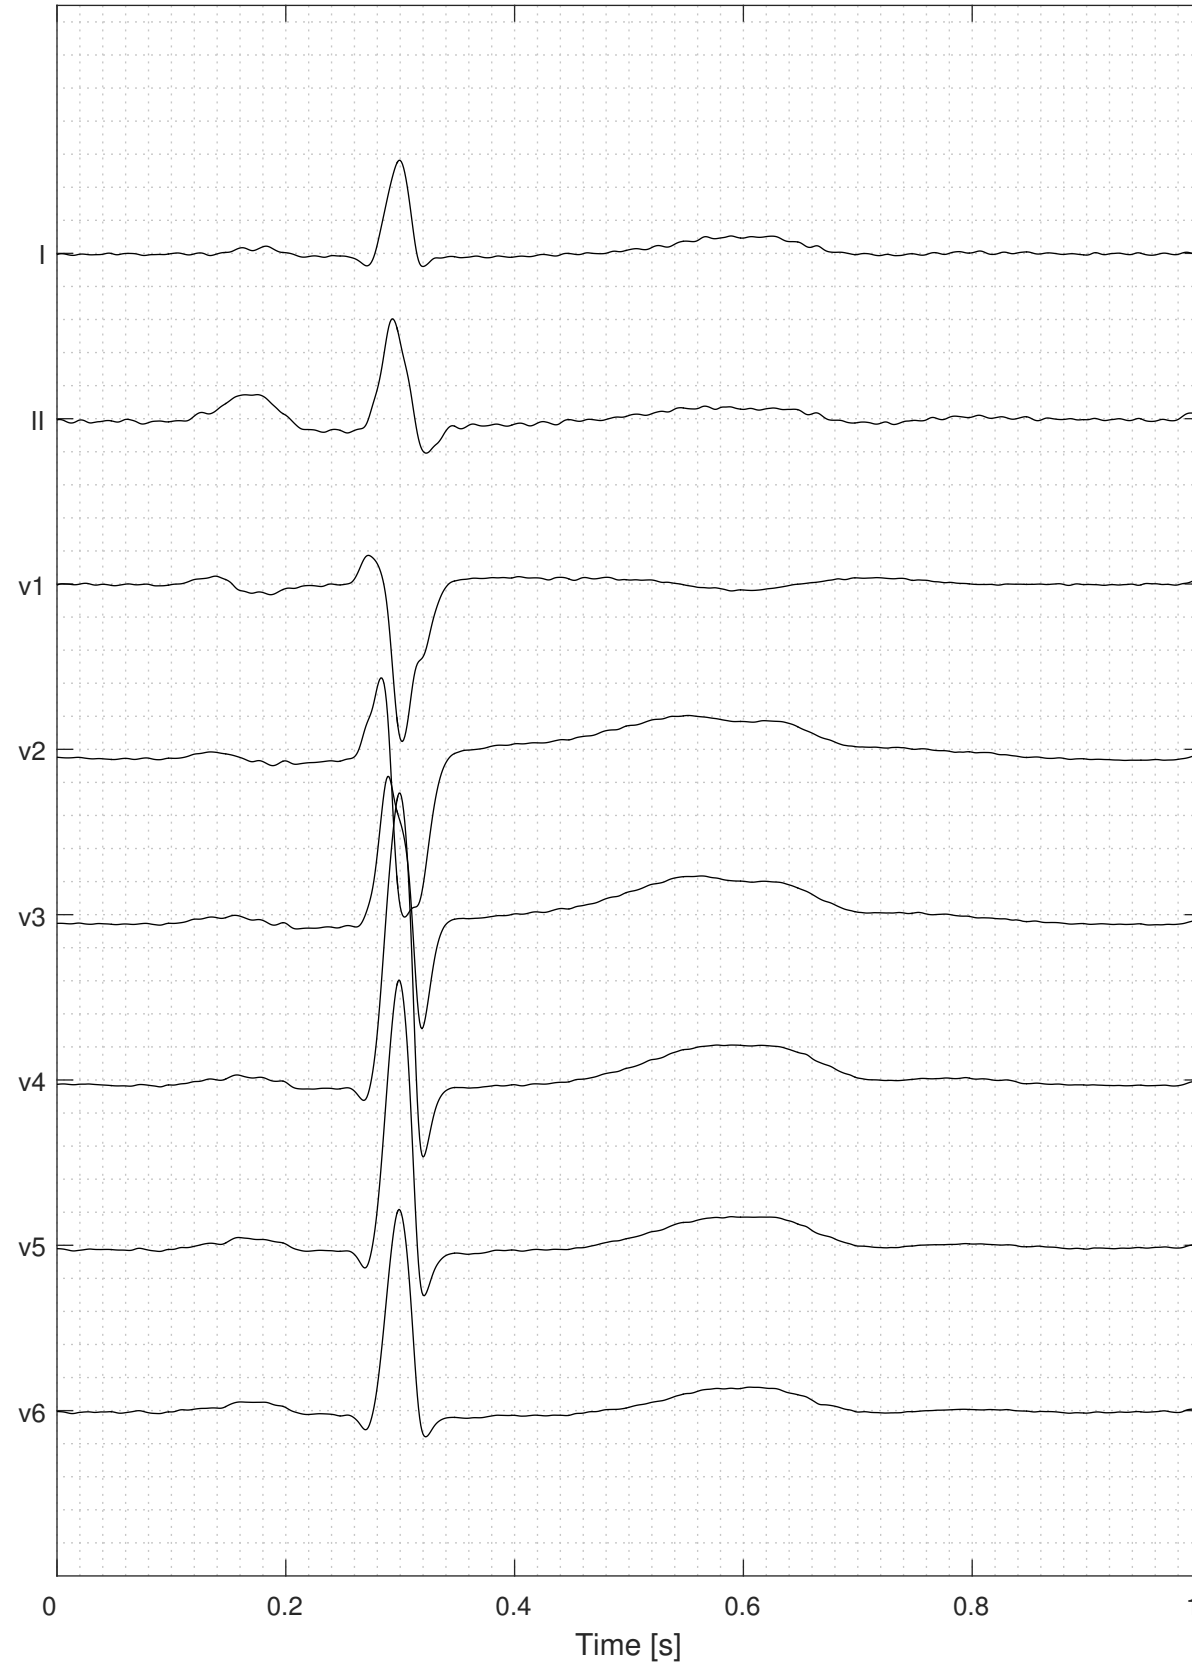

High RR, Complex #: 89

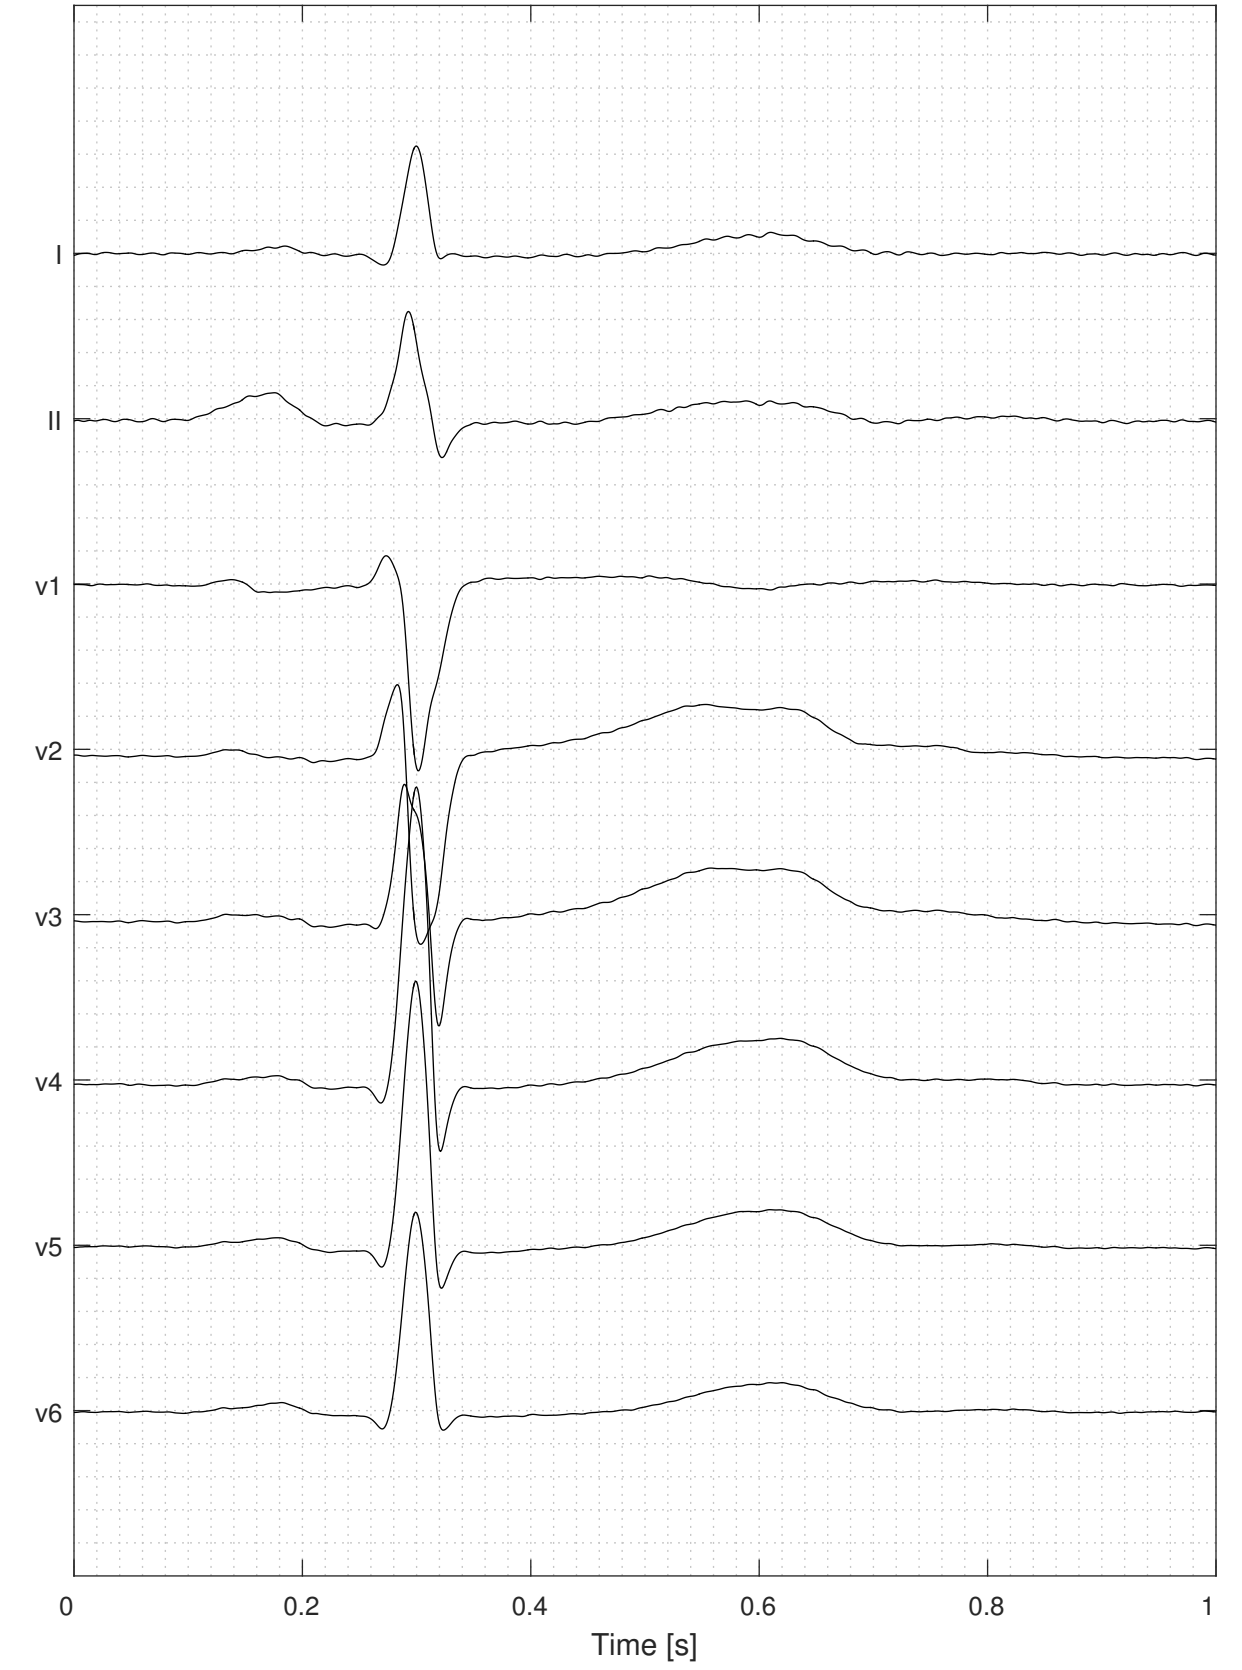

Patient 27

Low RR, Complex #: 138

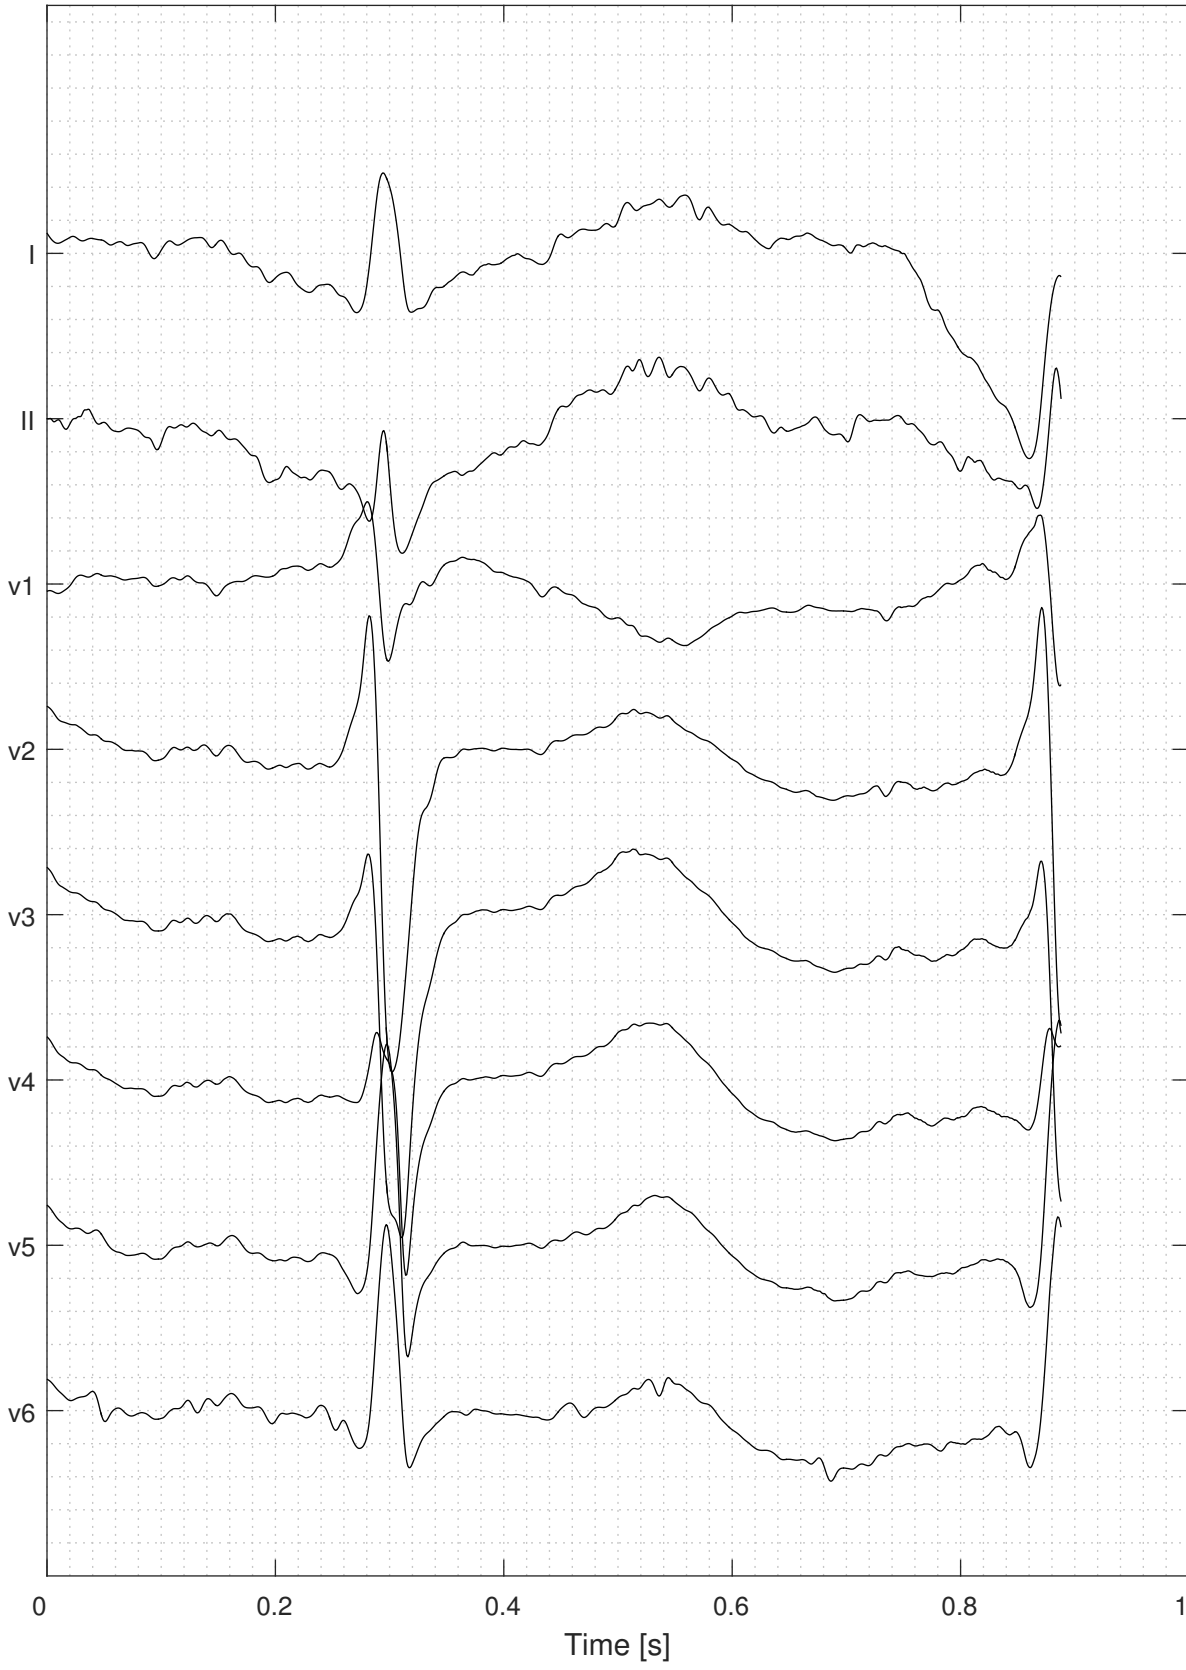

Mid RR, Complex #: 279

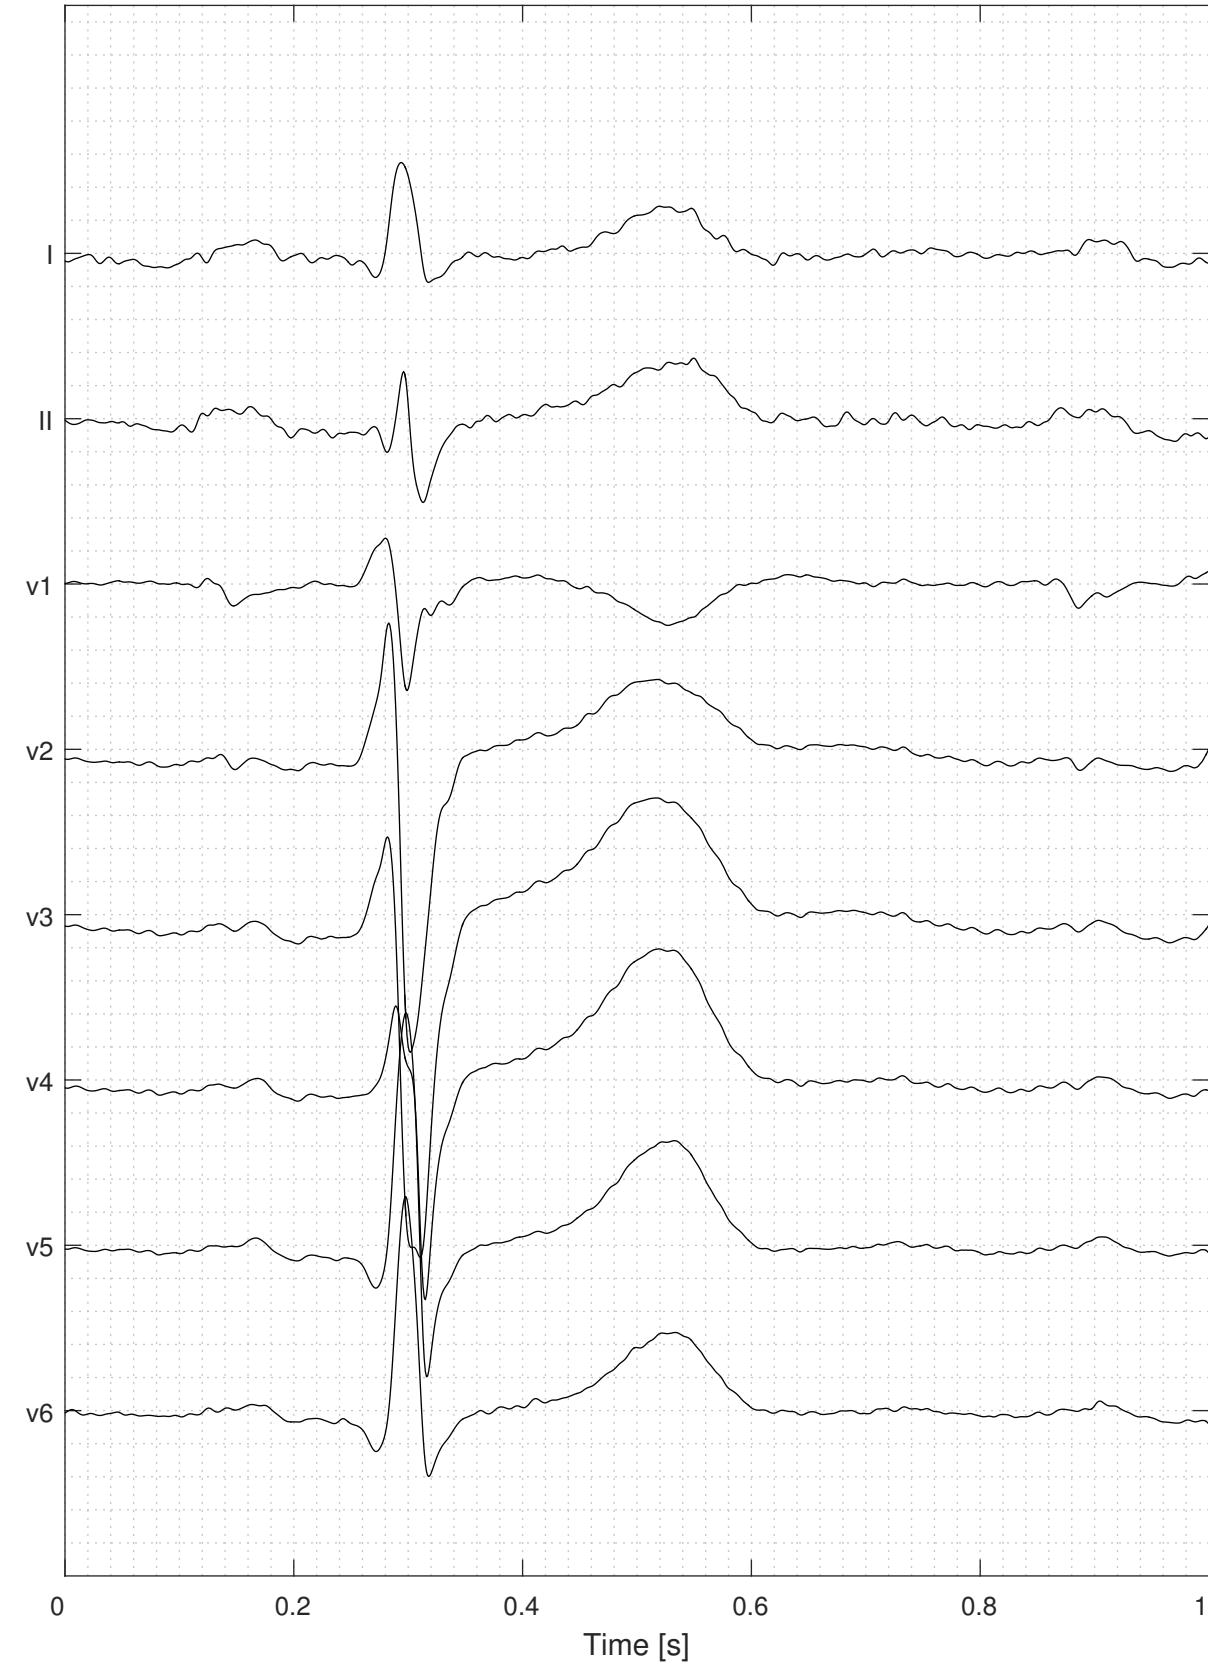

High RR, Complex #: 94

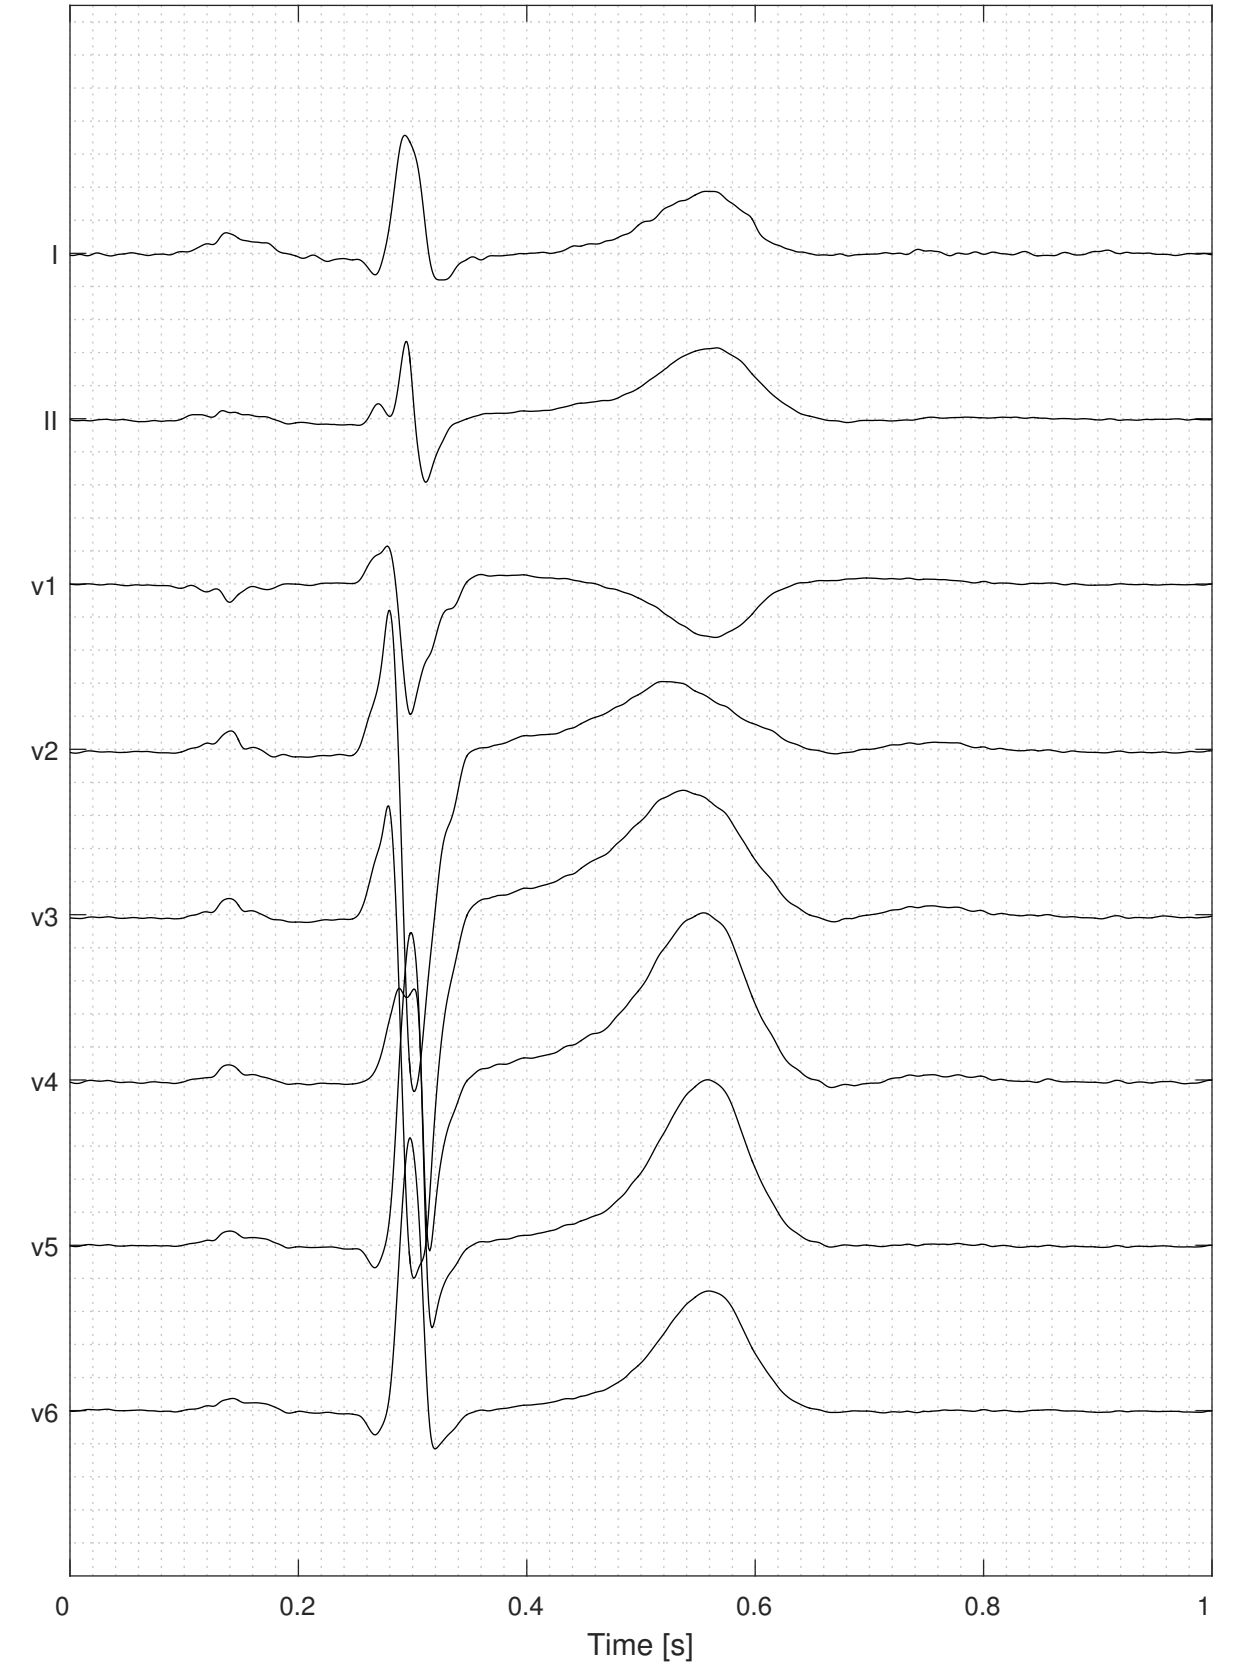

Patient 28

Low RR, Complex #: 134

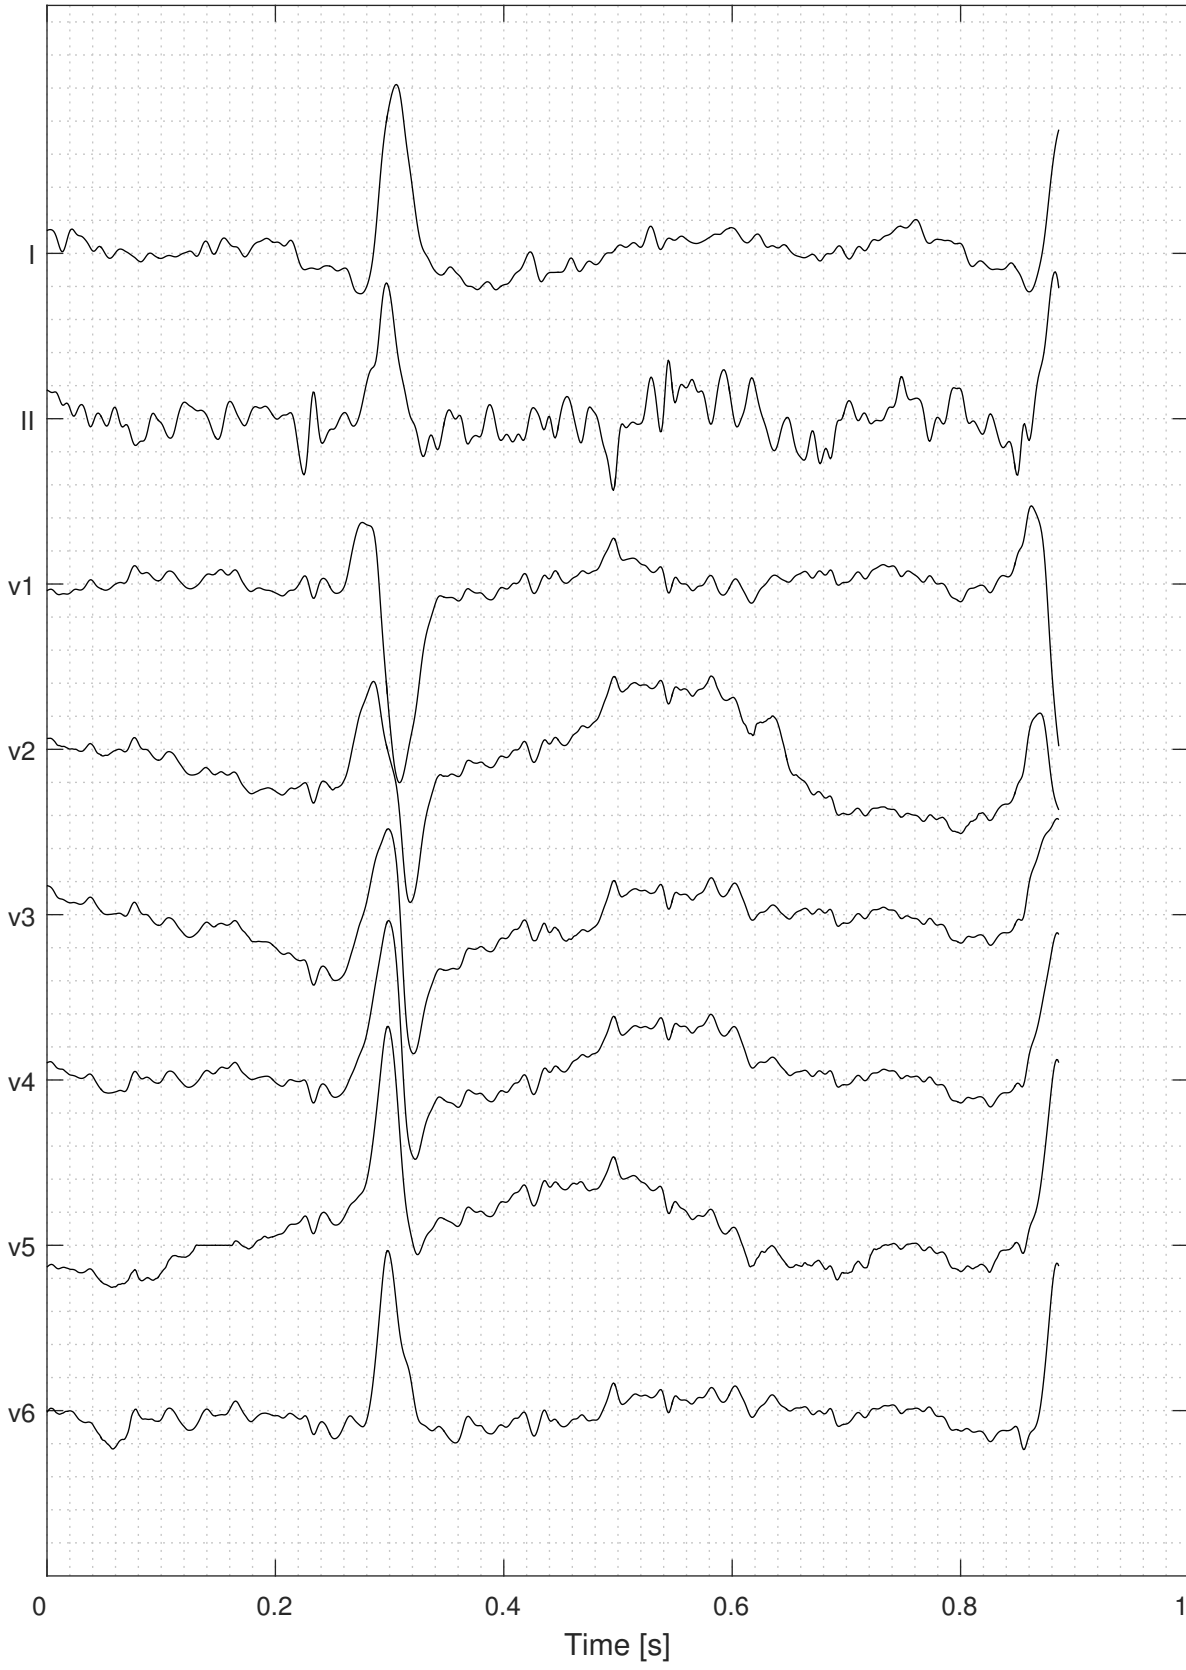

Mid RR, Complex #: 81

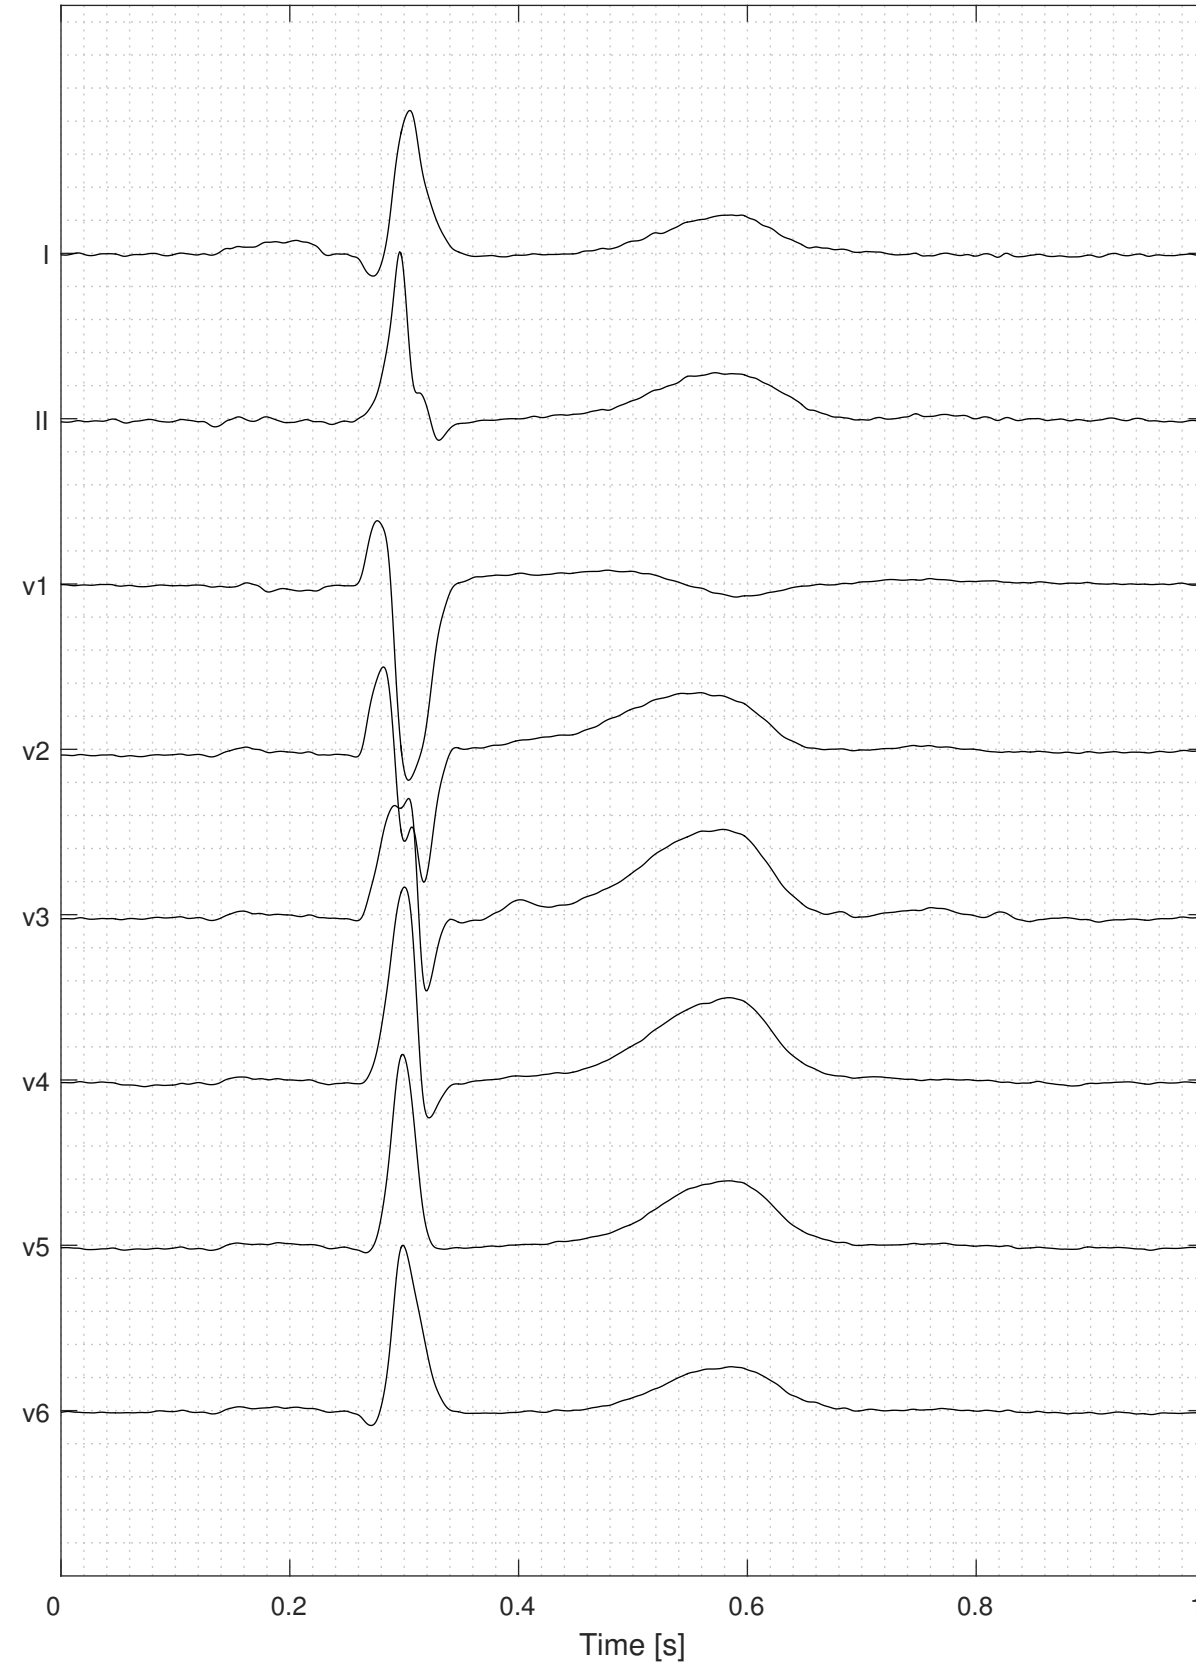

High RR, Complex #: 53

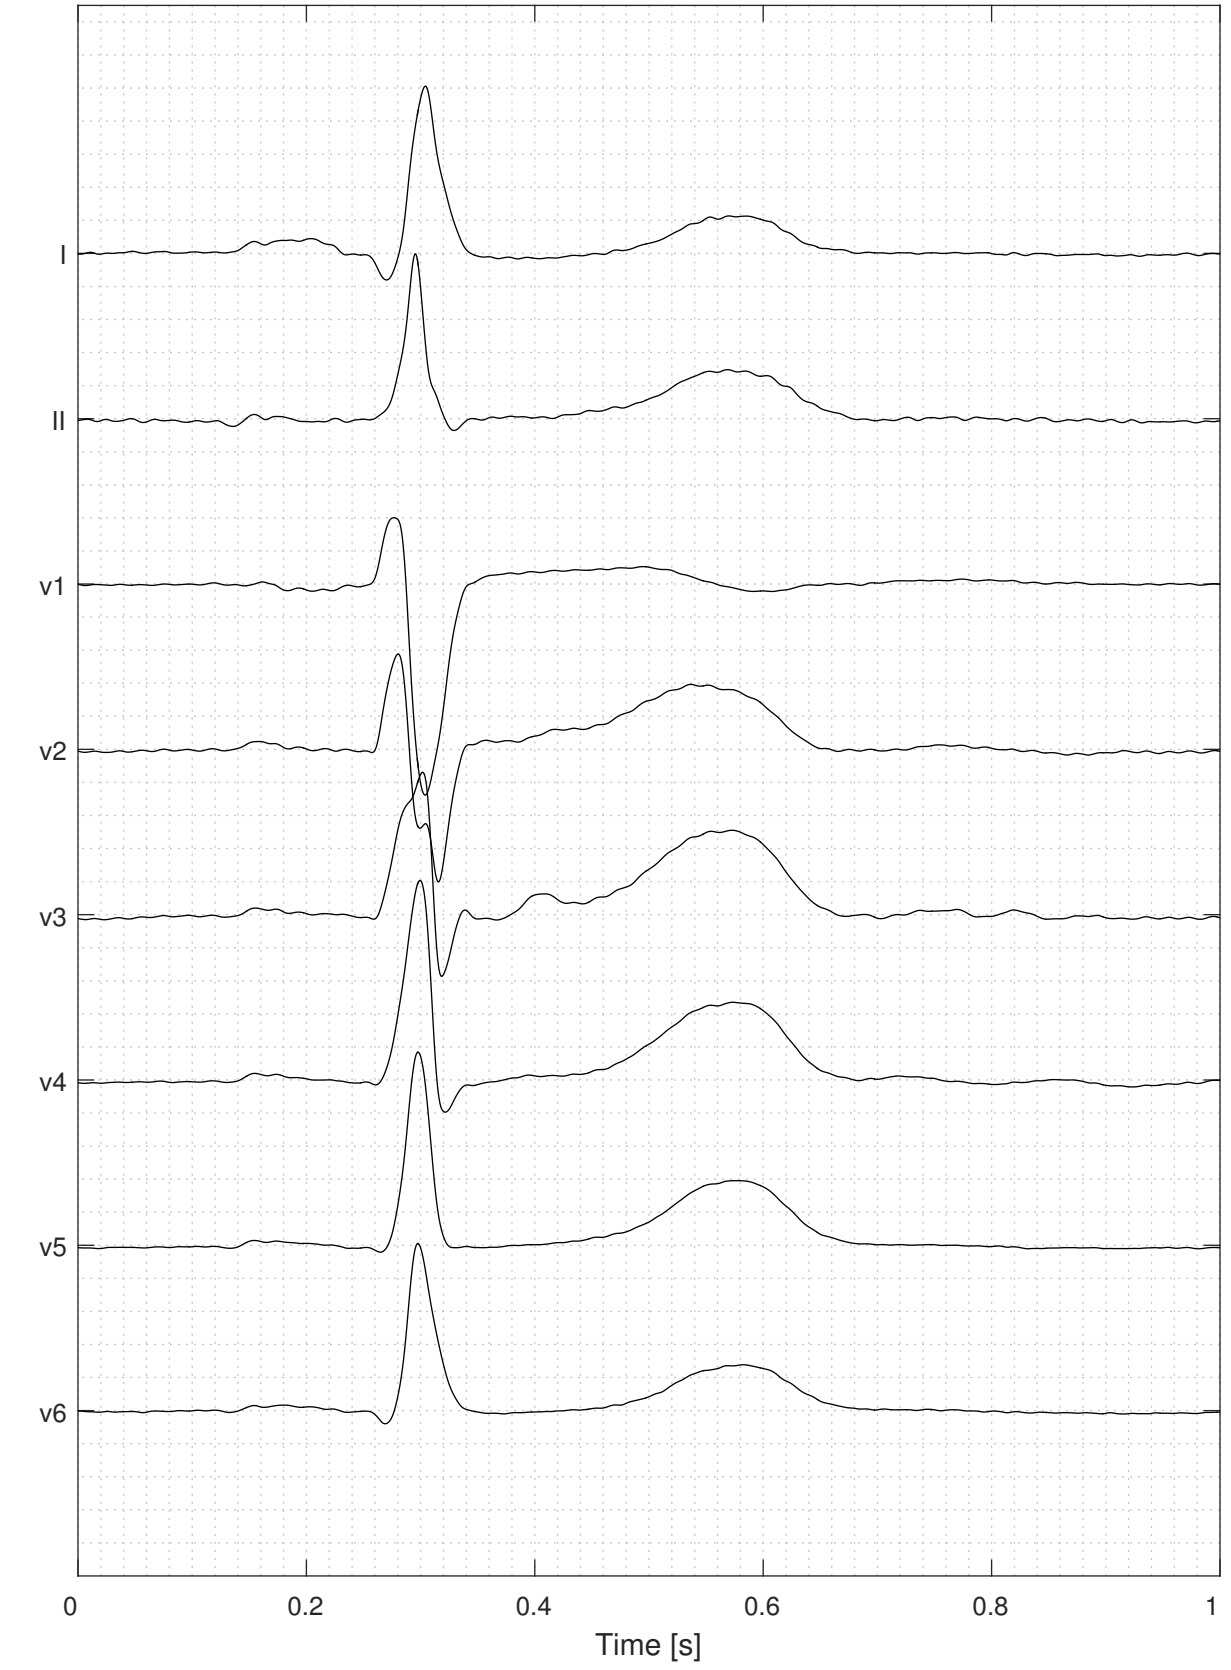

Patient 29

Low RR, Complex #: 183

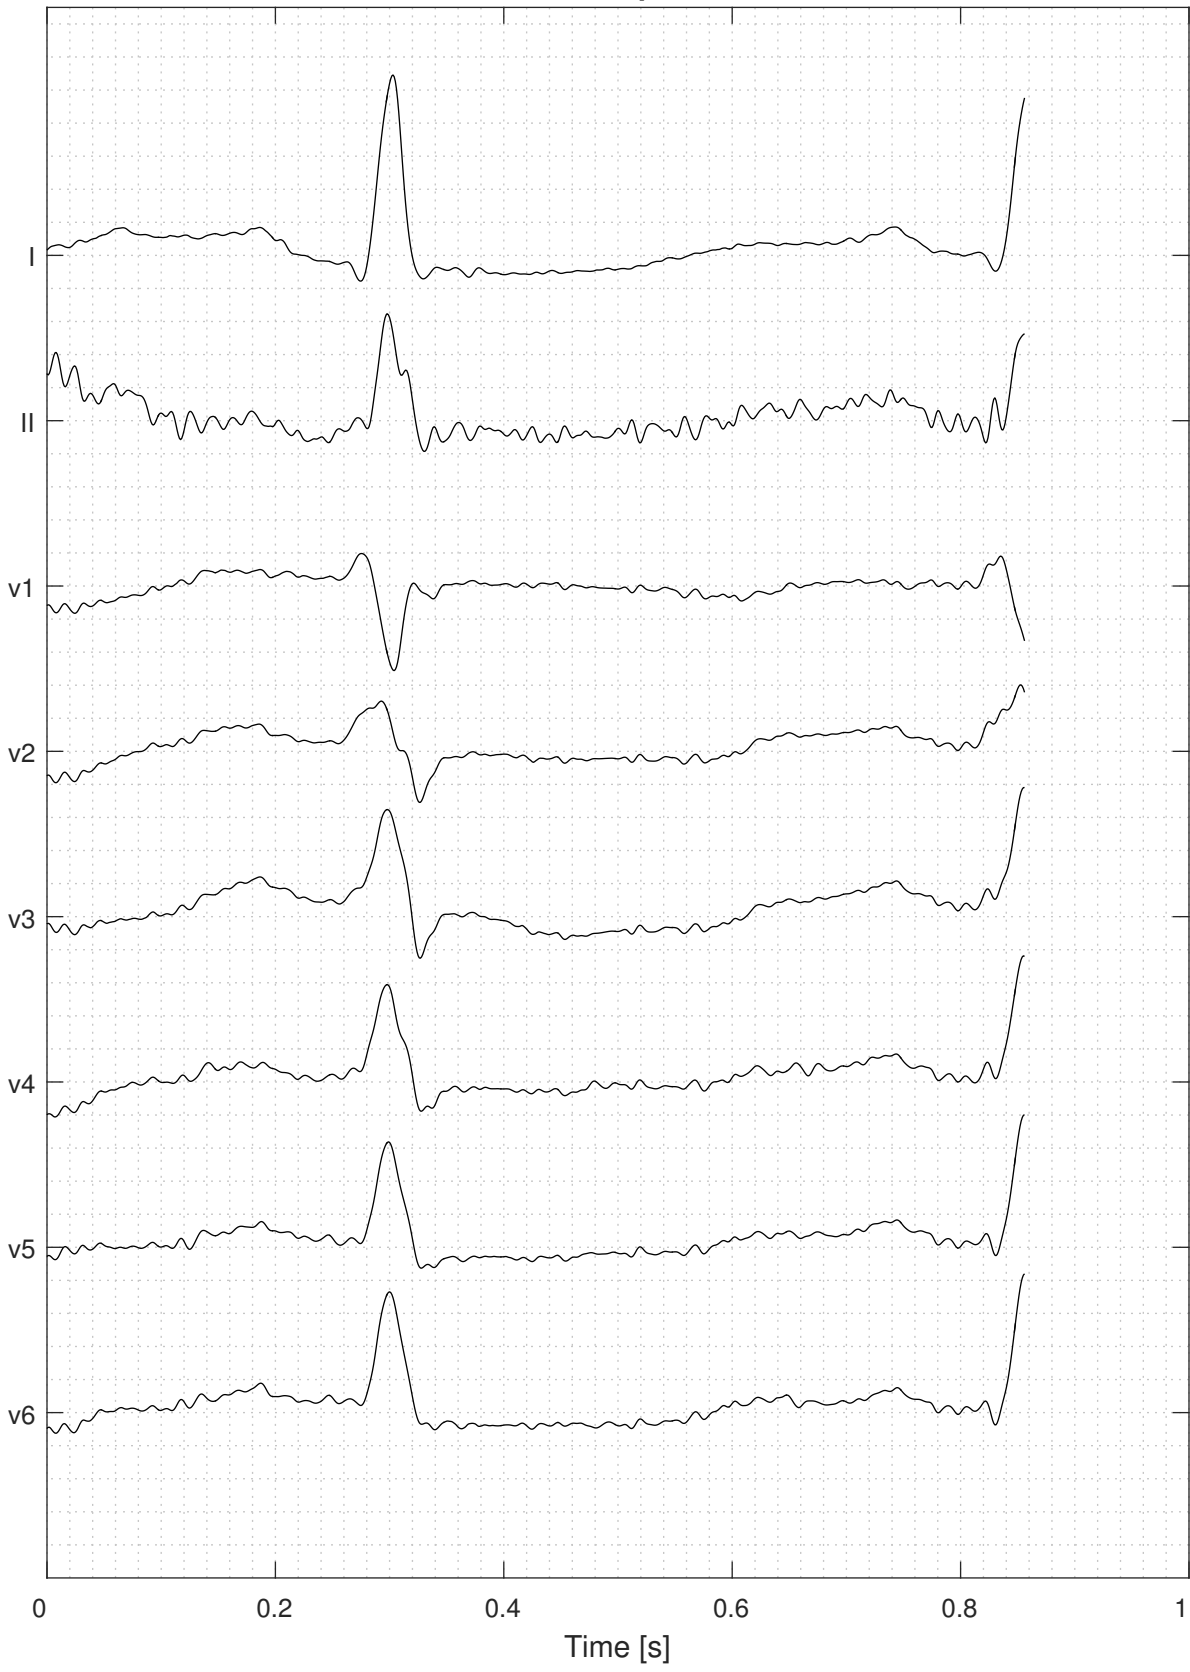

Mid RR, Complex #: 237

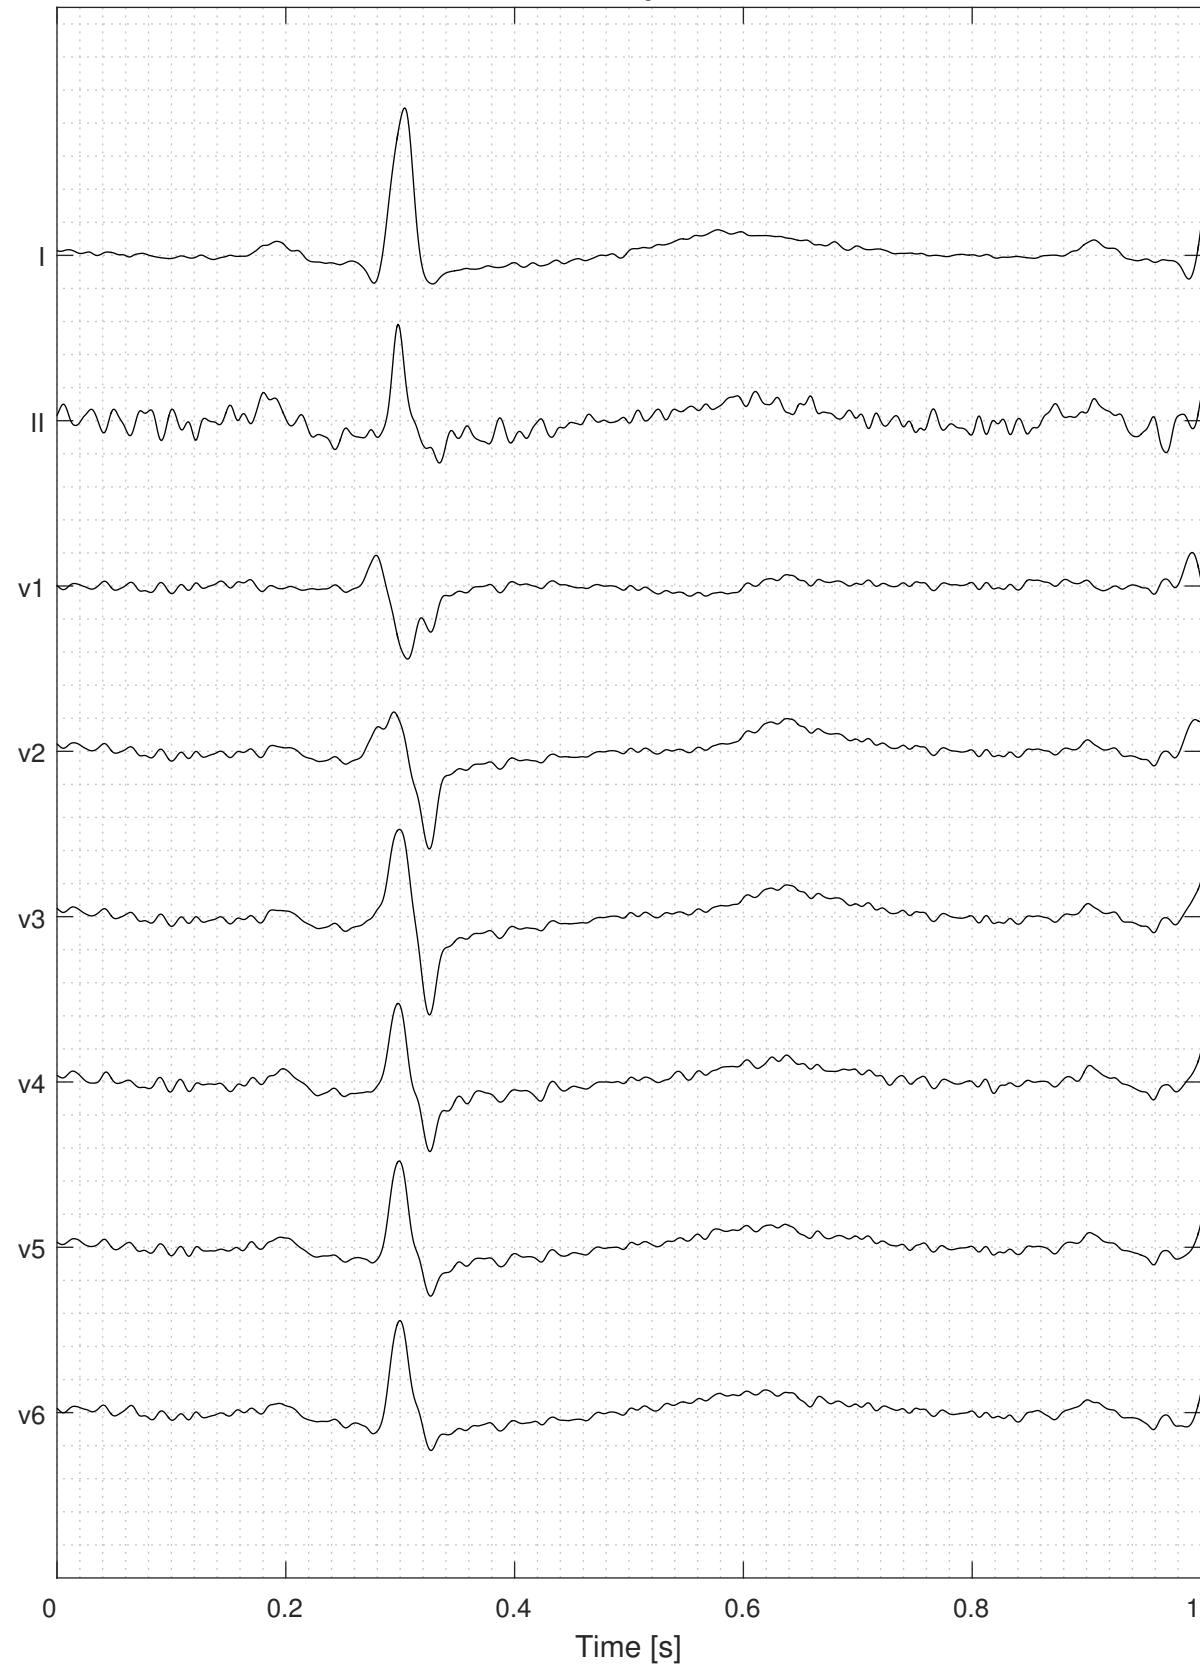

High RR, Complex #: 36

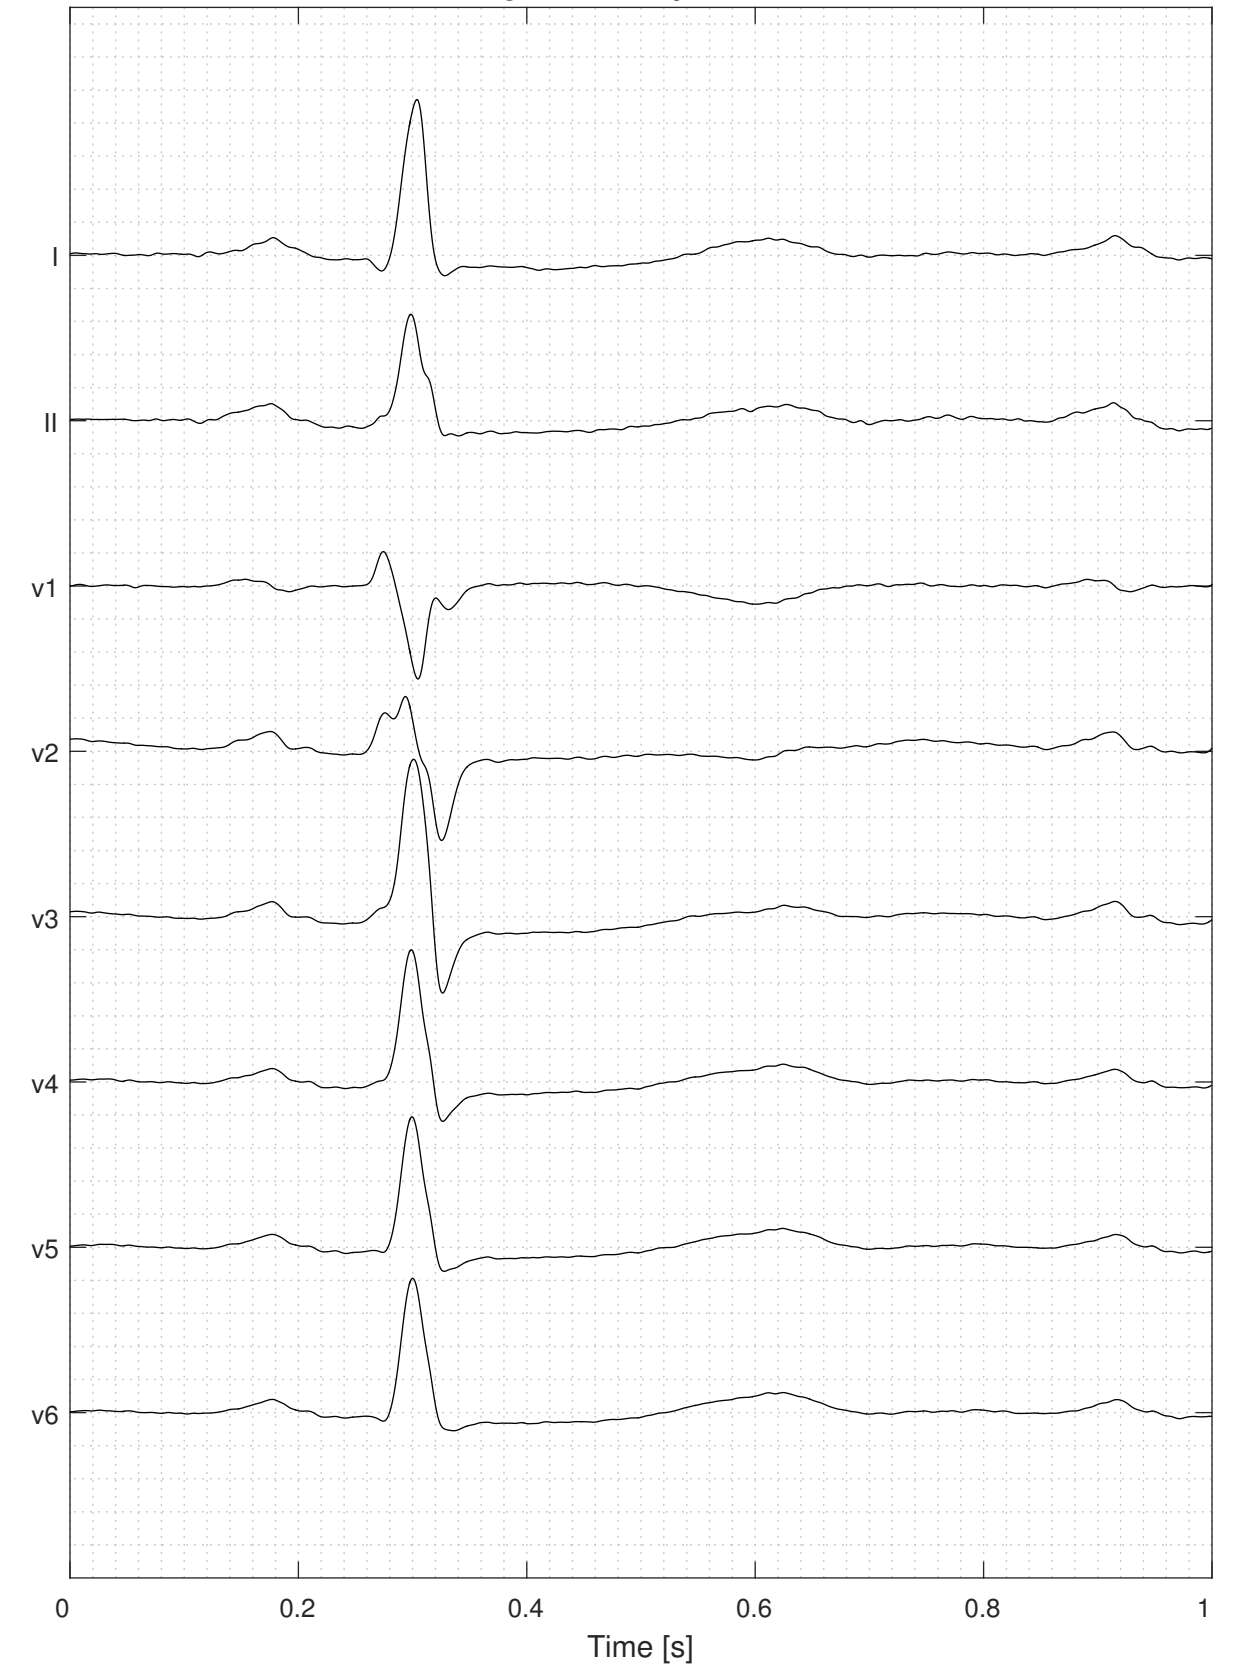

Patient 30

Low RR, Complex #: 111

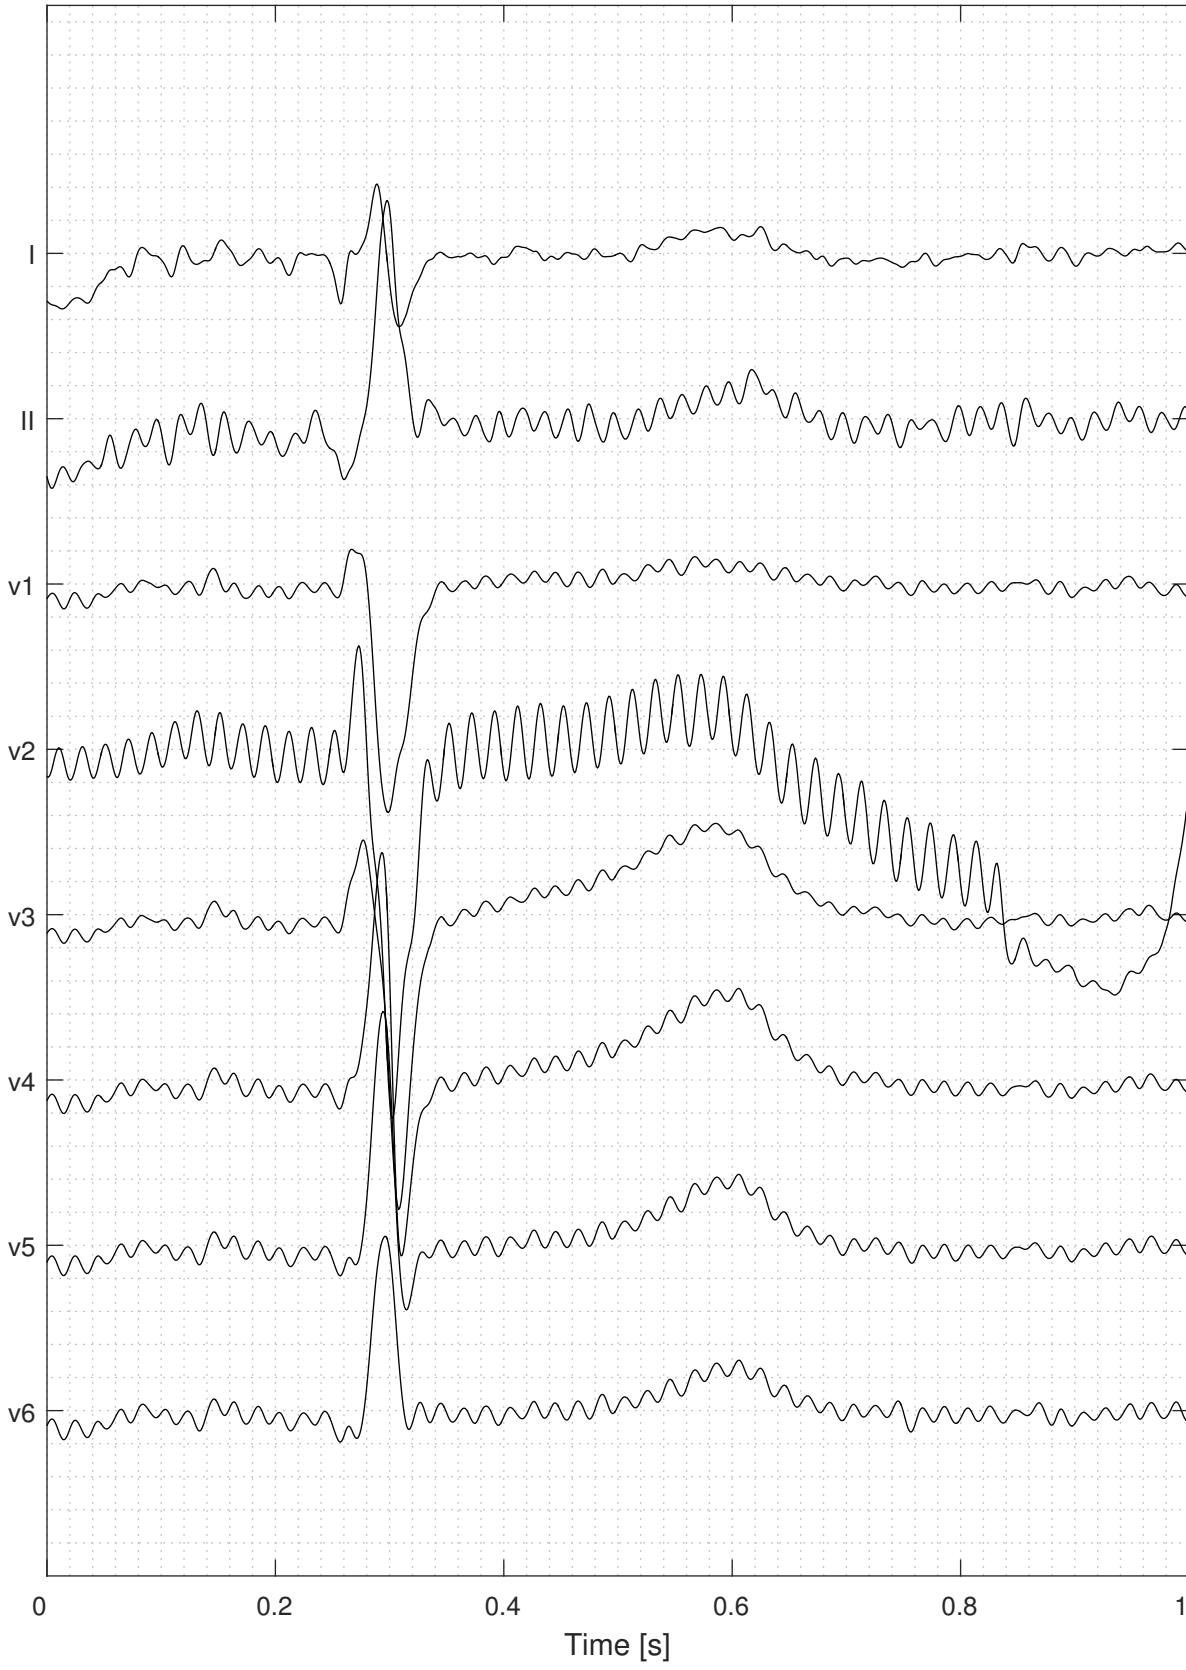

Mid RR, Complex #: 122

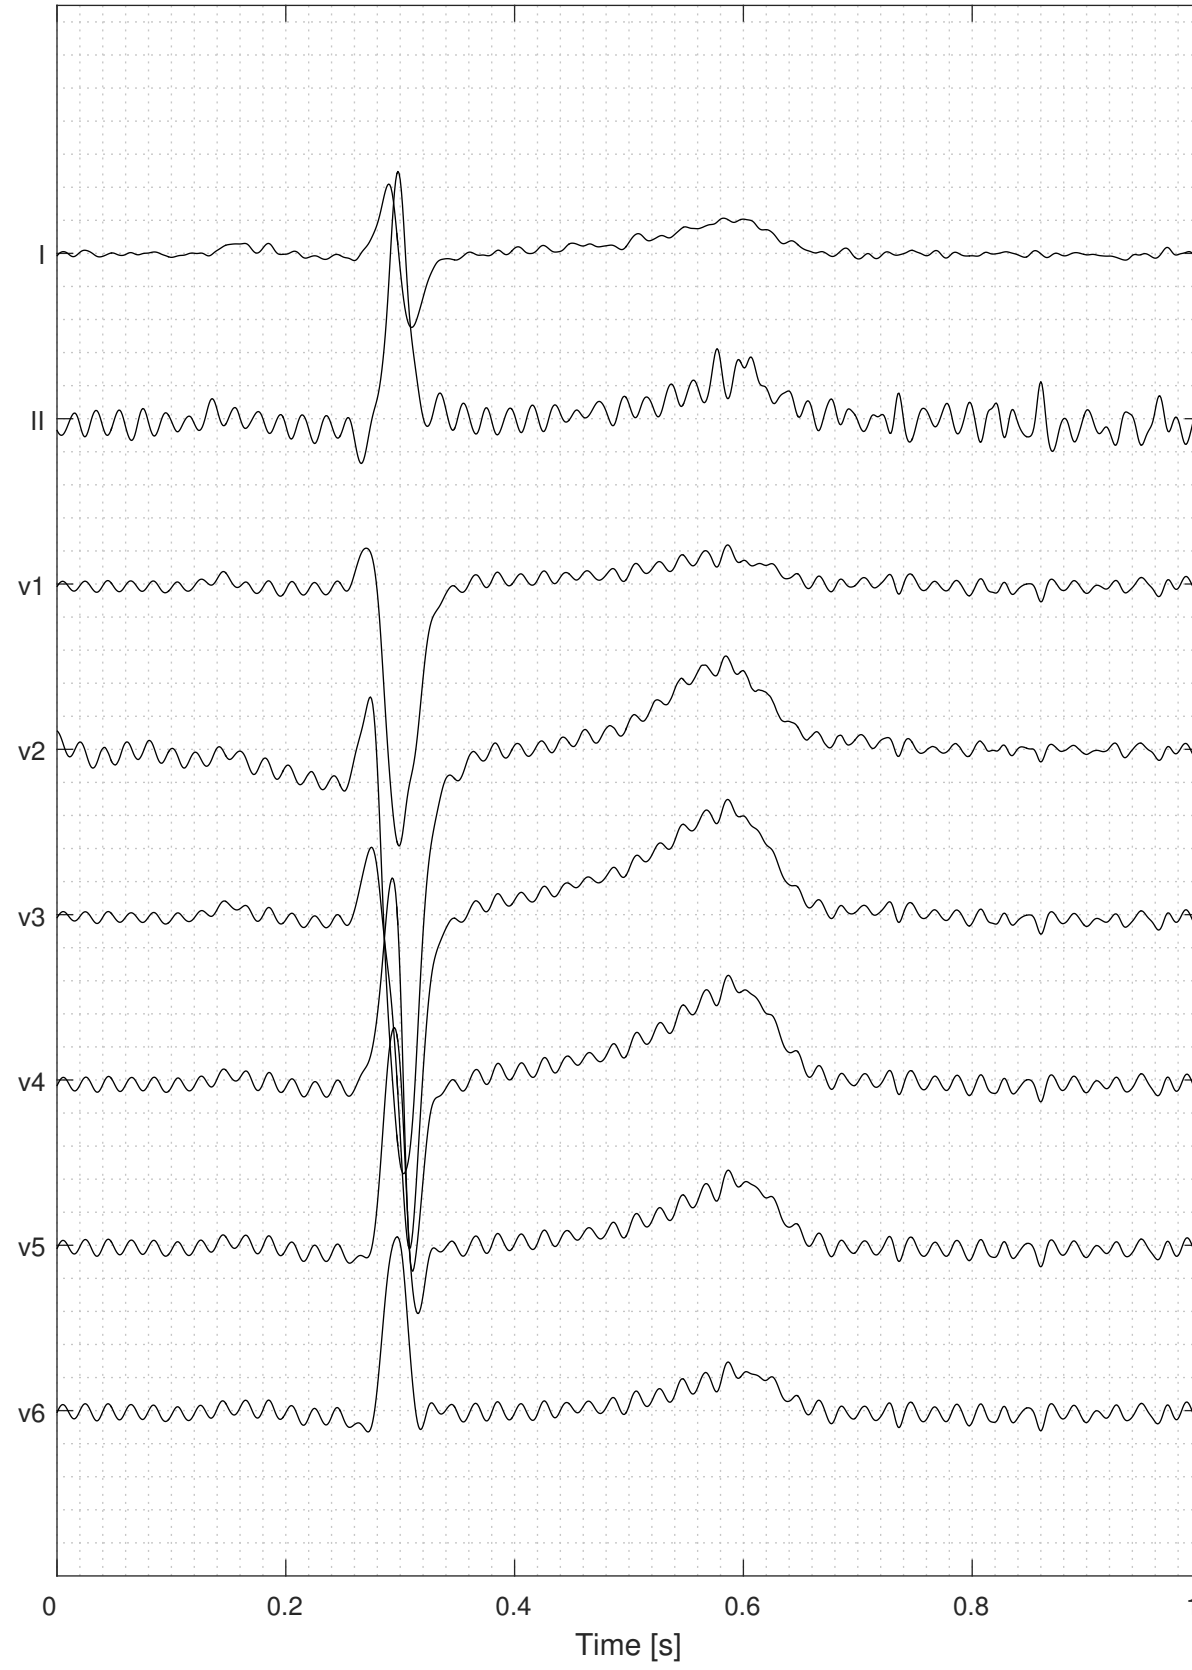

High RR, Complex #: 80

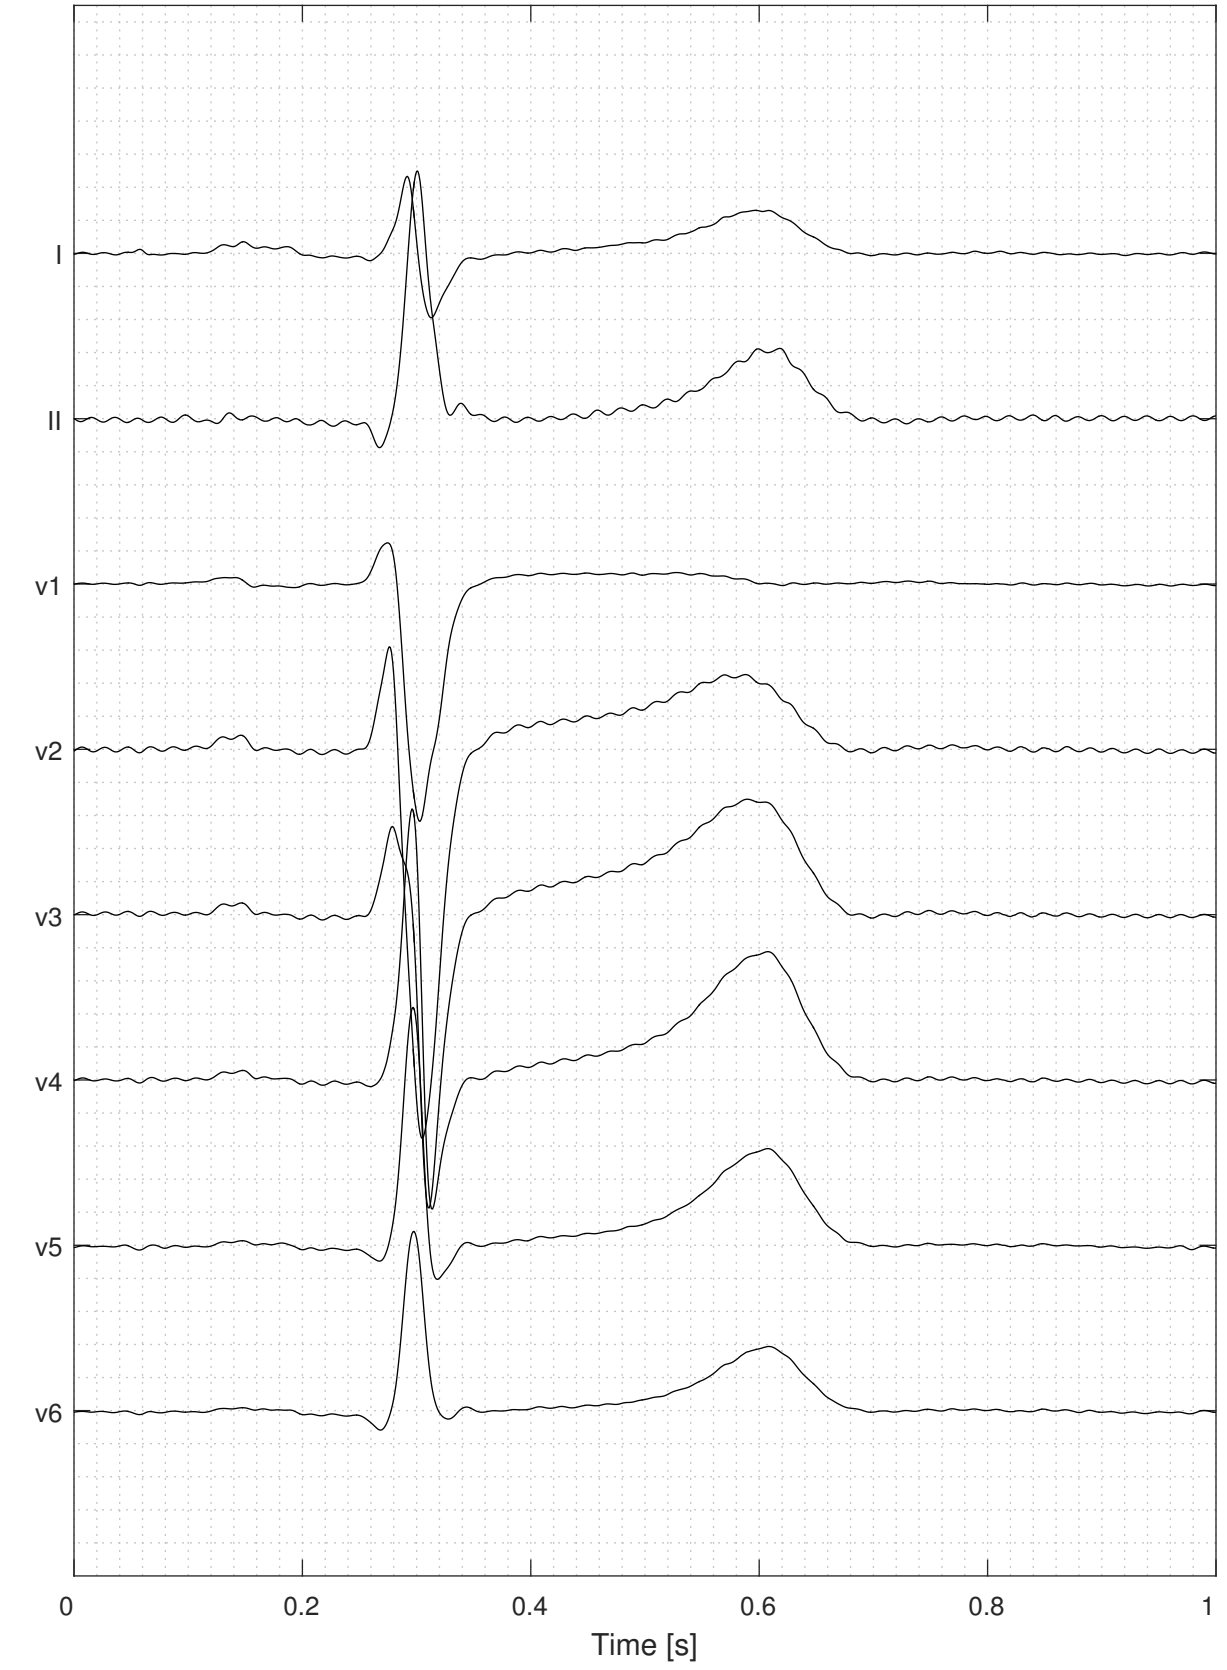

Patient 31

Low RR, Complex #: 322

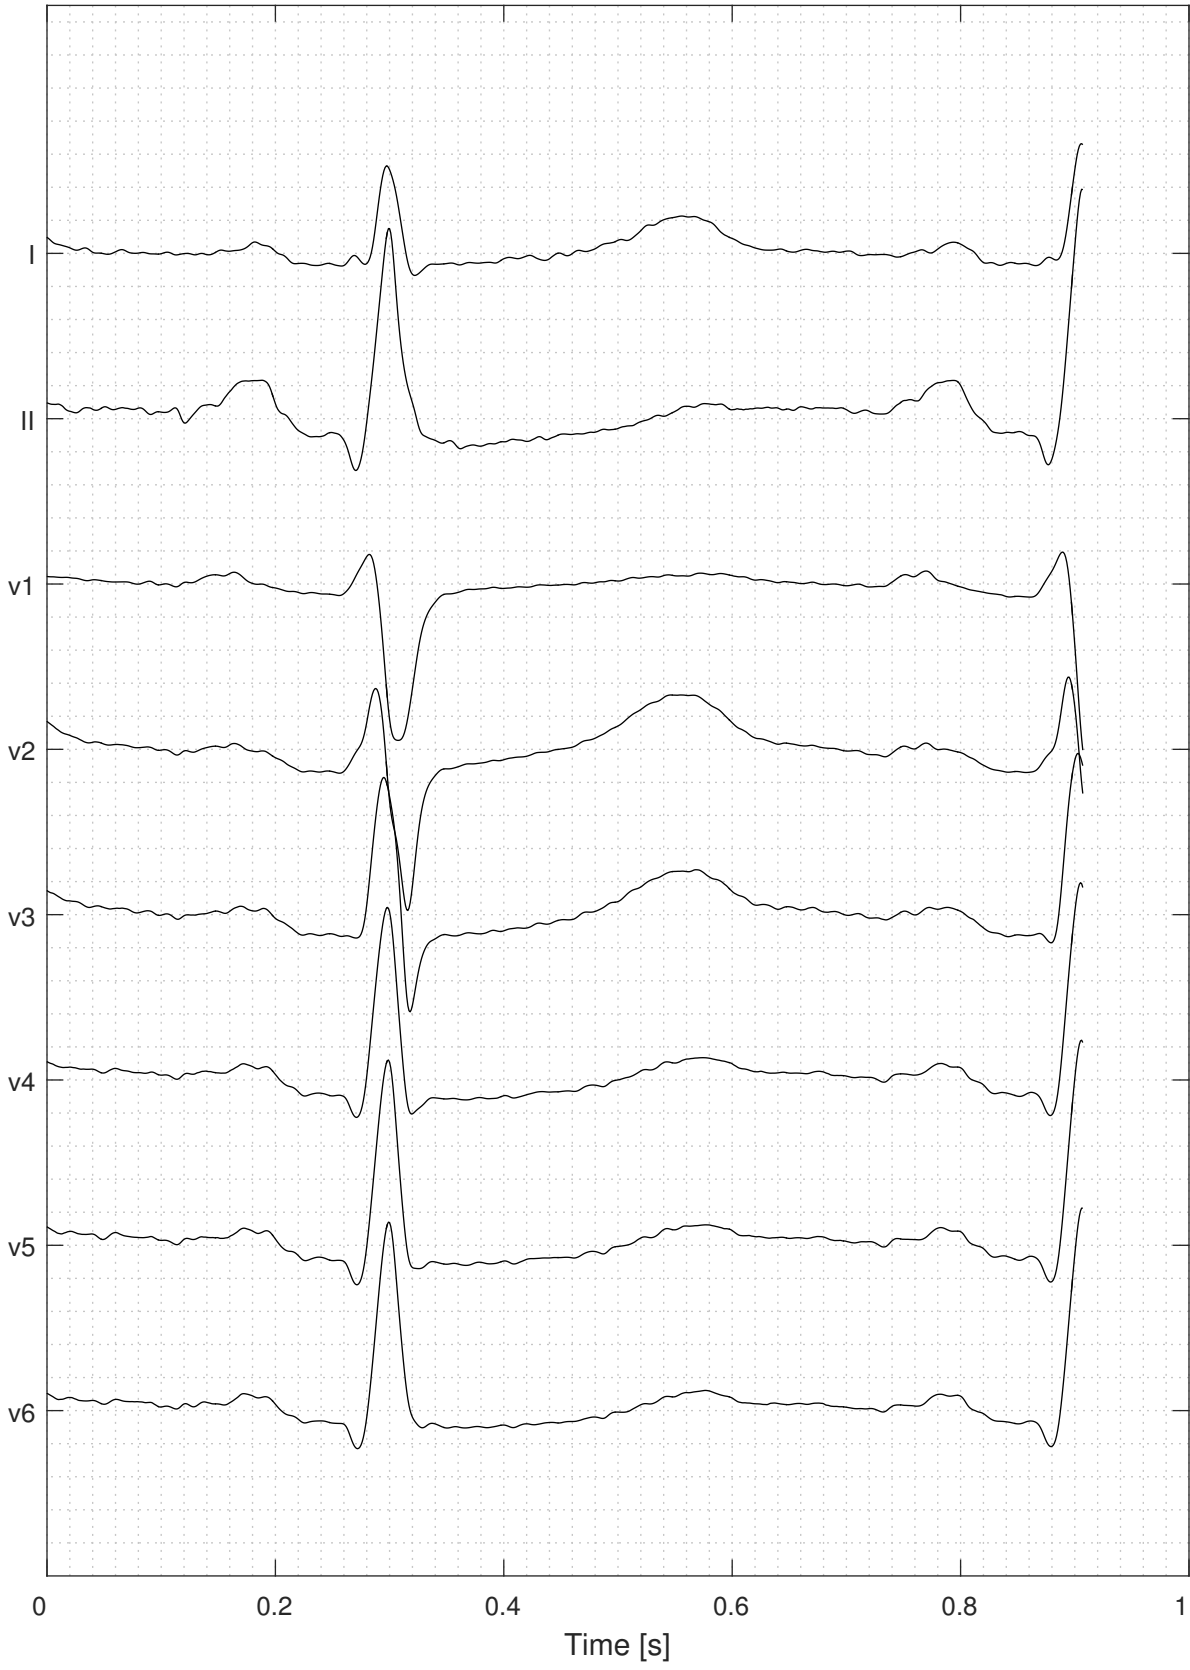

Mid RR, Complex #: 245

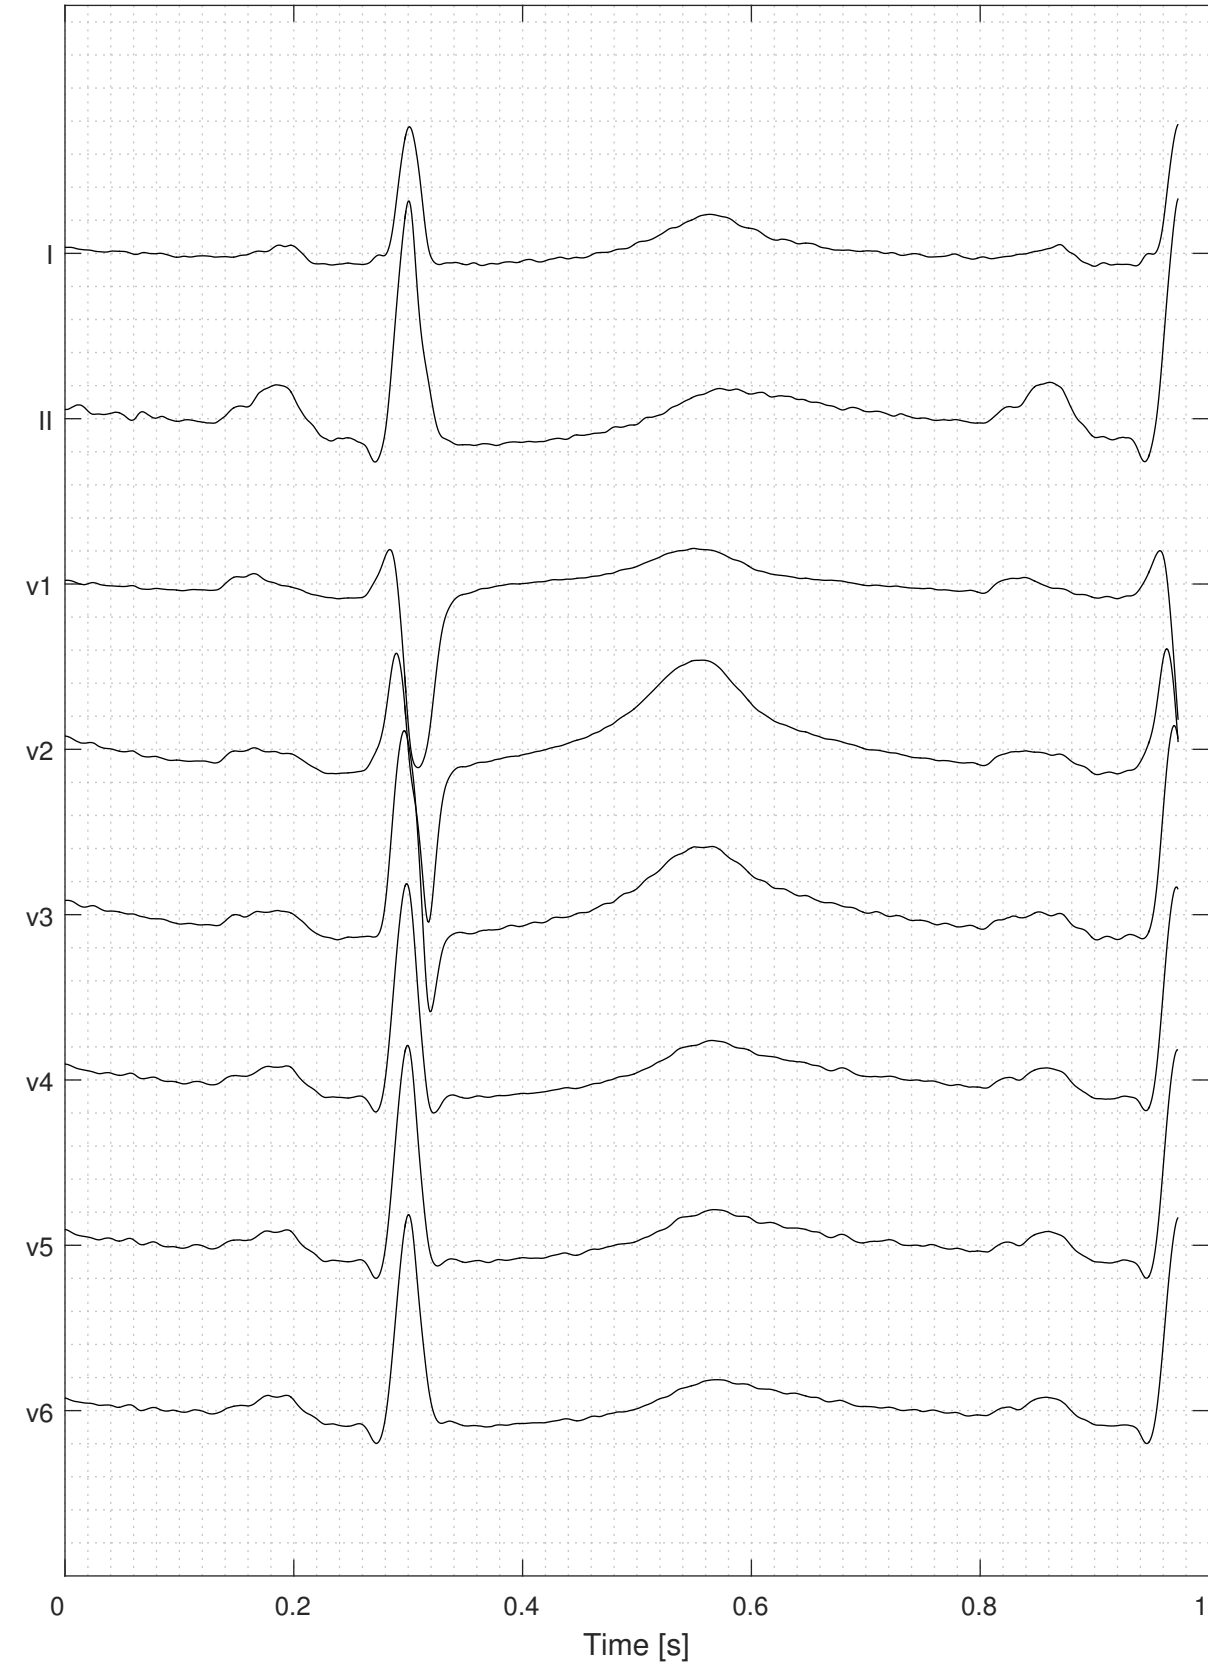

High RR, Complex #: 328

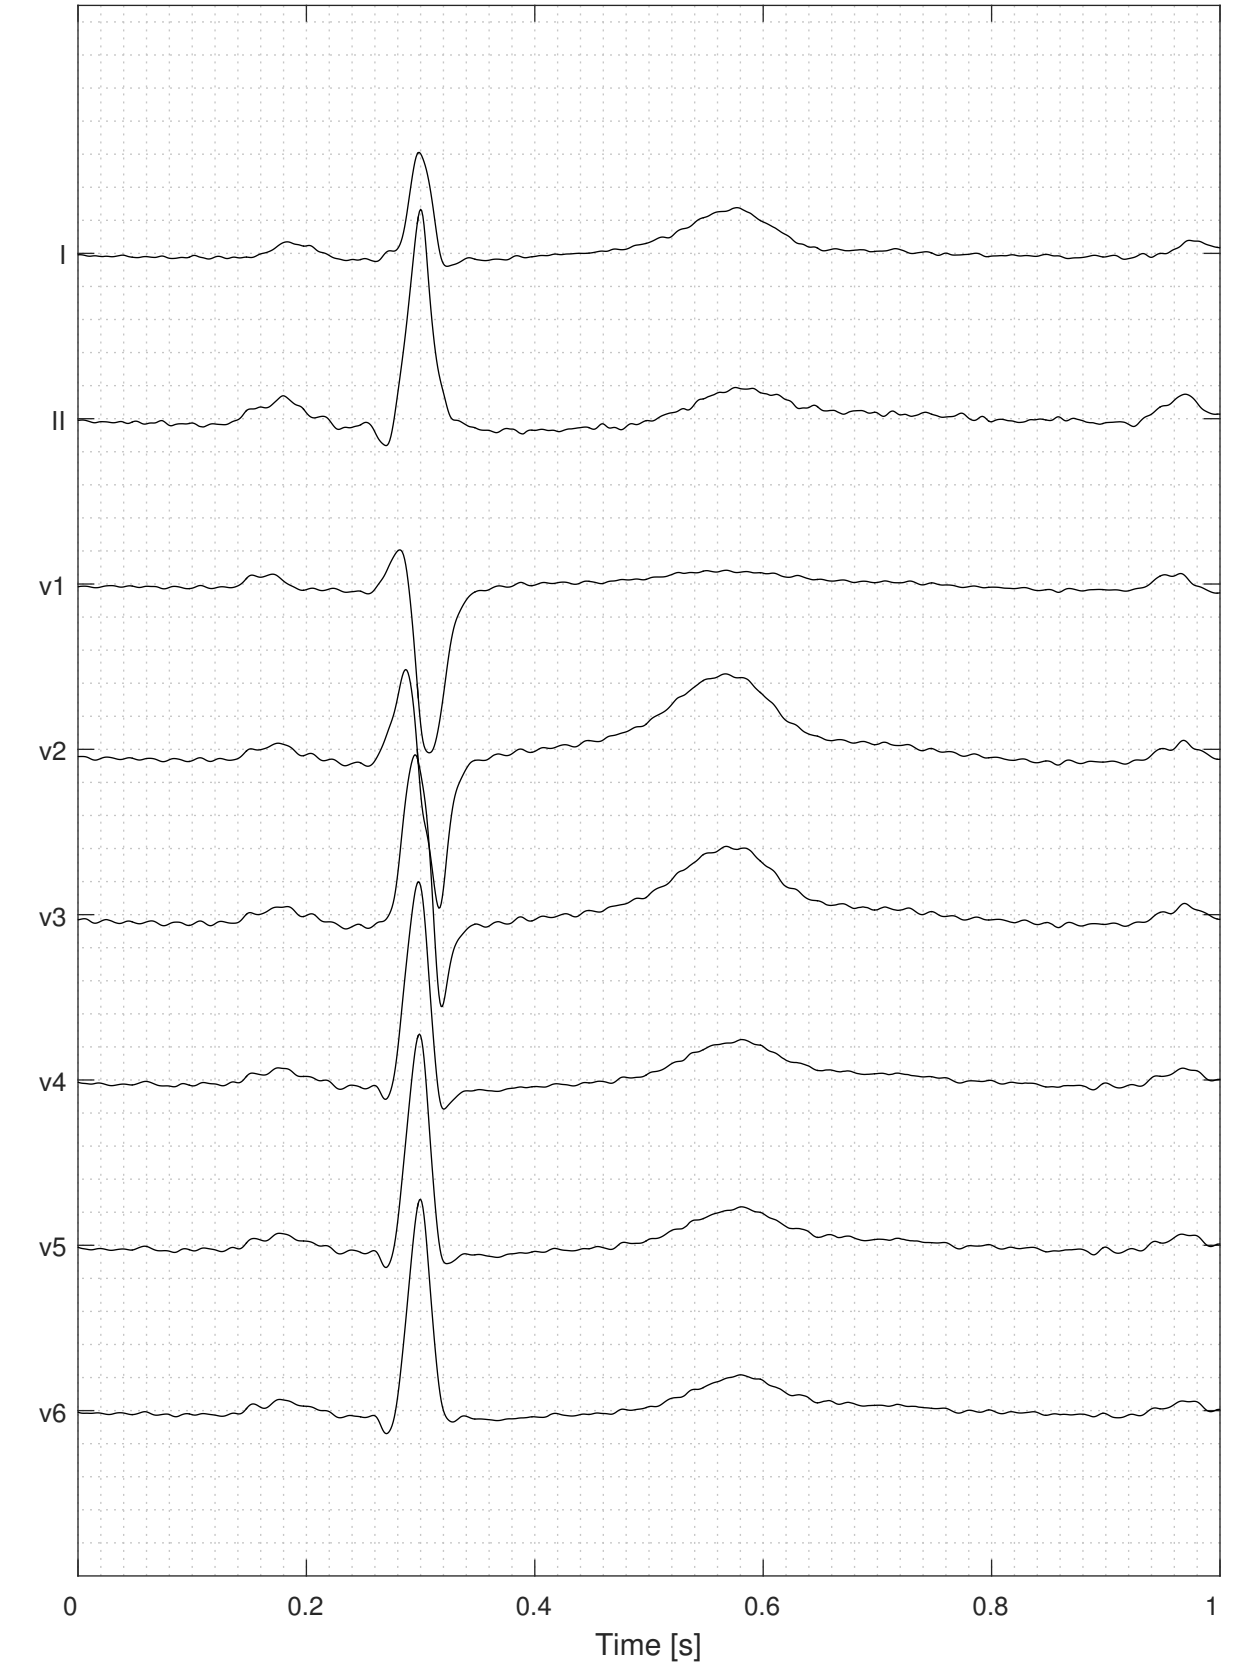

Patient 32

Low RR, Complex #: 106

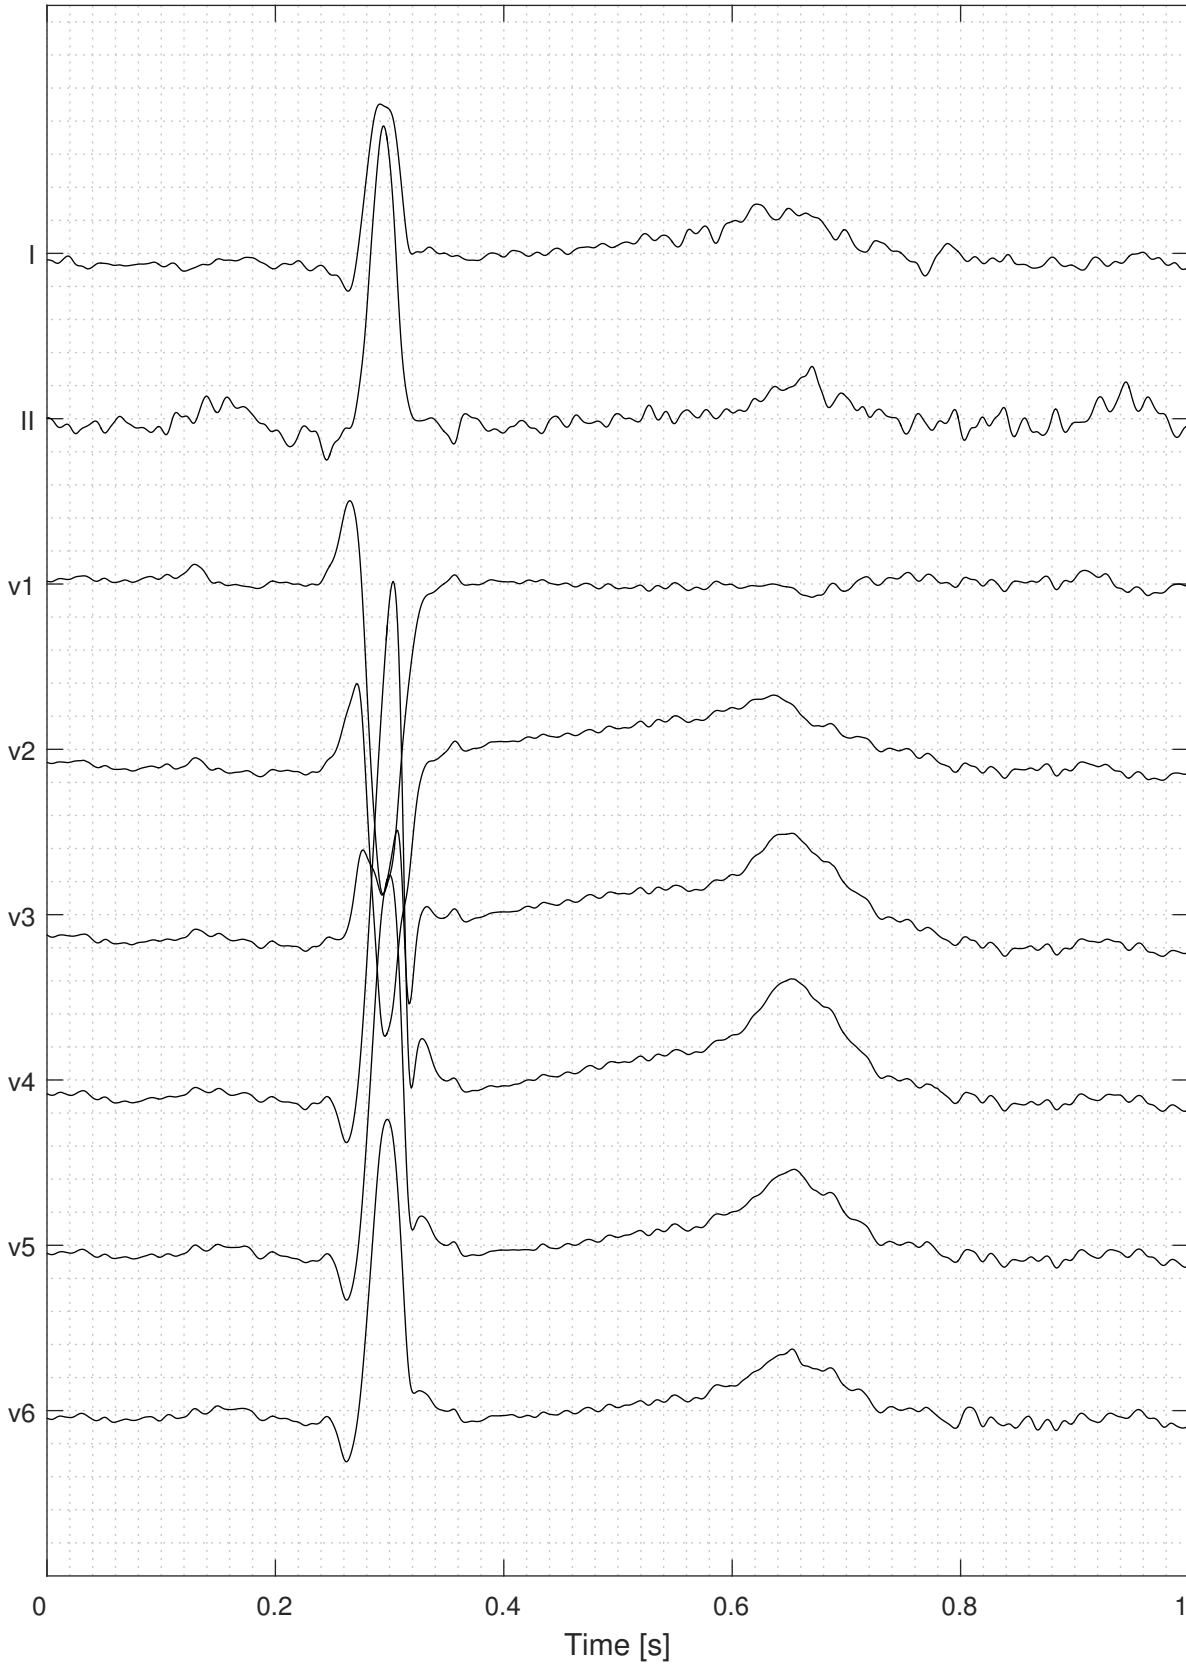

Mid RR, Complex #: 230

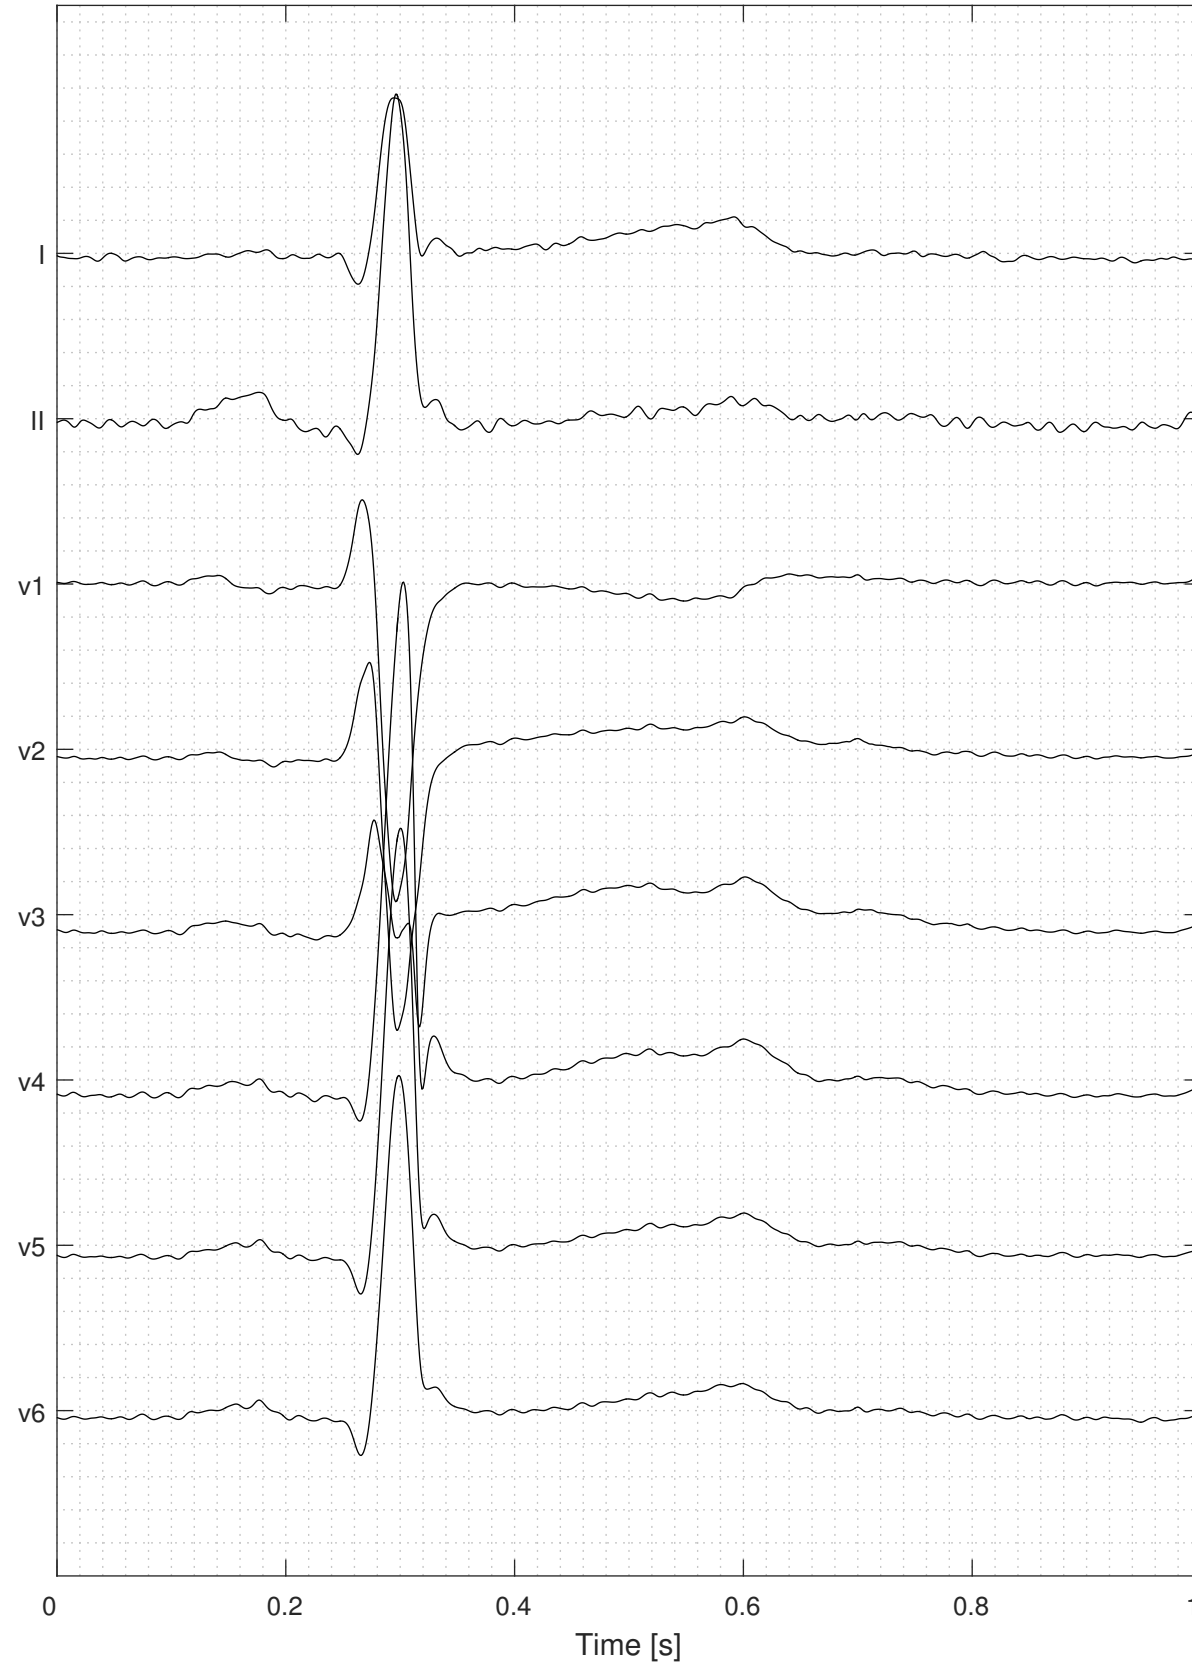

High RR, Complex #: 73

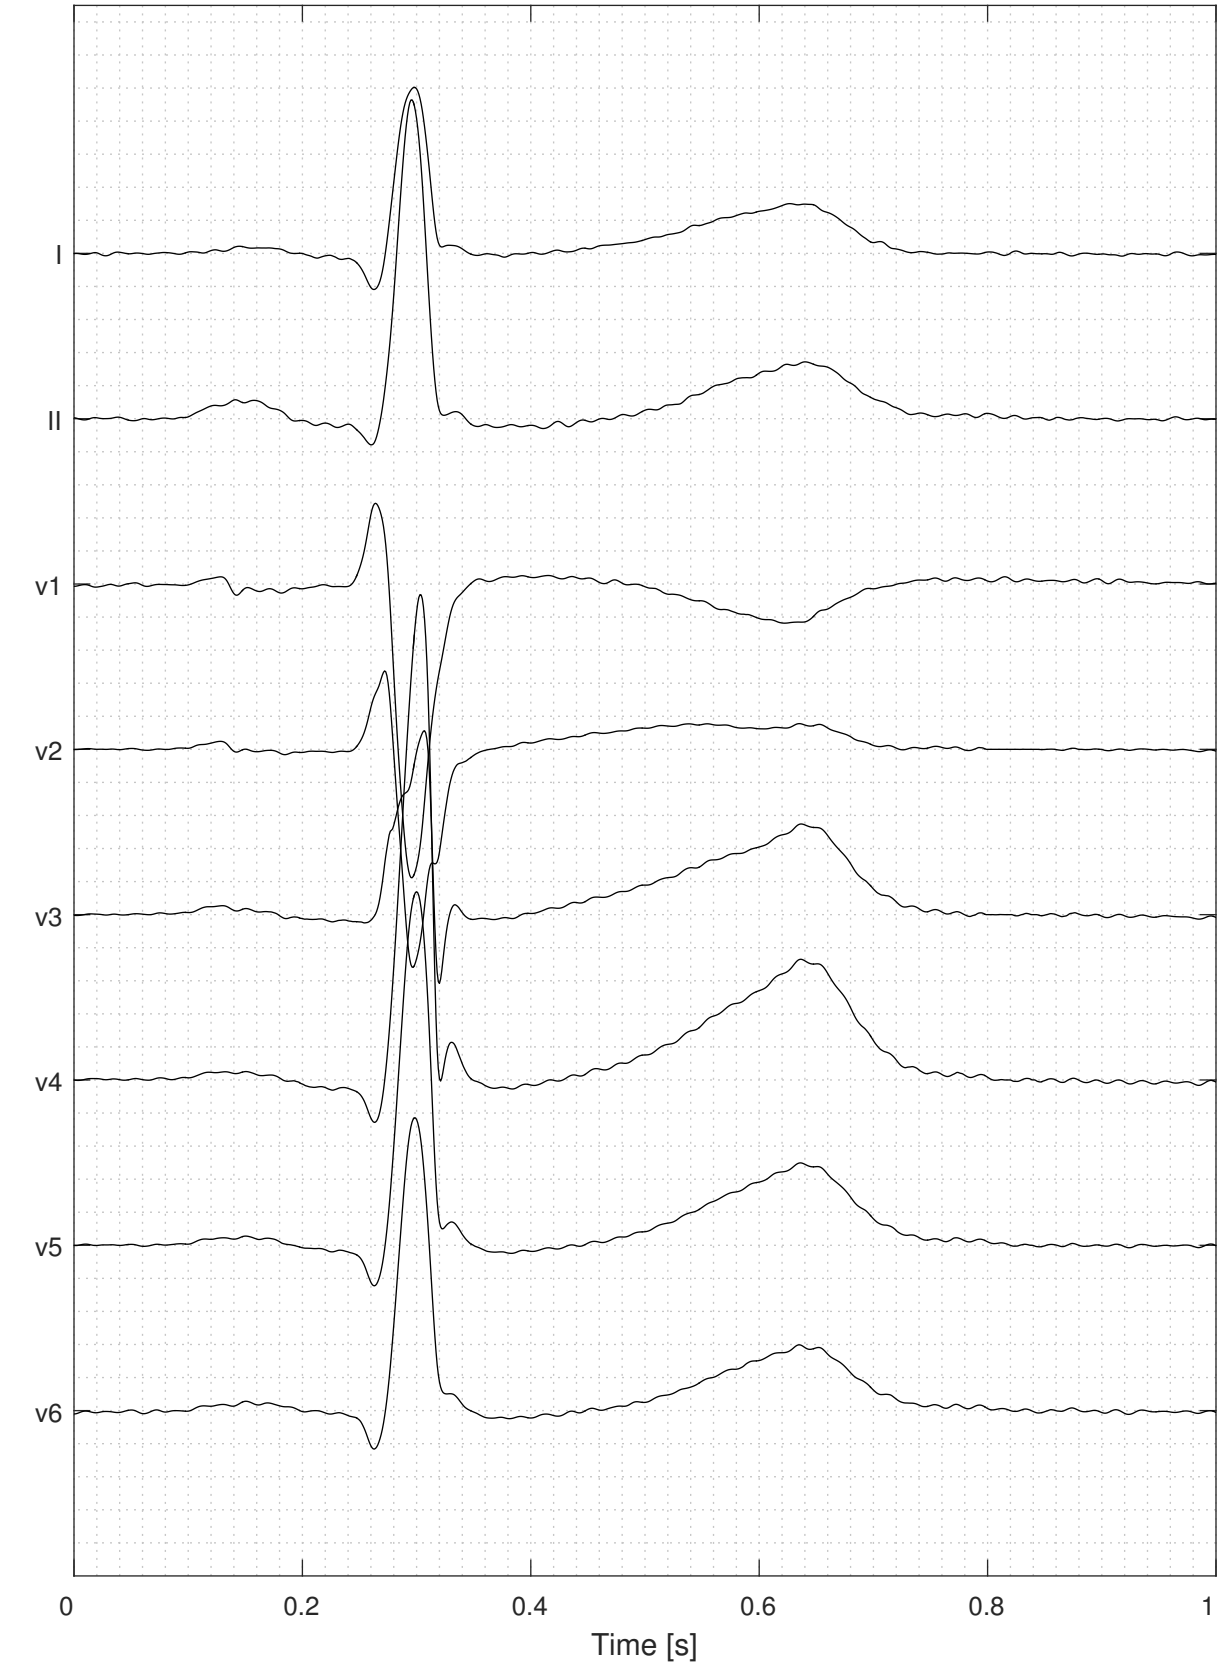



Patient 33

Low RR, Complex #: 241

Mid RR, Complex #: 62

High RR, Complex #: 120

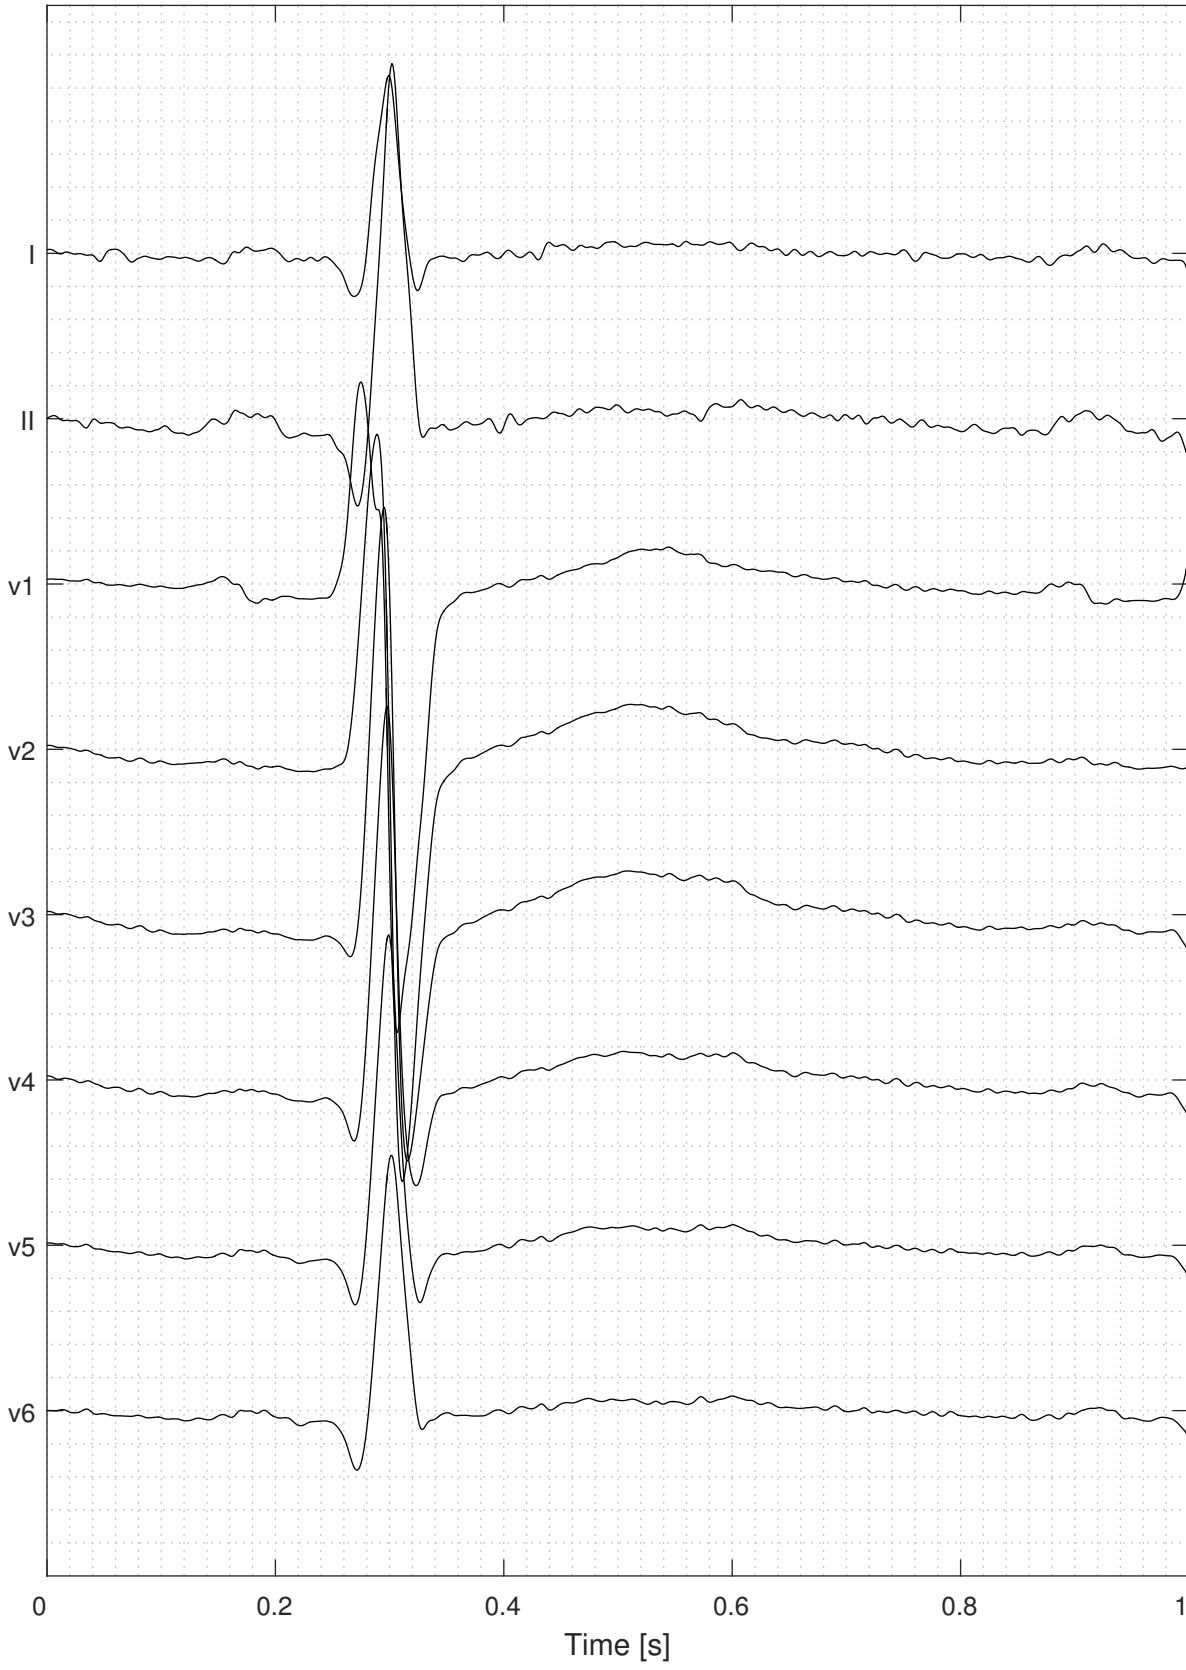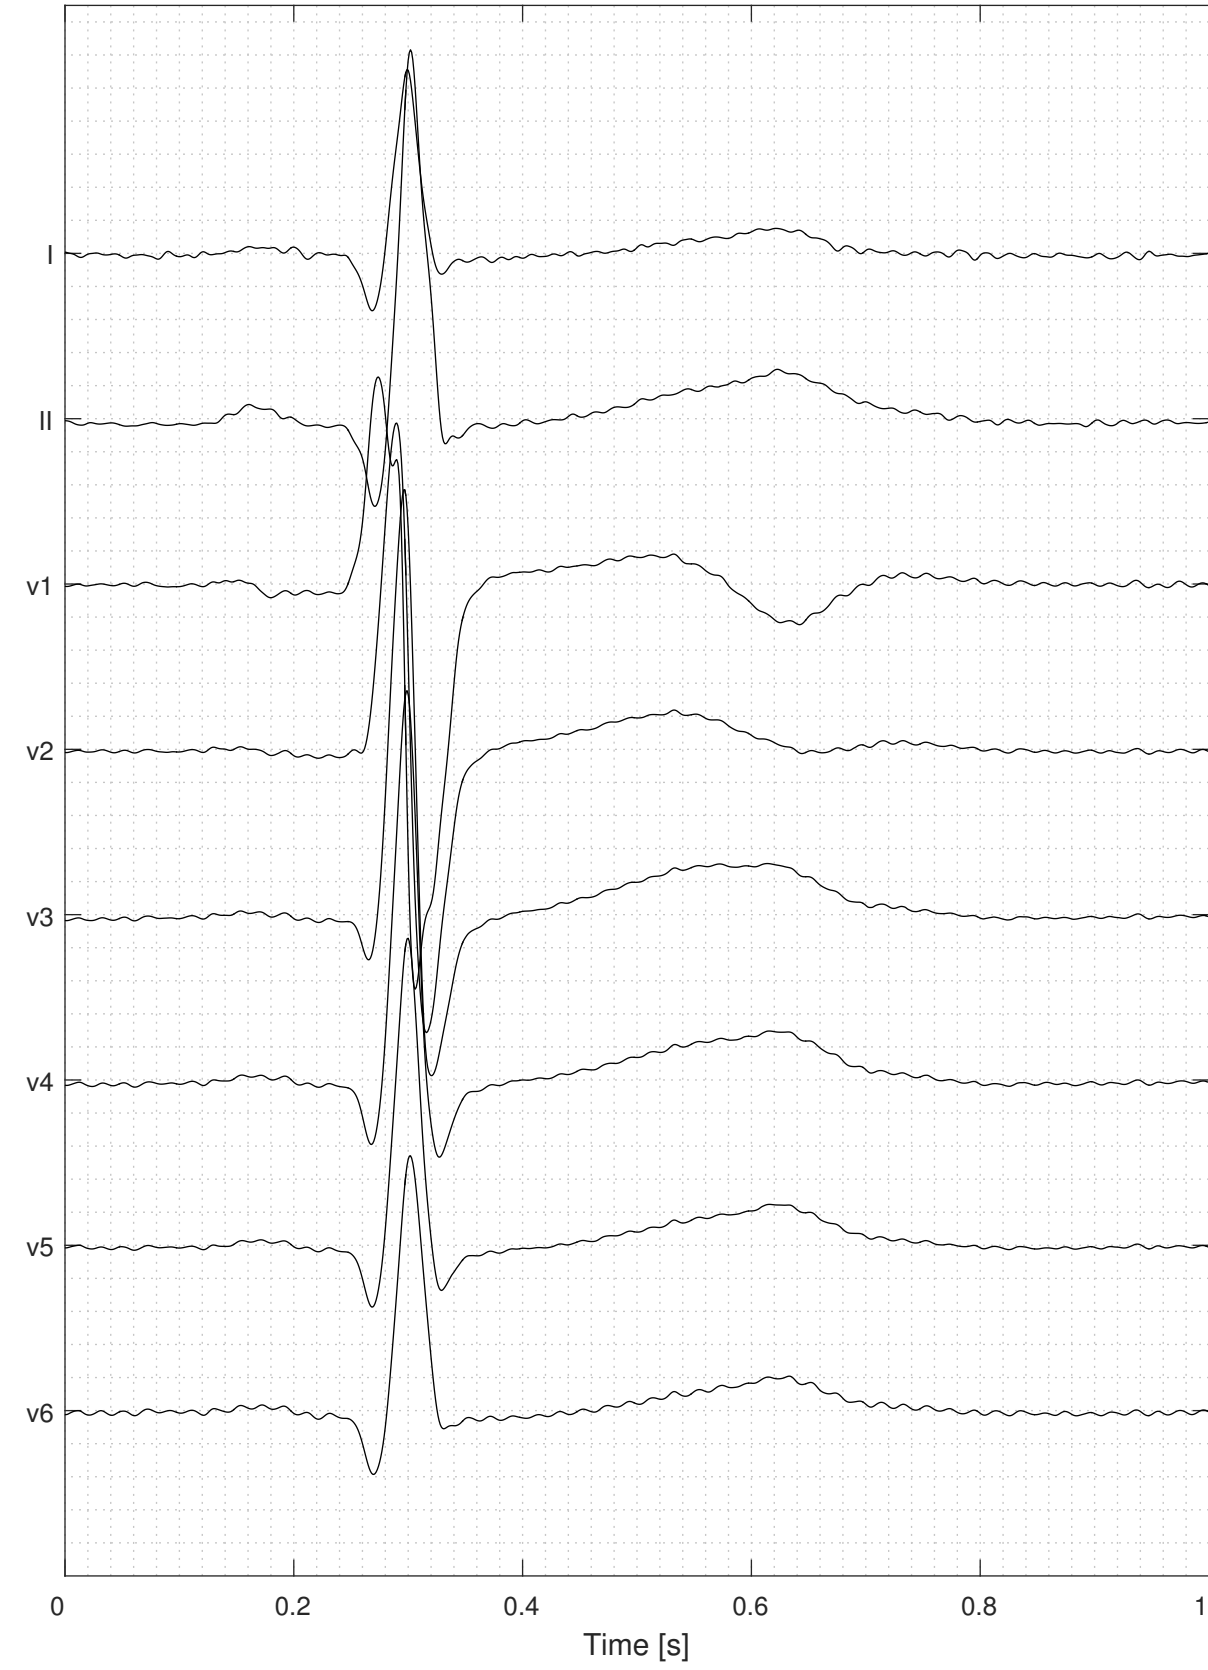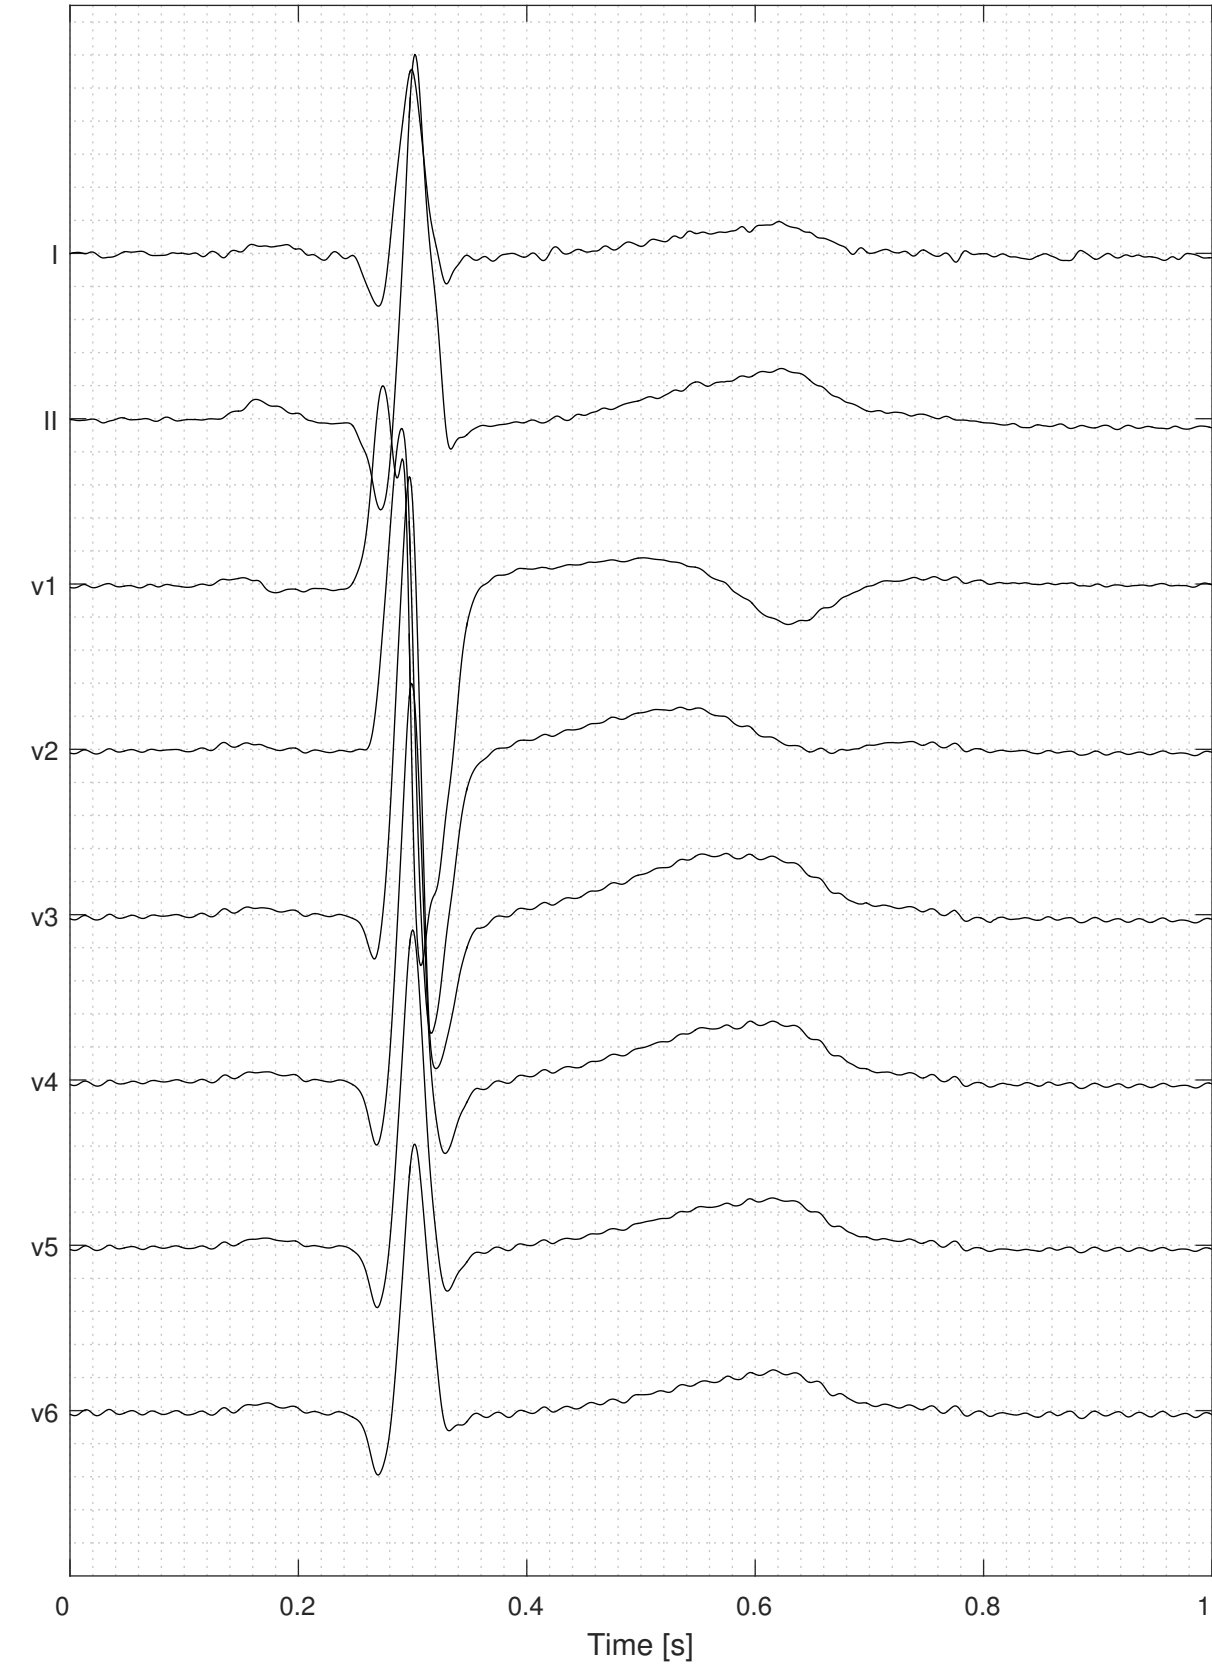

Patient 34

Low RR, Complex #: 124

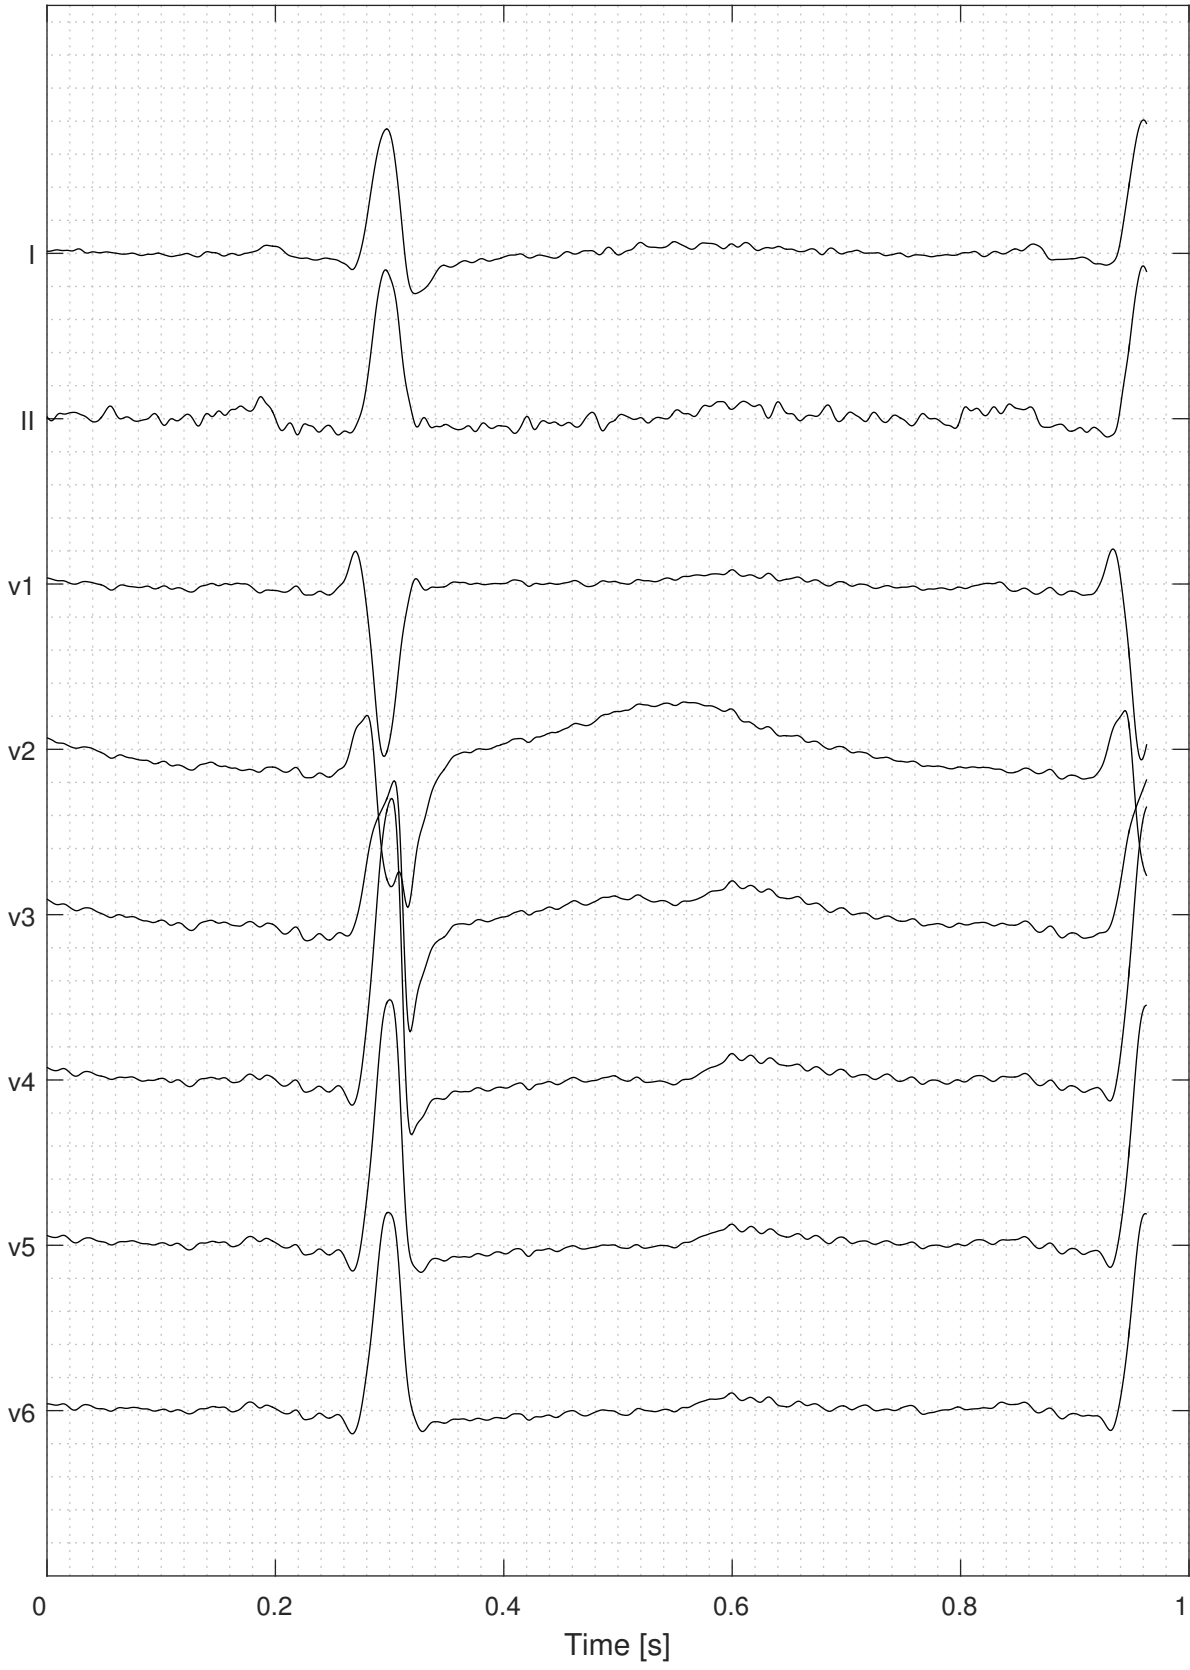

Mid RR, Complex #: 55

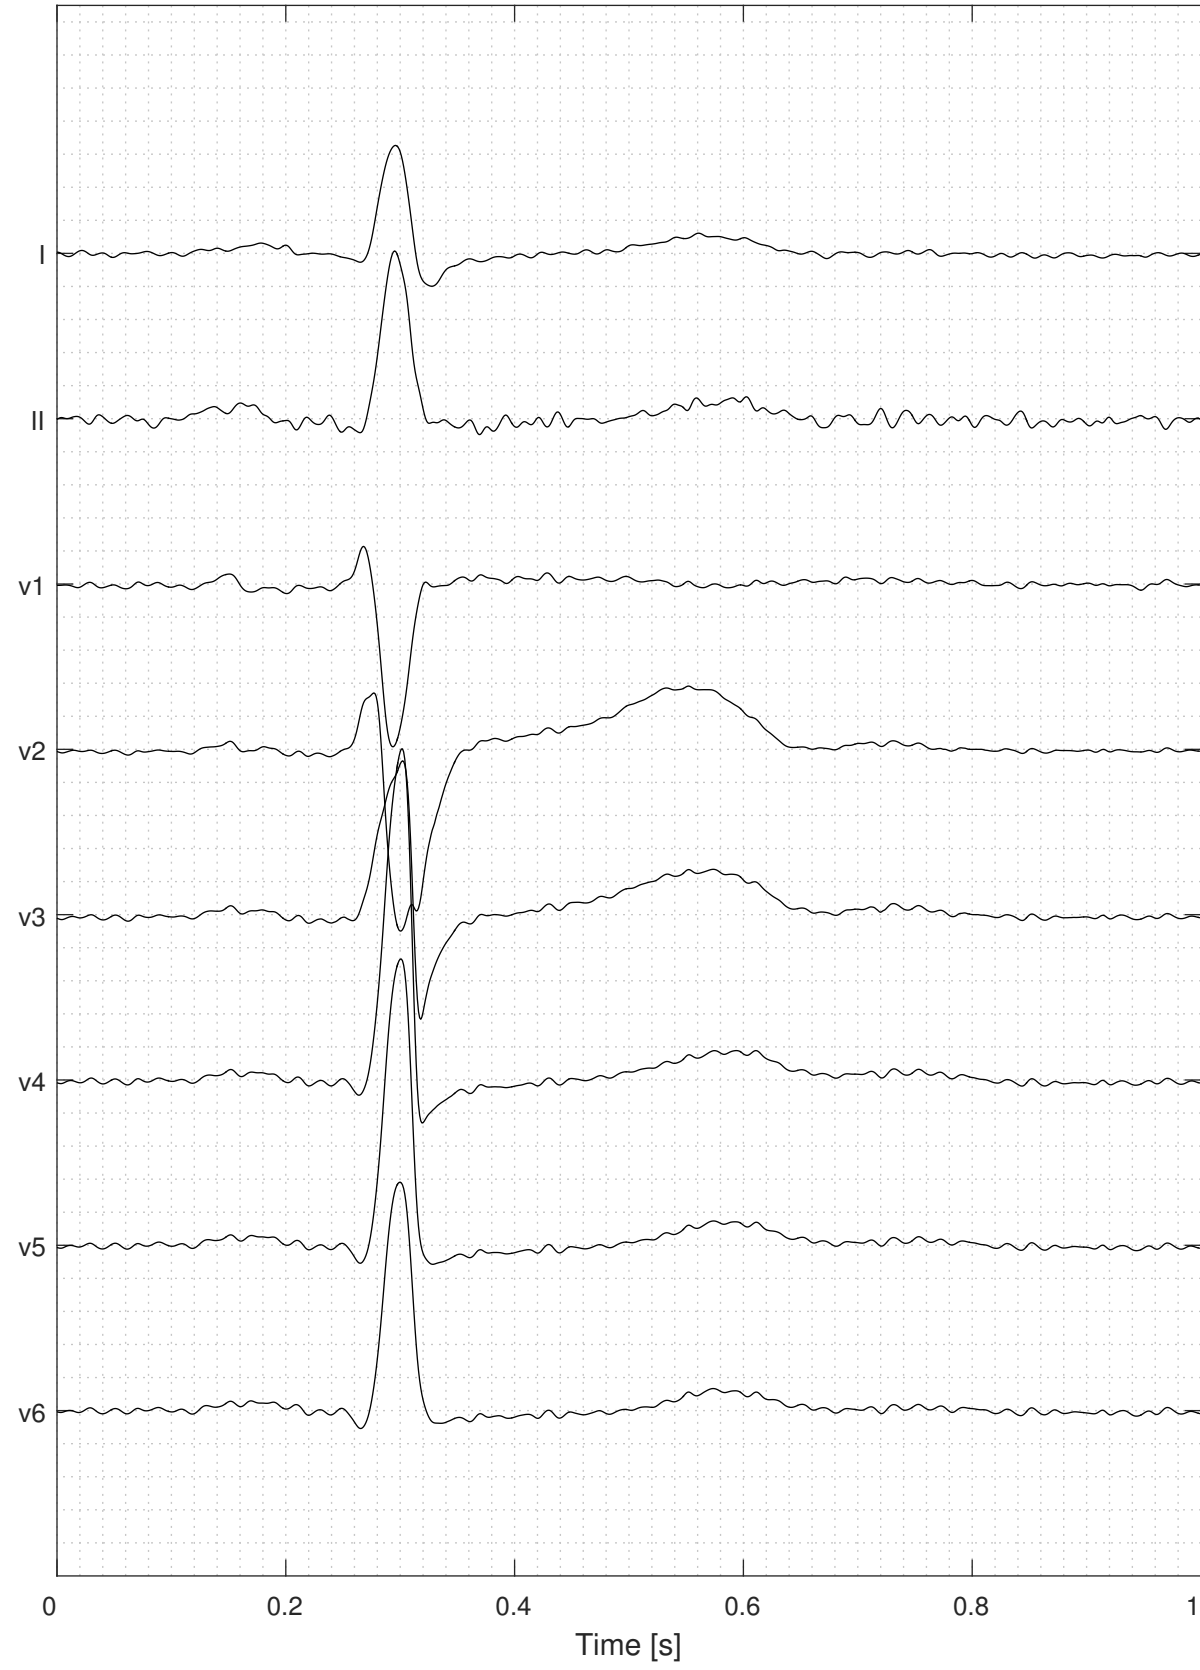

High RR, Complex #: 21

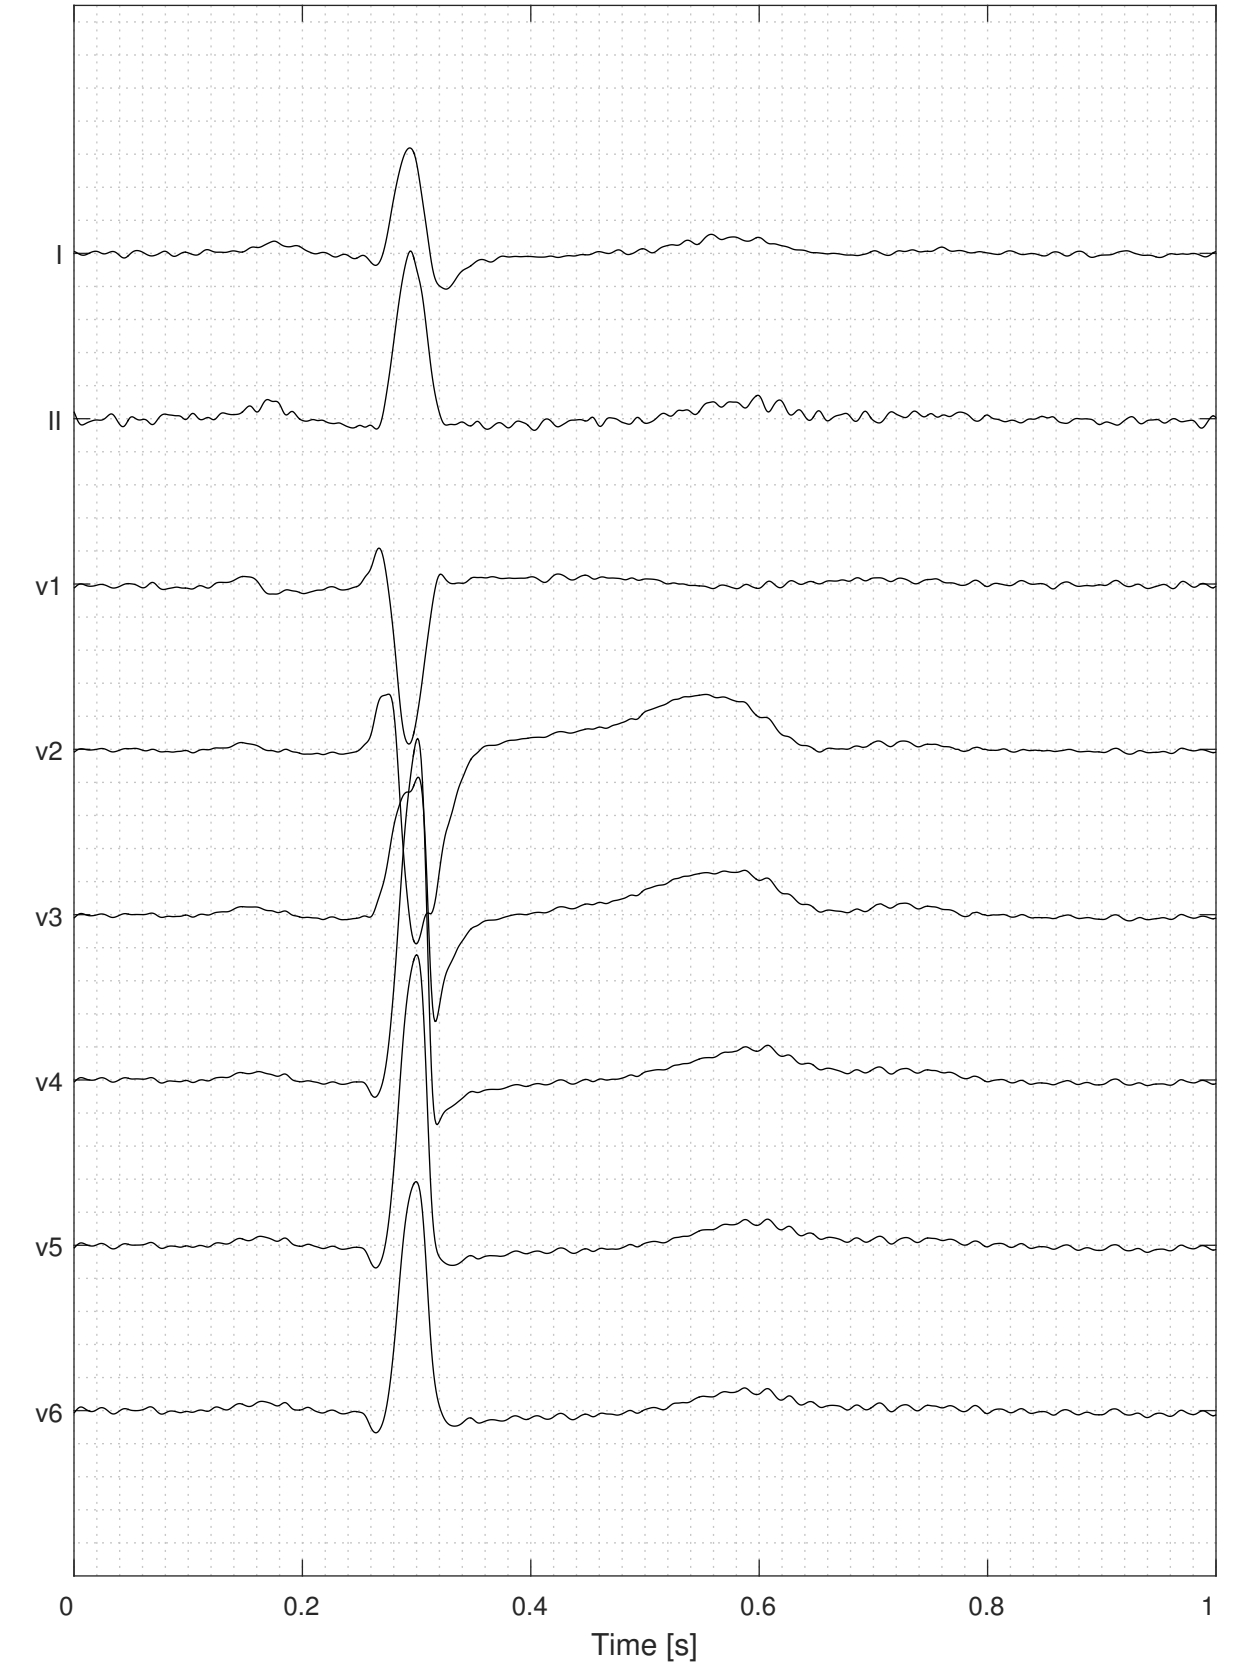

Patient 35

Low RR, Complex #: 285

Mid RR, Complex #: 72

High RR, Complex #: 11

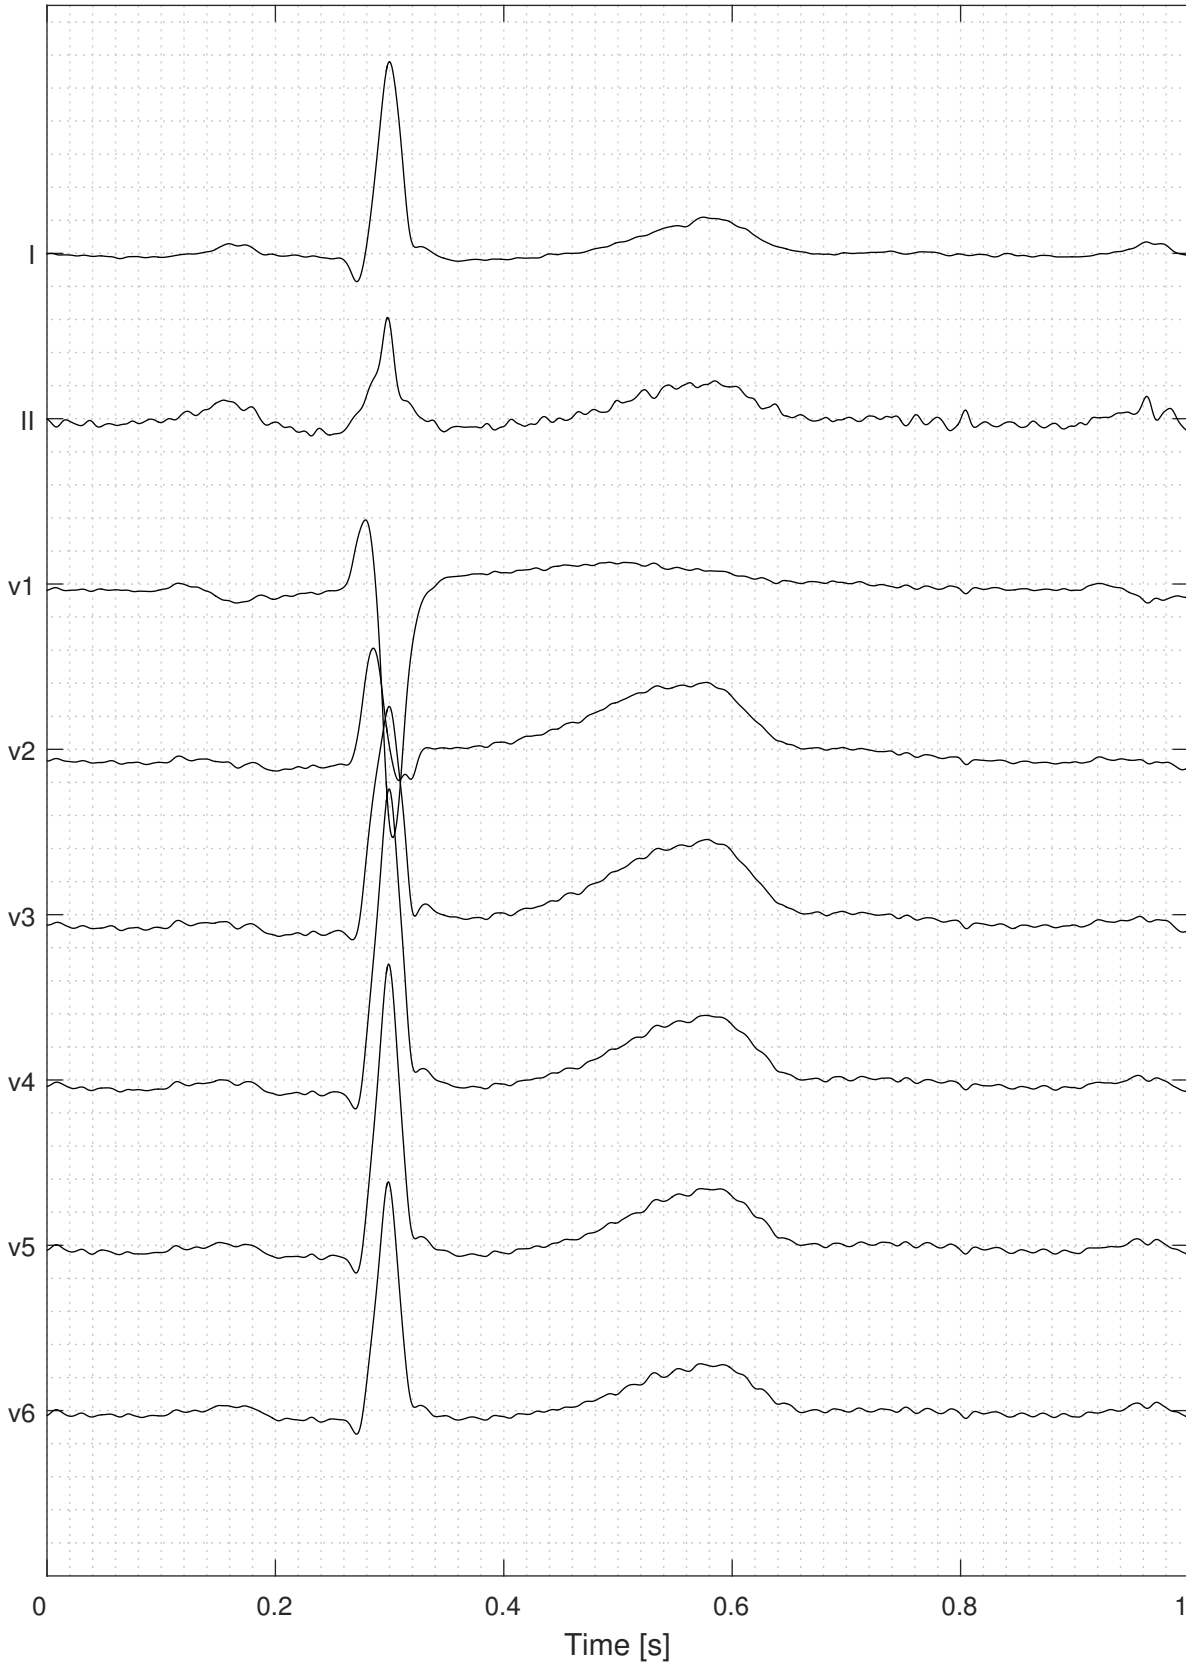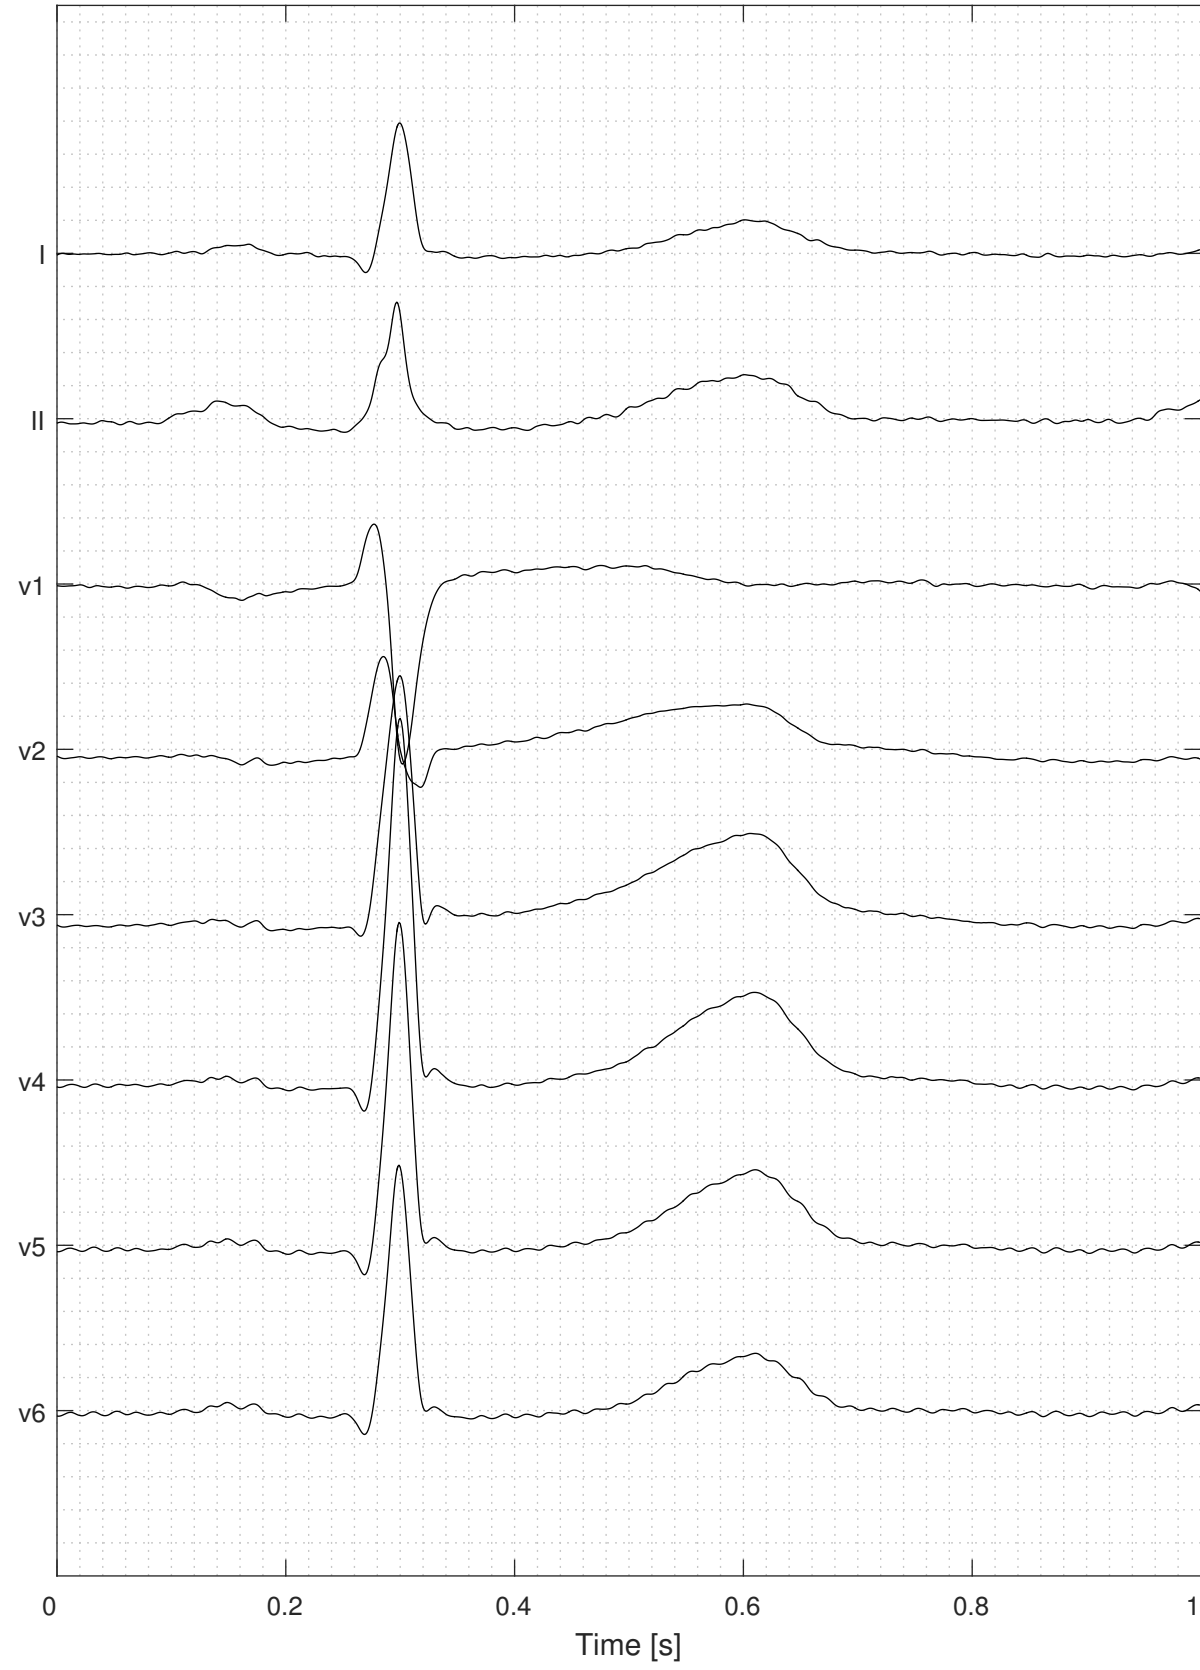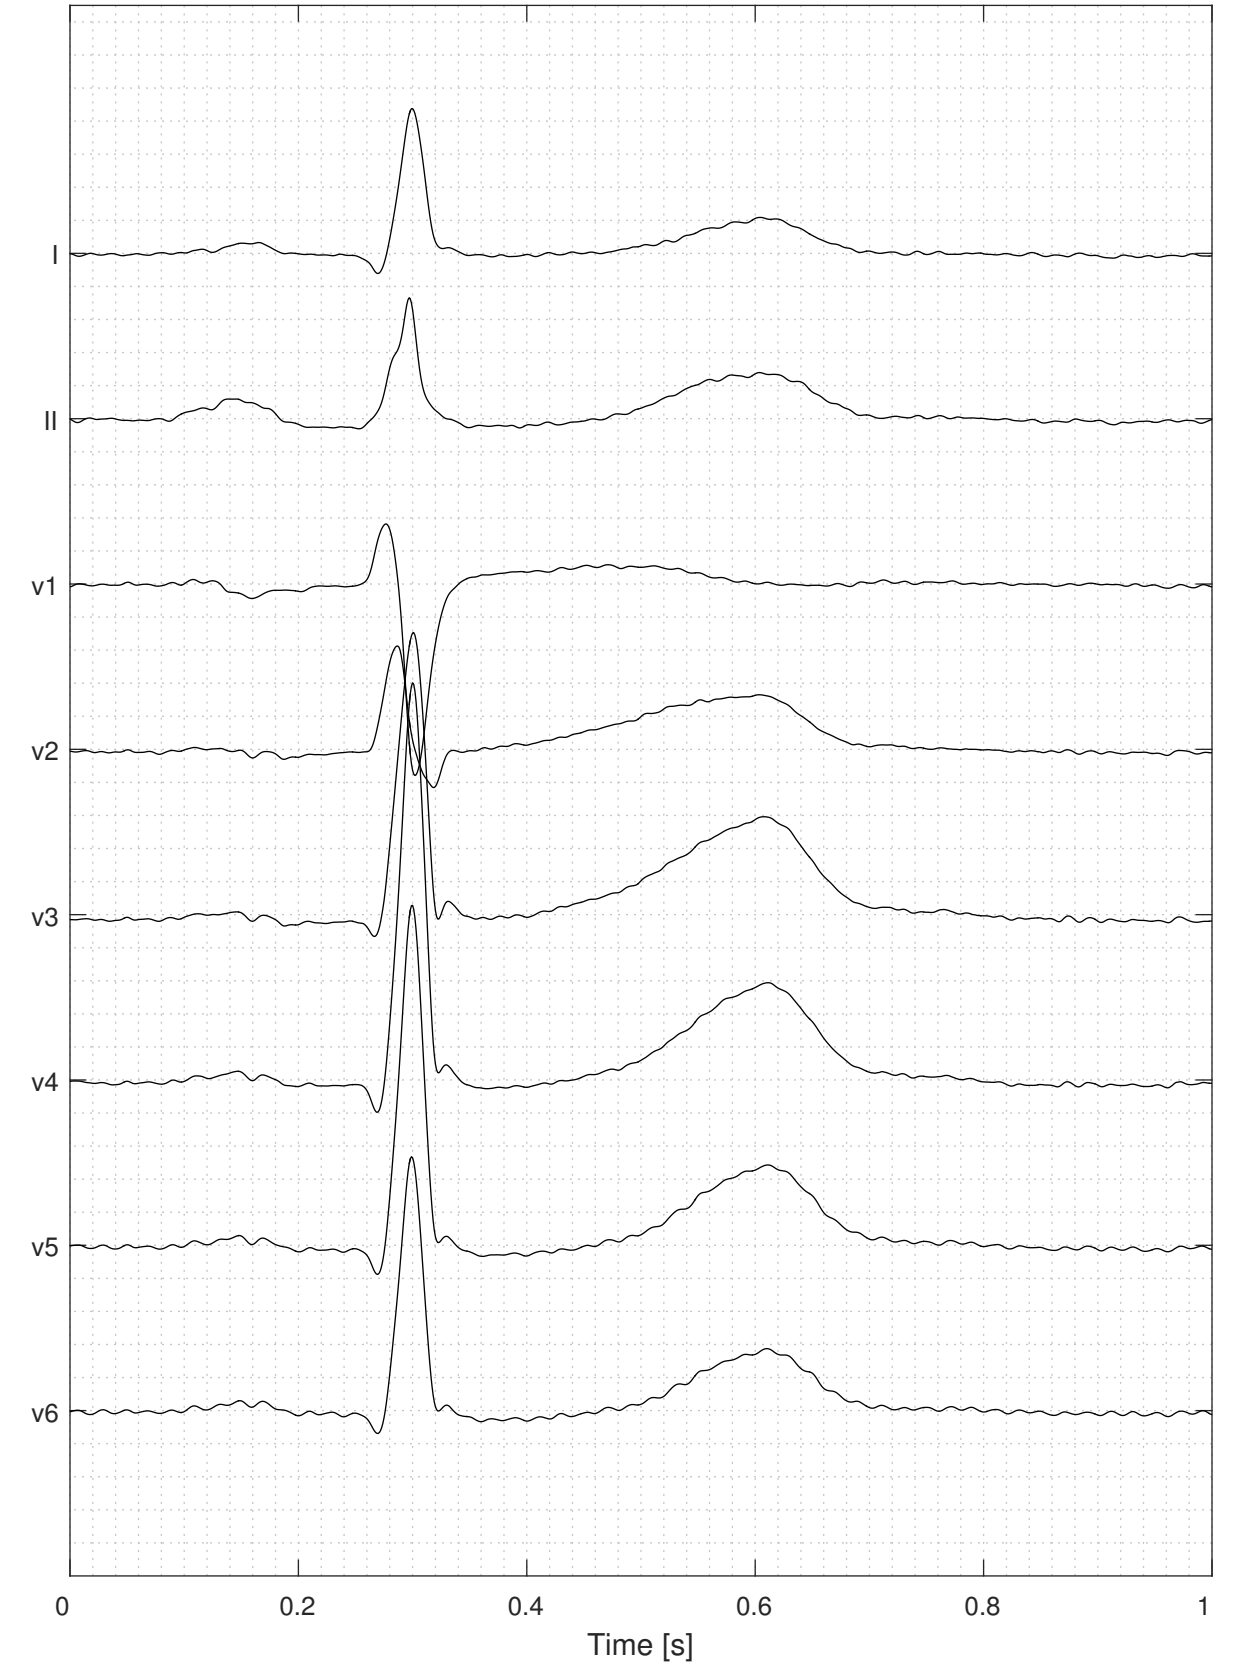

Patient 36

Low RR, Complex #: 261

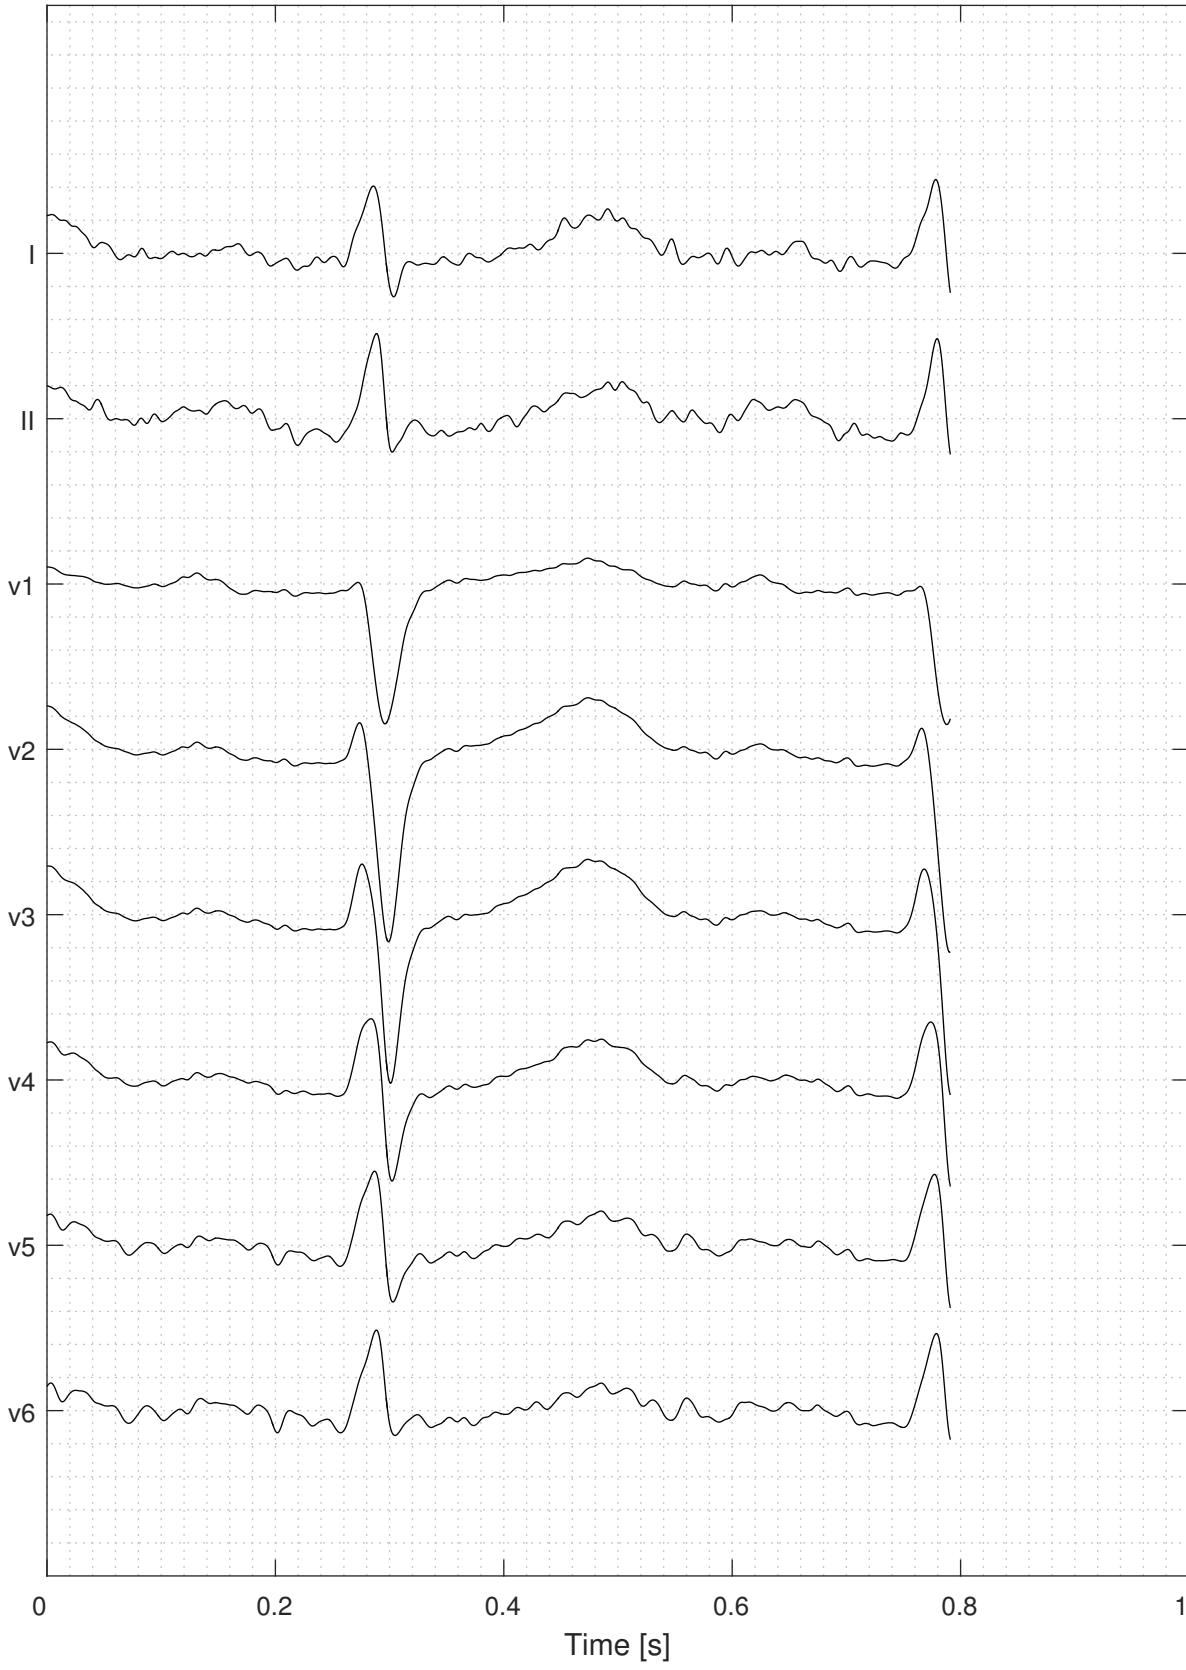

Mid RR, Complex #: 371

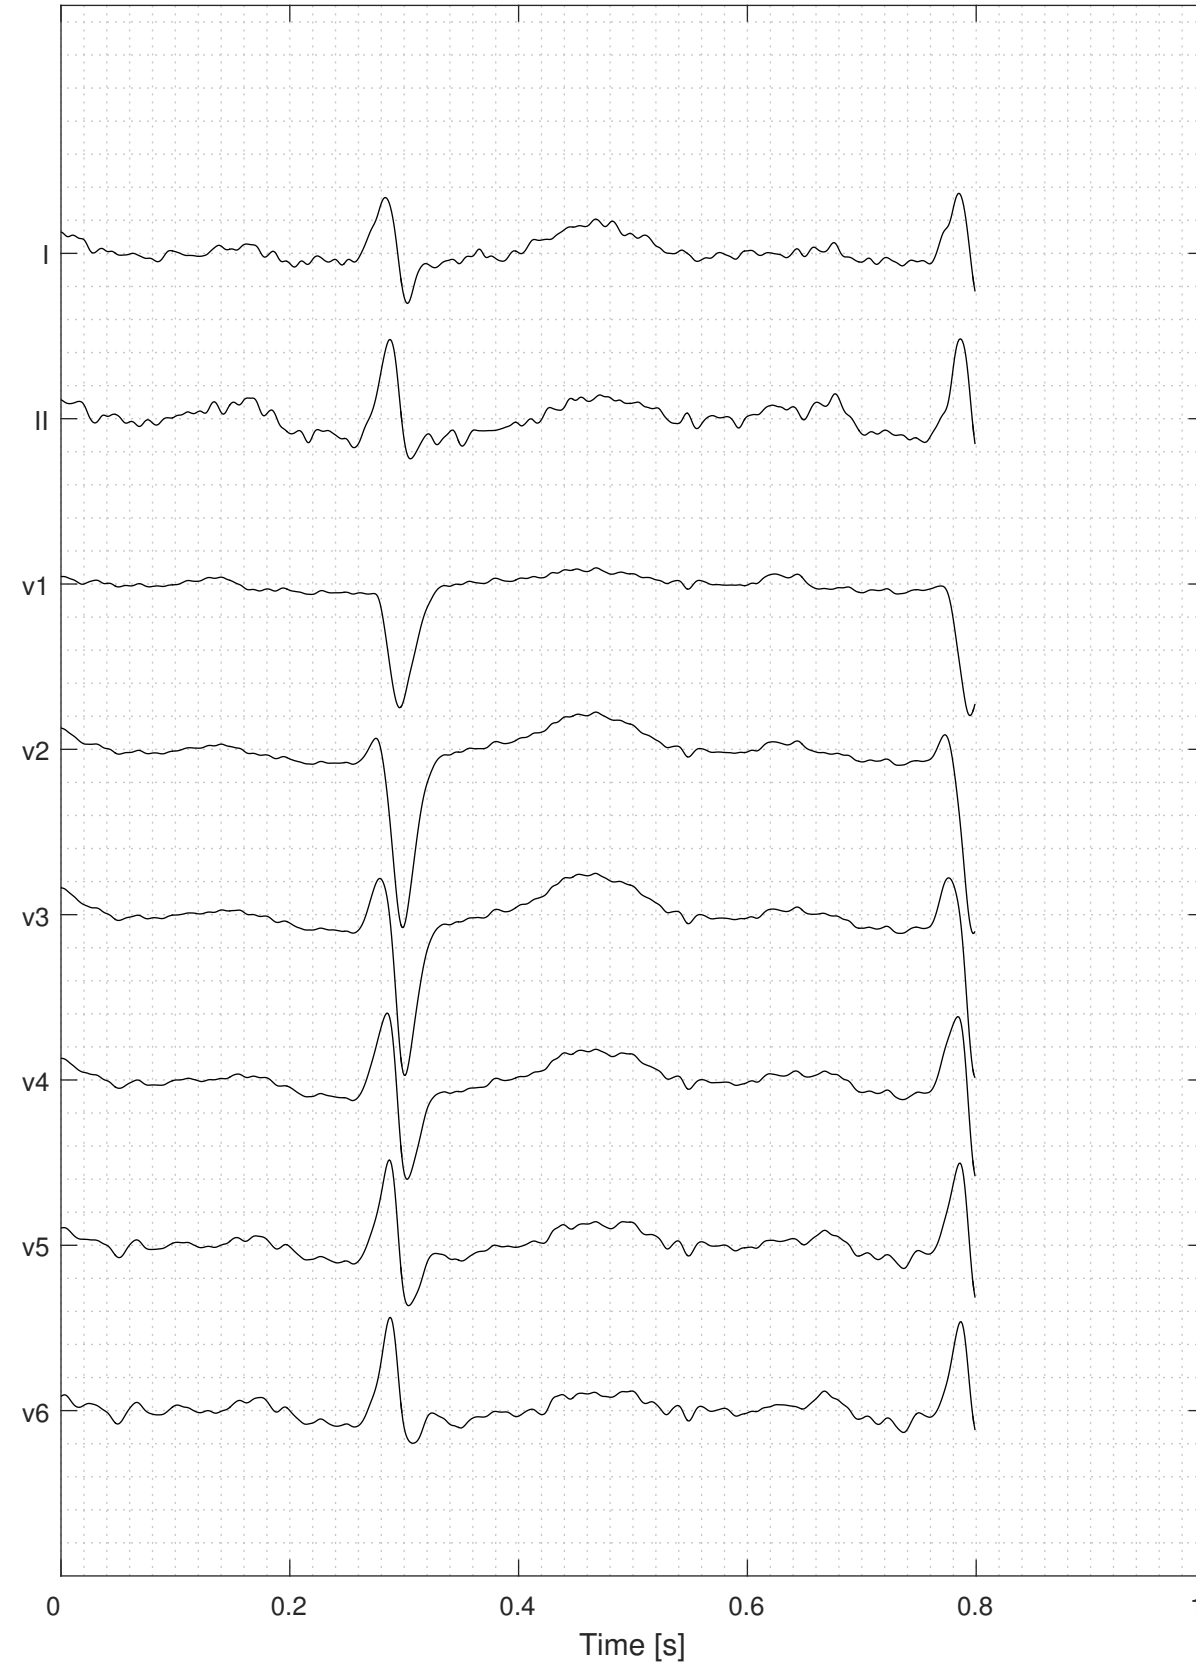

High RR, Complex #: 2

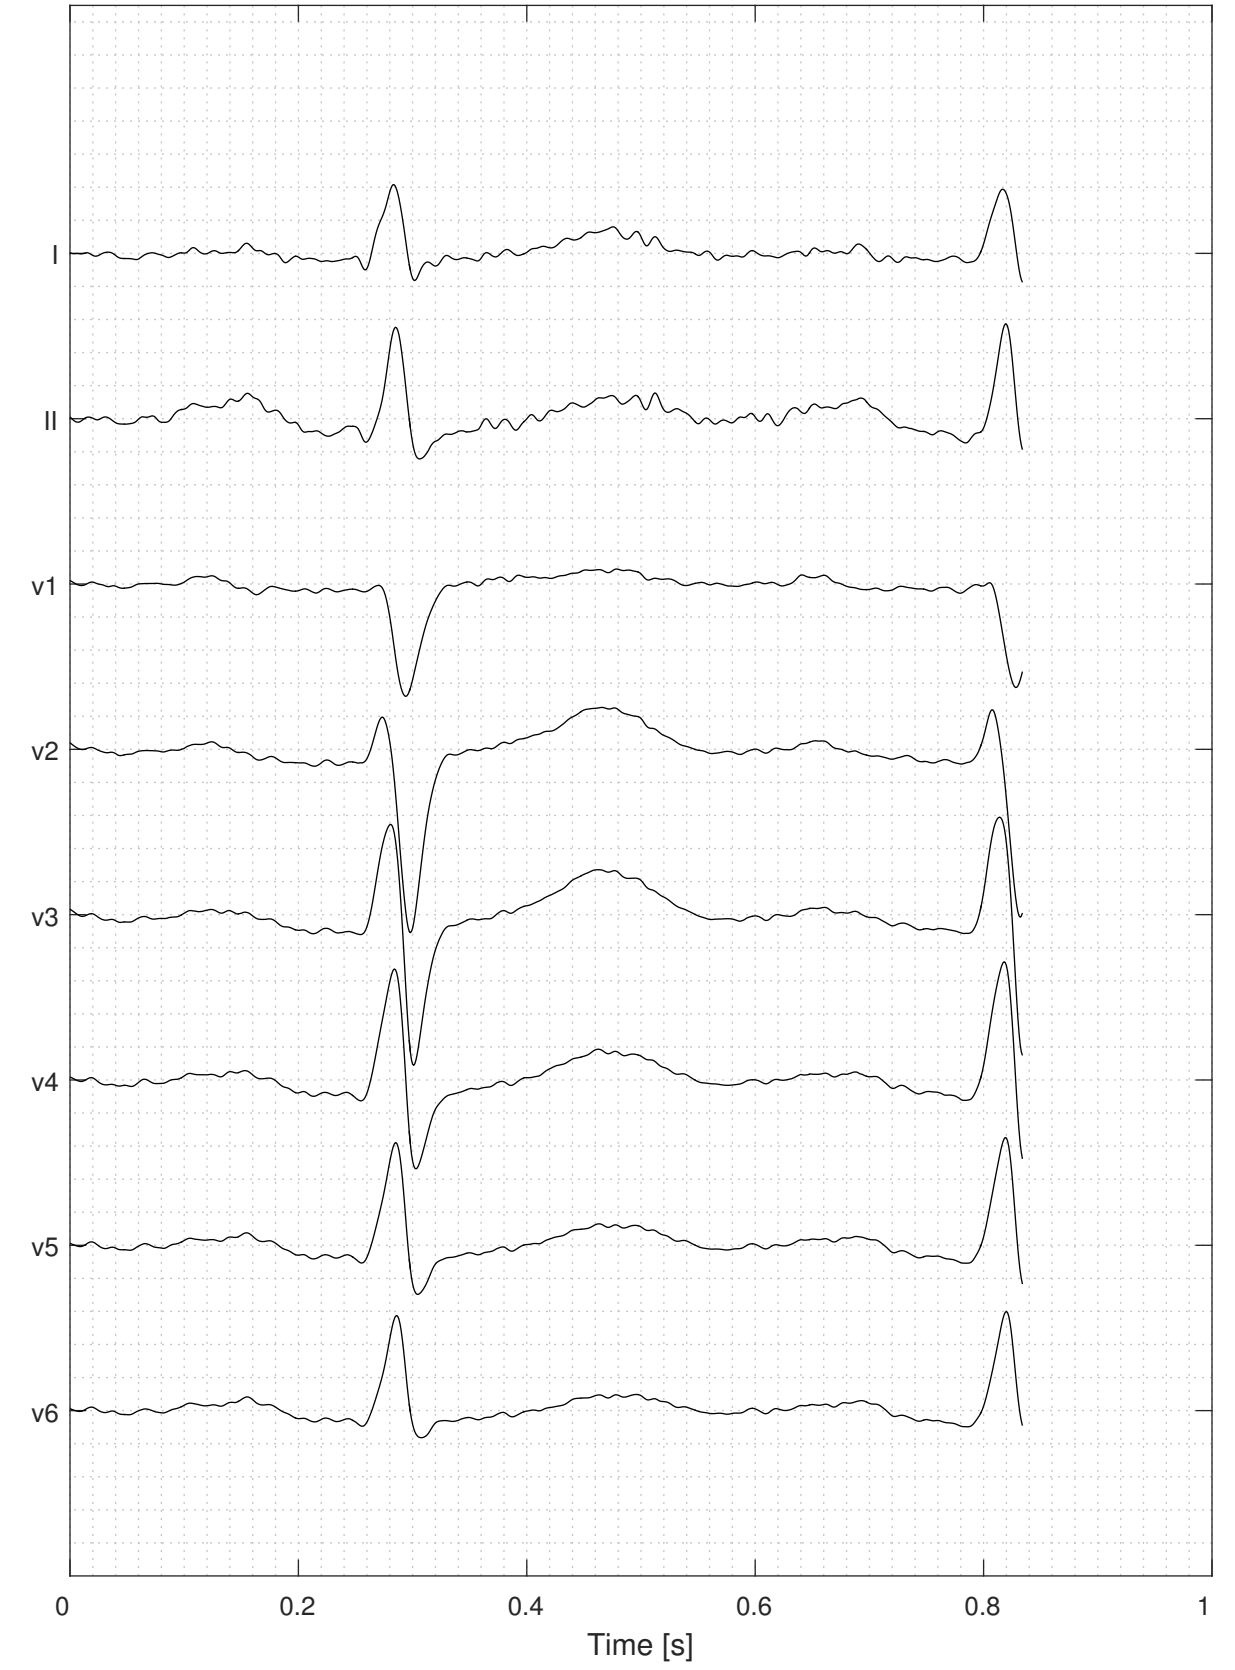

Patient 37

Low RR, Complex #: 320

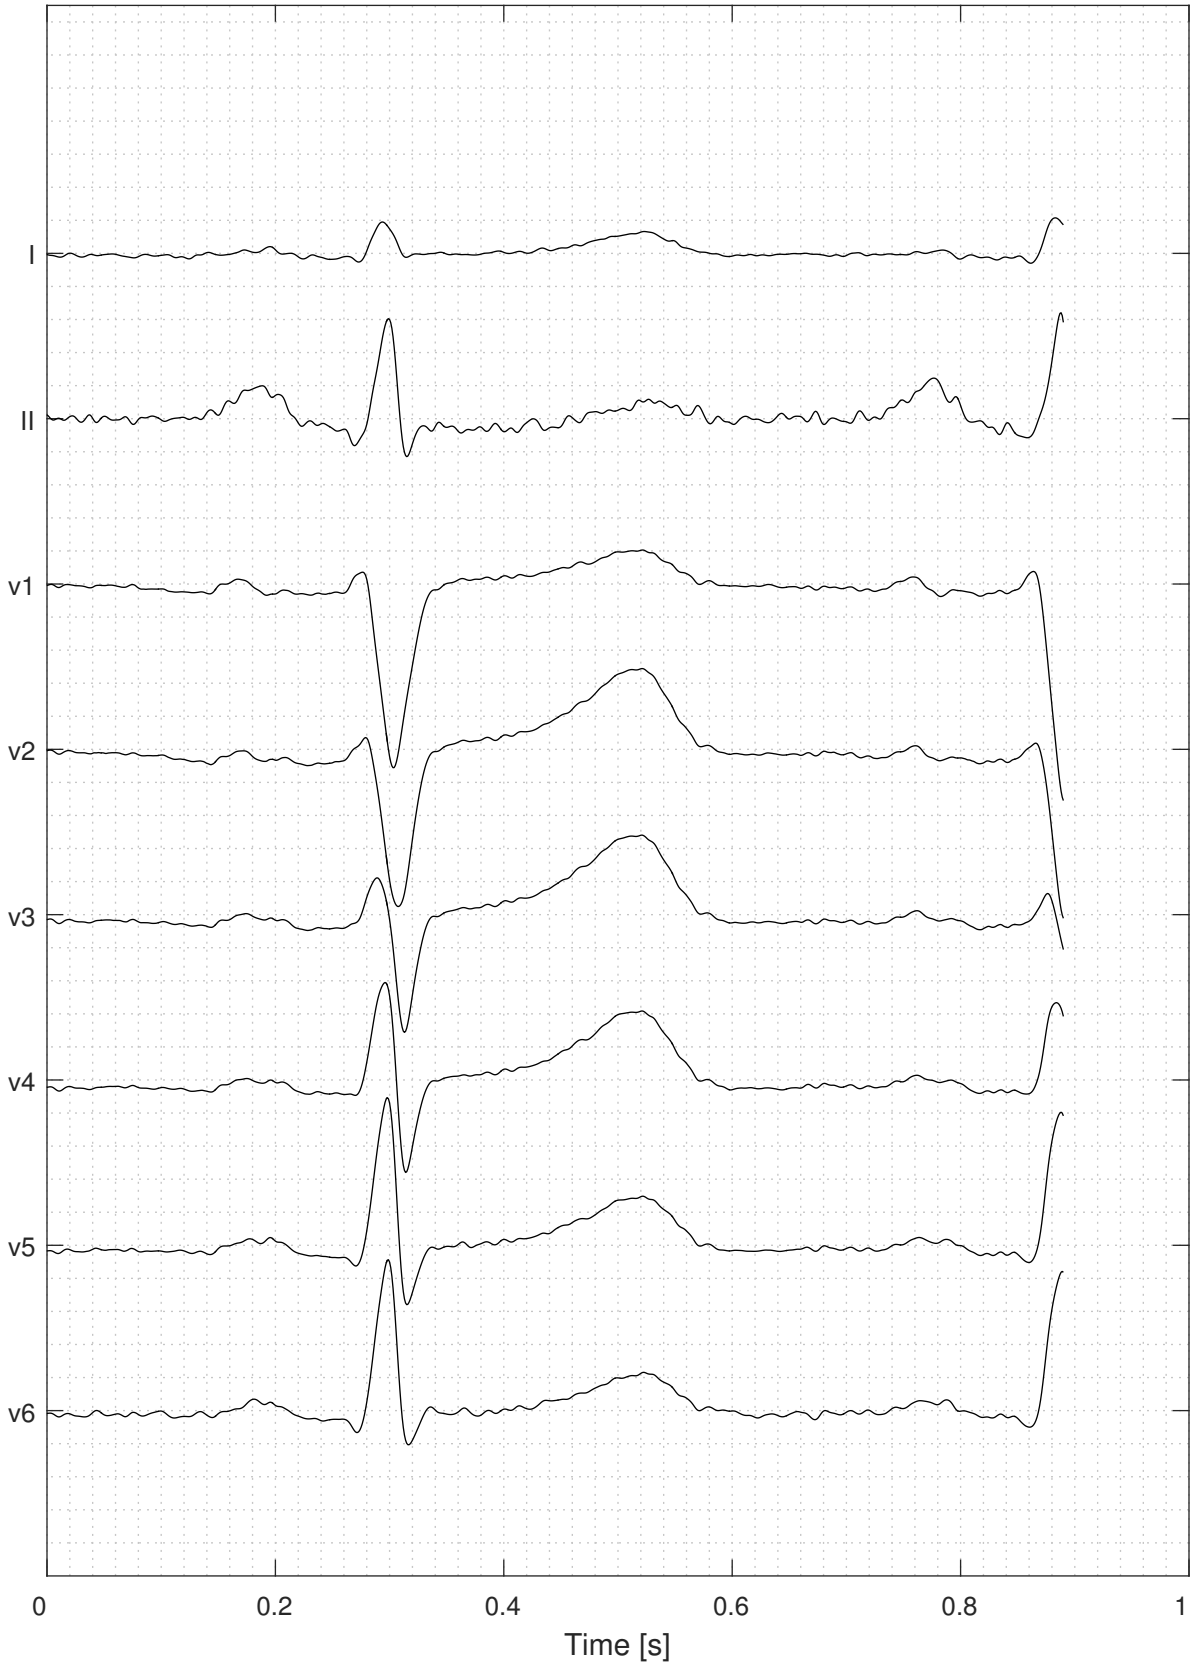

Mid RR, Complex #: 144

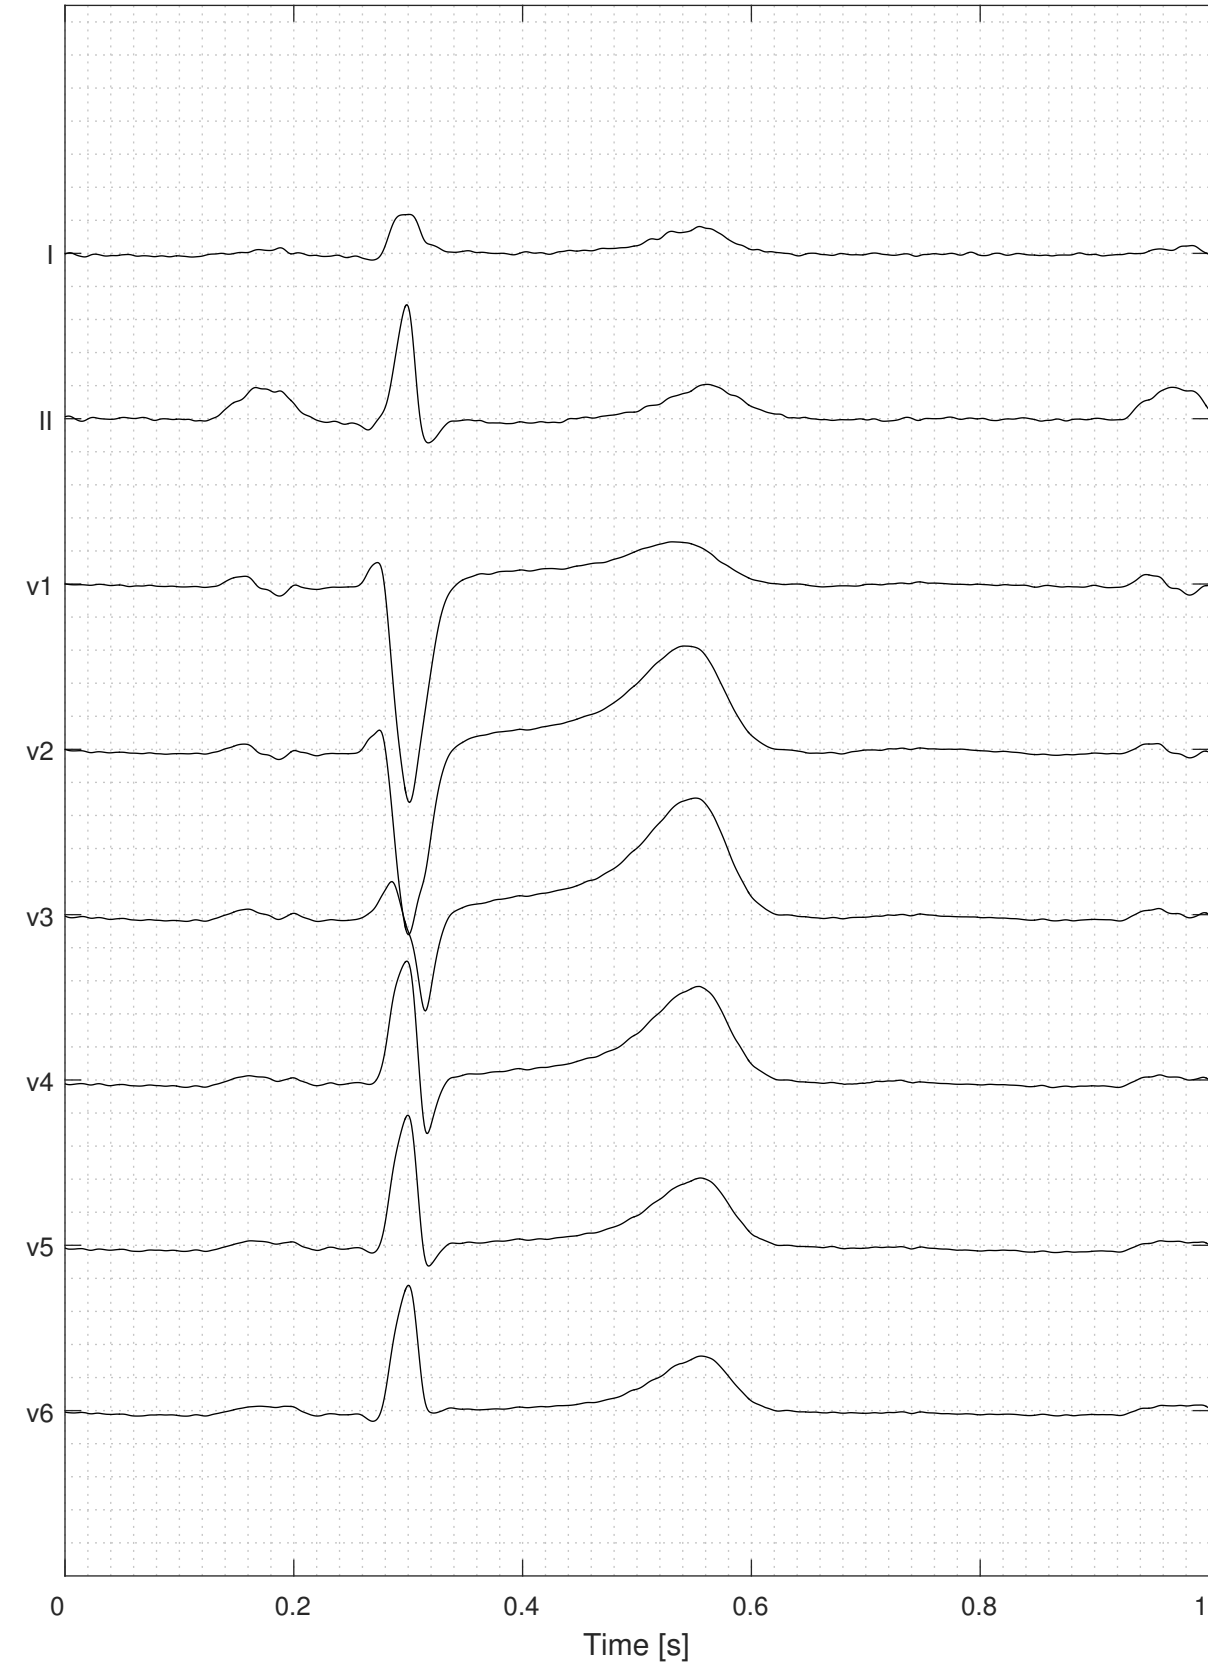

High RR, Complex #: 9

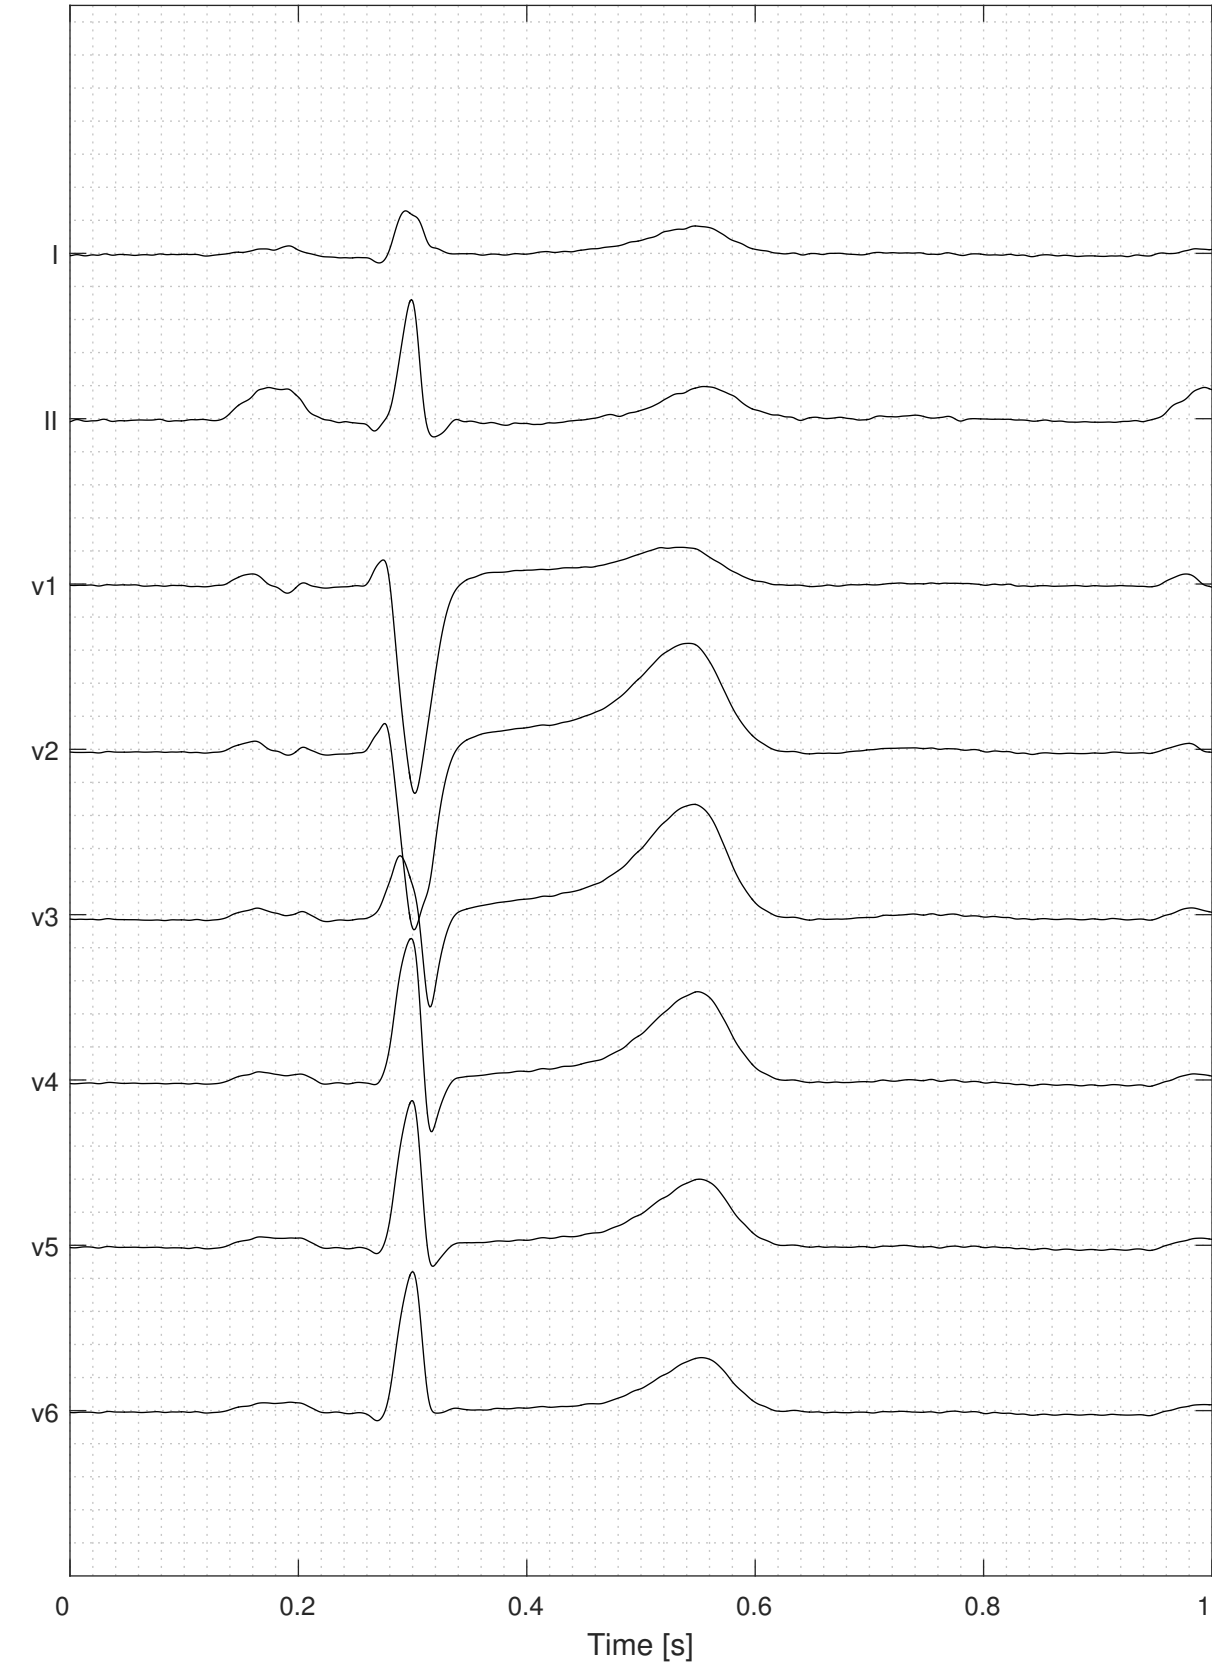

Patient 38

Low RR, Complex #: 241

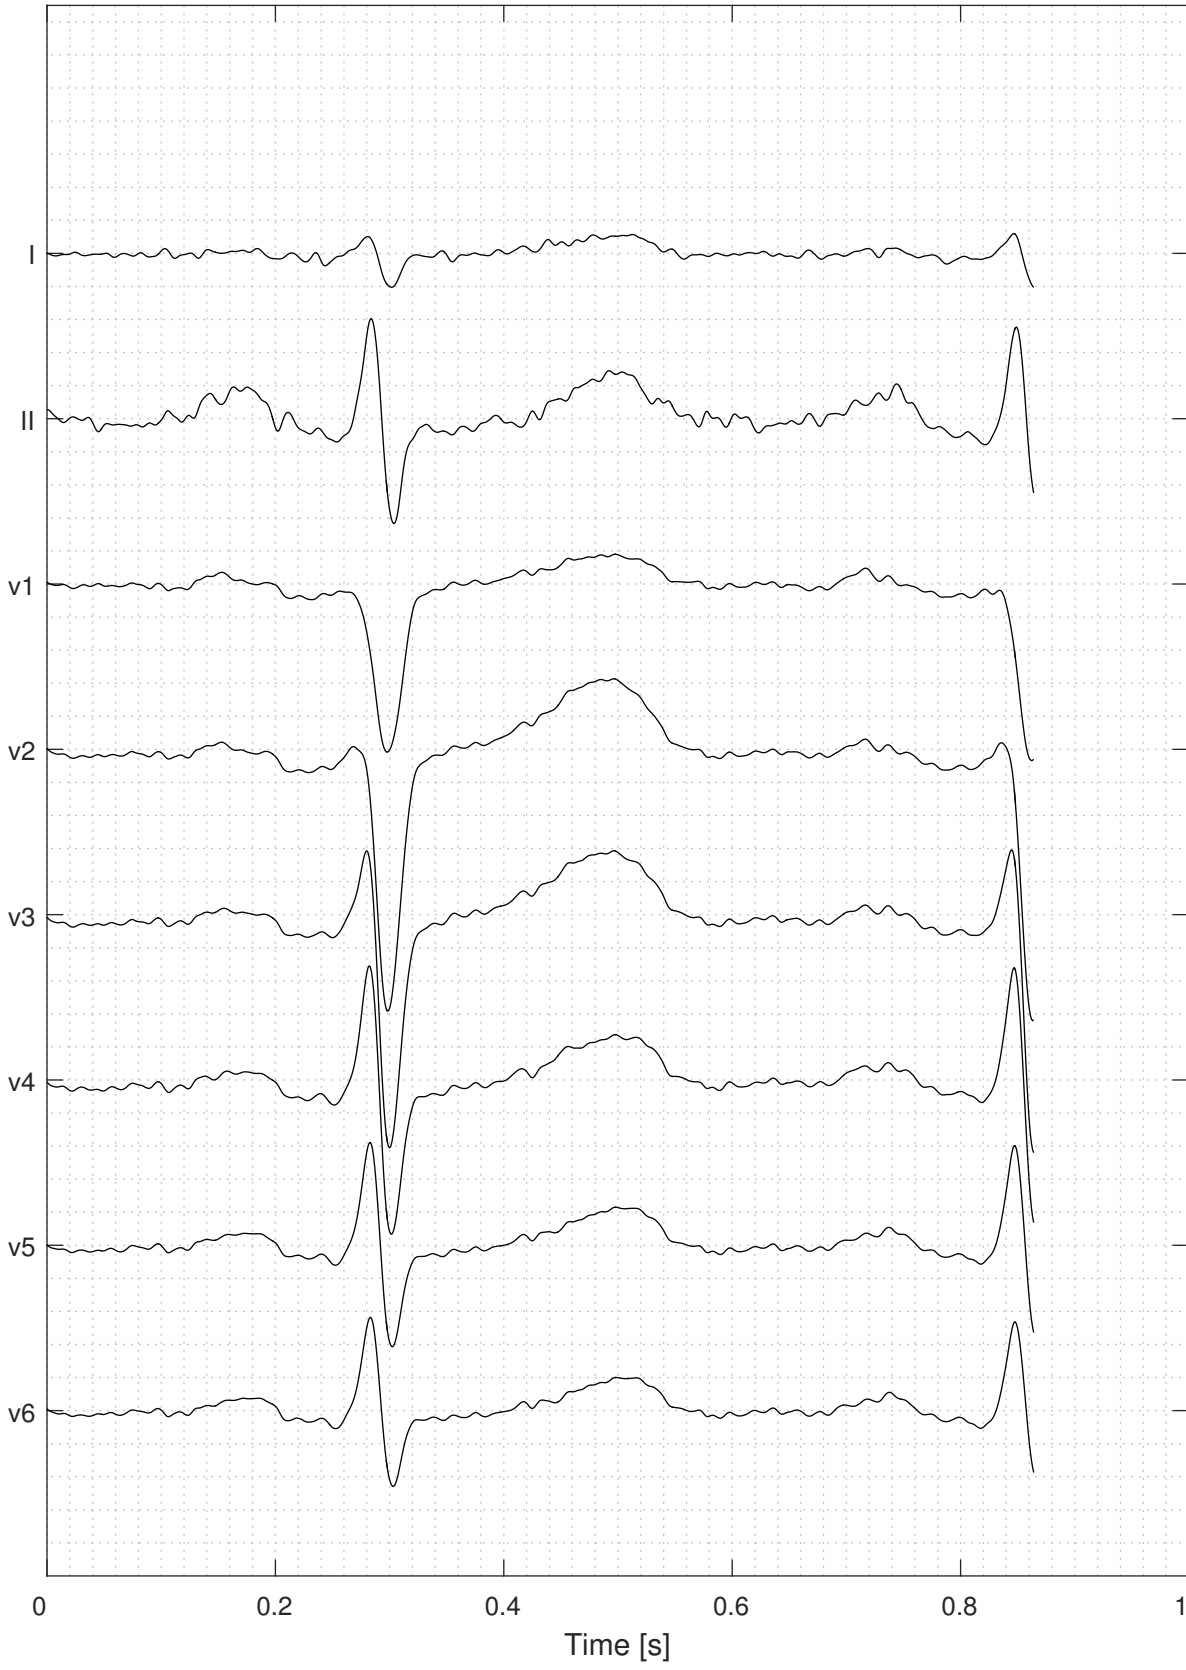

Mid RR, Complex #: 293

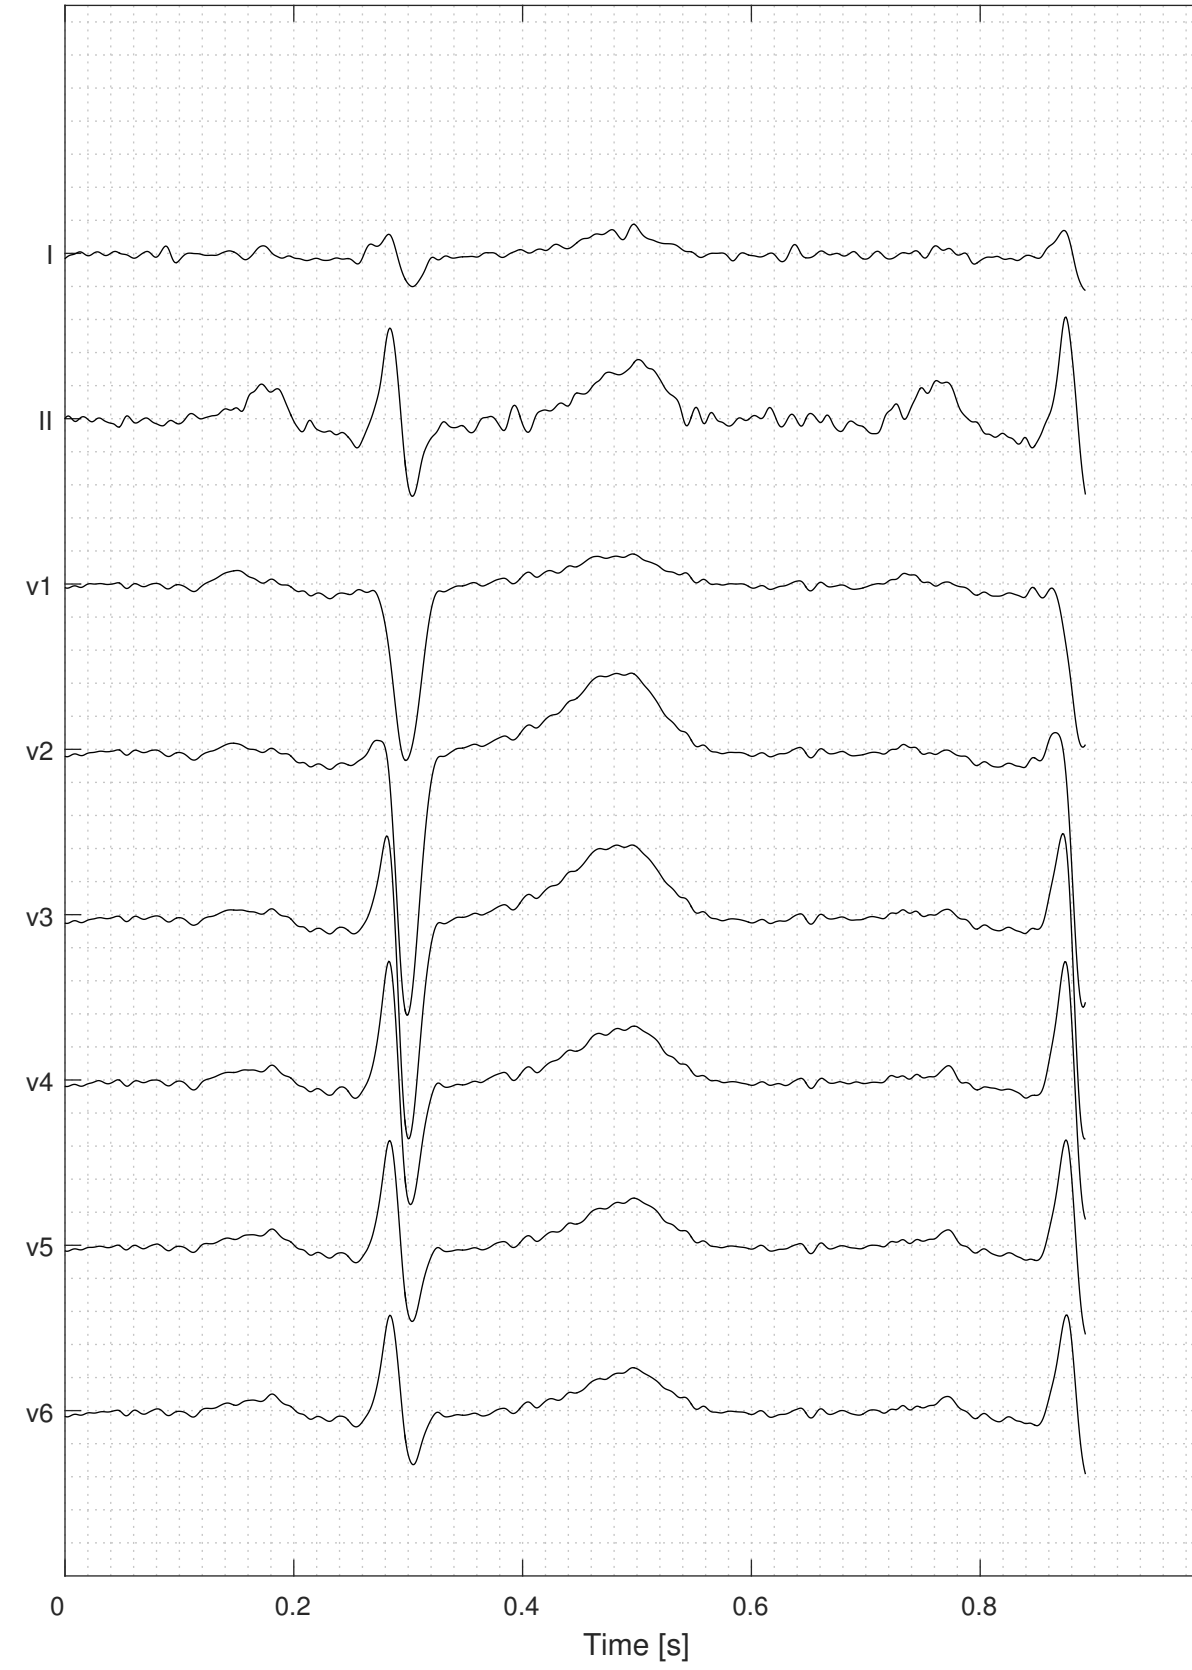

High RR, Complex #: 12

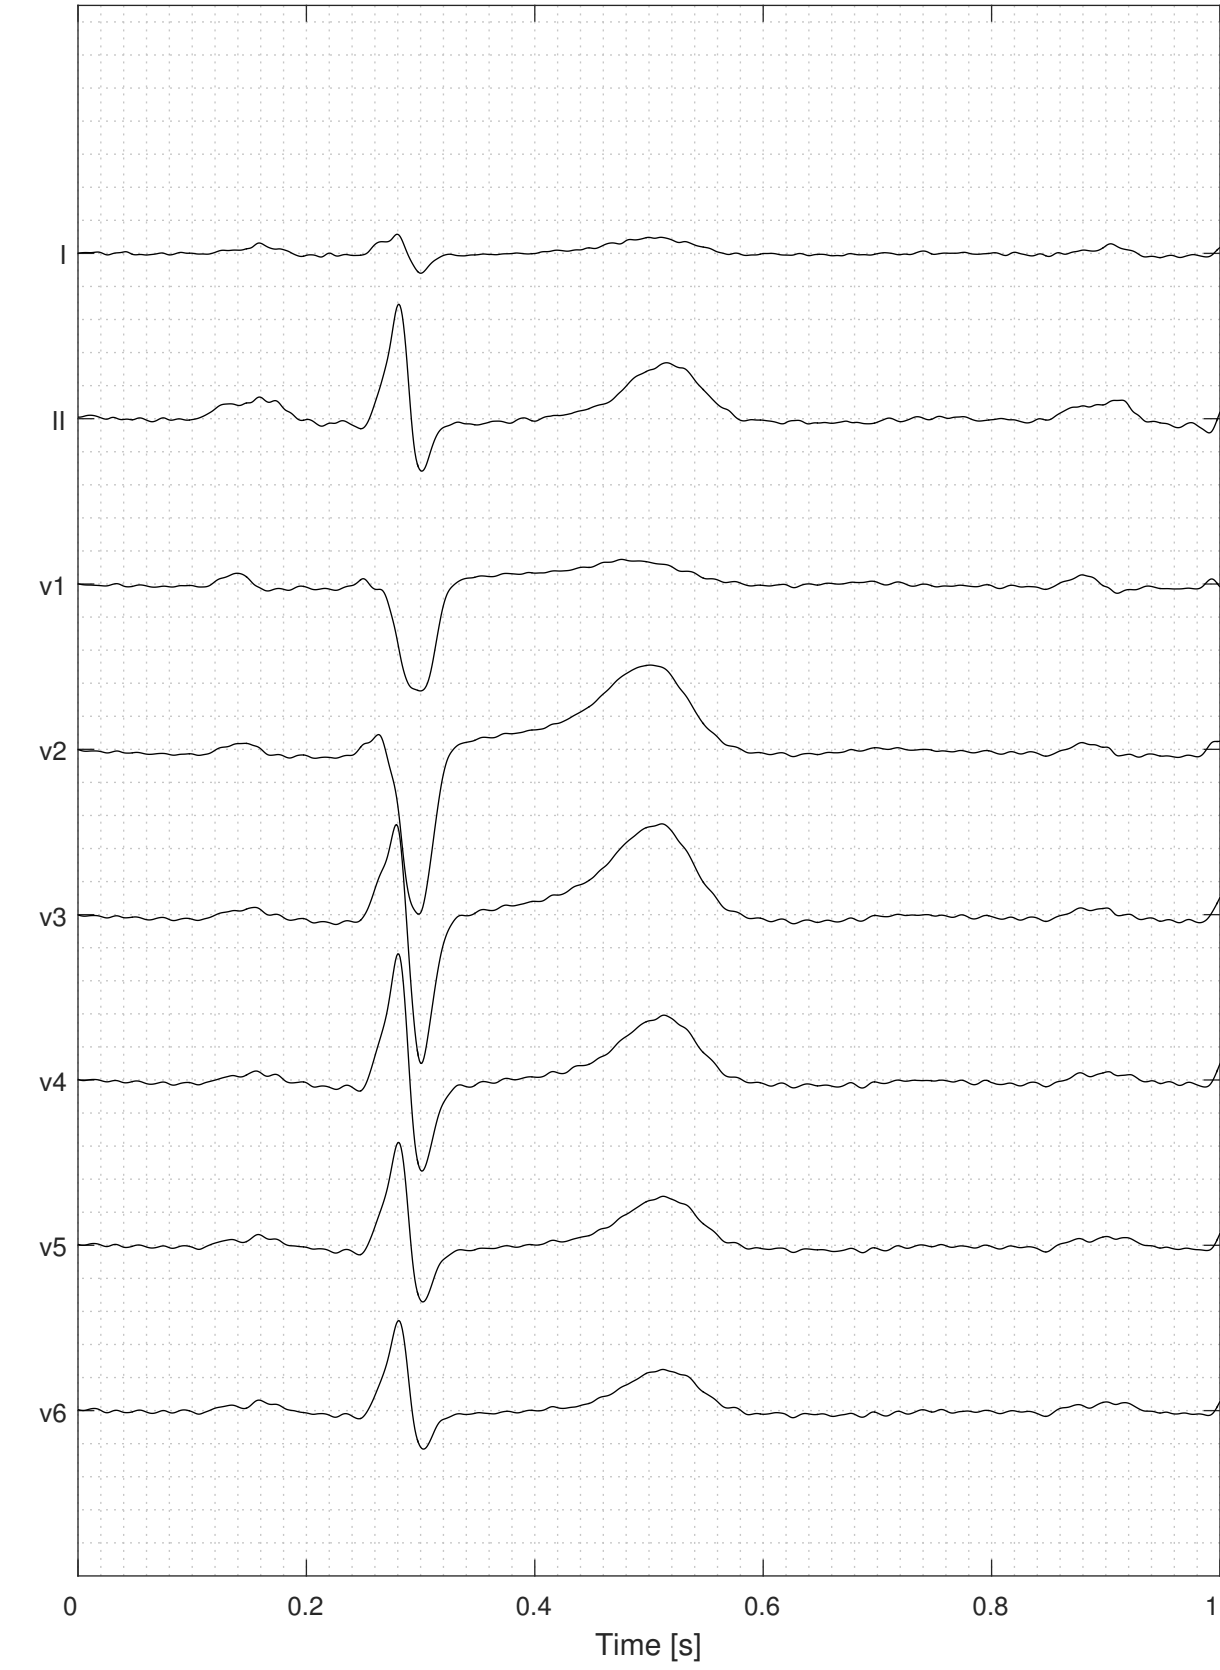

Patient 39

Low RR, Complex #: 374

Mid RR, Complex #: 122

High RR, Complex #: 54

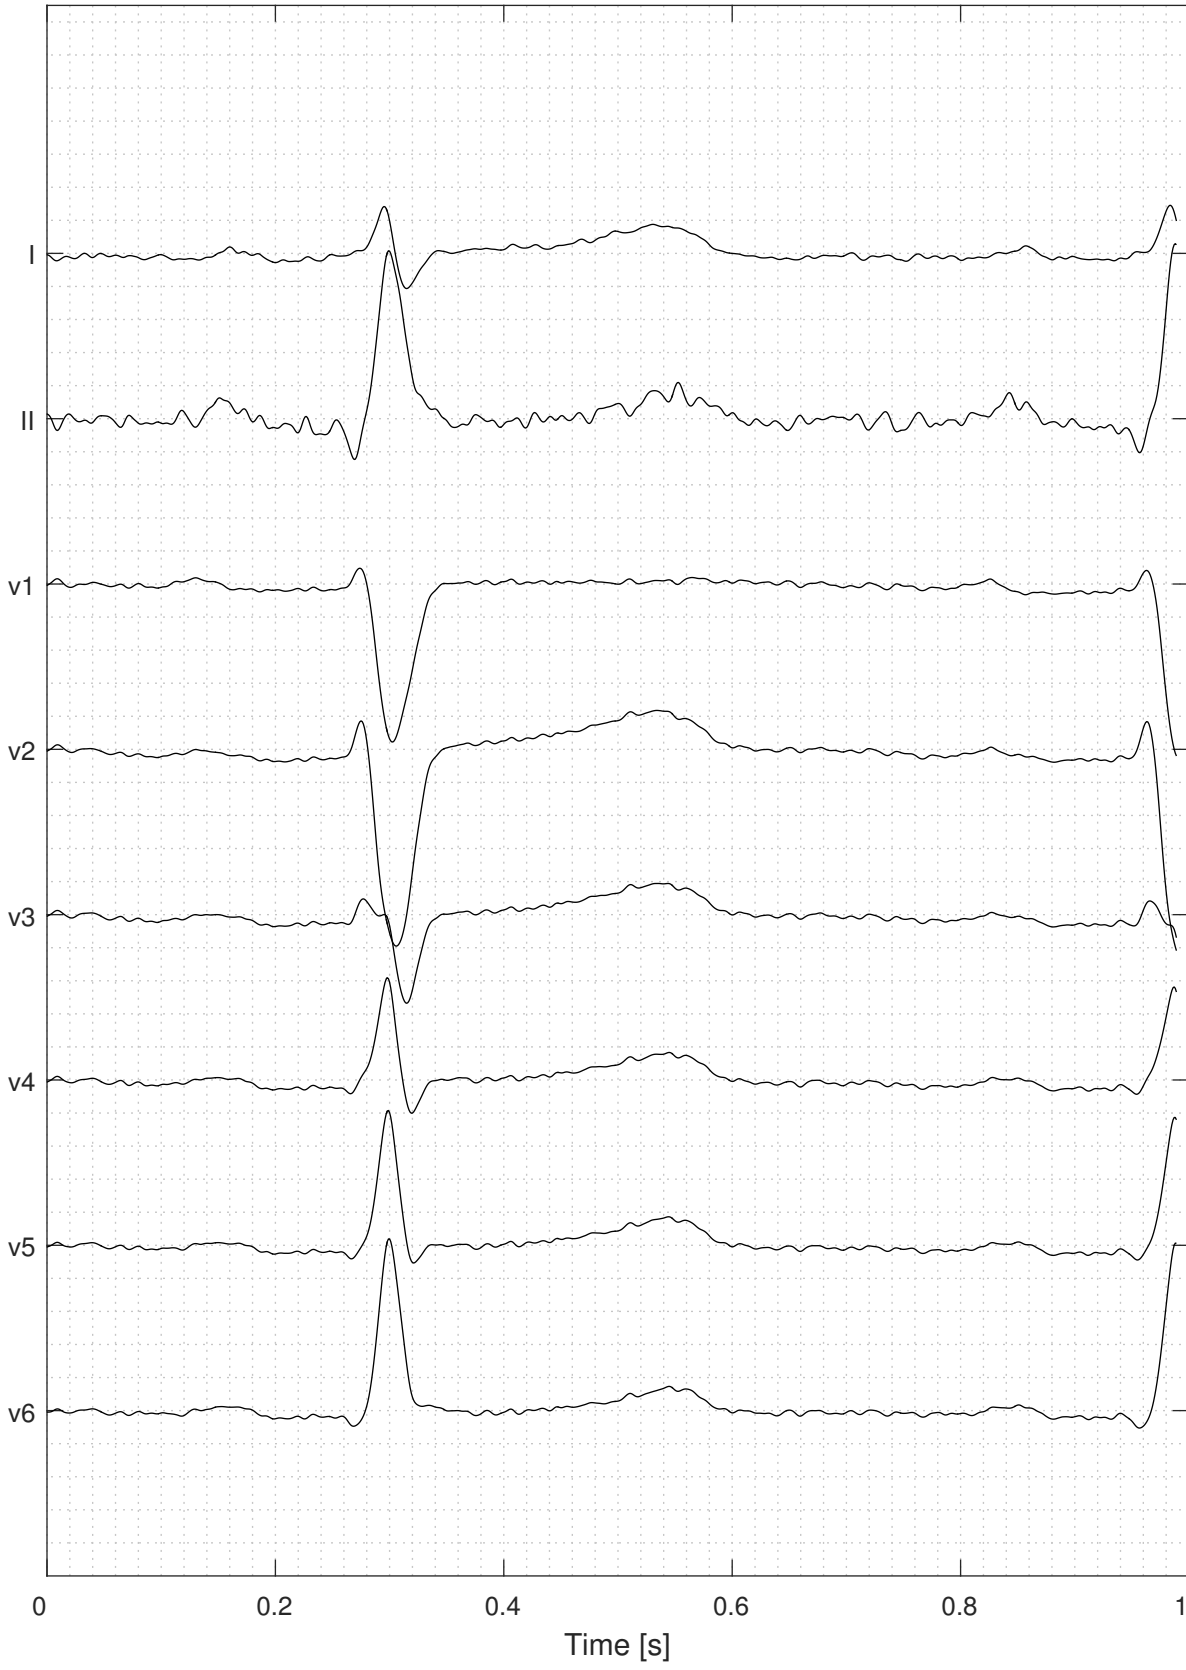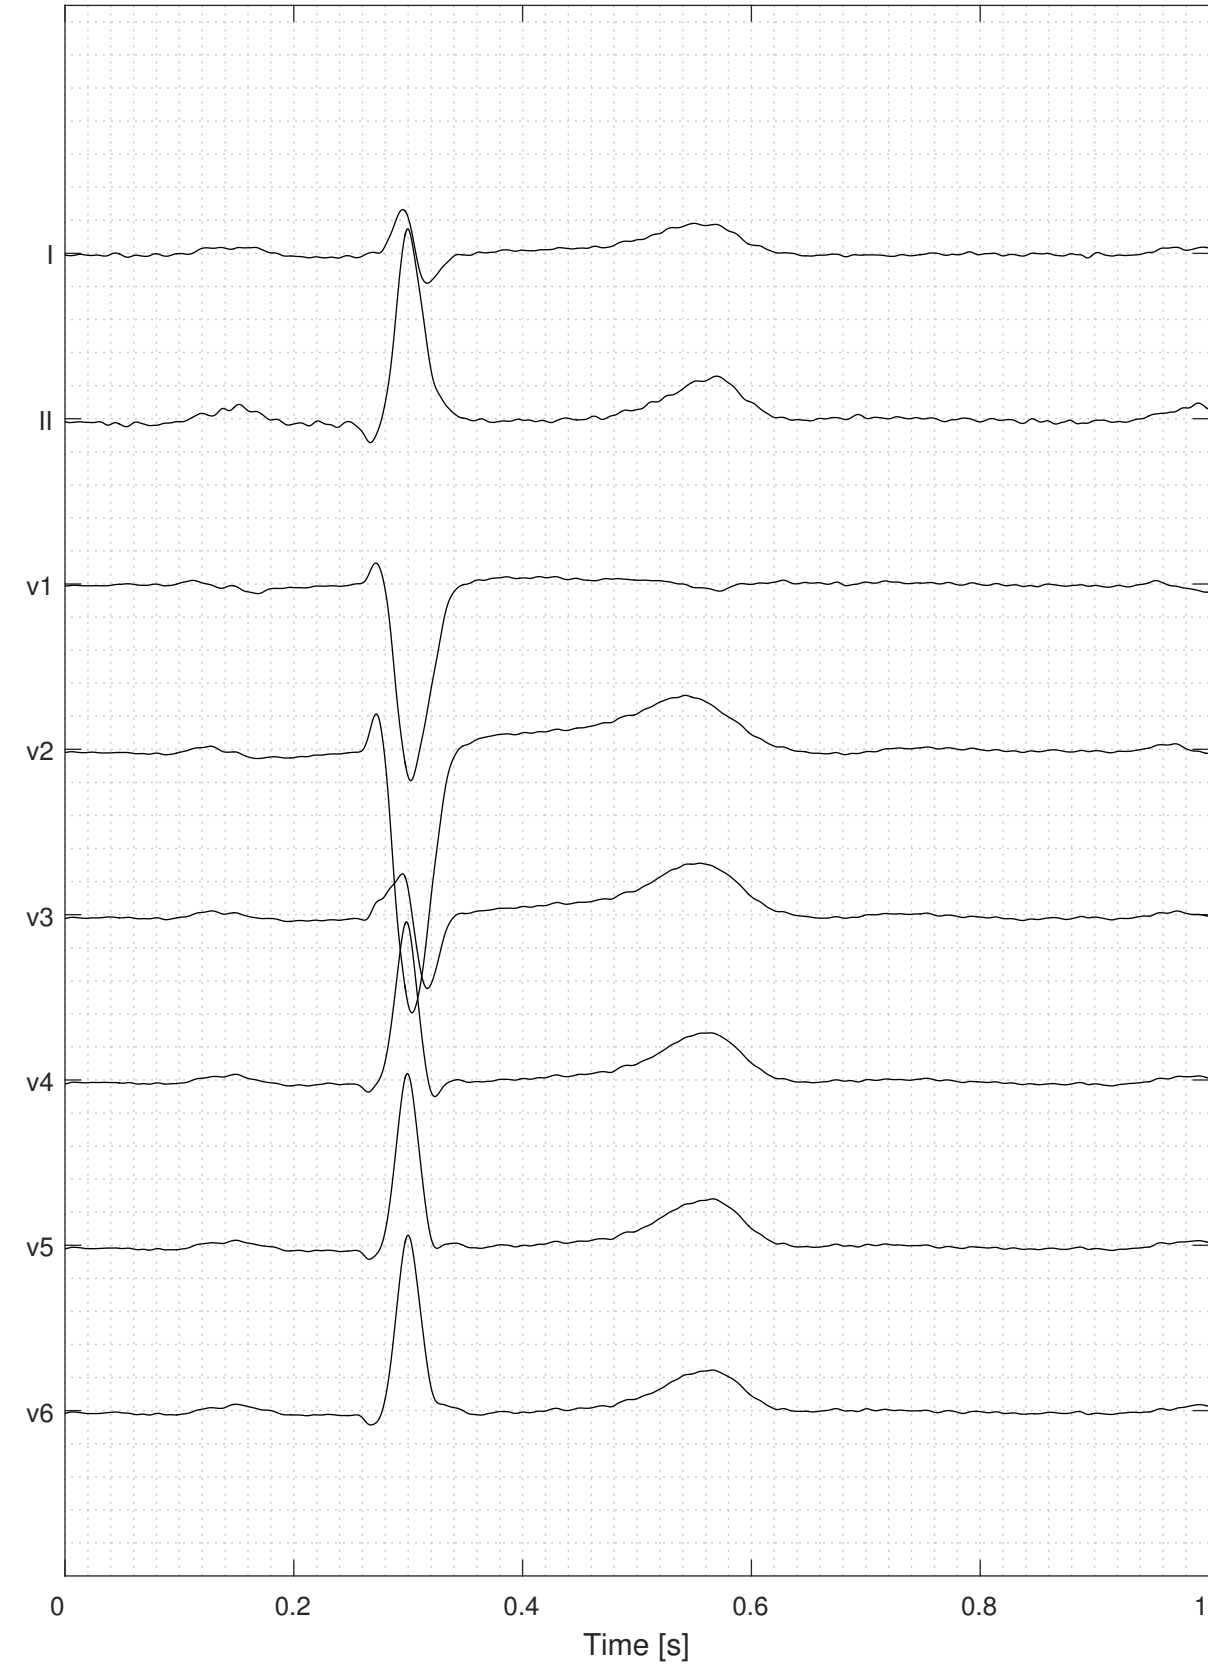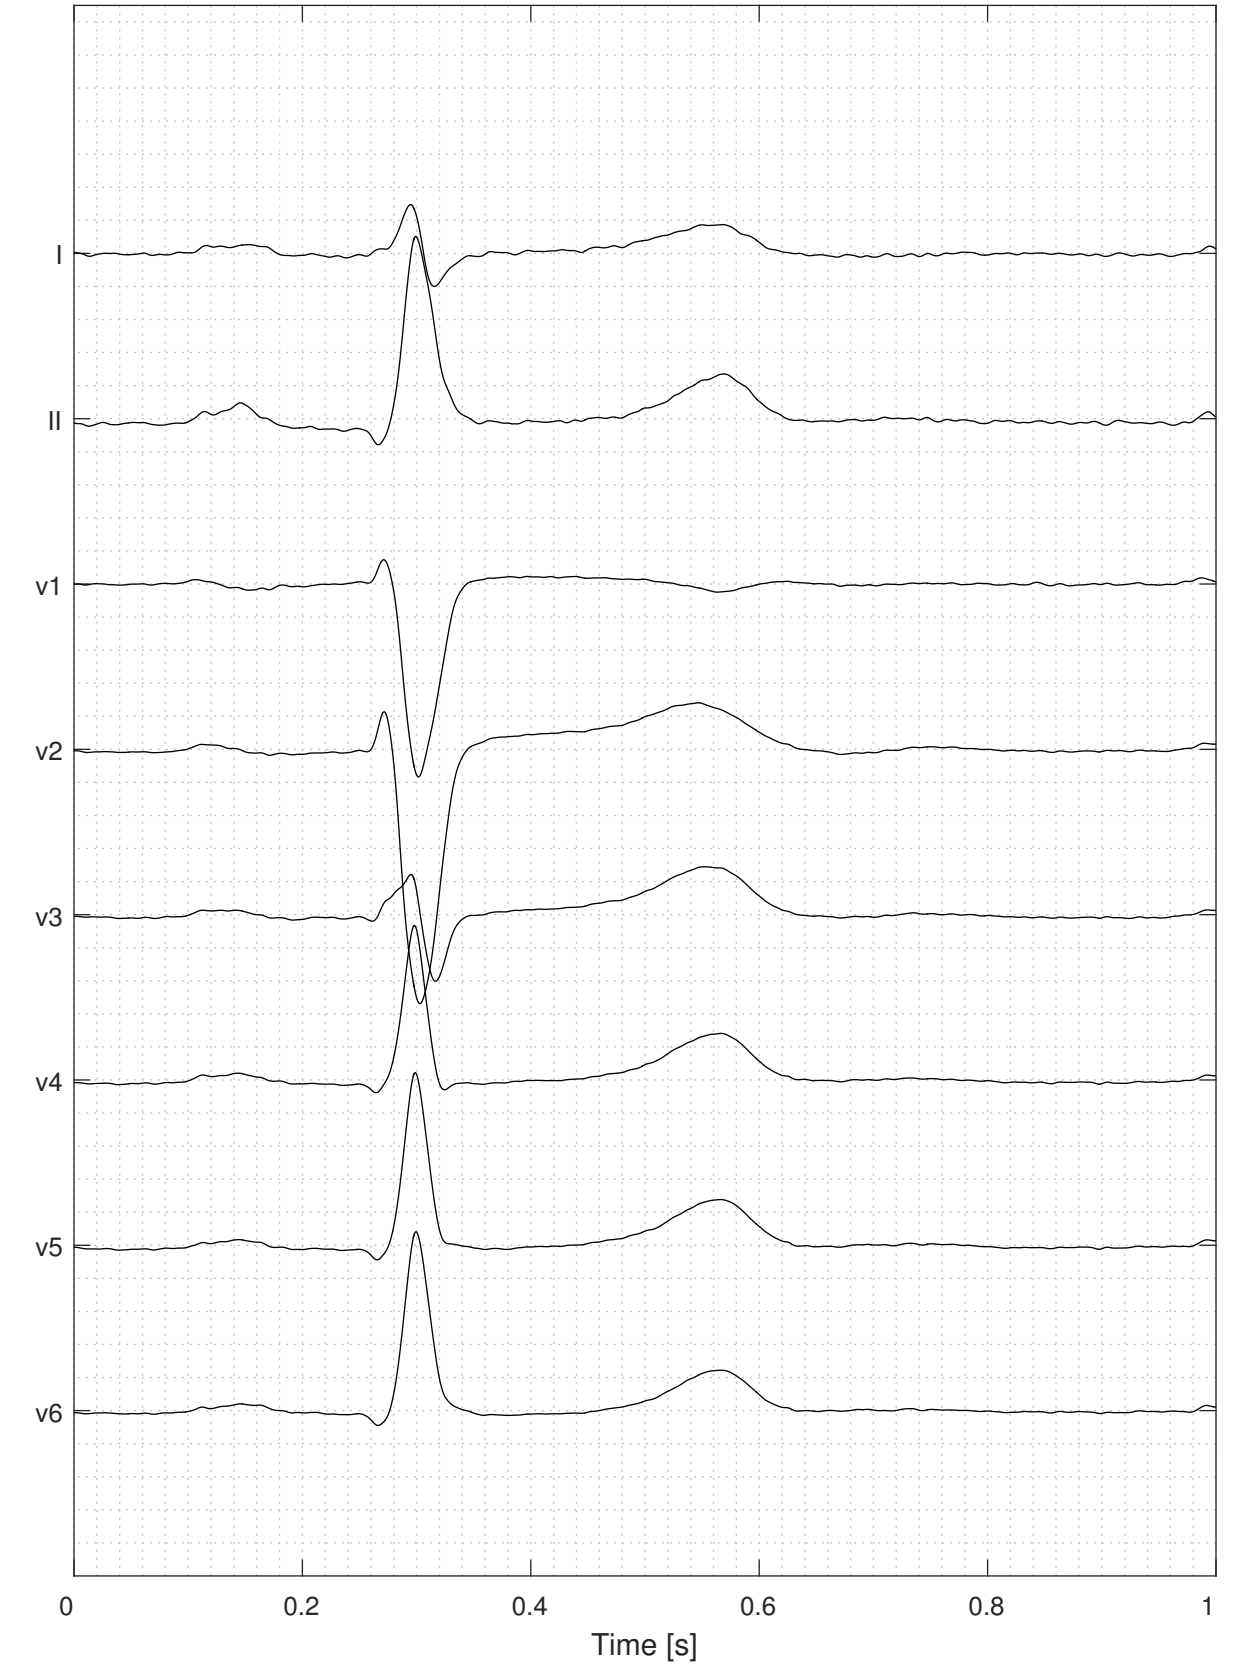

Patient 40

Low RR, Complex #: 132

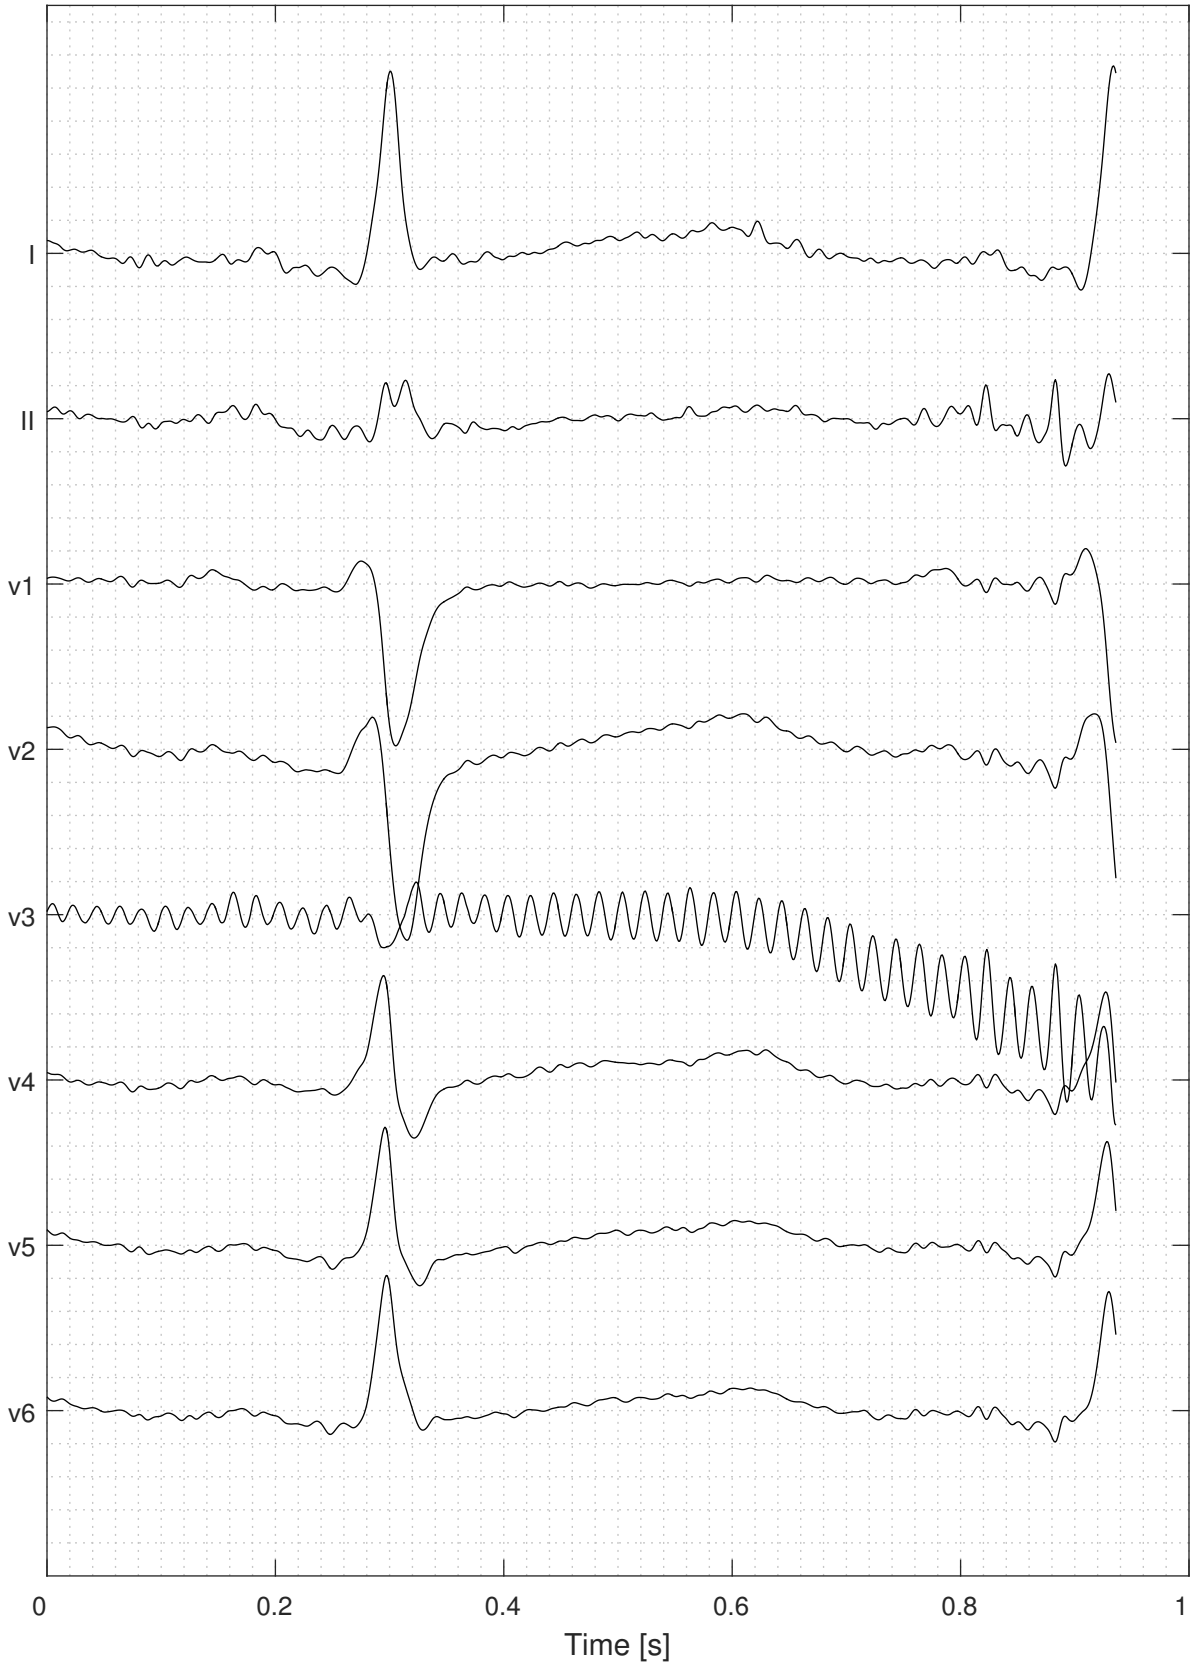

Mid RR, Complex #: 171

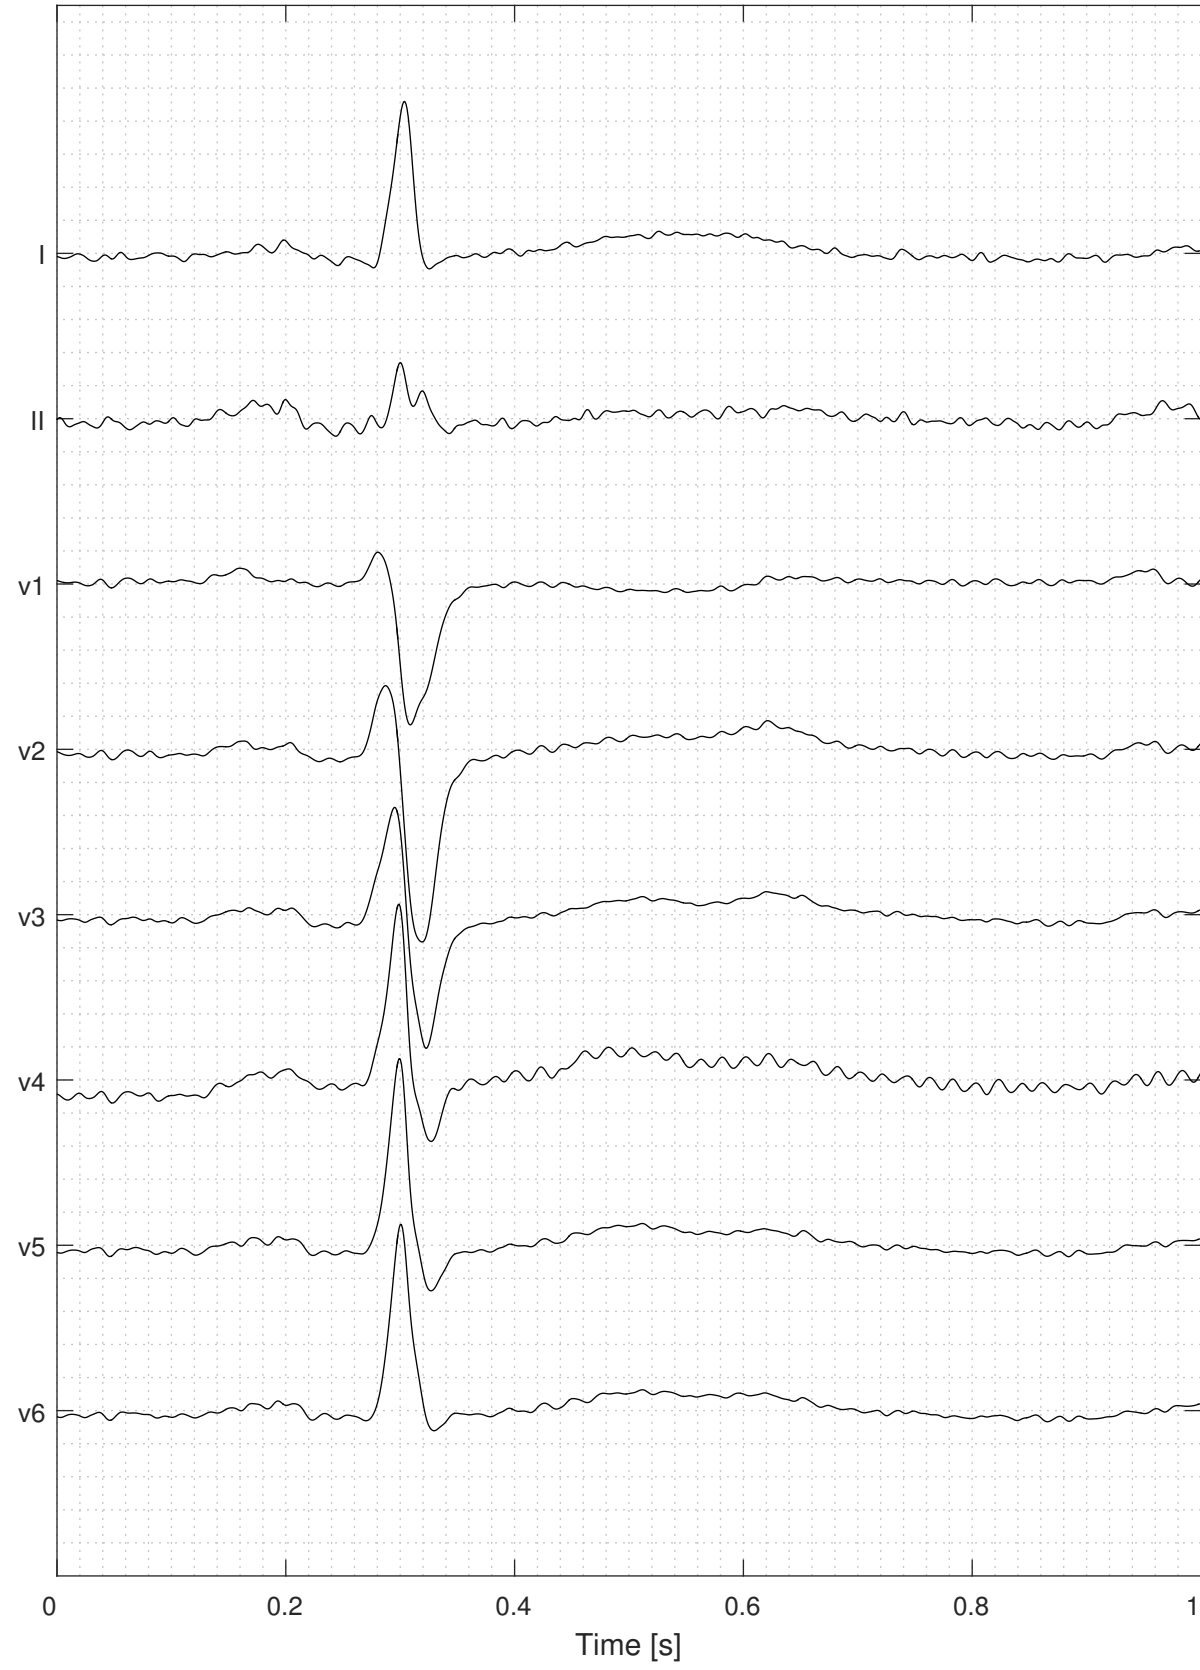

High RR, Complex #: 10

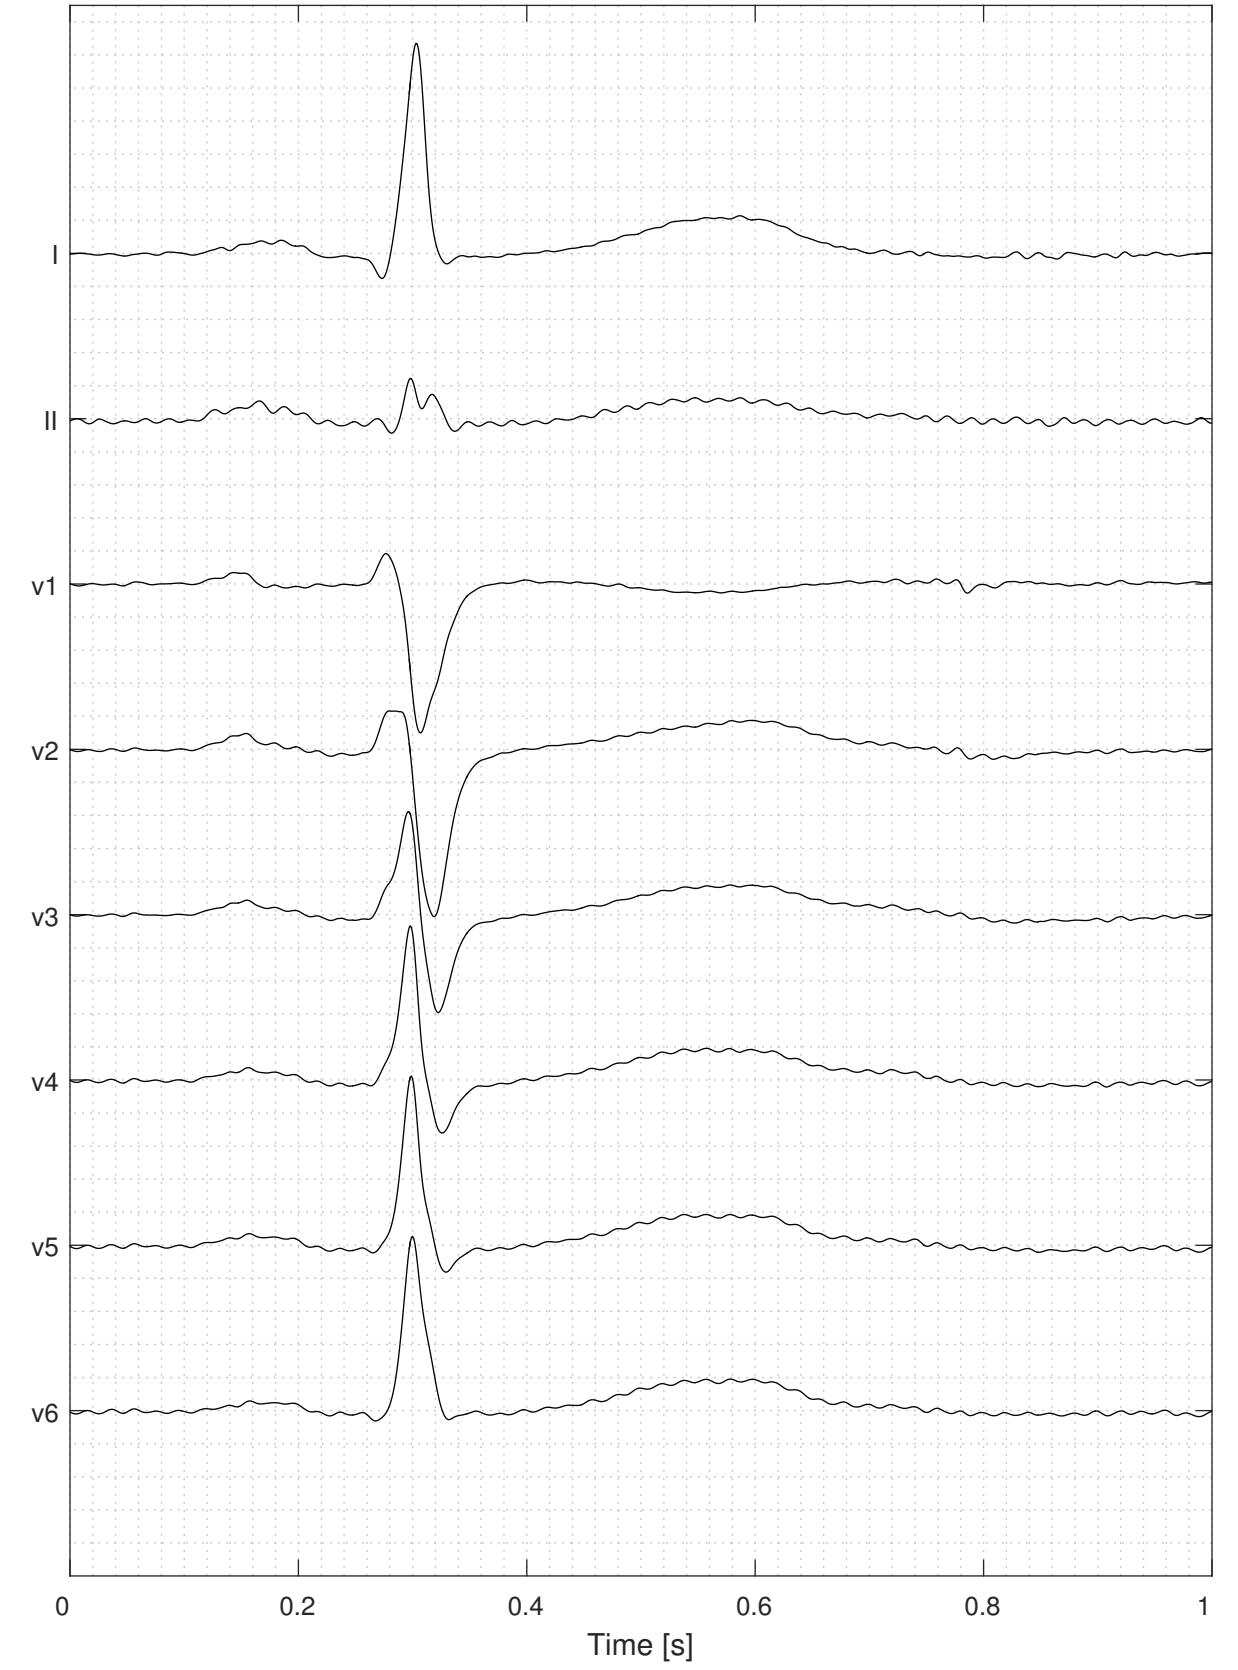



Patient 41

Low RR, Complex #: 194

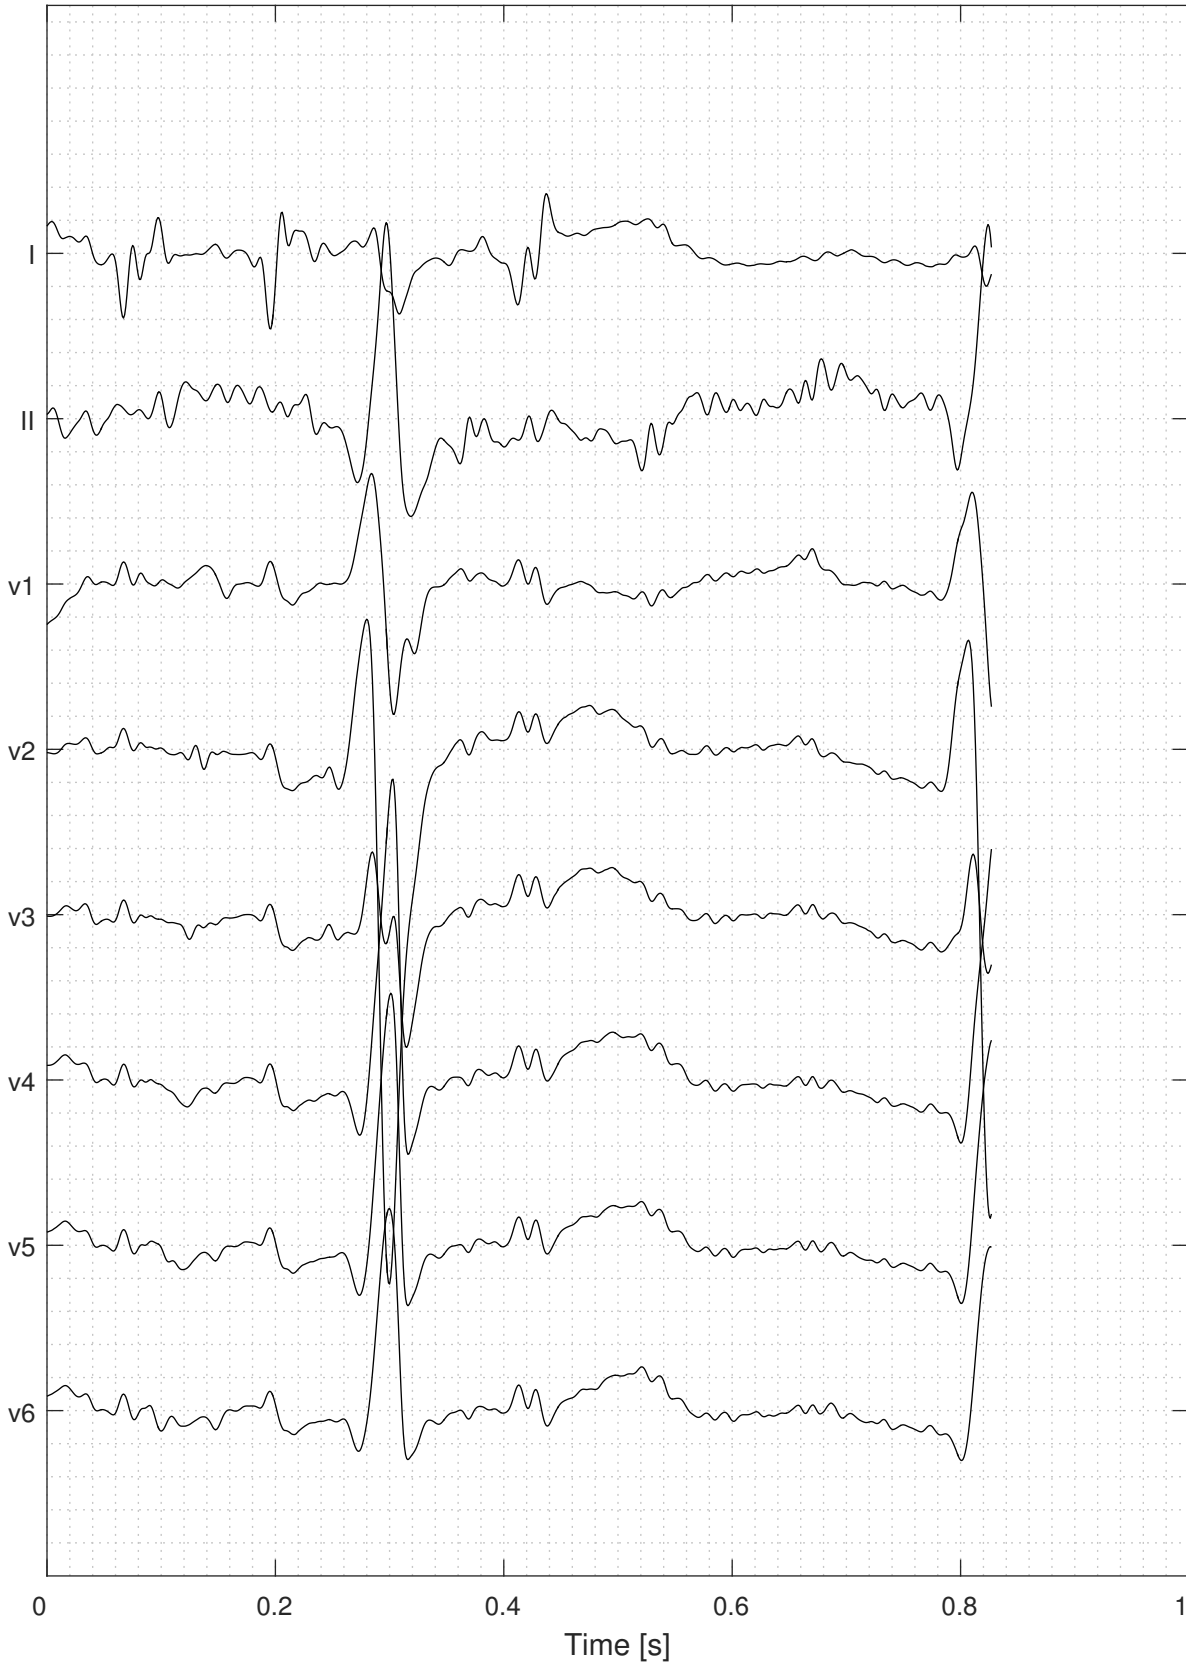

Mid RR, Complex #: 357

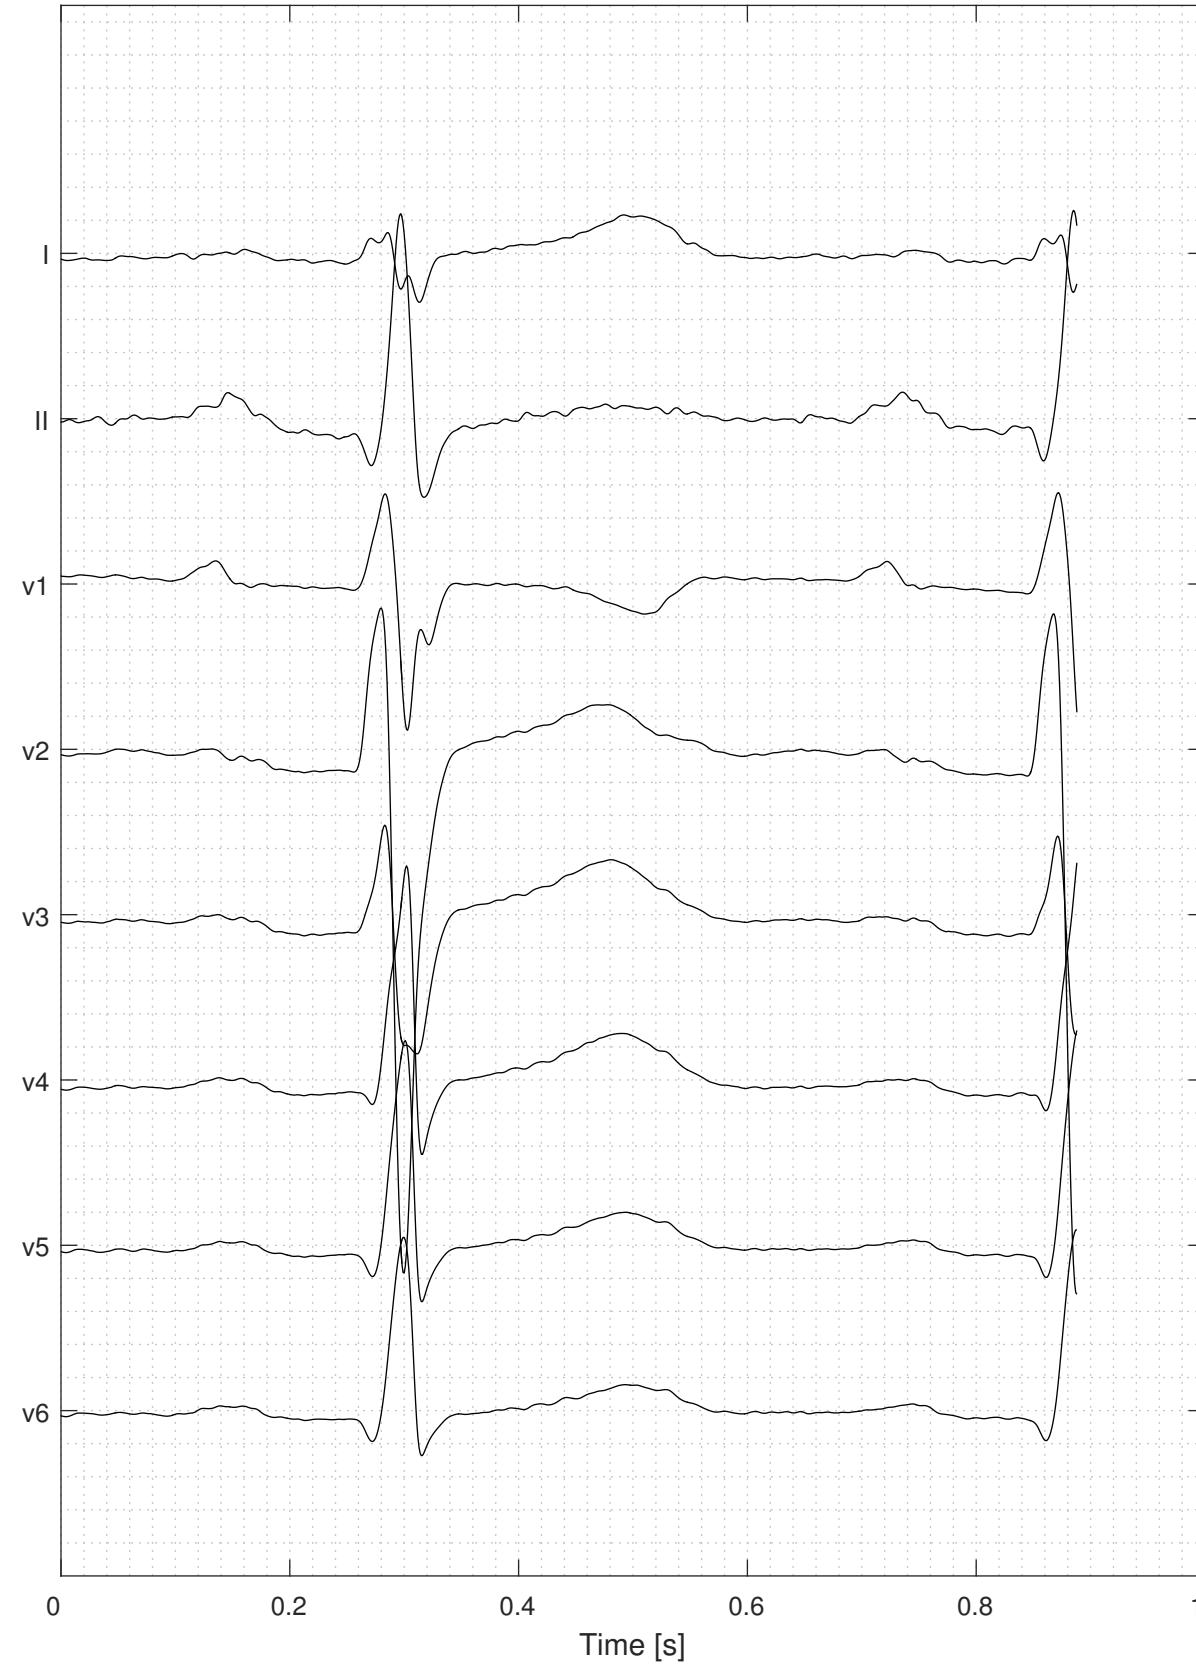

High RR, Complex #: 113

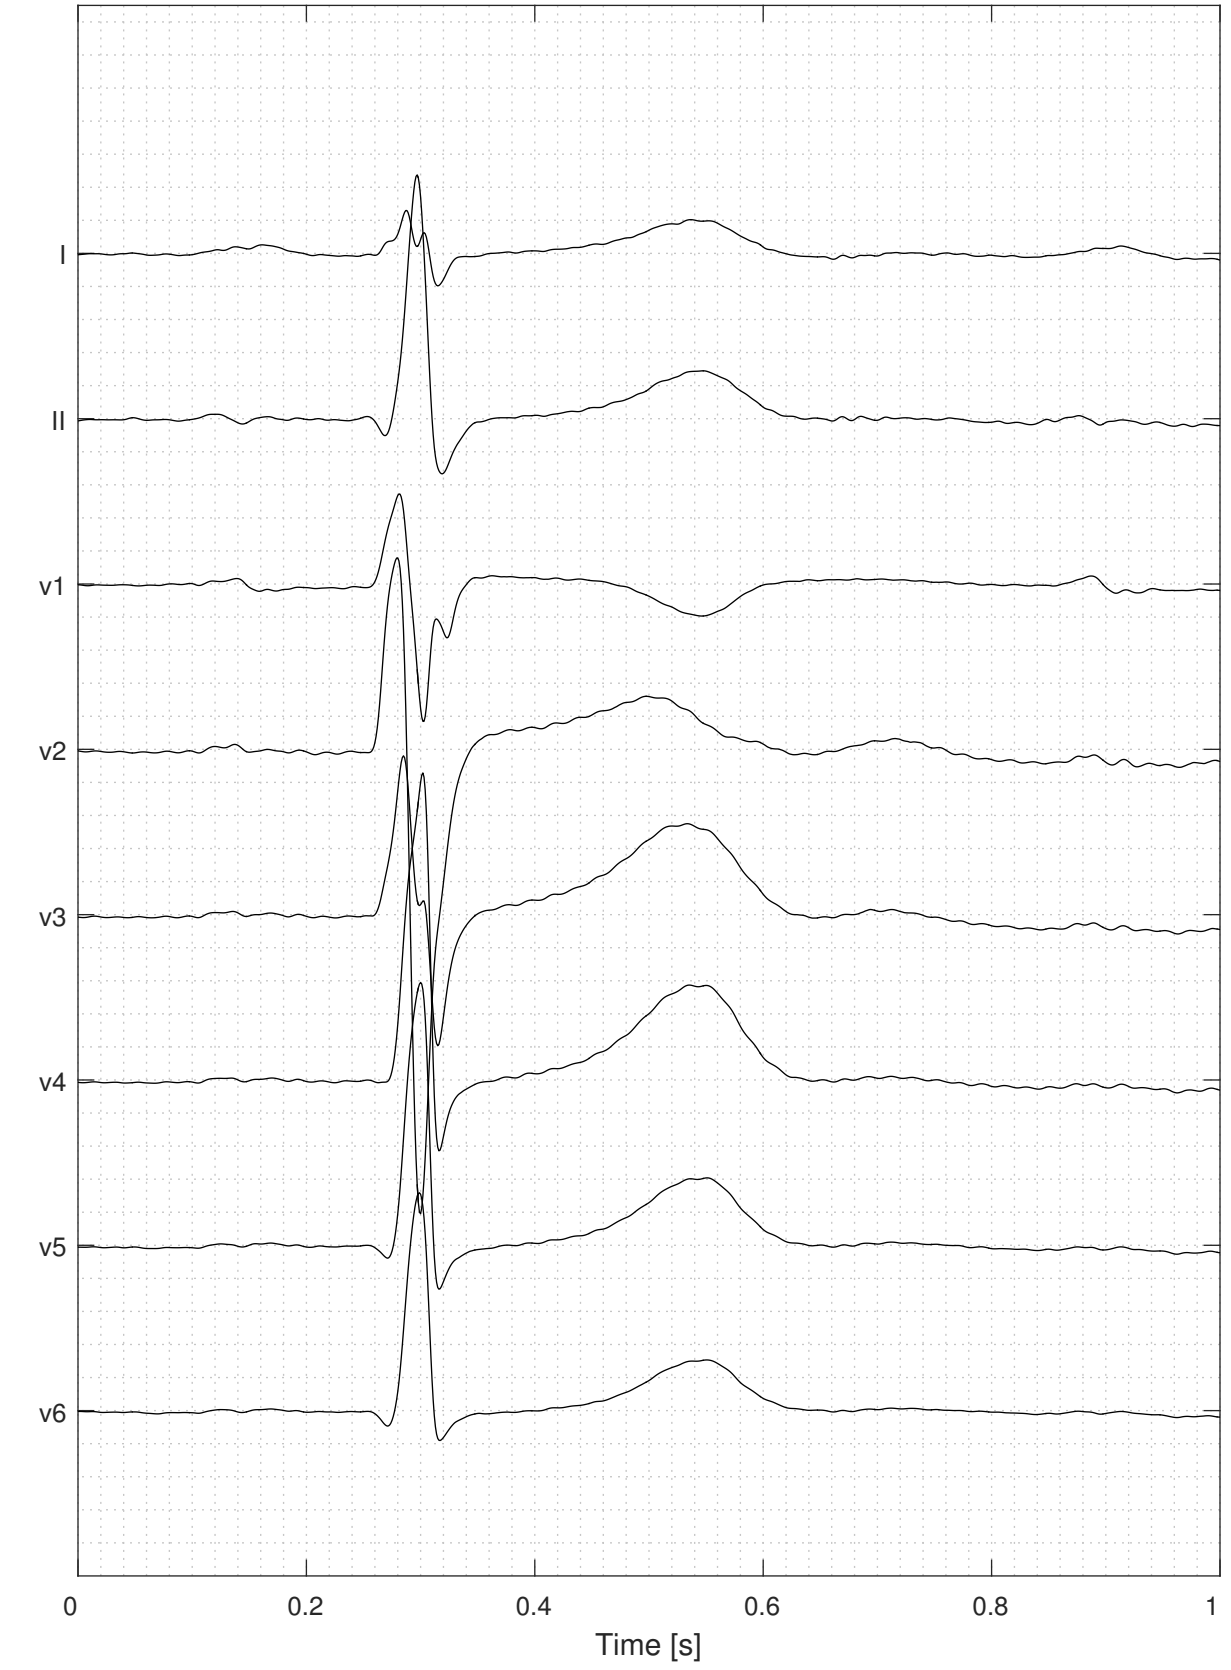

Patient 42

Low RR, Complex #: 214

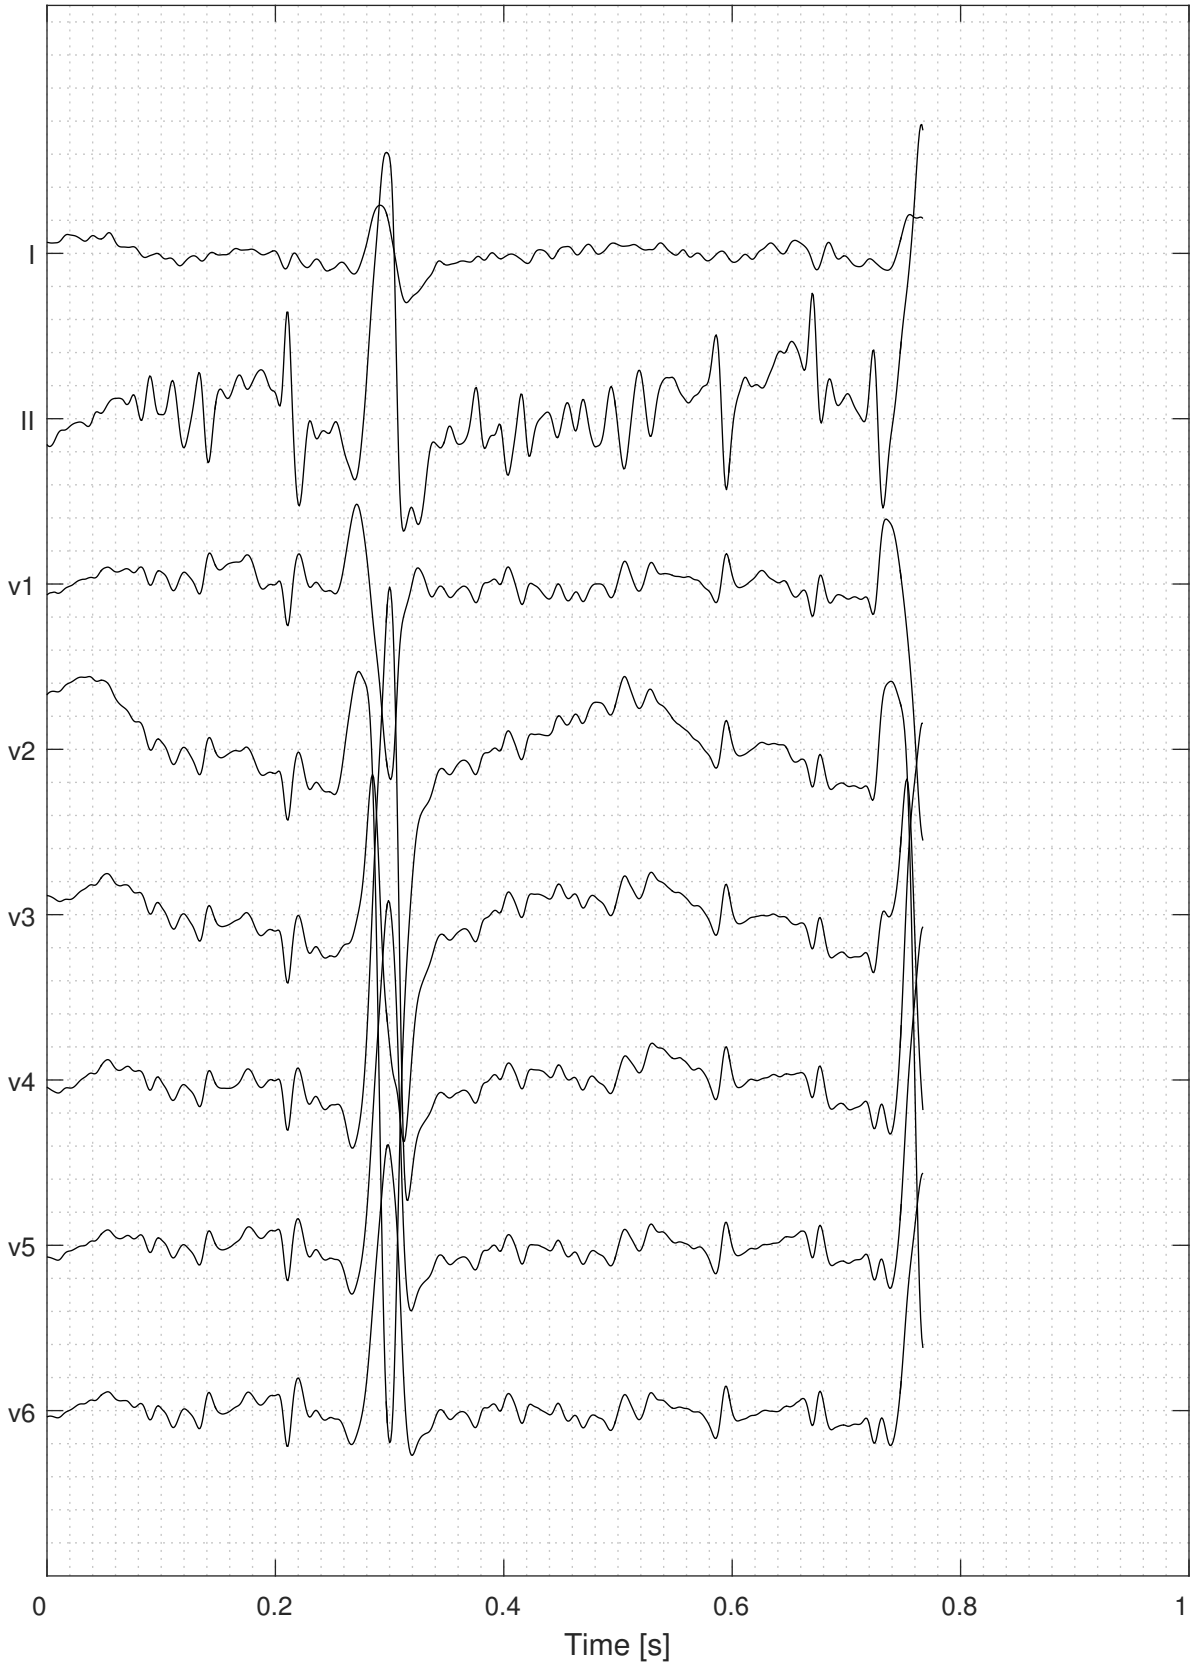

Mid RR, Complex #: 49

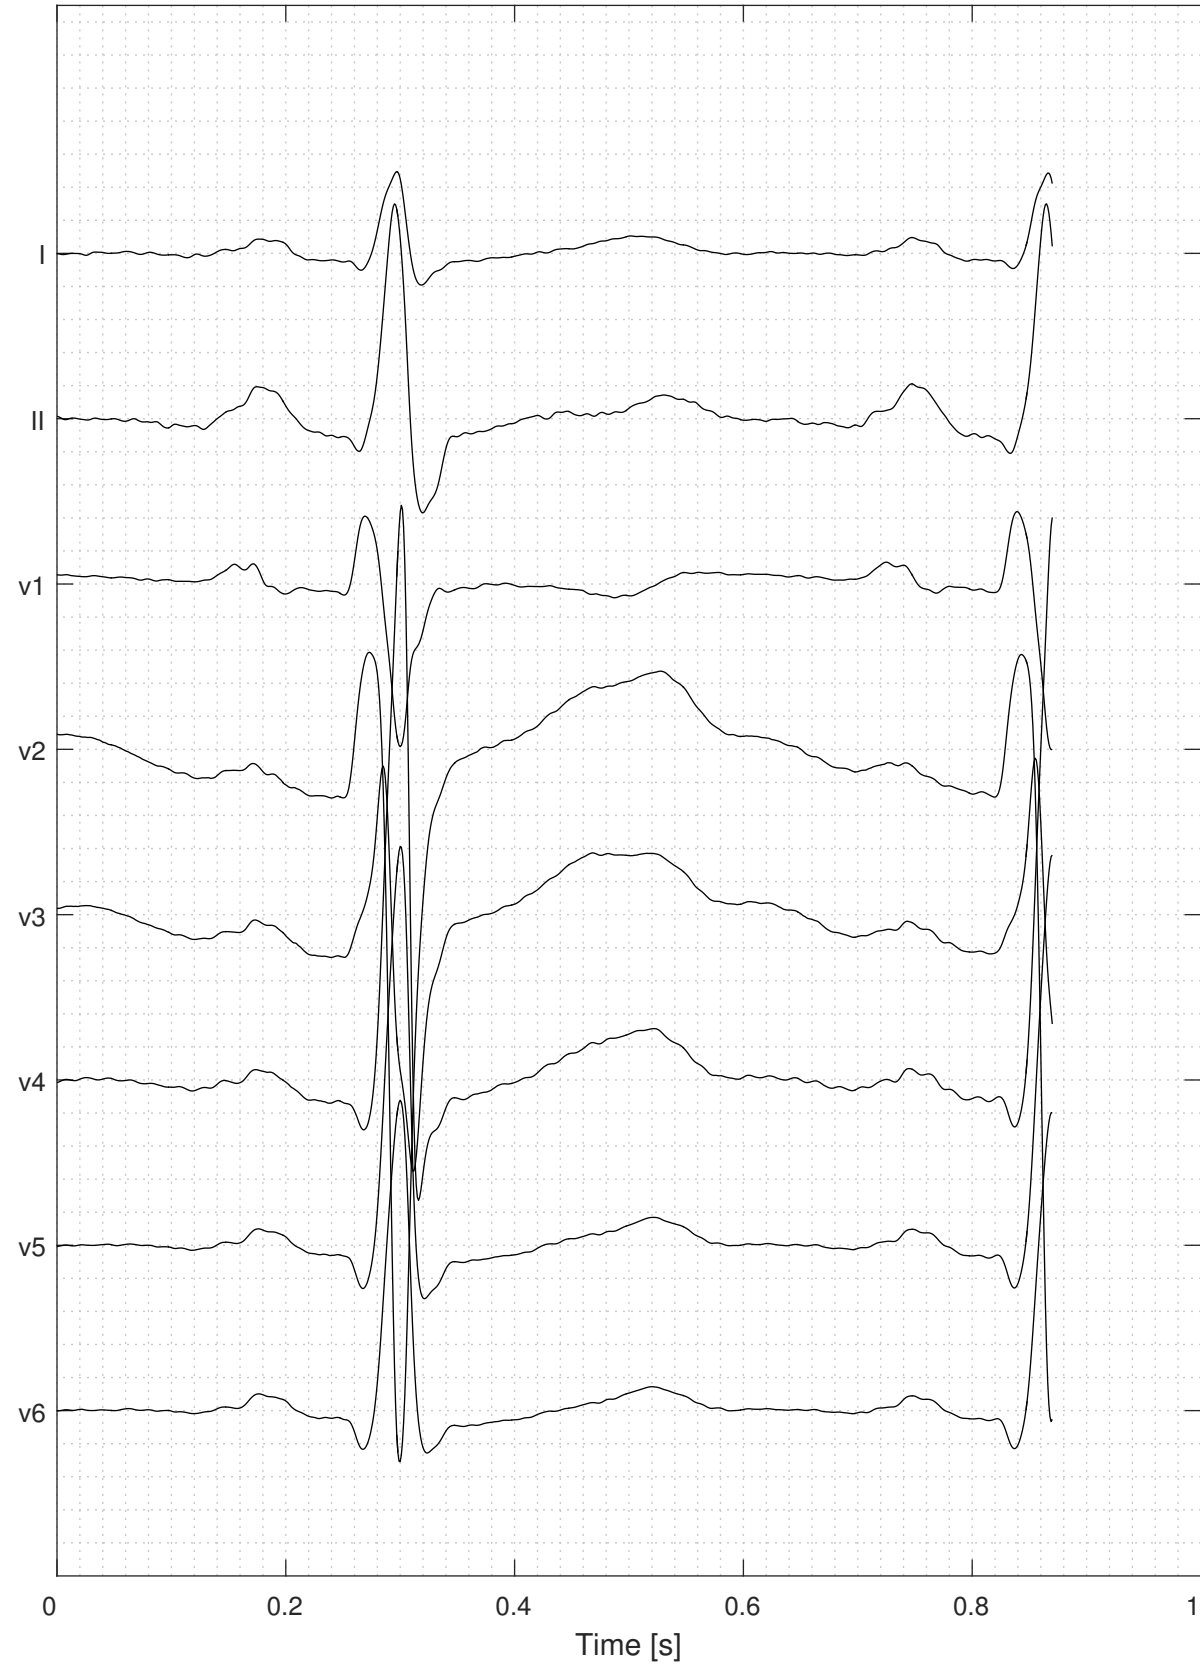

High RR, Complex #: 154

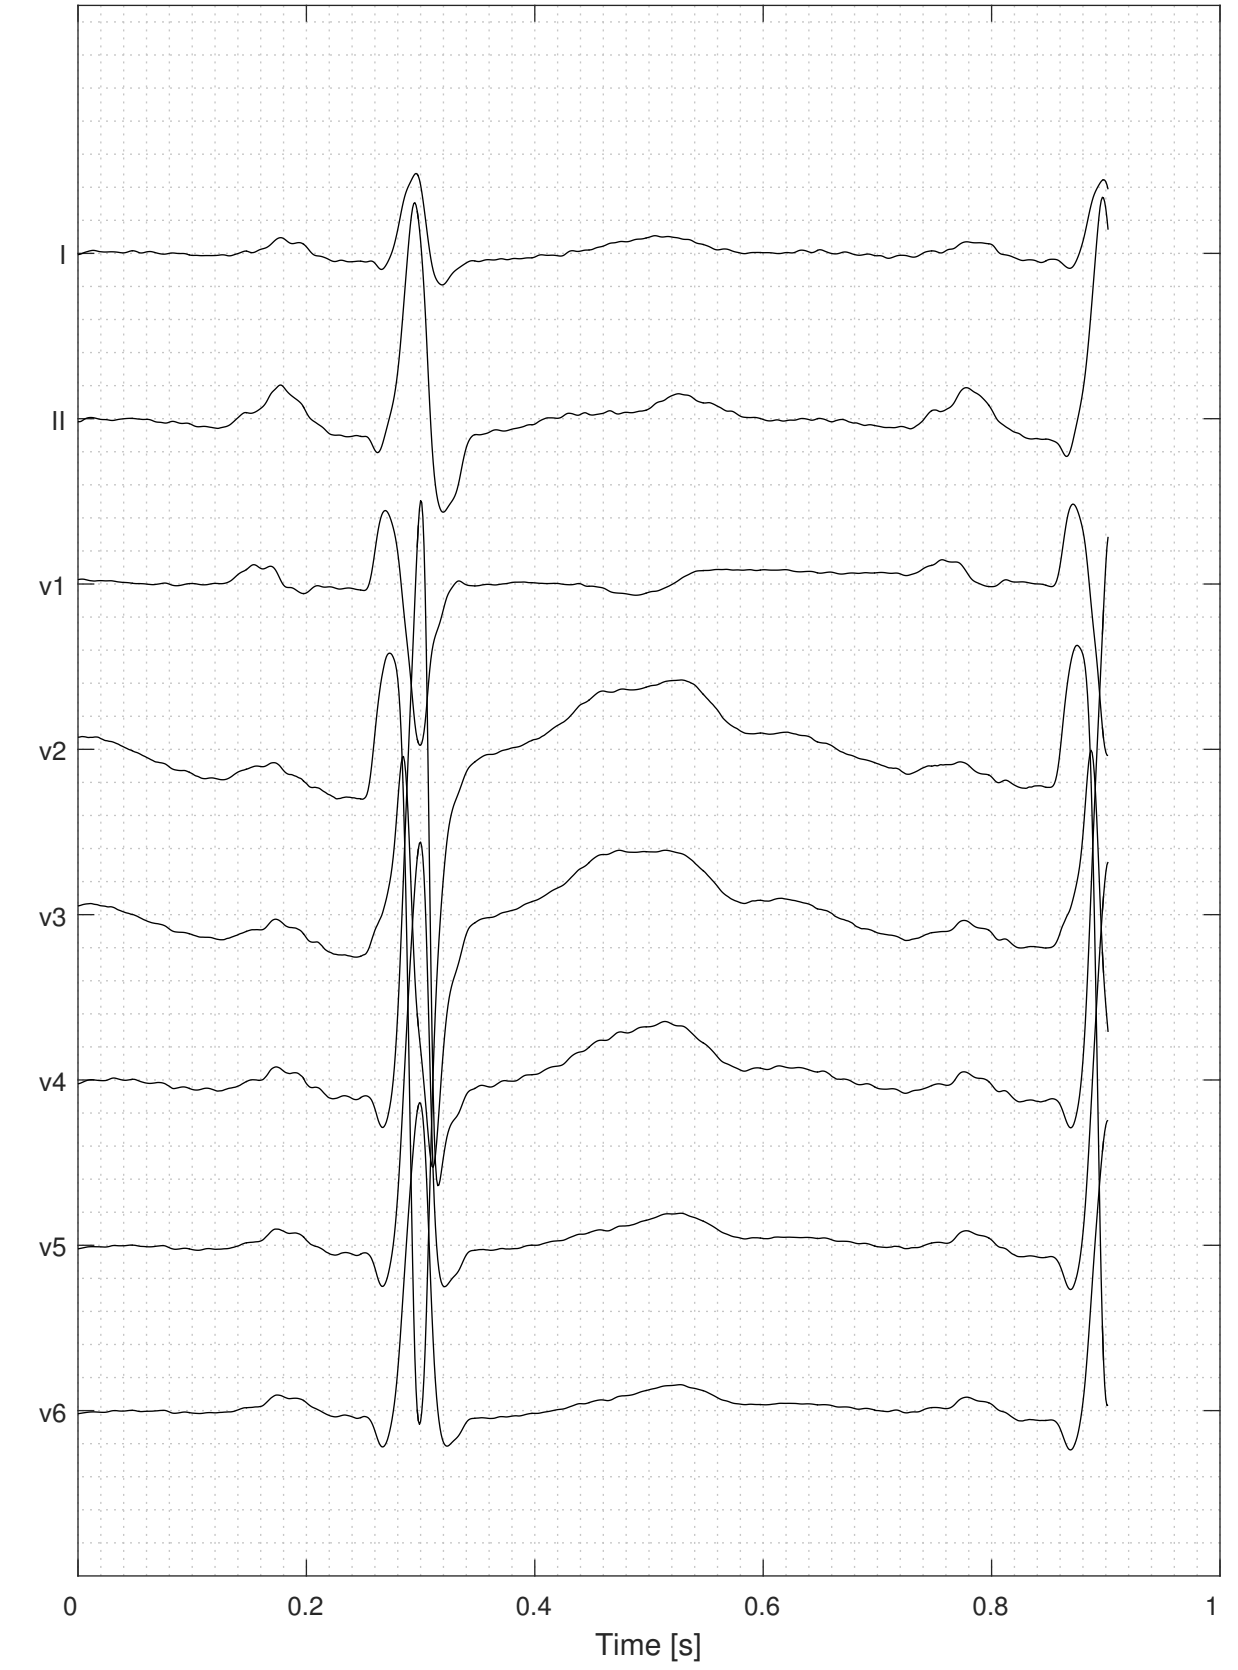

Patient 43

Low RR, Complex #: 311

Mid RR, Complex #: 200

High RR, Complex #: 41

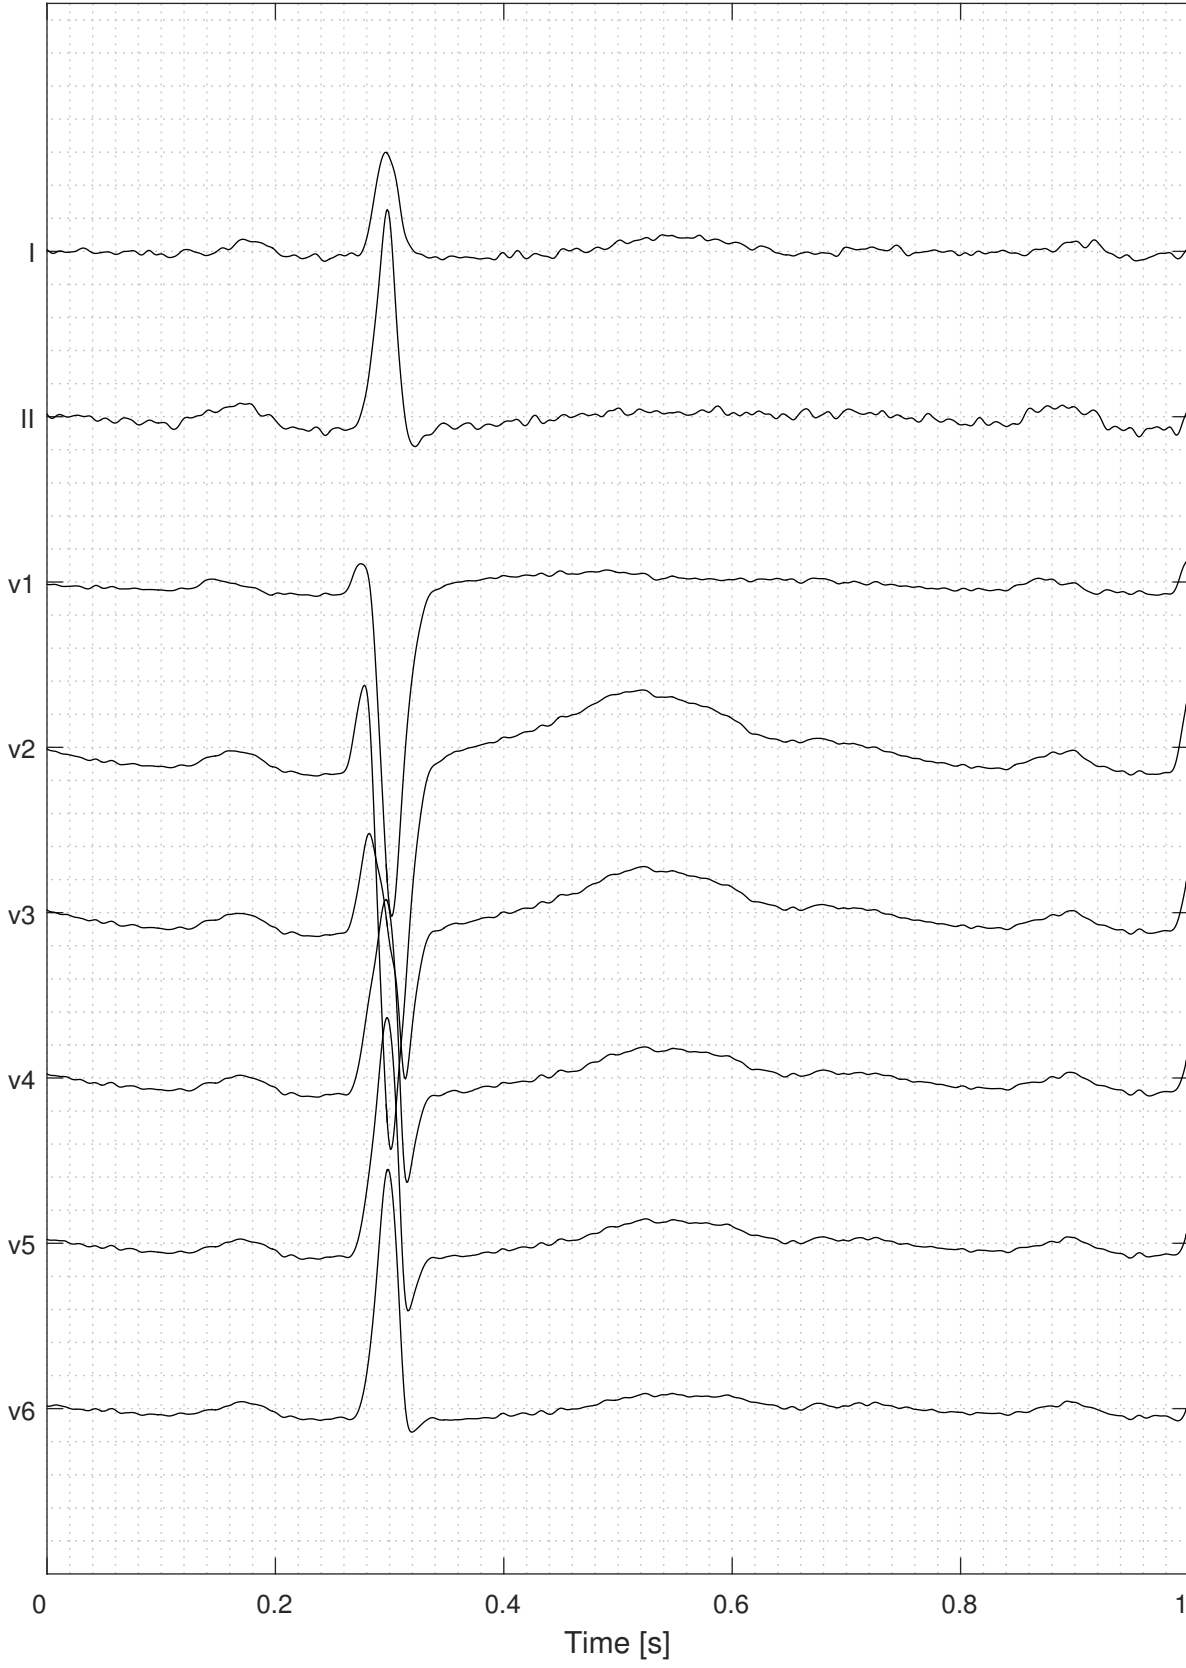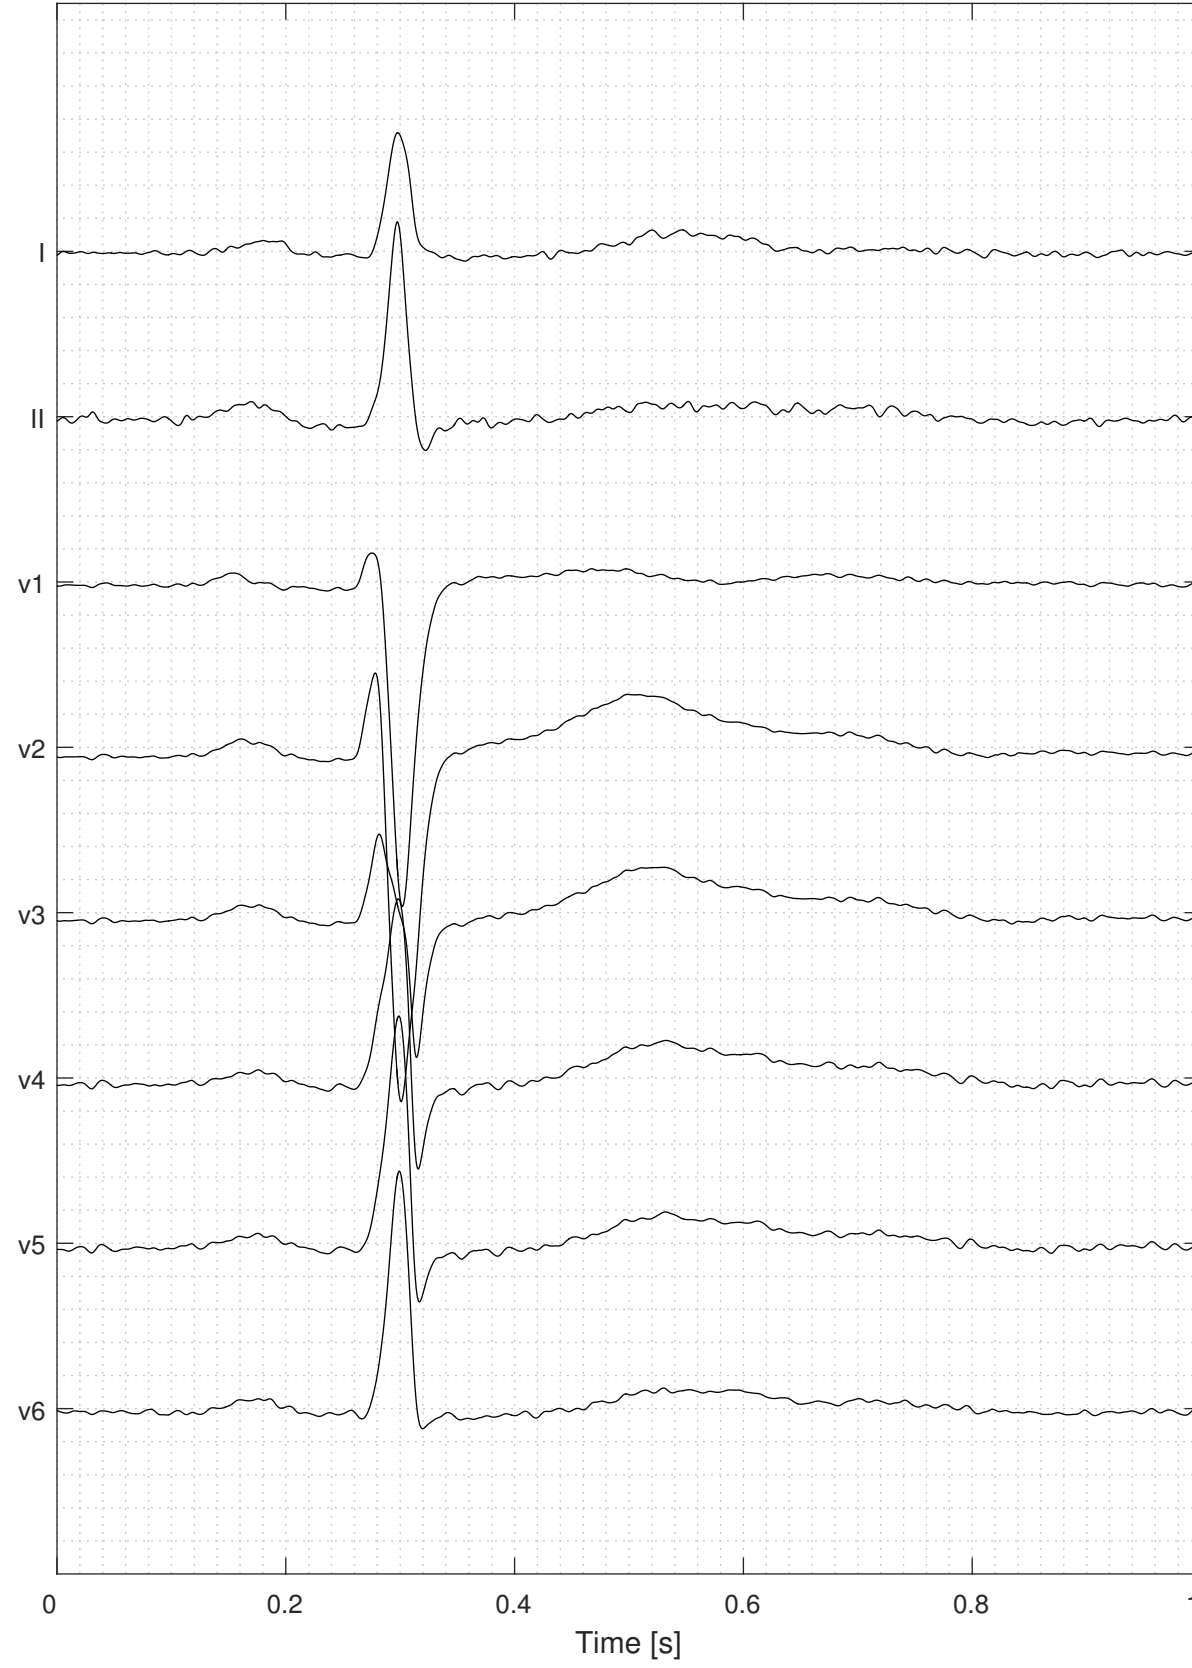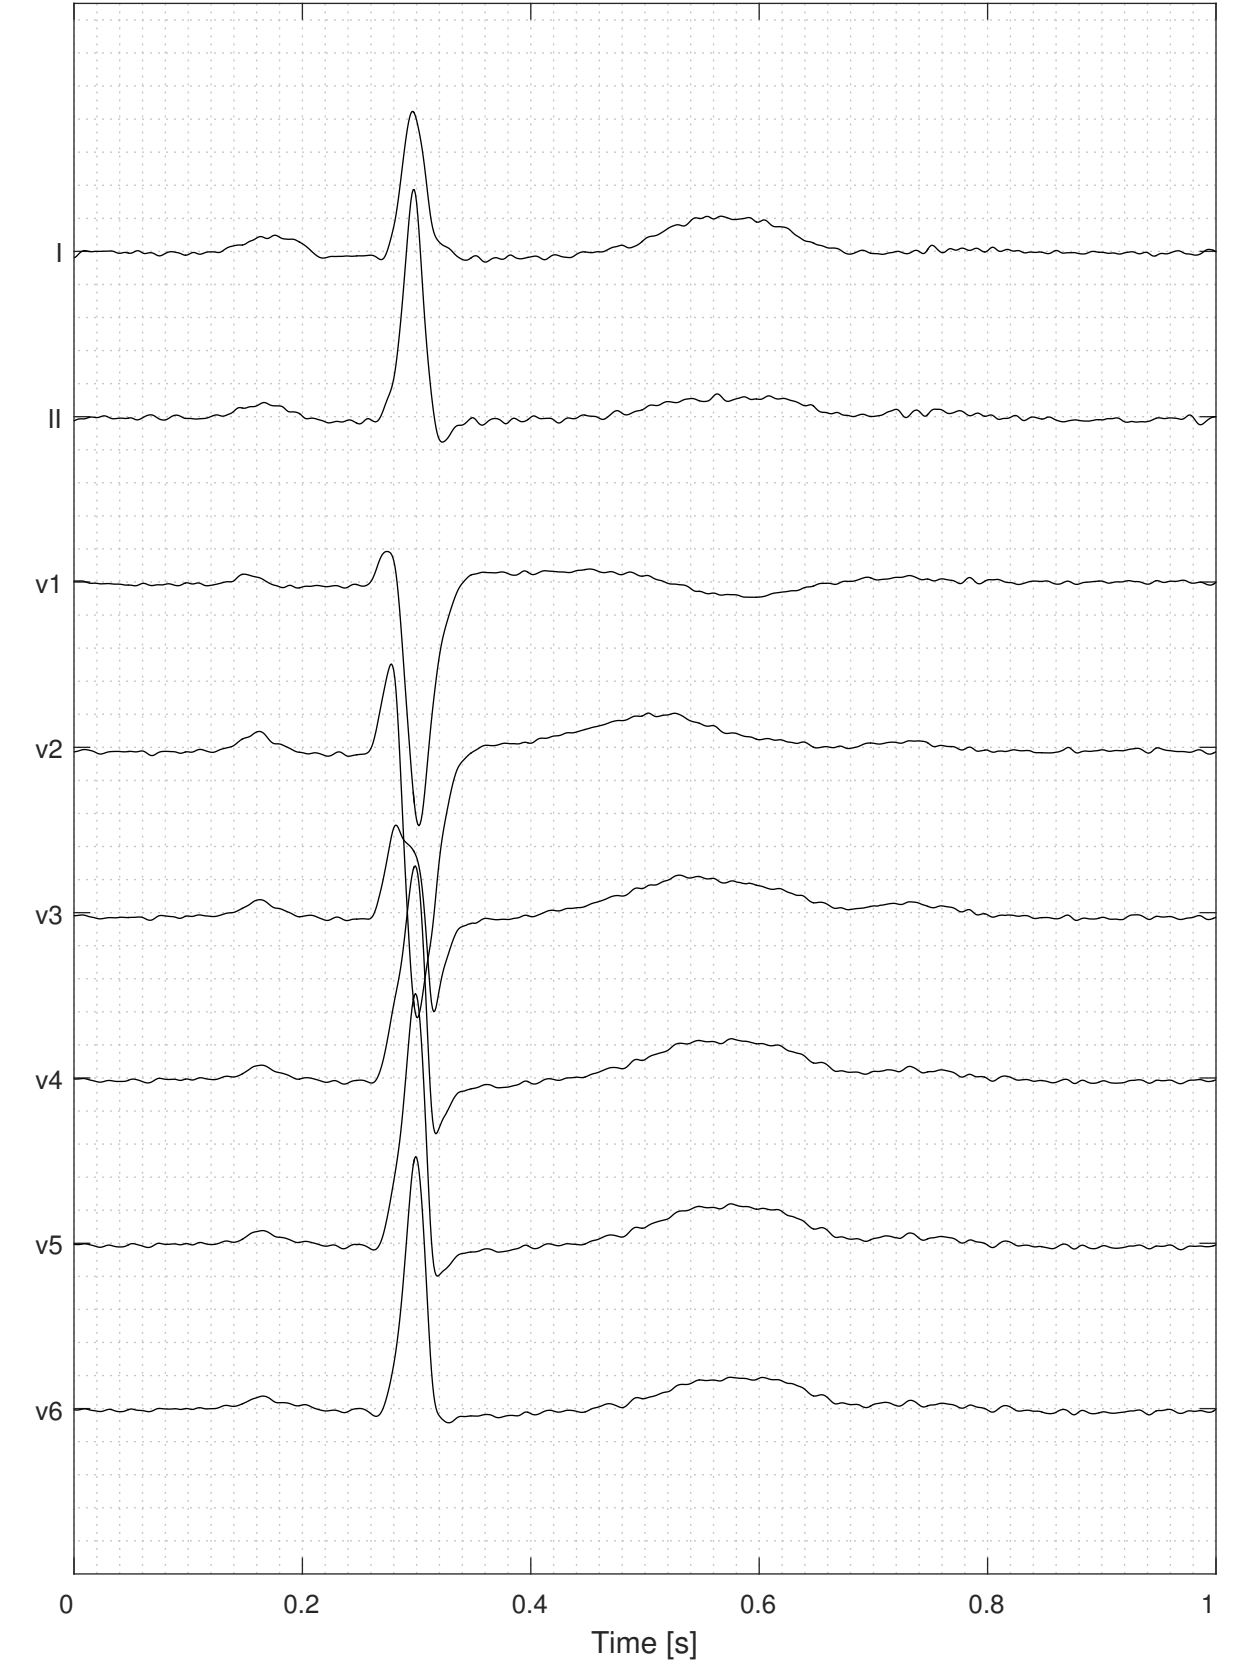

Patient 44

Low RR, Complex #: 305

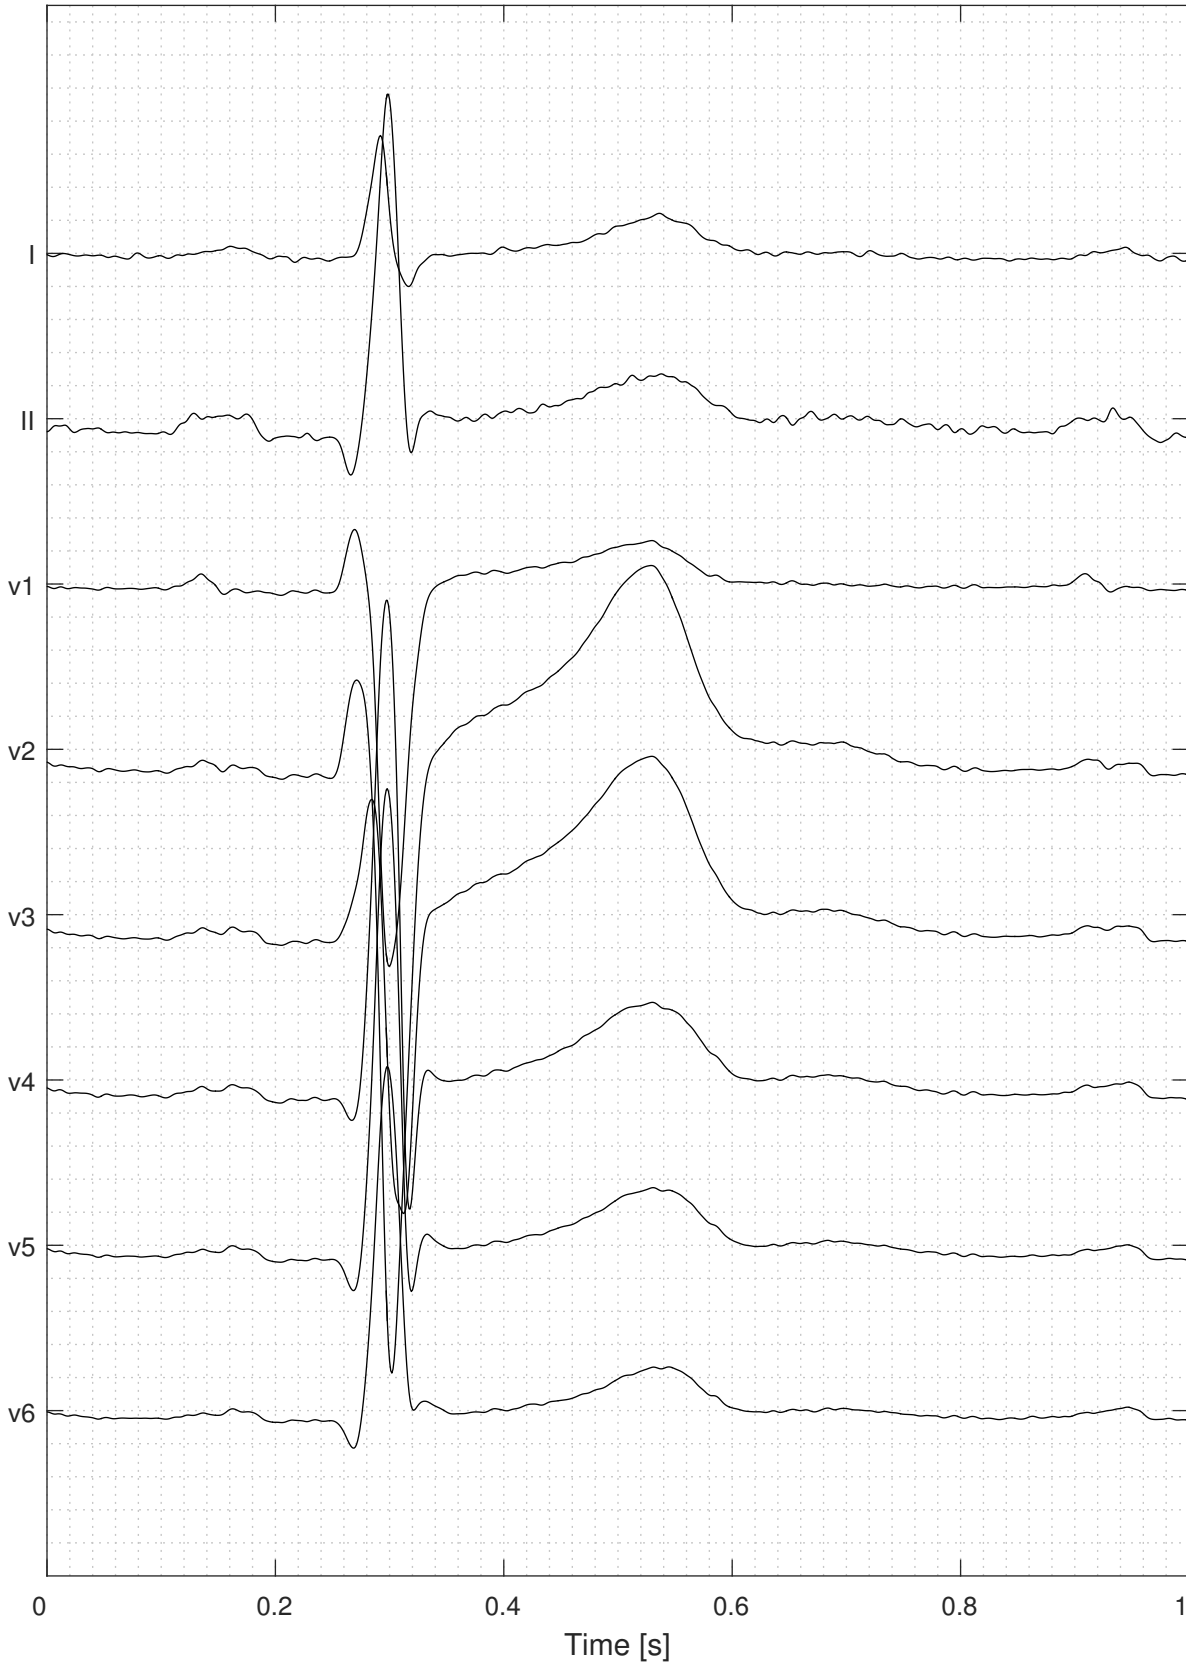

Mid RR, Complex #: 135

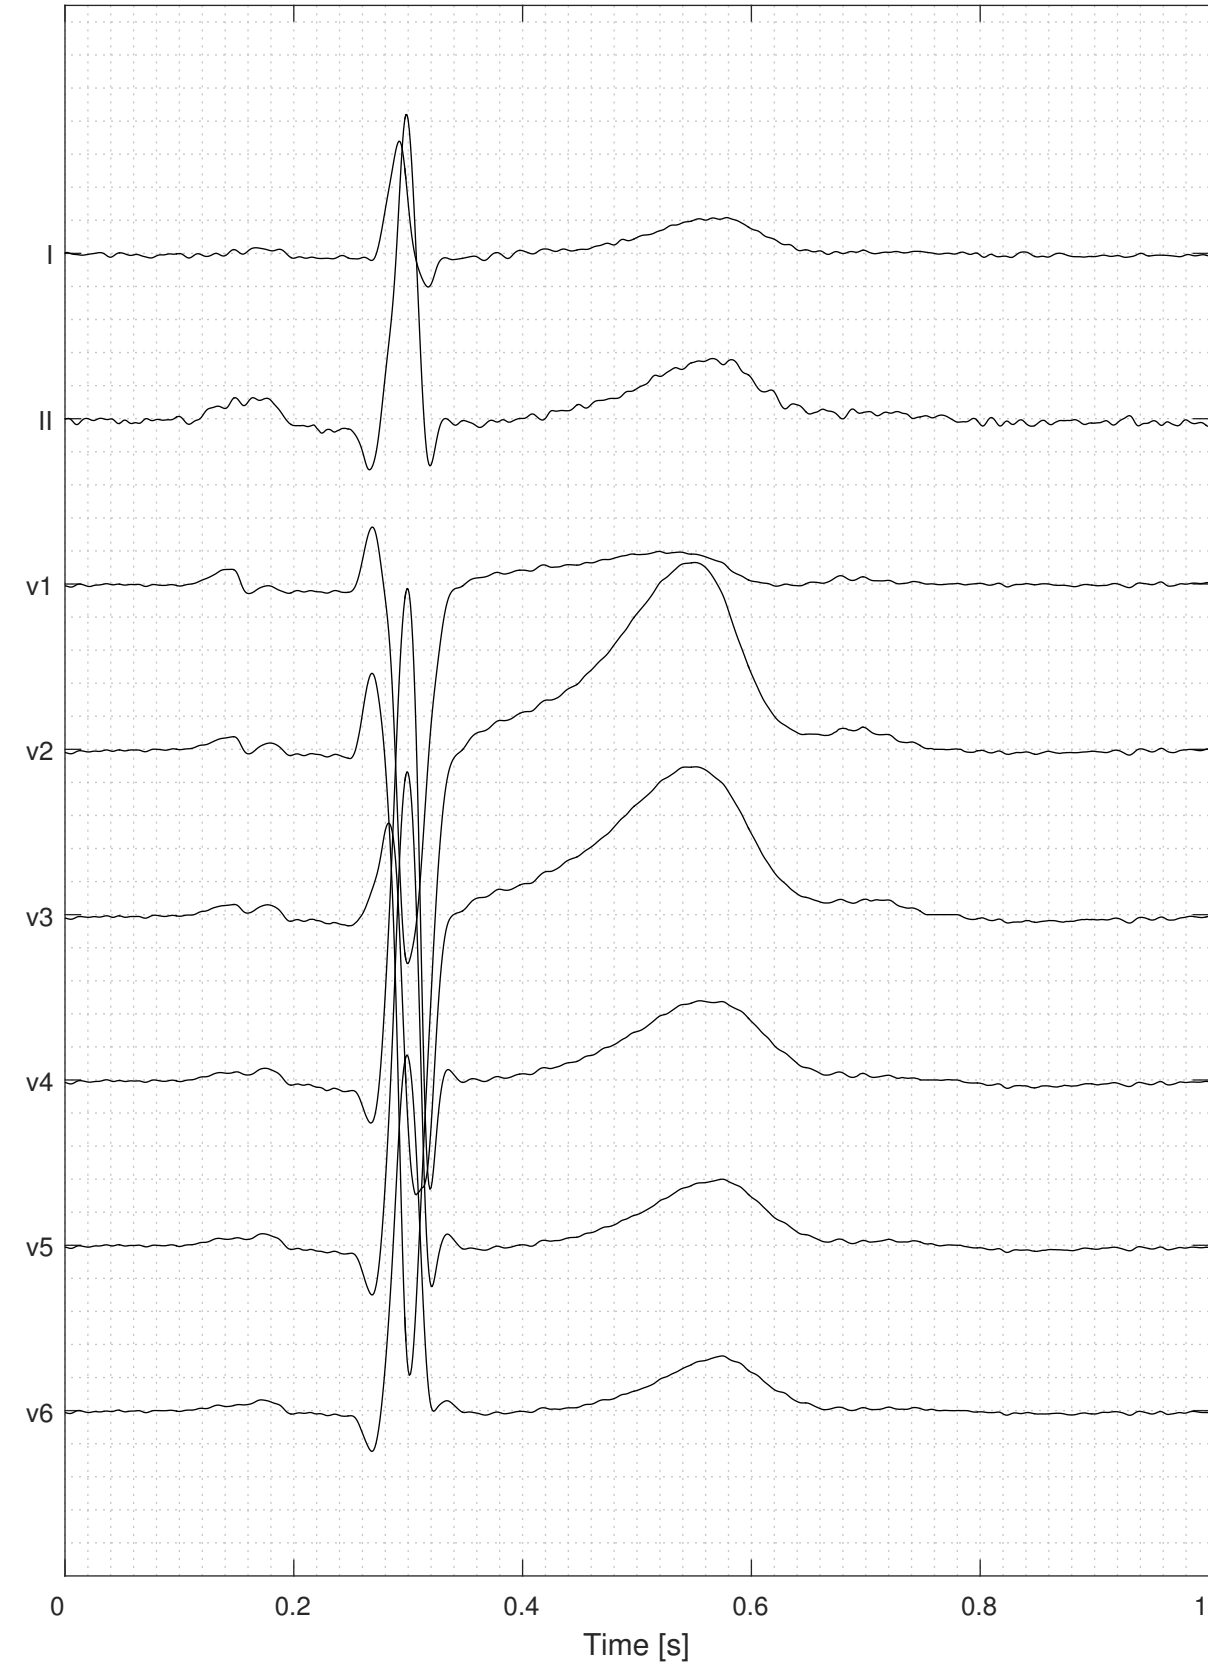

High RR, Complex #: 29

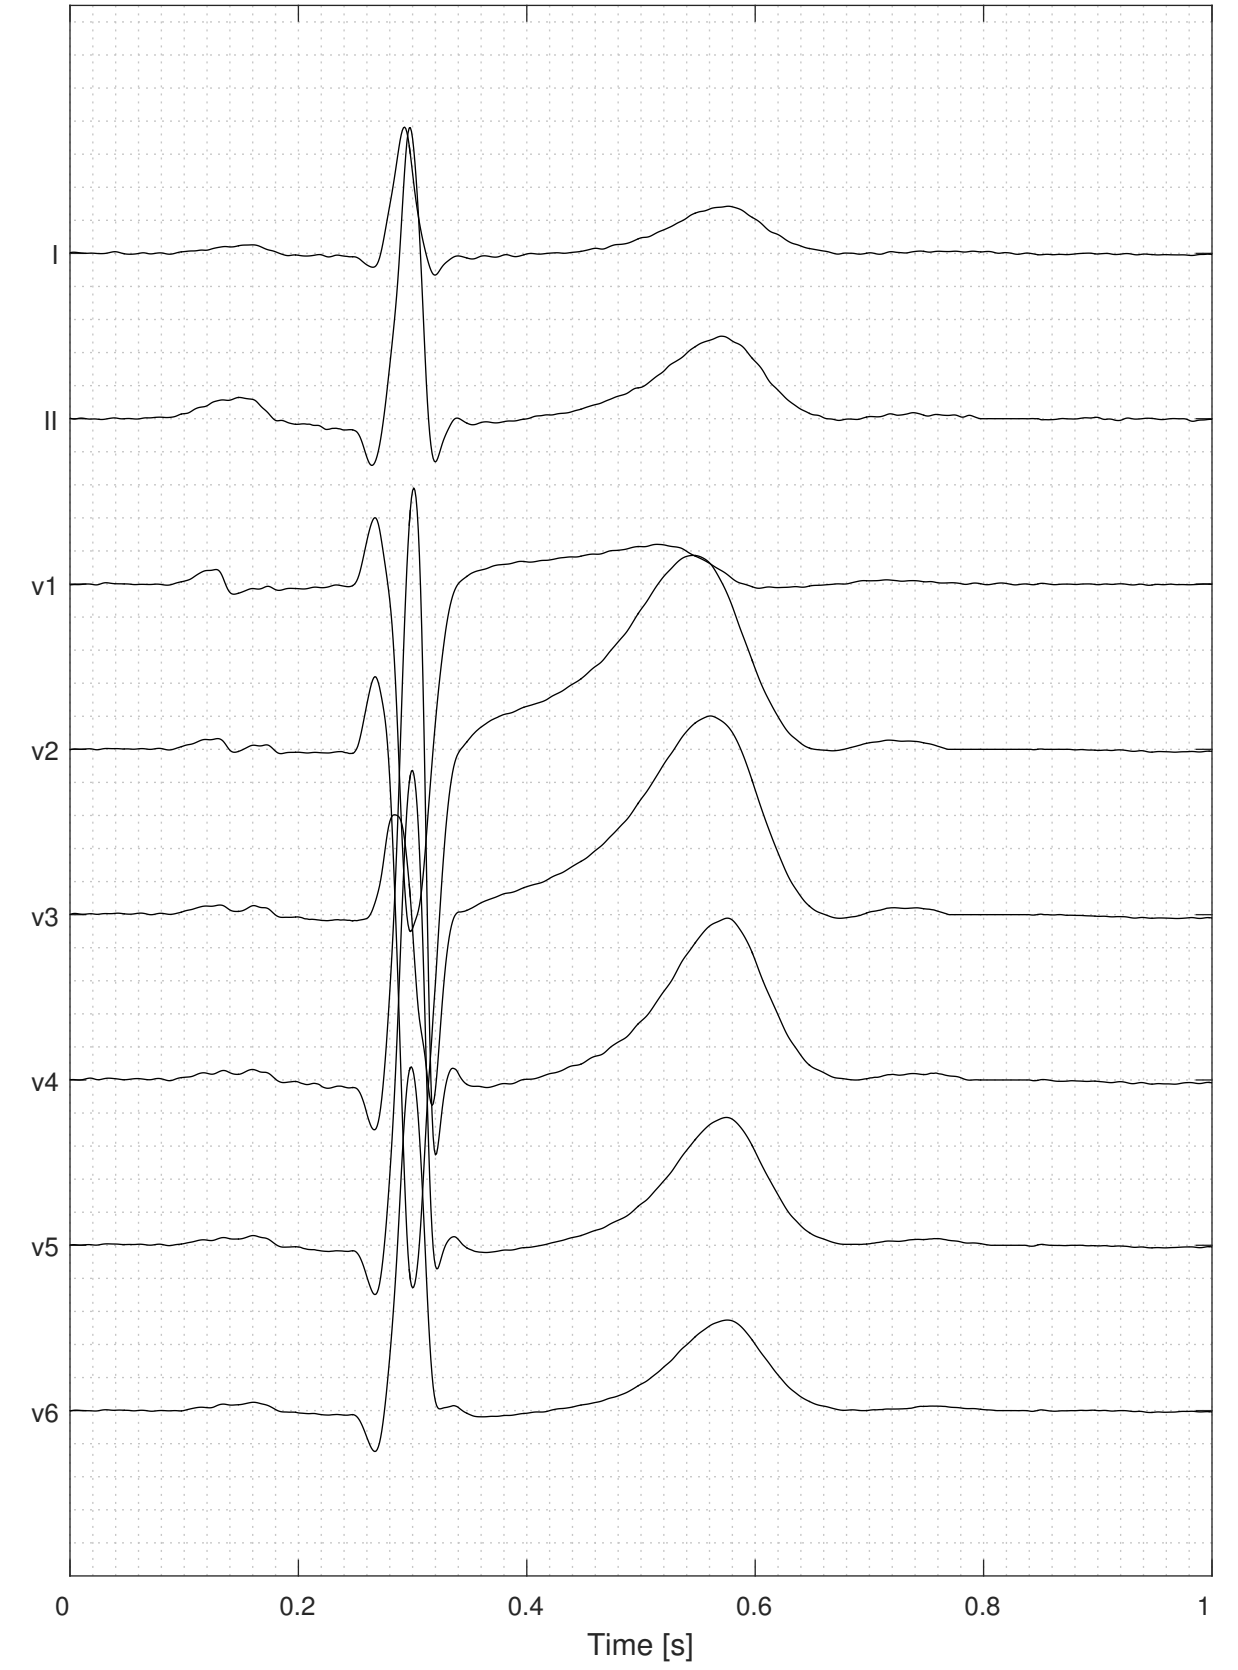

Patient 45

Low RR, Complex #: 189

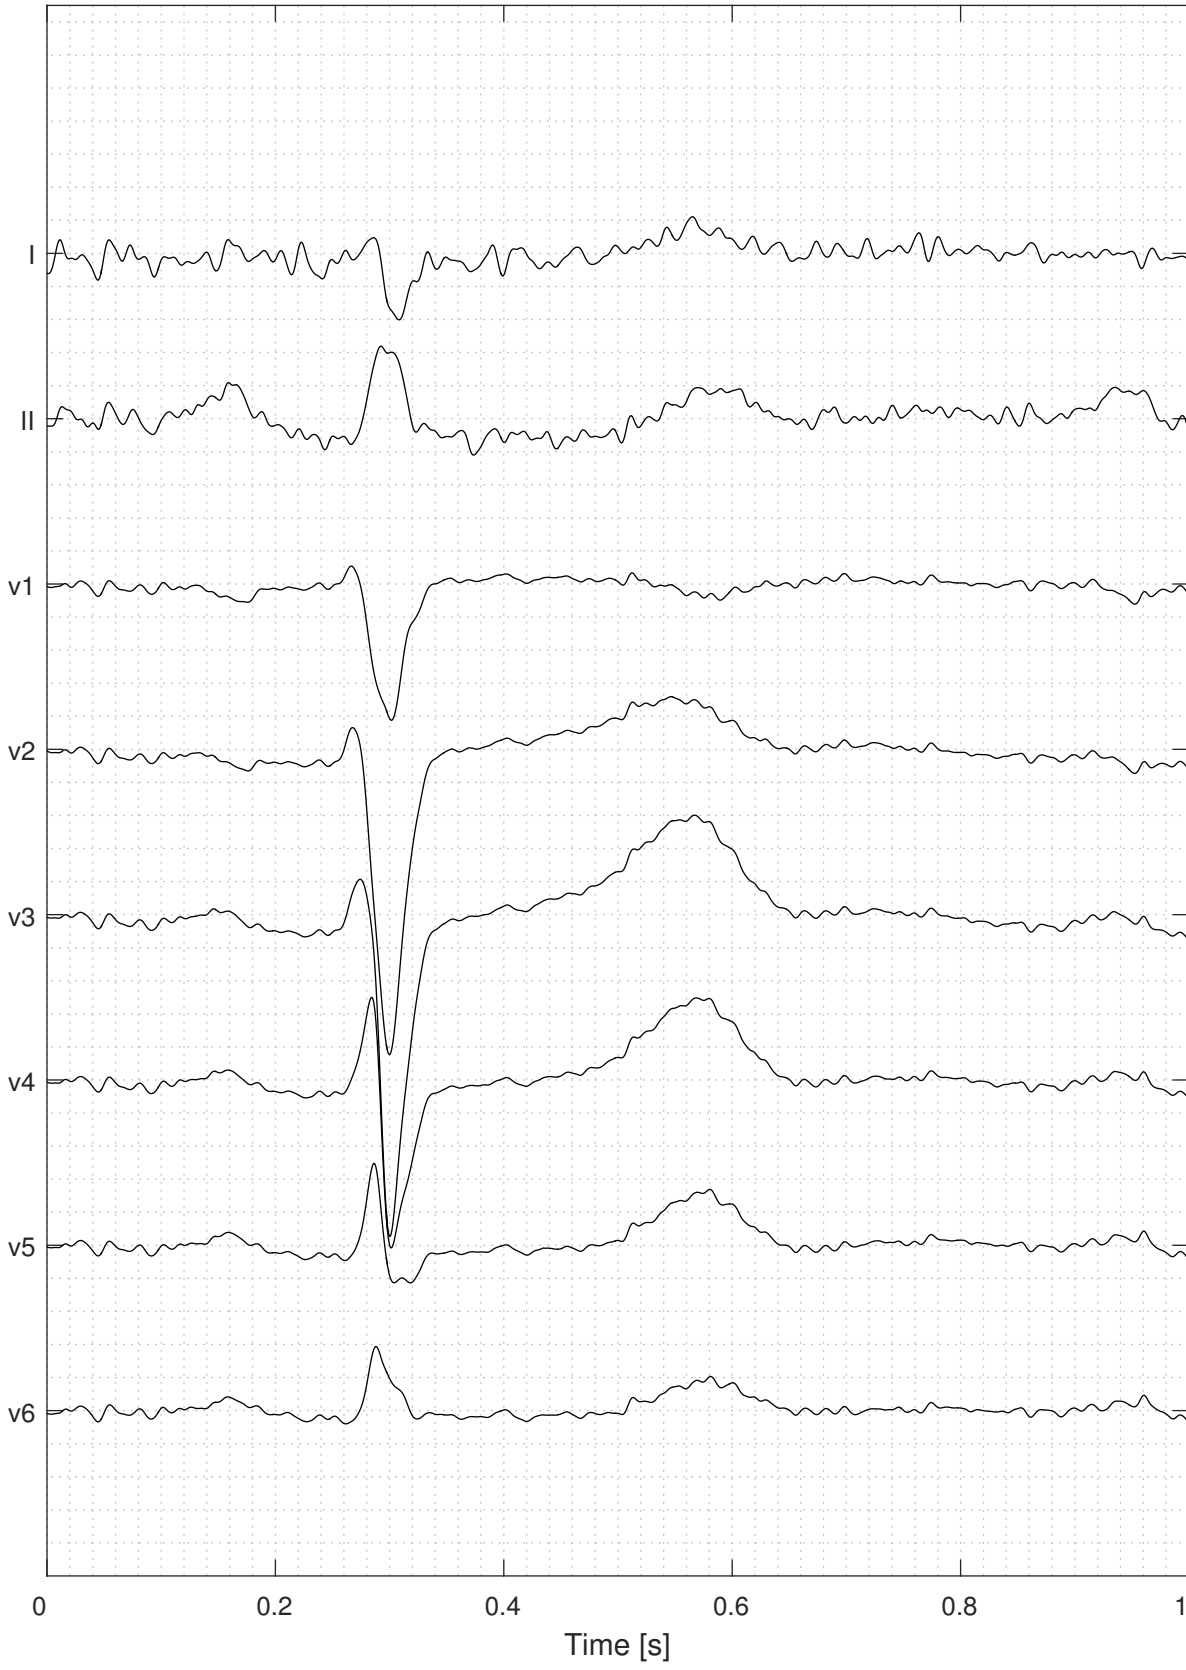

Mid RR, Complex #: 4

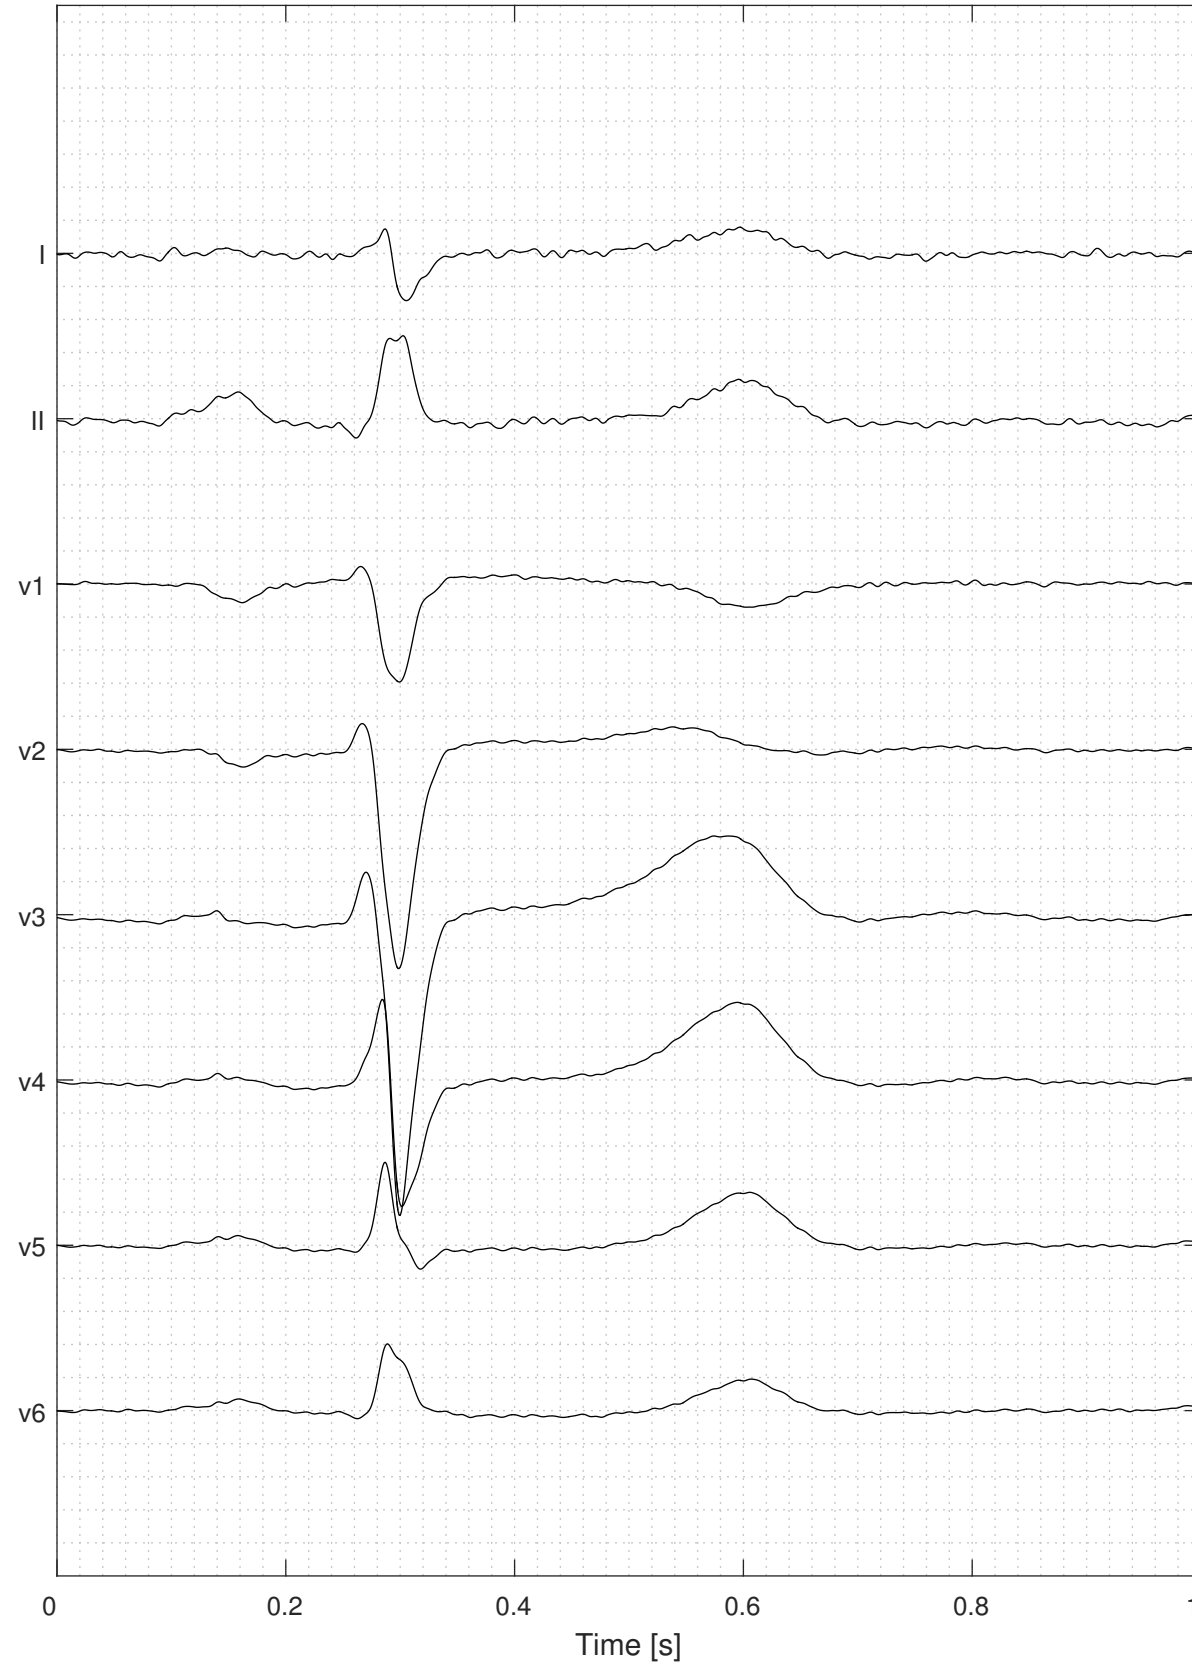

High RR, Complex #: 35

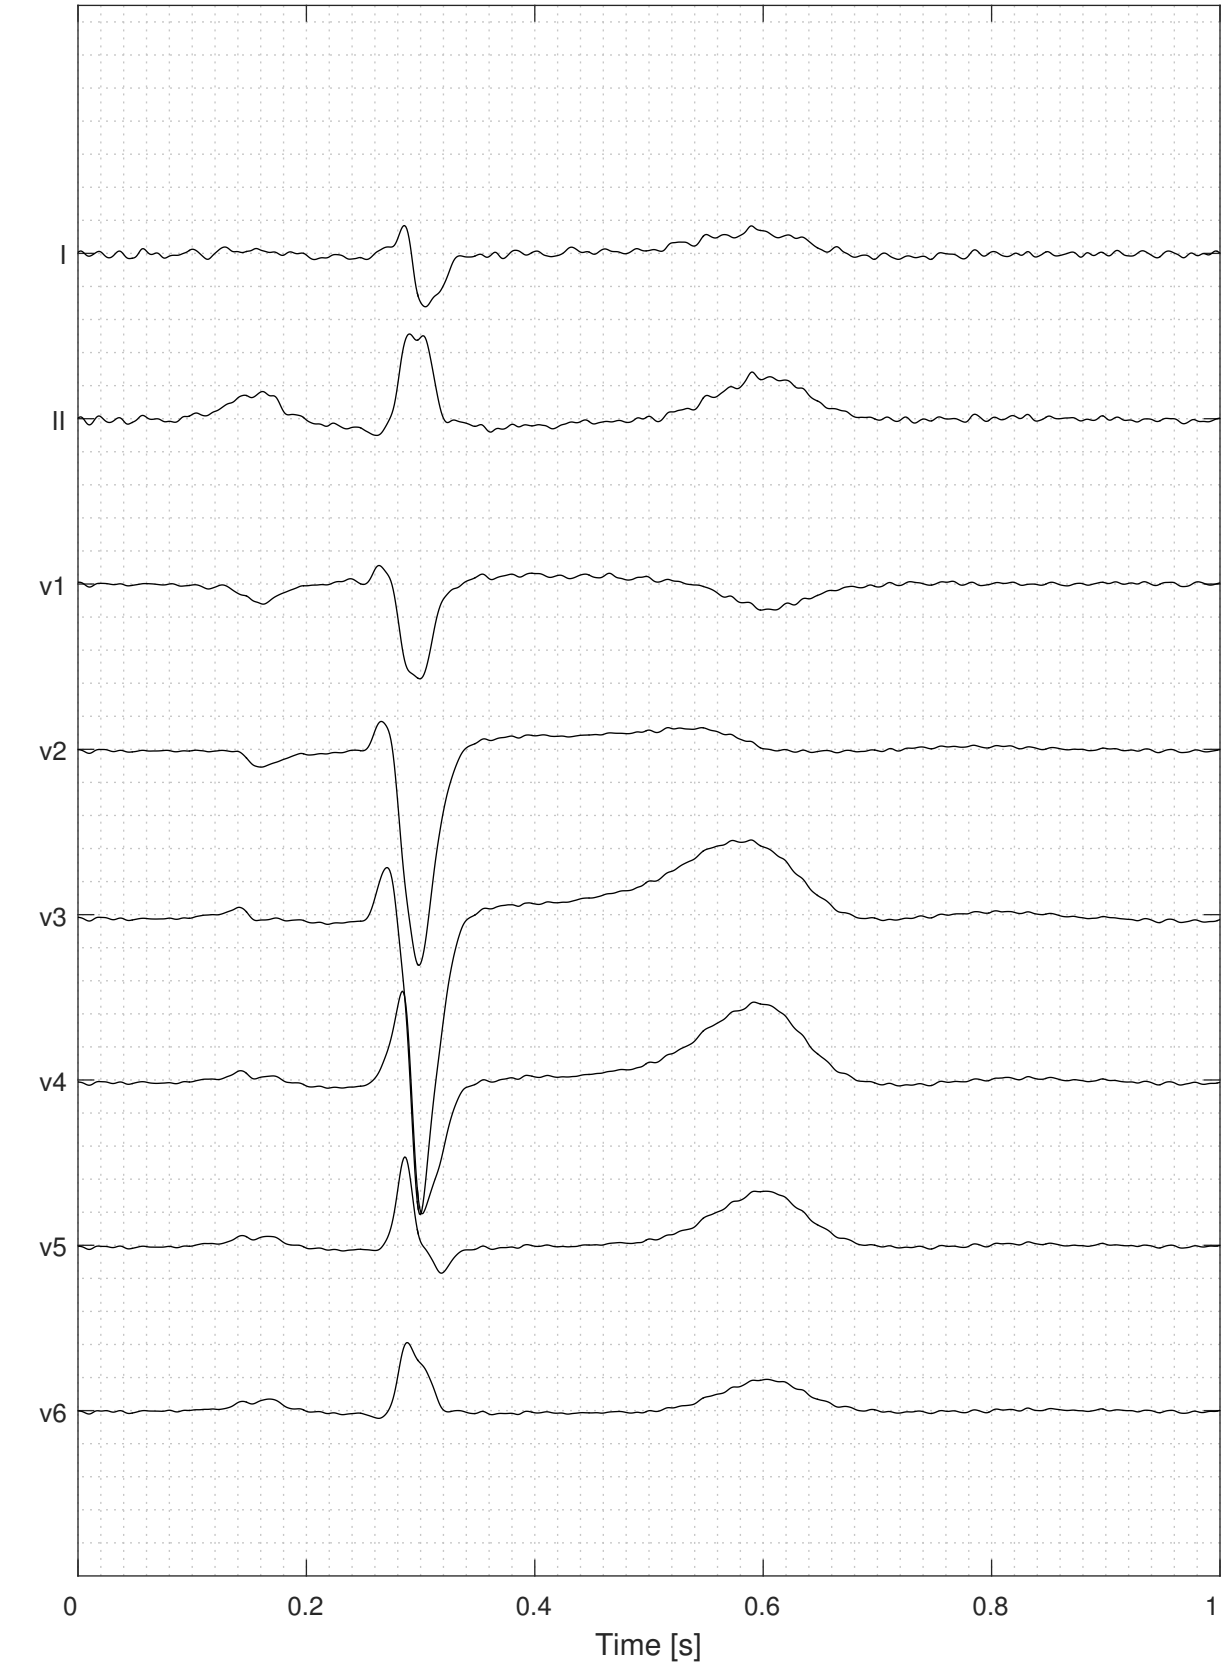

Patient 46

Low RR, Complex #: 222

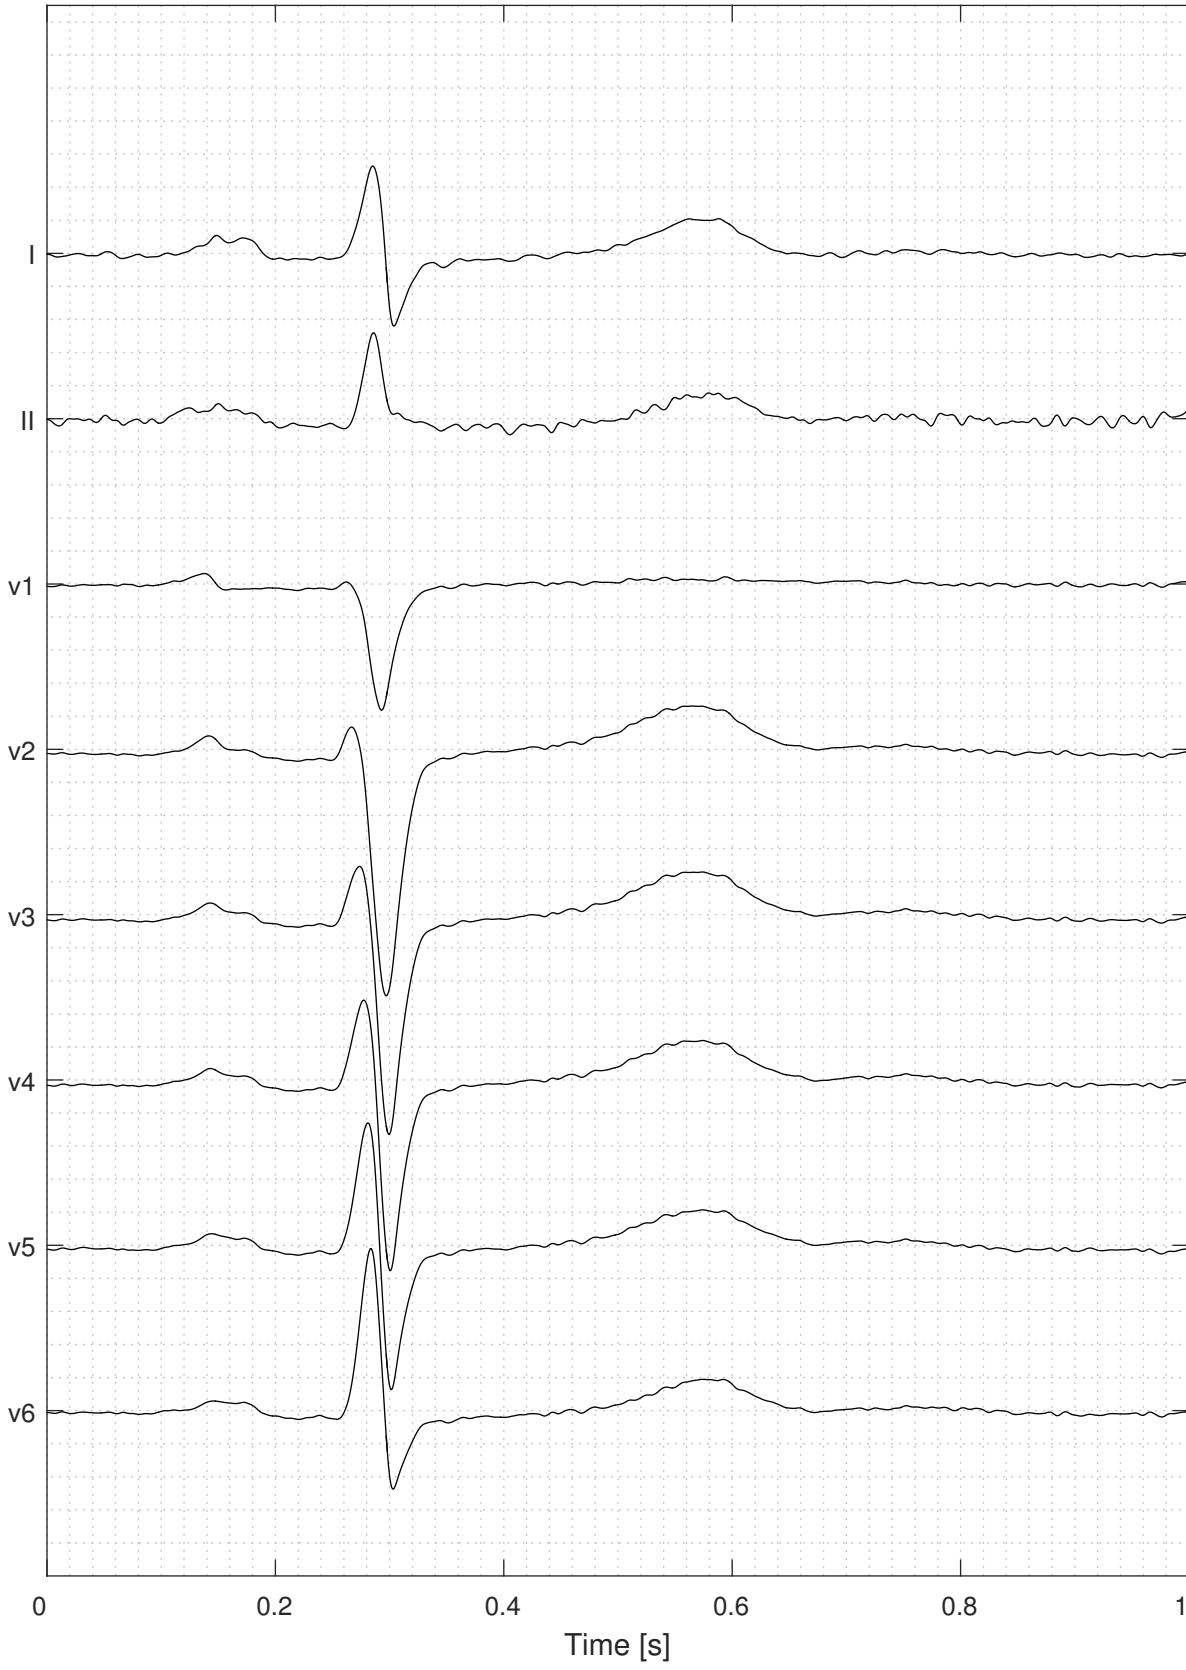

Mid RR, Complex #: 206

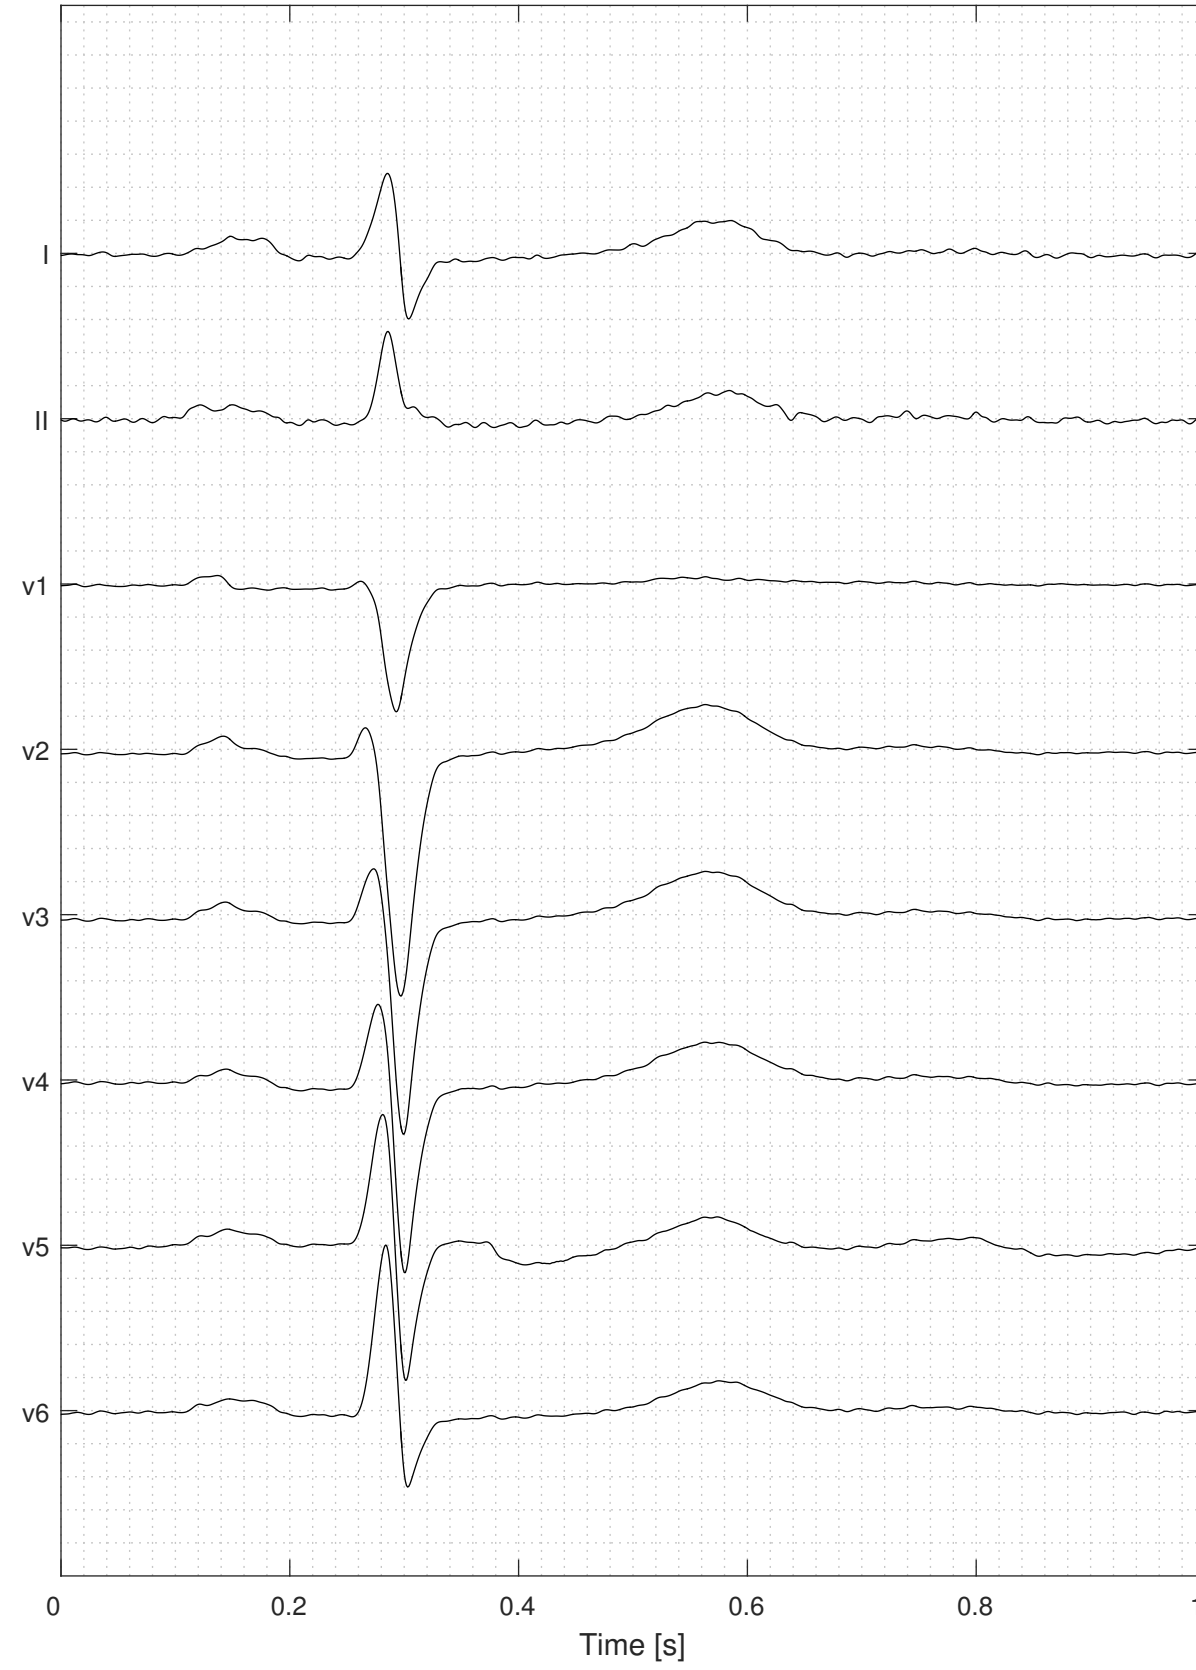

High RR, Complex #: 67

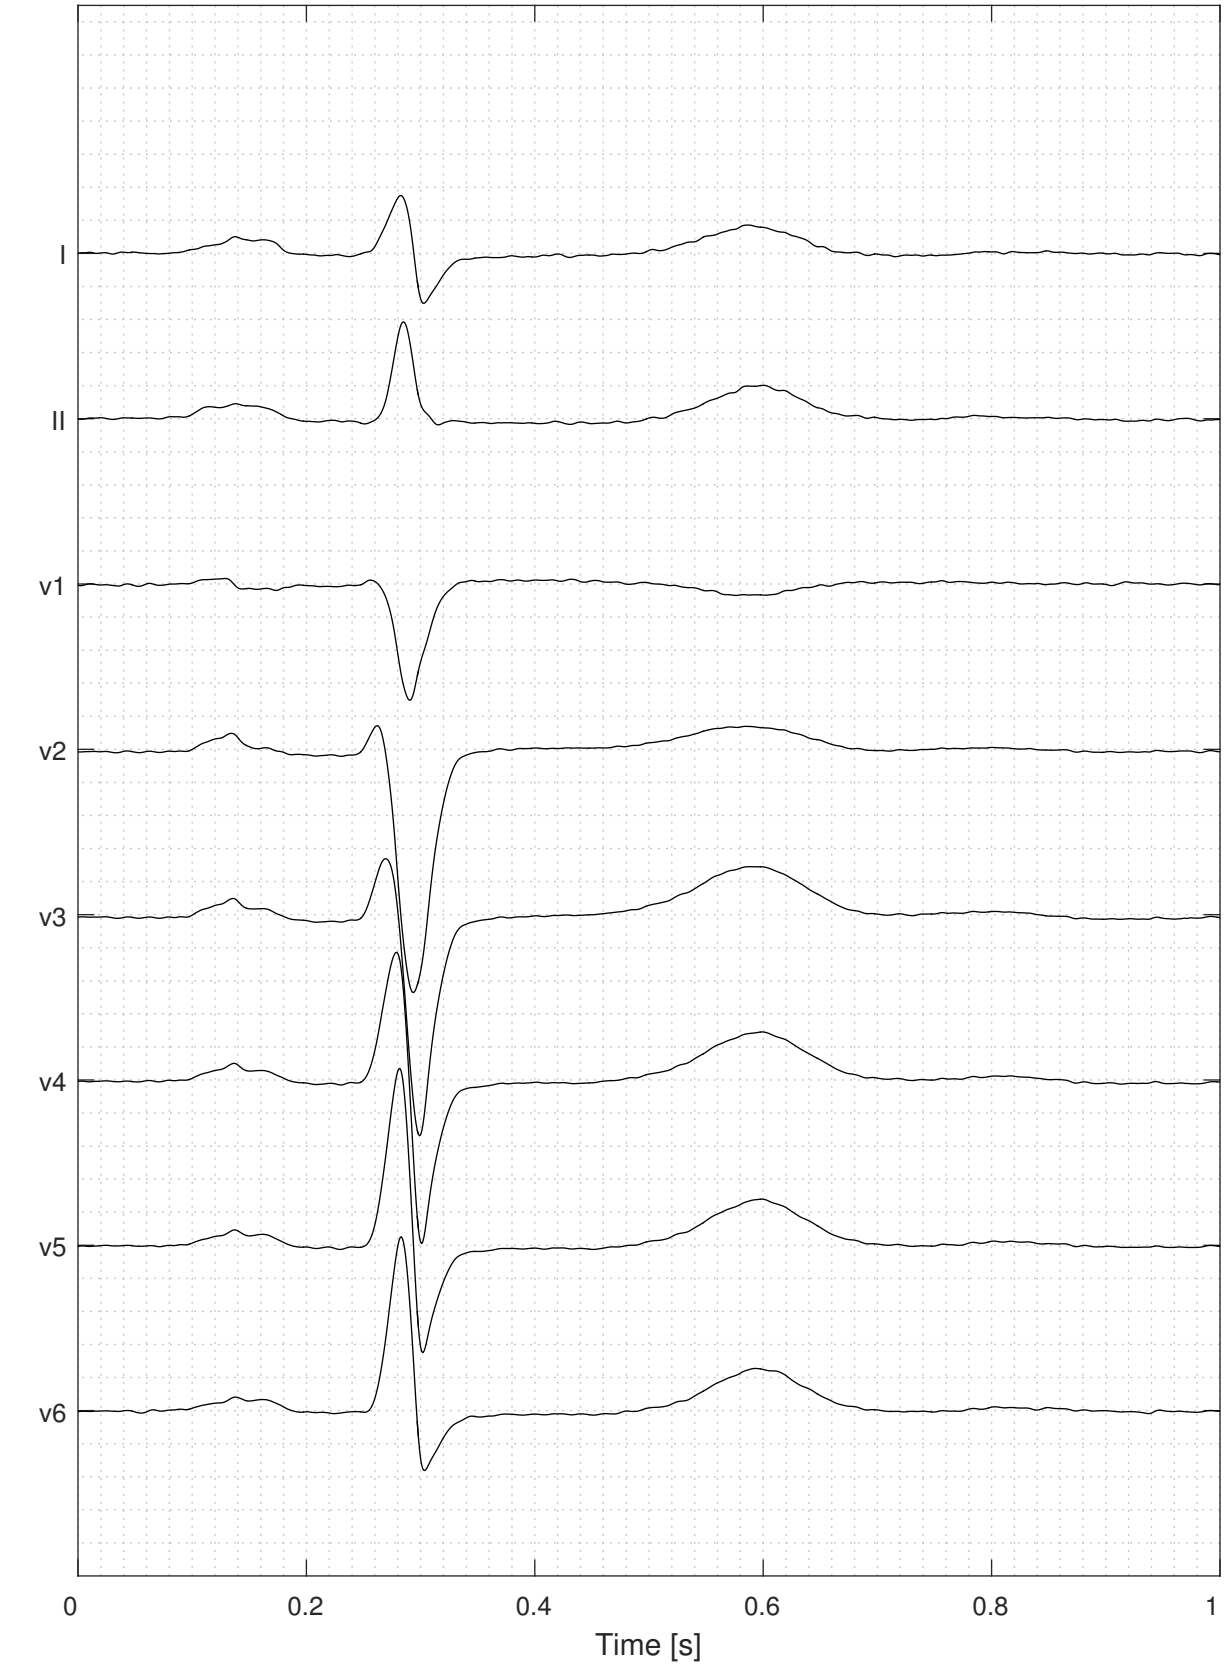

Patient 47

Low RR, Complex #: 310

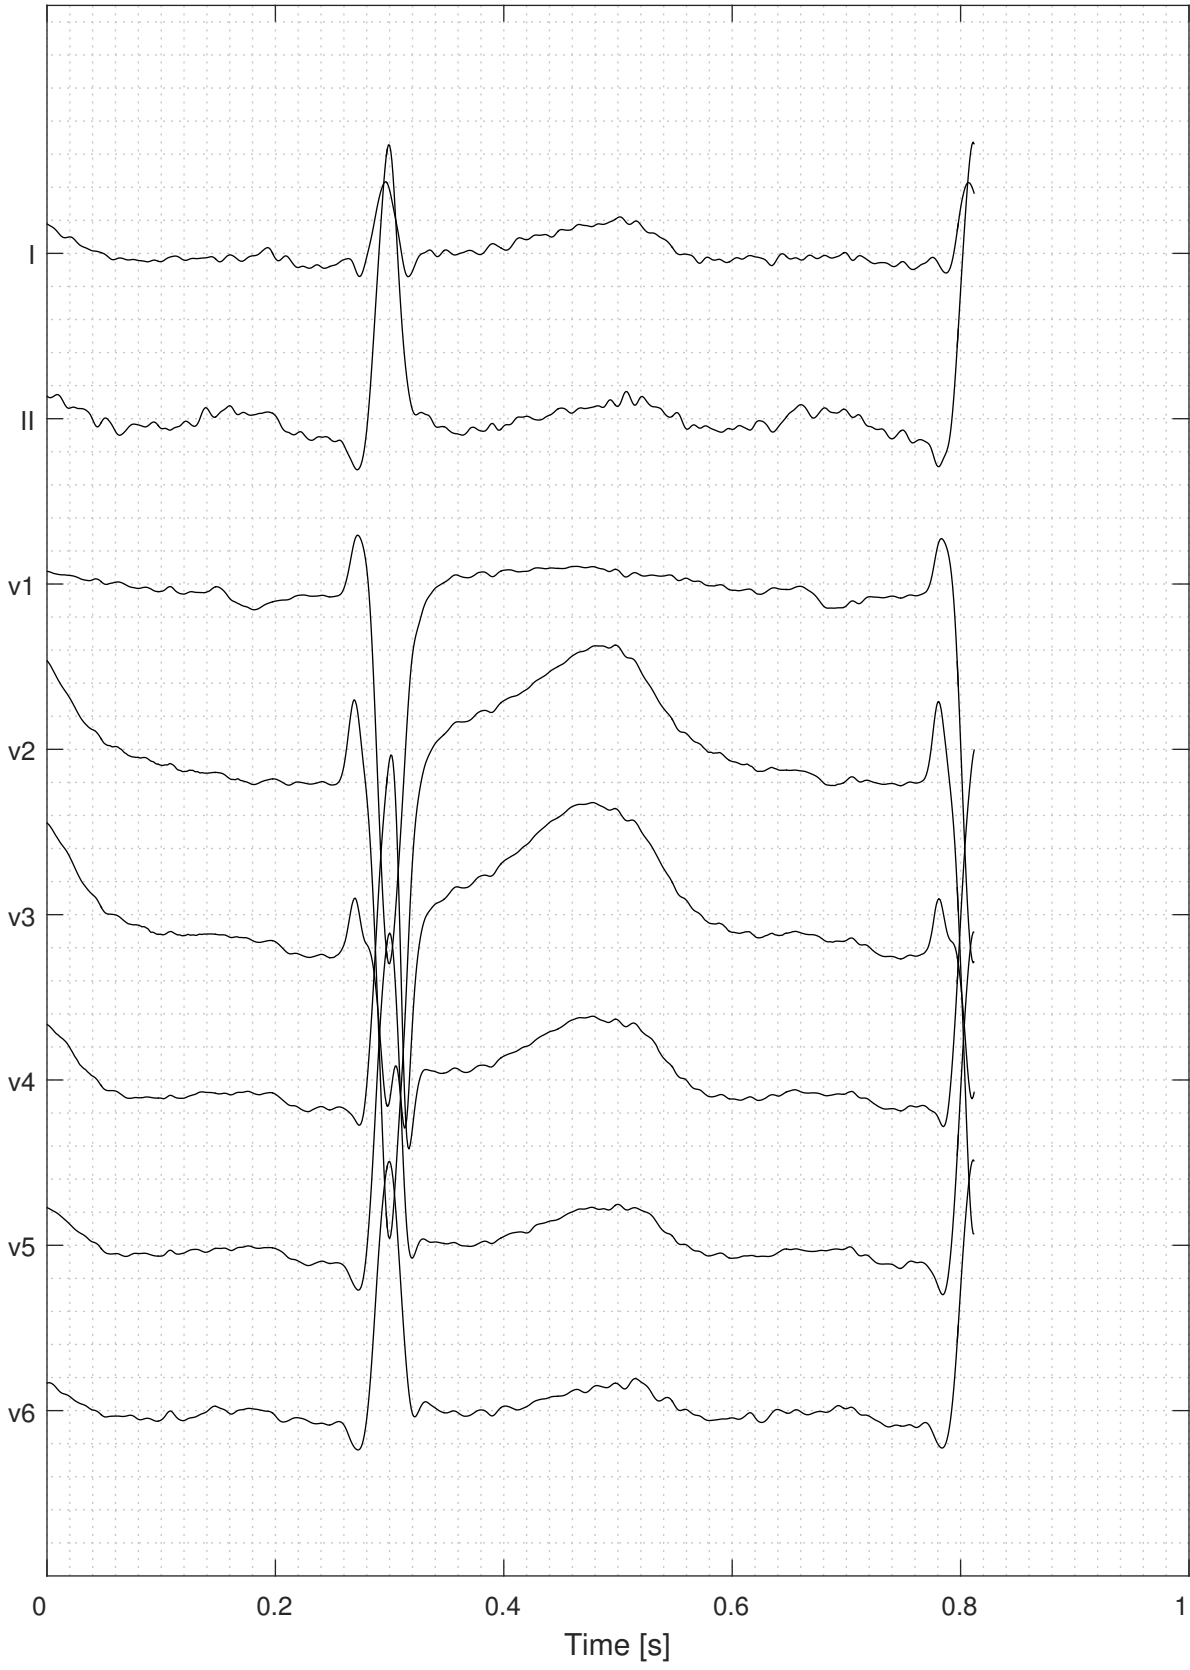

Mid RR, Complex #: 362

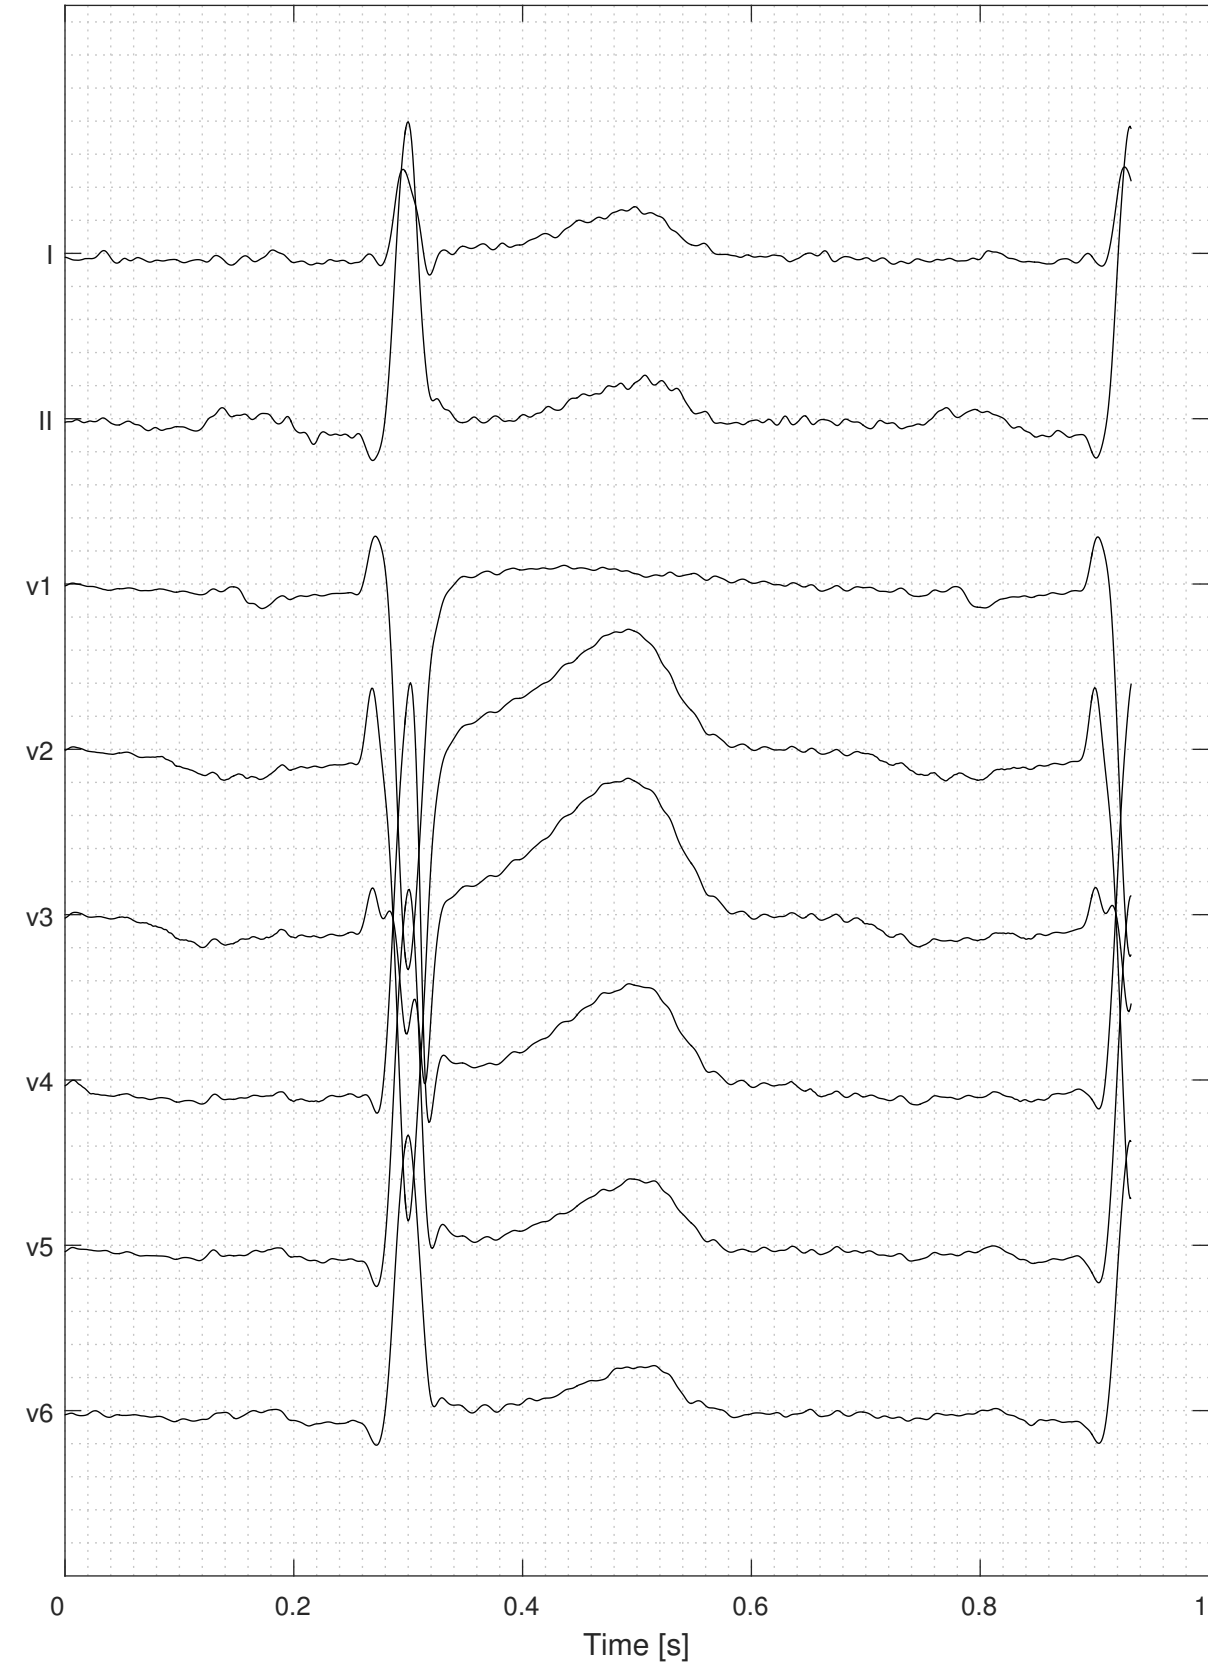

High RR, Complex #: 119

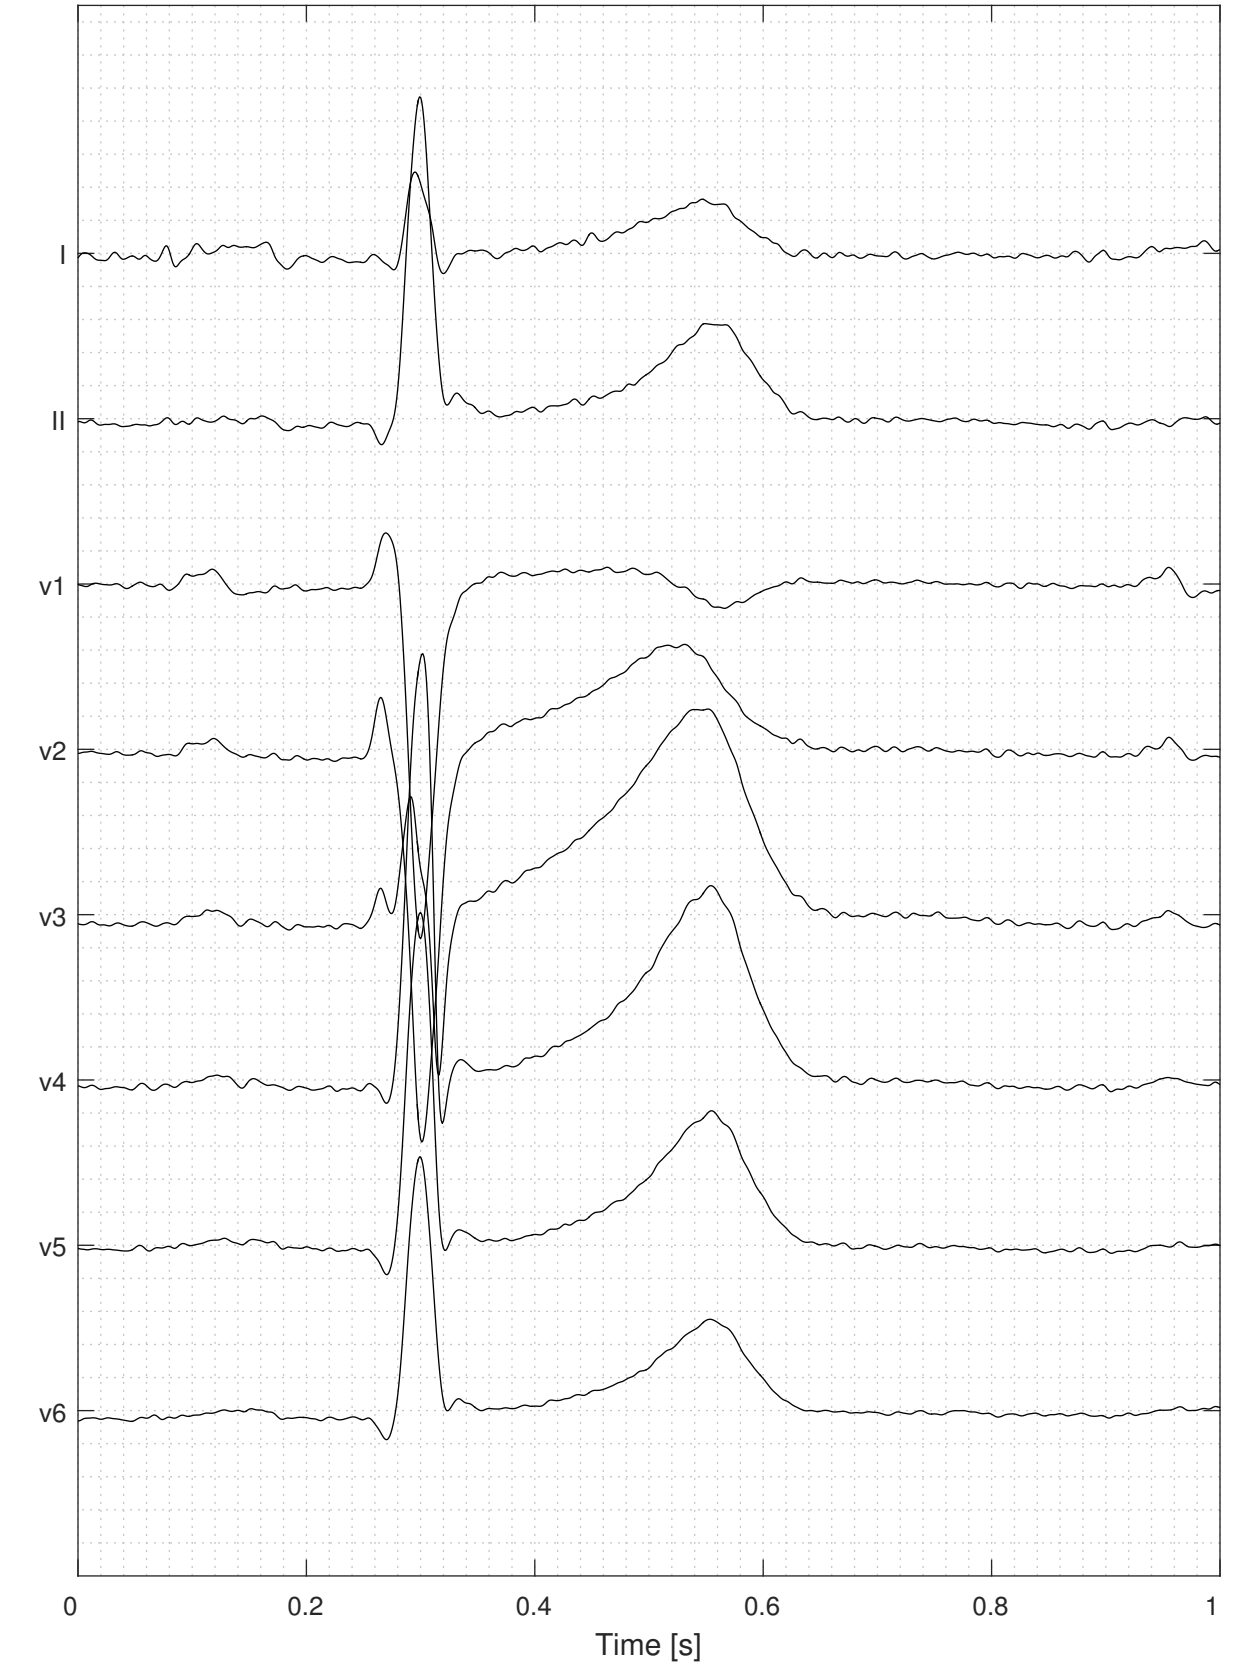

Patient 48

Low RR, Complex #: 109

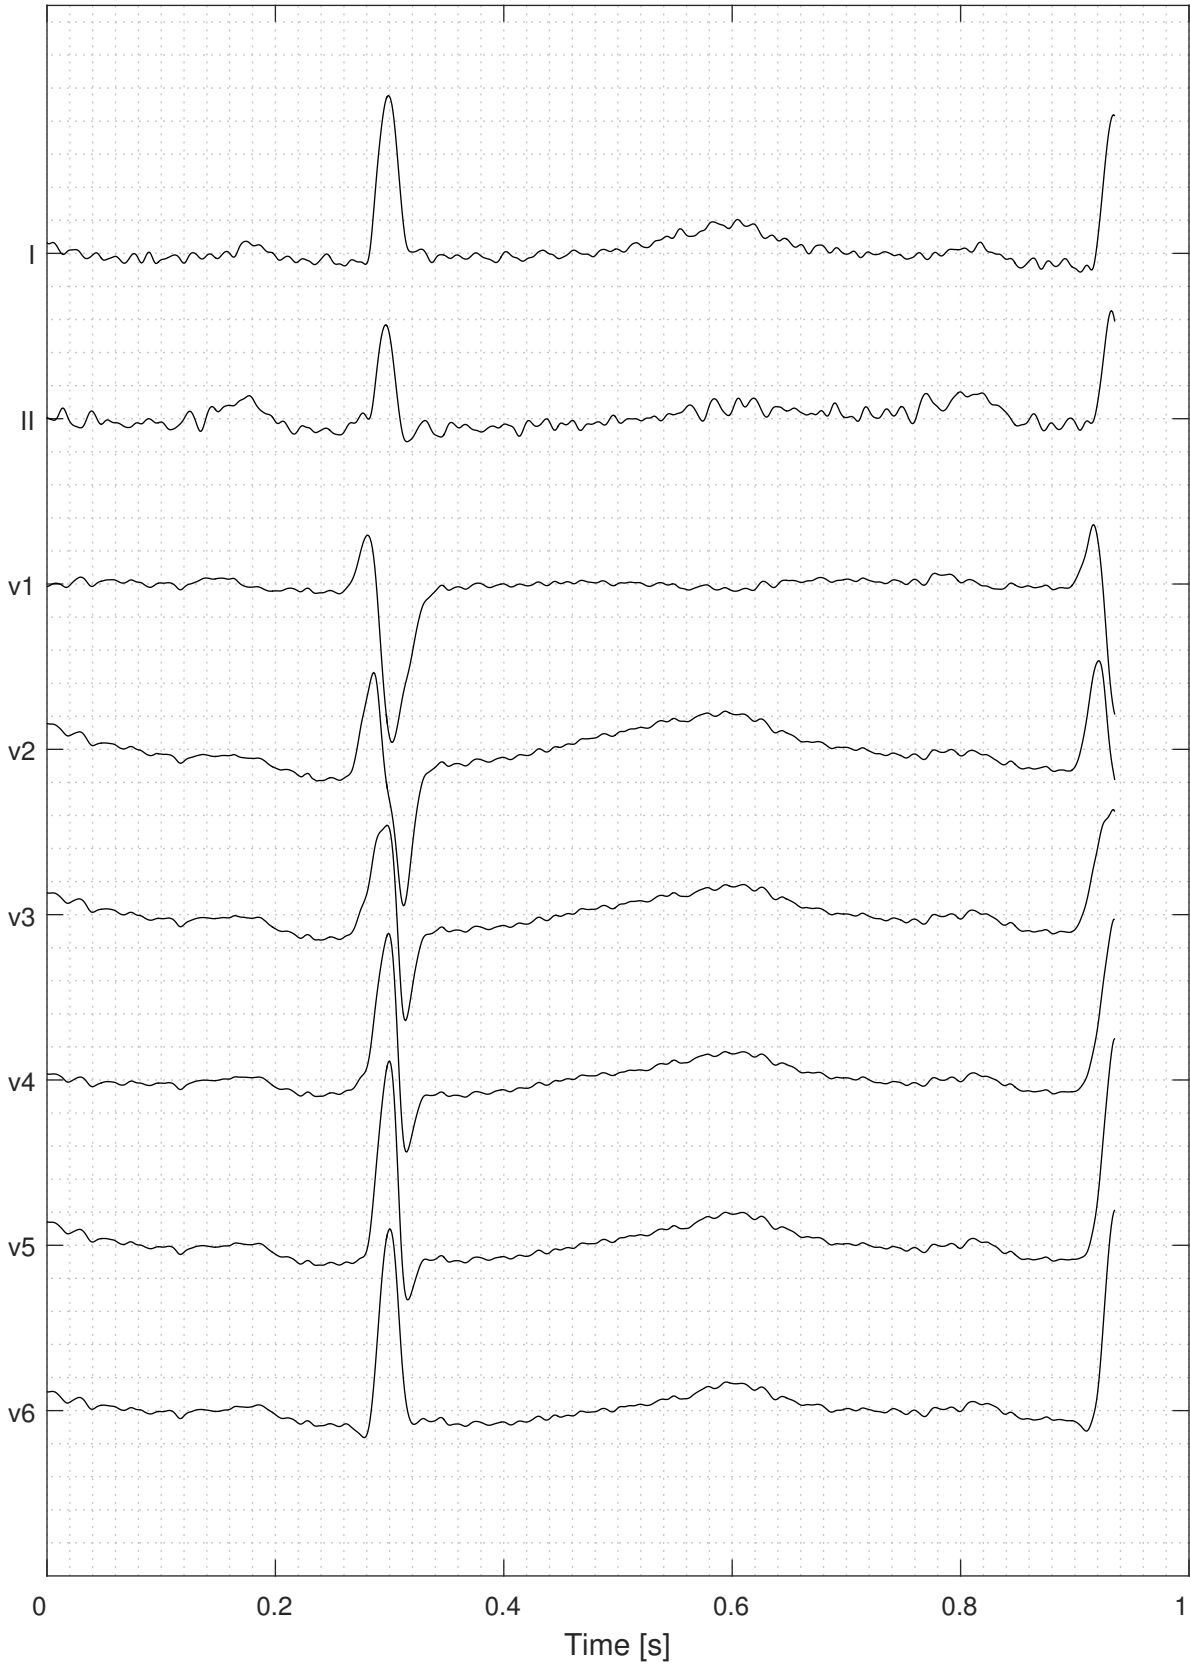

Mid RR, Complex #: 208

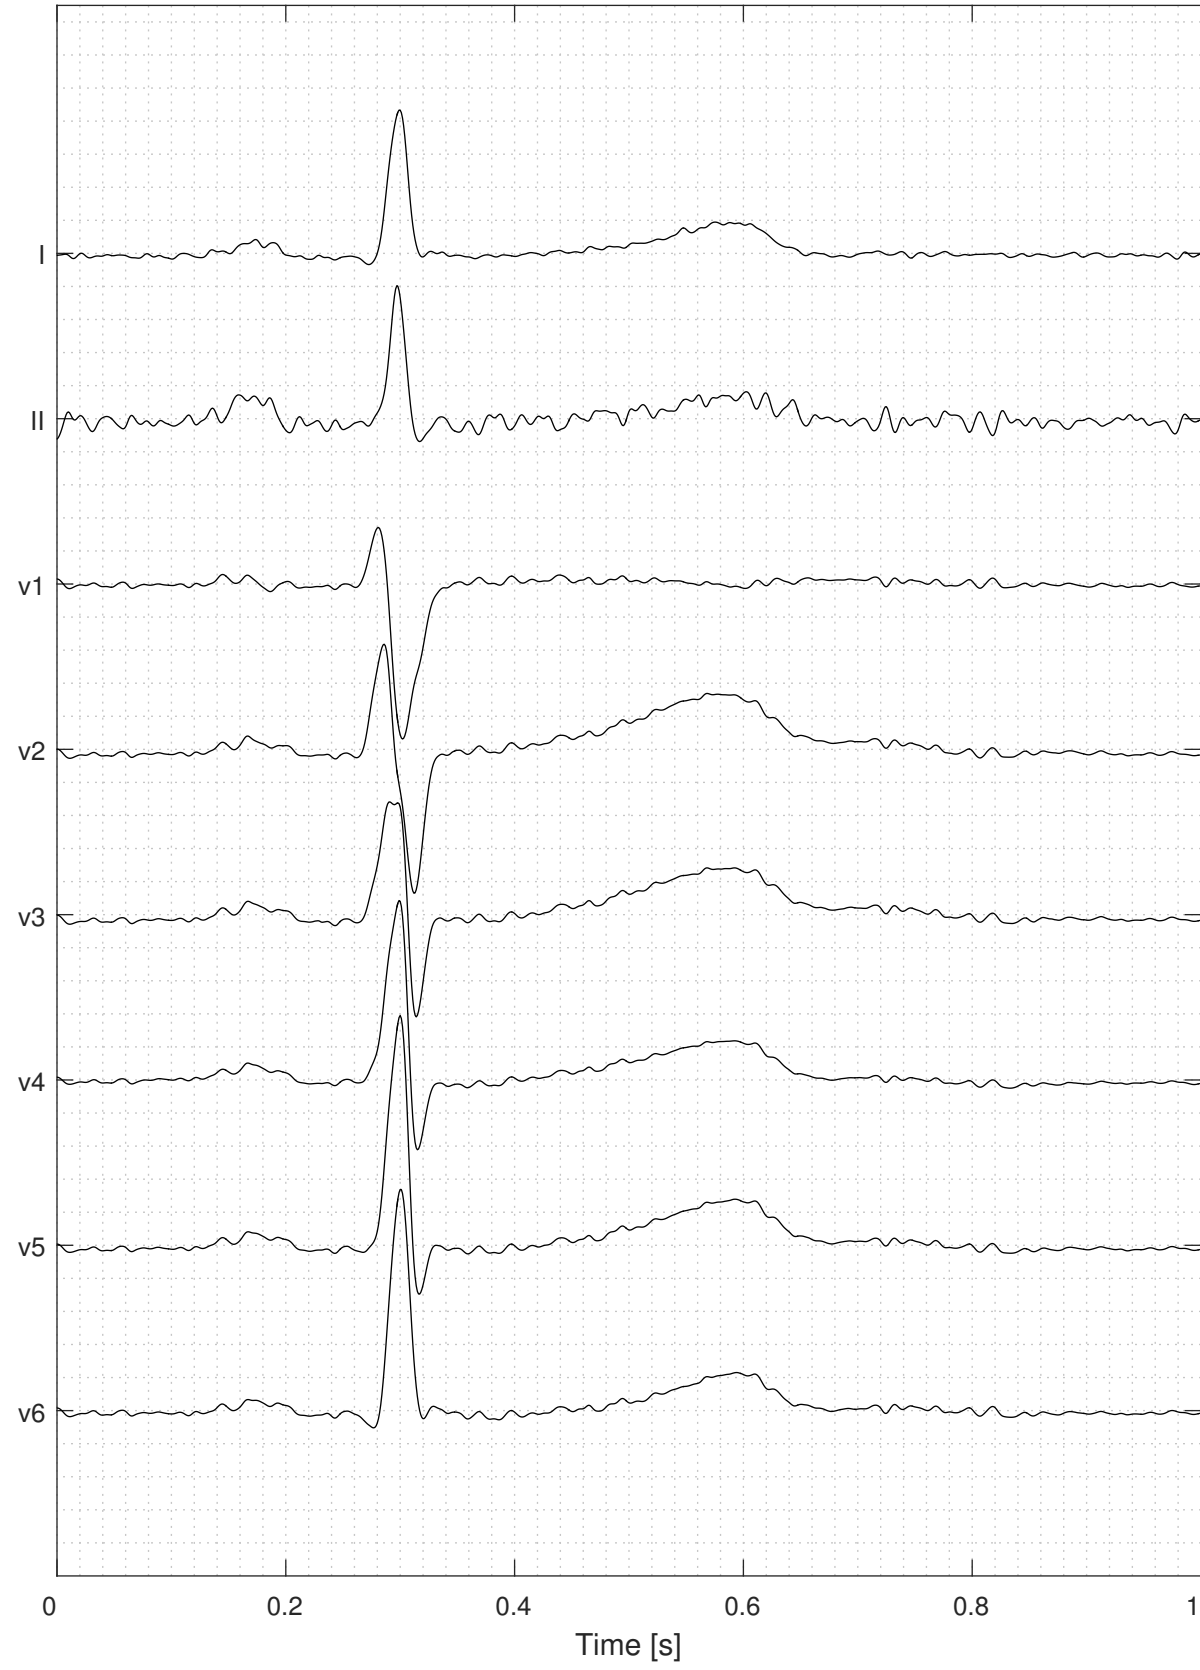

High RR, Complex #: 61

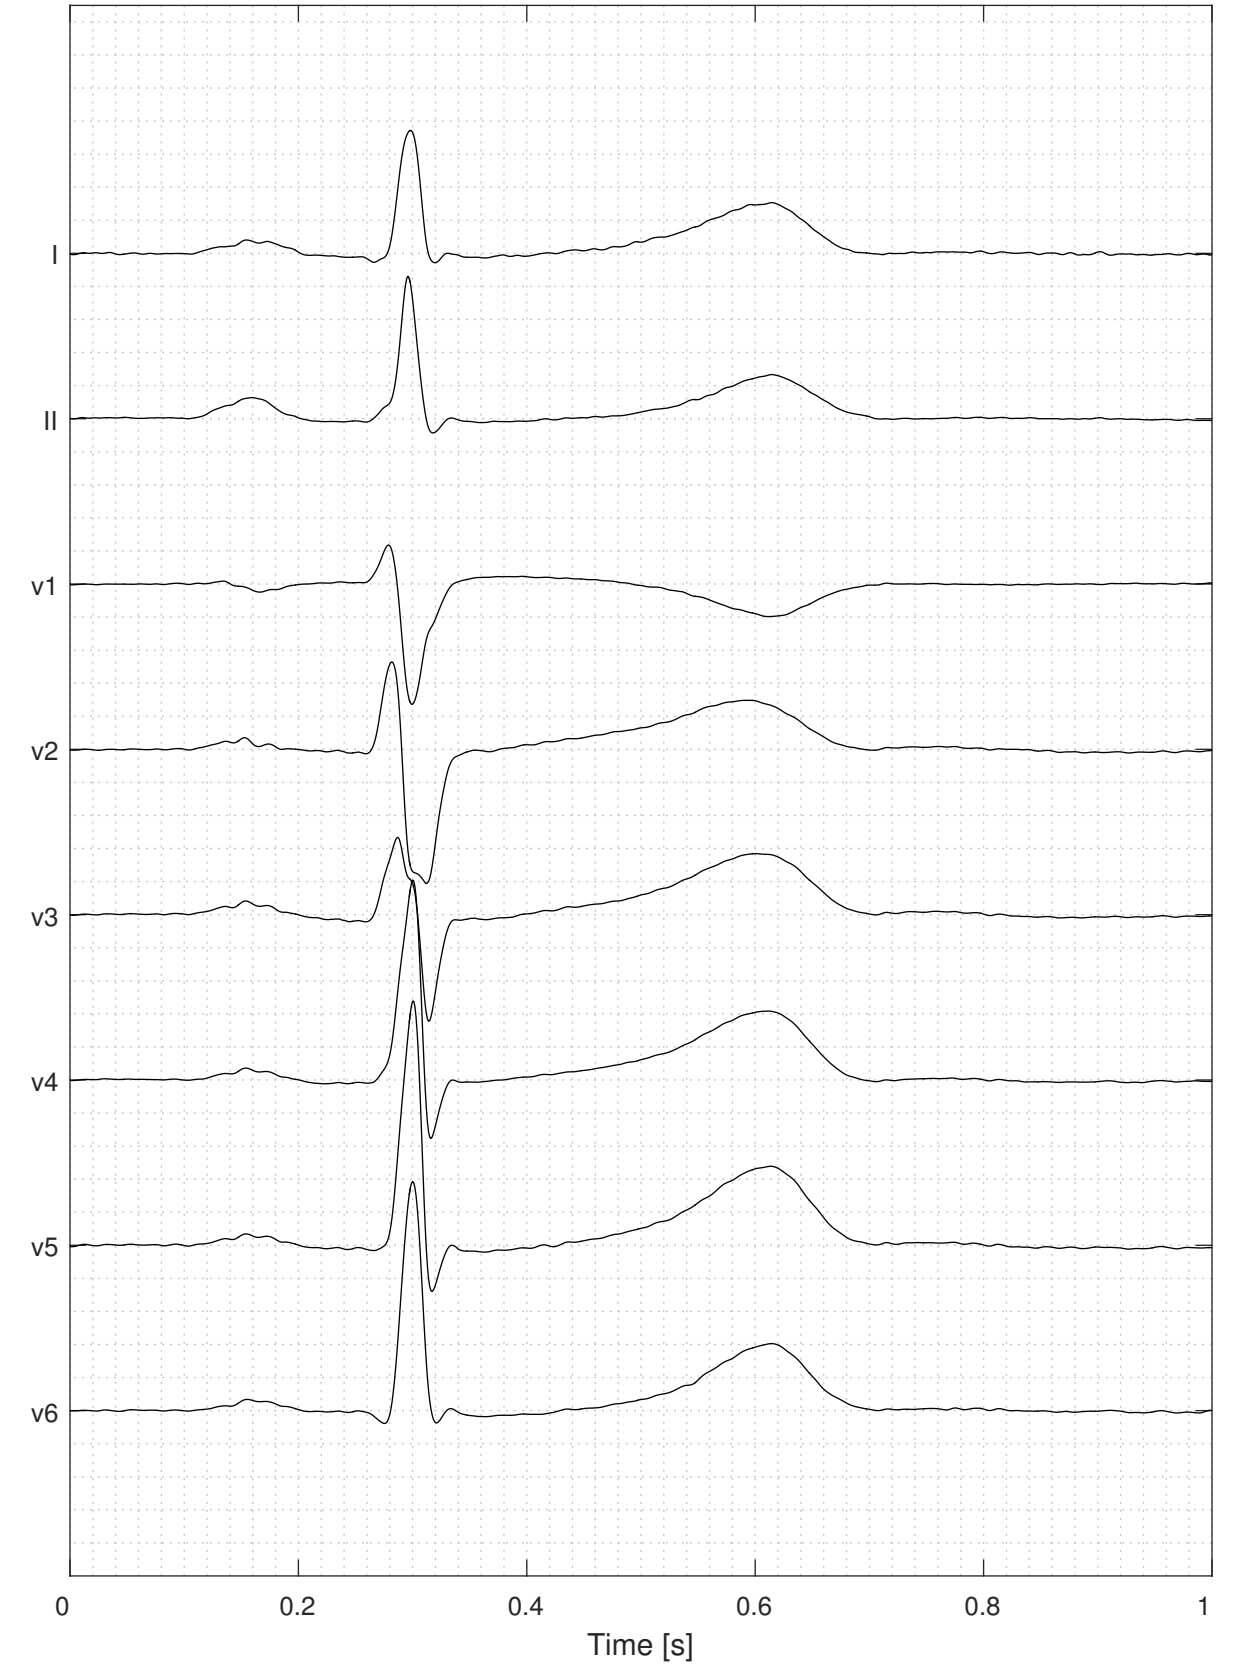



Patient 49

Low RR, Complex #: 130

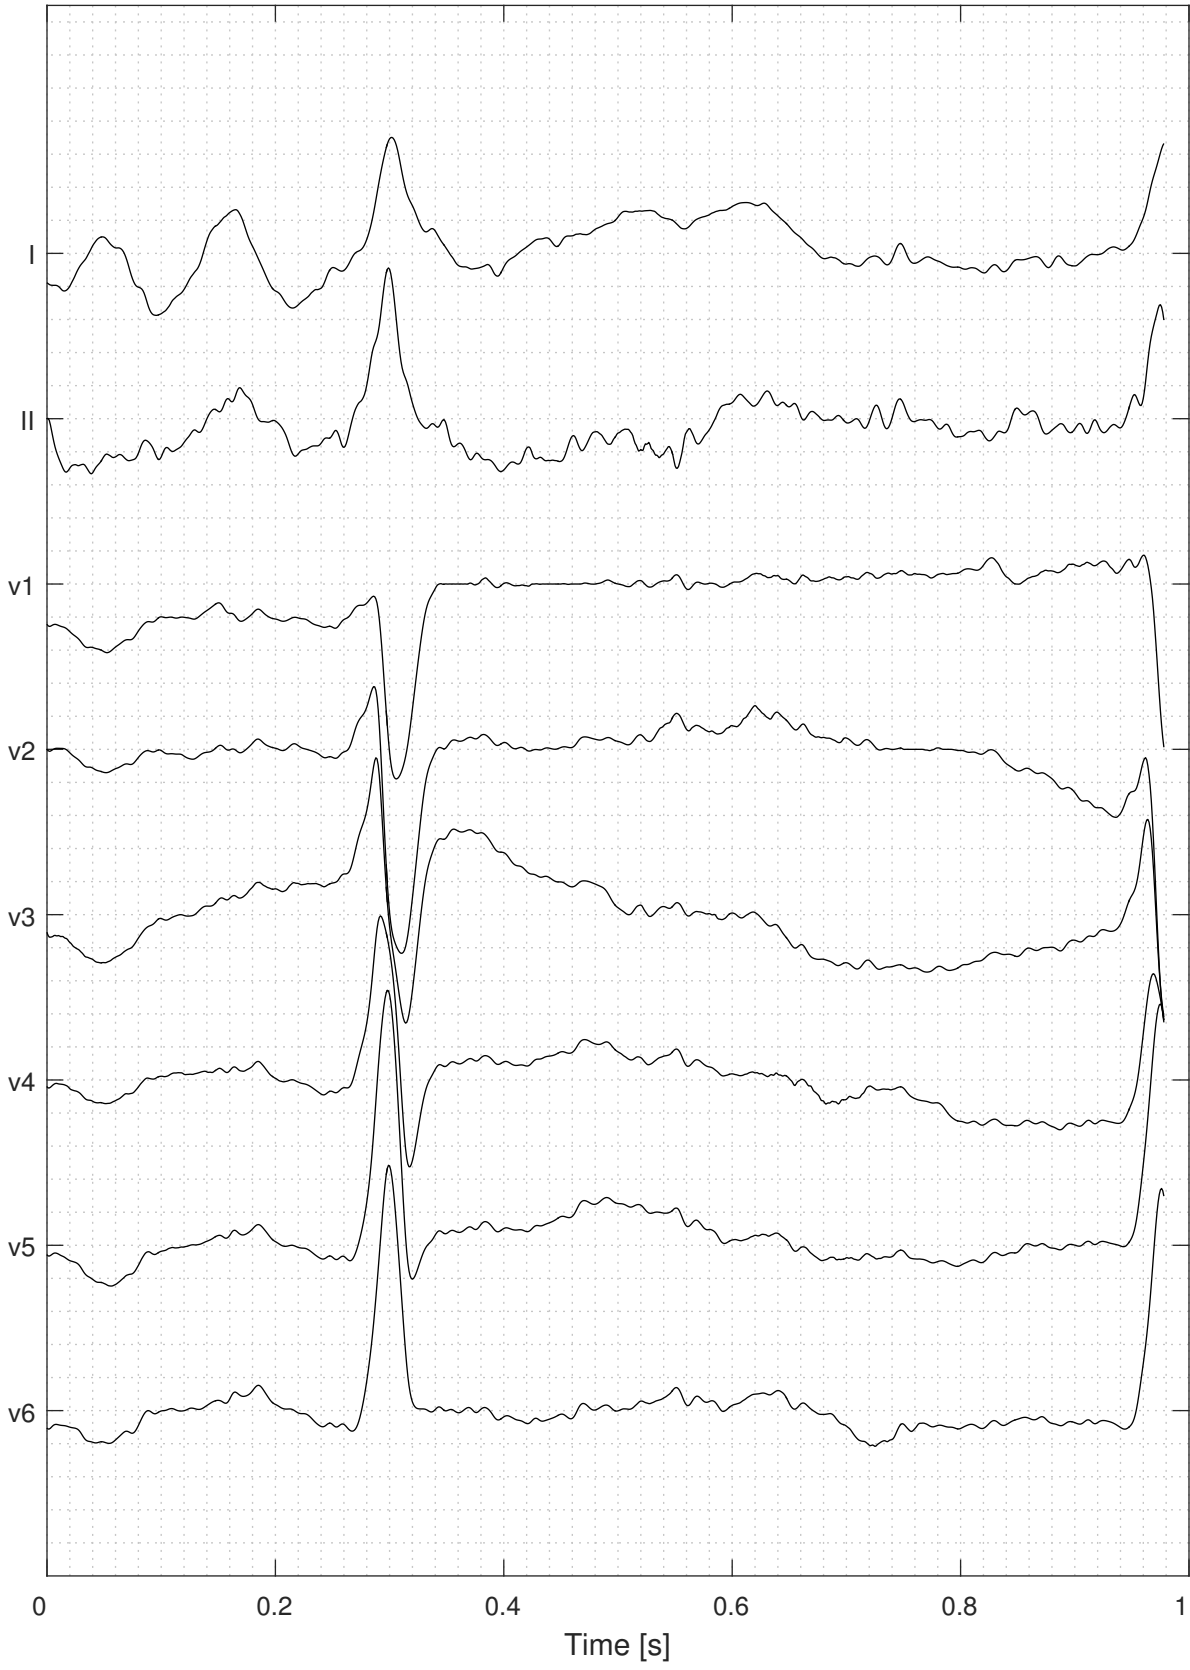

Mid RR, Complex #: 18

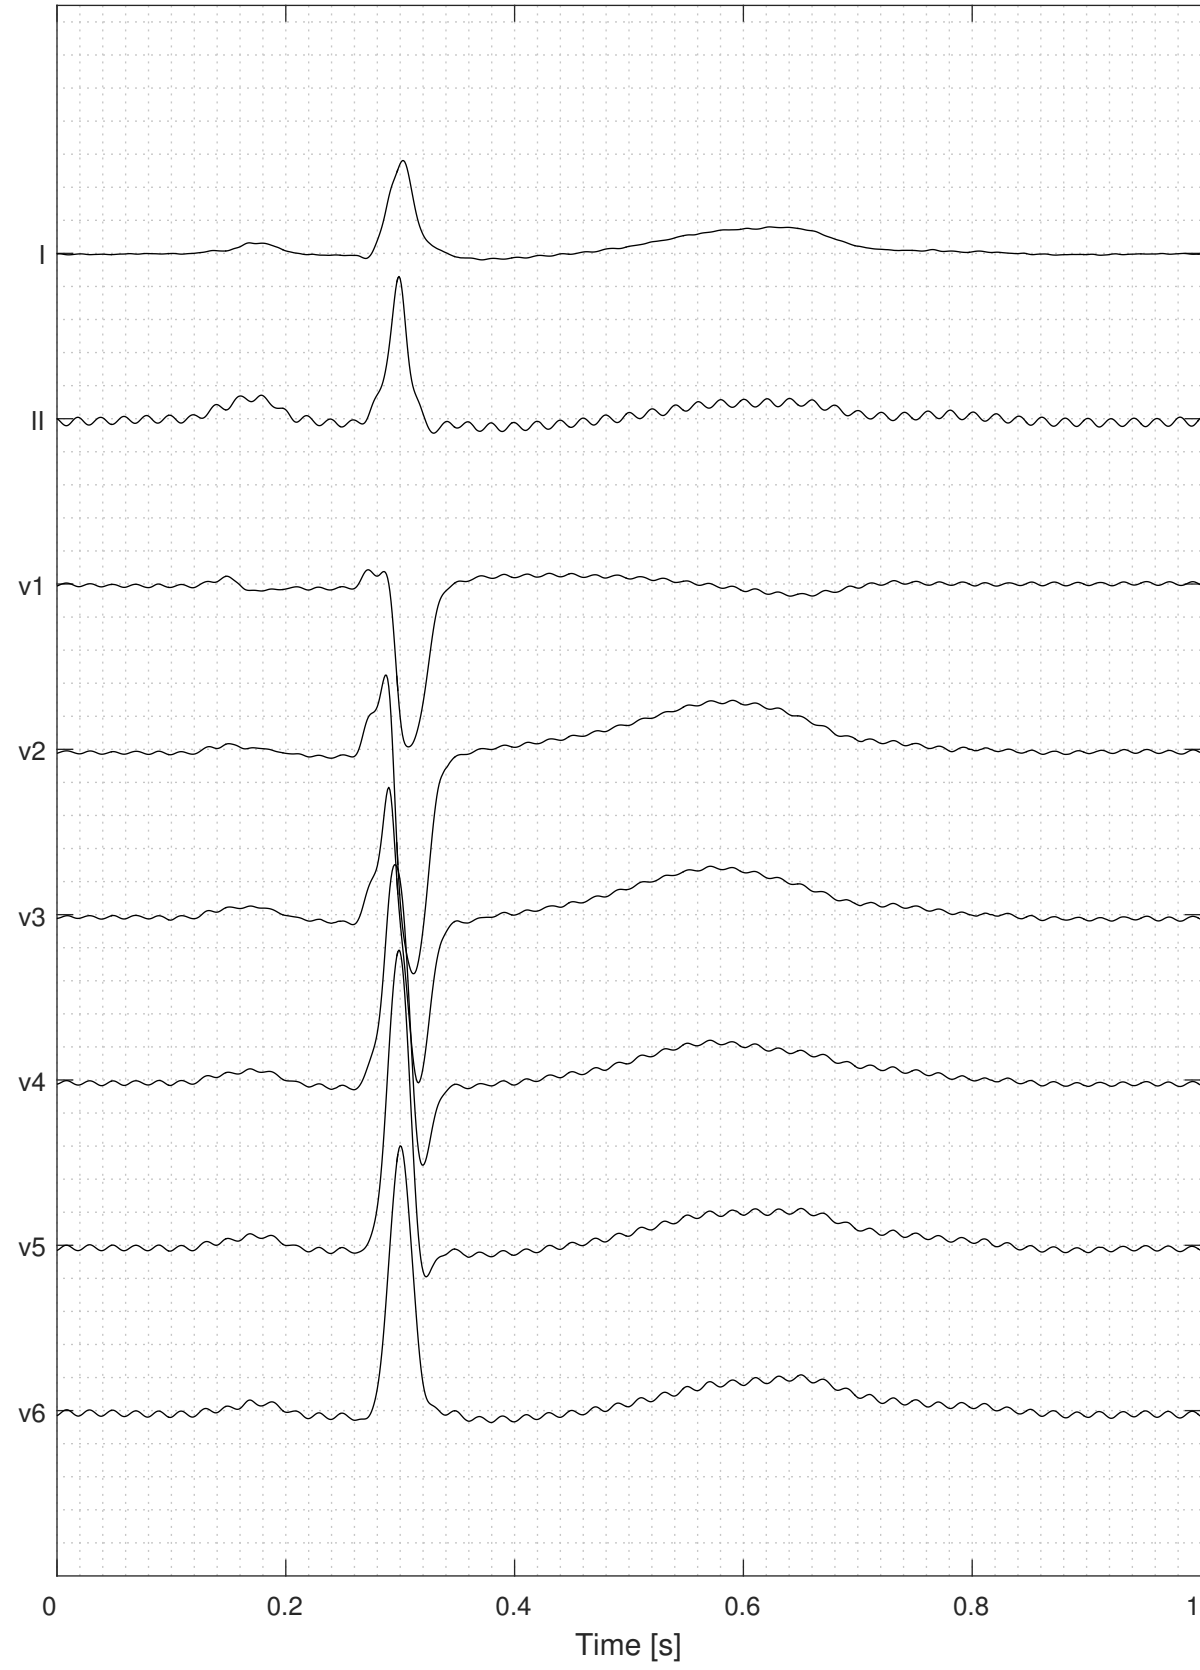

High RR, Complex #: 209

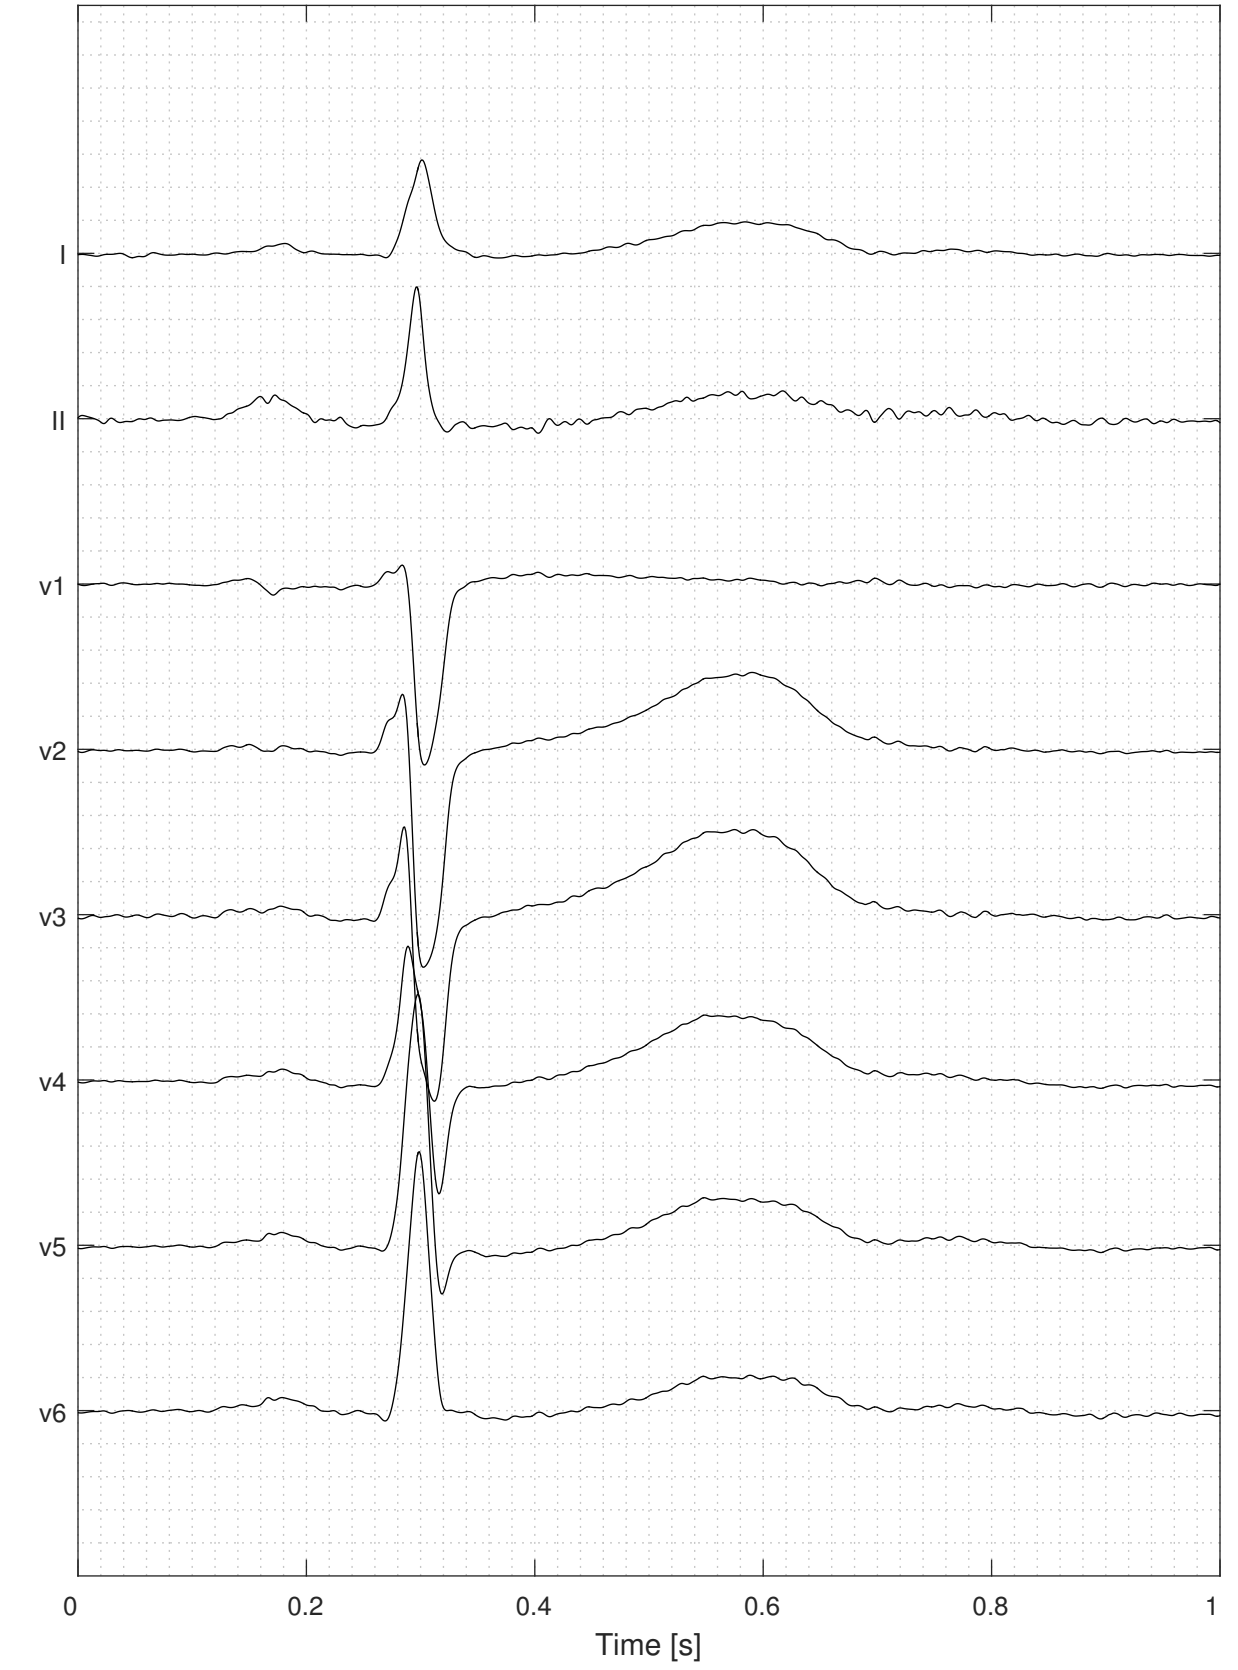

Patient 50

Low RR, Complex #: 144

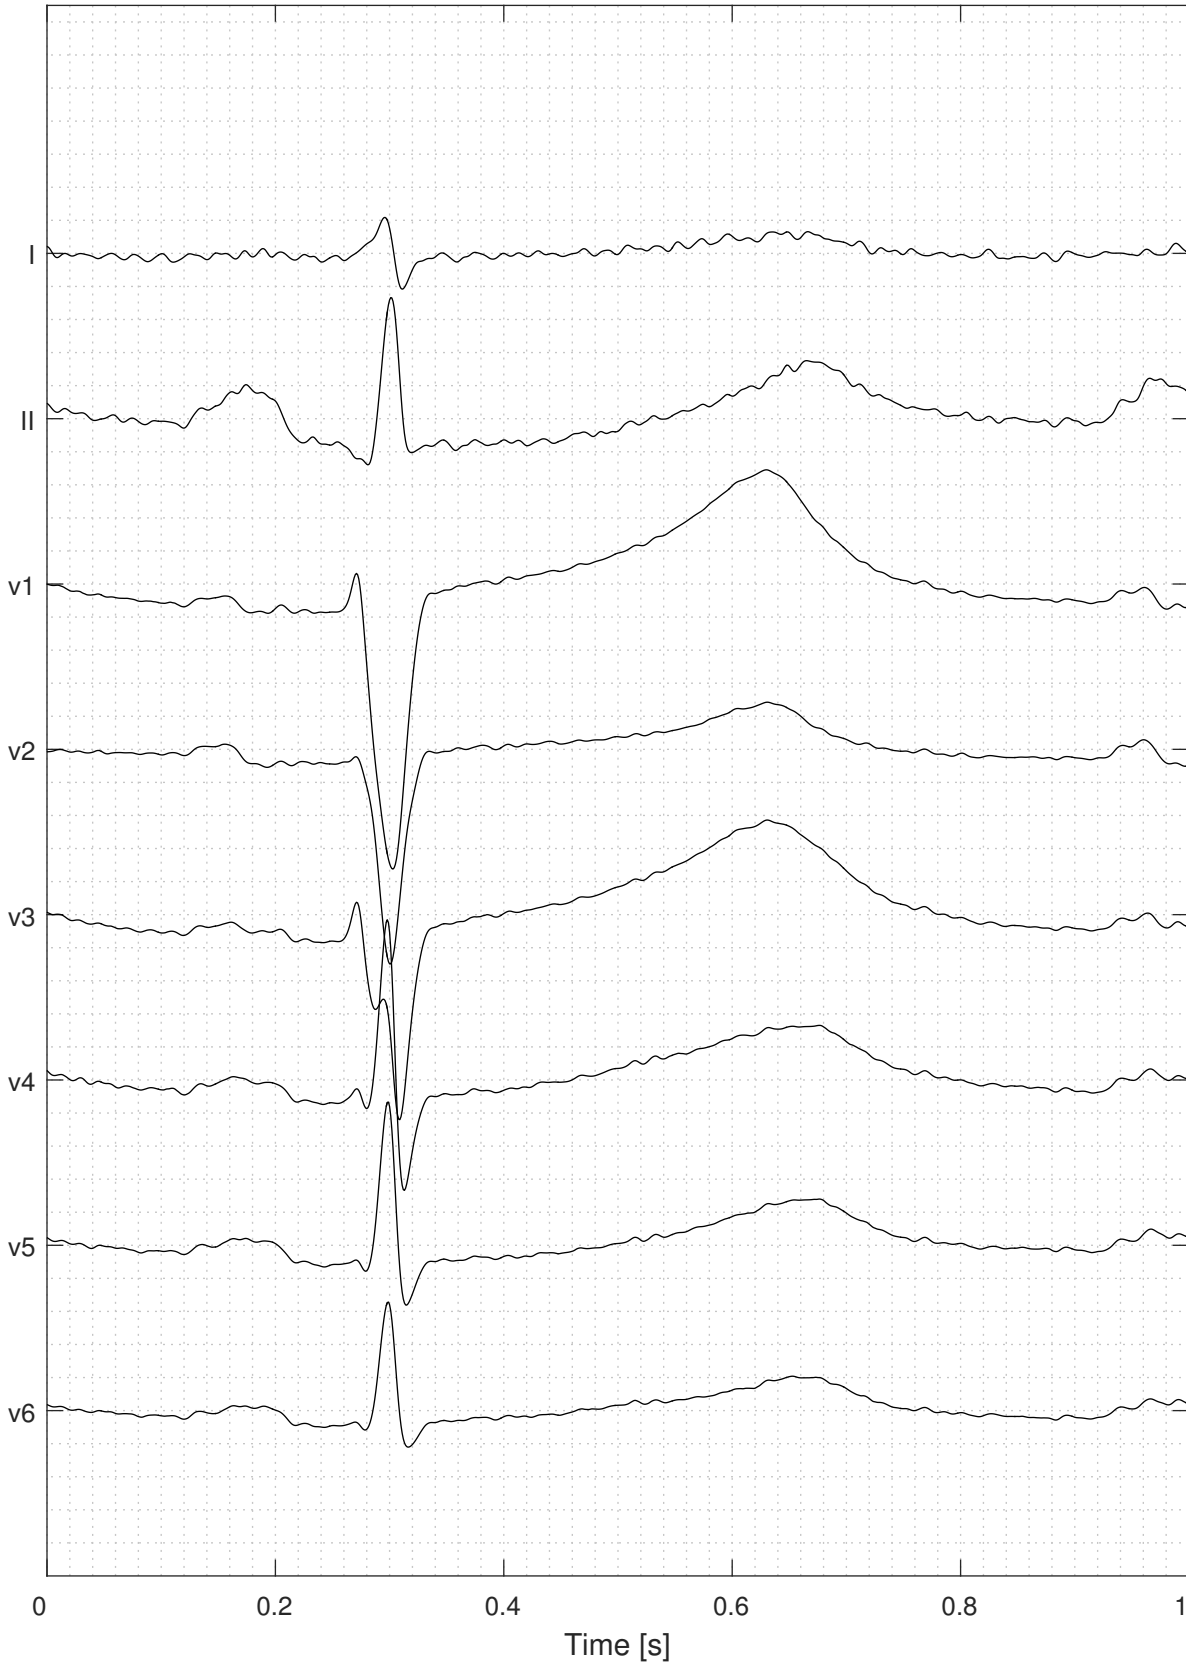

Mid RR, Complex #: 226

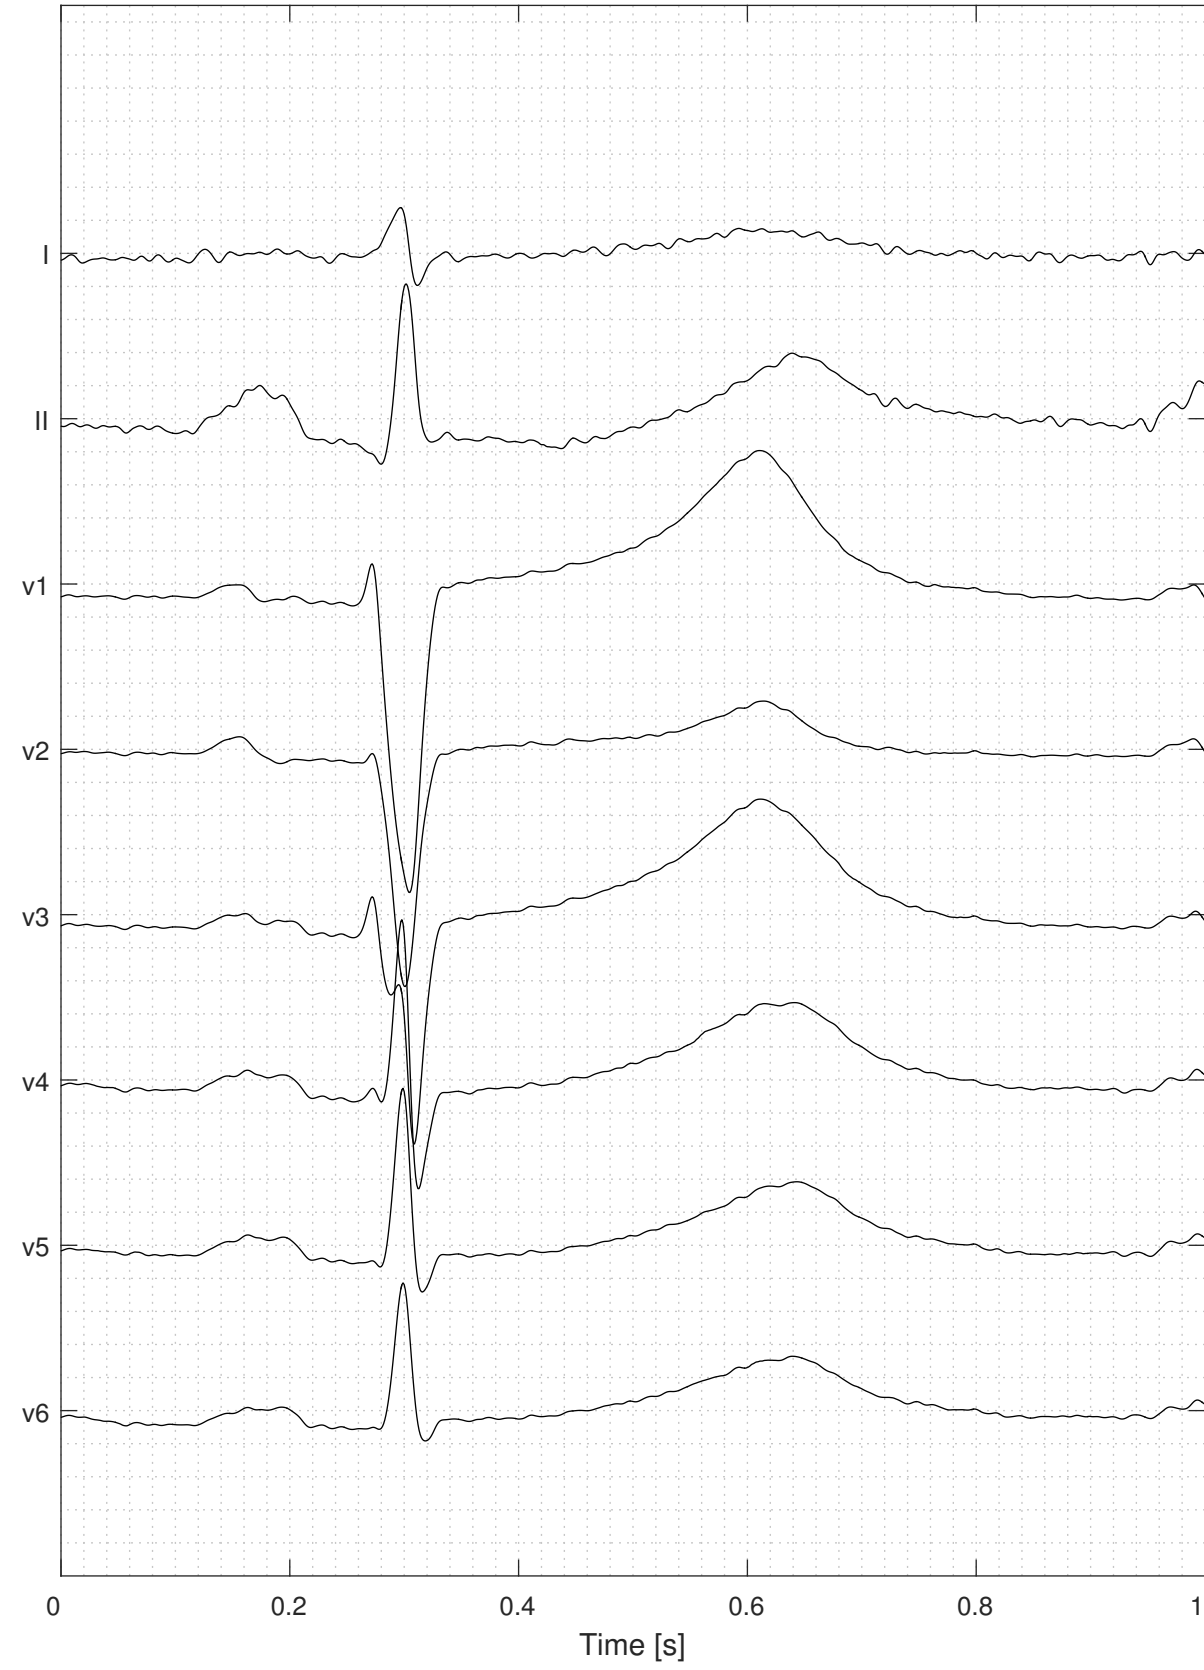

High RR, Complex #: 53

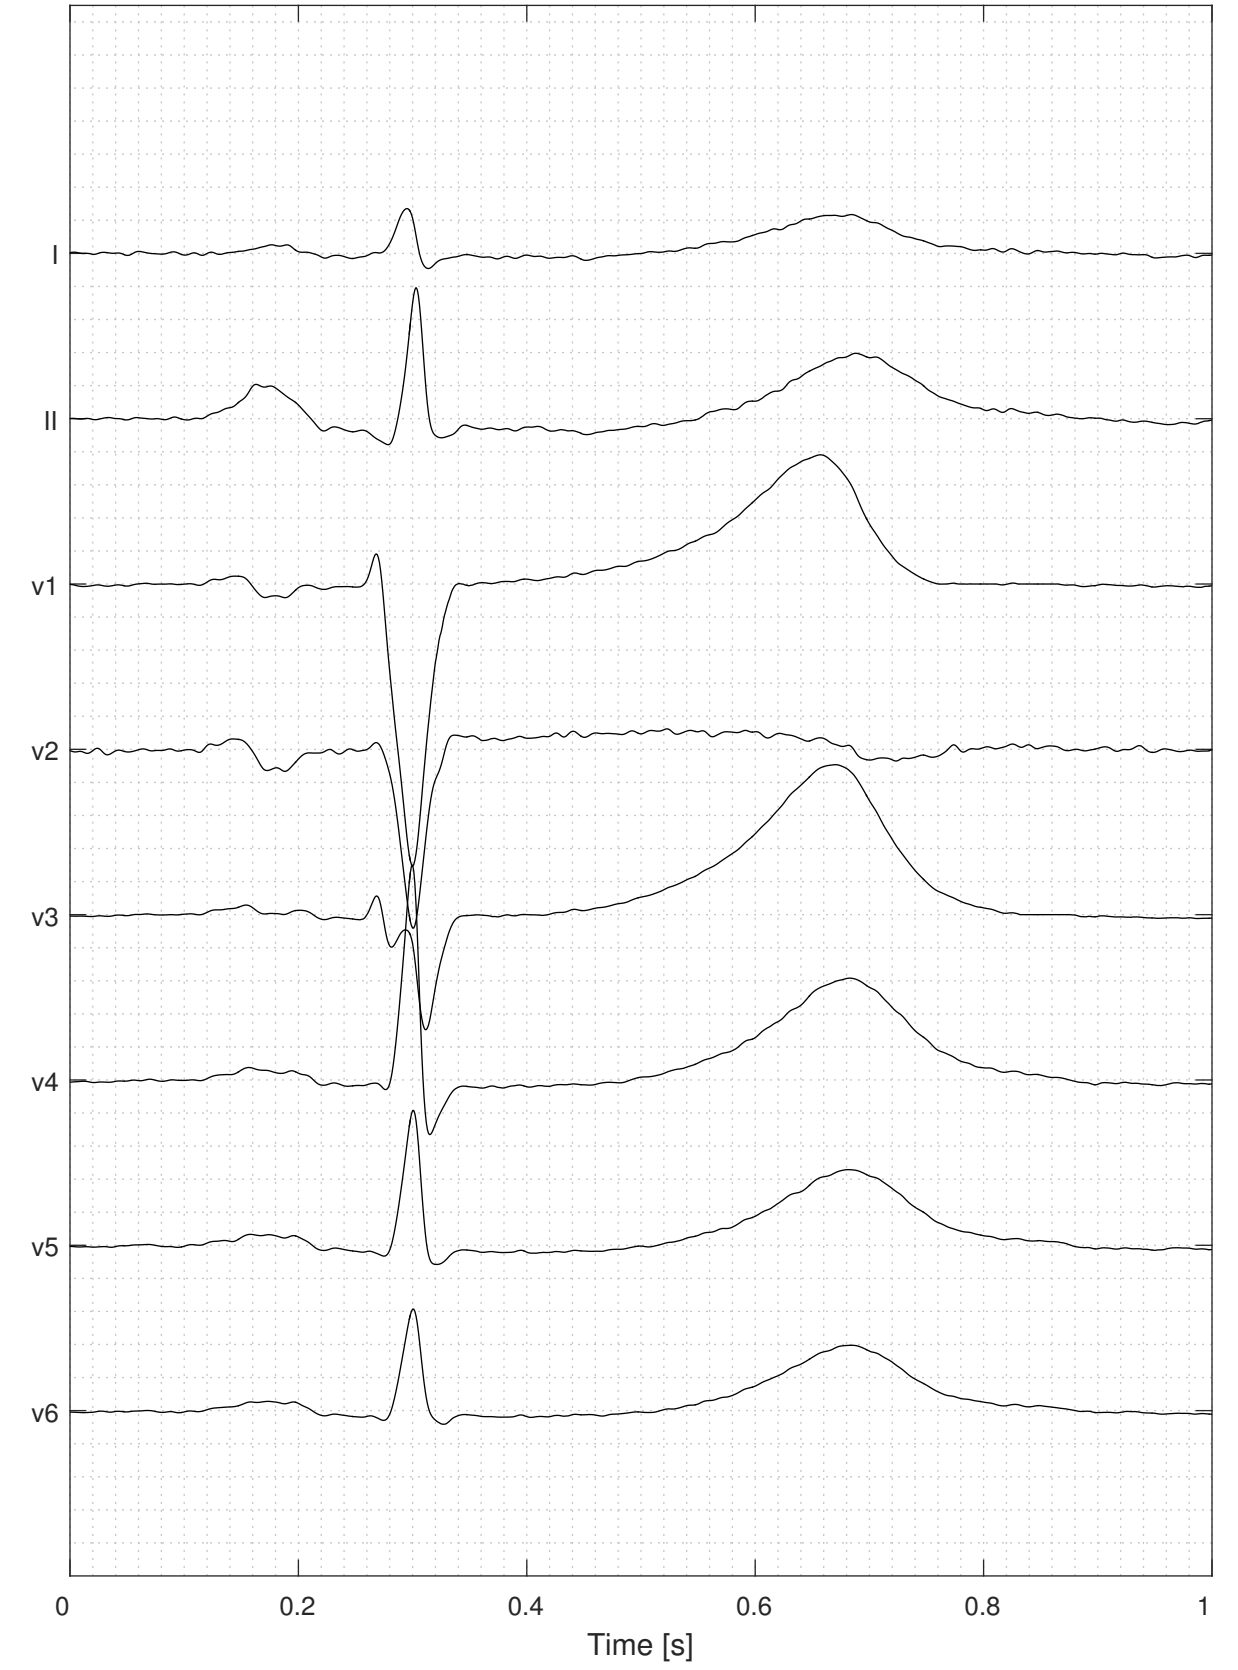

Patient 51

Low RR, Complex #: 151

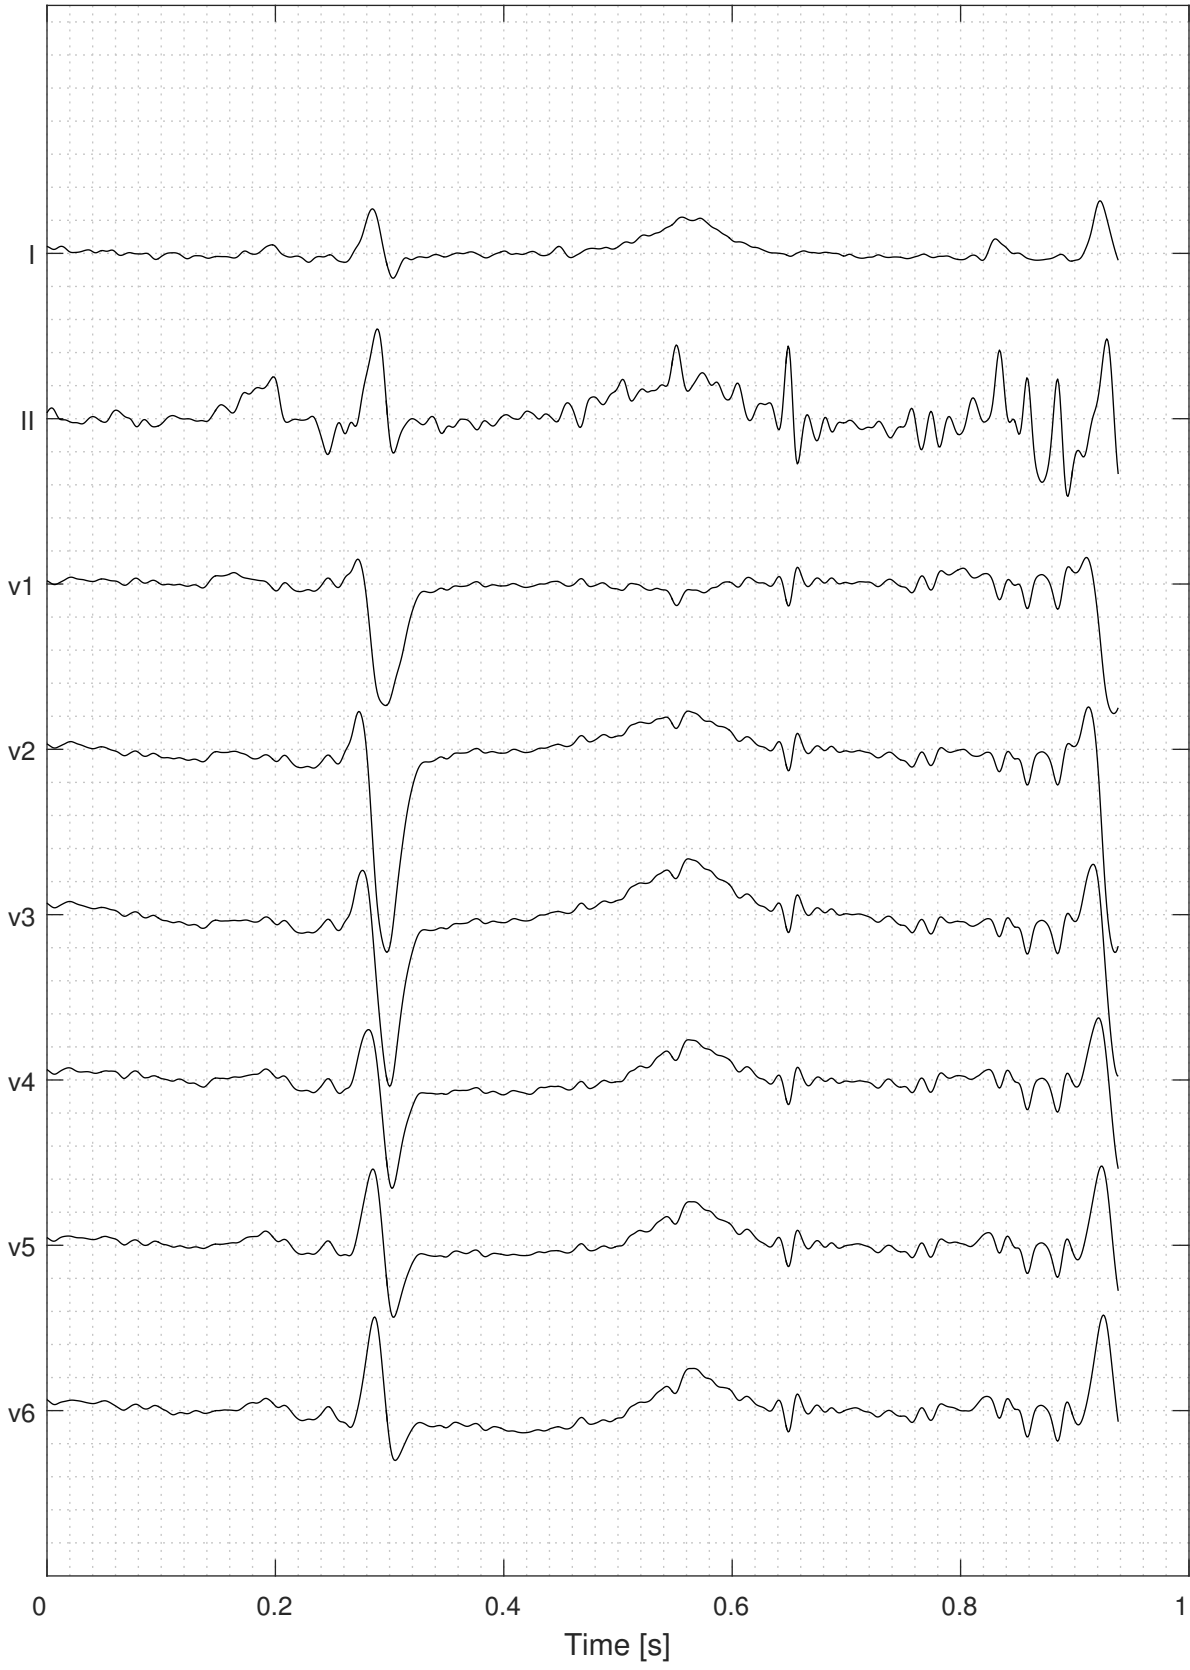

Mid RR, Complex #: 93

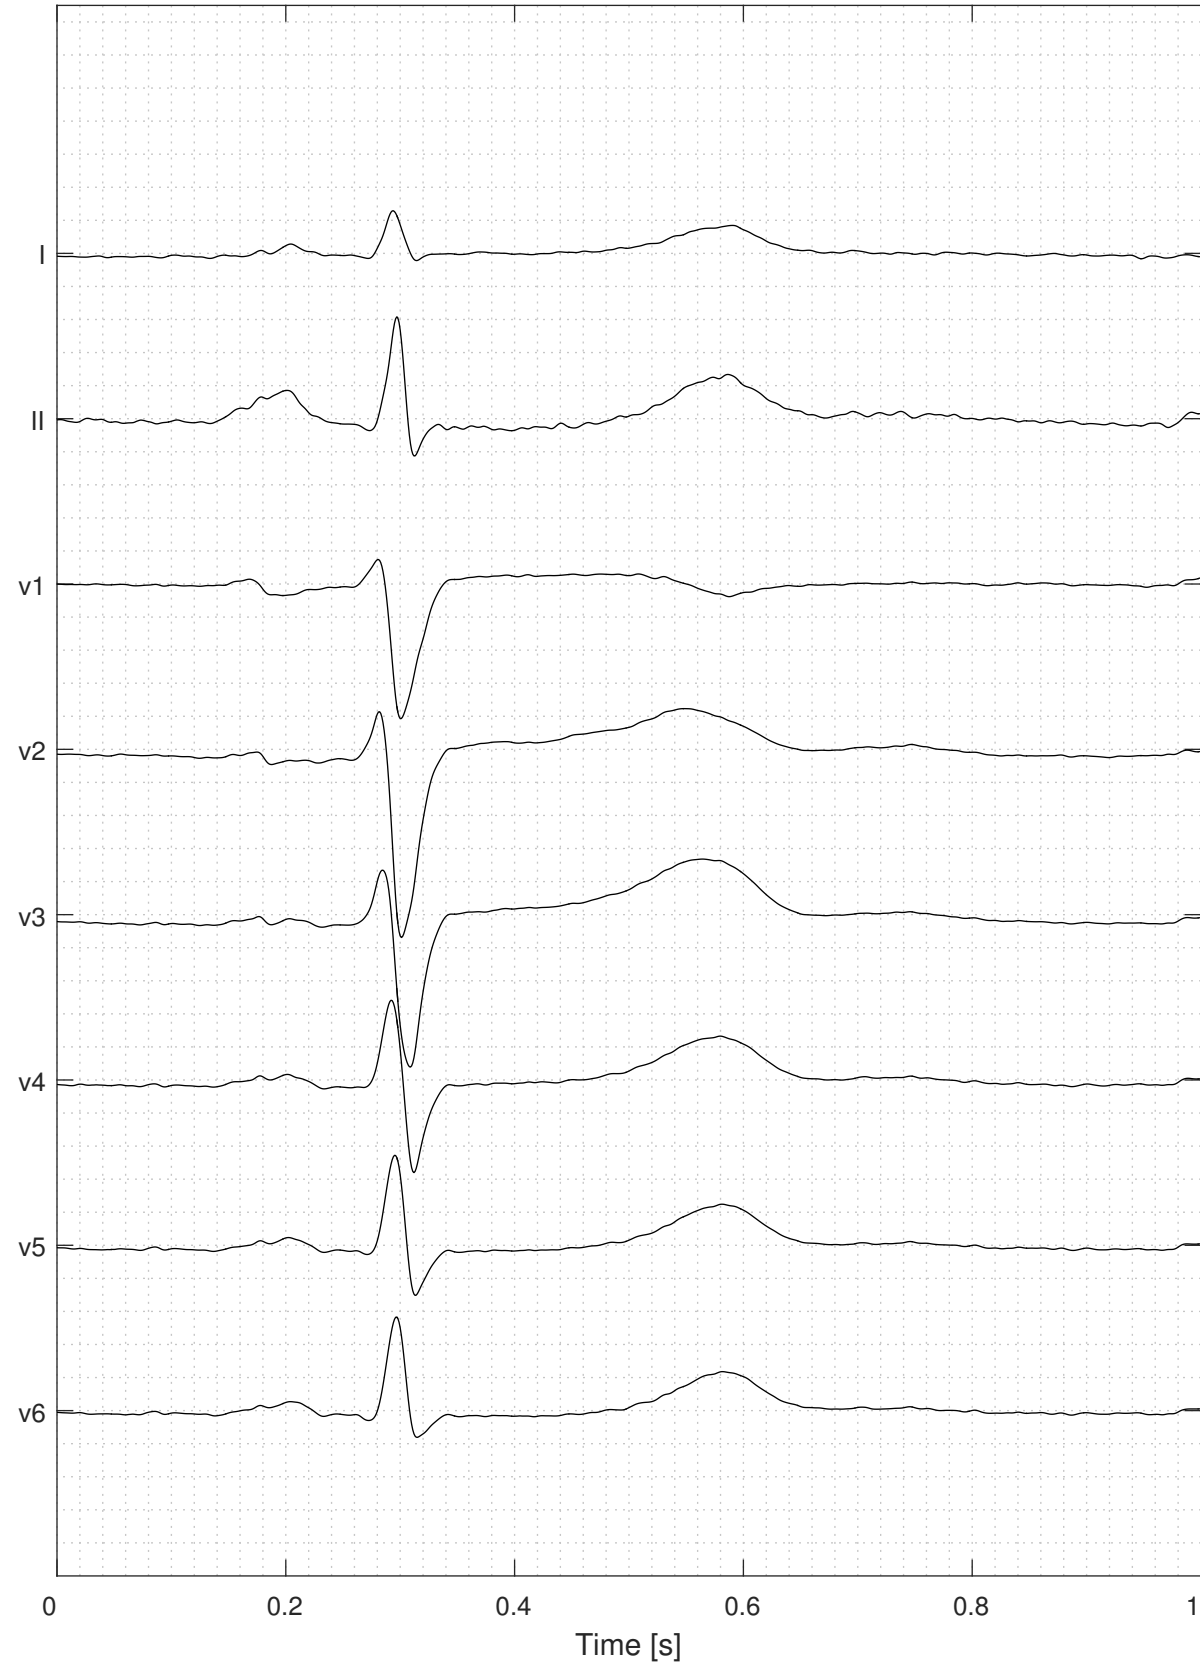

High RR, Complex #: 48

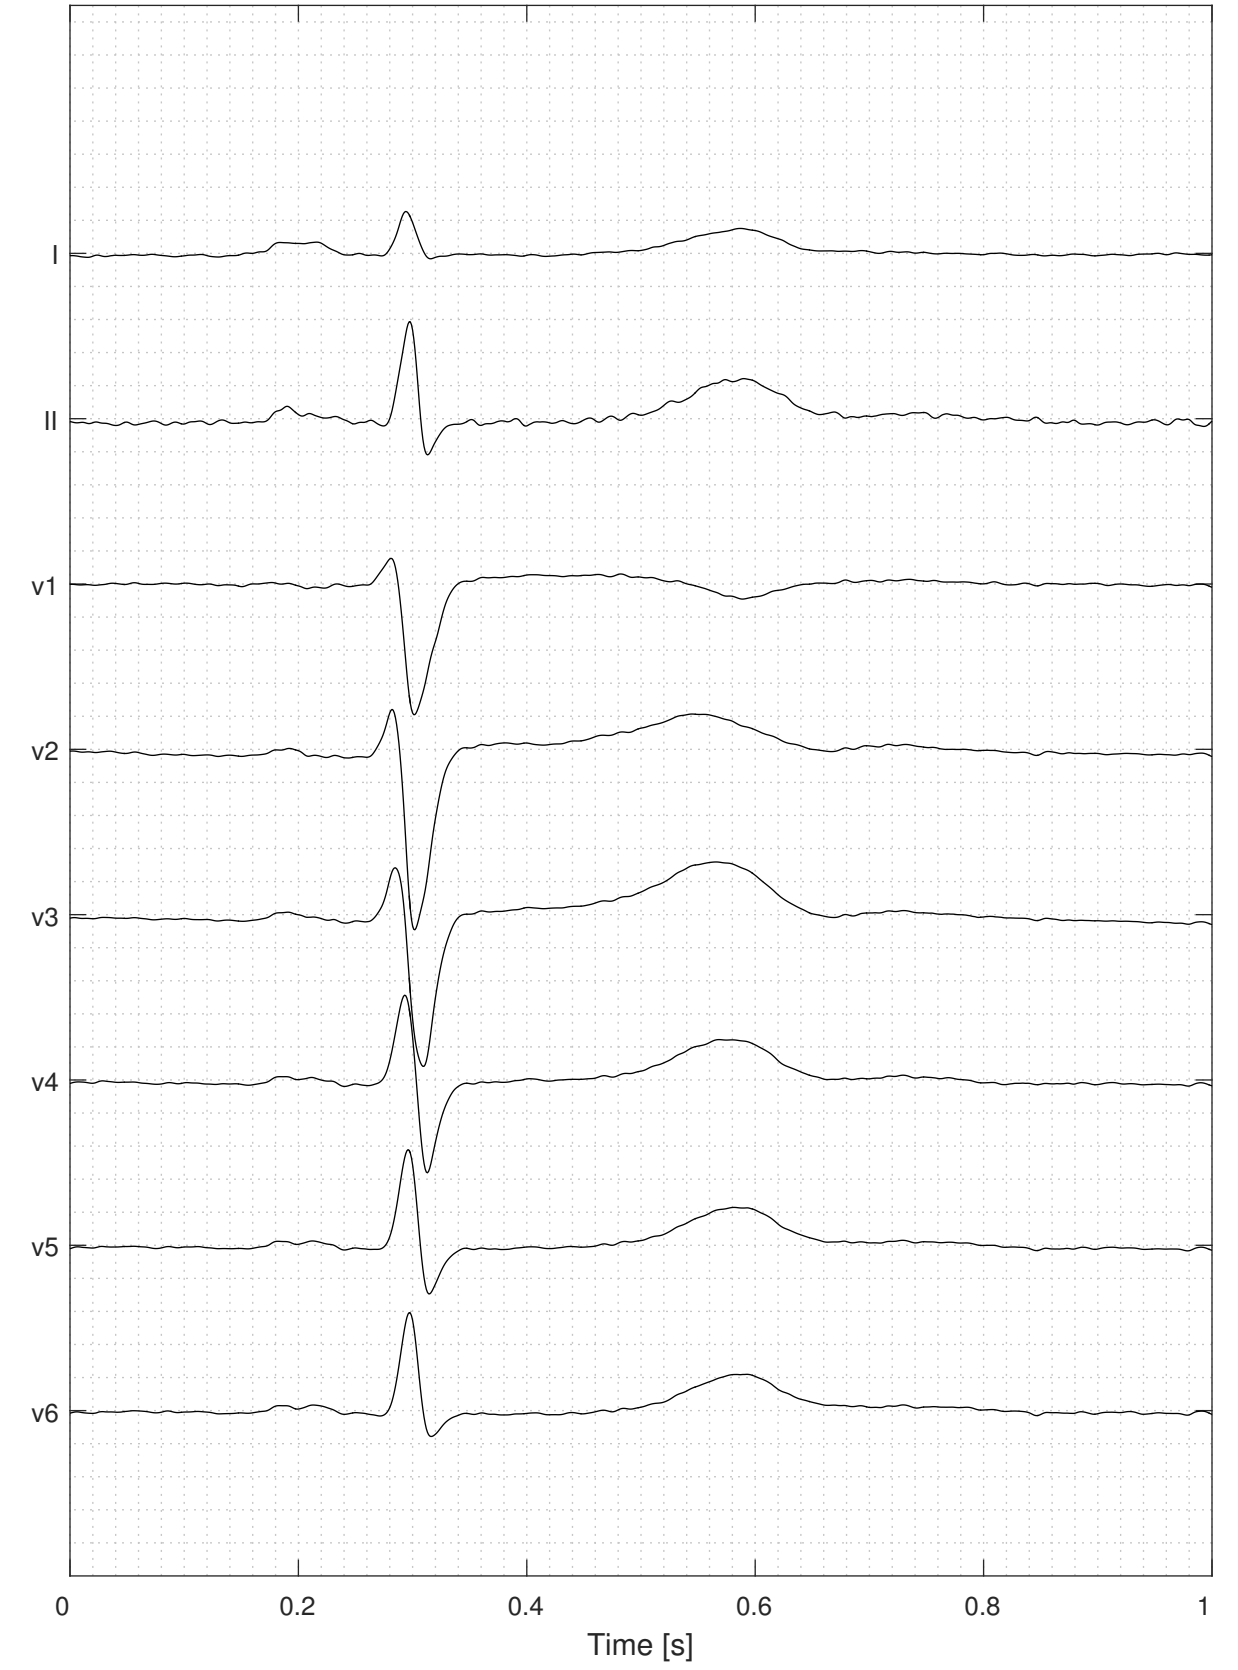

Patient 52

Low RR, Complex #: 298

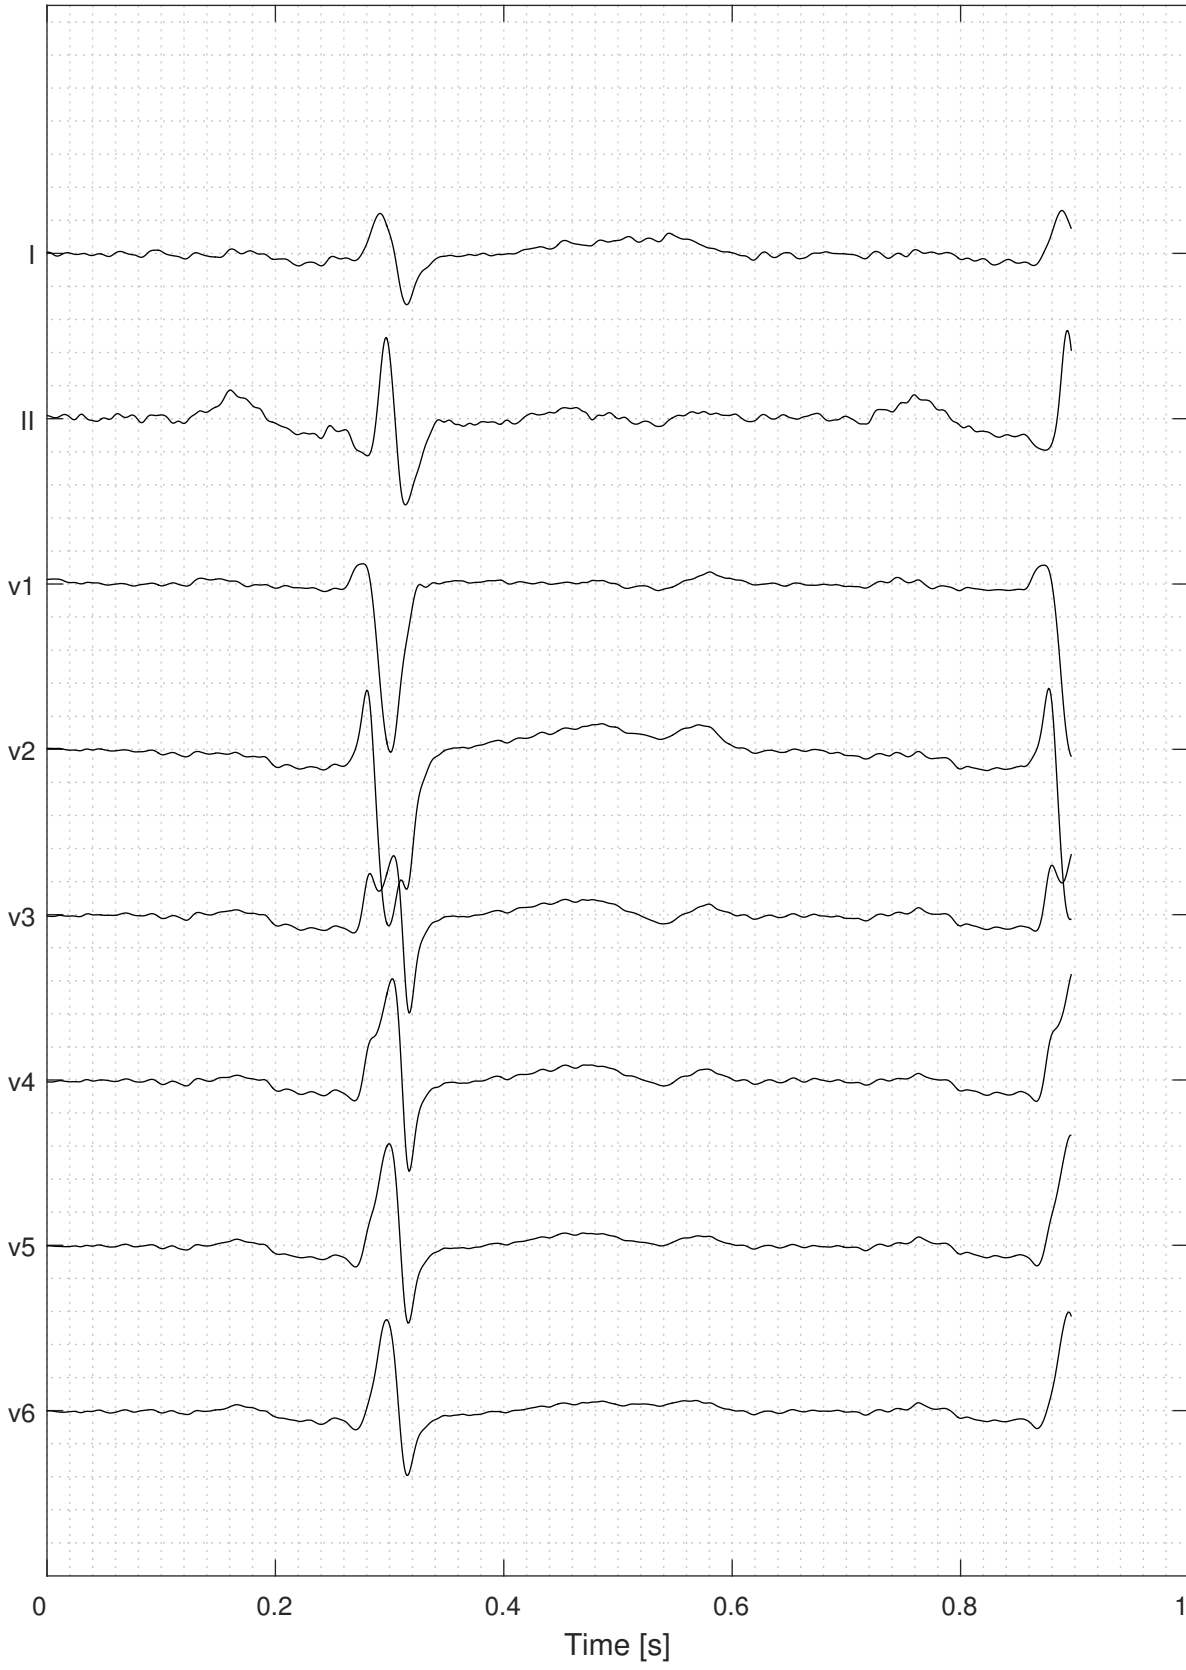

Mid RR, Complex #: 334

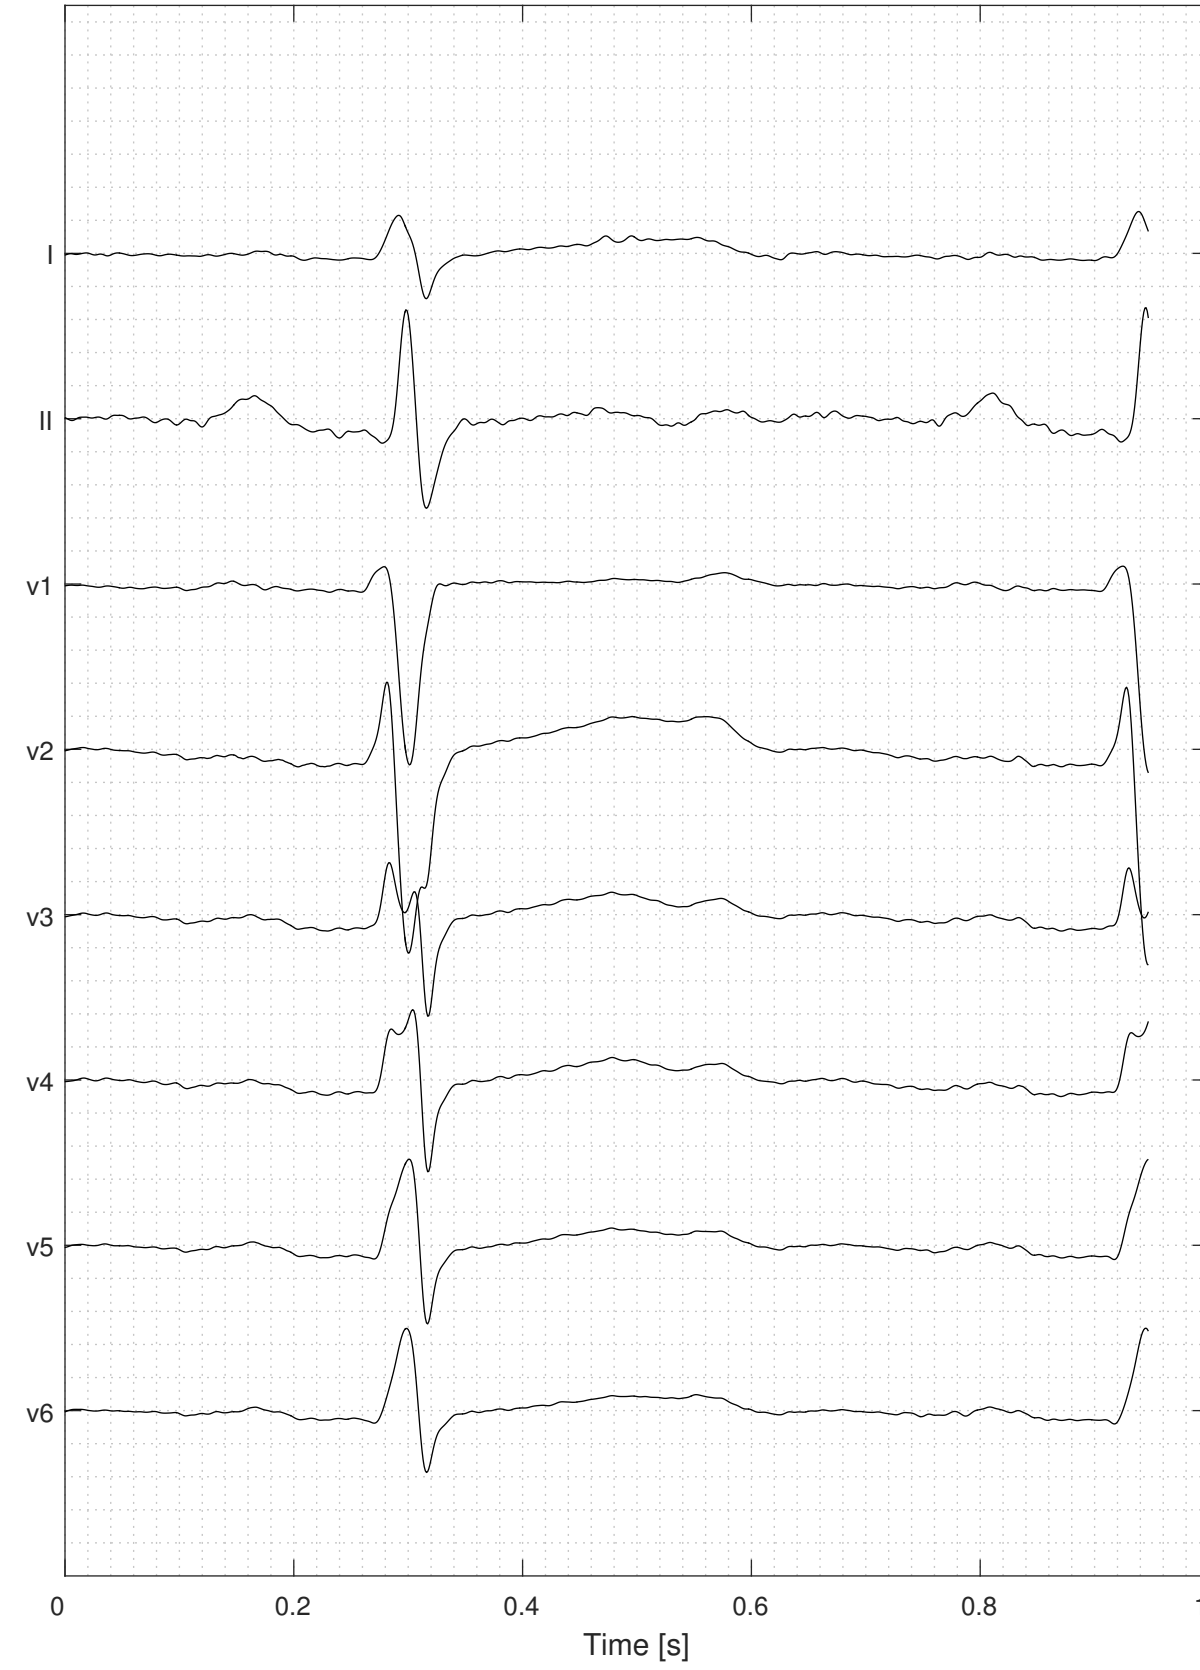

High RR, Complex #: 78

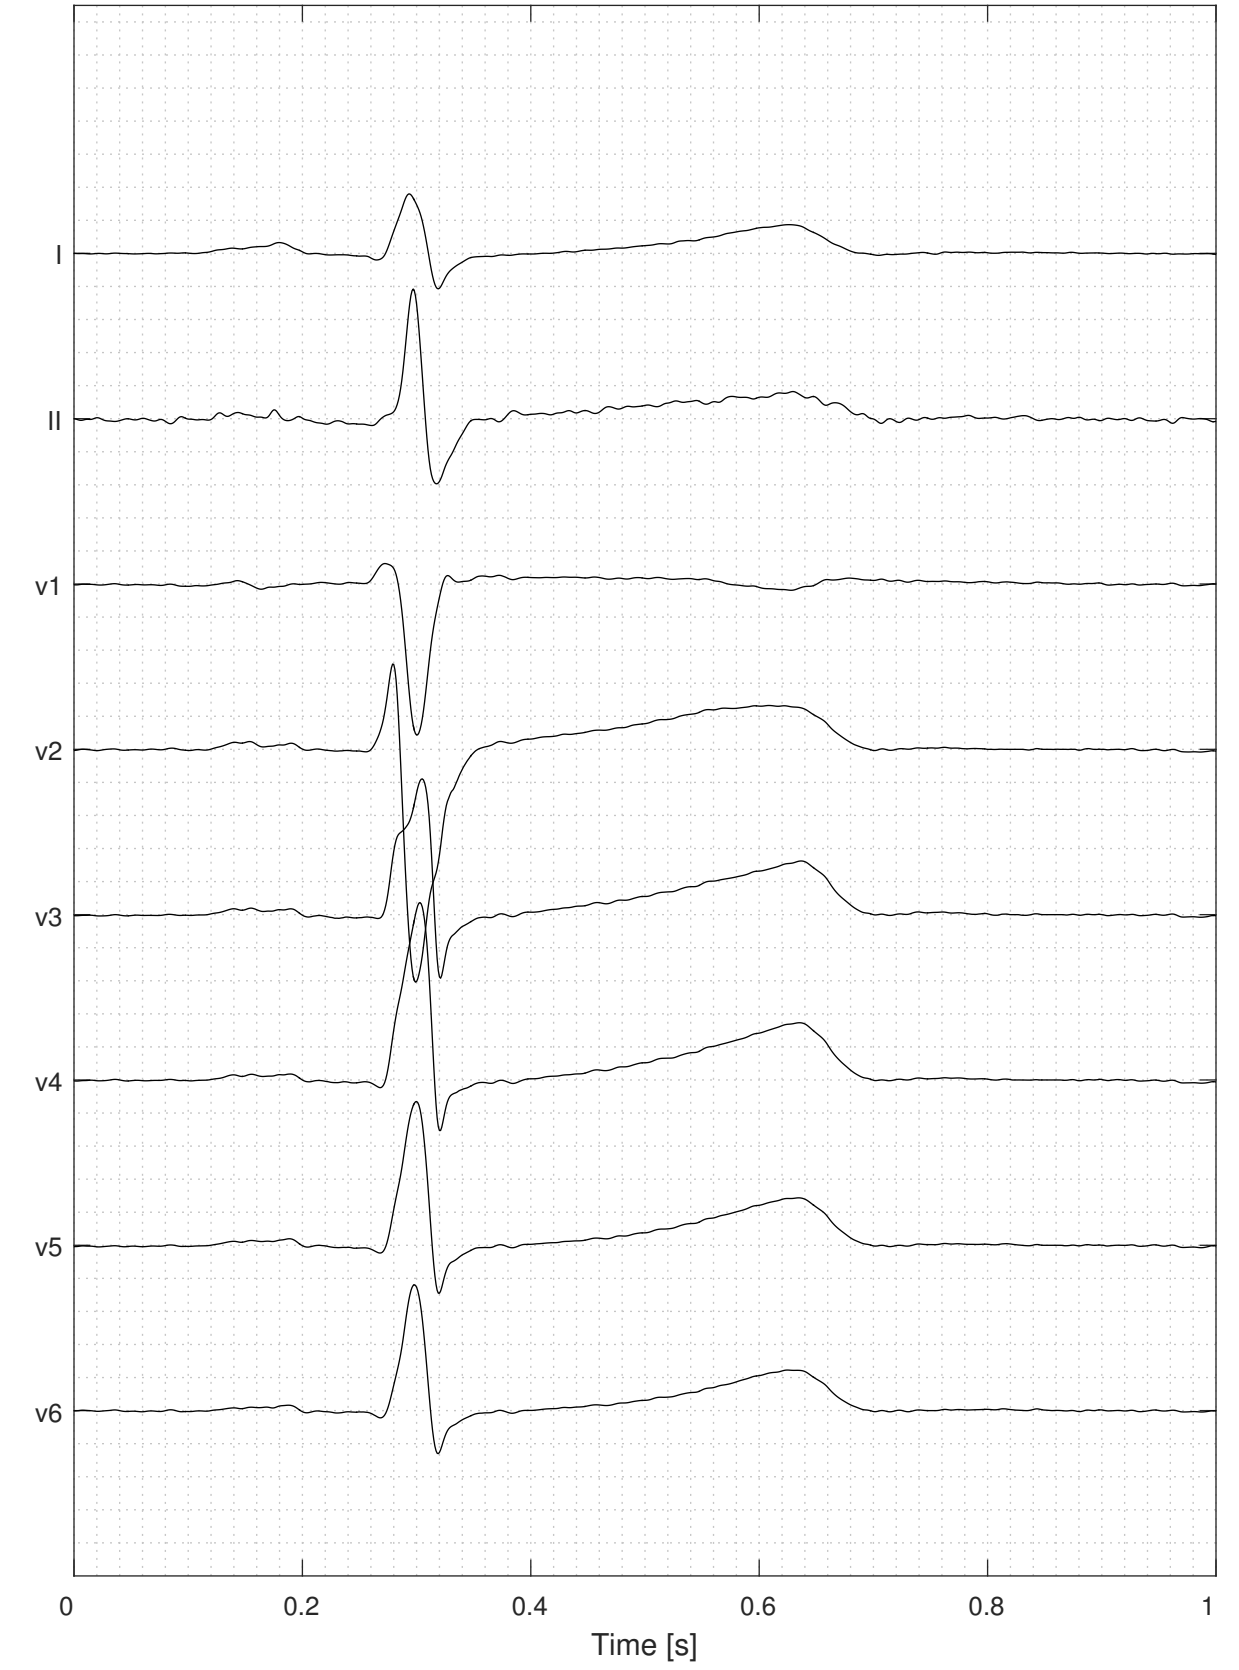

Patient 53

Low RR, Complex #: 328

Mid RR, Complex #: 55

High RR, Complex #: 34

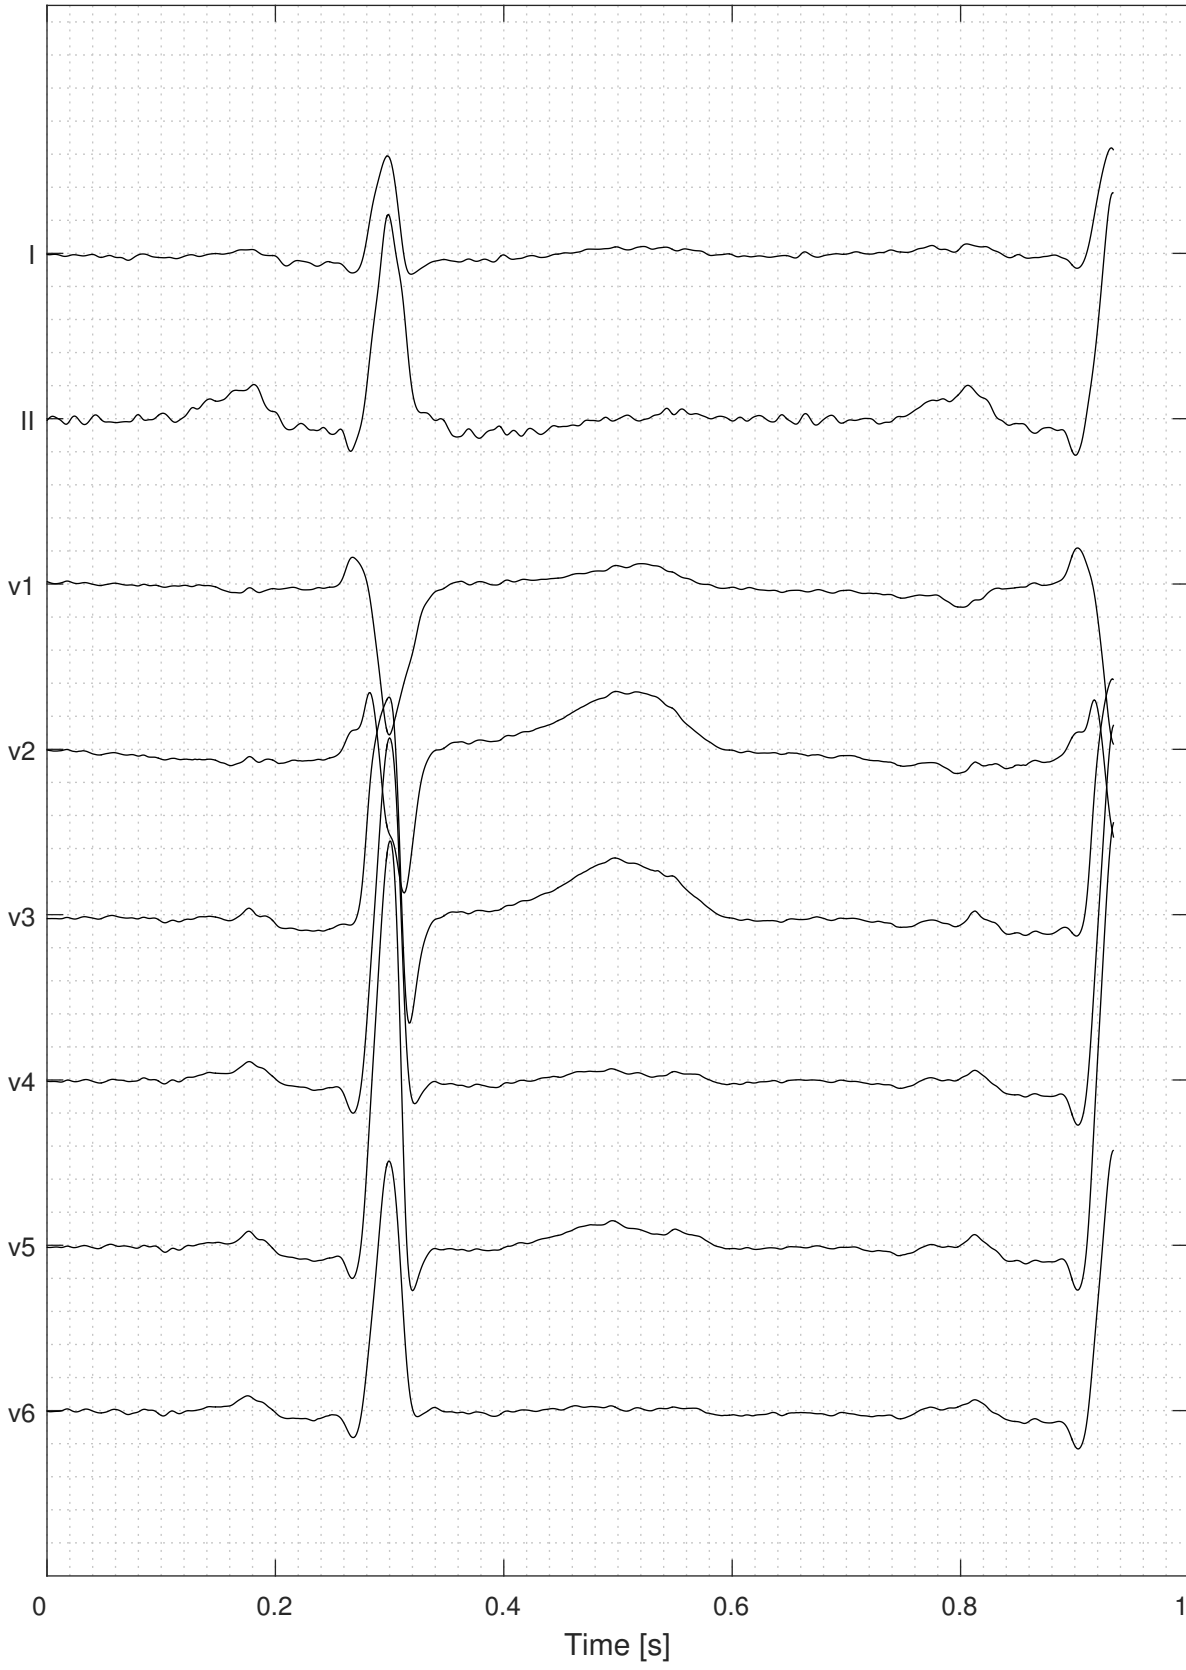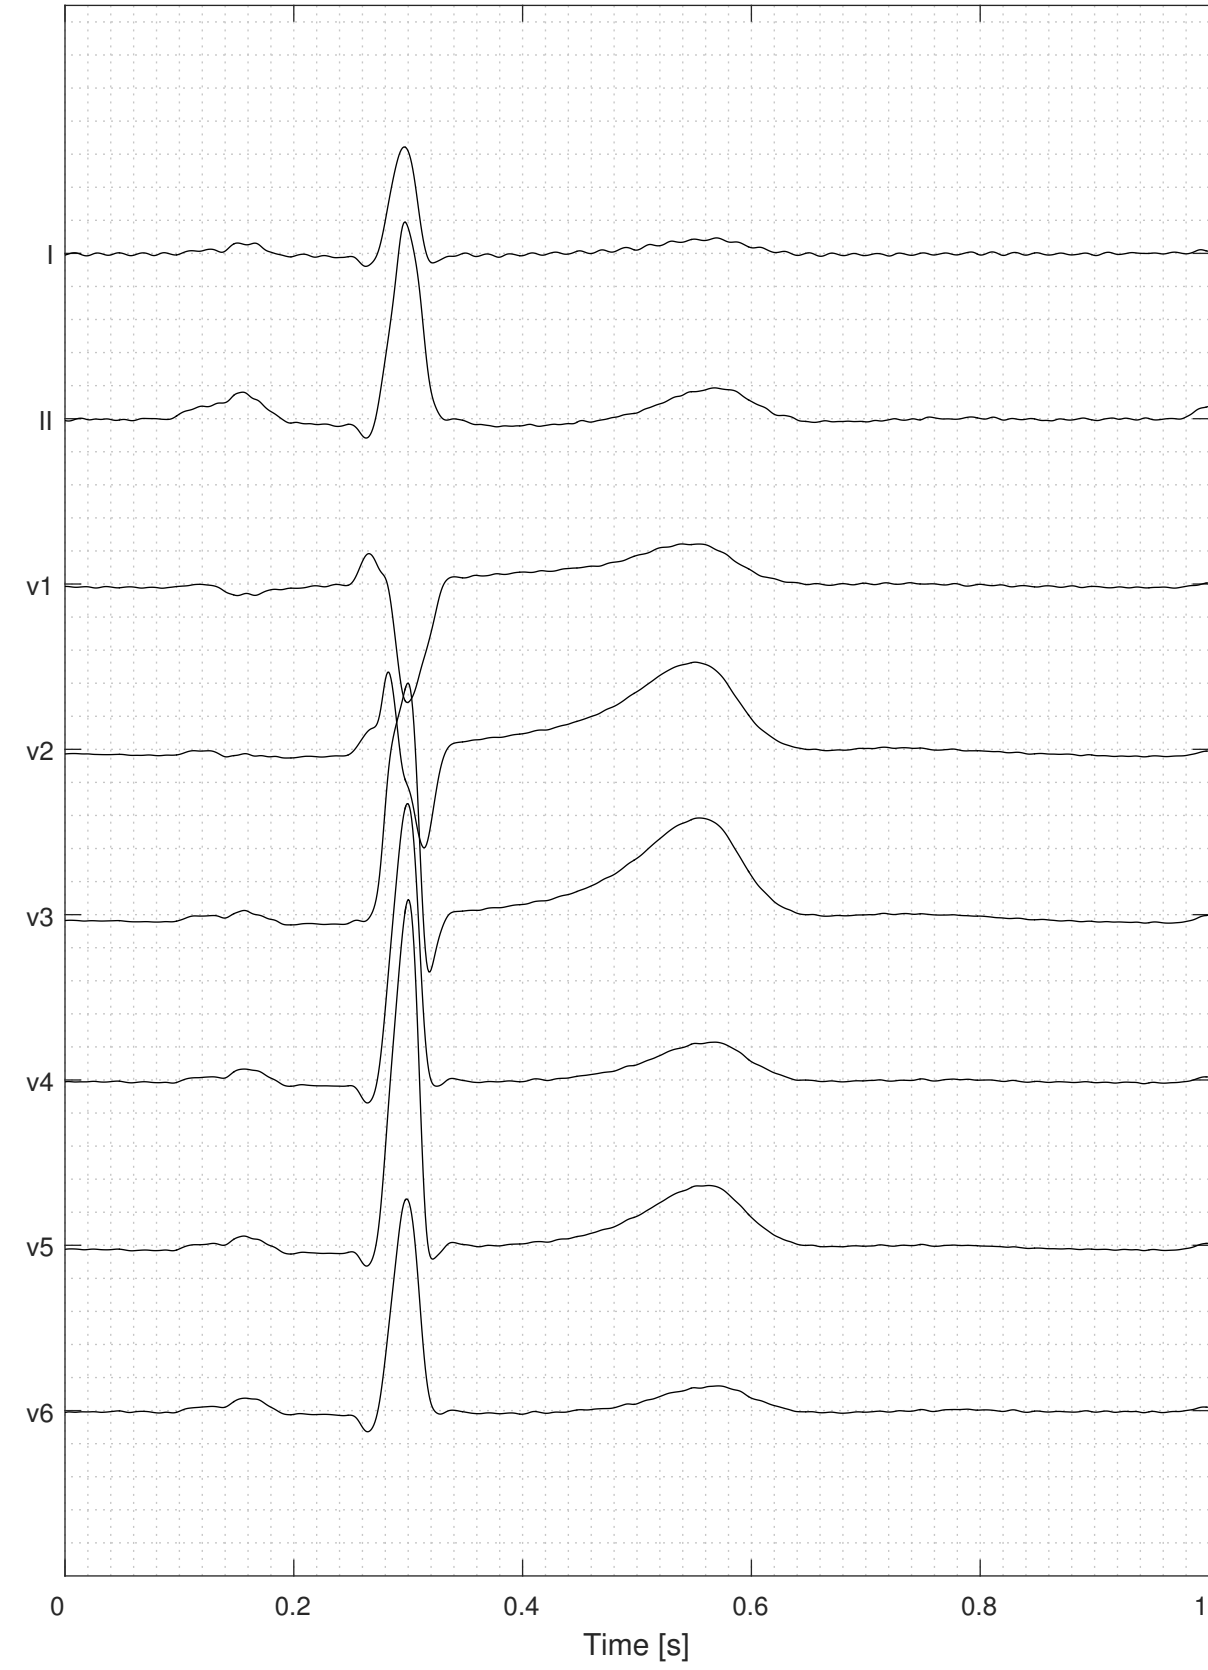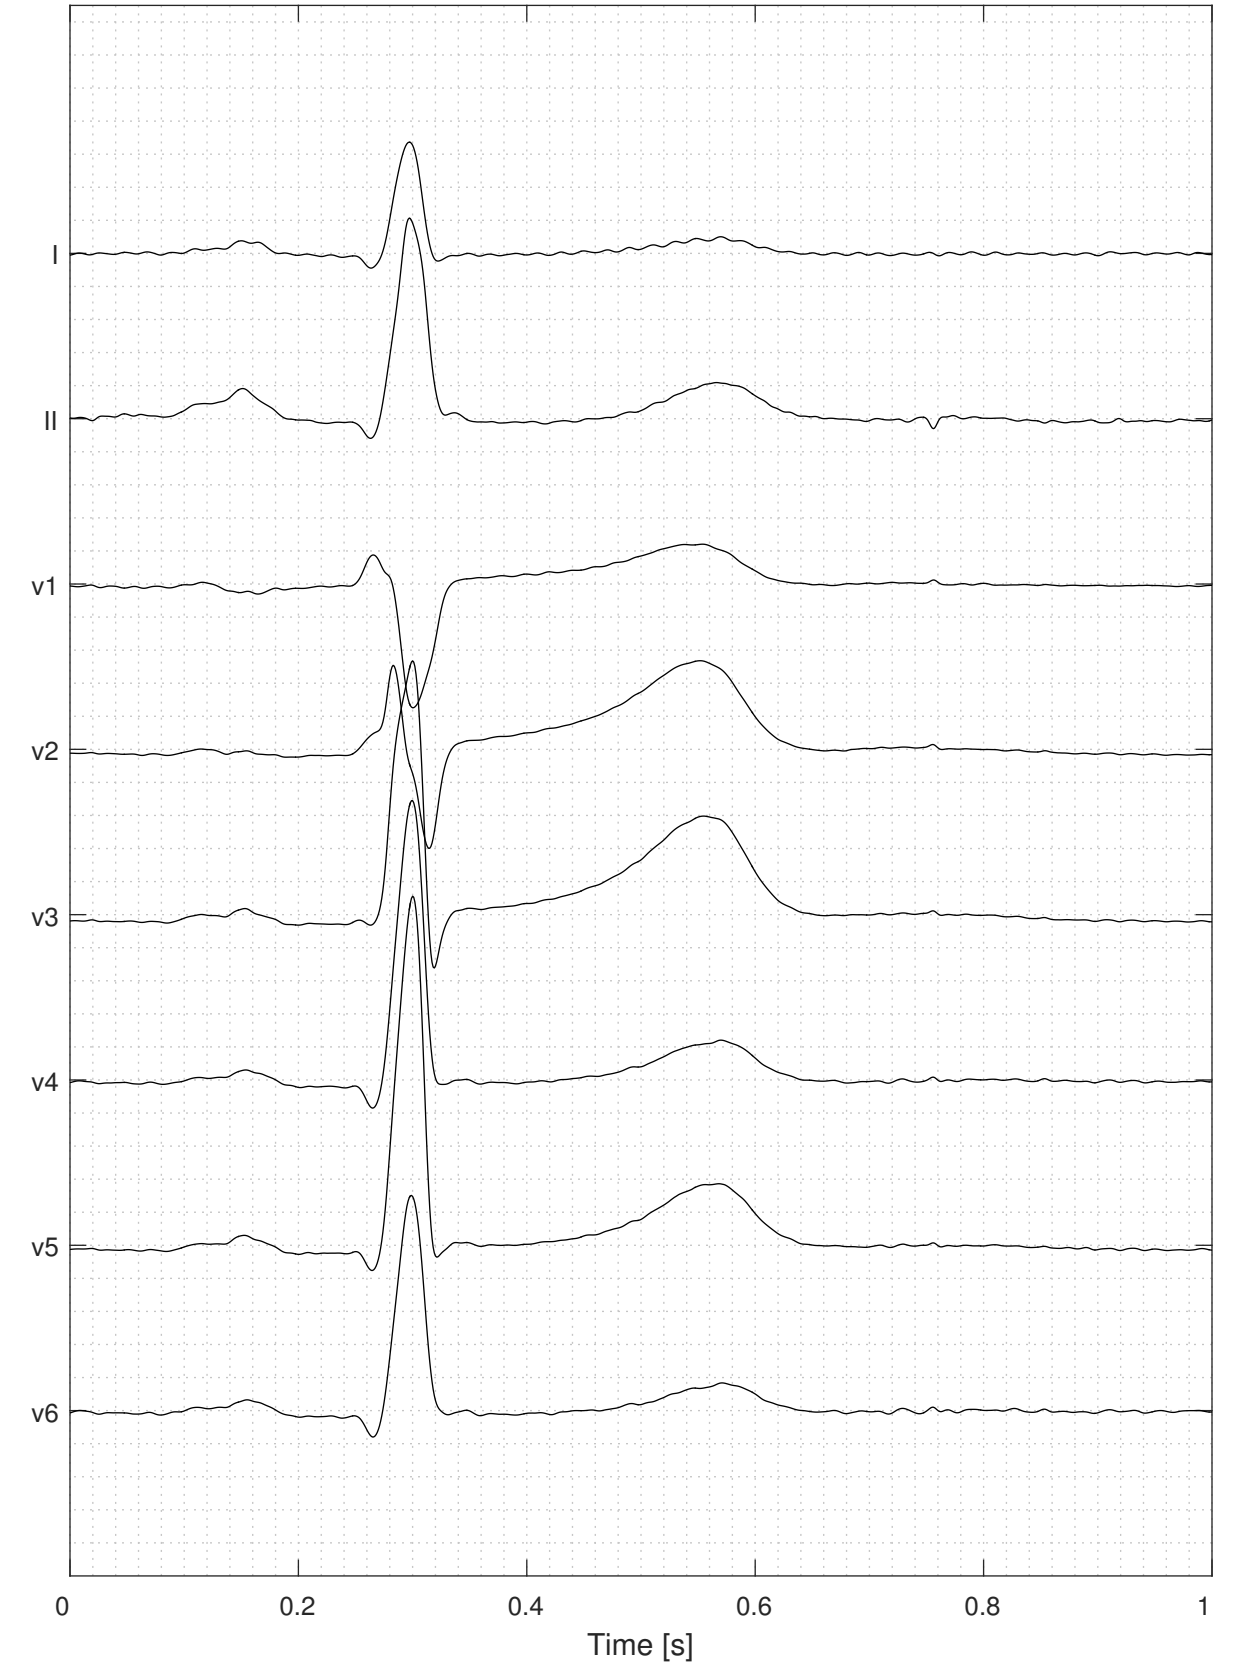

Patient 54

Low RR, Complex #: 529

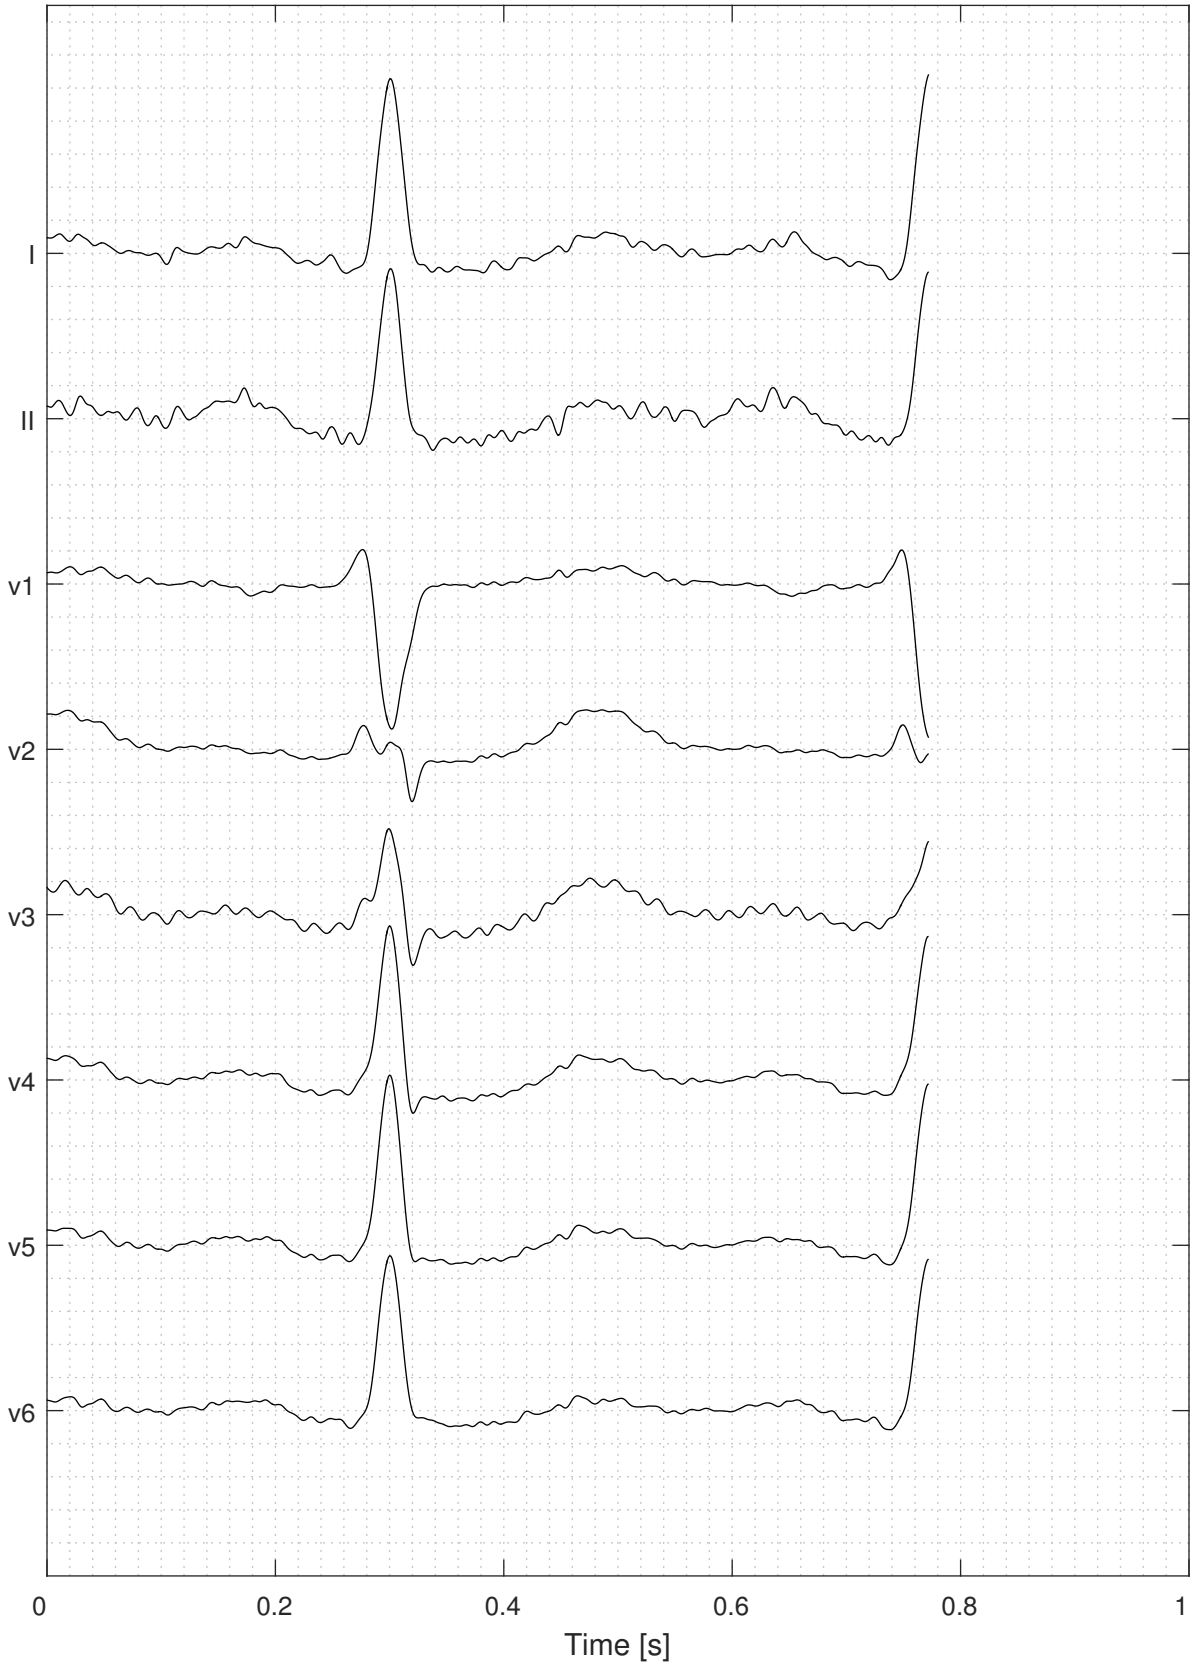

Mid RR, Complex #: 434

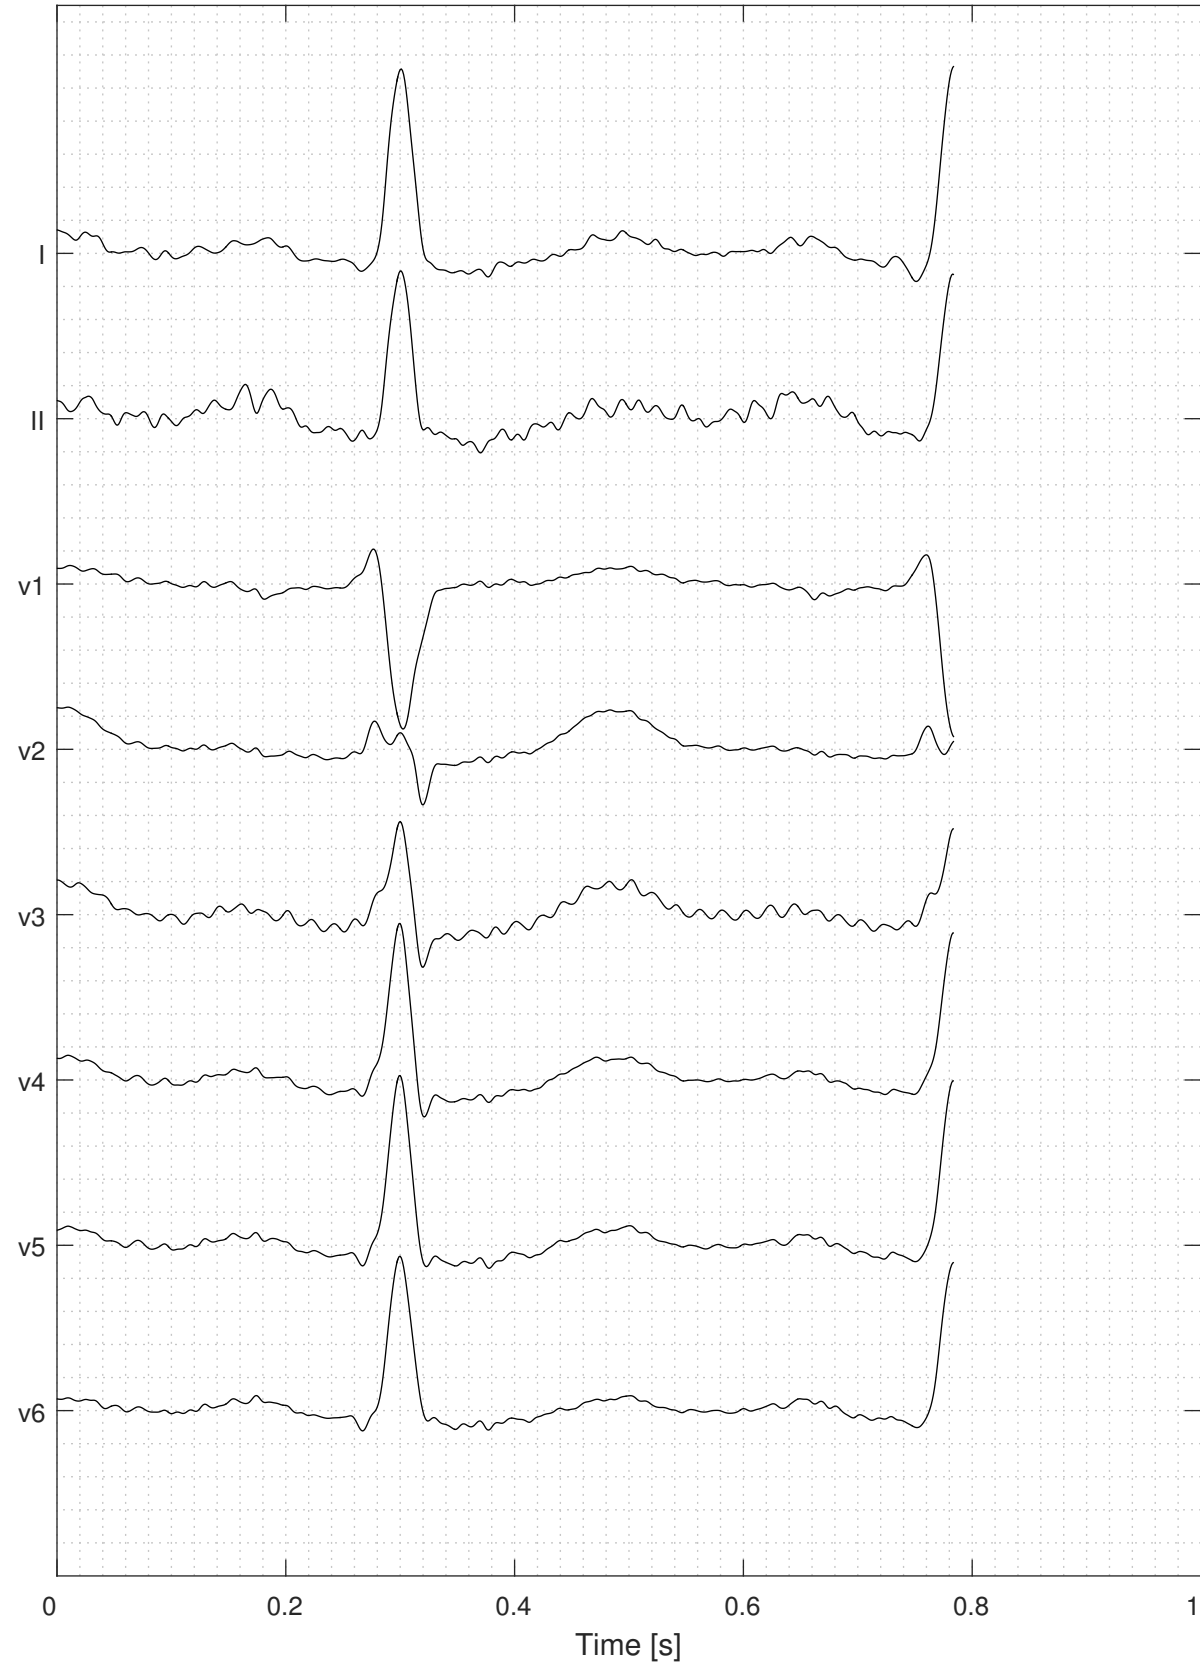

High RR, Complex #: 211

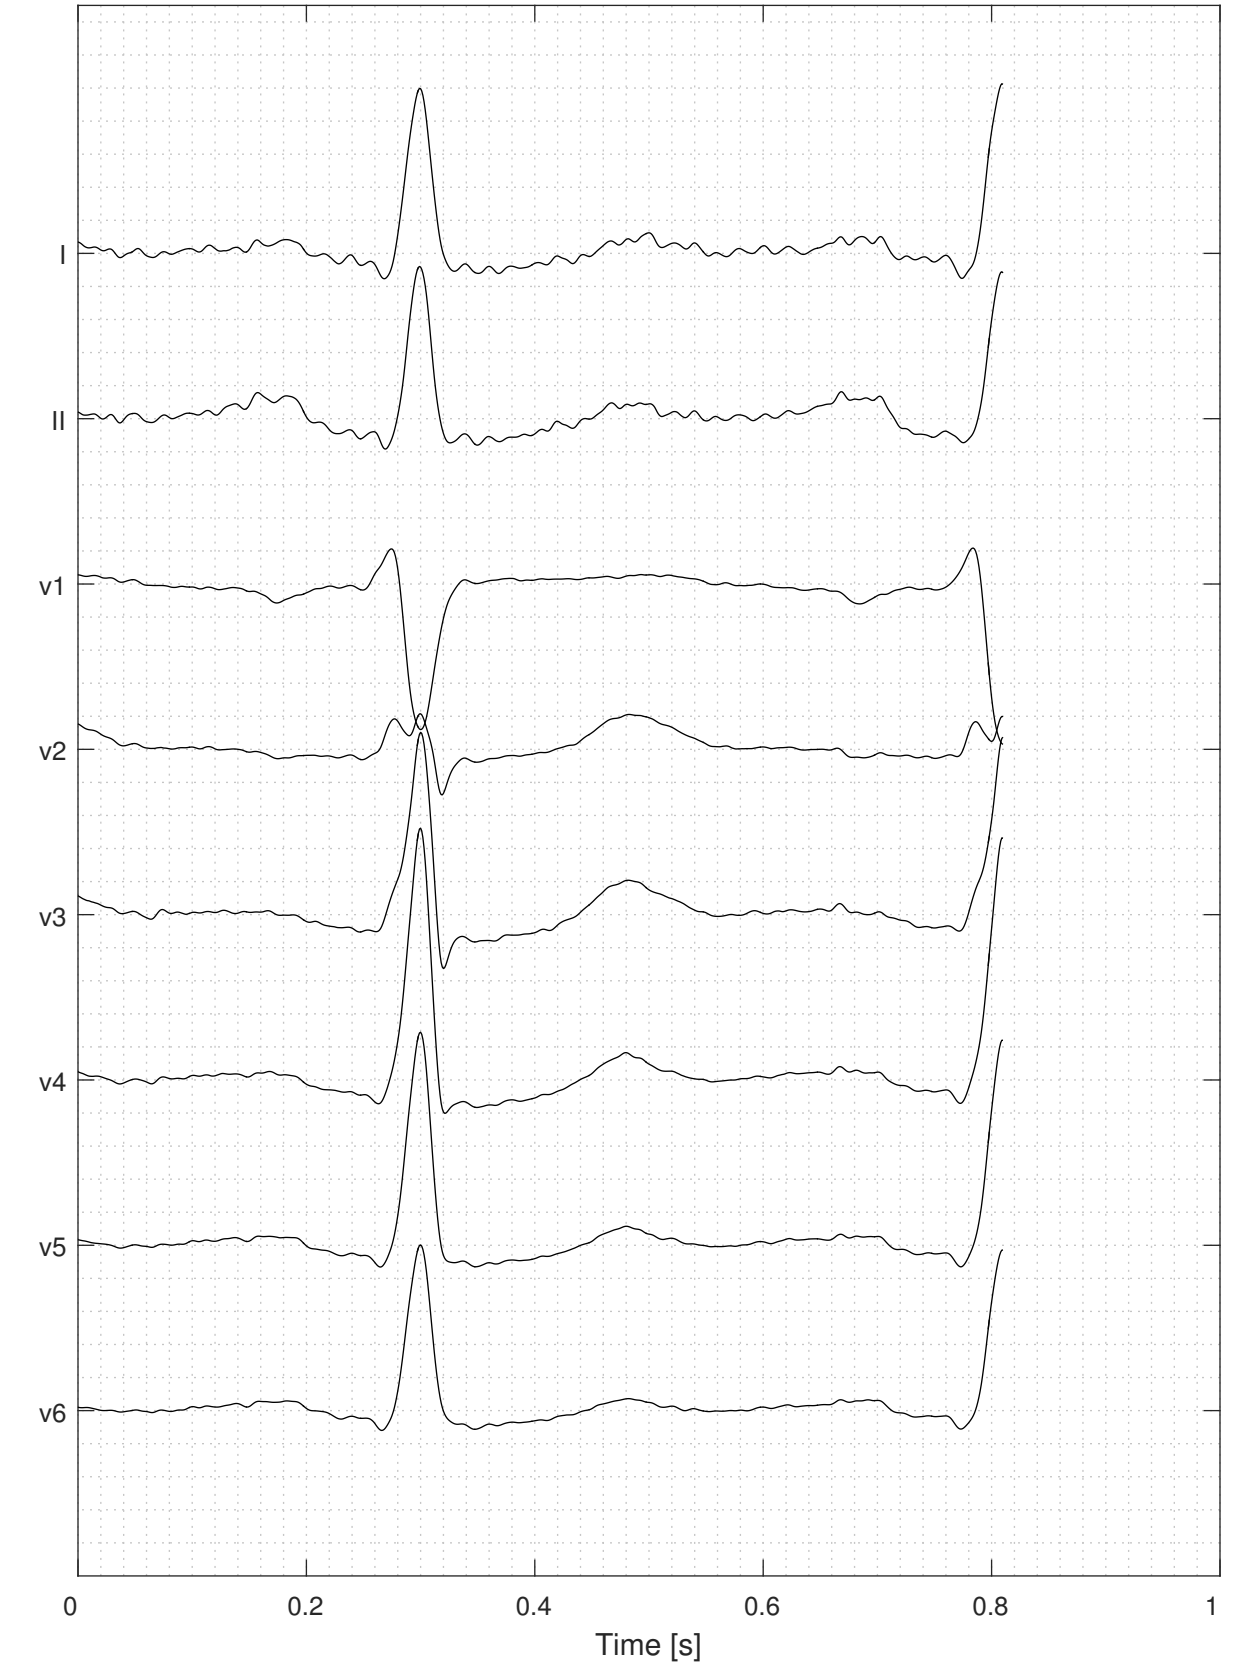

Patient 55

Low RR, Complex #: 277

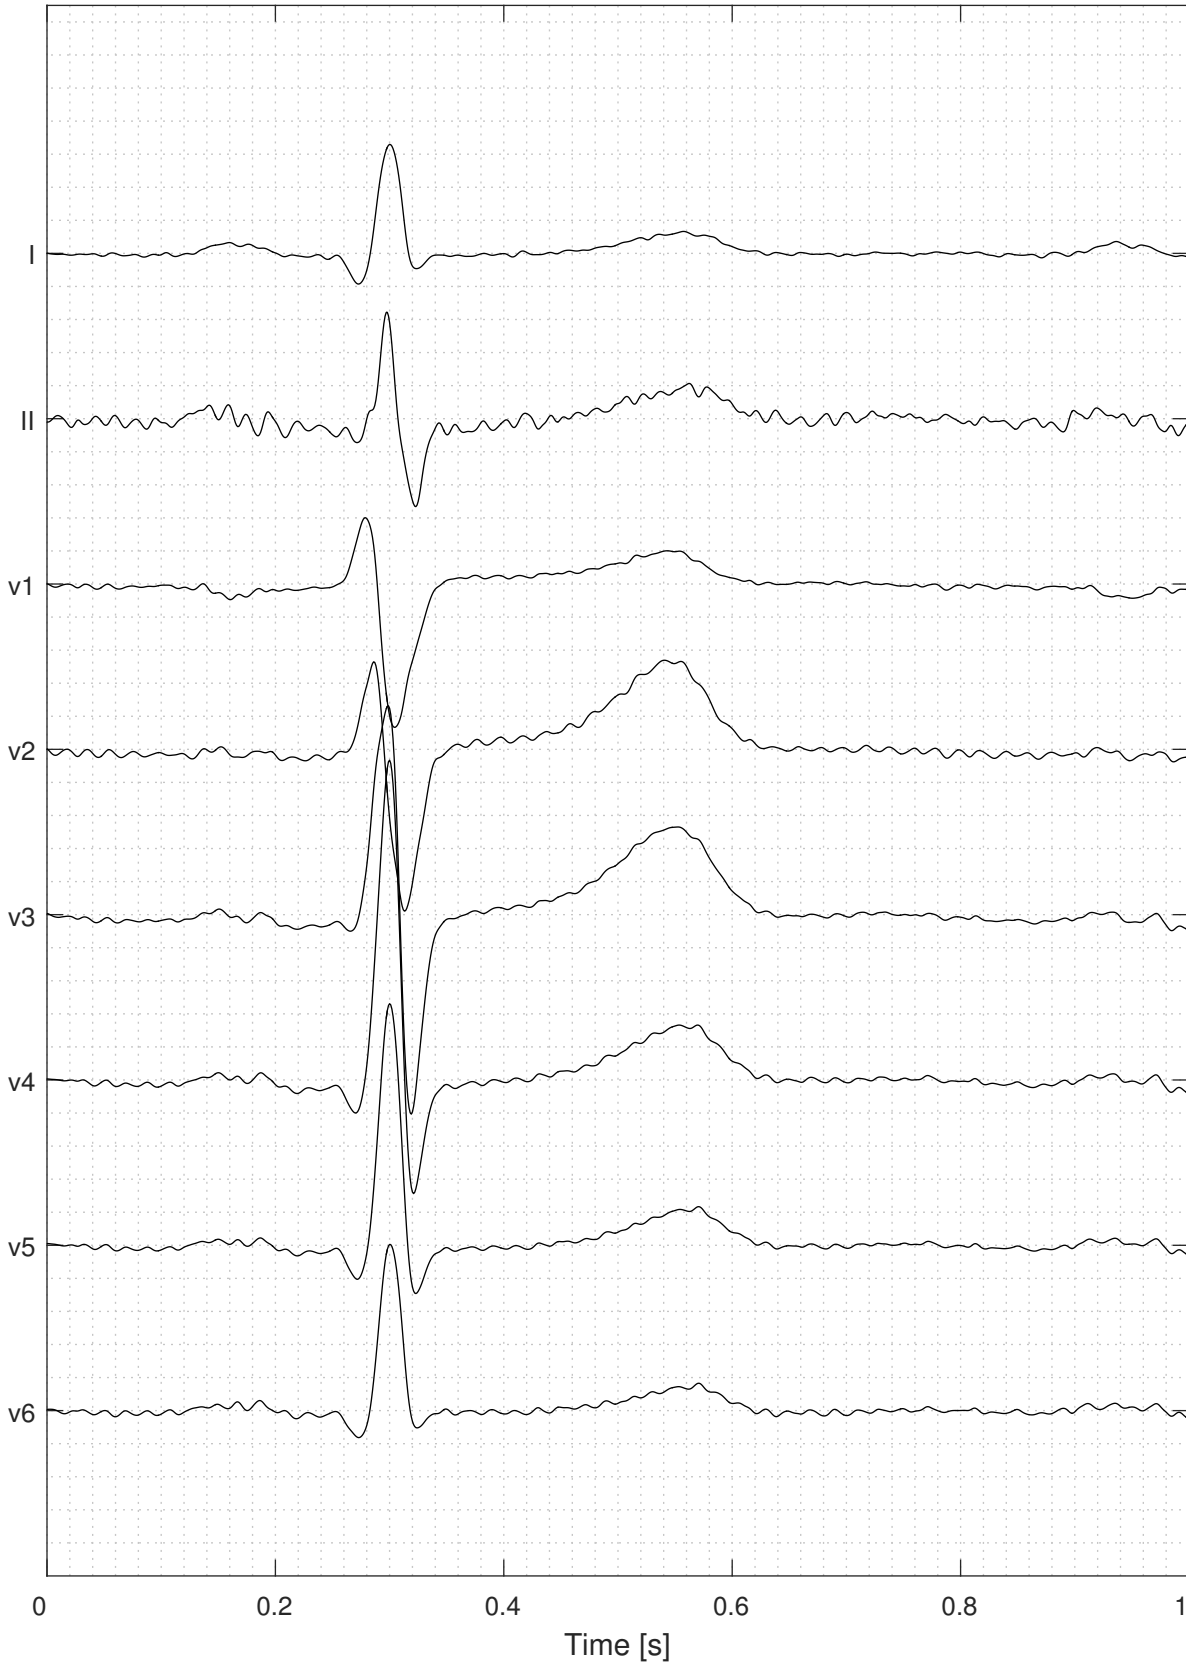

Mid RR, Complex #: 75

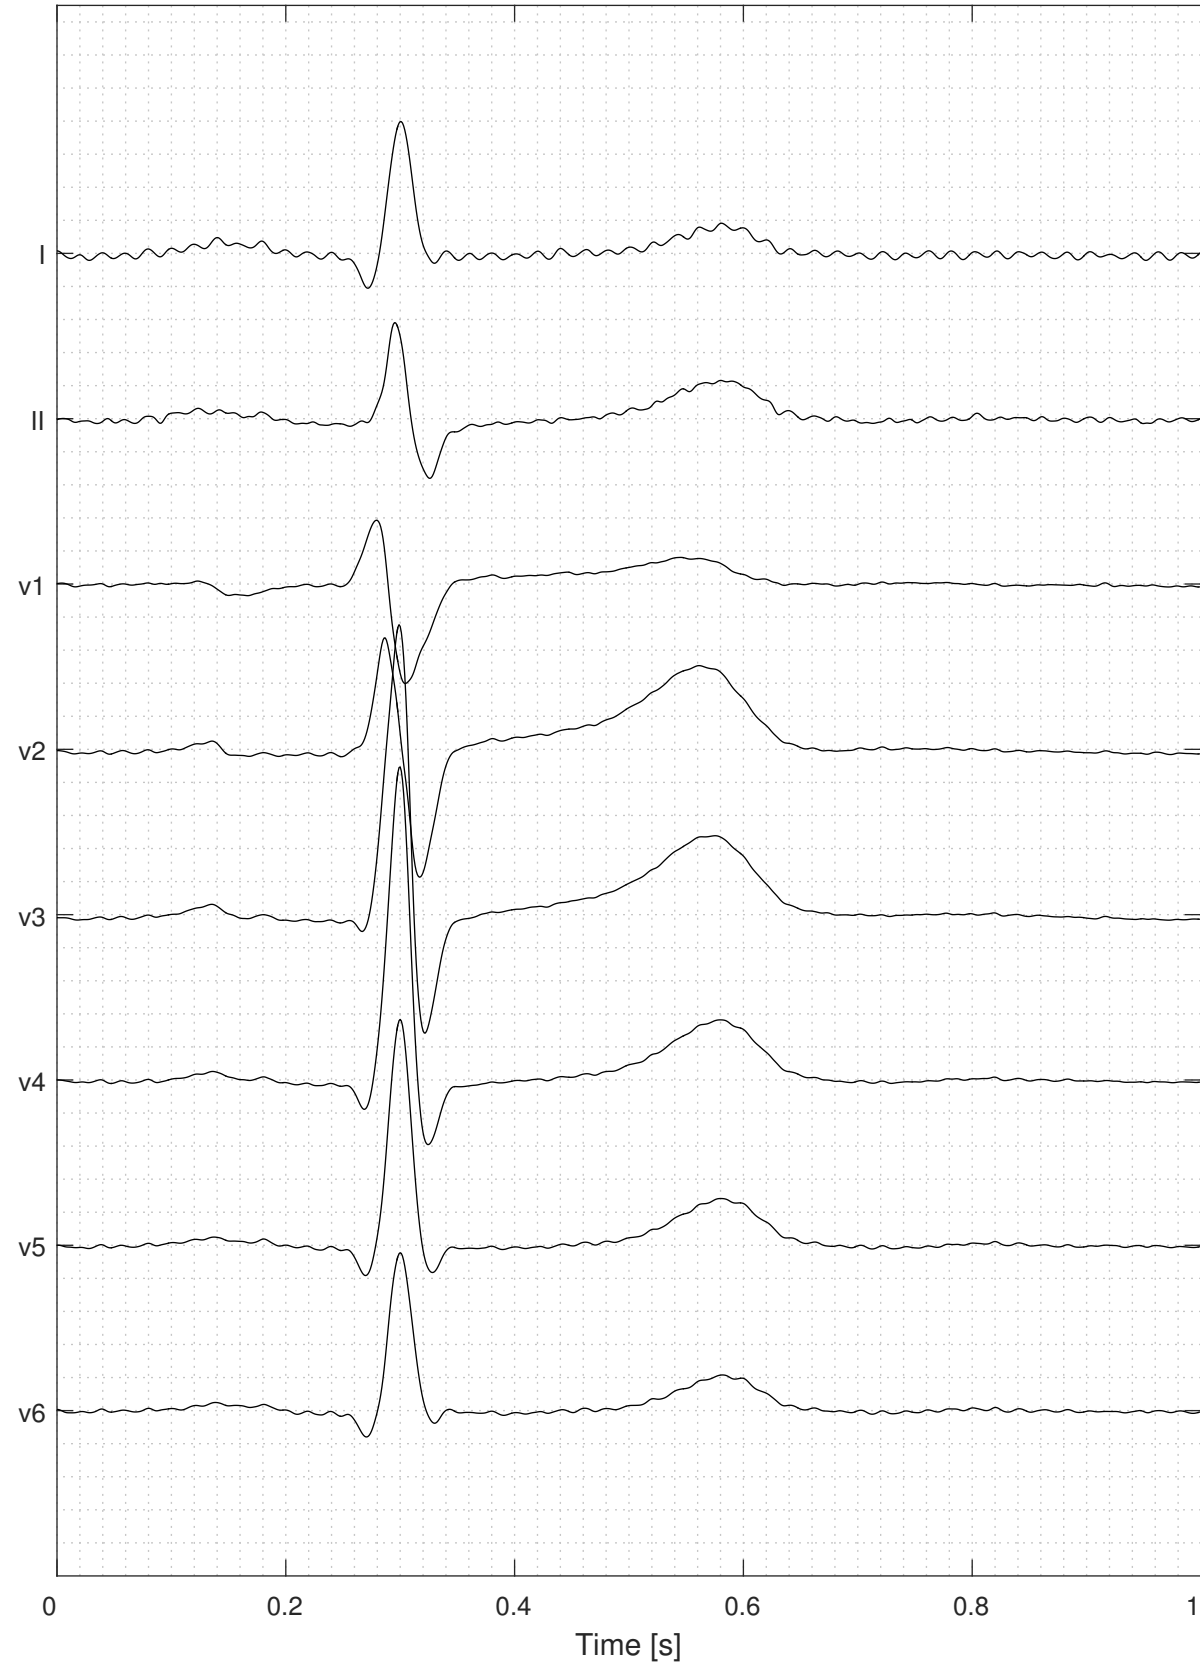

High RR, Complex #: 65

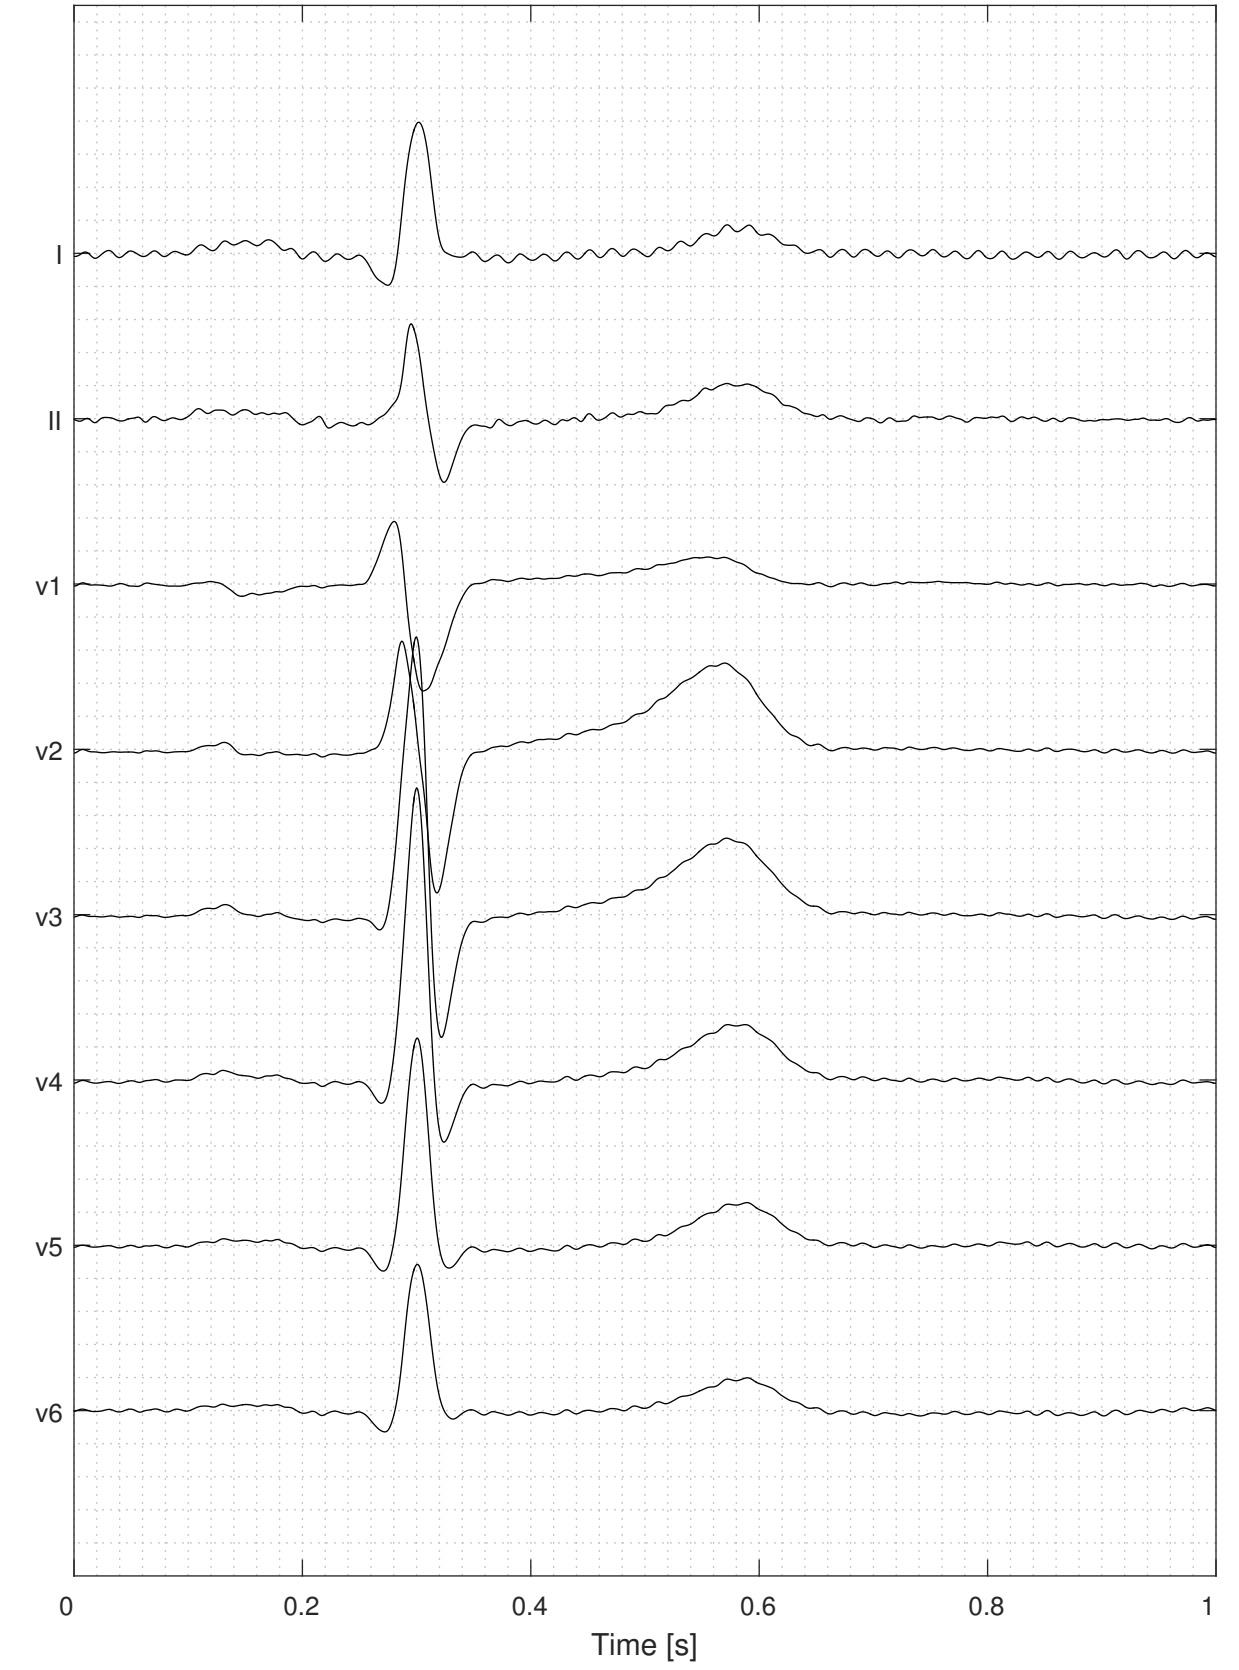

Patient 56

Low RR, Complex #: 149

Mid RR, Complex #: 68

High RR, Complex #: 76

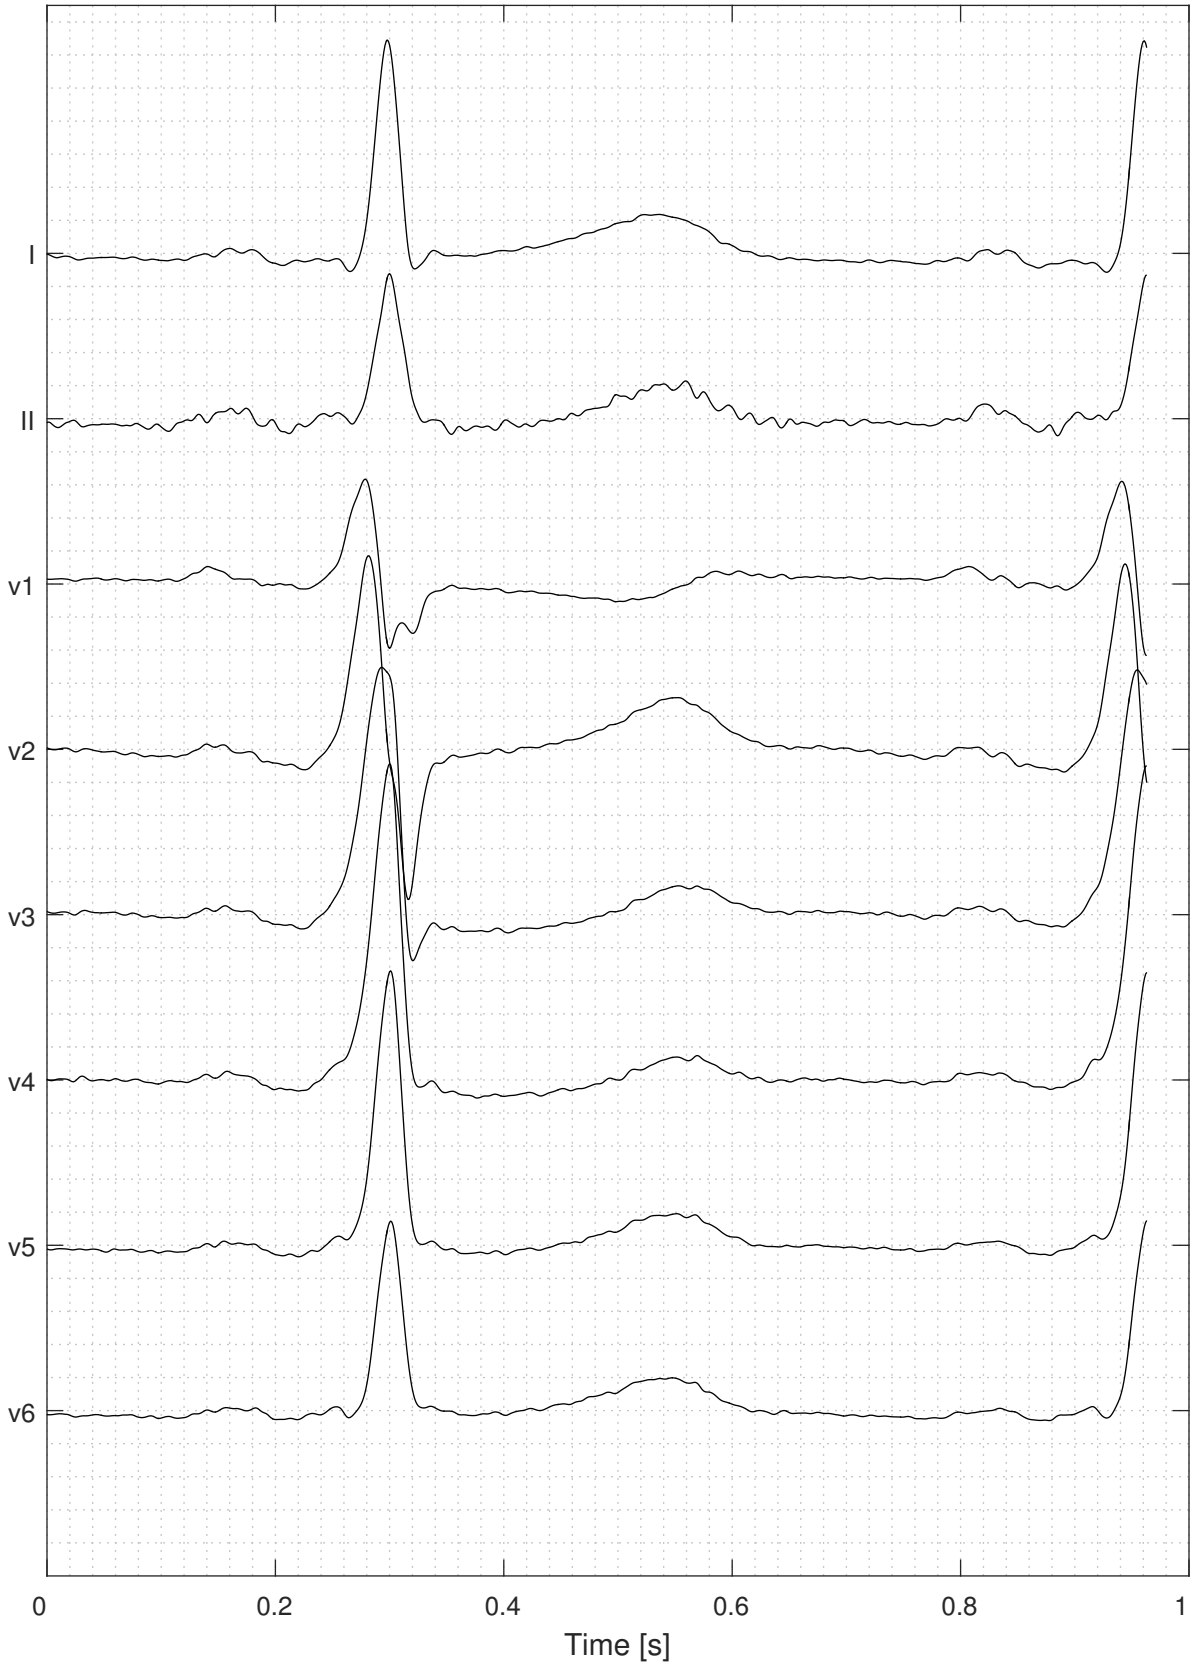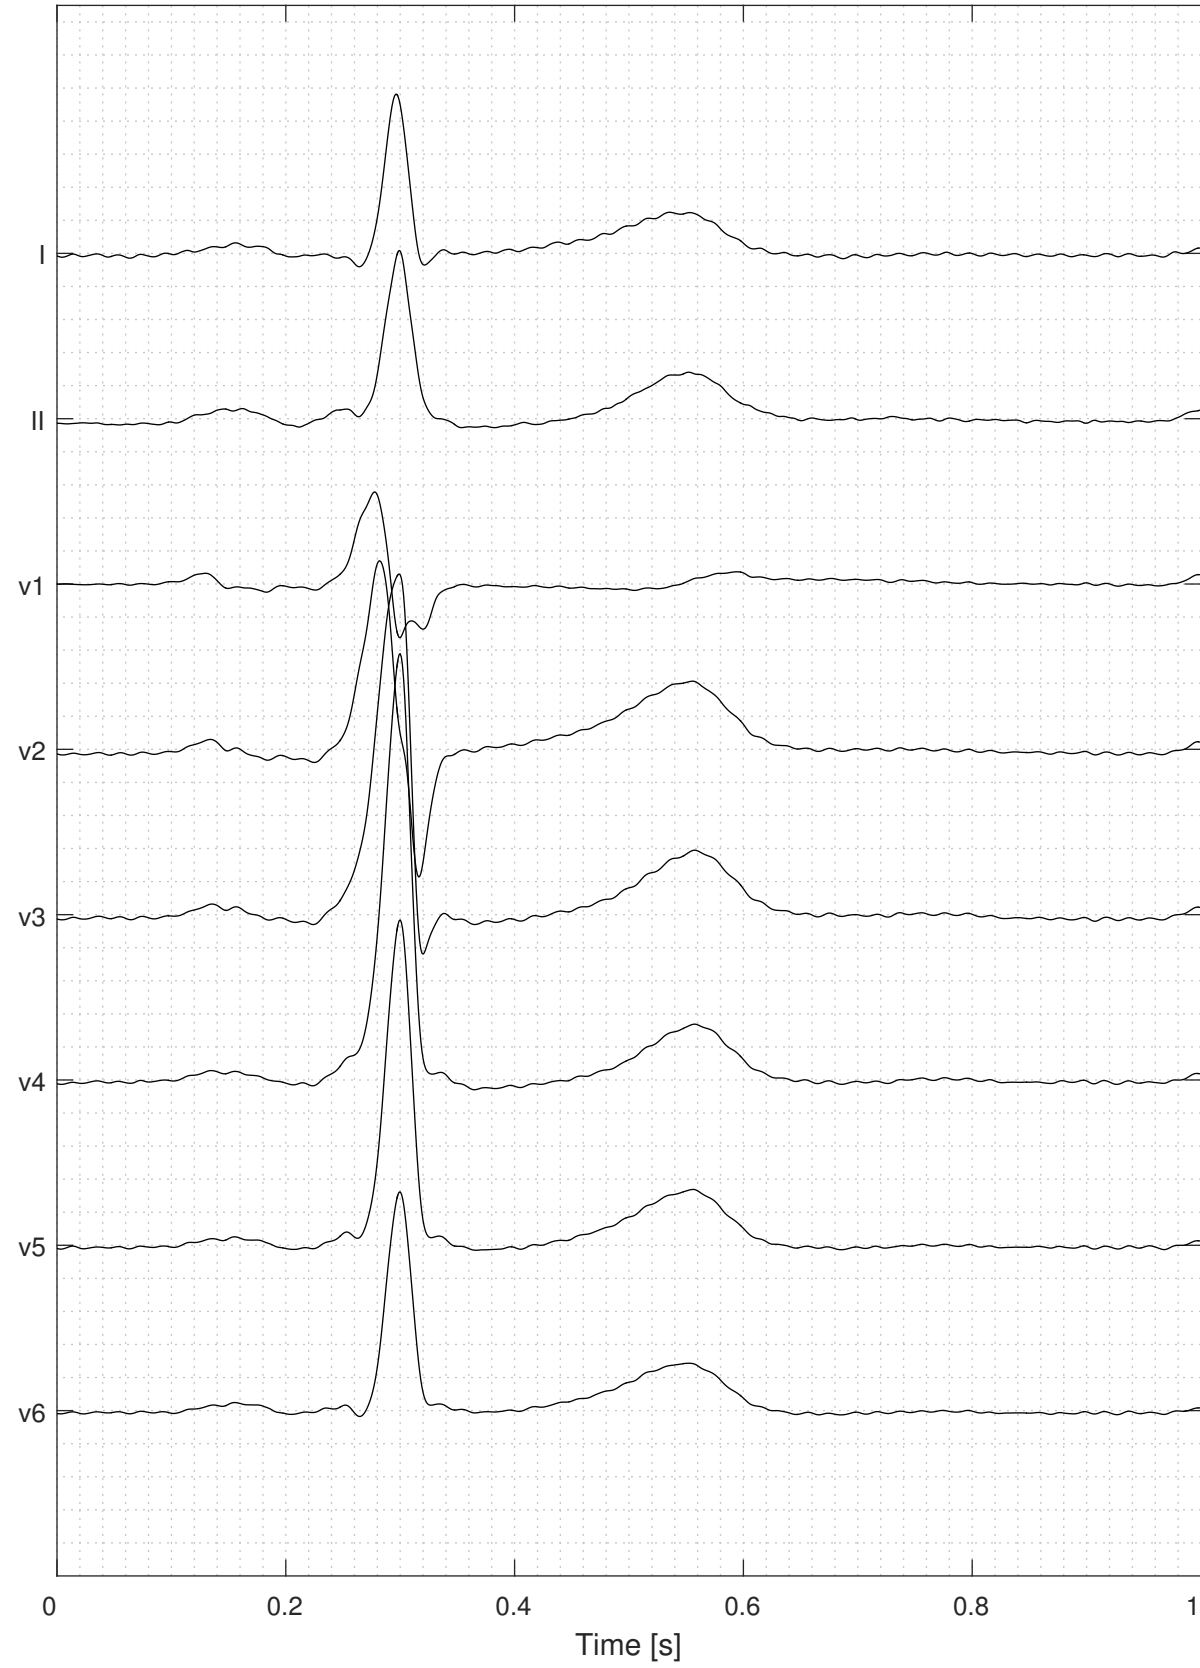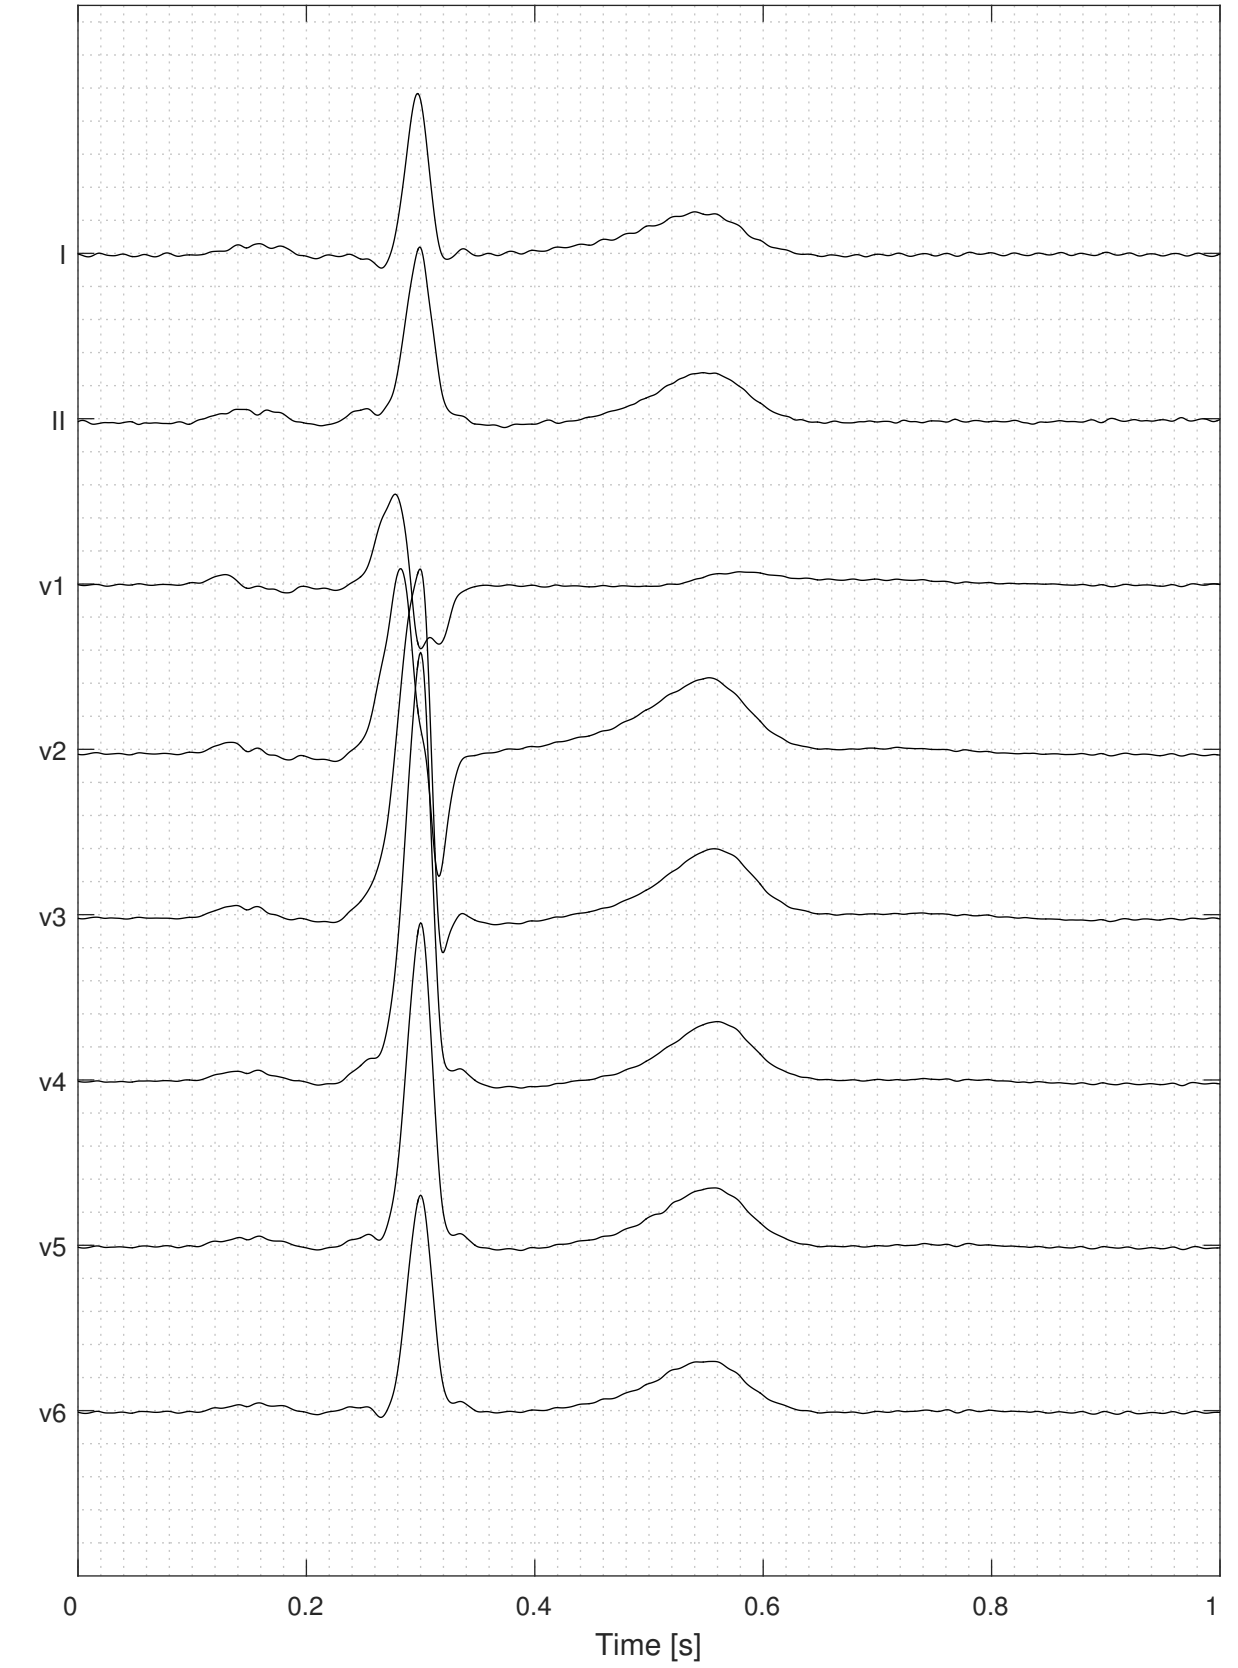



Patient 57

Low RR, Complex #: 253

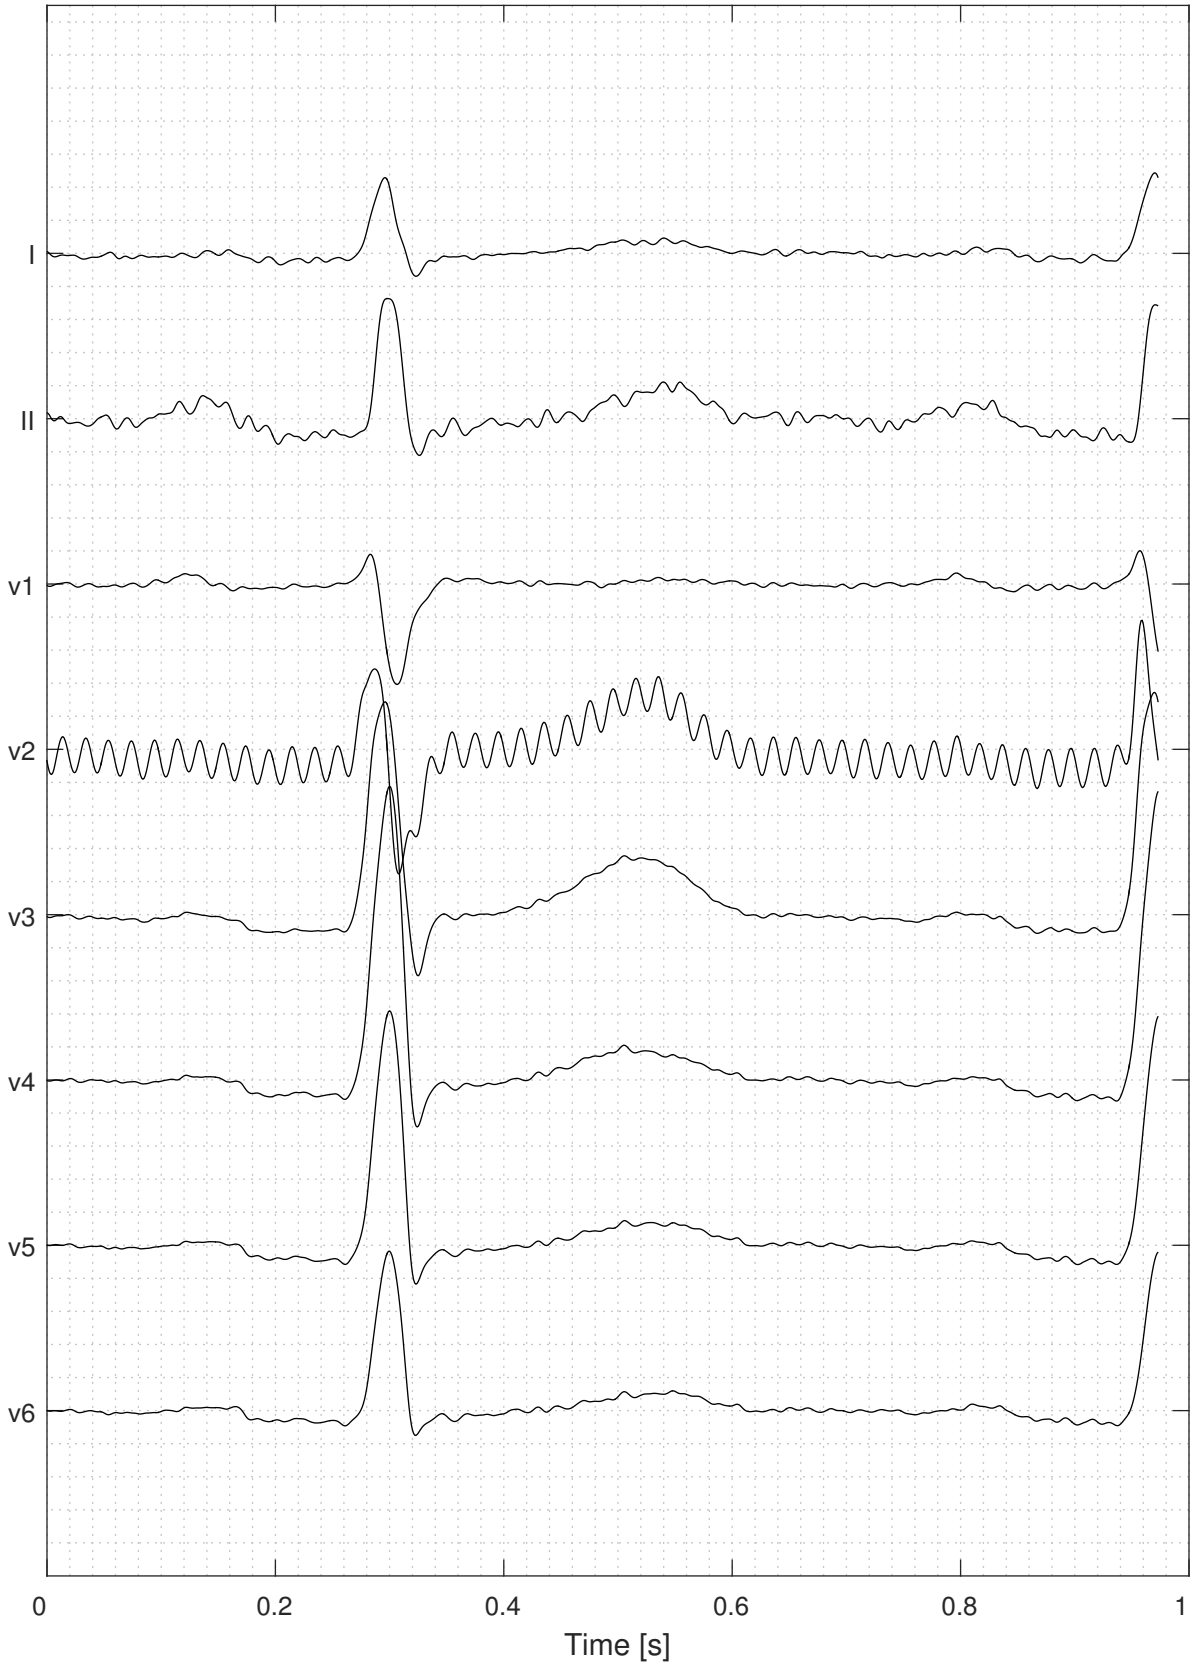

Mid RR, Complex #: 151

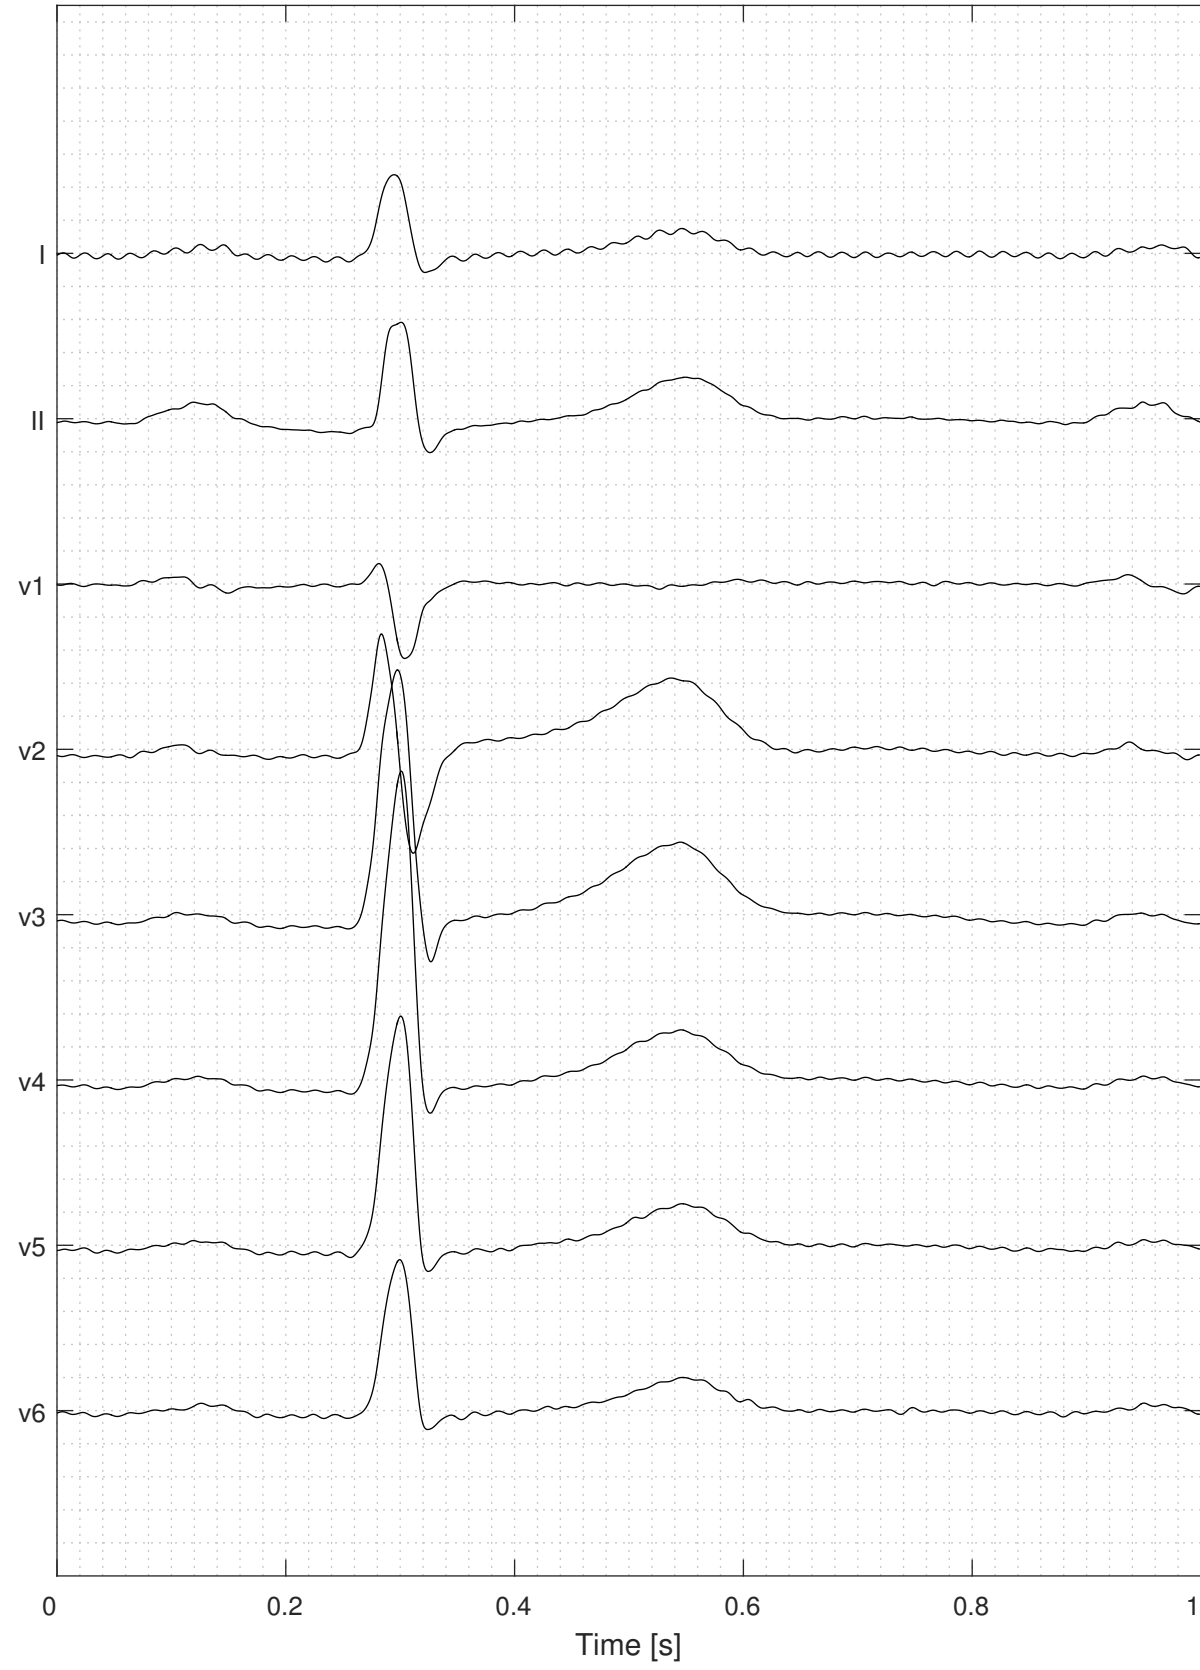

High RR, Complex #: 25

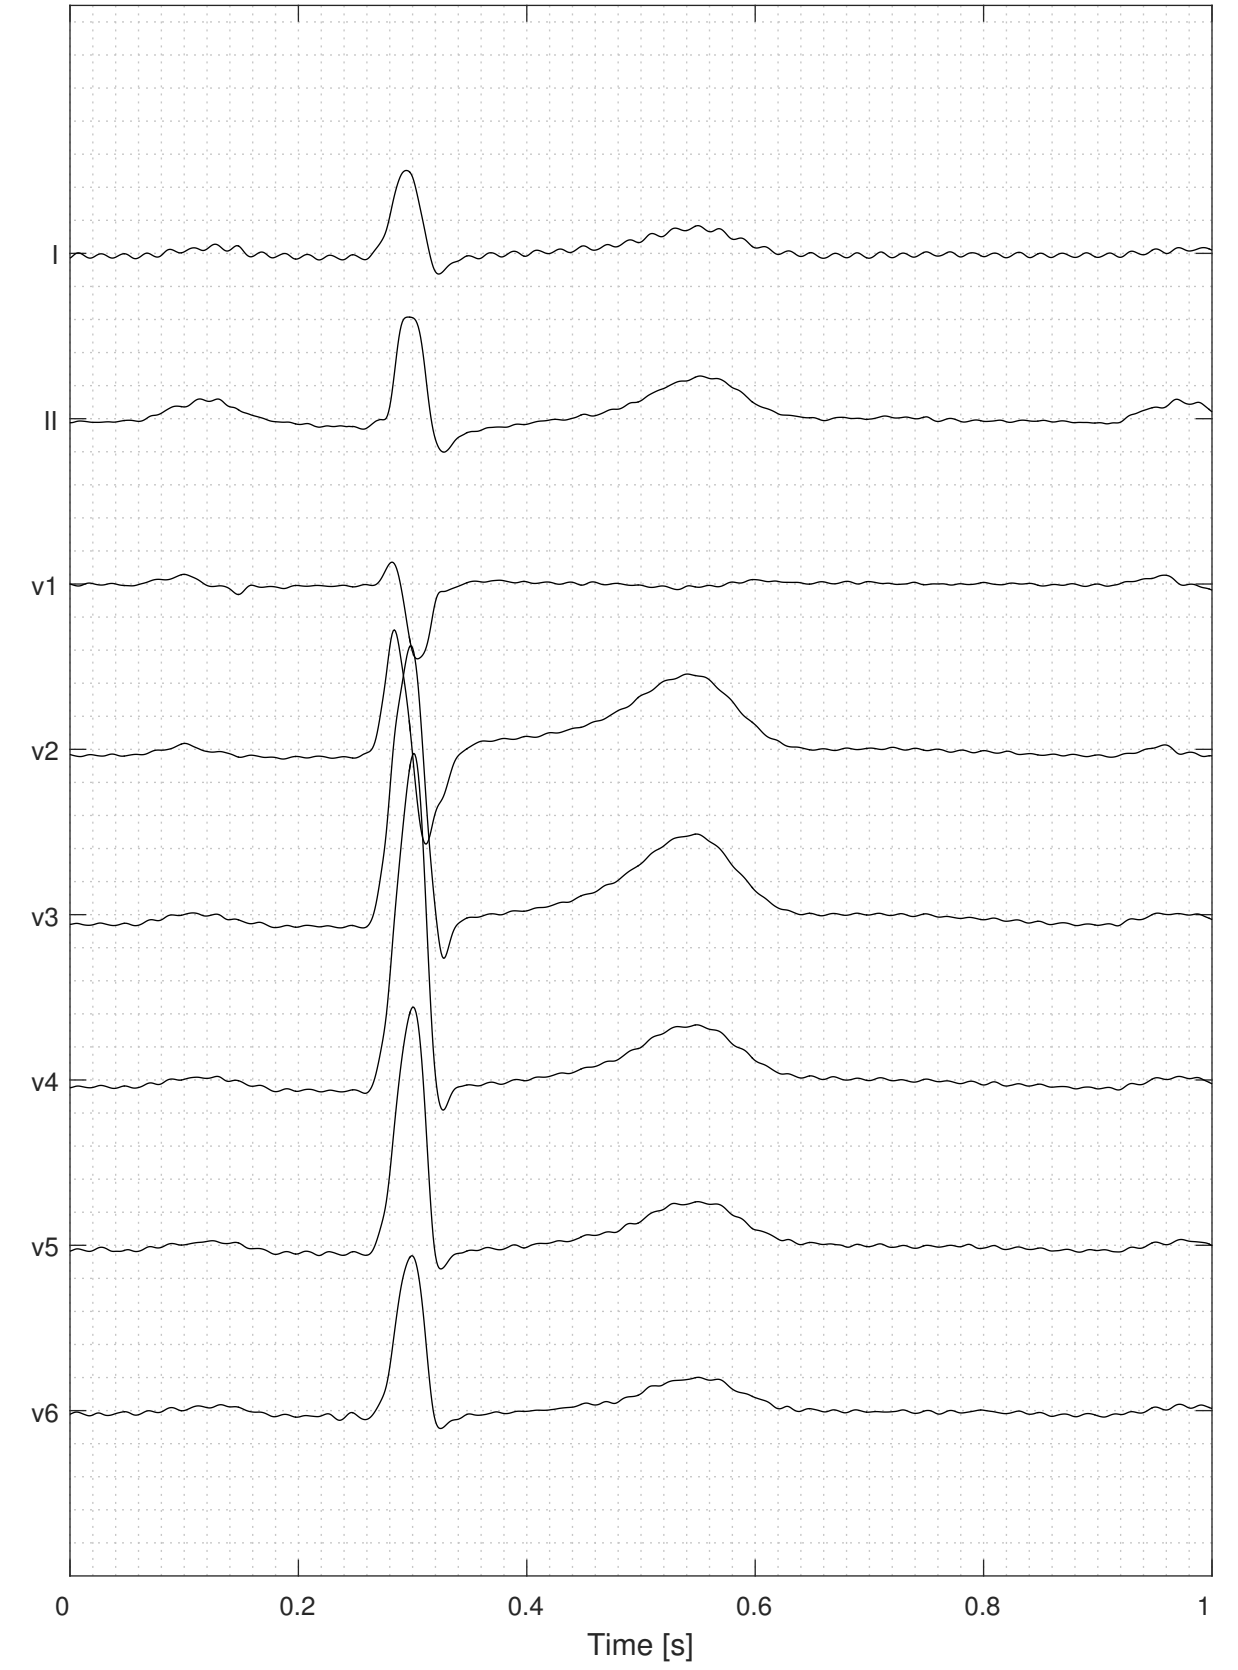

Patient 58

Low RR, Complex #: 180

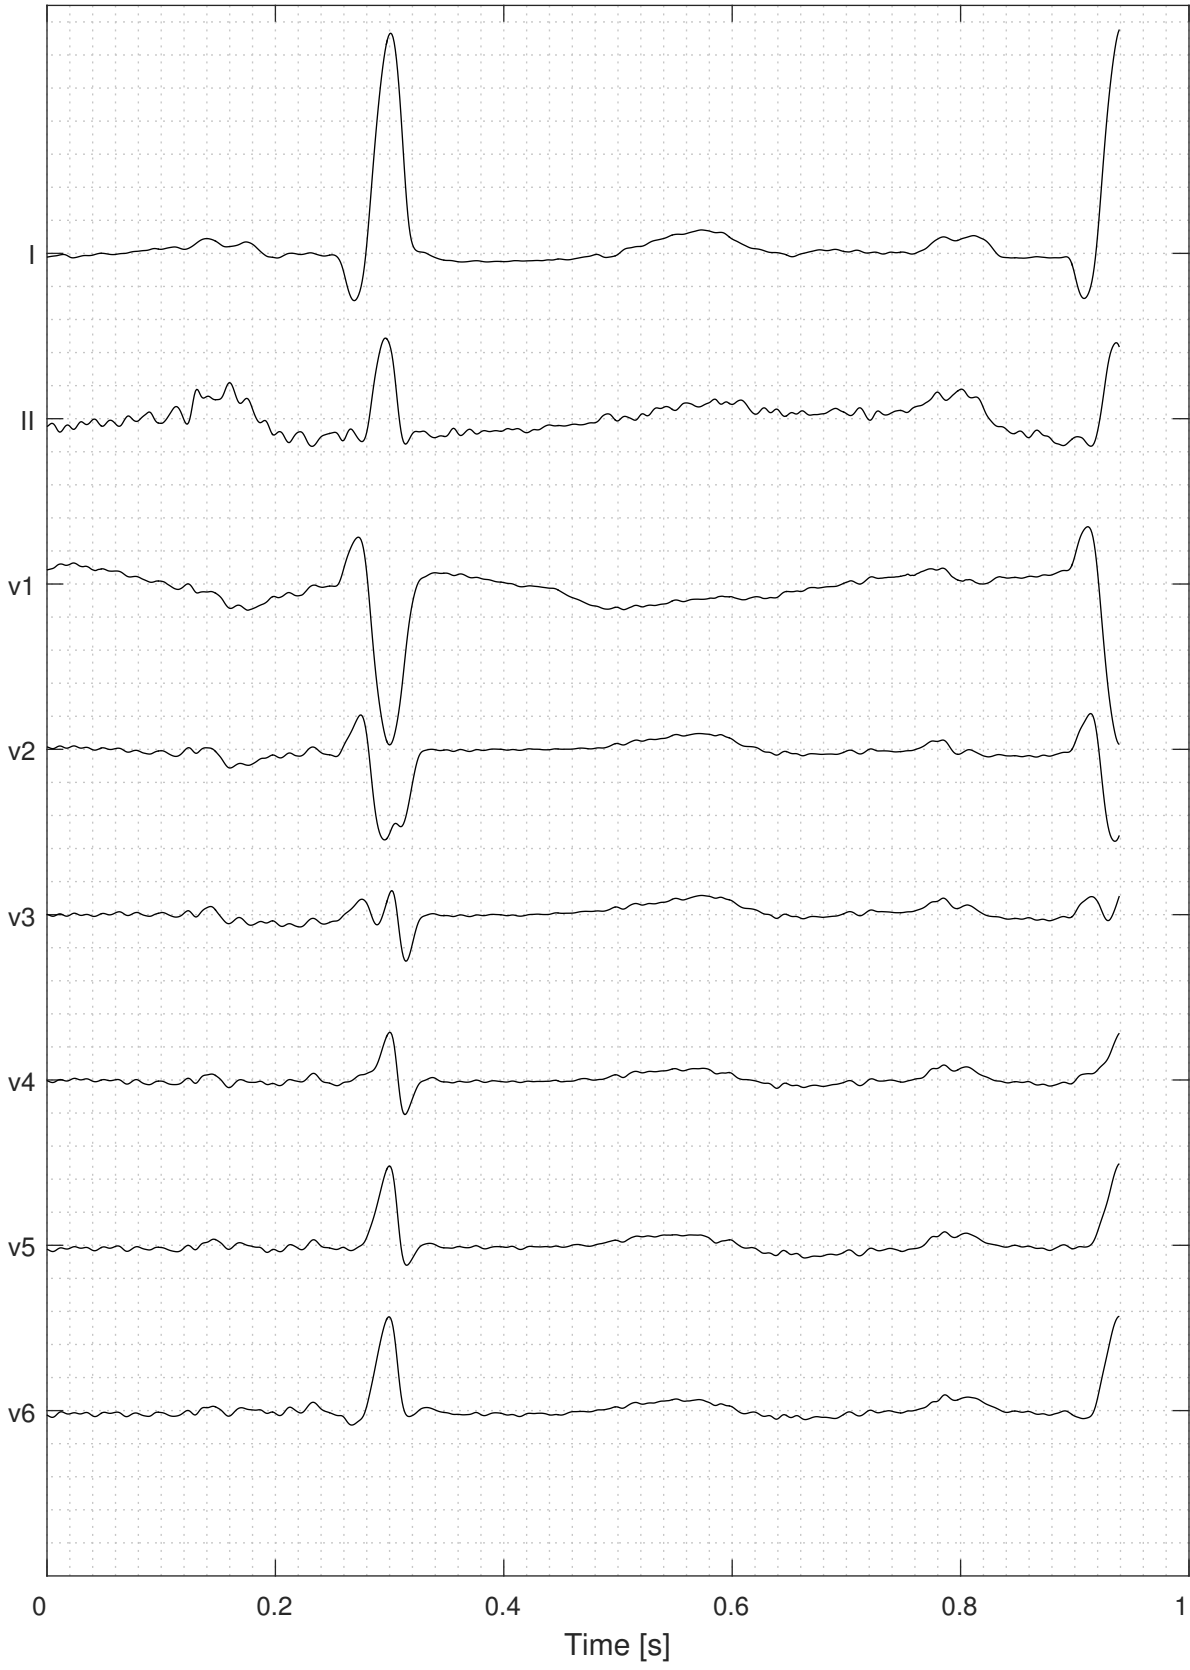

Mid RR, Complex #: 308

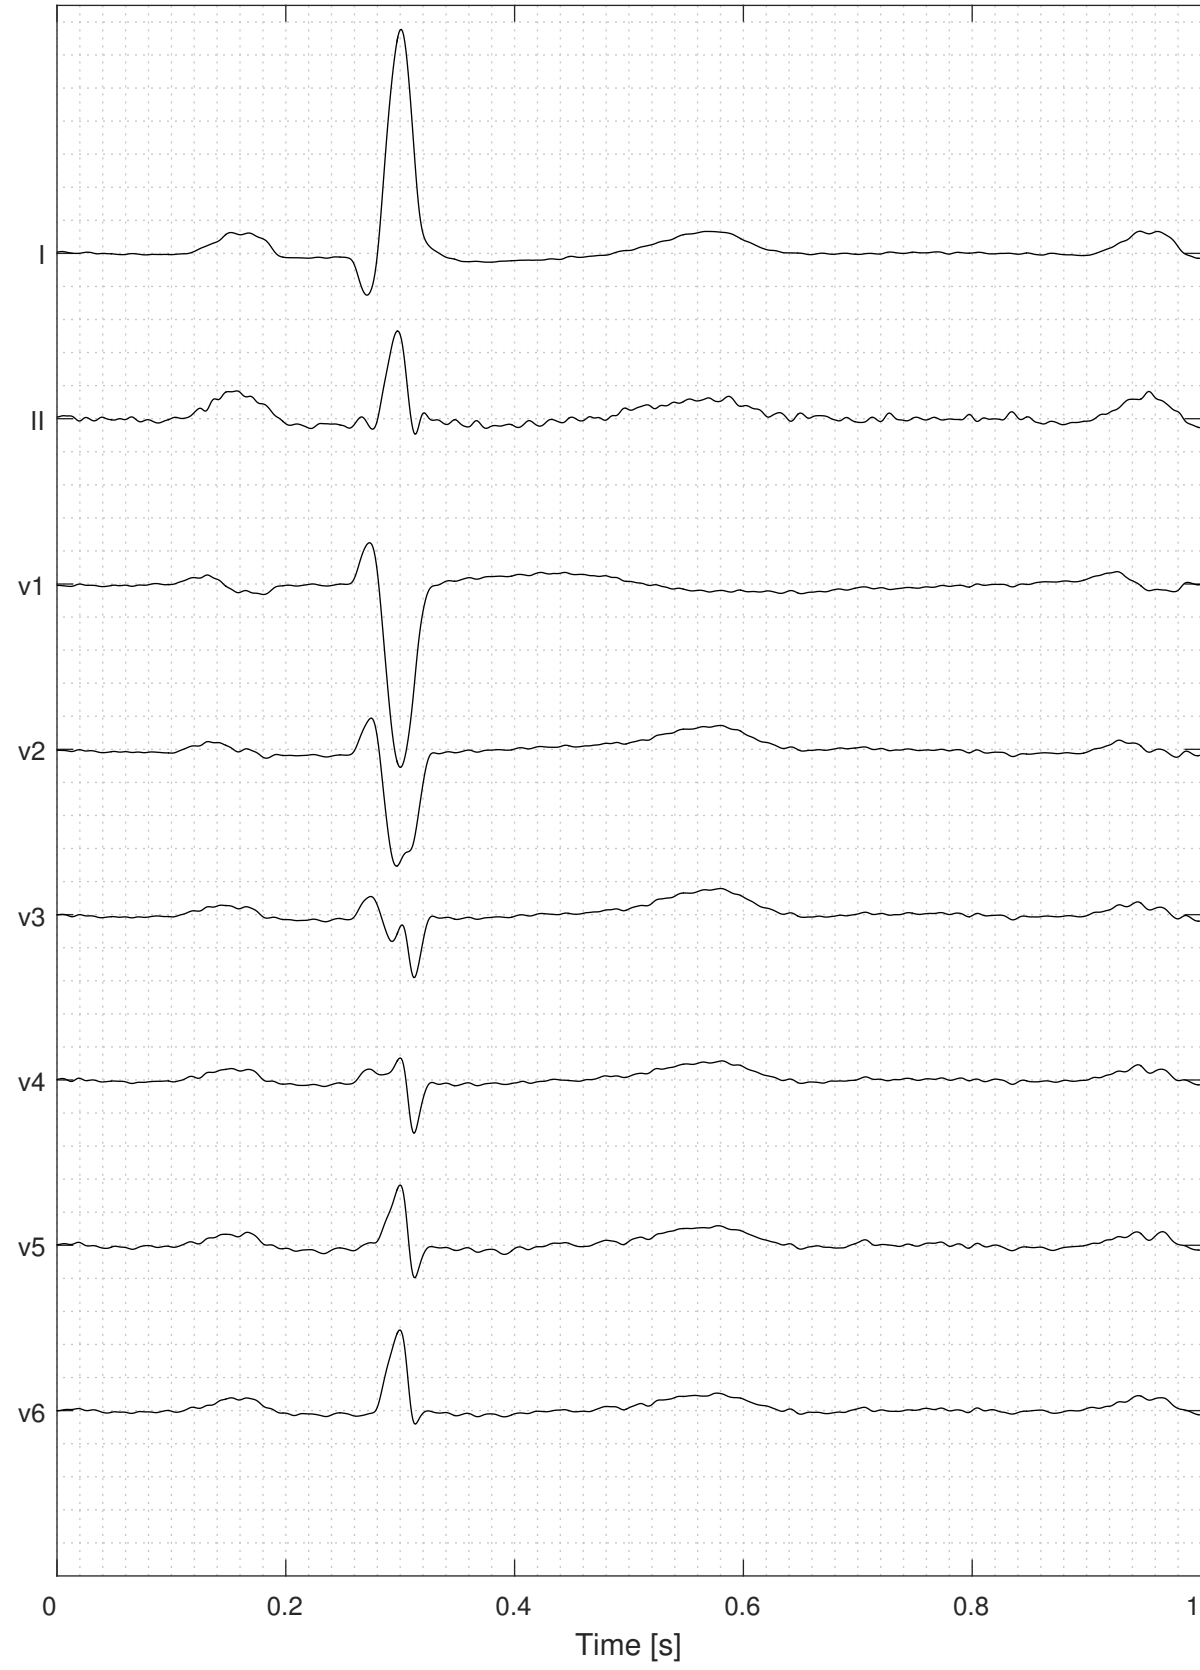

High RR, Complex #: 160

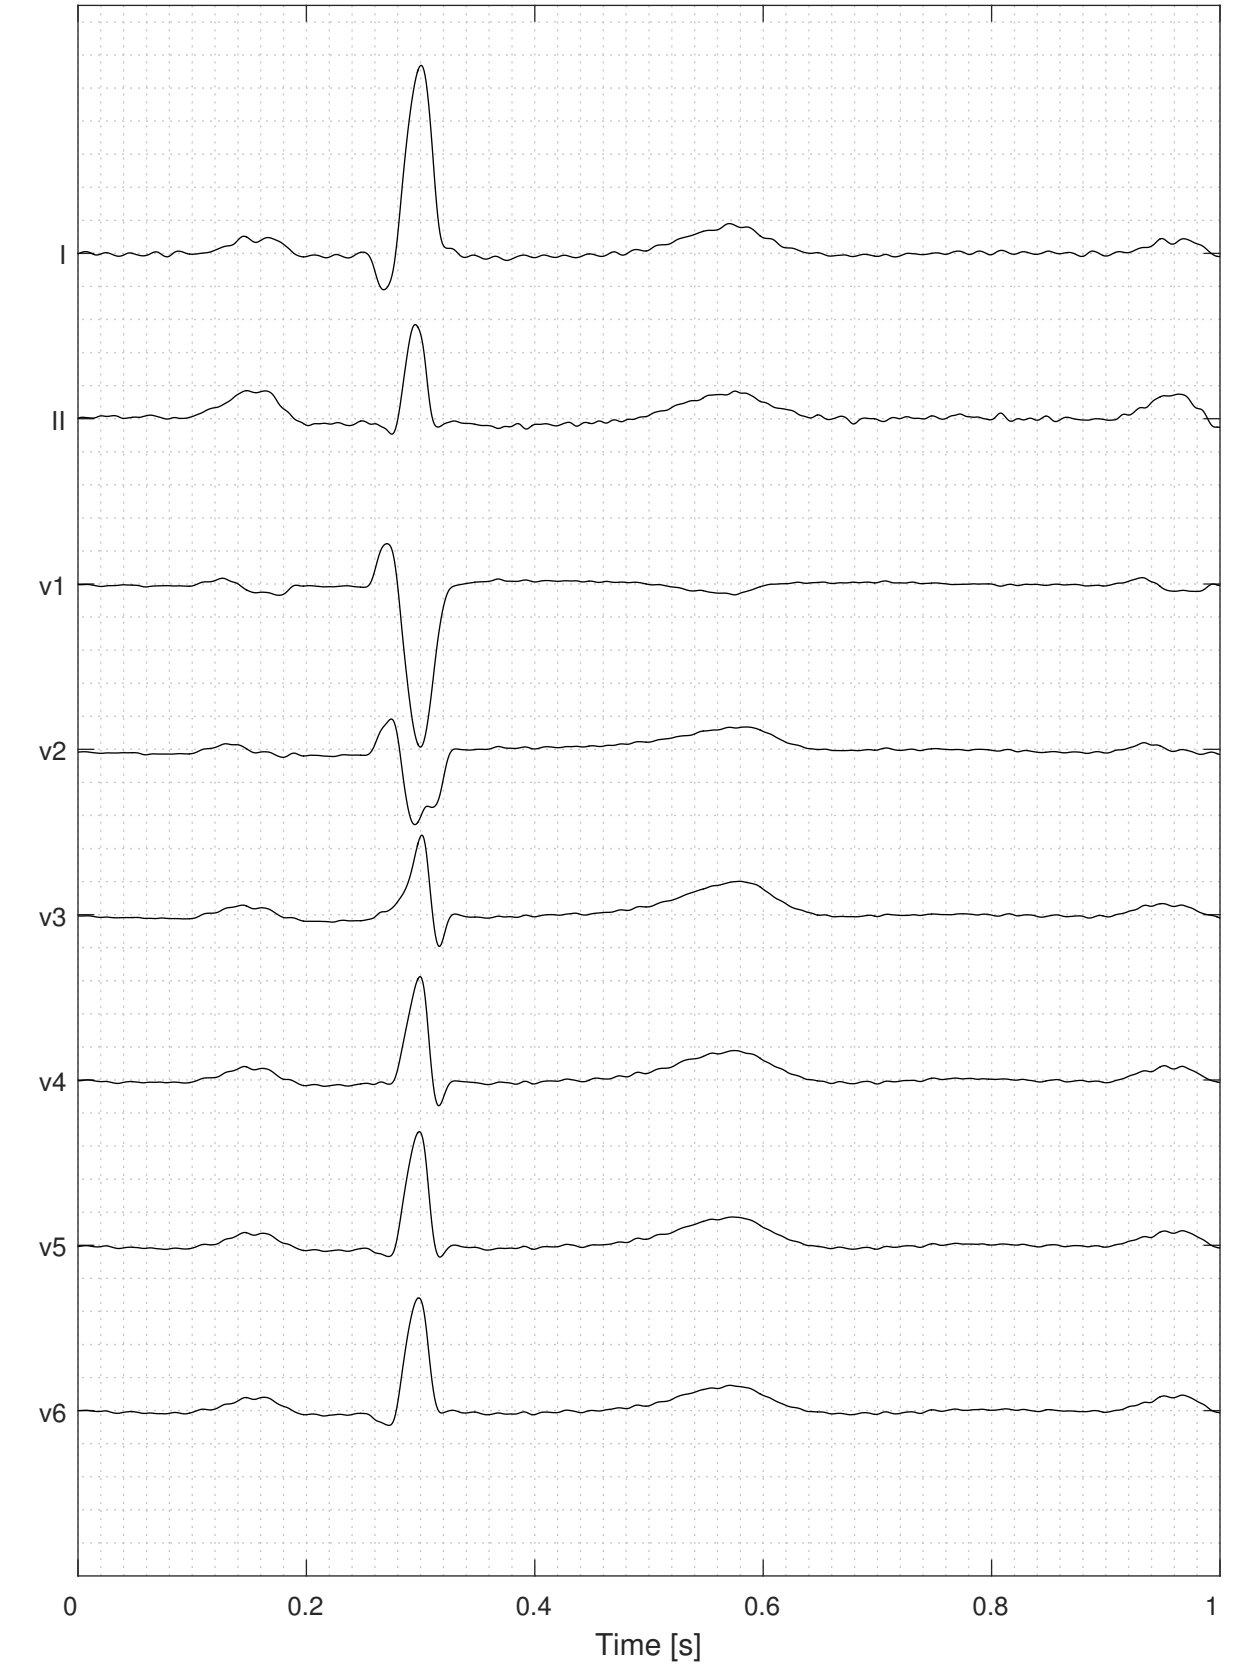

Patient 59

Low RR, Complex #: 309

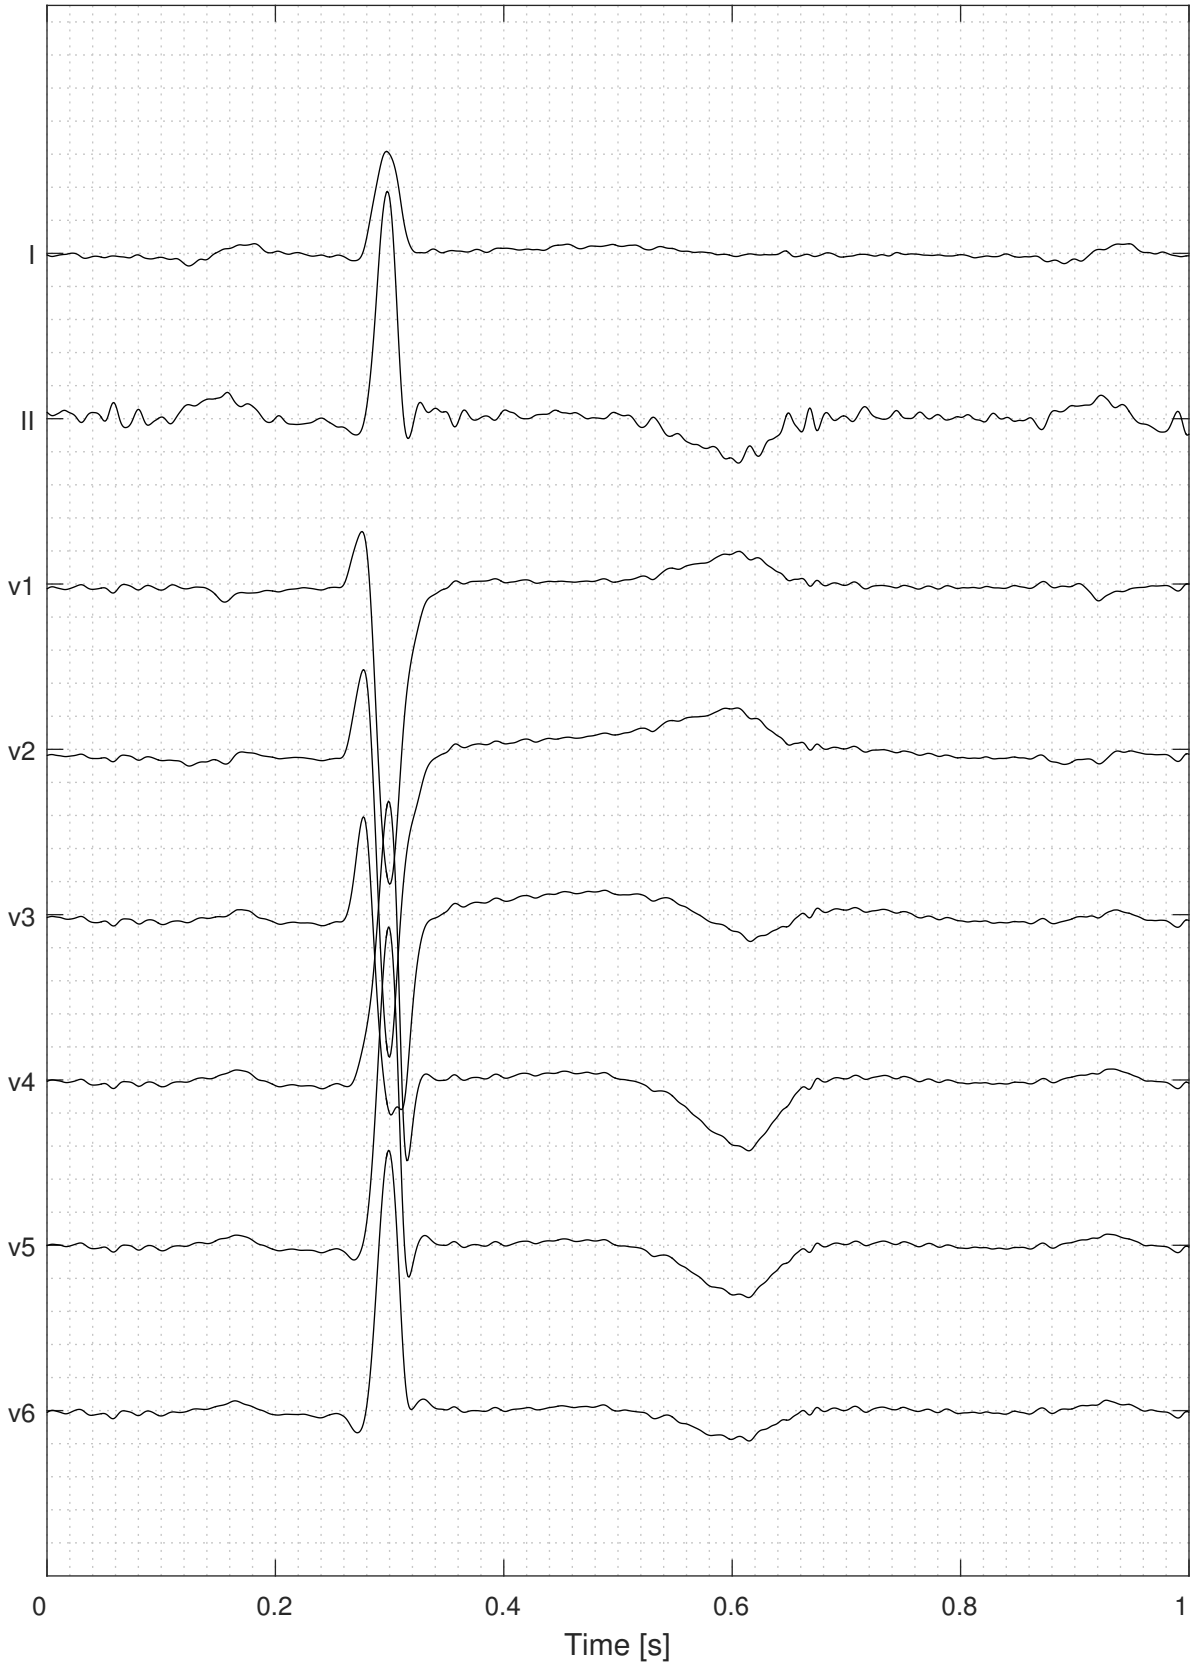

Mid RR, Complex #: 320

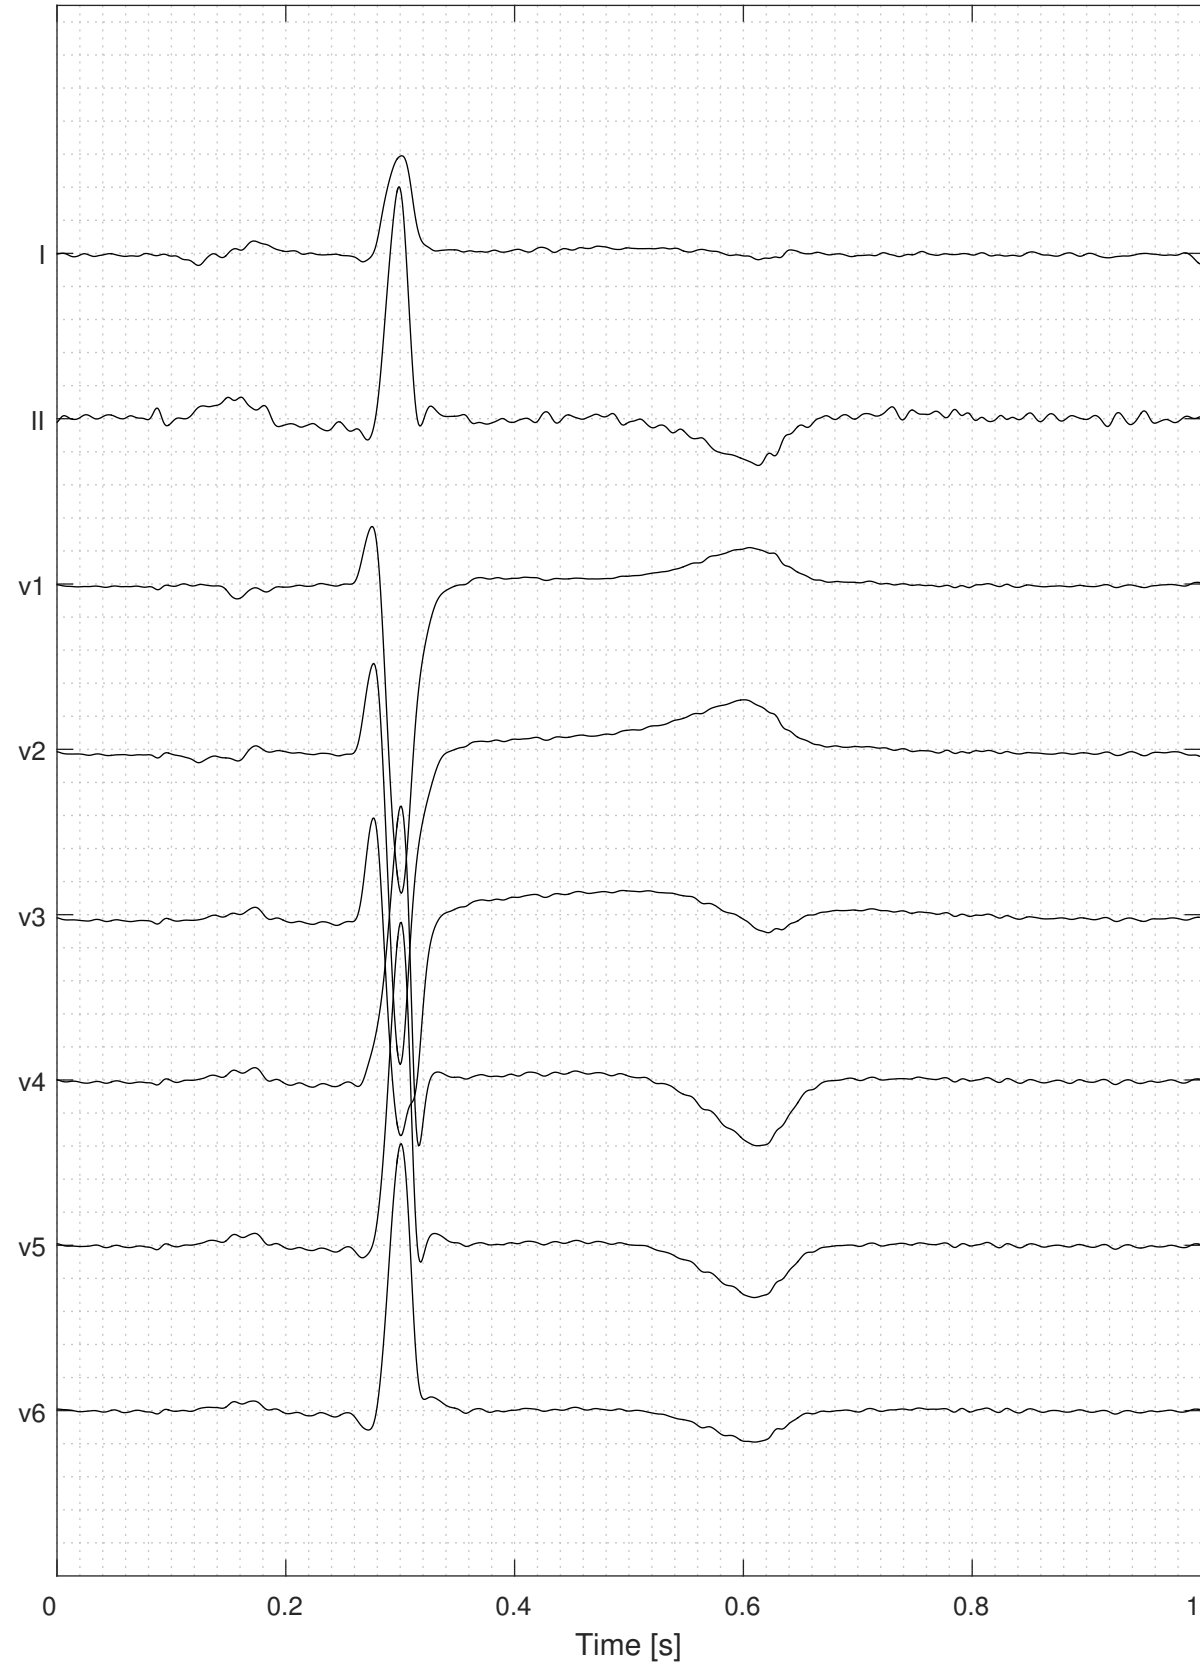

High RR, Complex #: 103

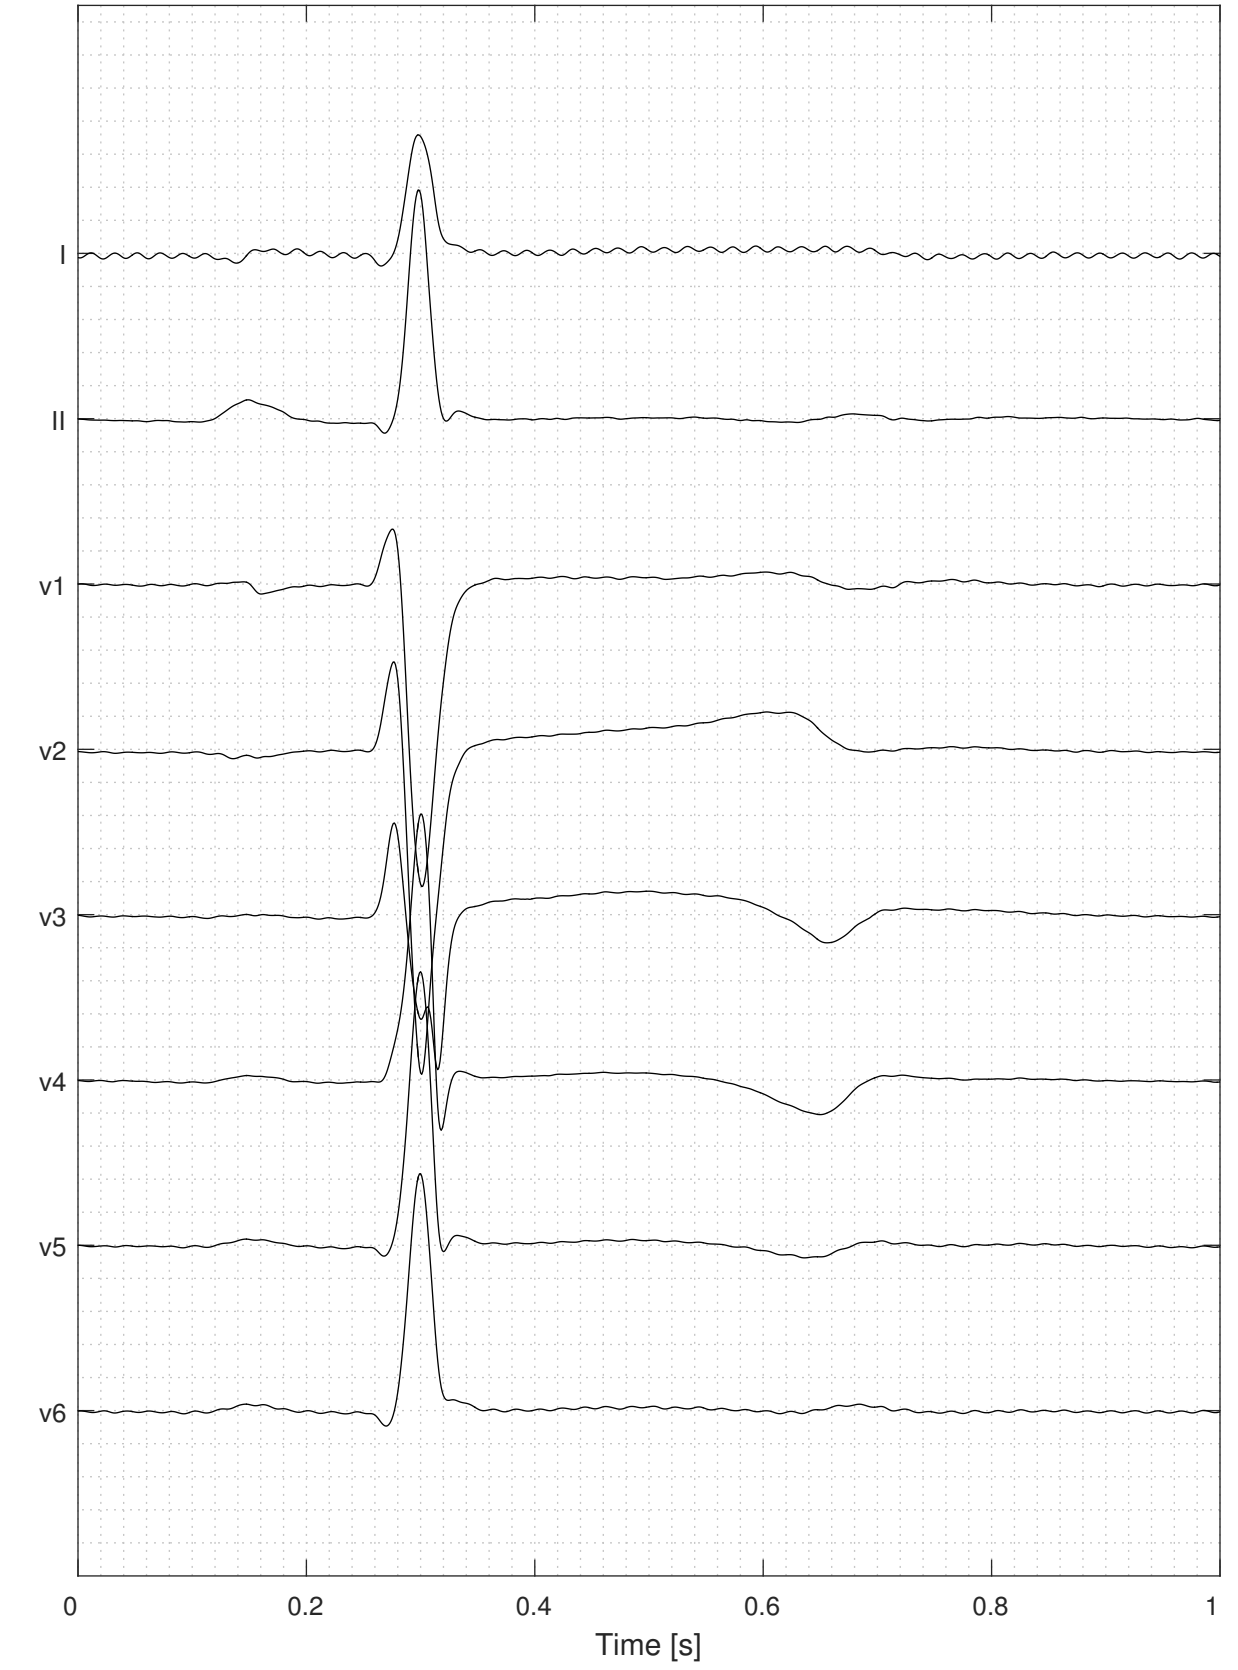

Patient 60

Low RR, Complex #: 107

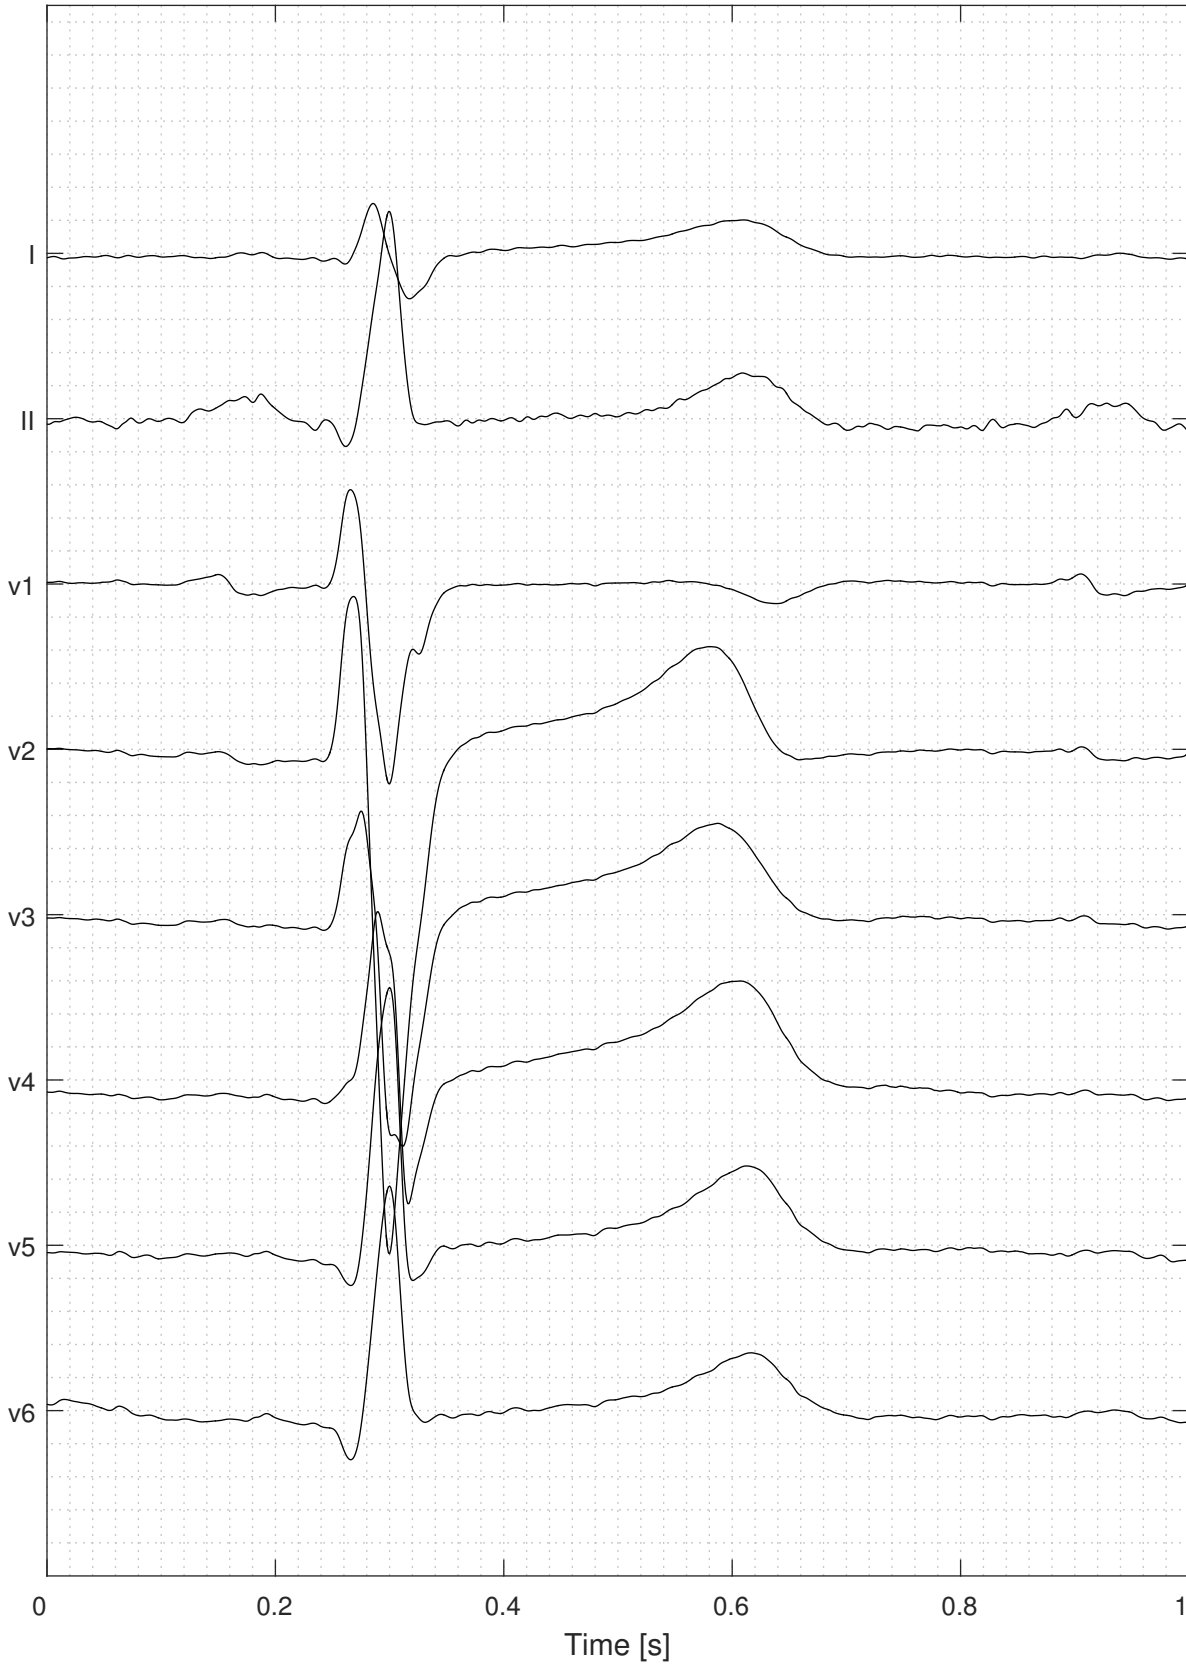

Mid RR, Complex #: 124

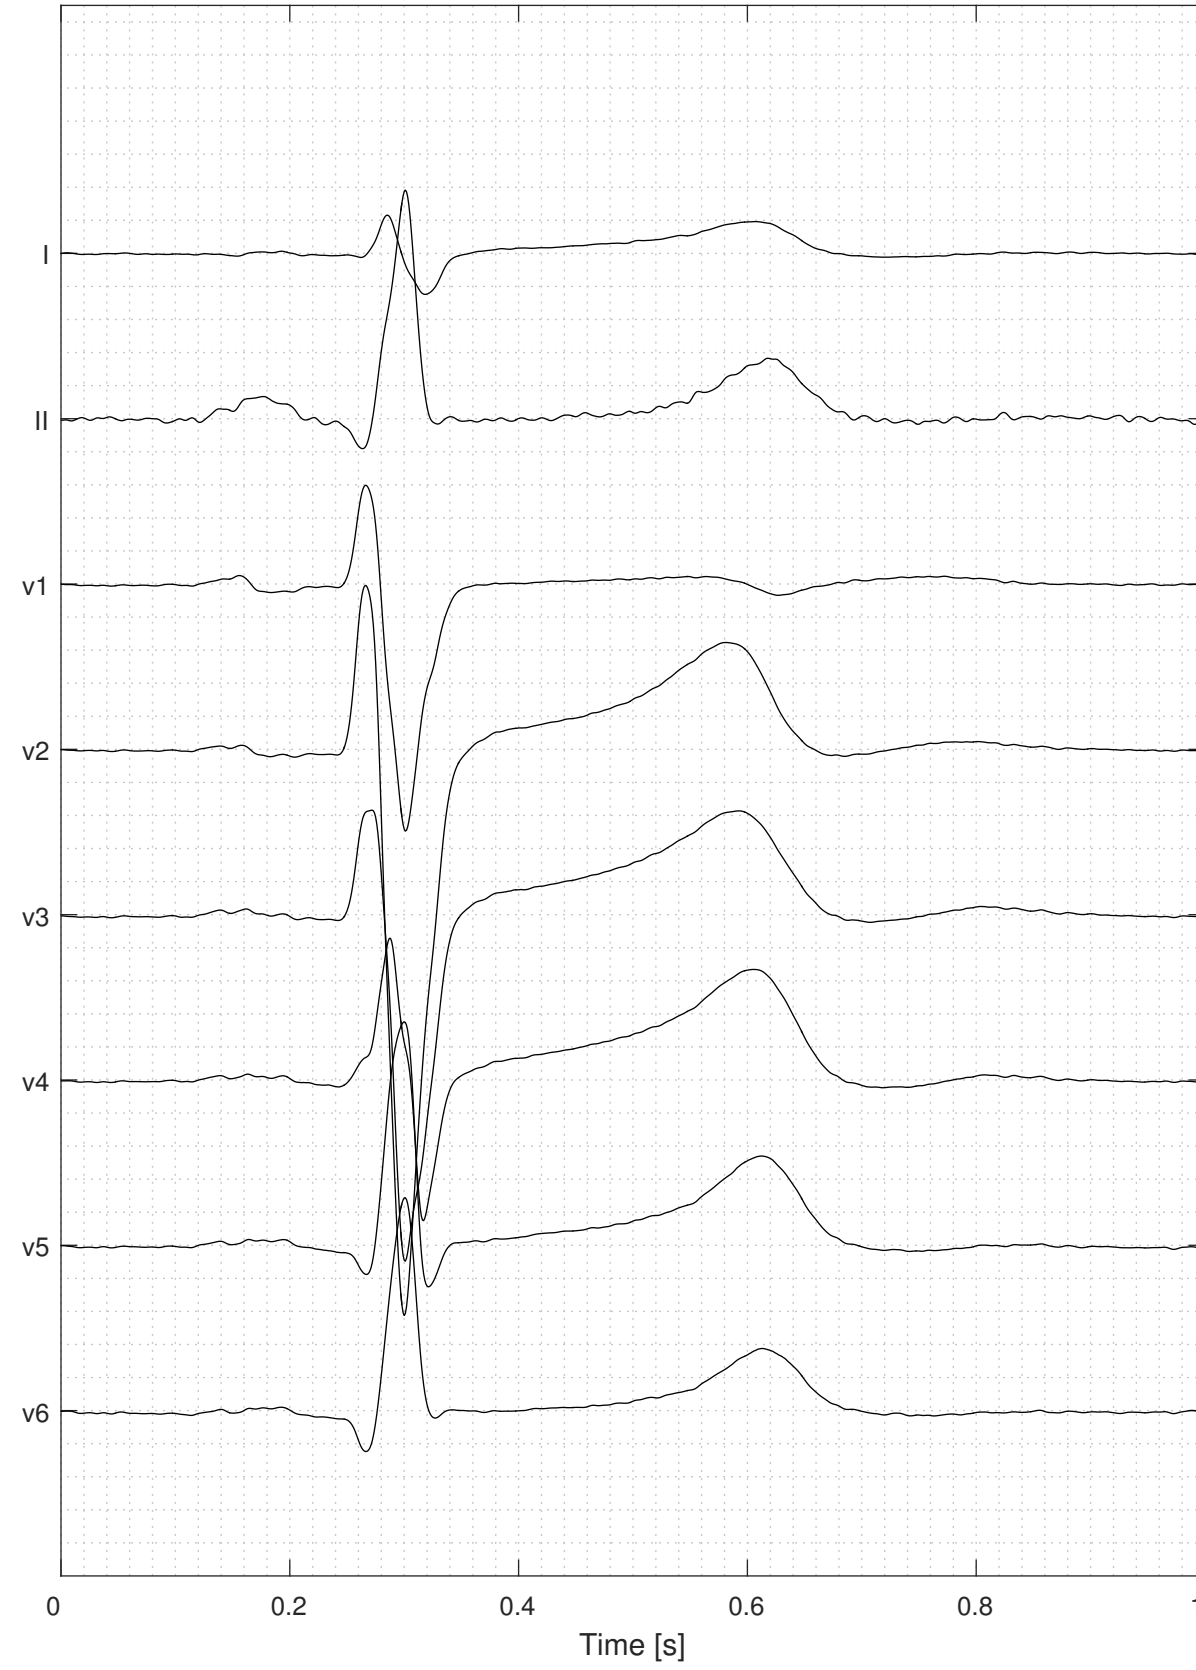

High RR, Complex #: 32

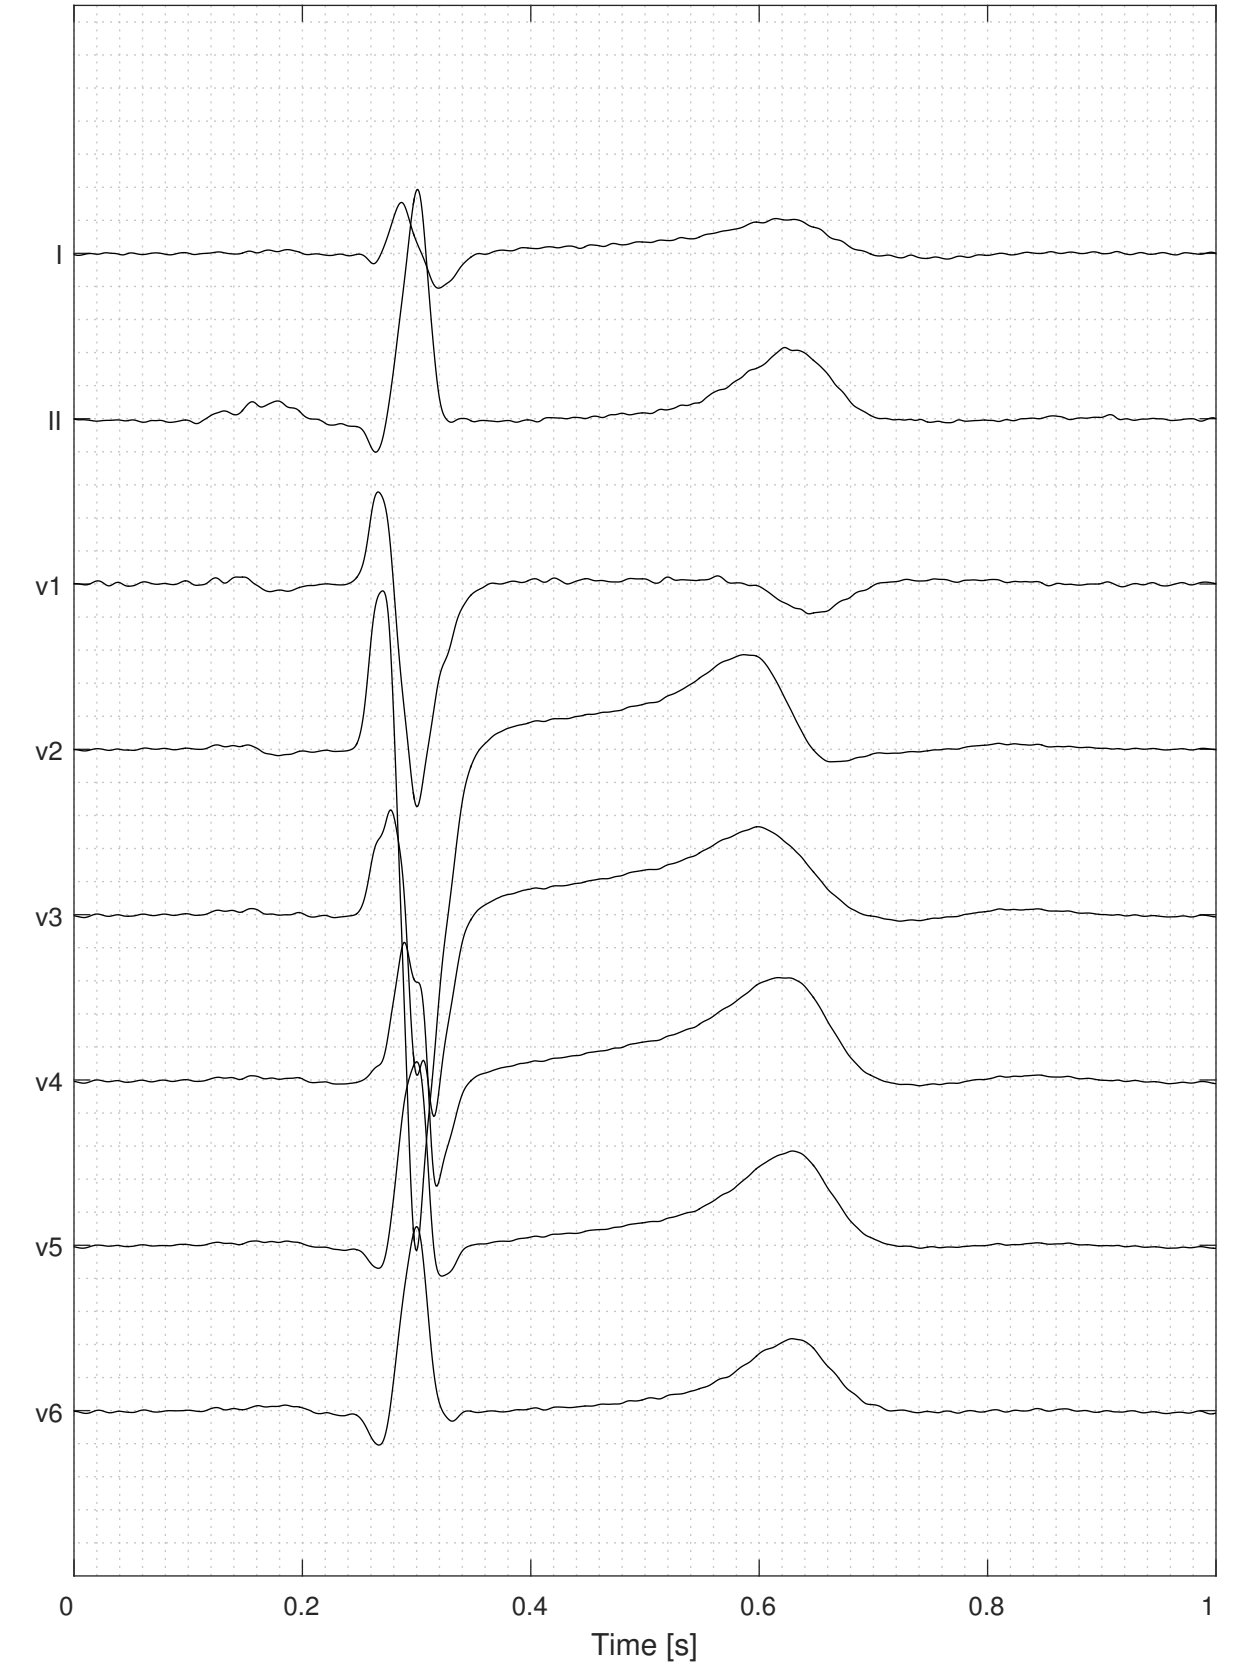

Patient 61

Low RR, Complex #: 318

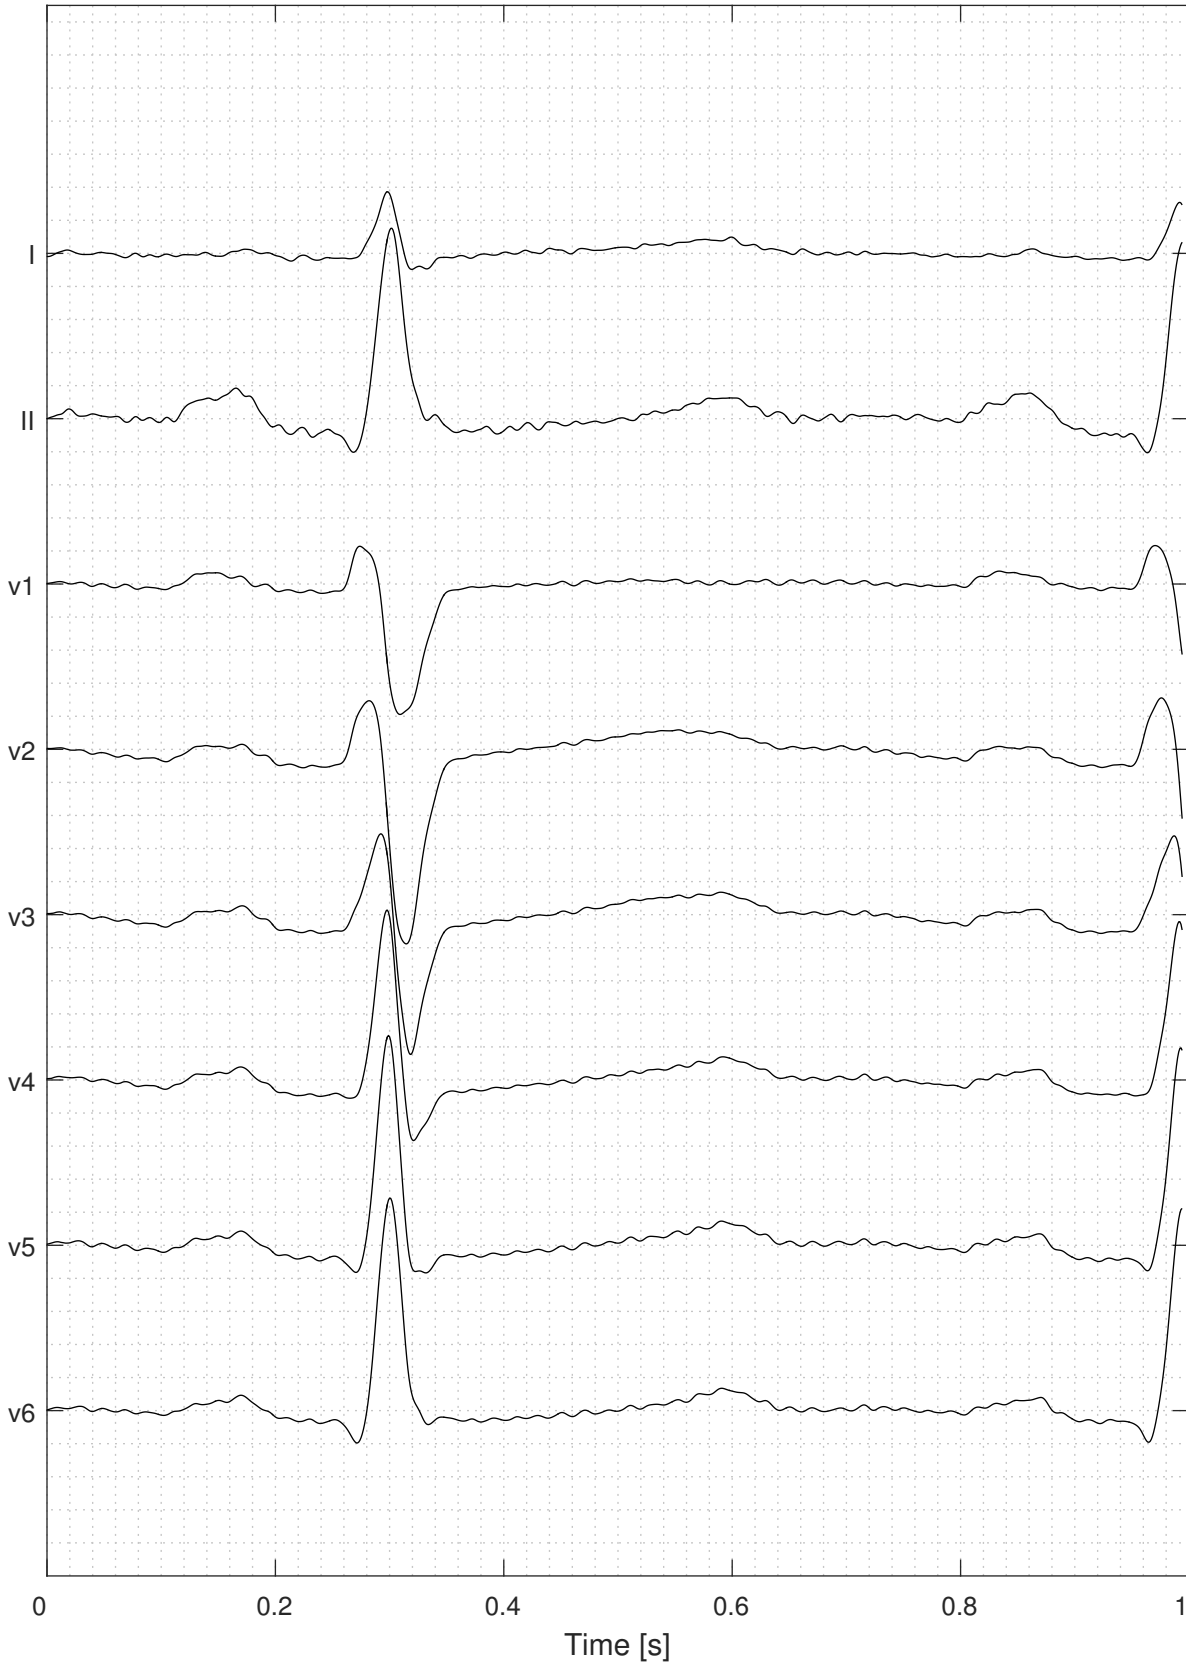

Mid RR, Complex #: 254

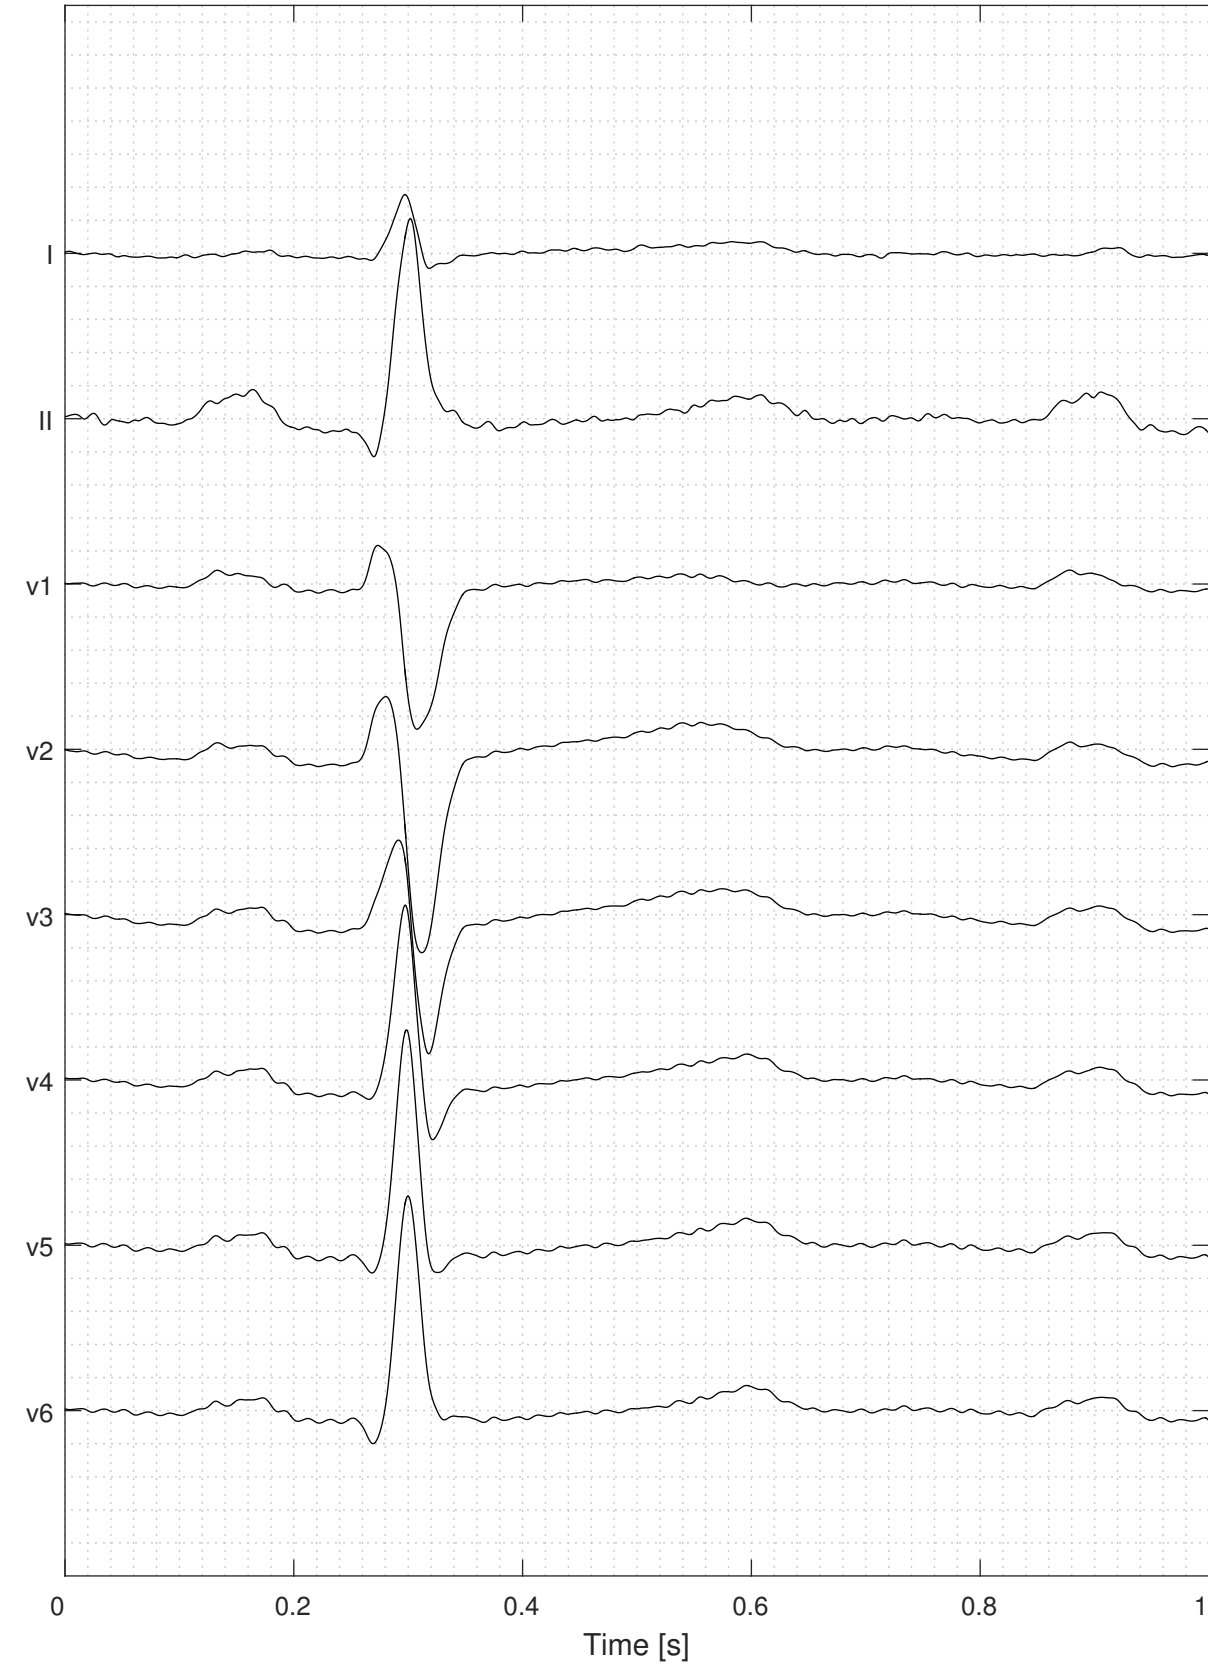

High RR, Complex #: 79

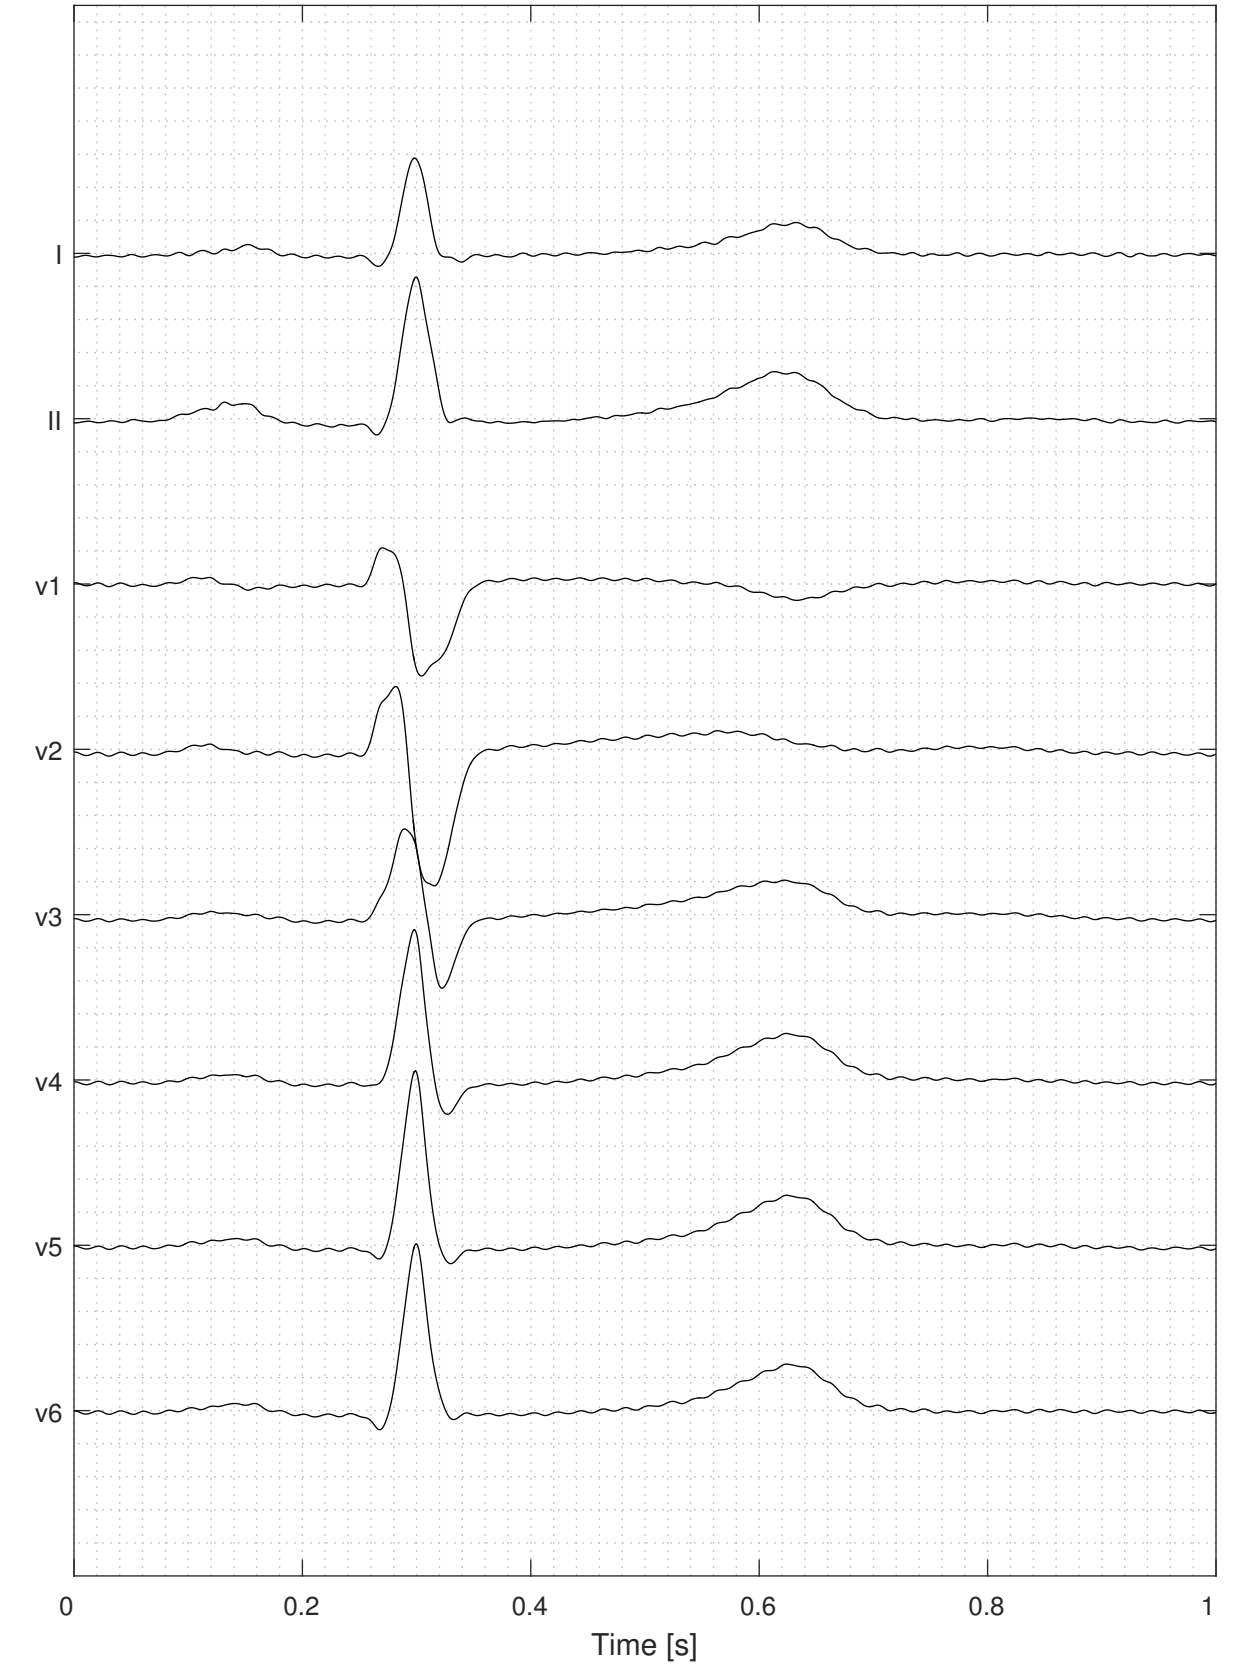

Patient 62

Low RR, Complex #: 109

Mid RR, Complex #: 35

High RR, Complex #: 3

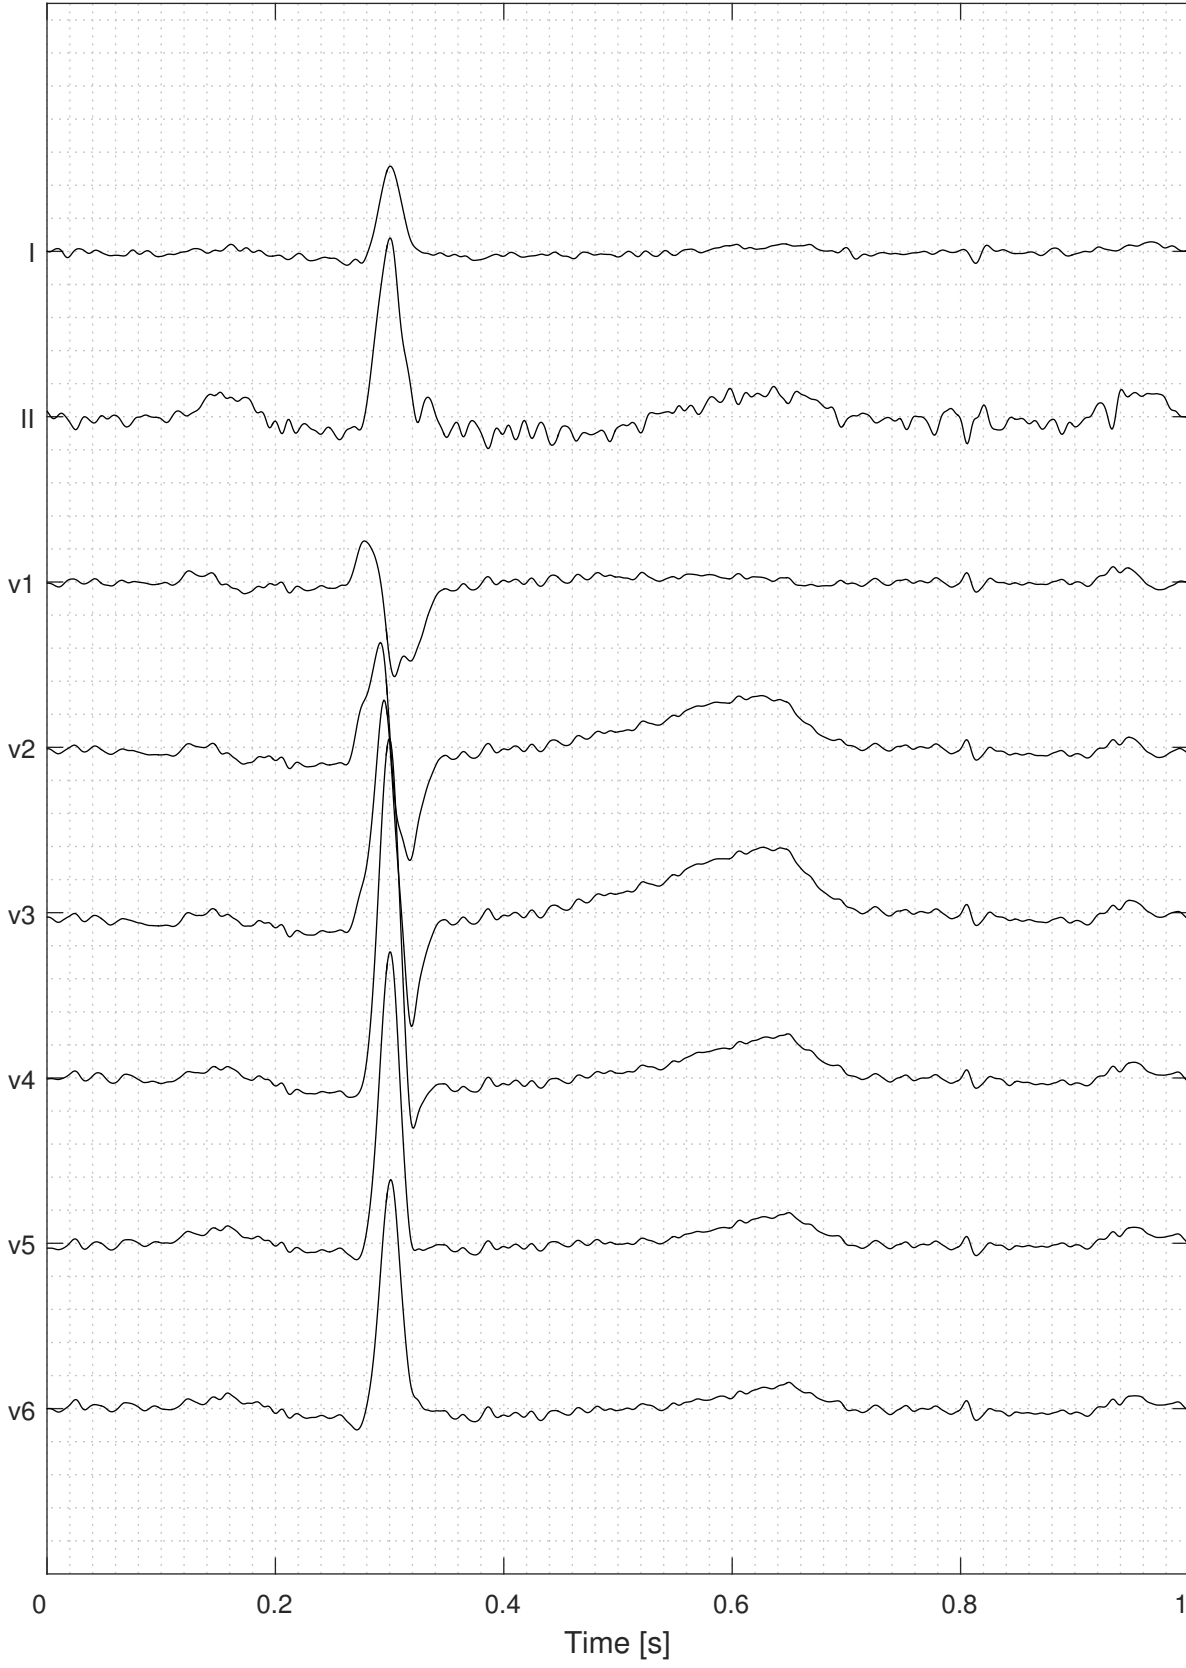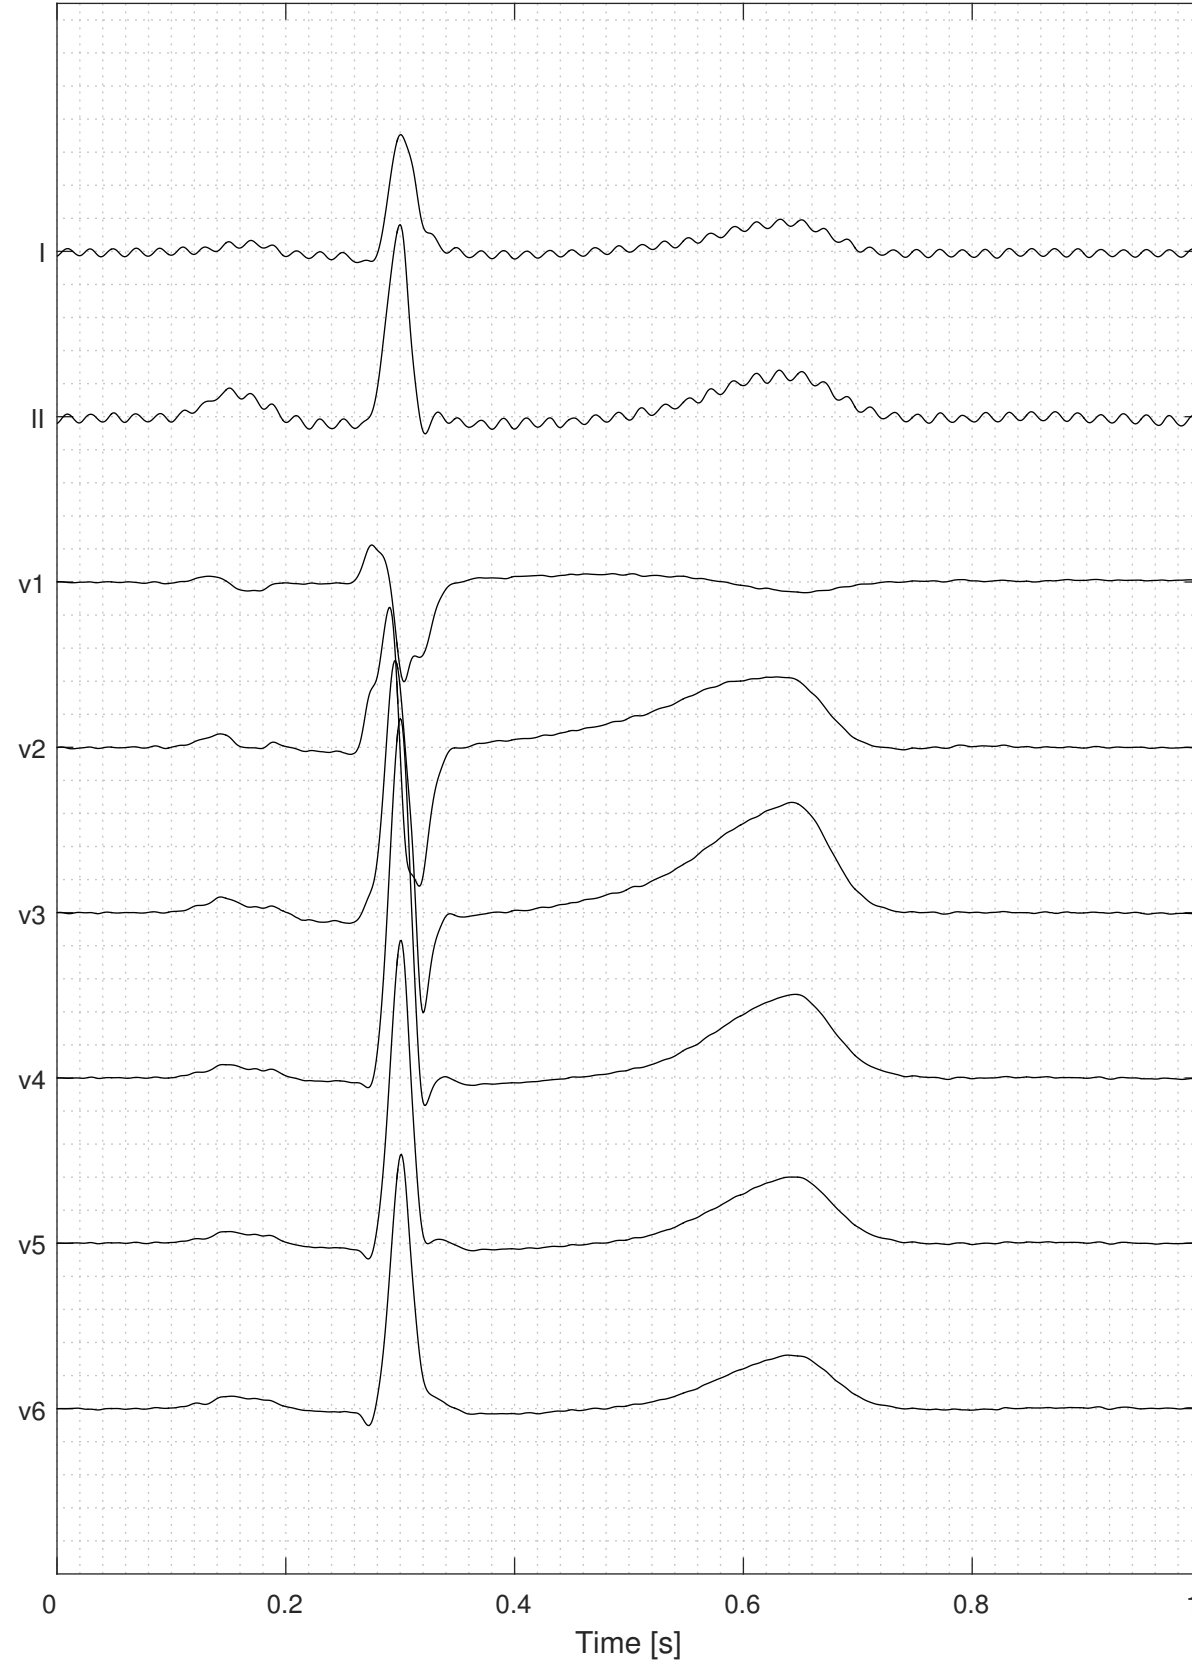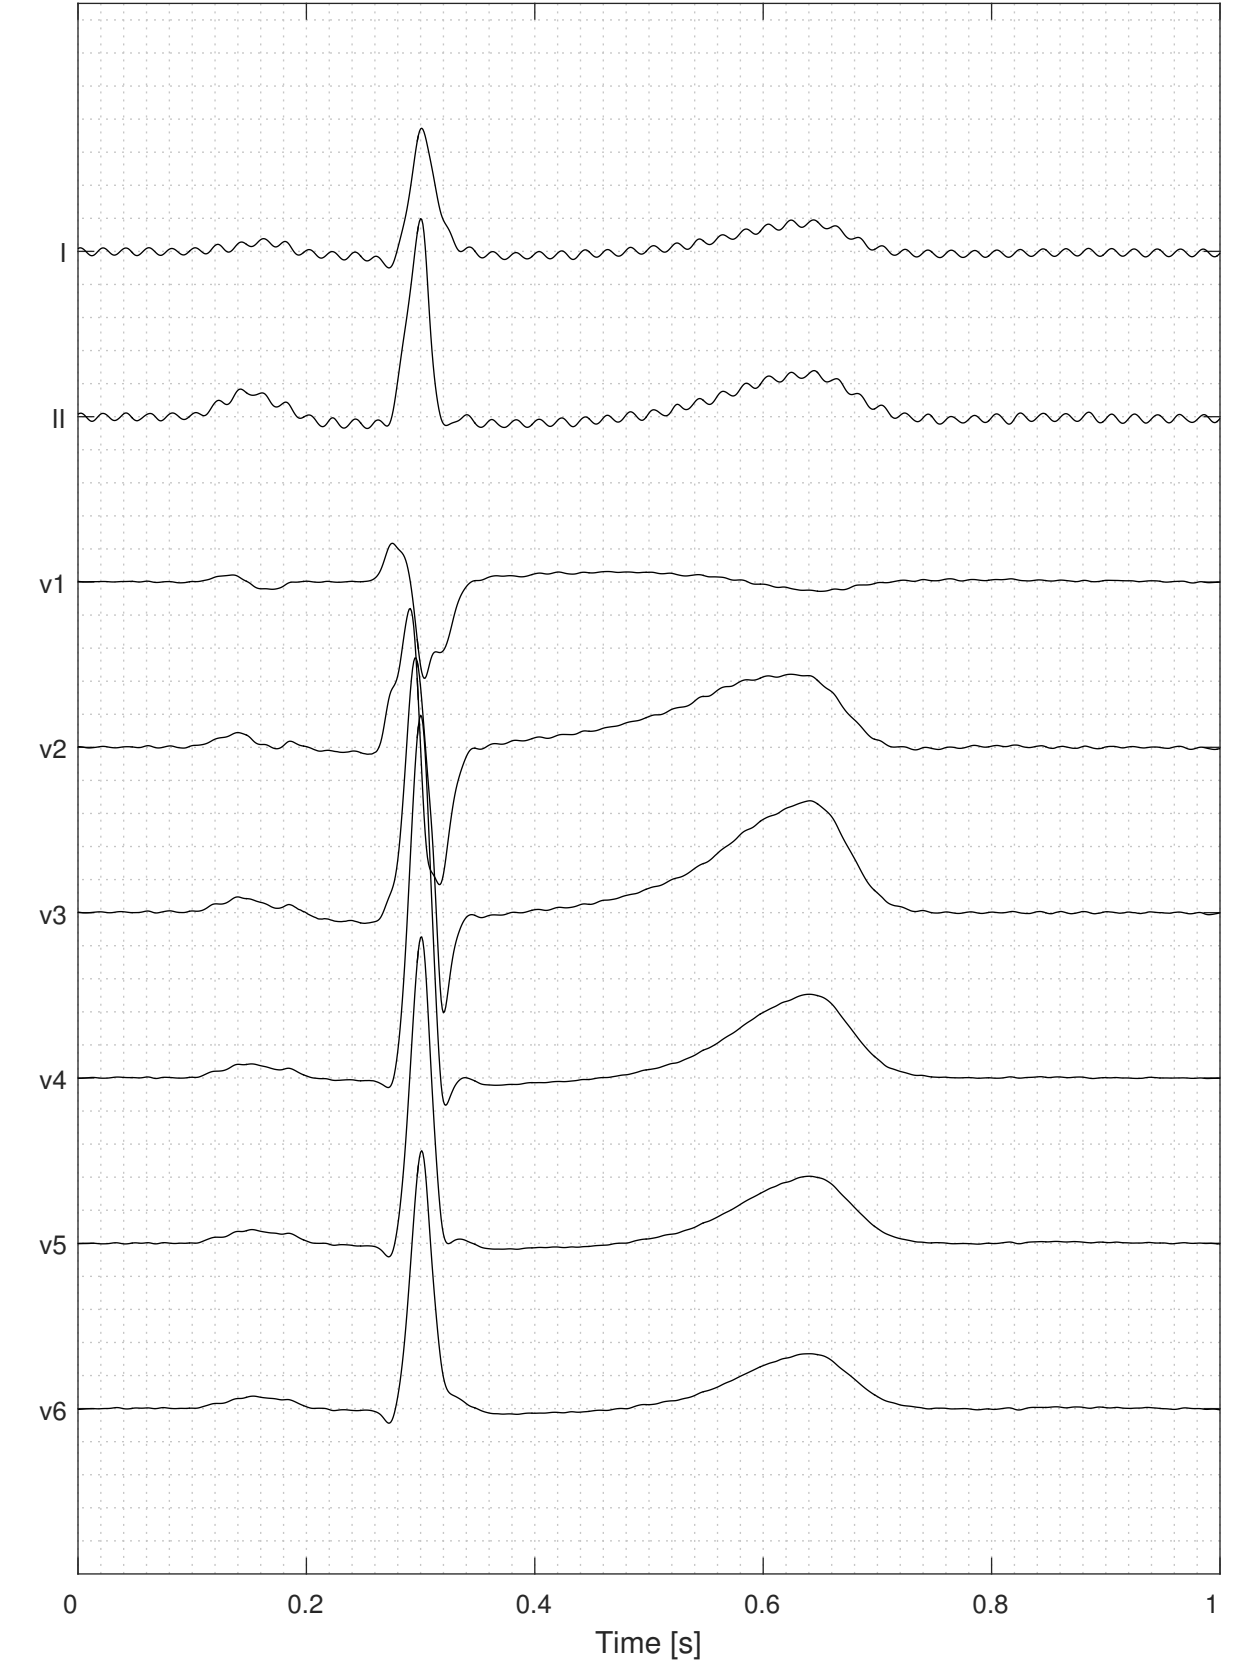

Patient 63

Low RR, Complex #: 319

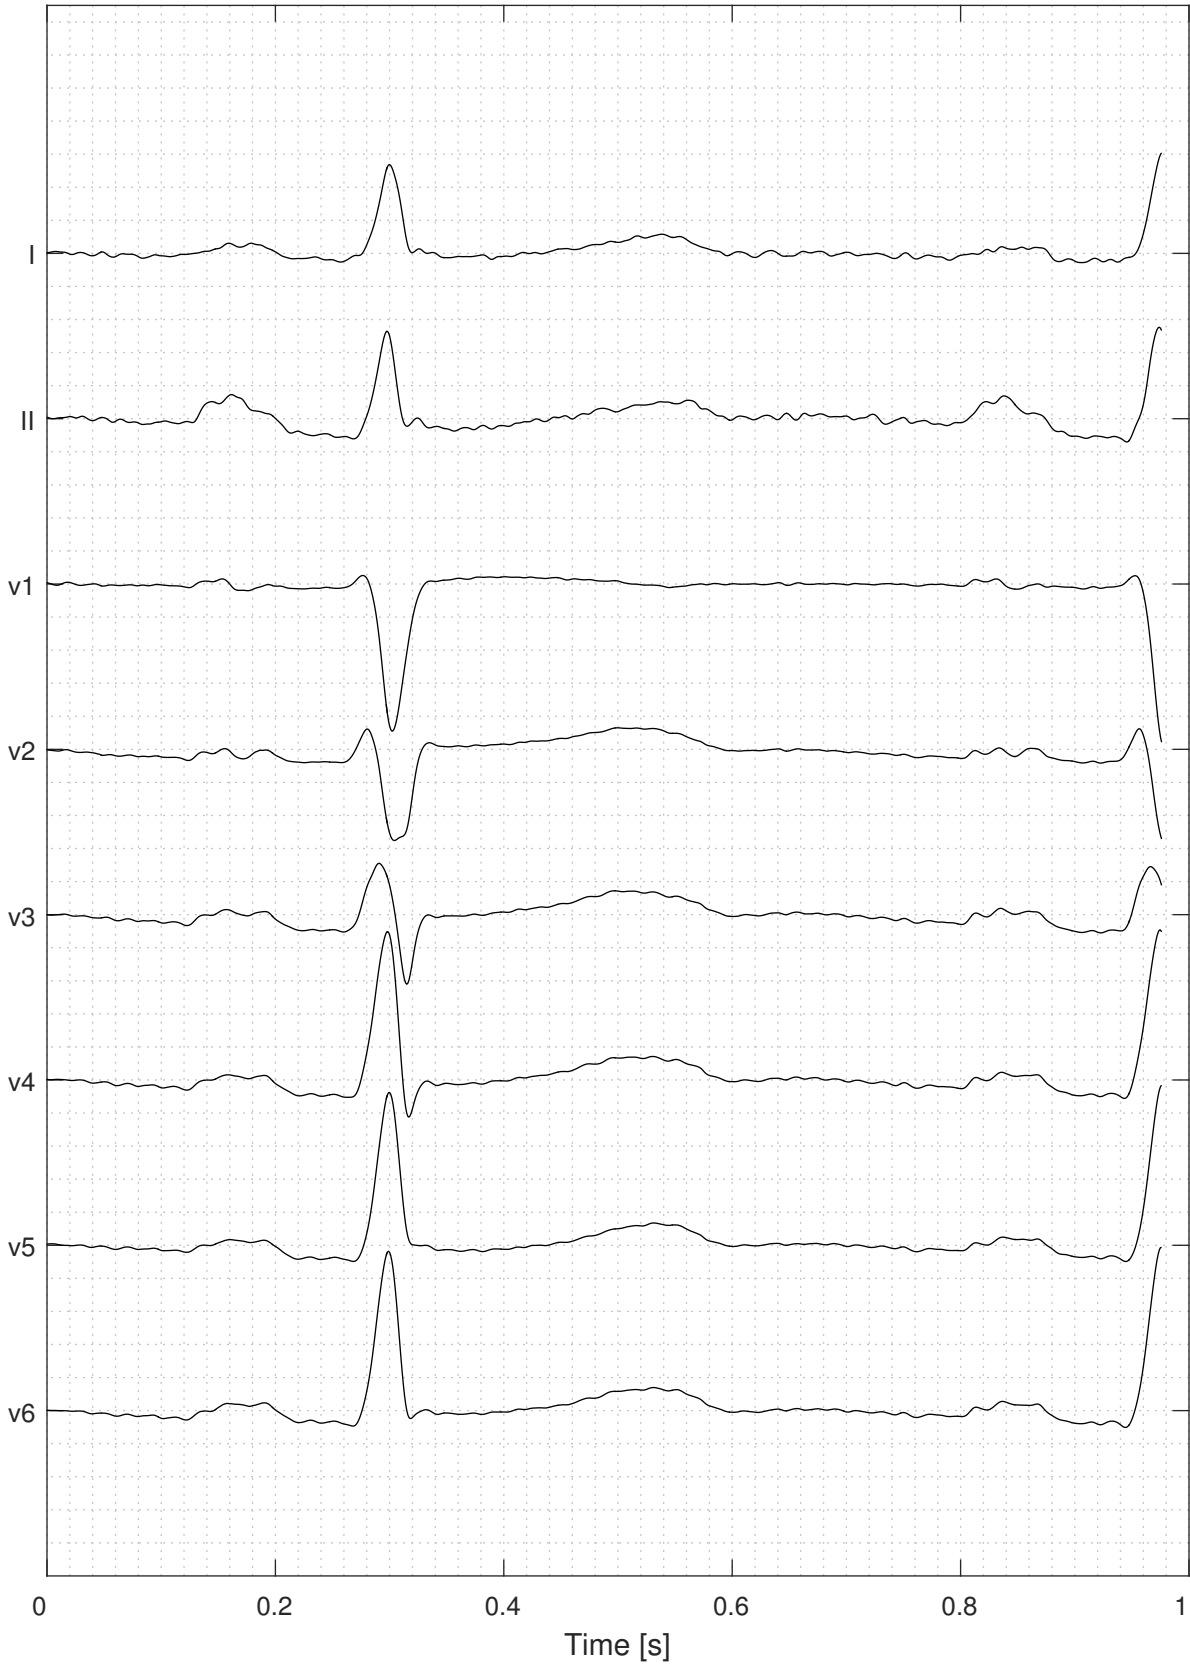

Mid RR, Complex #: 130

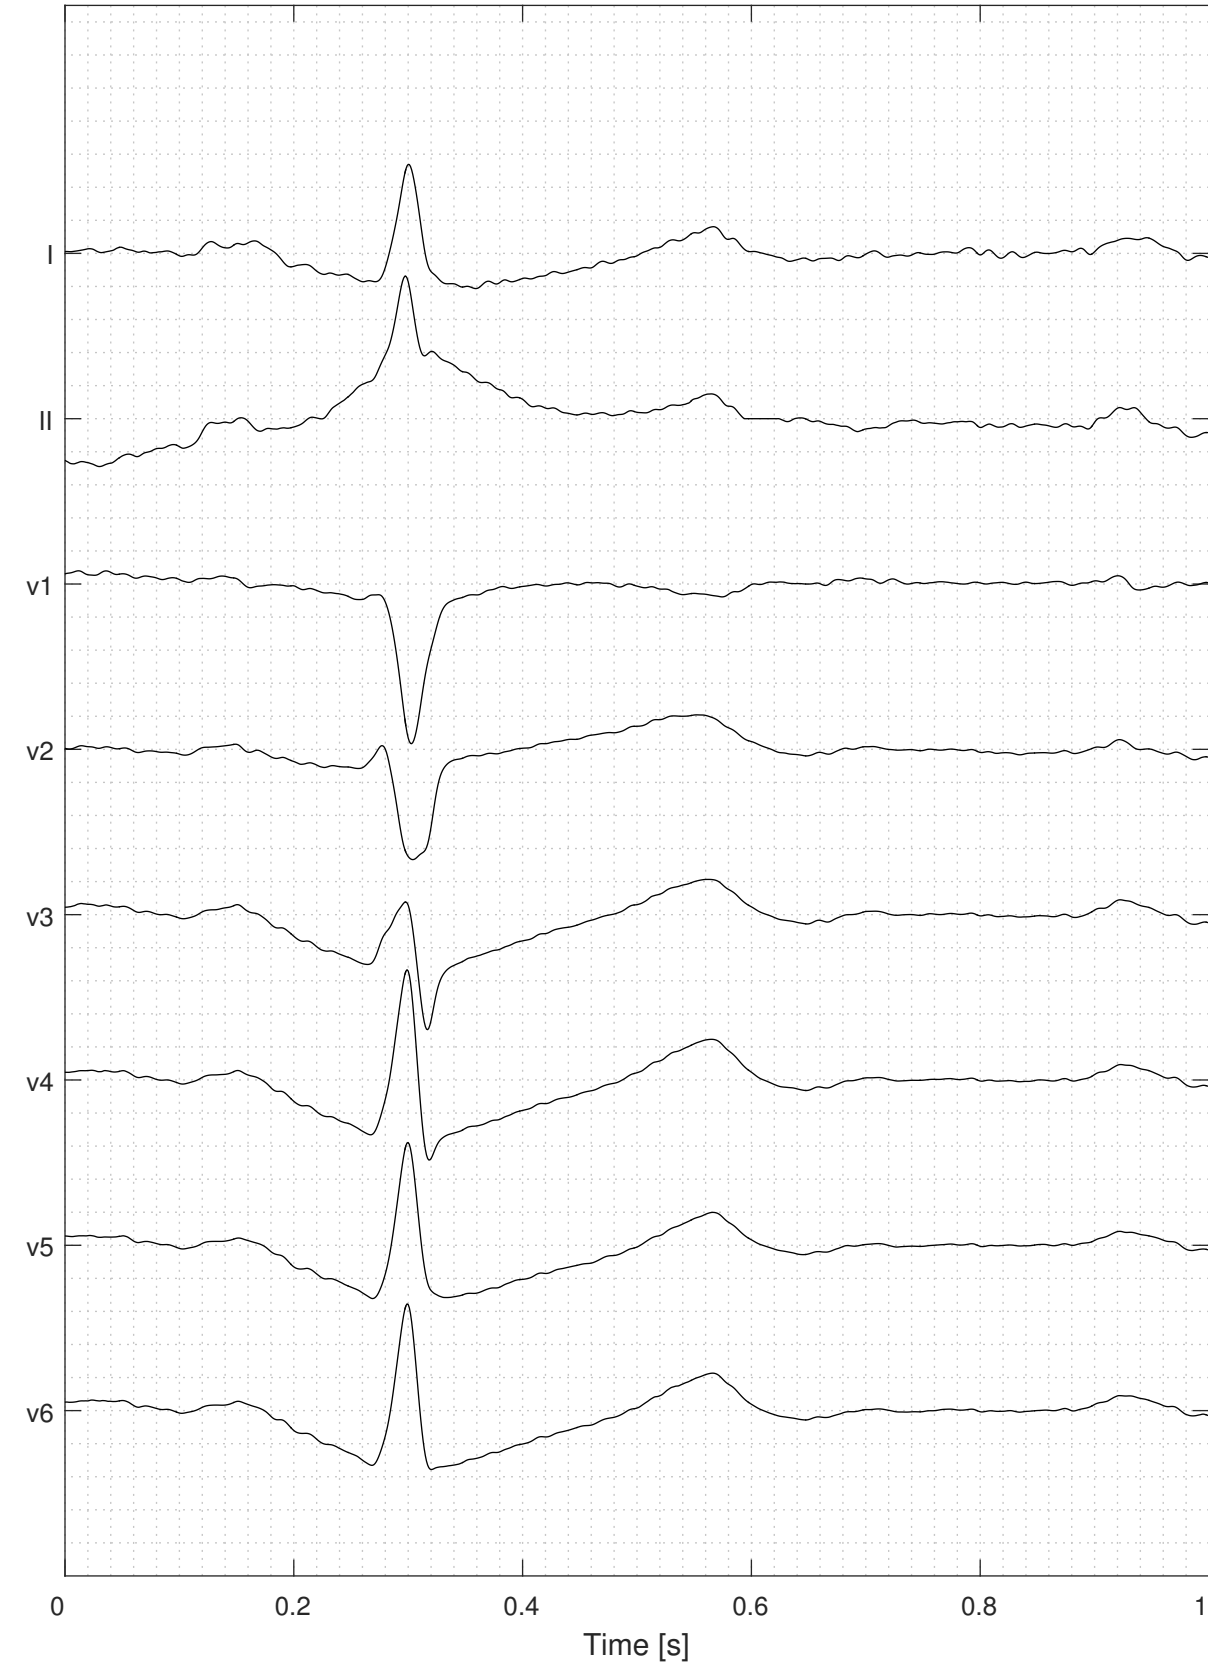

High RR, Complex #: 32

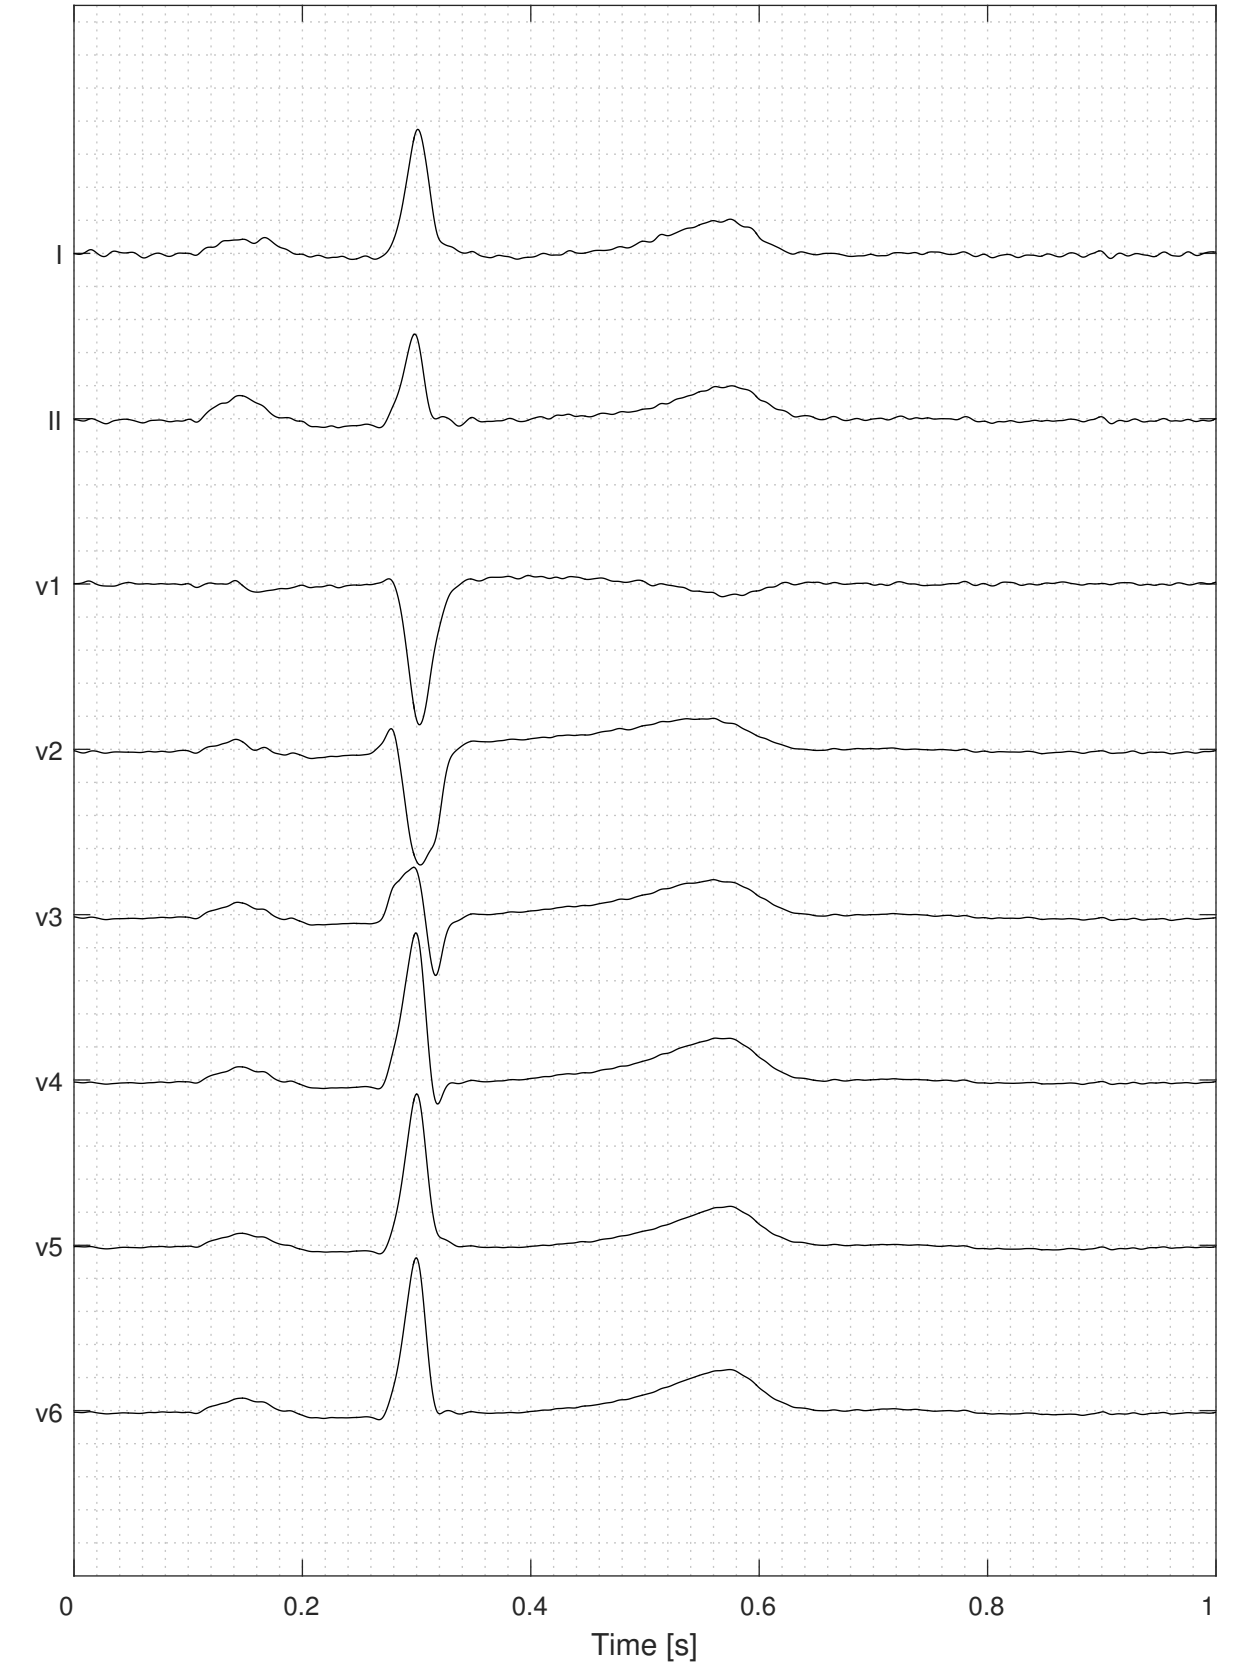

Patient 64

Low RR, Complex #: 177

Mid RR, Complex #: 78

High RR, Complex #: 104

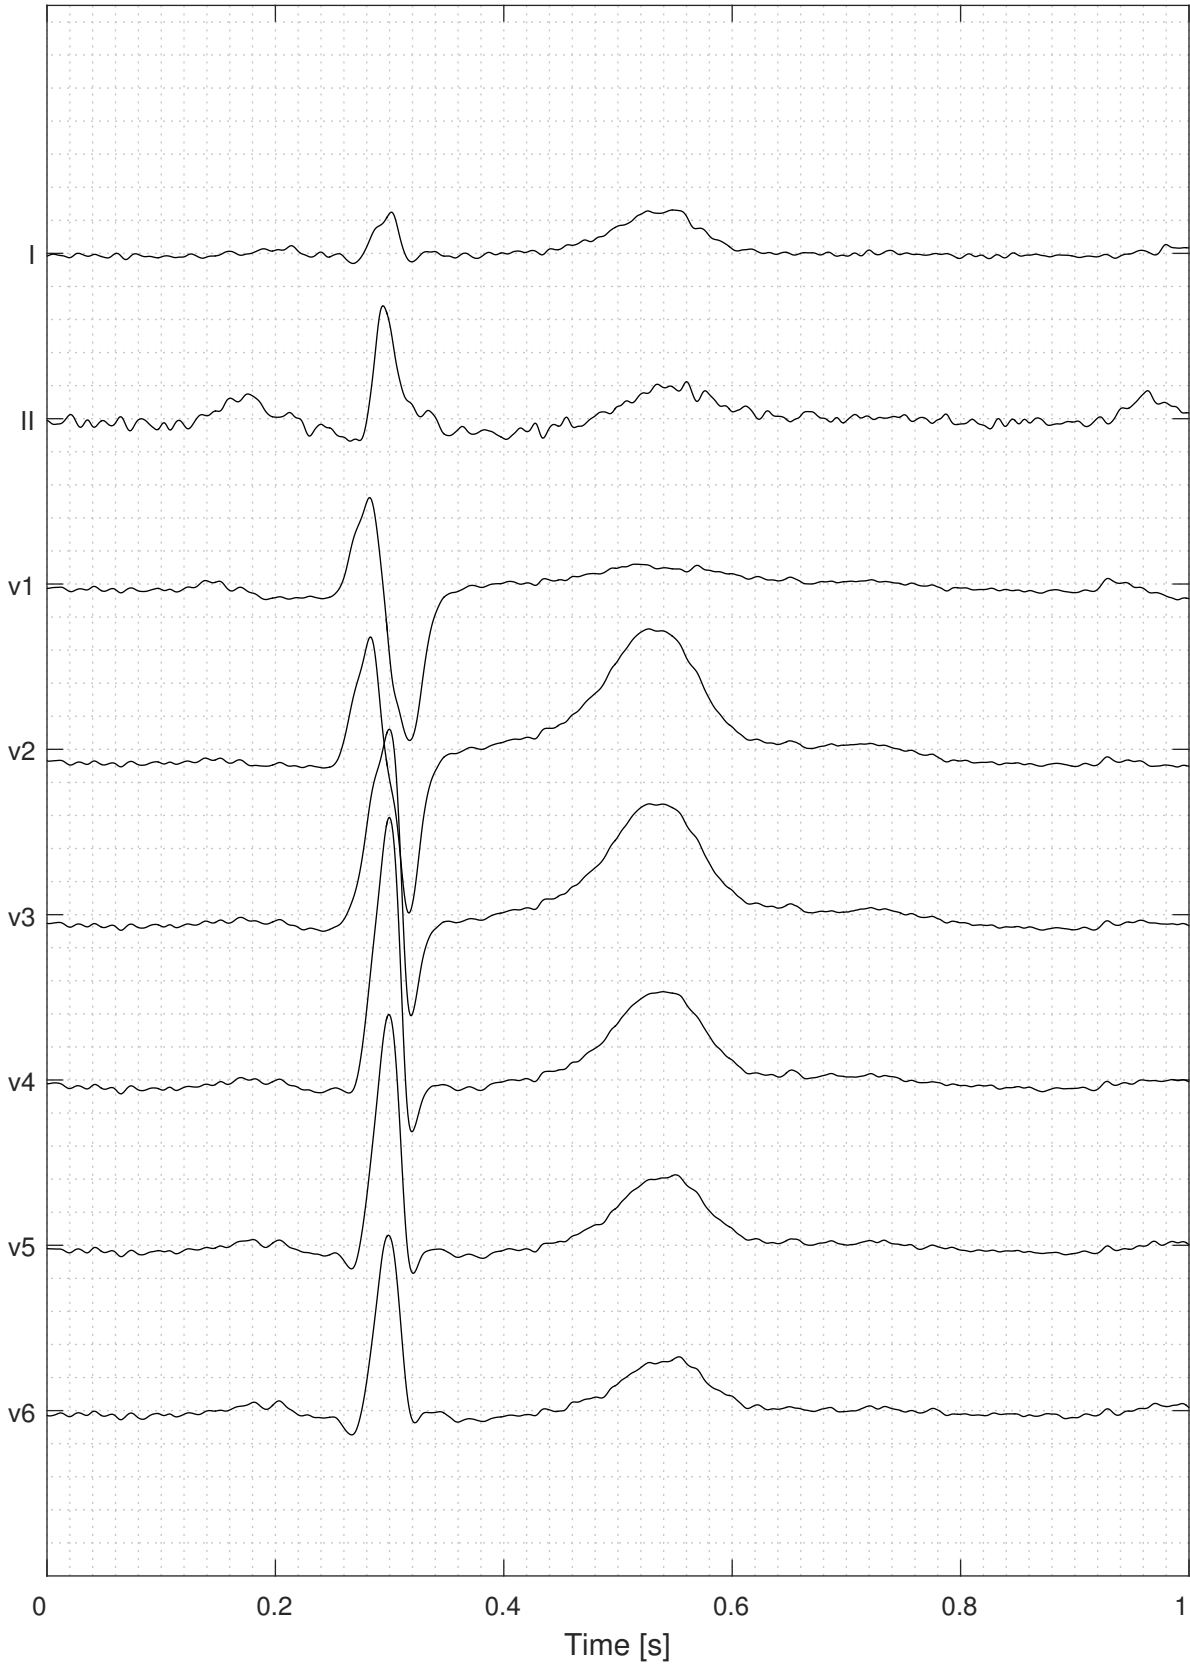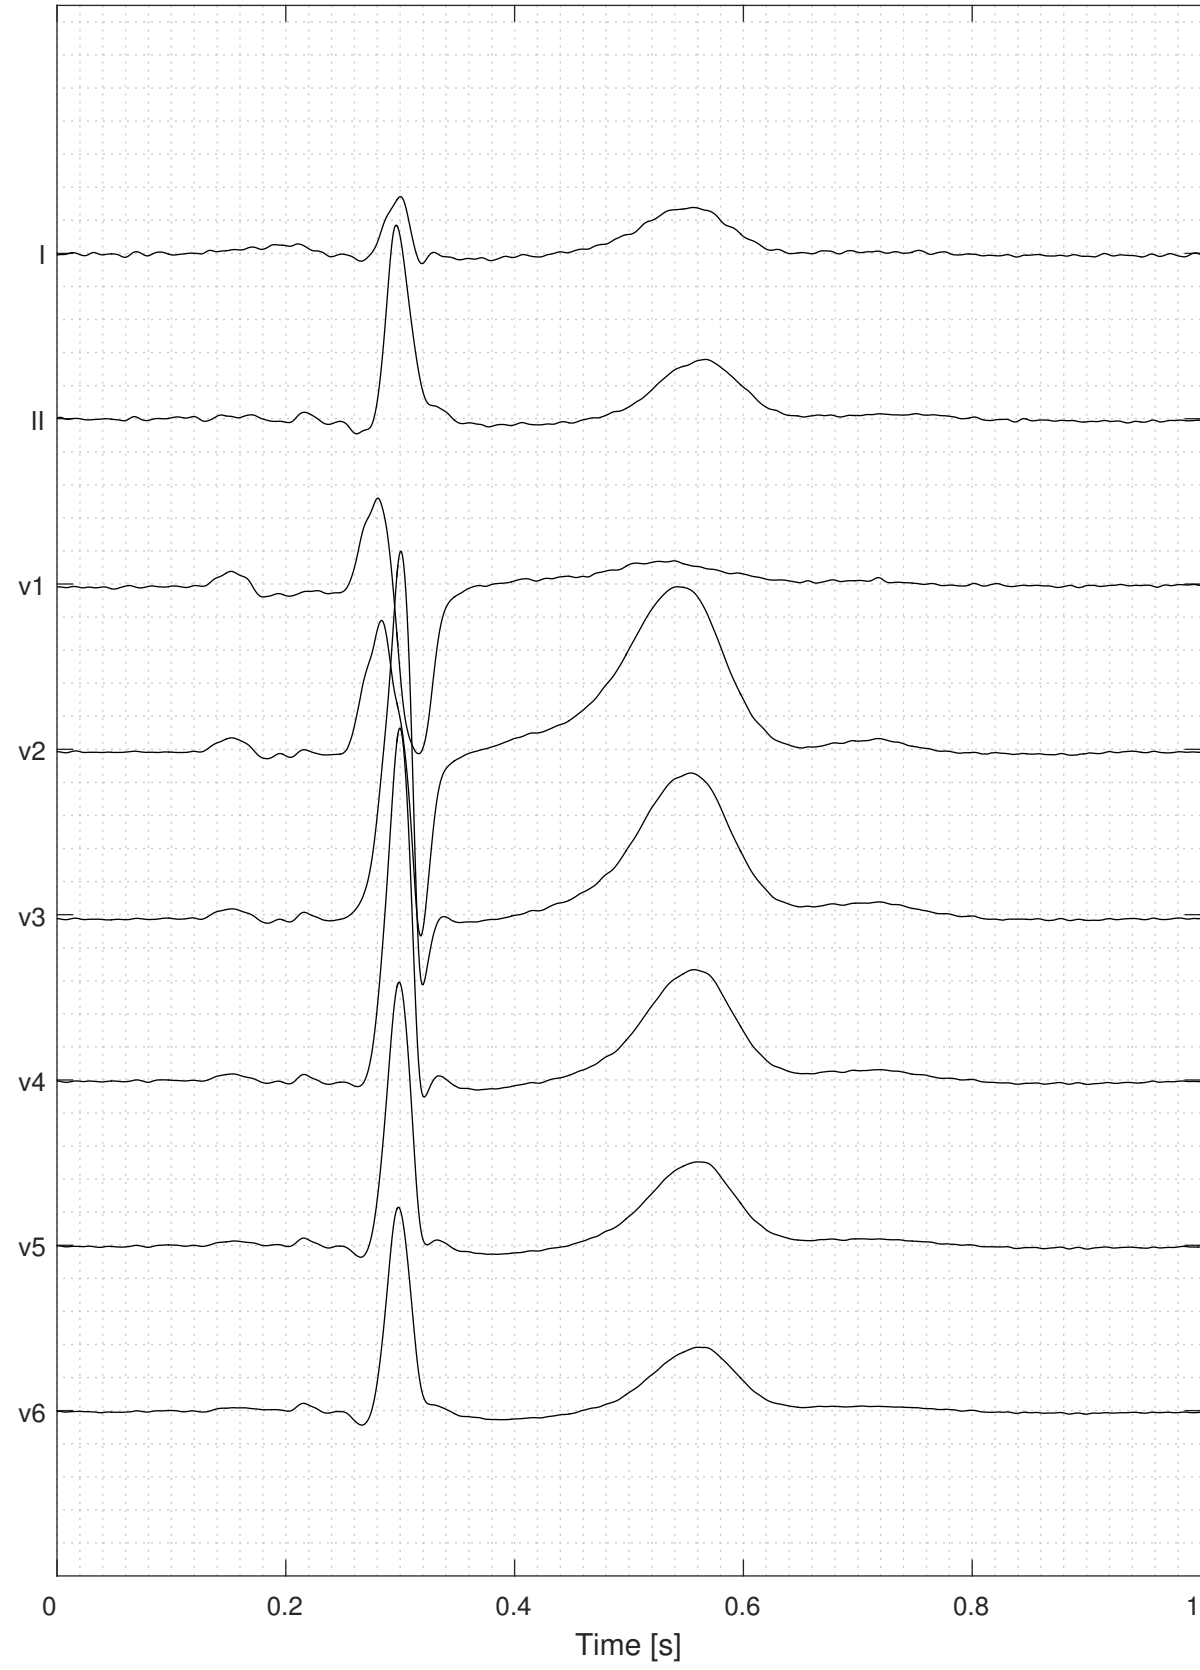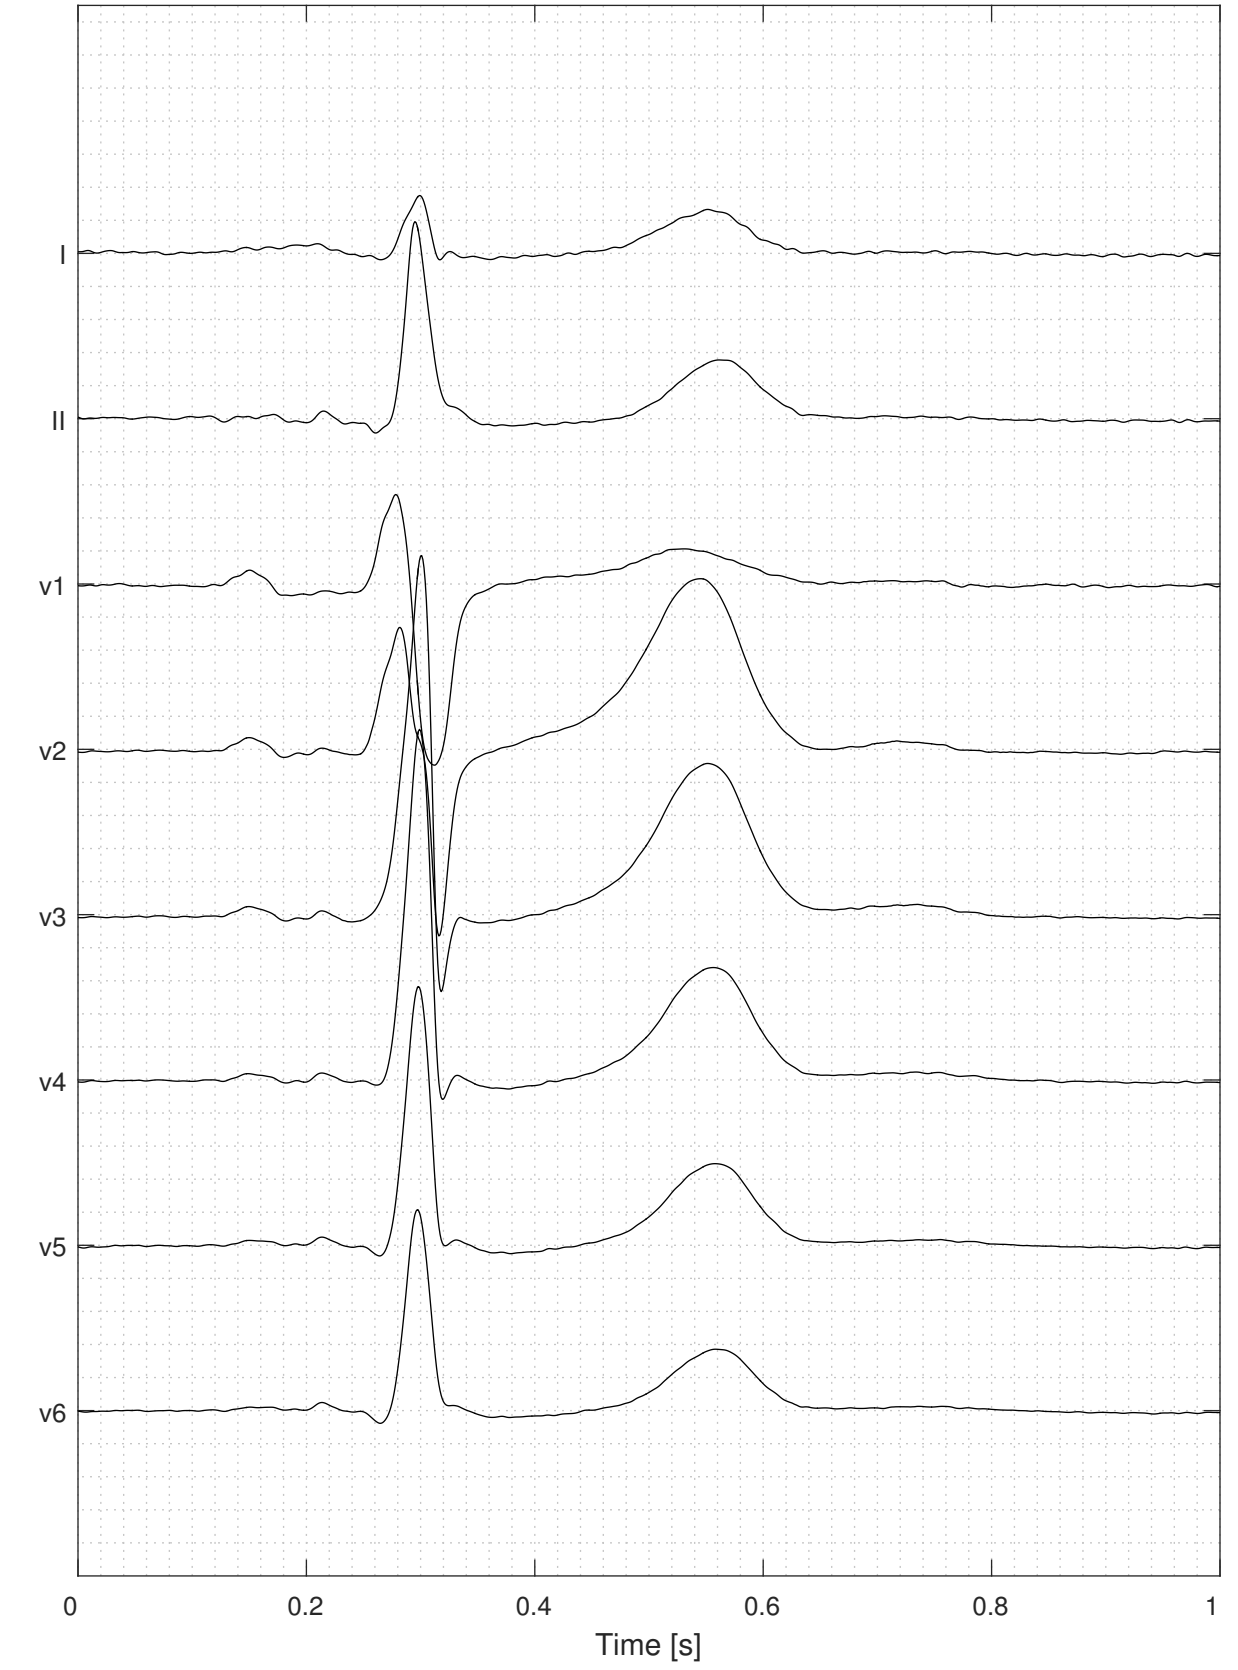



Patient 65

Low RR, Complex #: 295

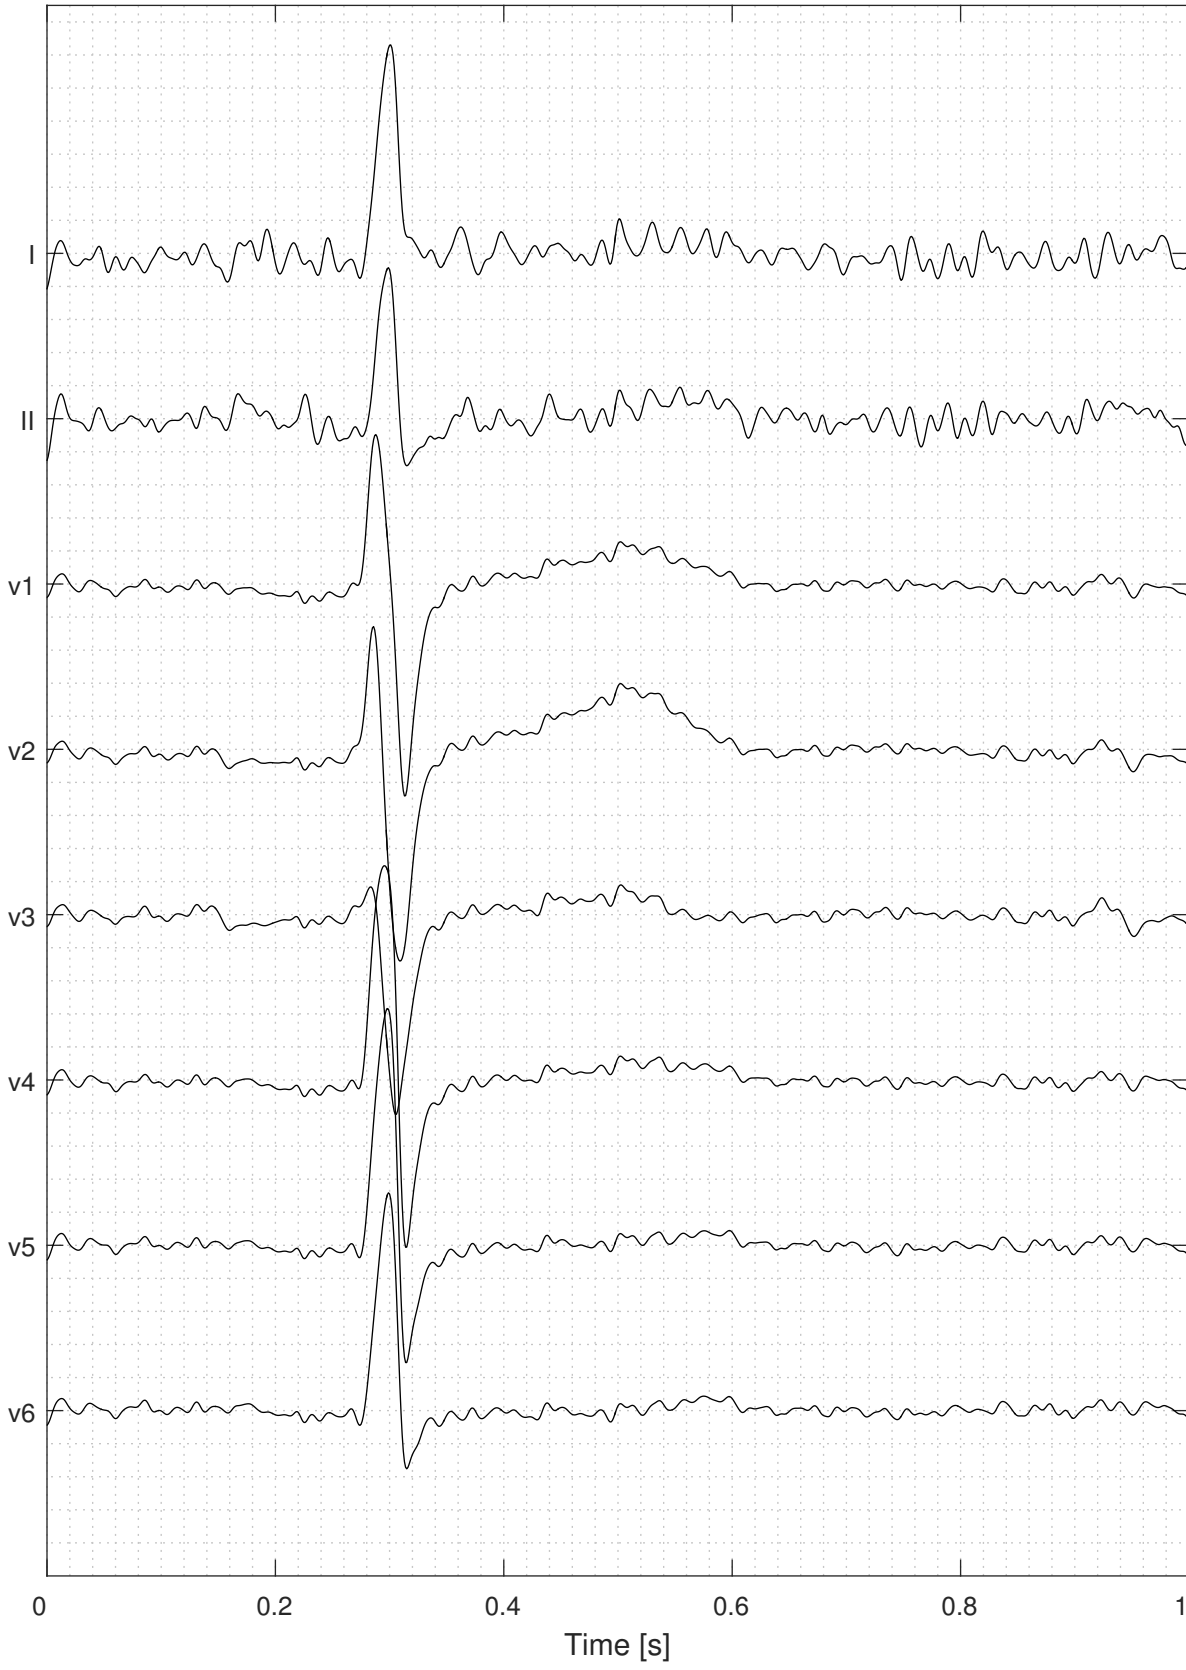

Mid RR, Complex #: 35

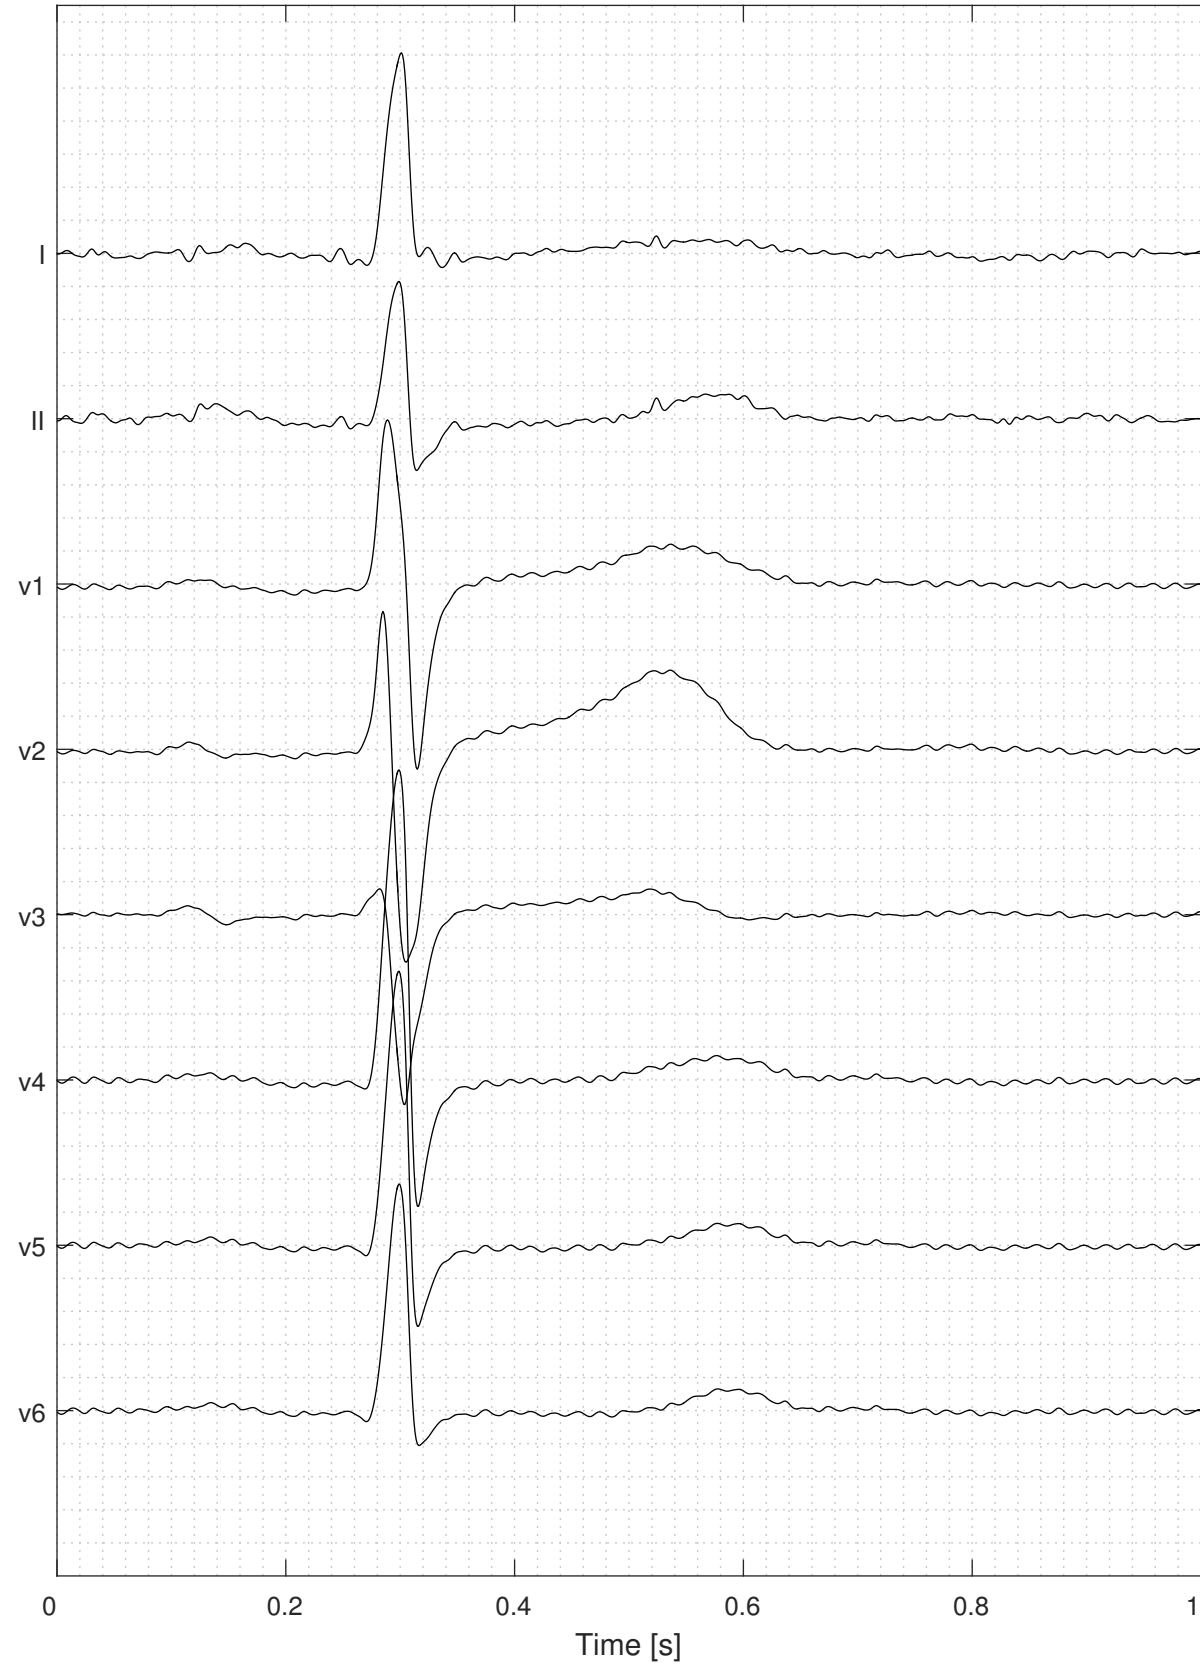

High RR, Complex #: 86

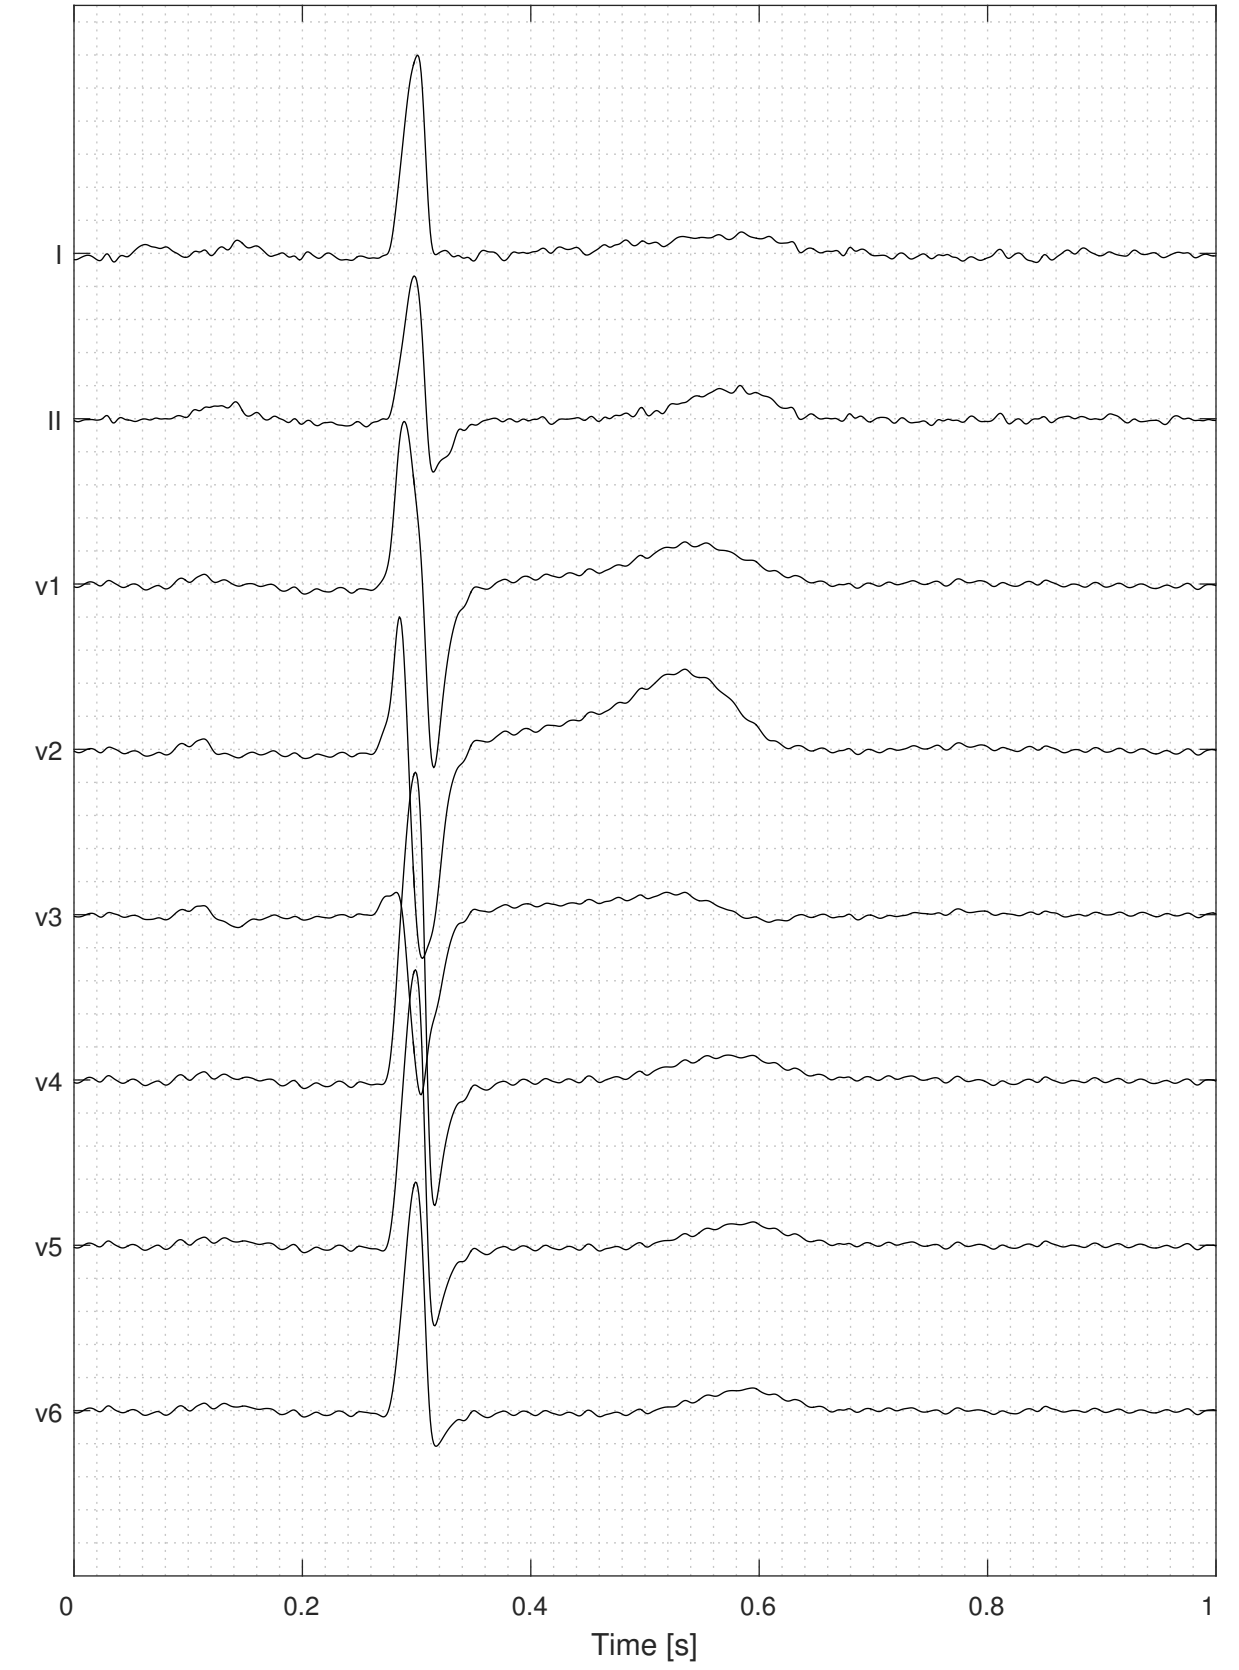

Patient 66

Low RR, Complex #: 136

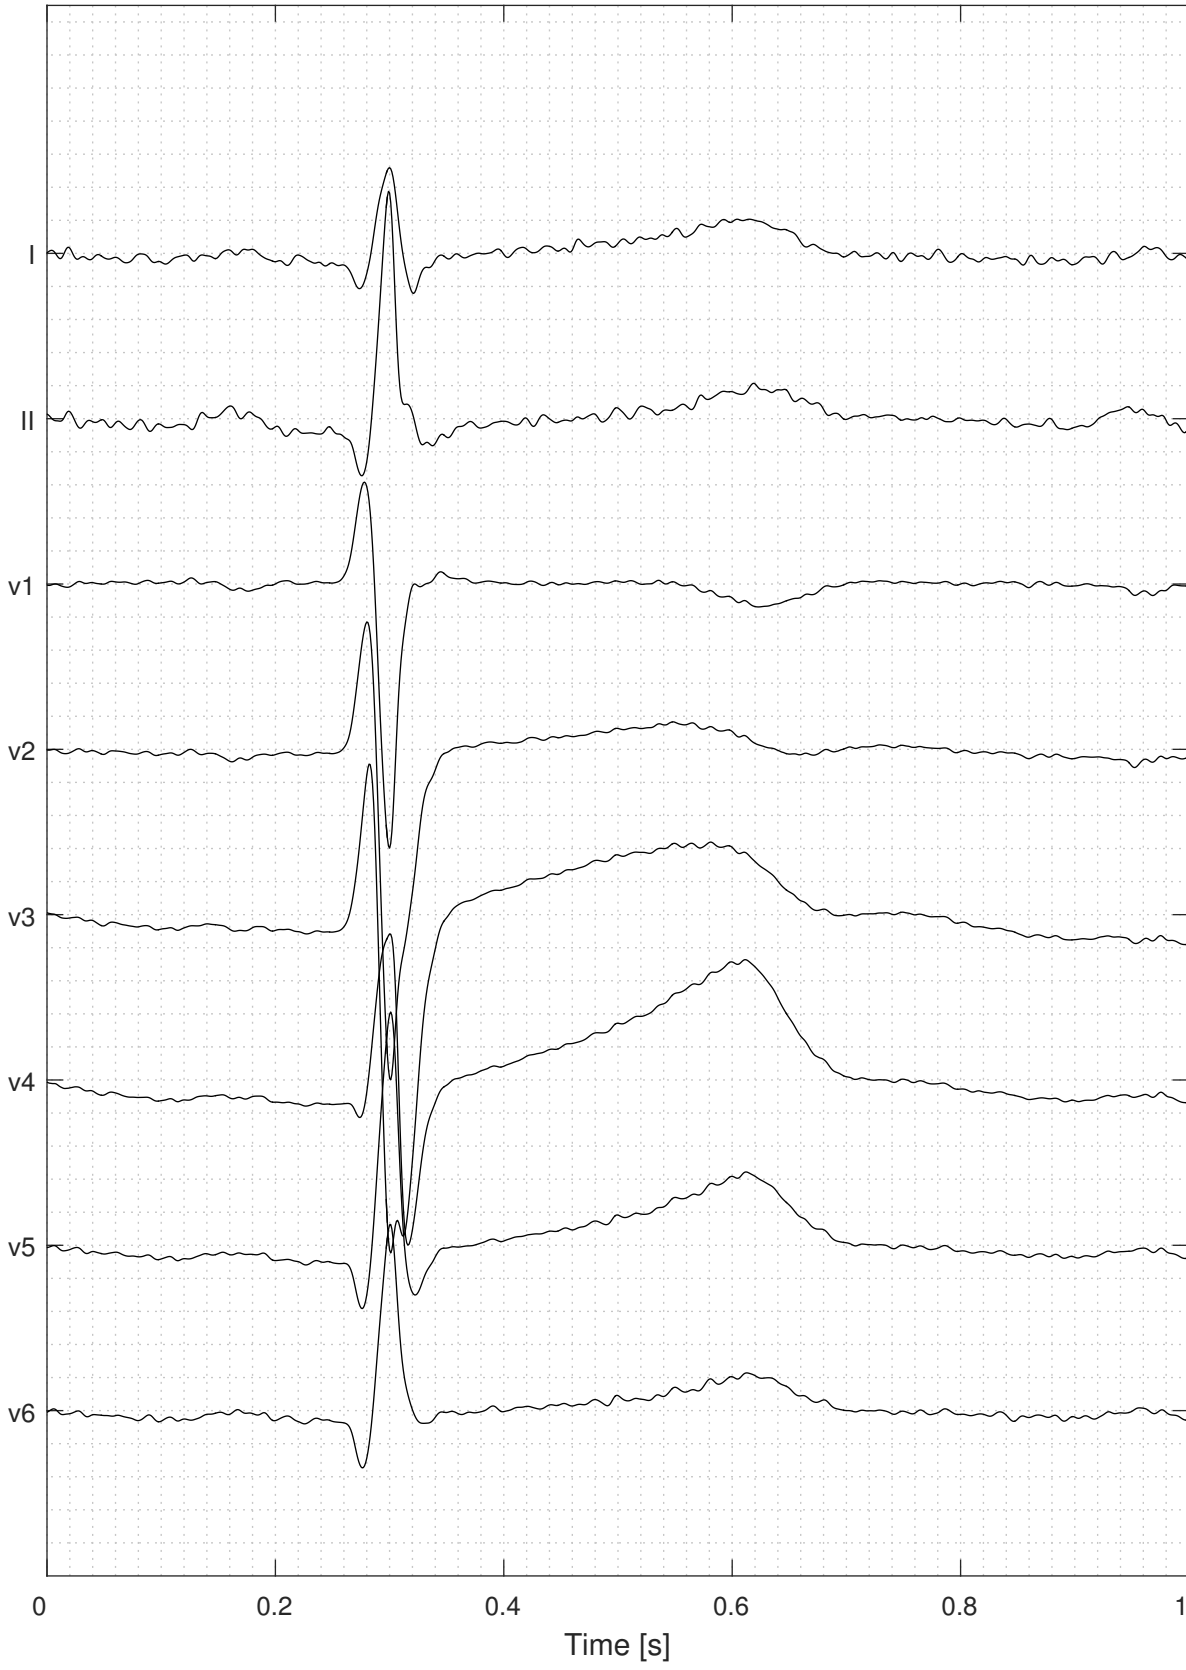

Mid RR, Complex #: 144

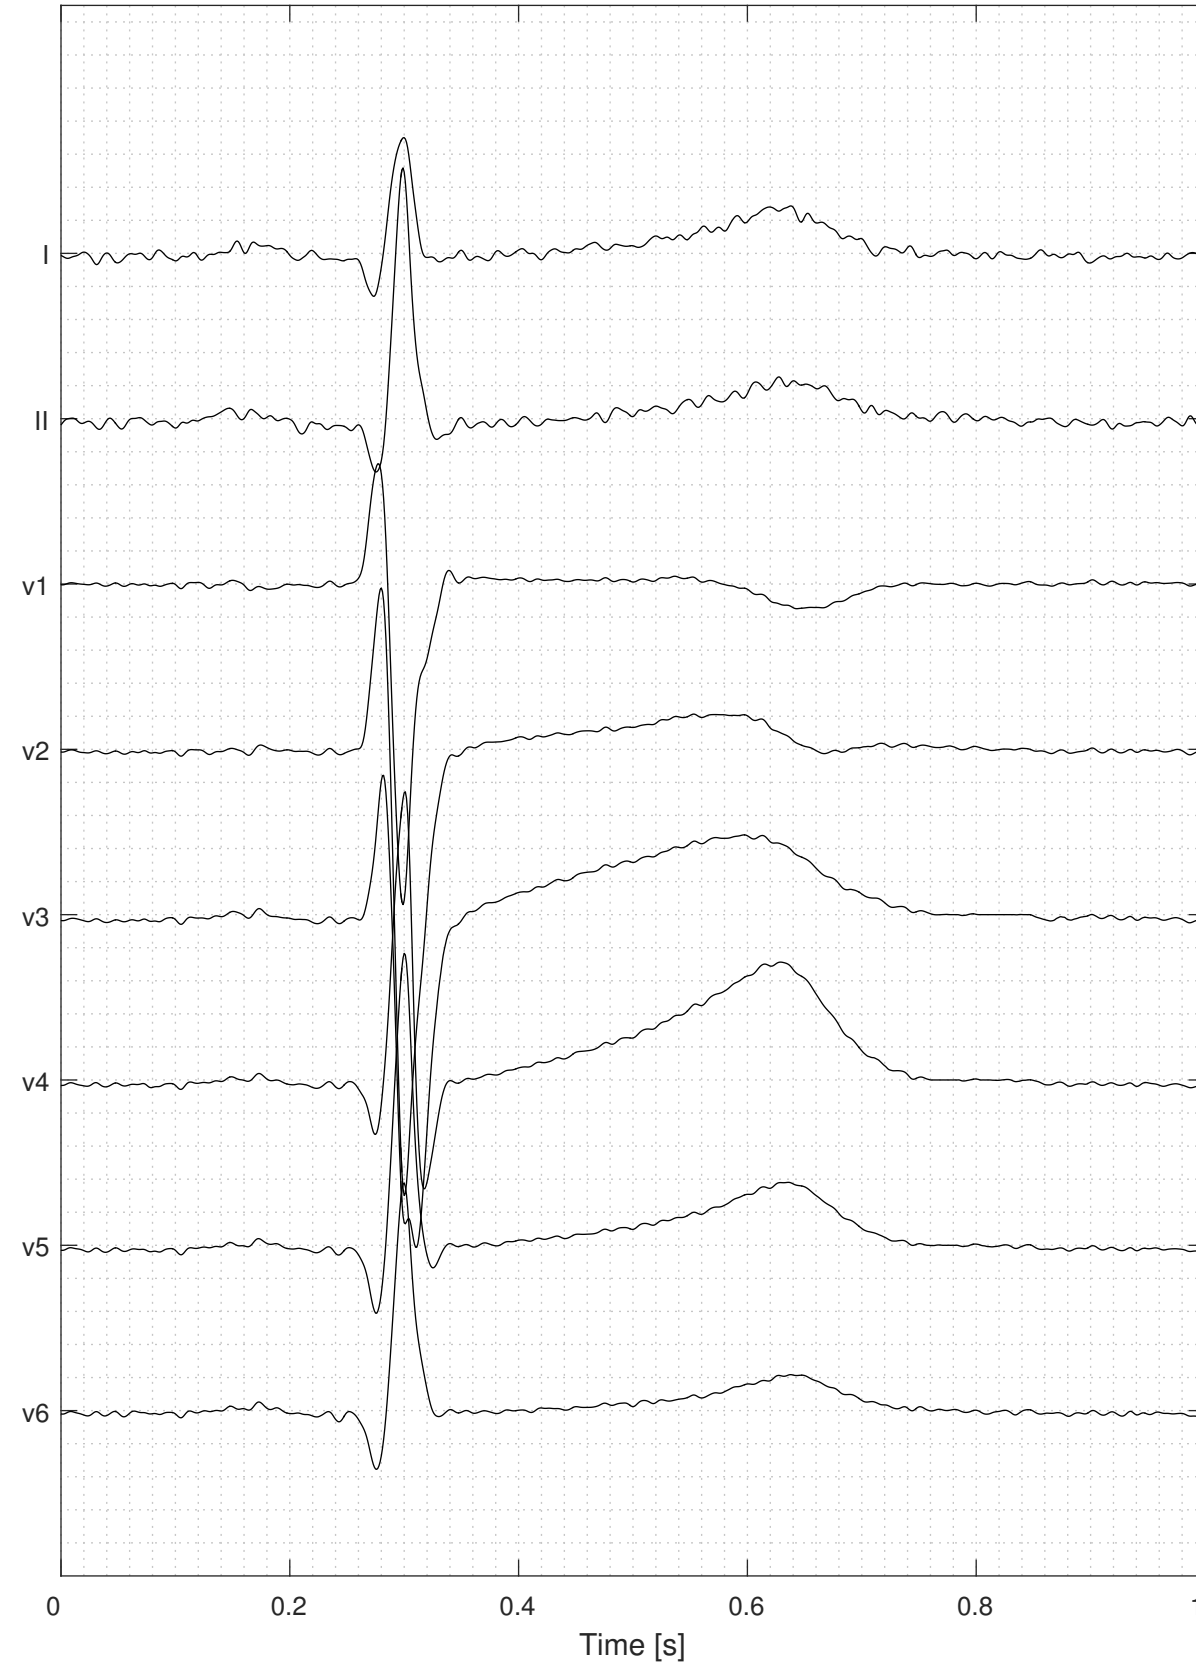

High RR, Complex #: 39

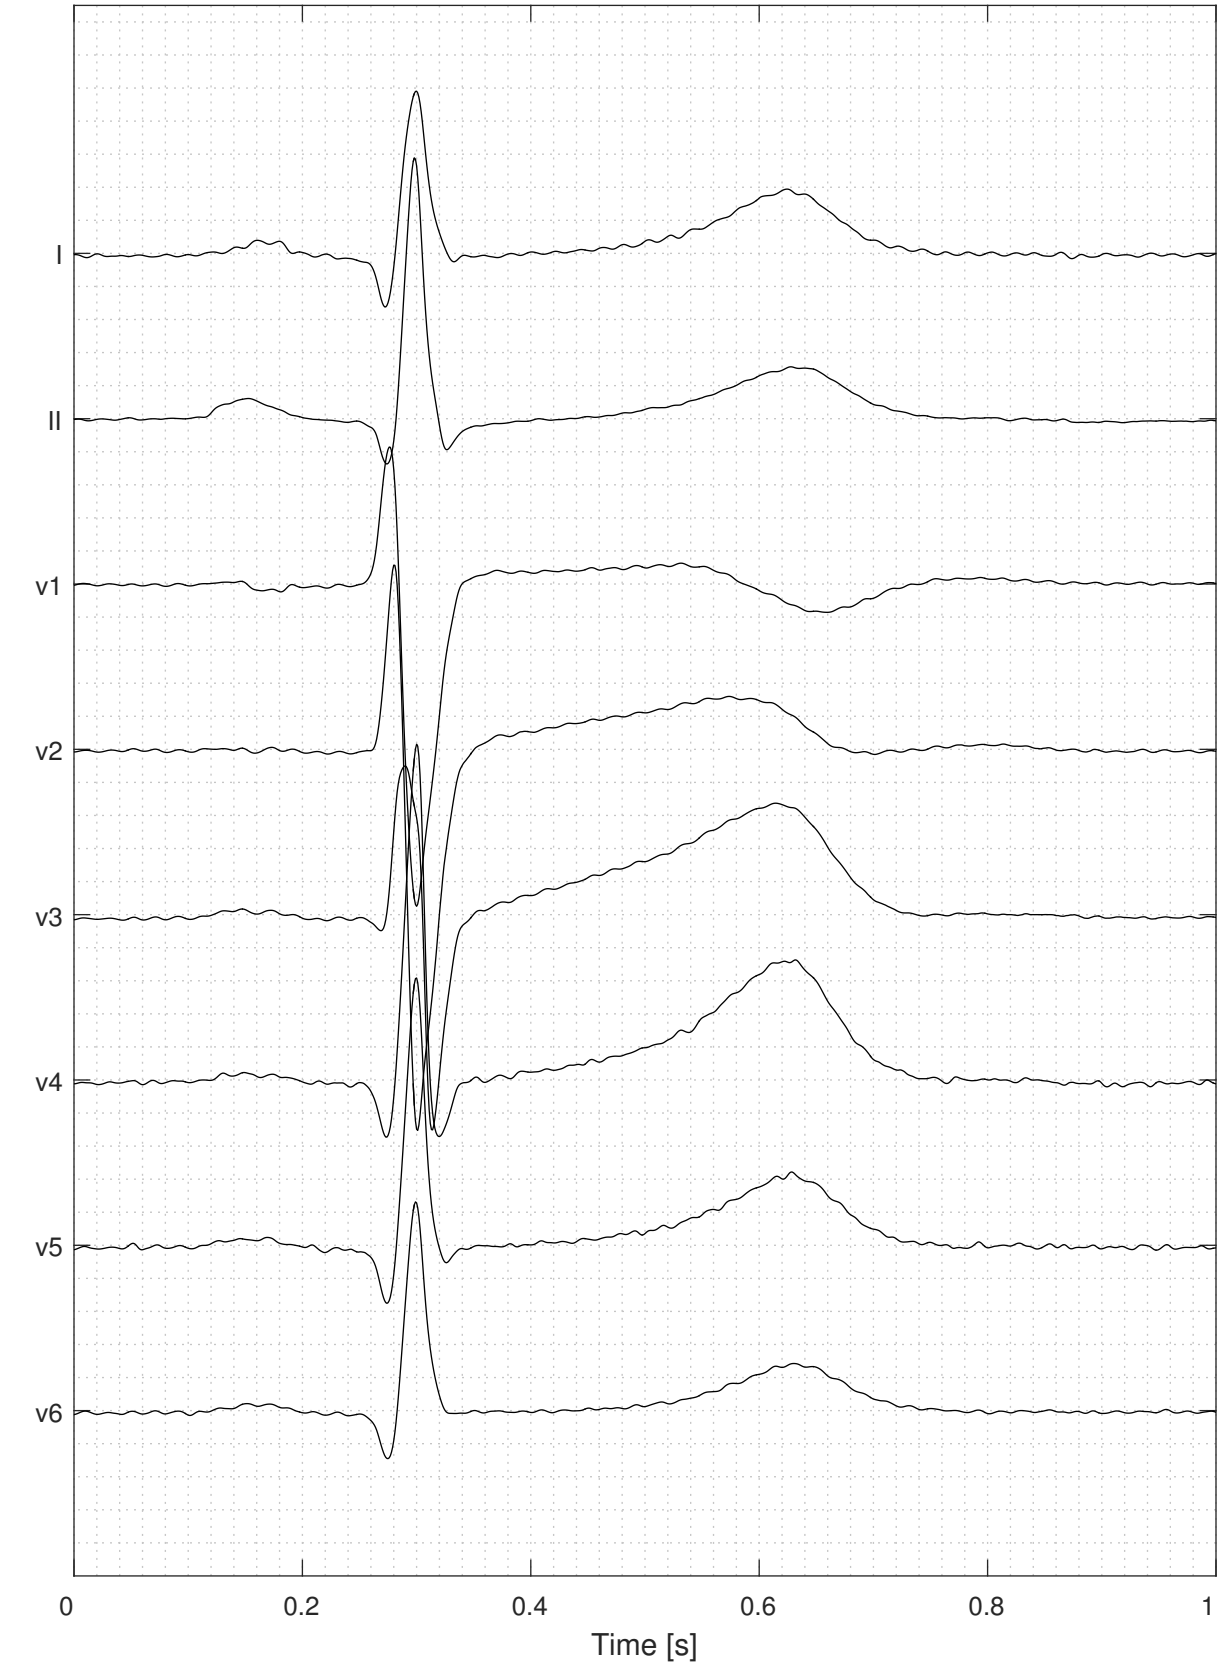

Patient 67

Low RR, Complex #: 230

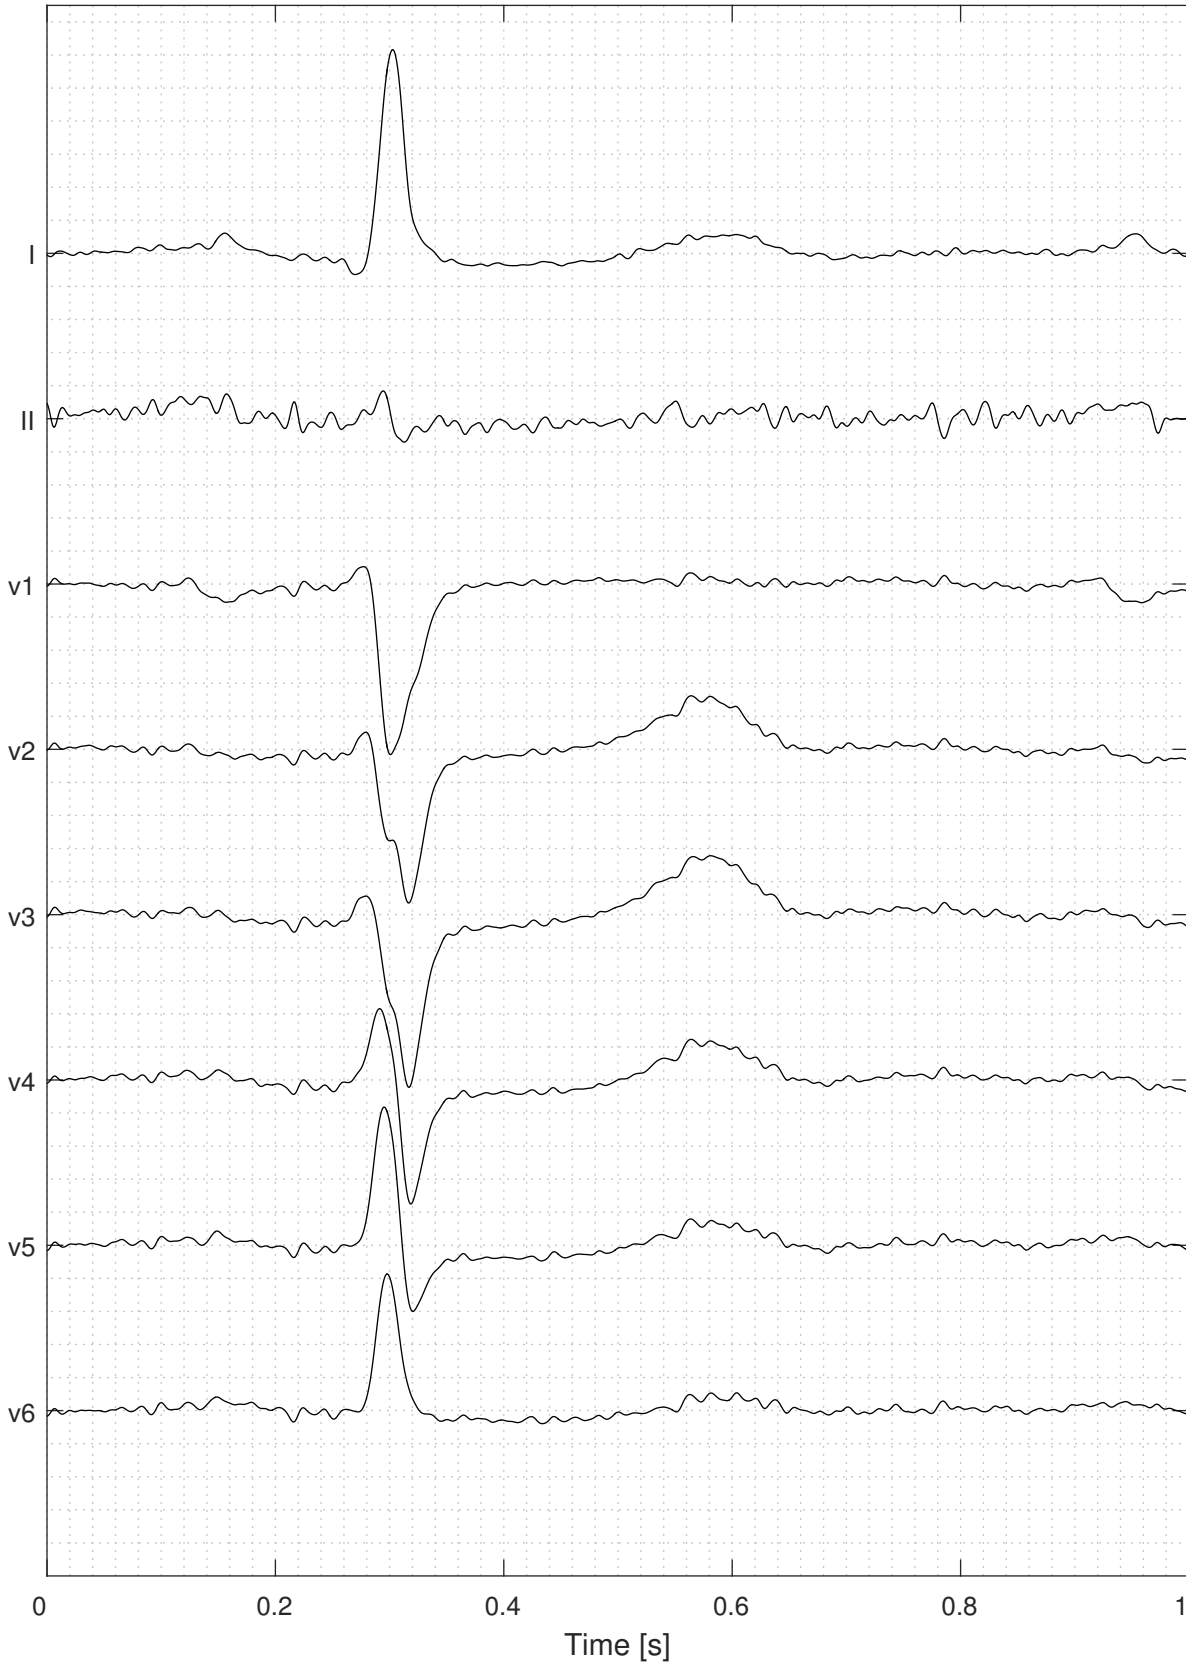

Mid RR, Complex #: 25

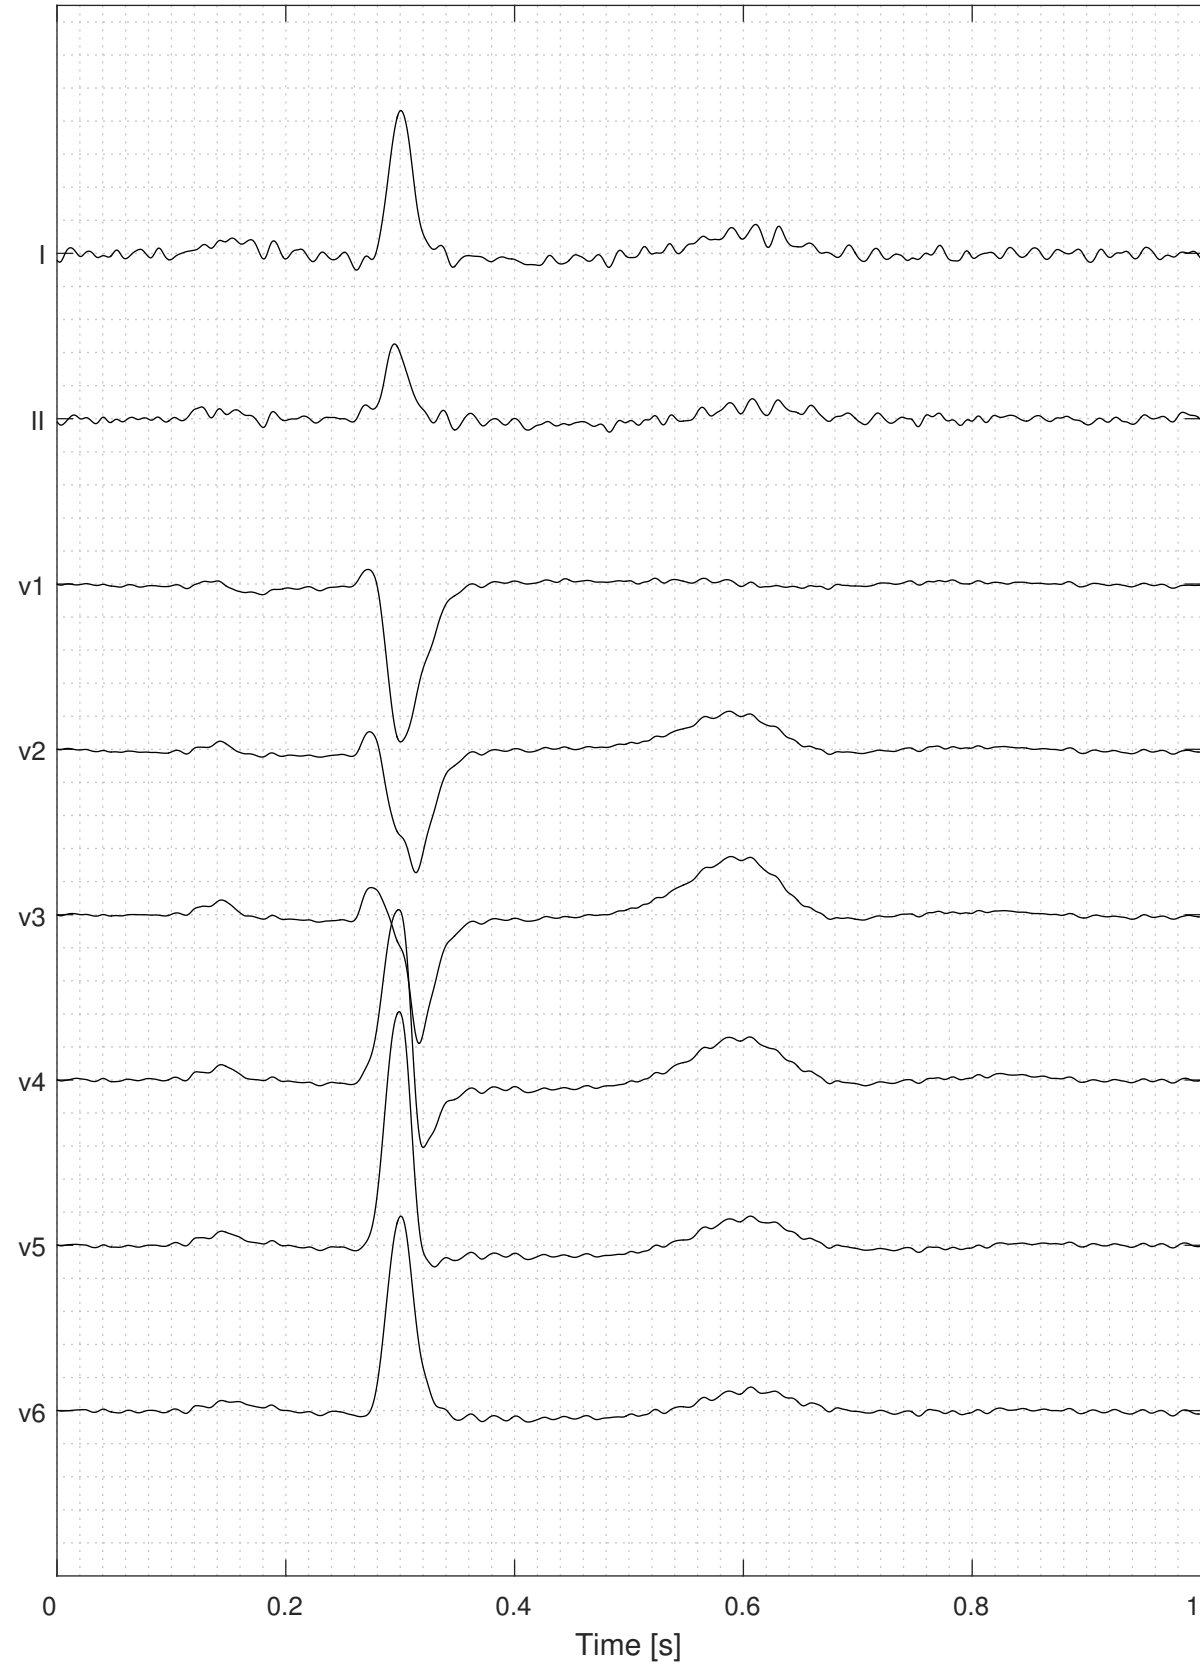

High RR, Complex #: 161

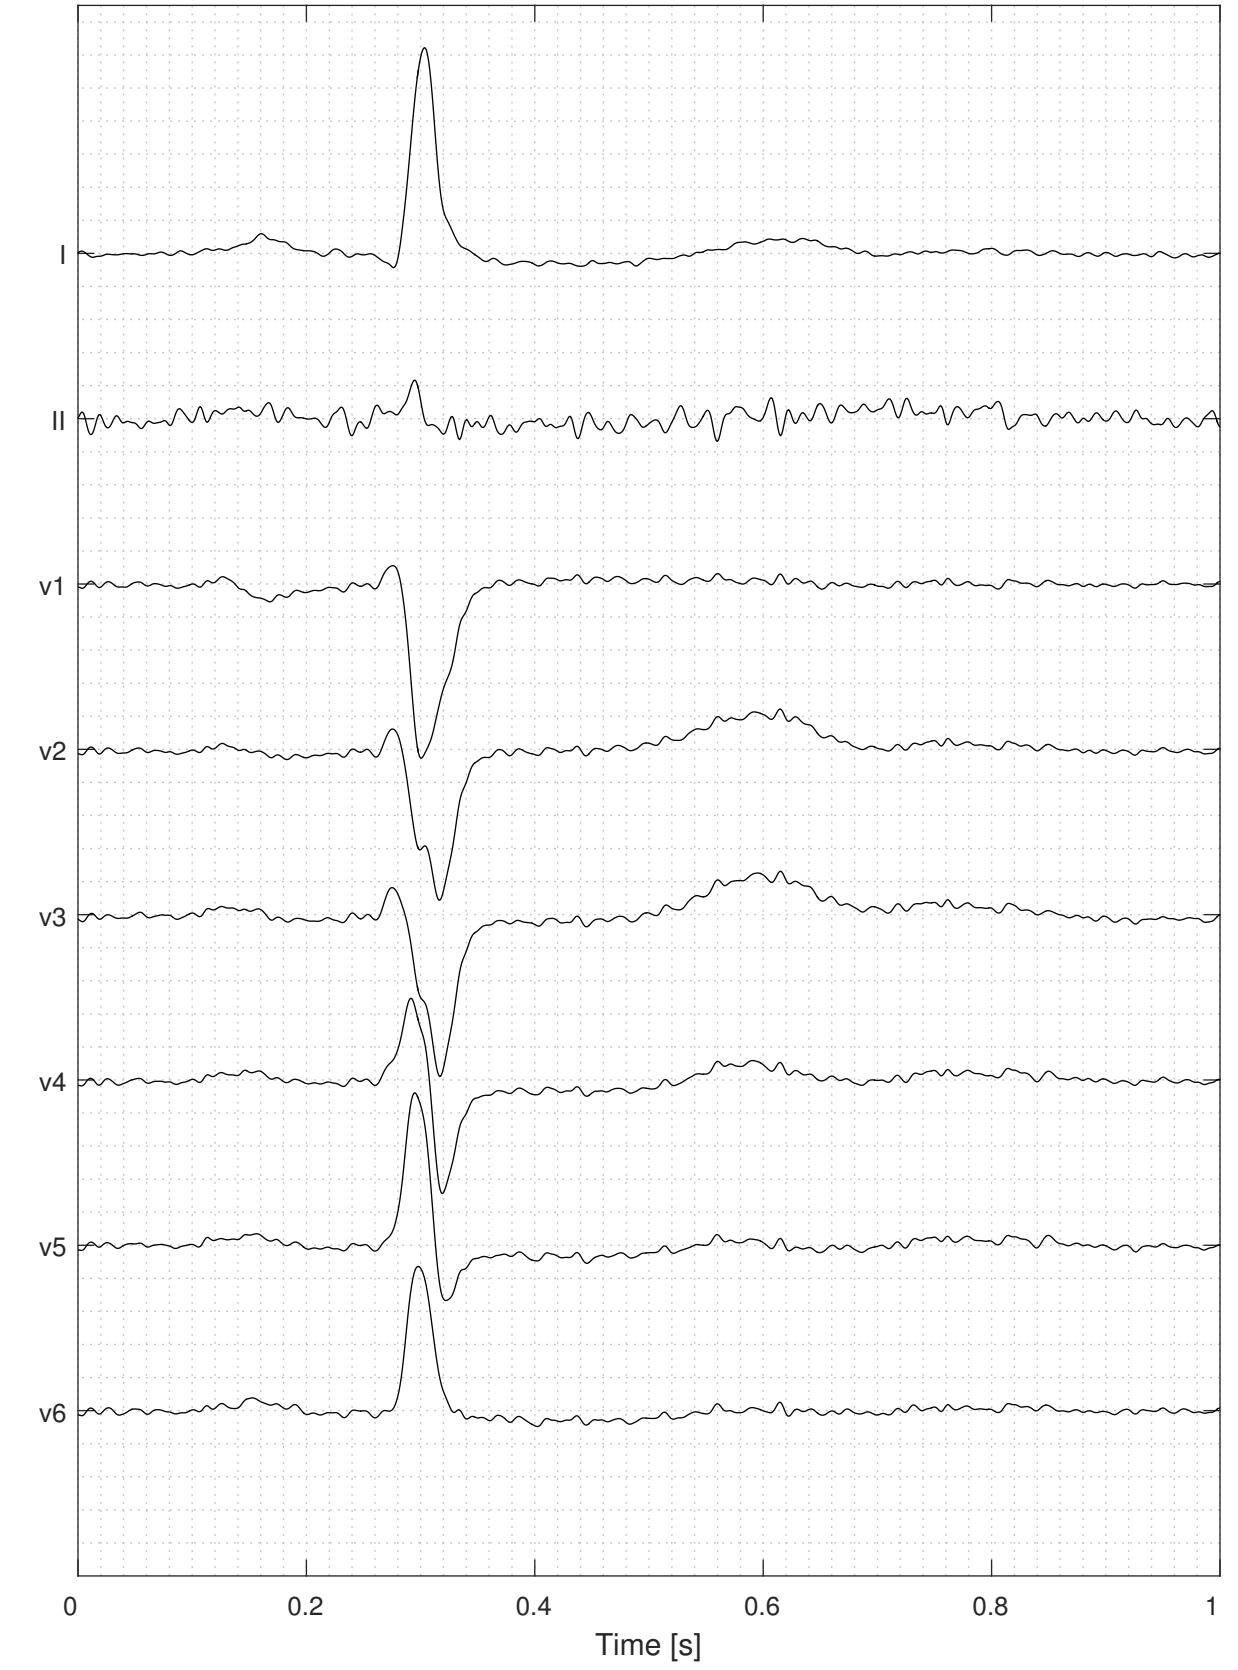

Patient 68

Low RR, Complex #: 253

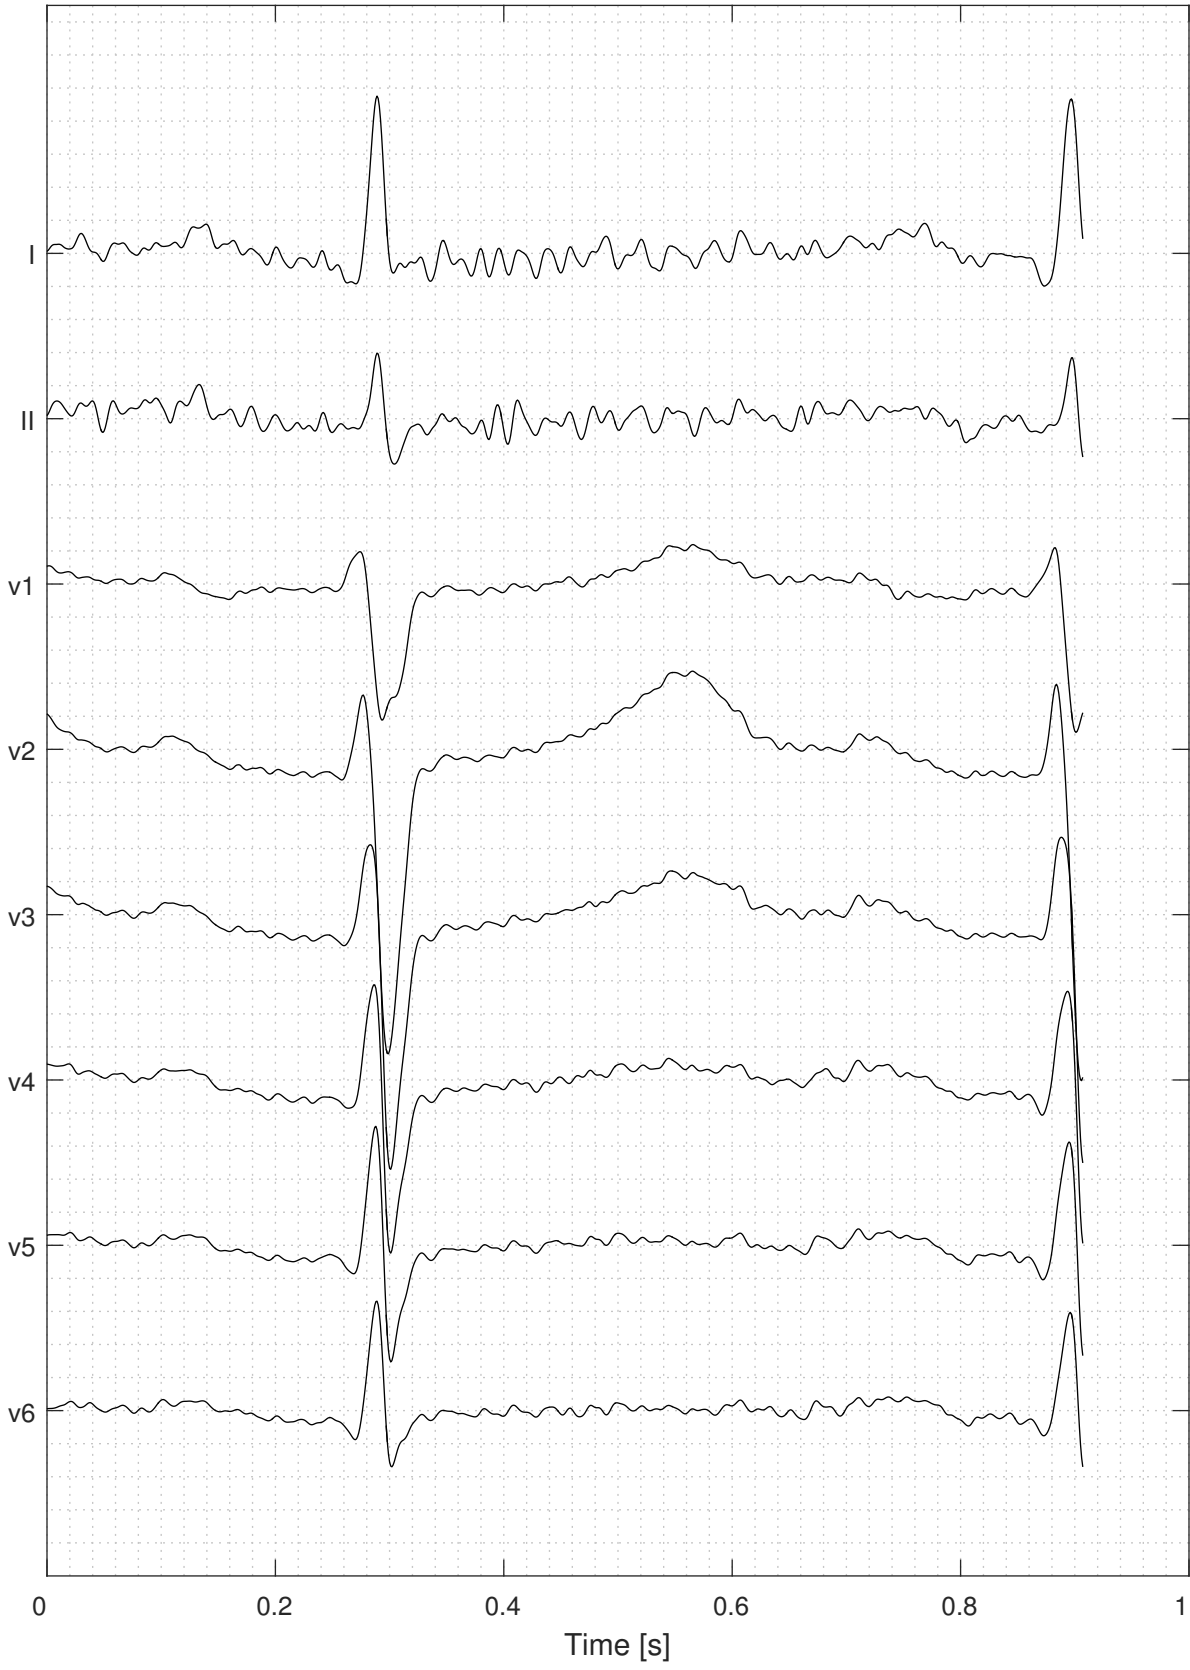

Mid RR, Complex #: 43

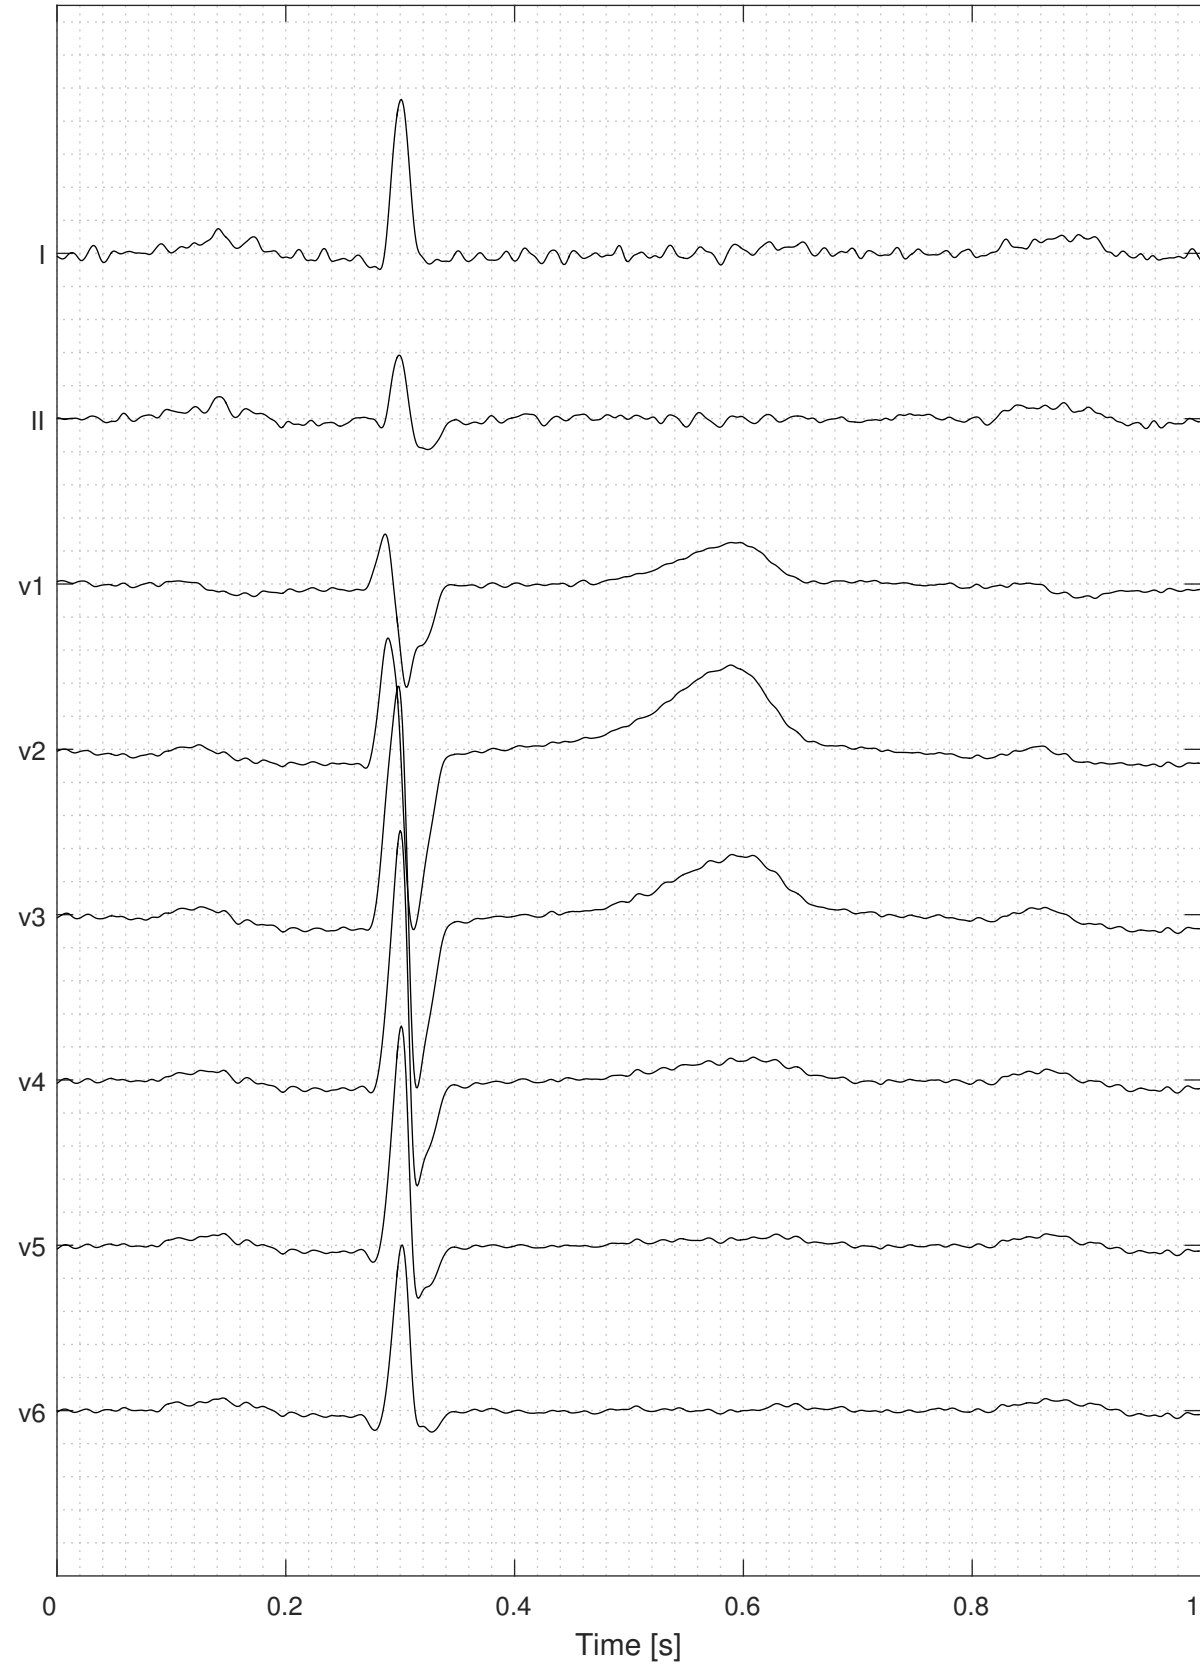

High RR, Complex #: 187

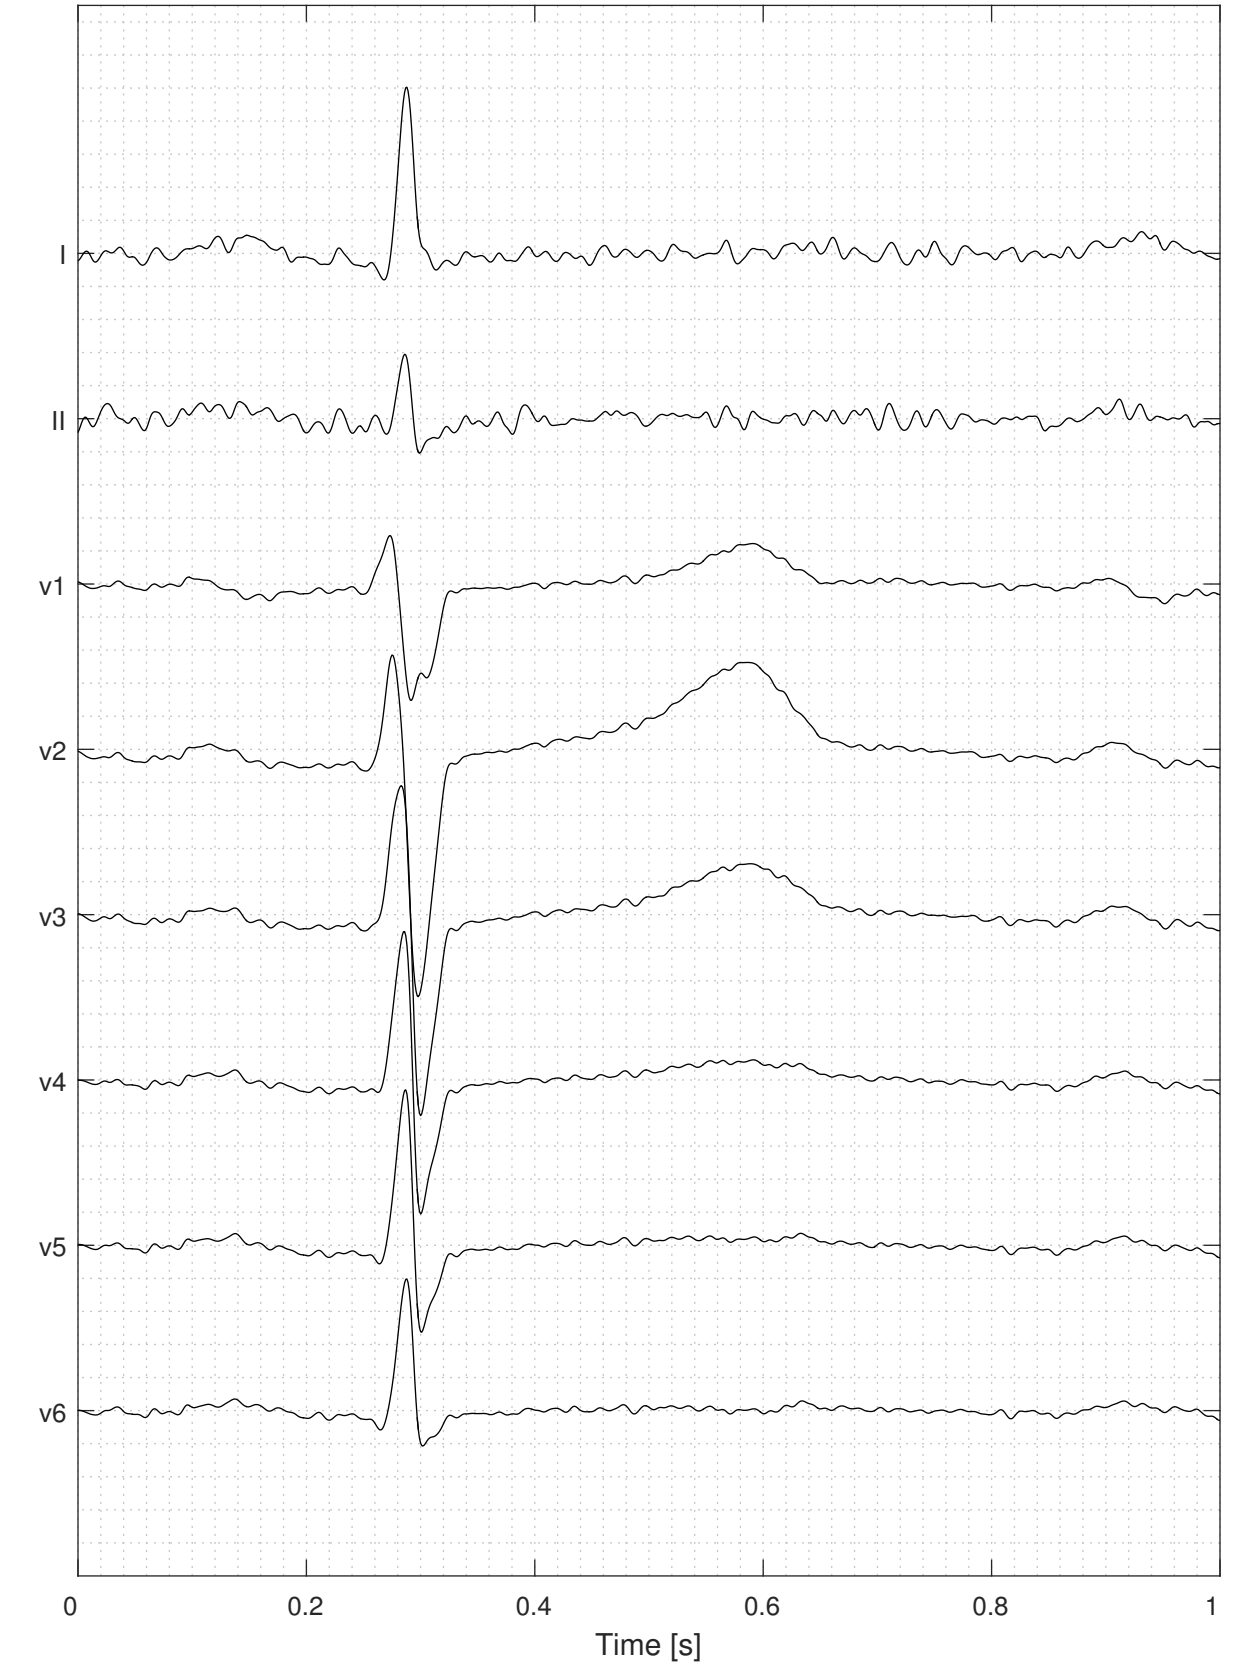

Patient 69

Low RR, Complex #: 161

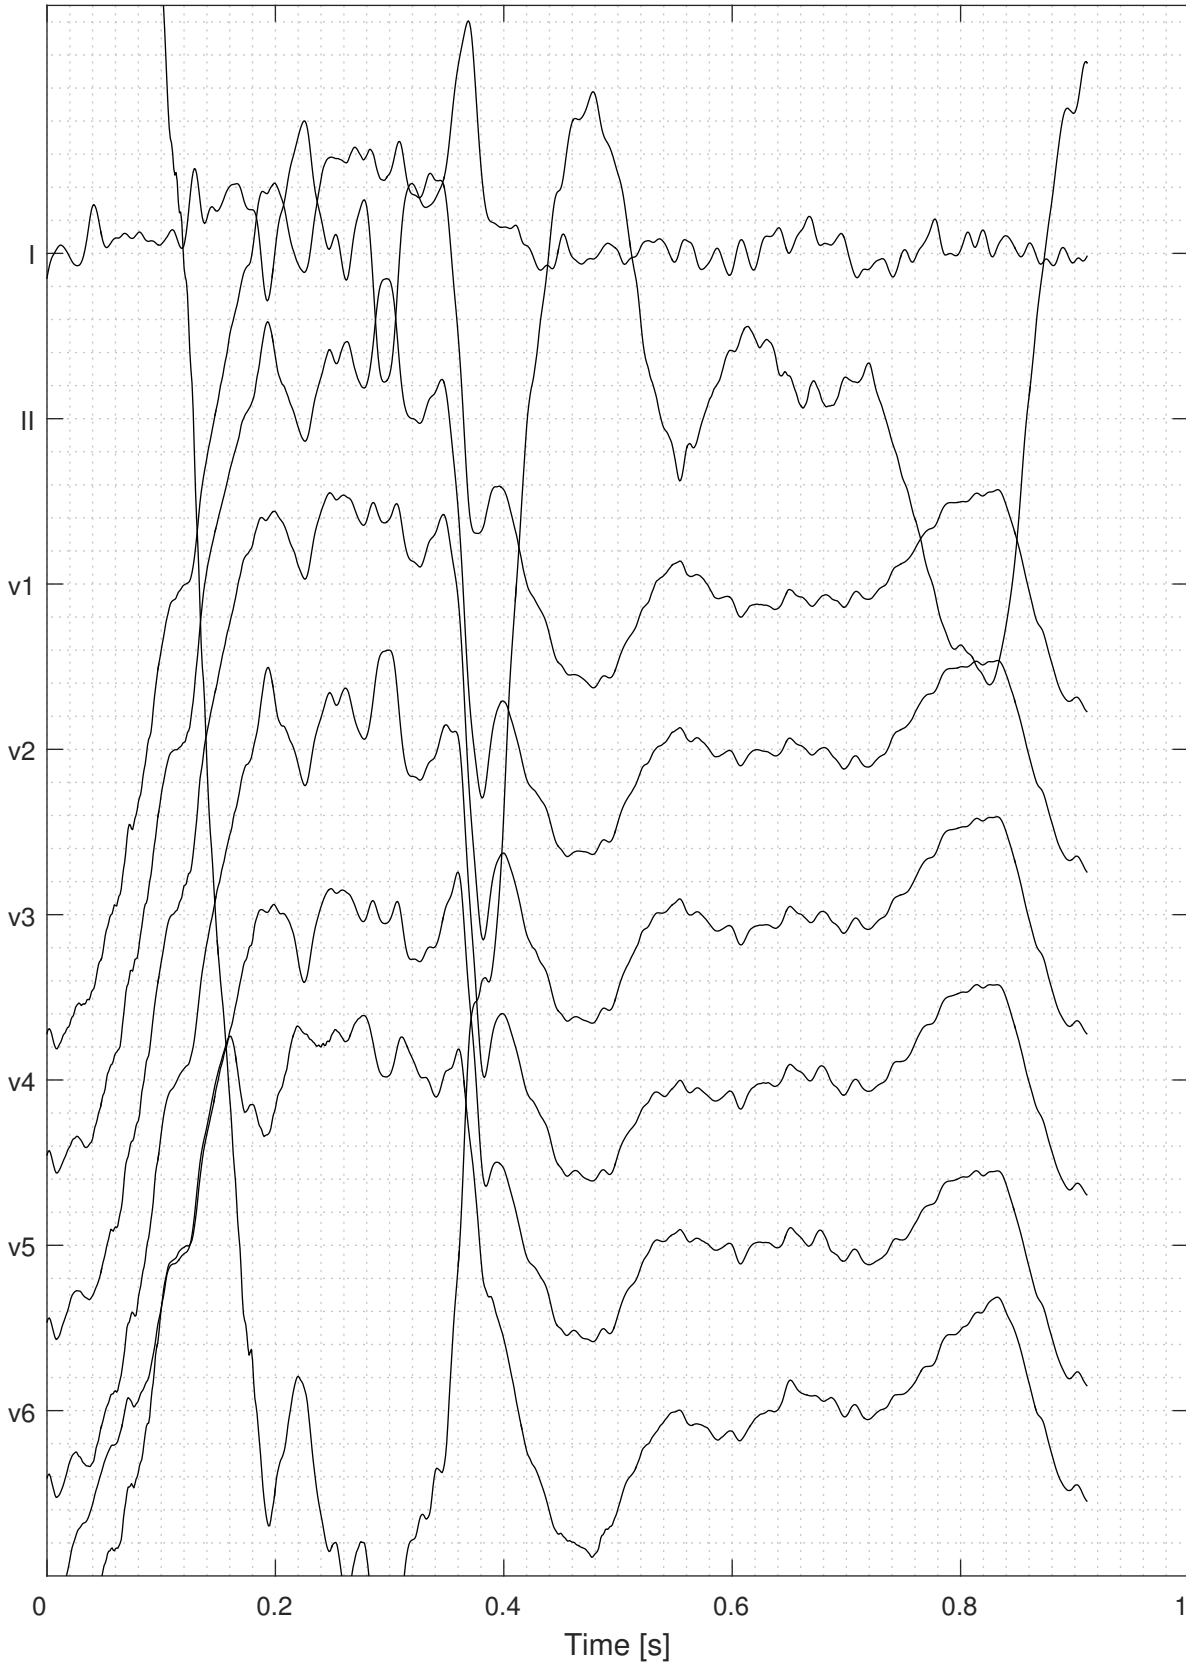

Mid RR, Complex #: 189

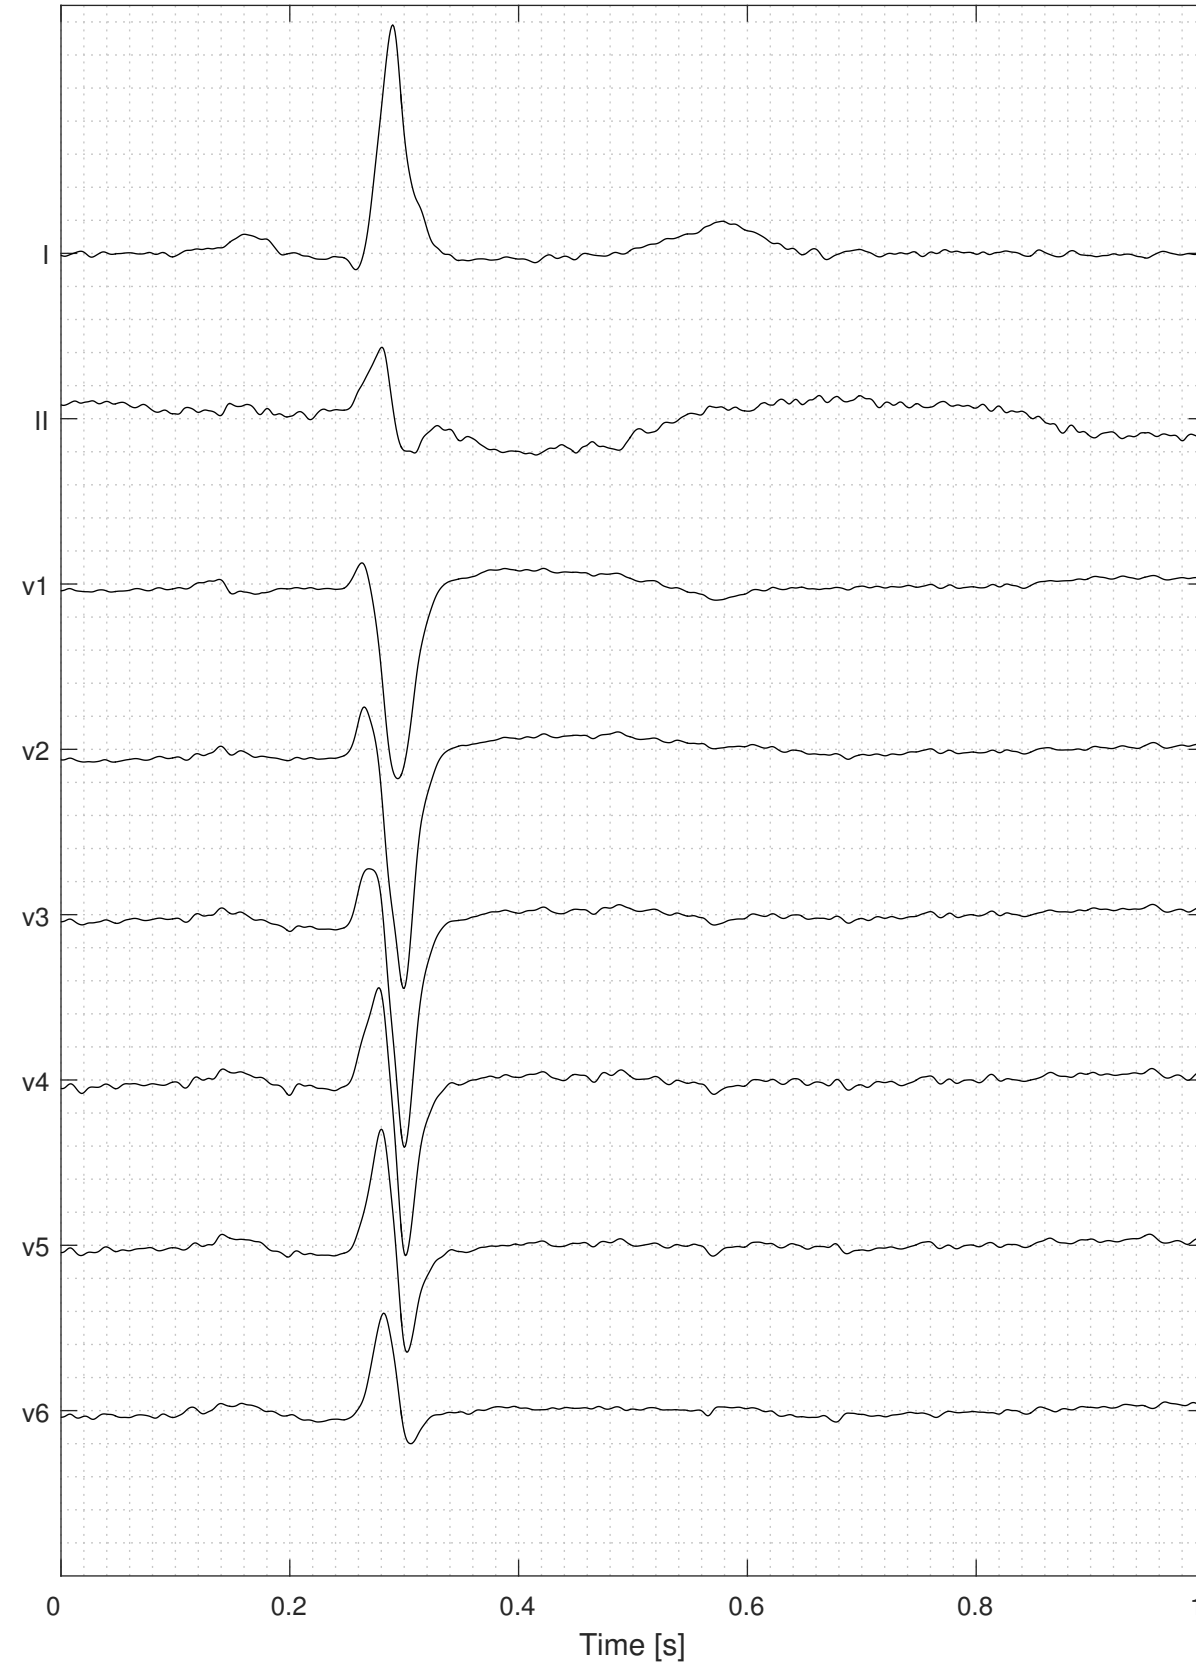

High RR, Complex #: 150

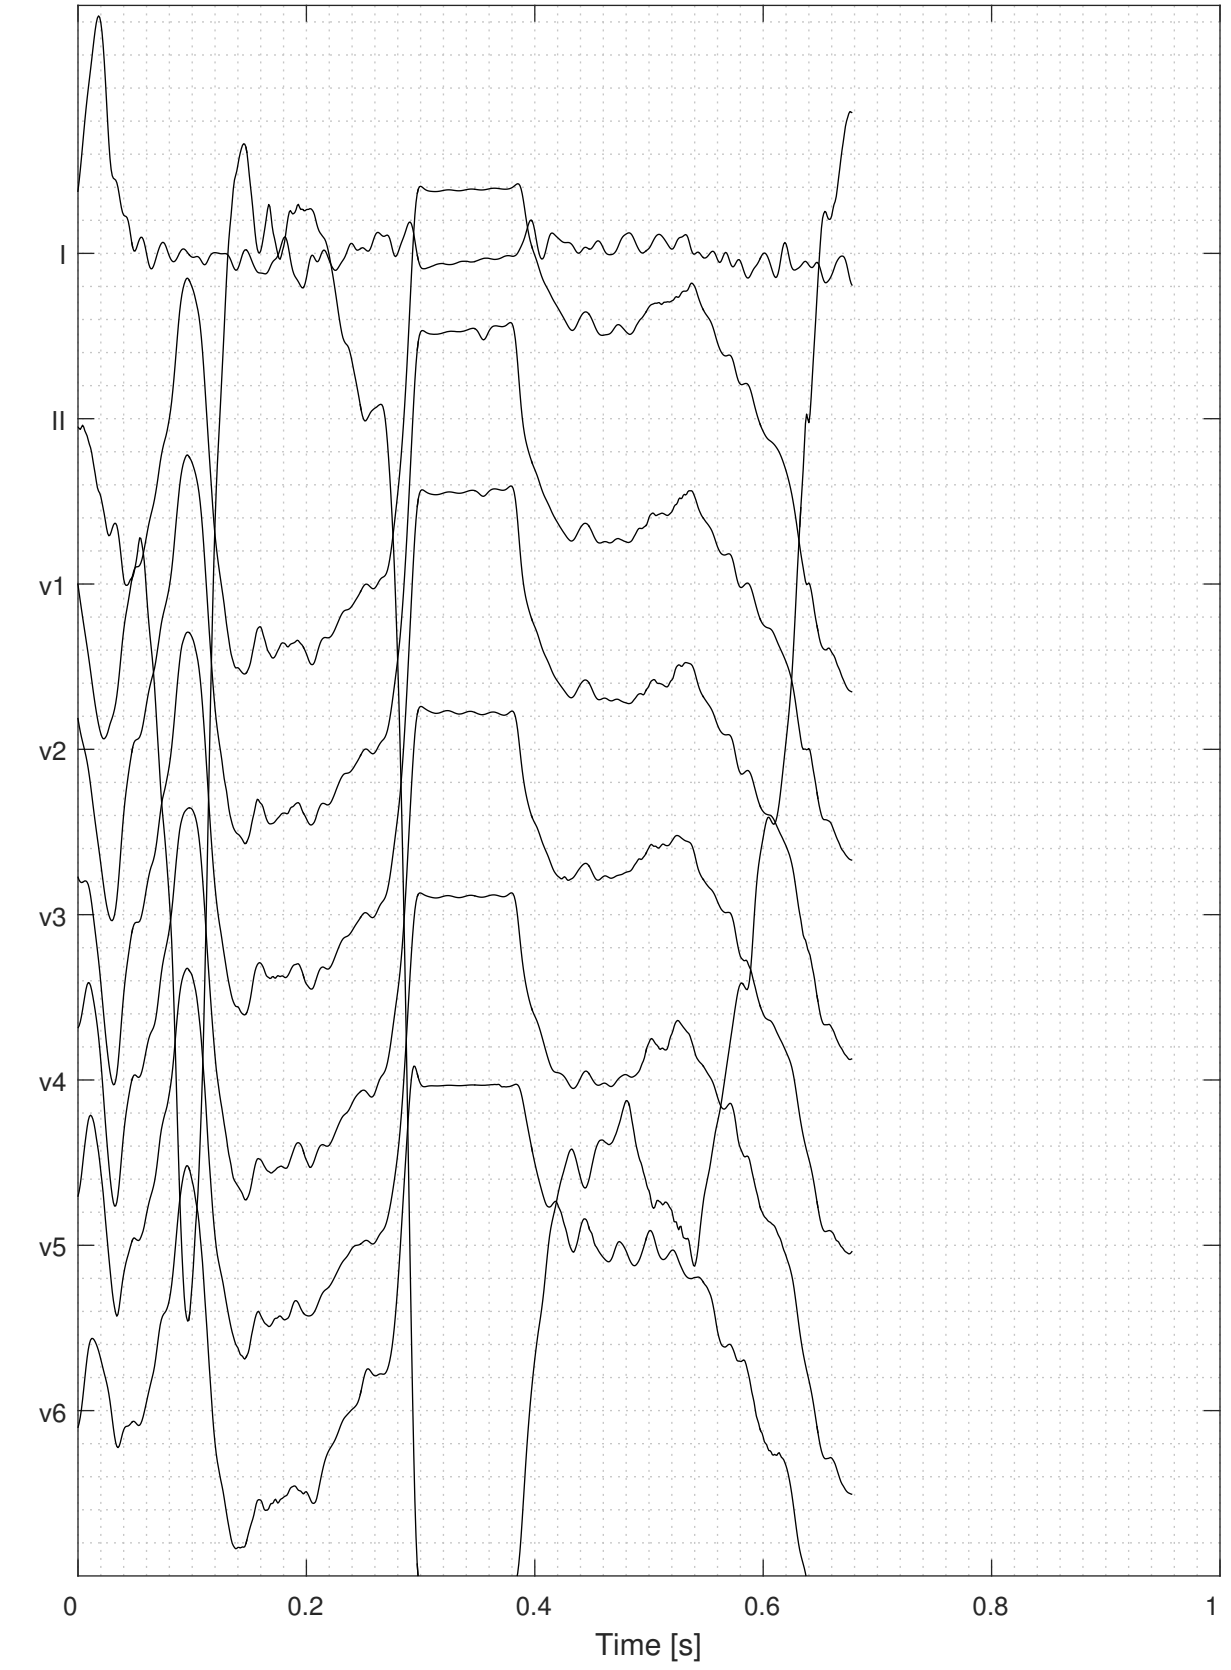

Patient 70

Low RR, Complex #: 156

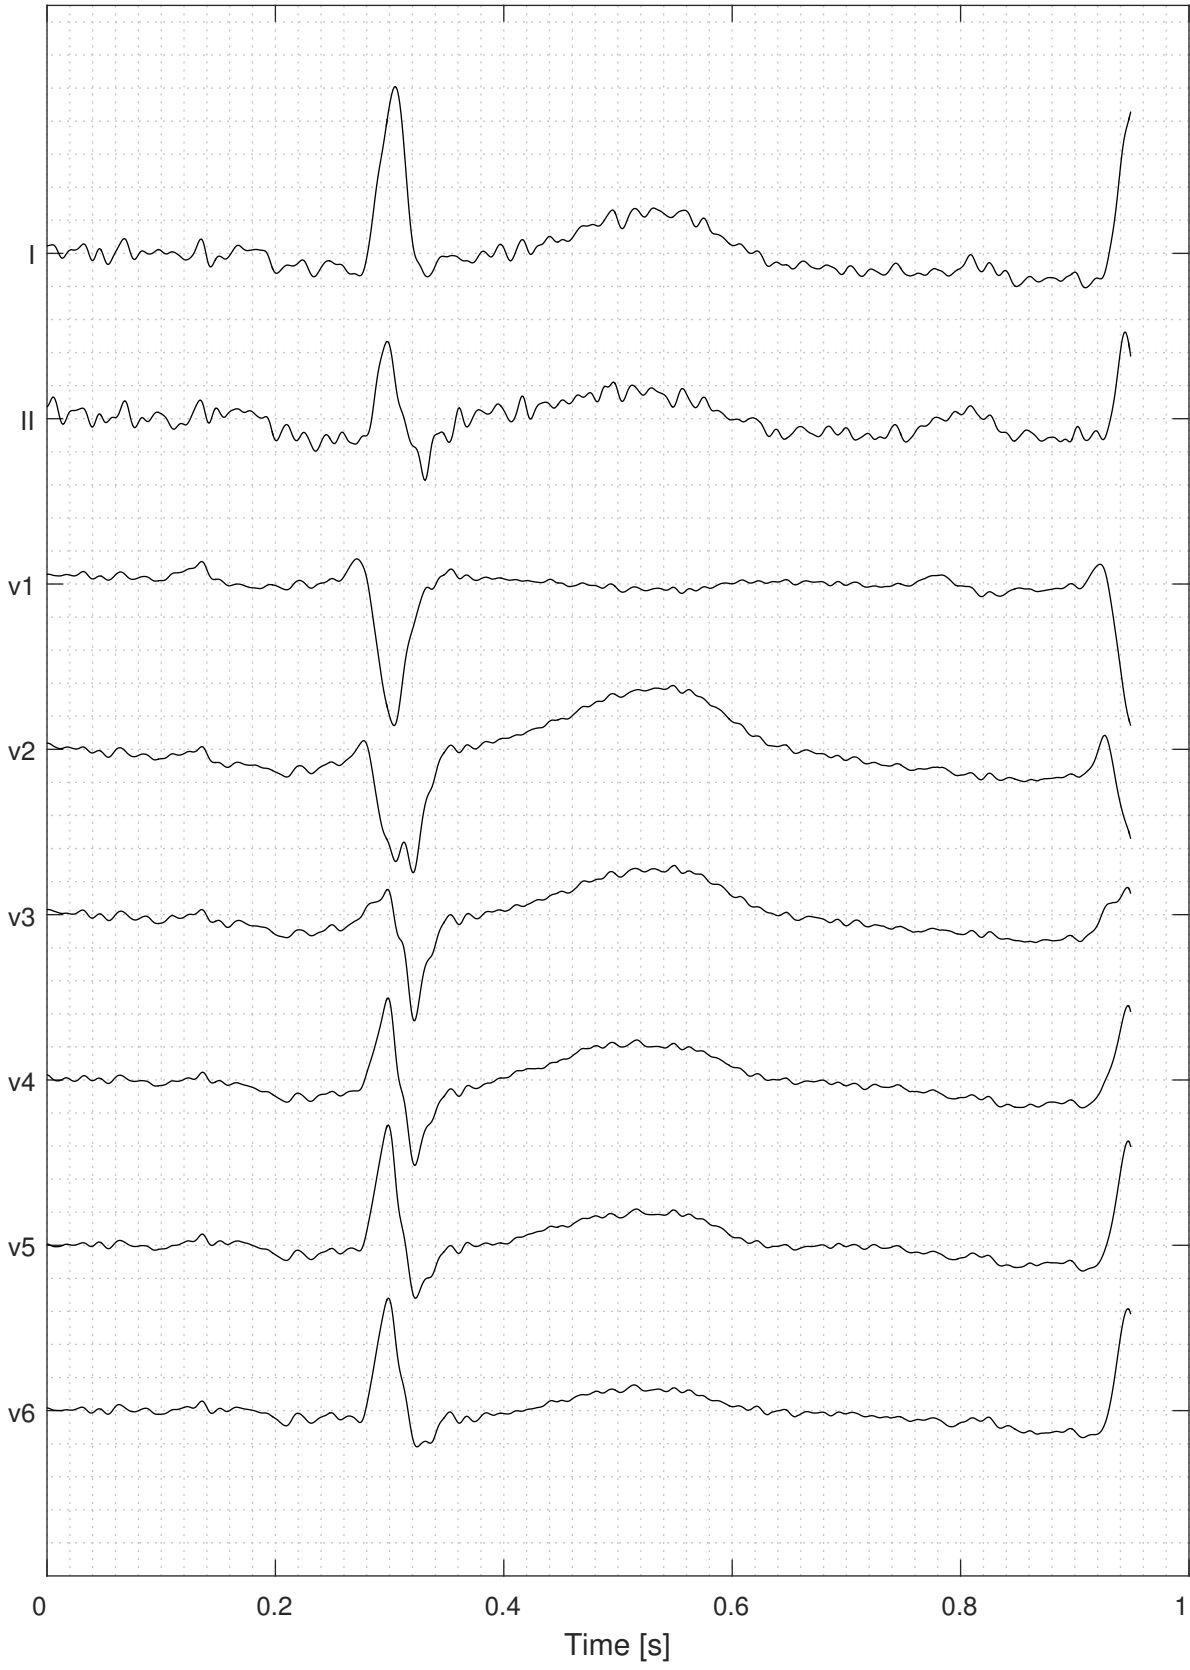

Mid RR, Complex #: 276

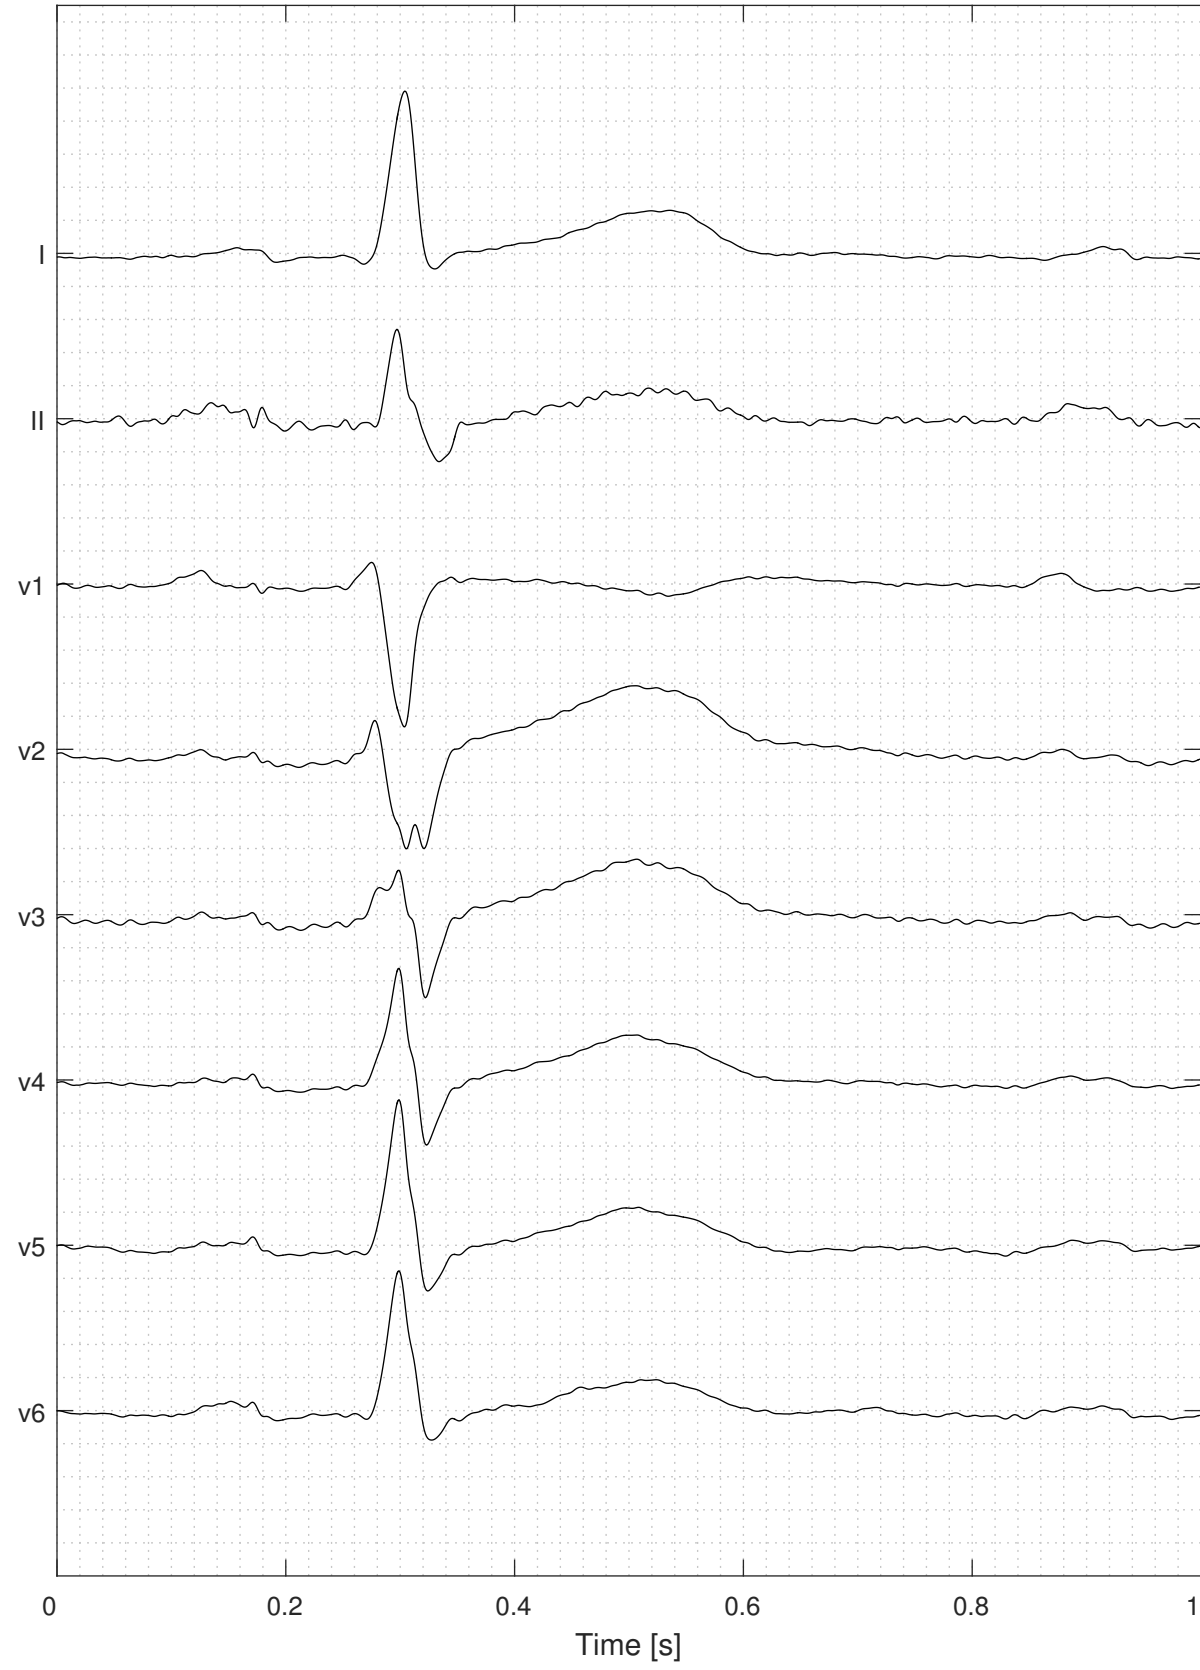

High RR, Complex #: 163

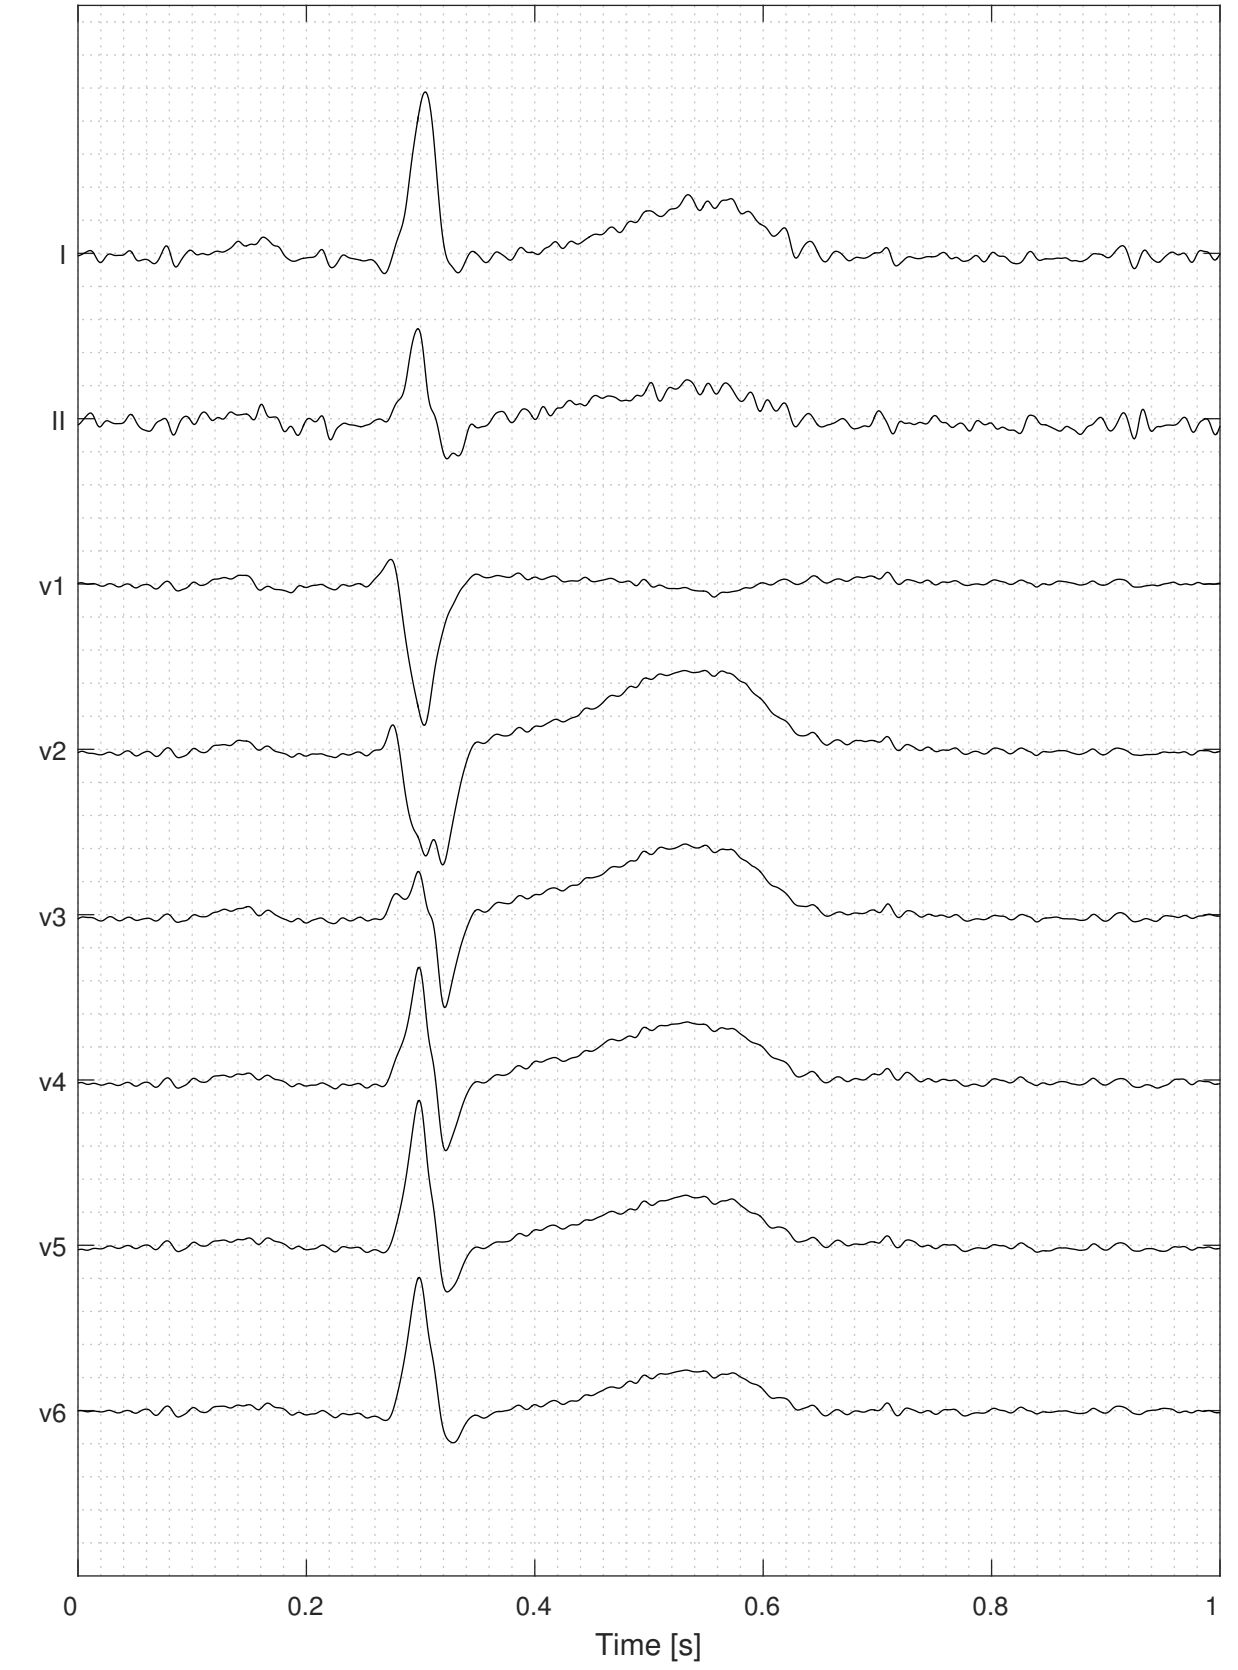

Patient 71

Low RR, Complex #: 349

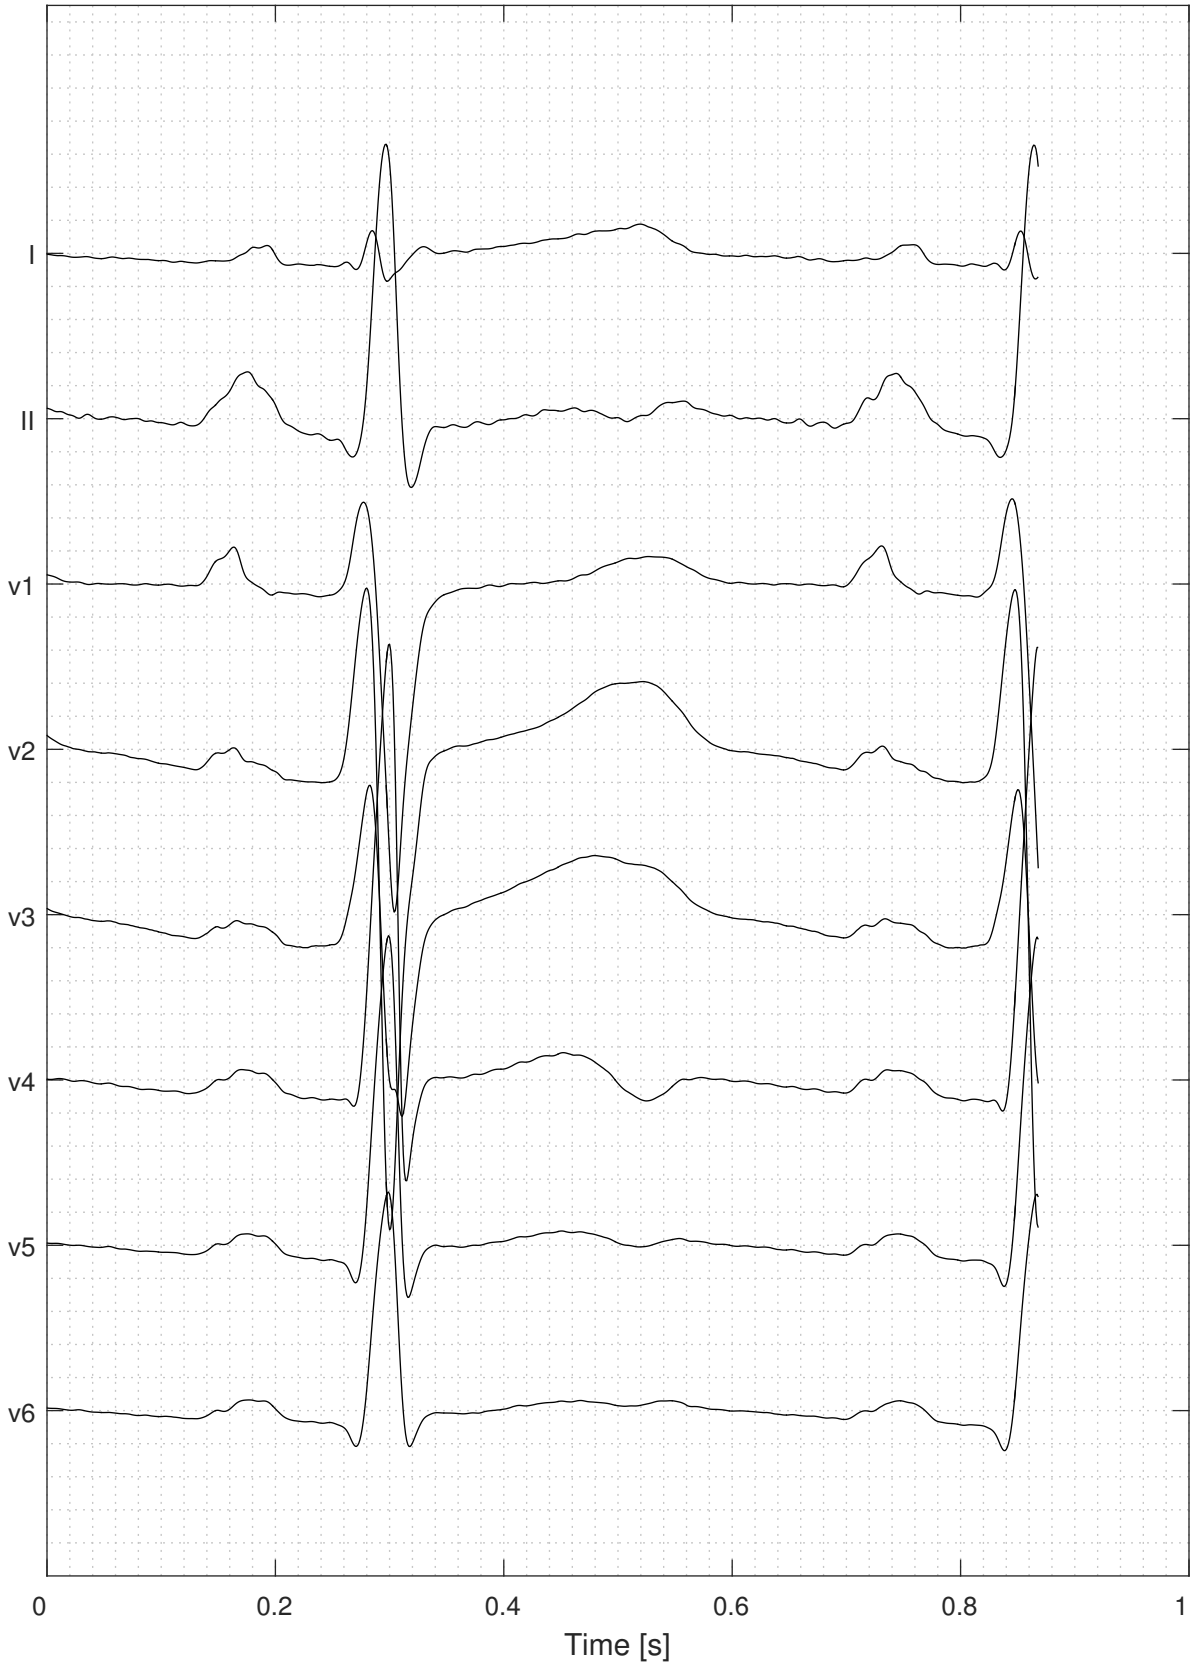

Mid RR, Complex #: 225

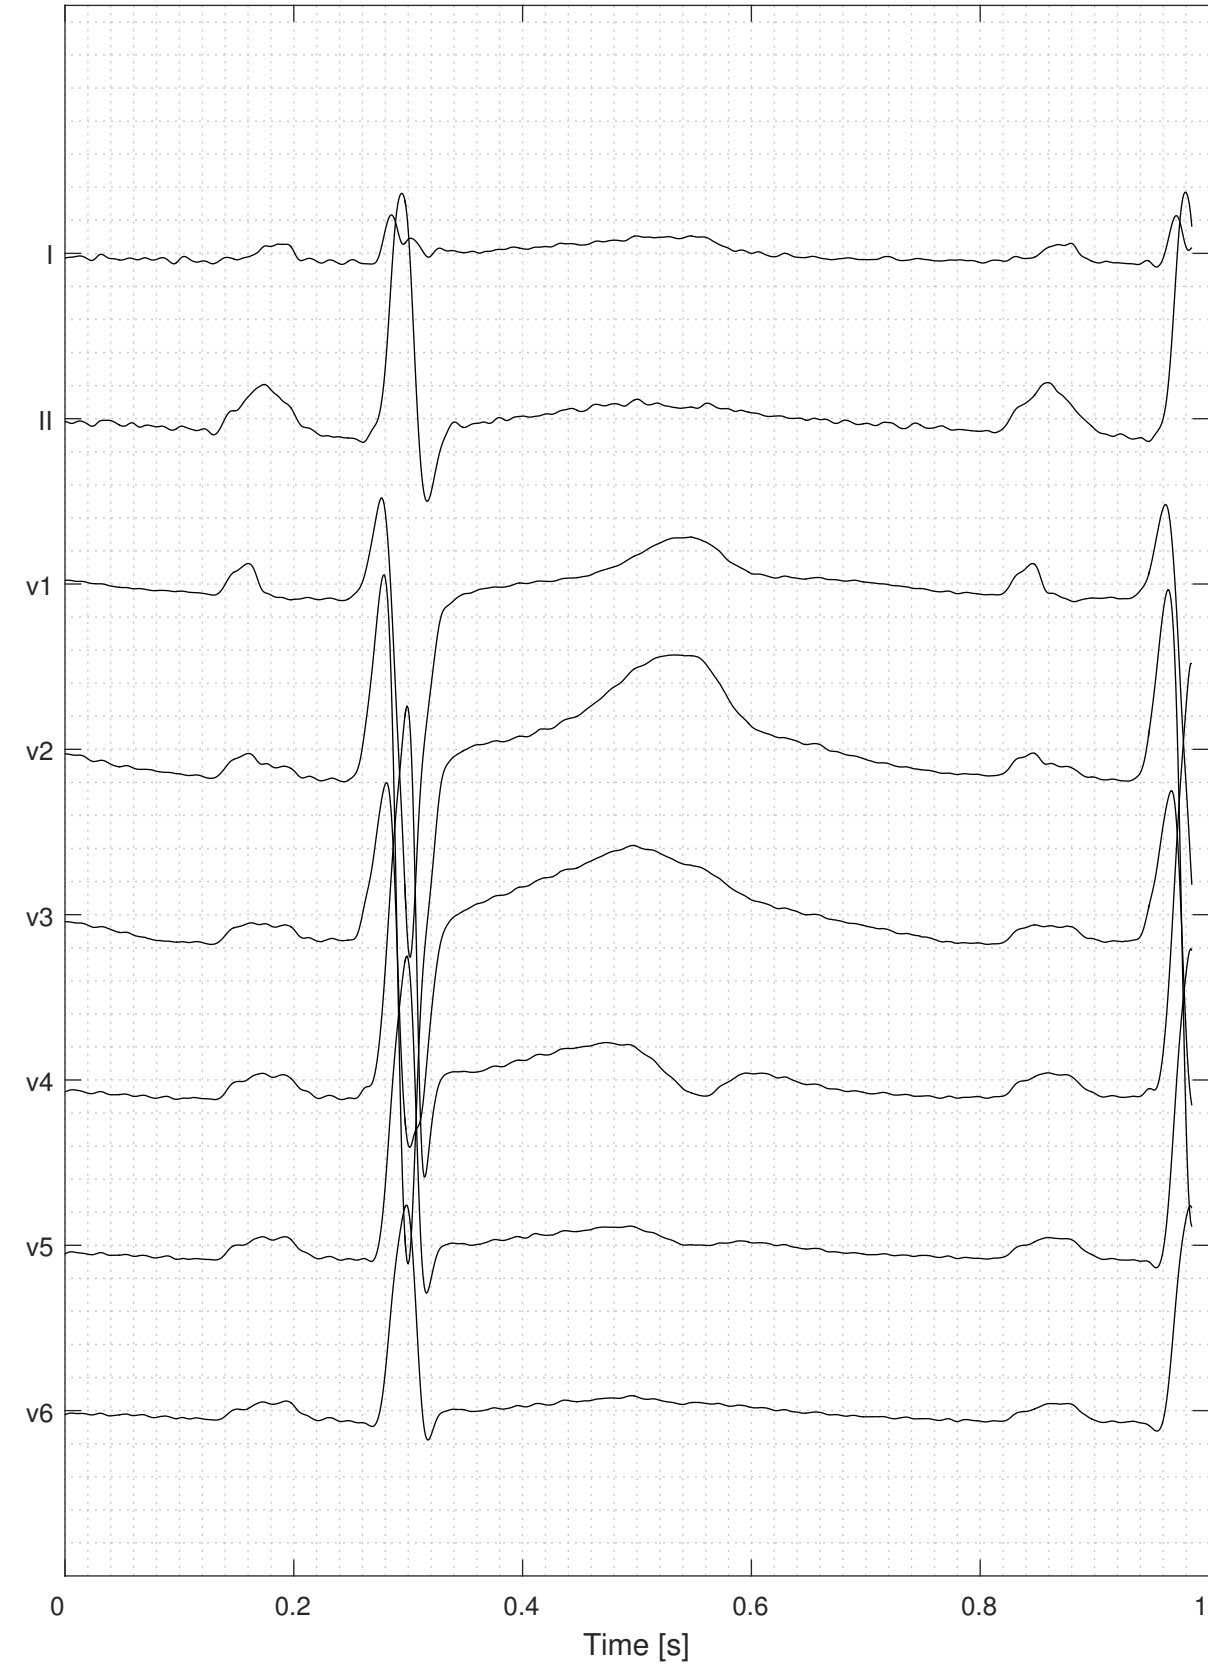

High RR, Complex #: 82

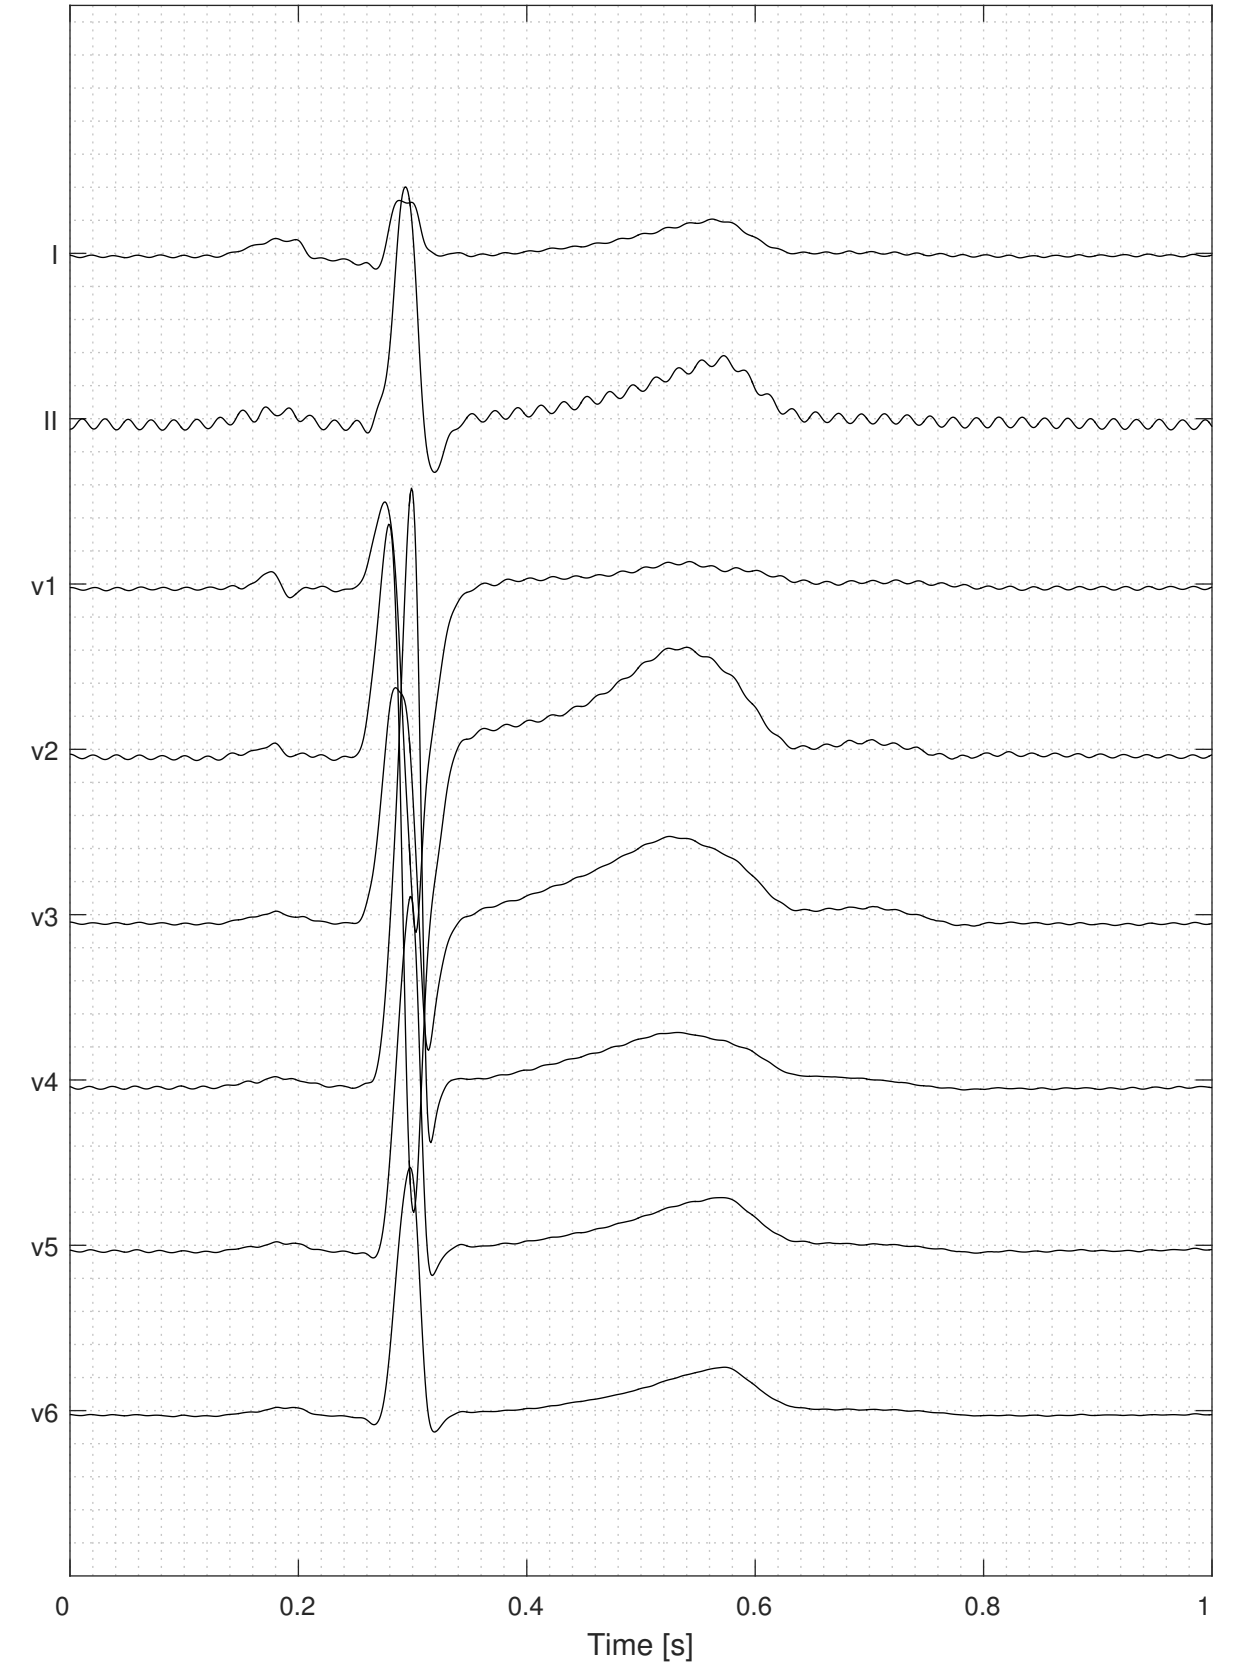

Patient 72

Low RR, Complex #: 269

Mid RR, Complex #: 55

High RR, Complex #: 38

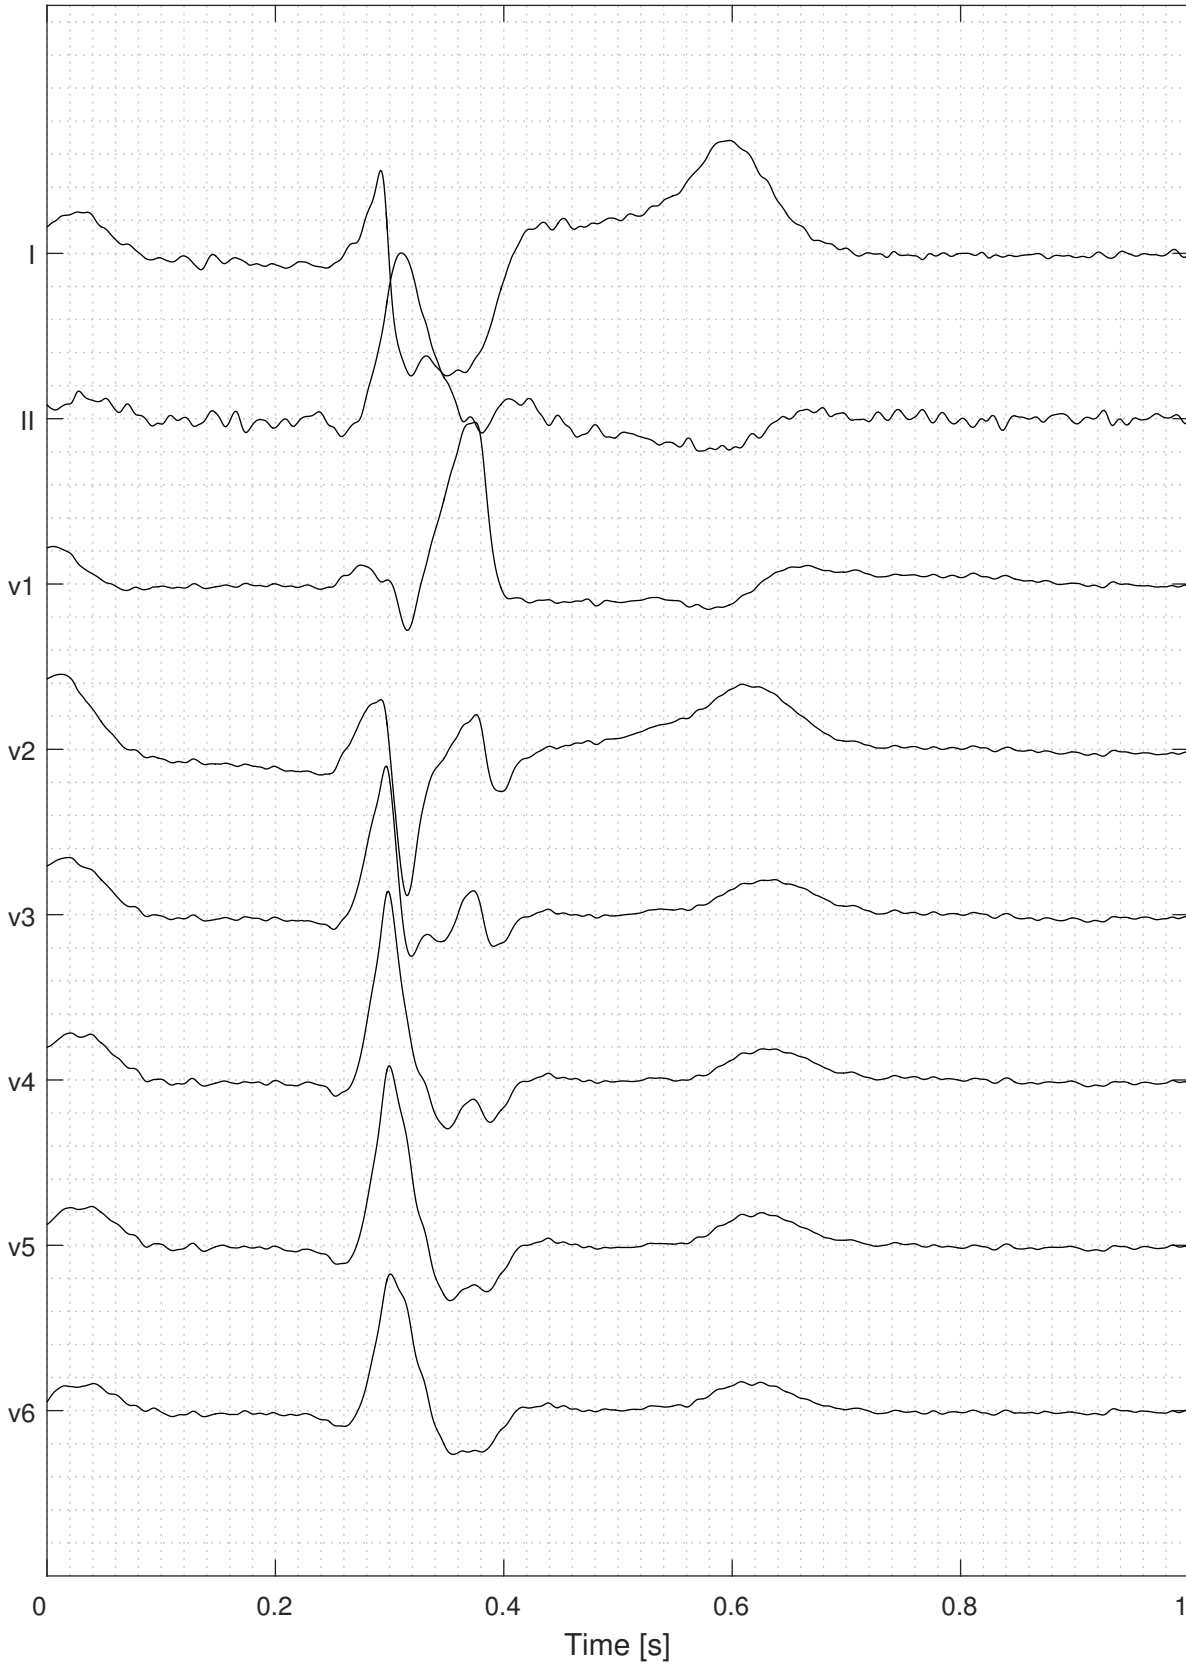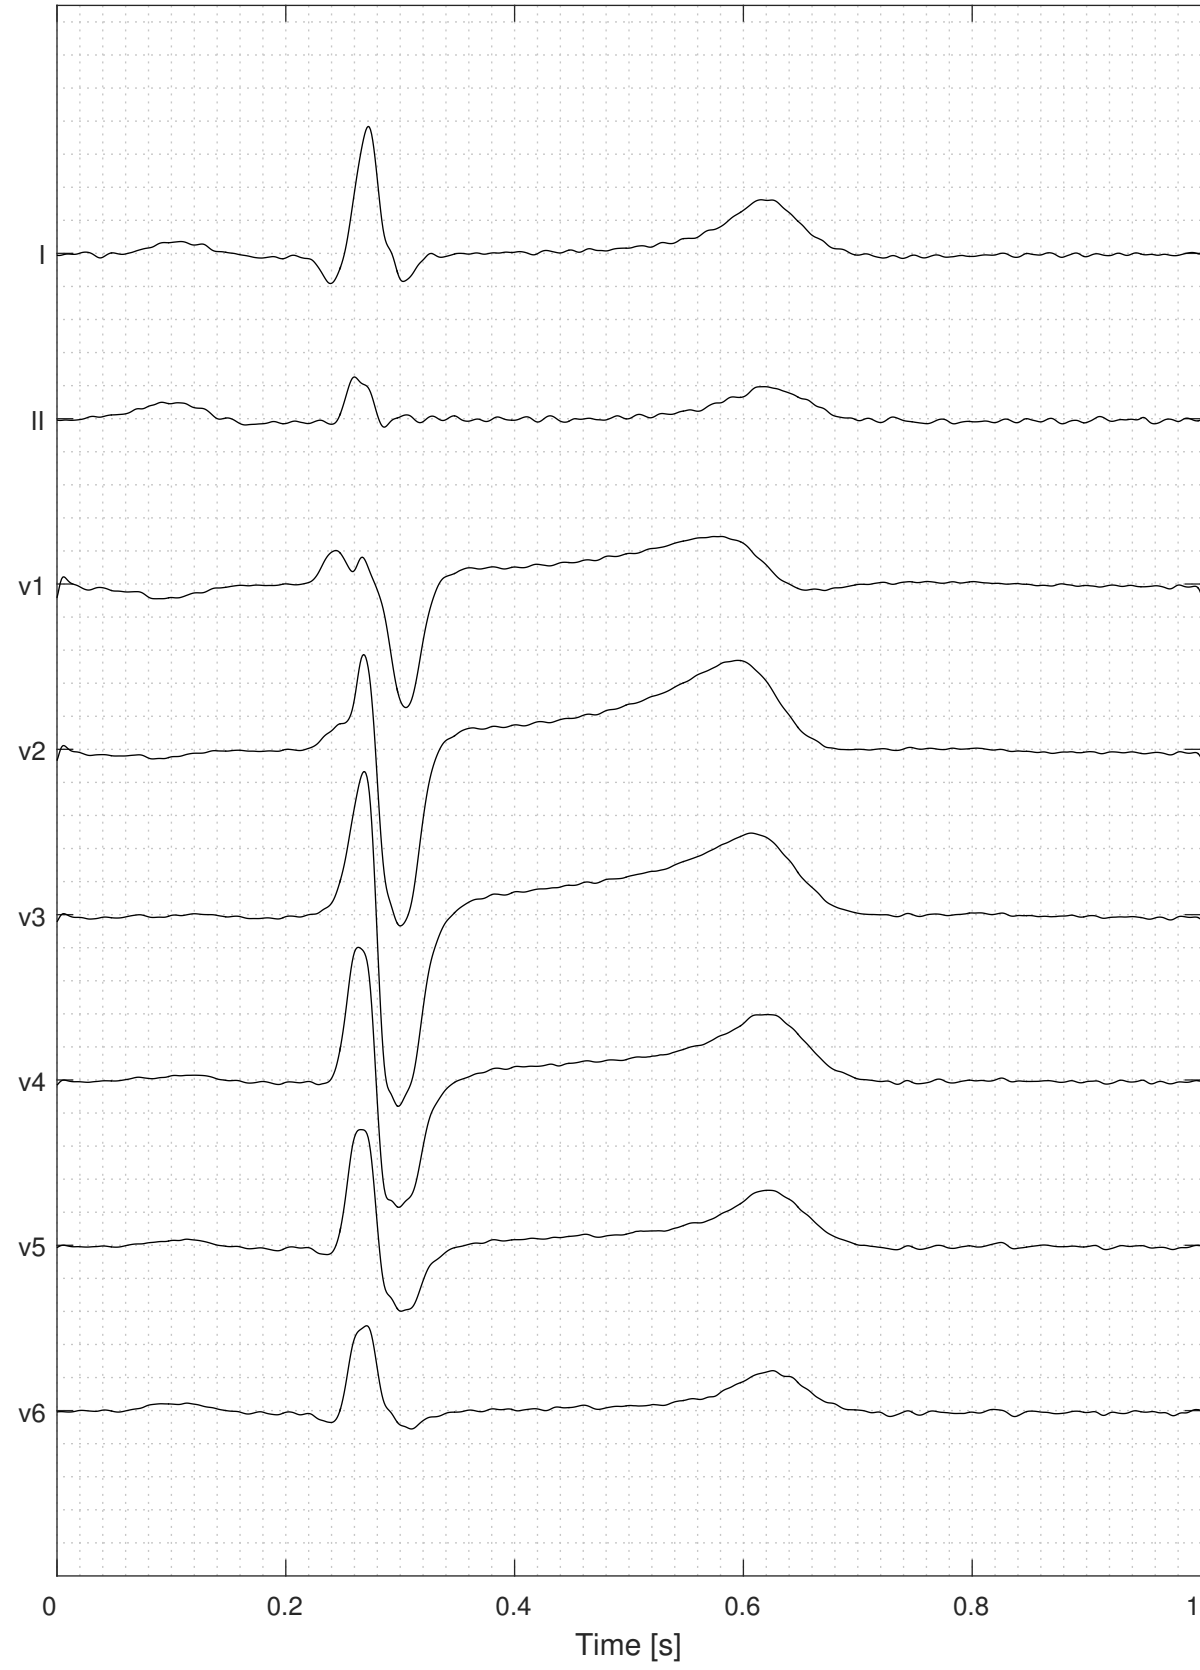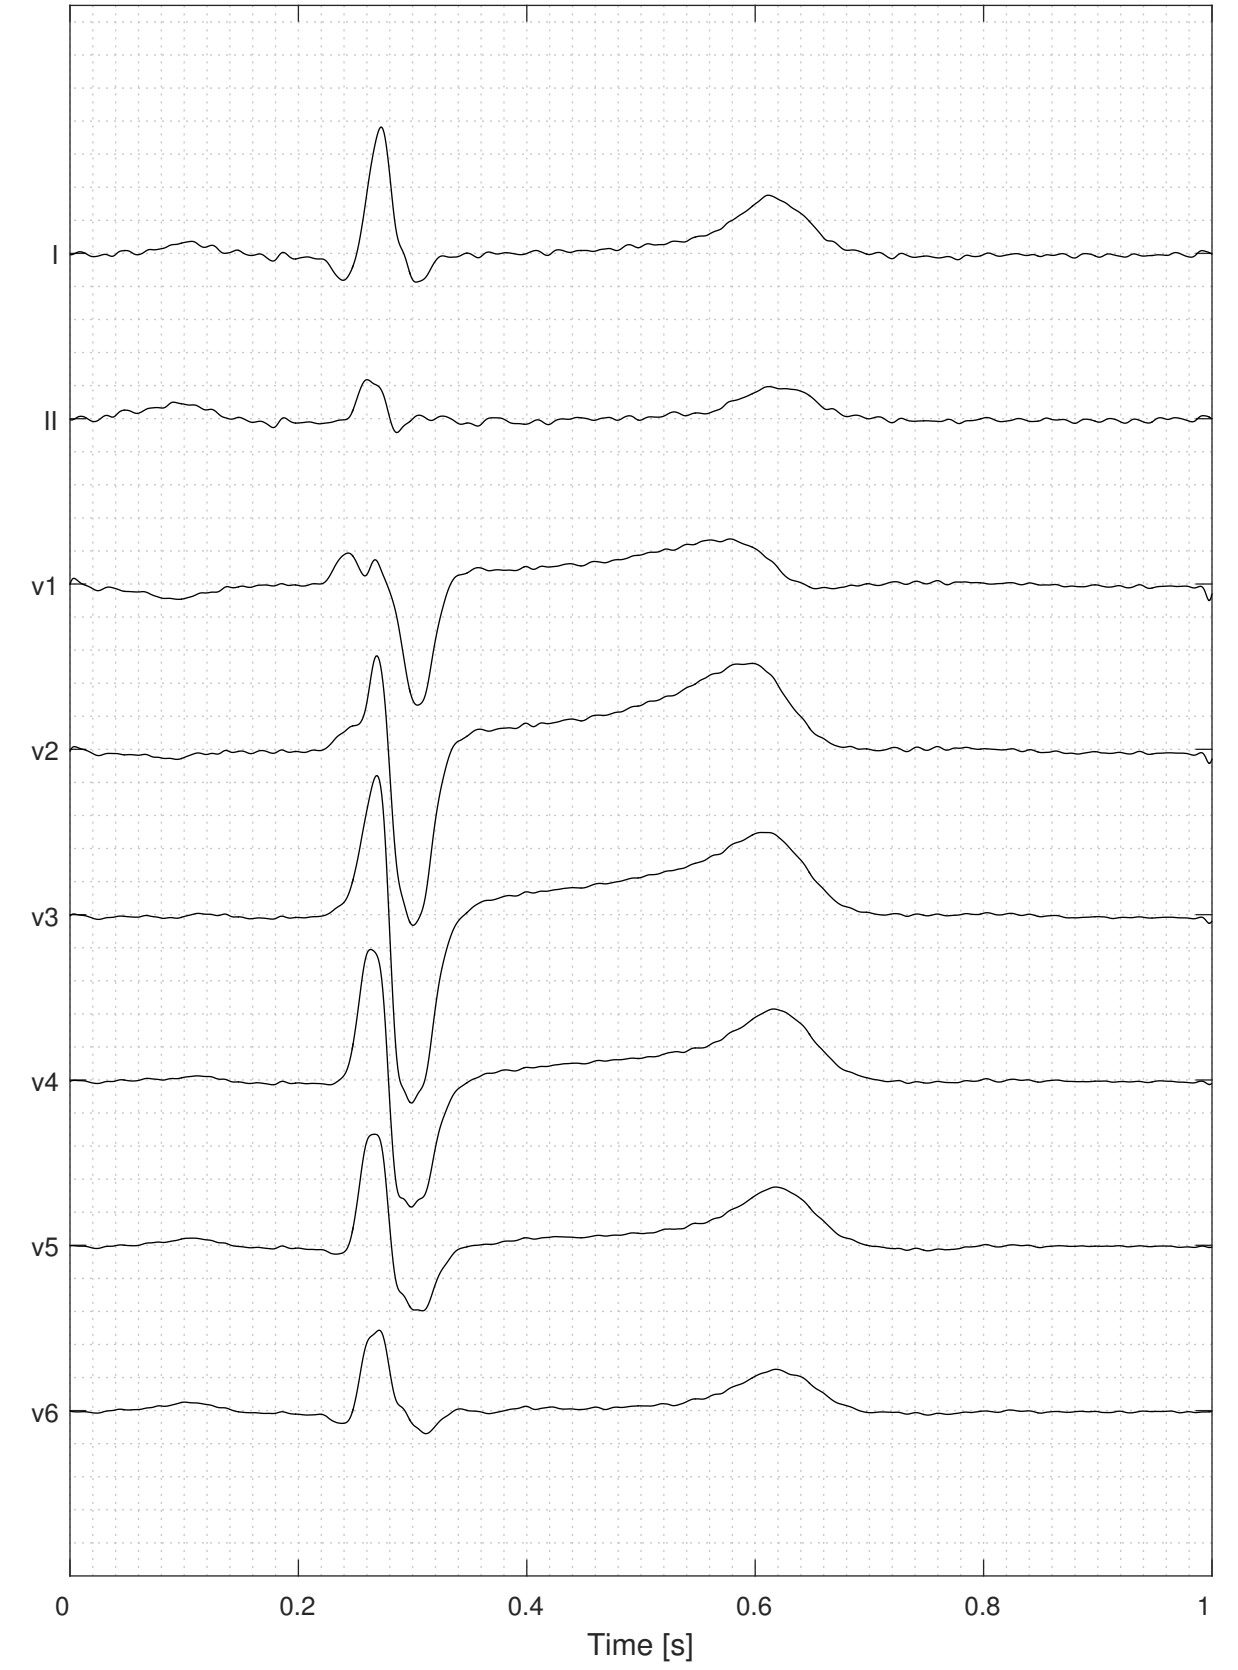



Patient 73

Low RR, Complex #: 314

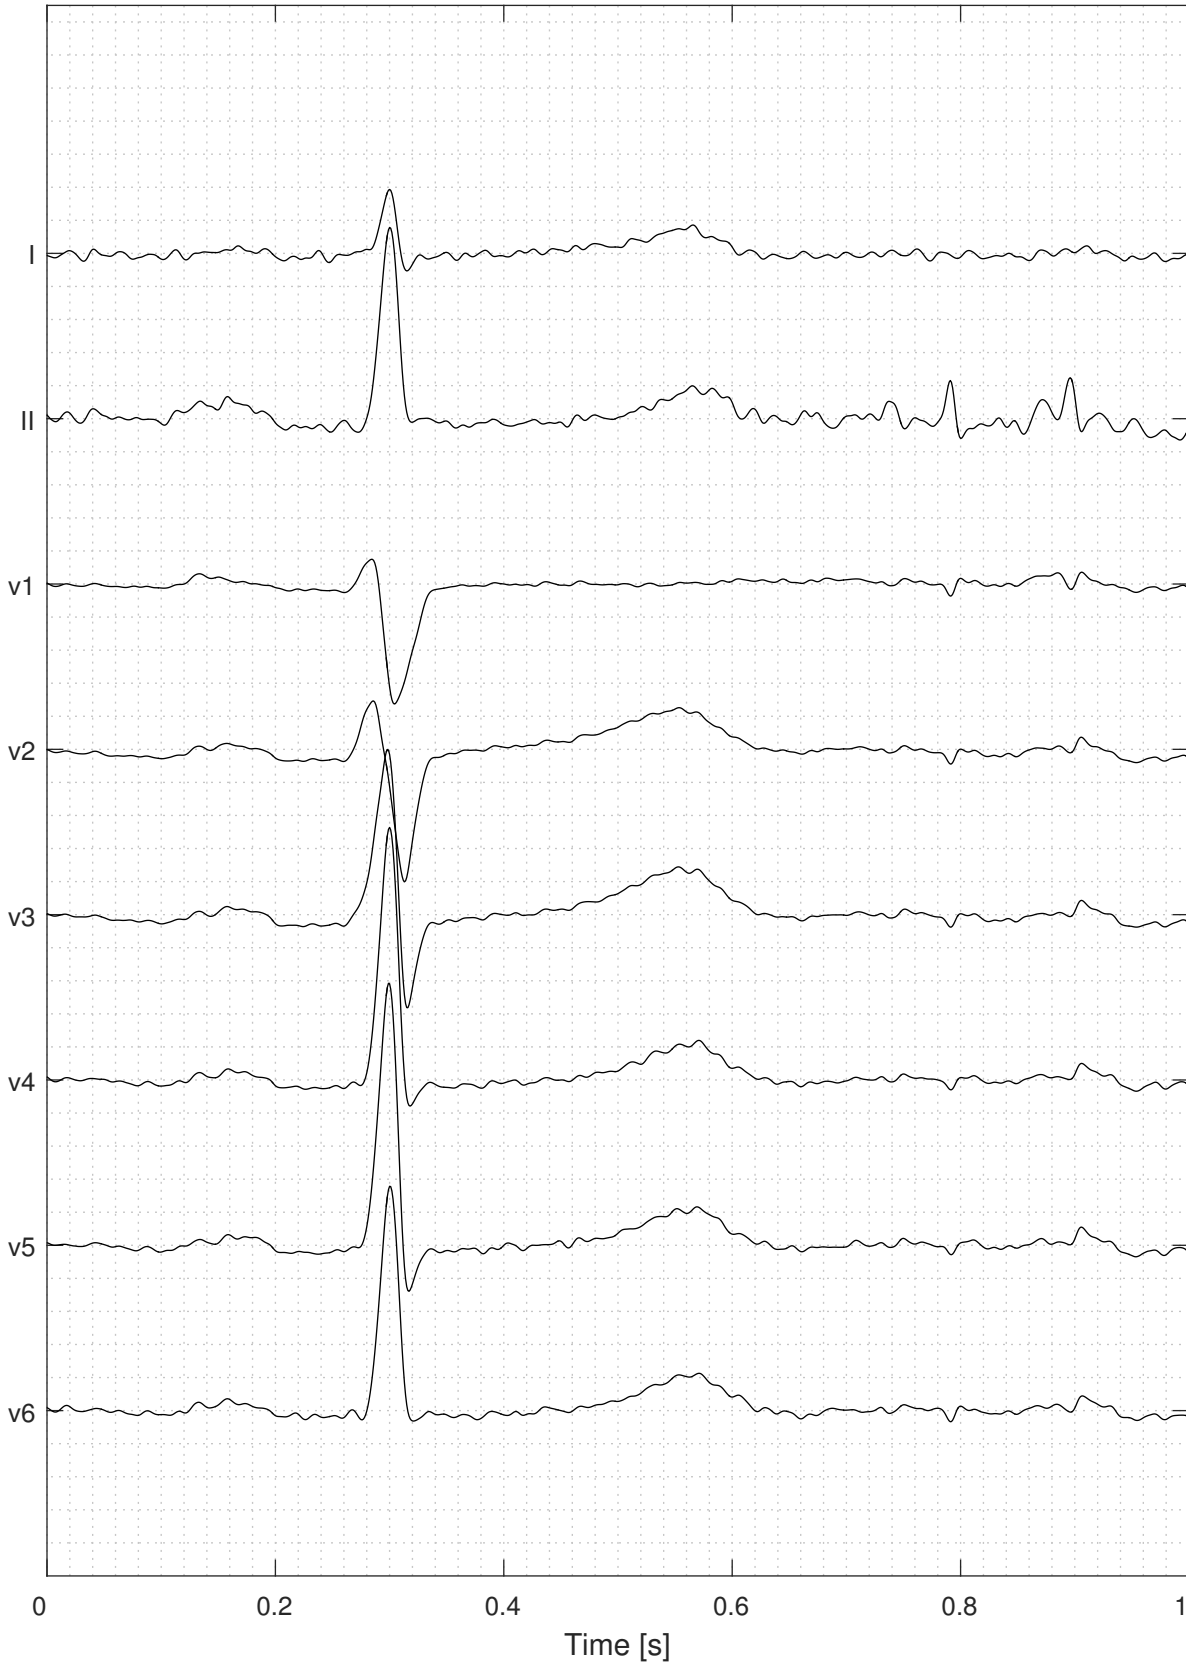

Mid RR, Complex #: 187

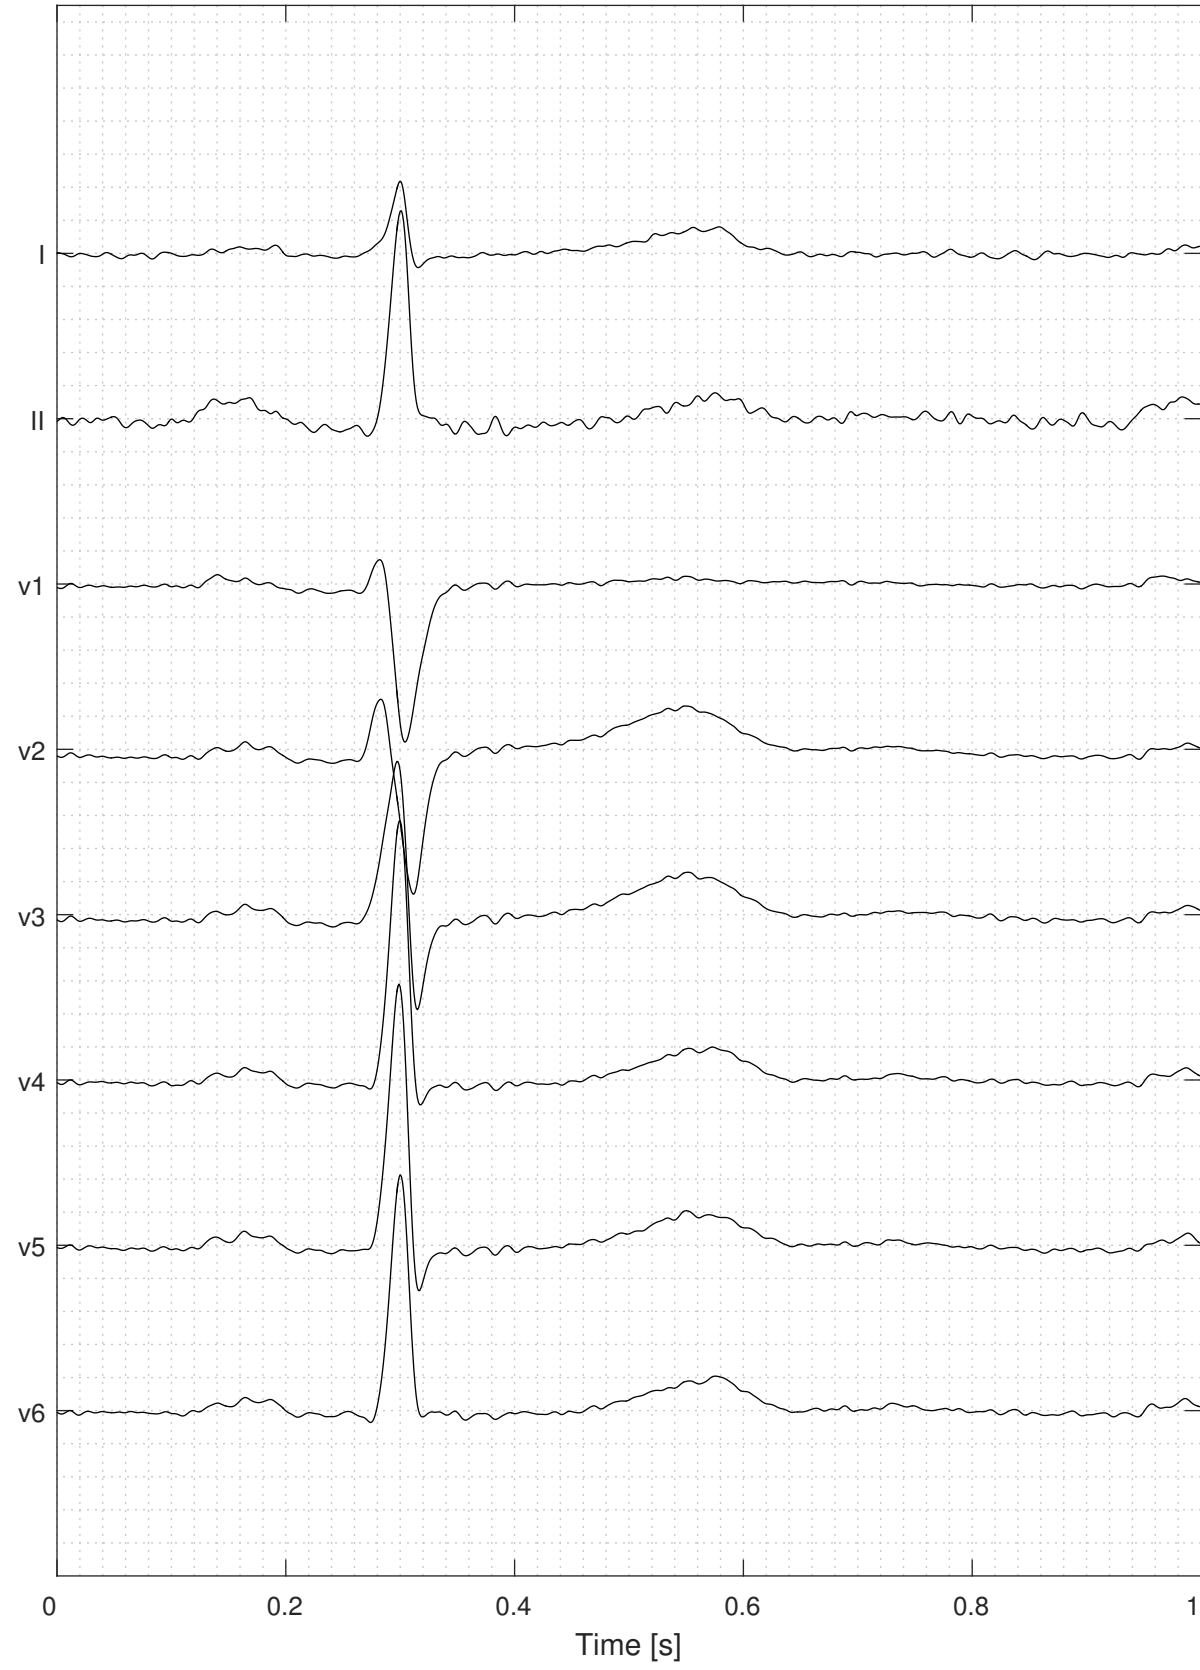

High RR, Complex #: 162

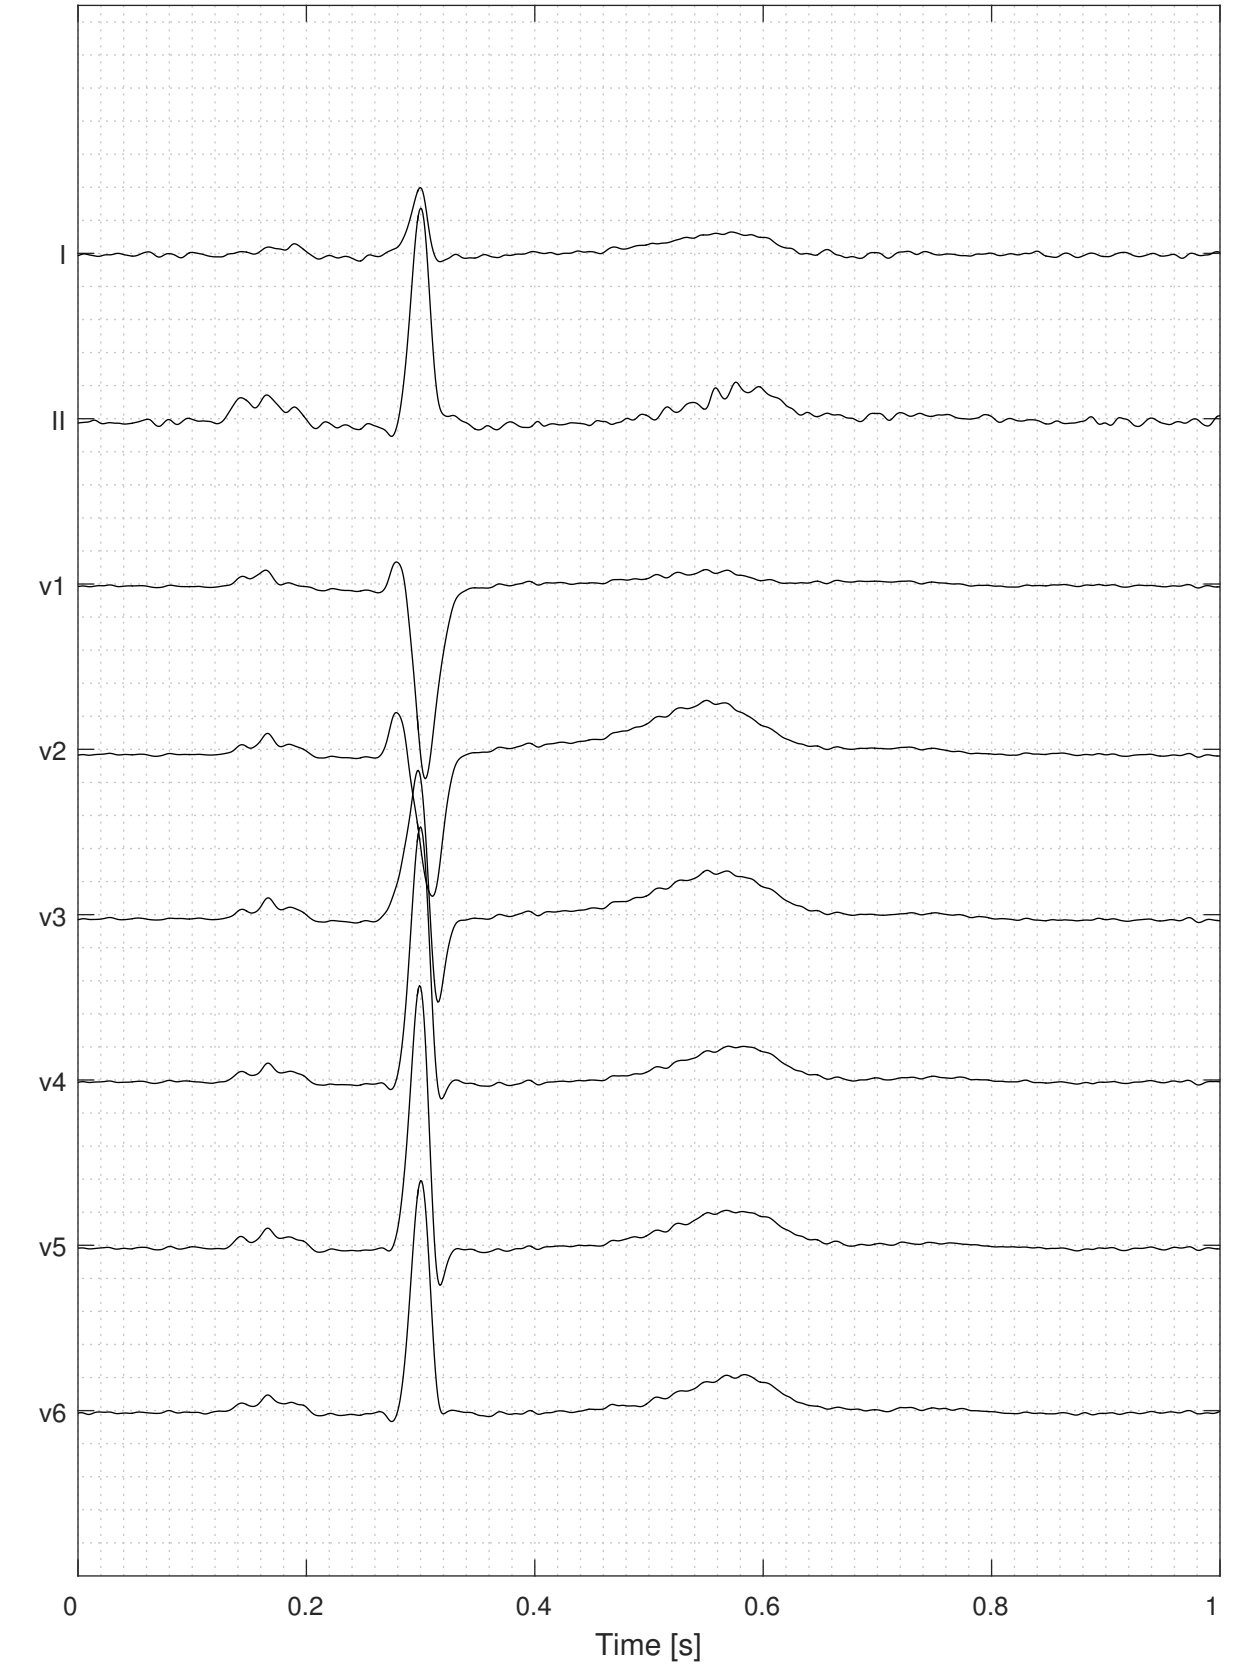

Patient 74

Low RR, Complex #: 143

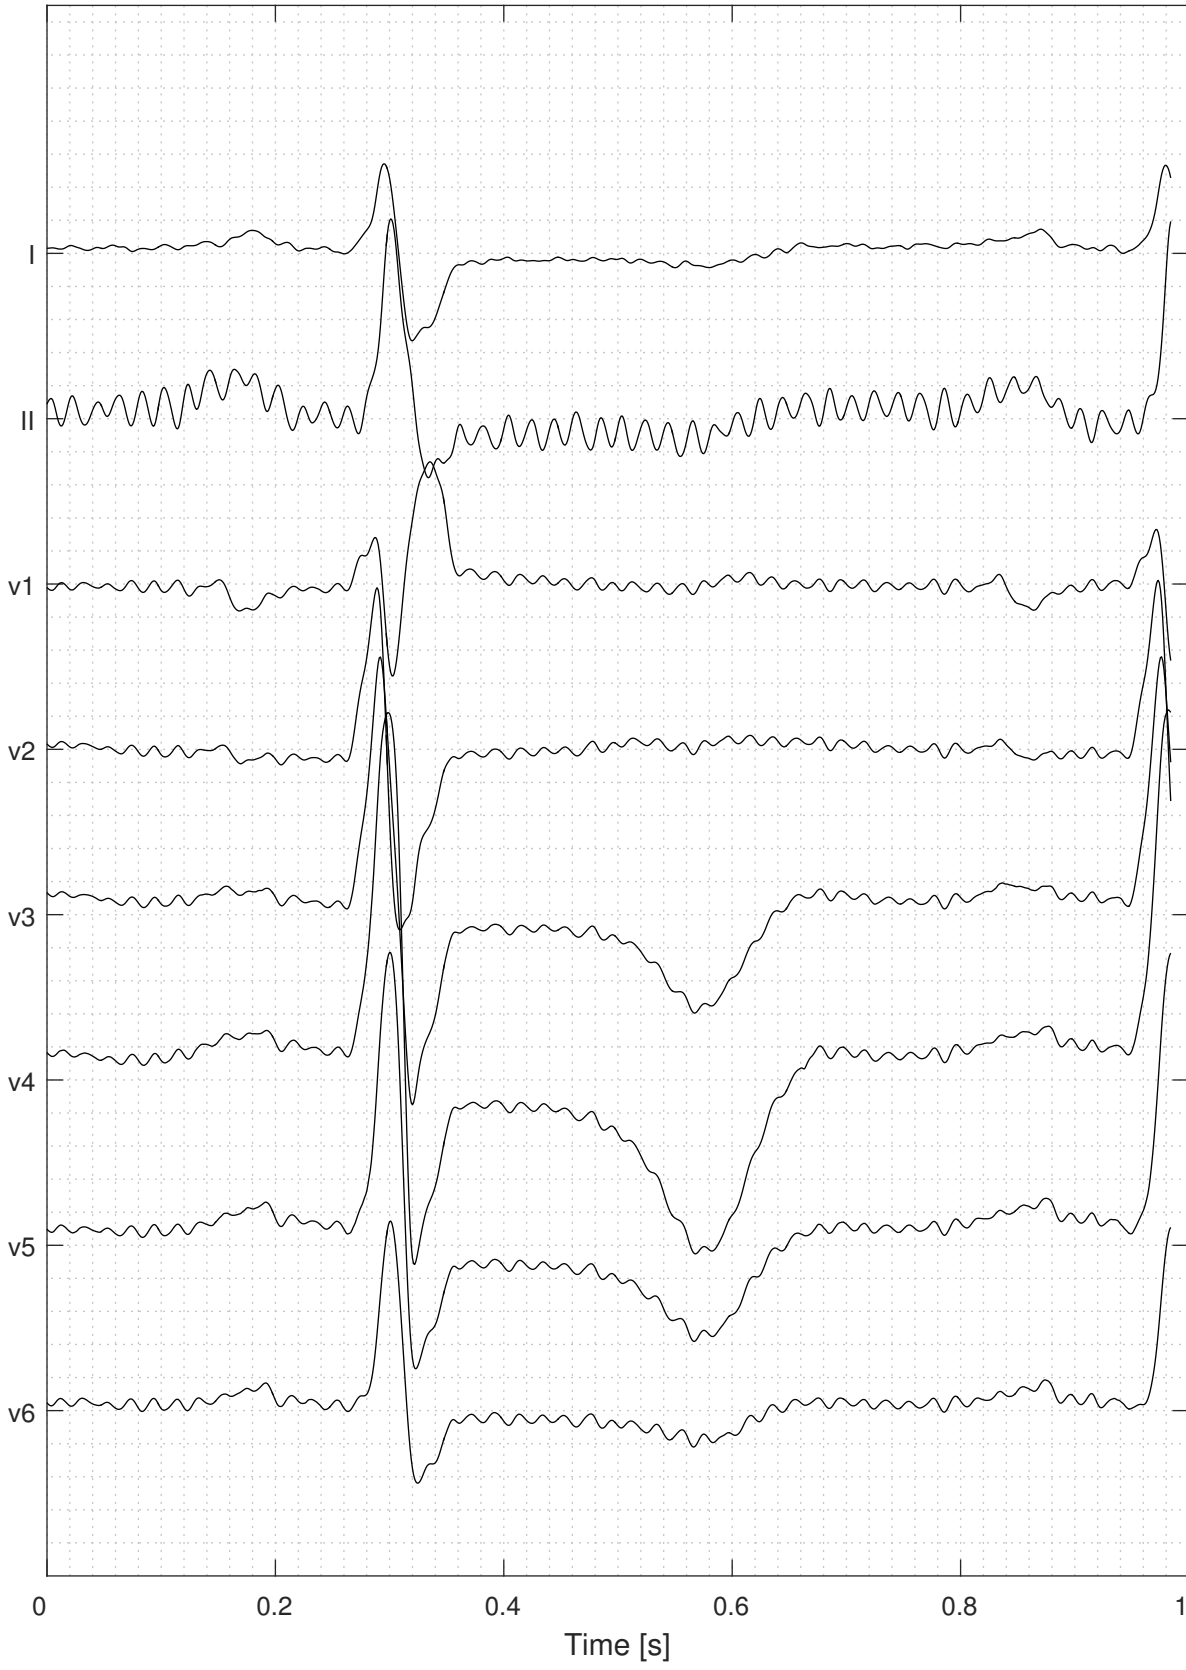

Mid RR, Complex #: 148

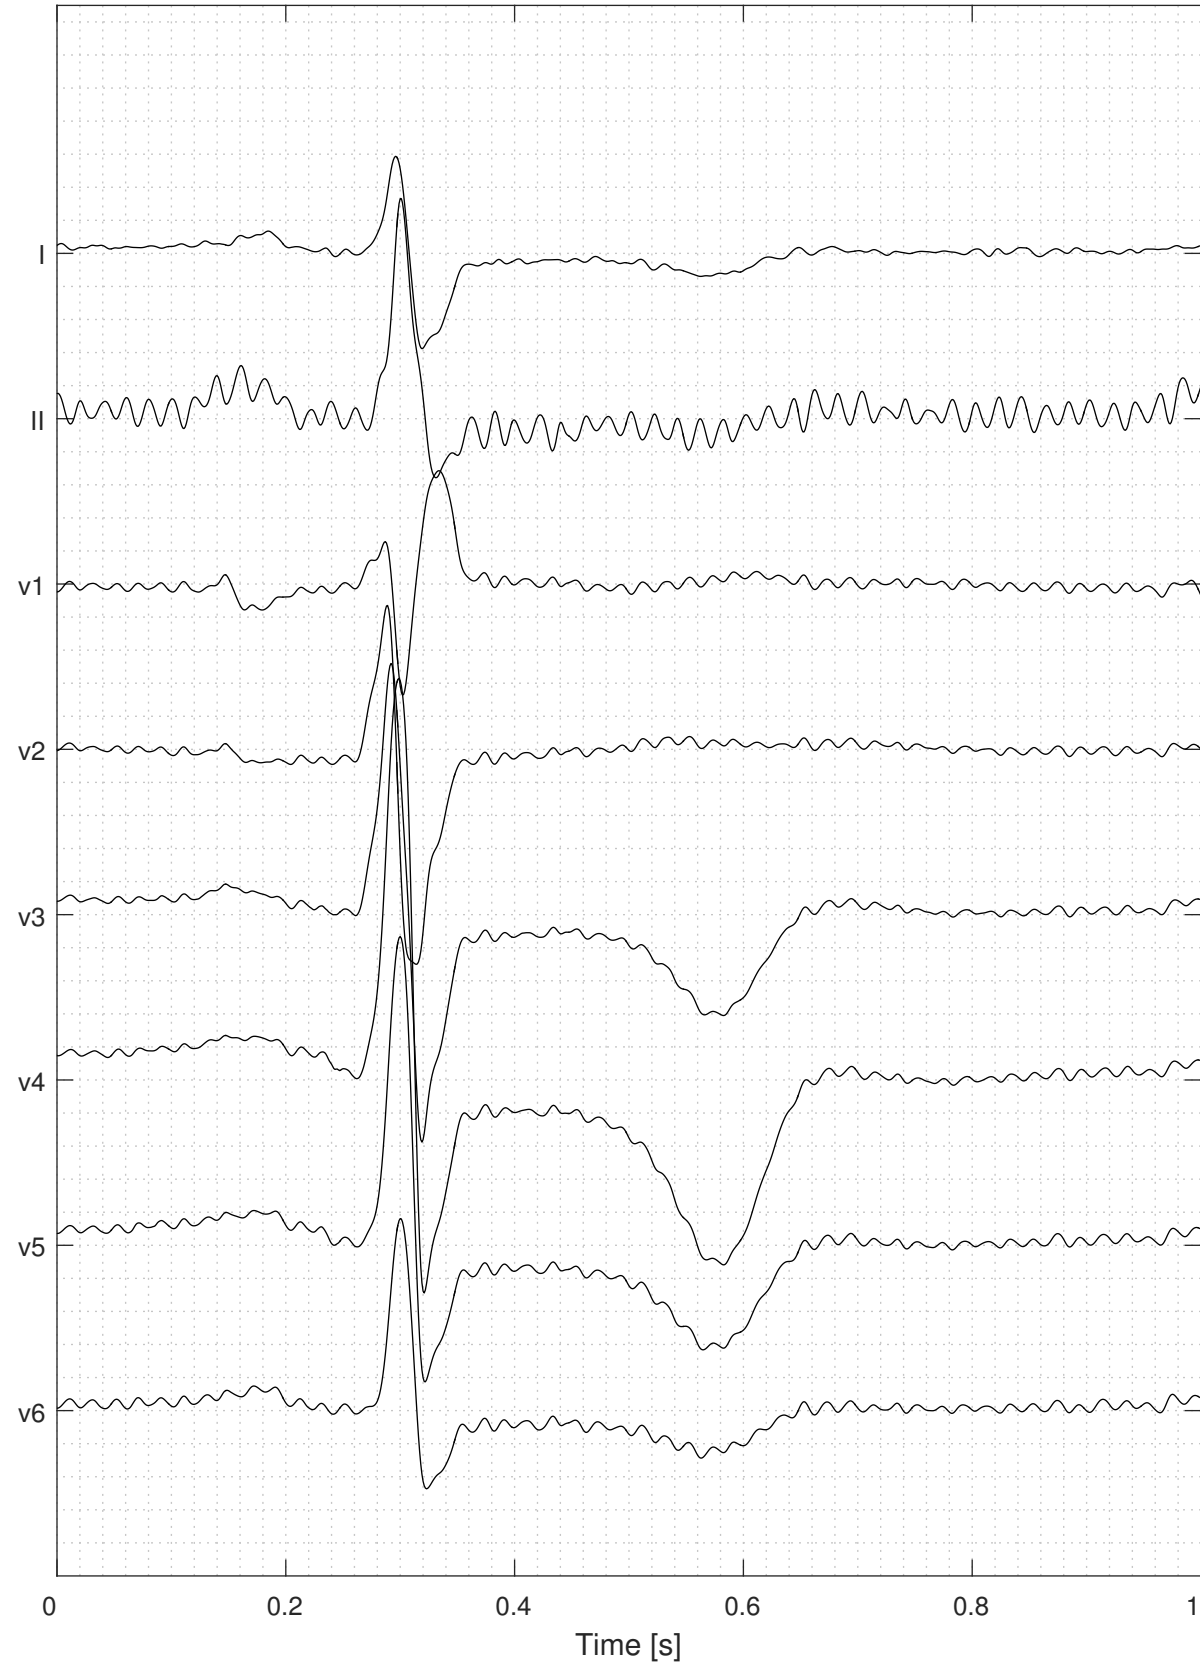

High RR, Complex #: 14

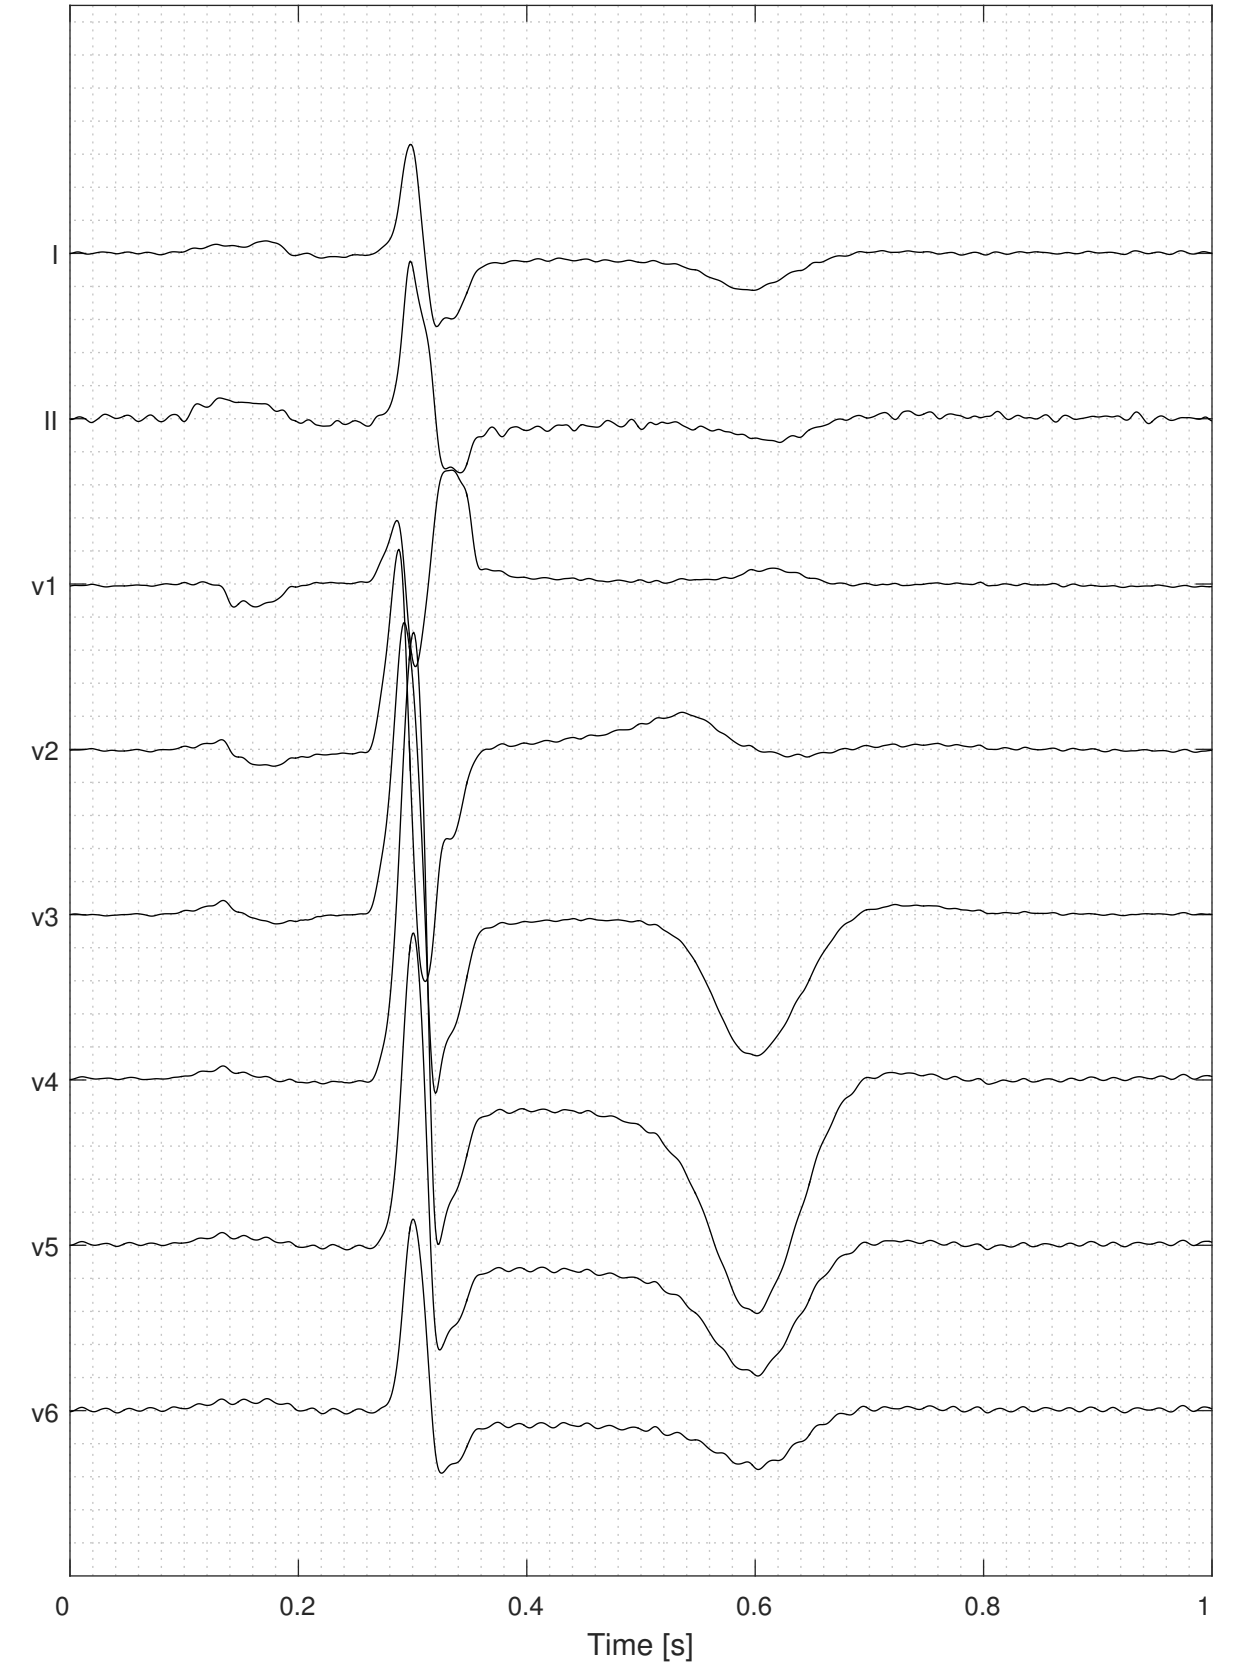

Patient 75

Low RR, Complex #: 219

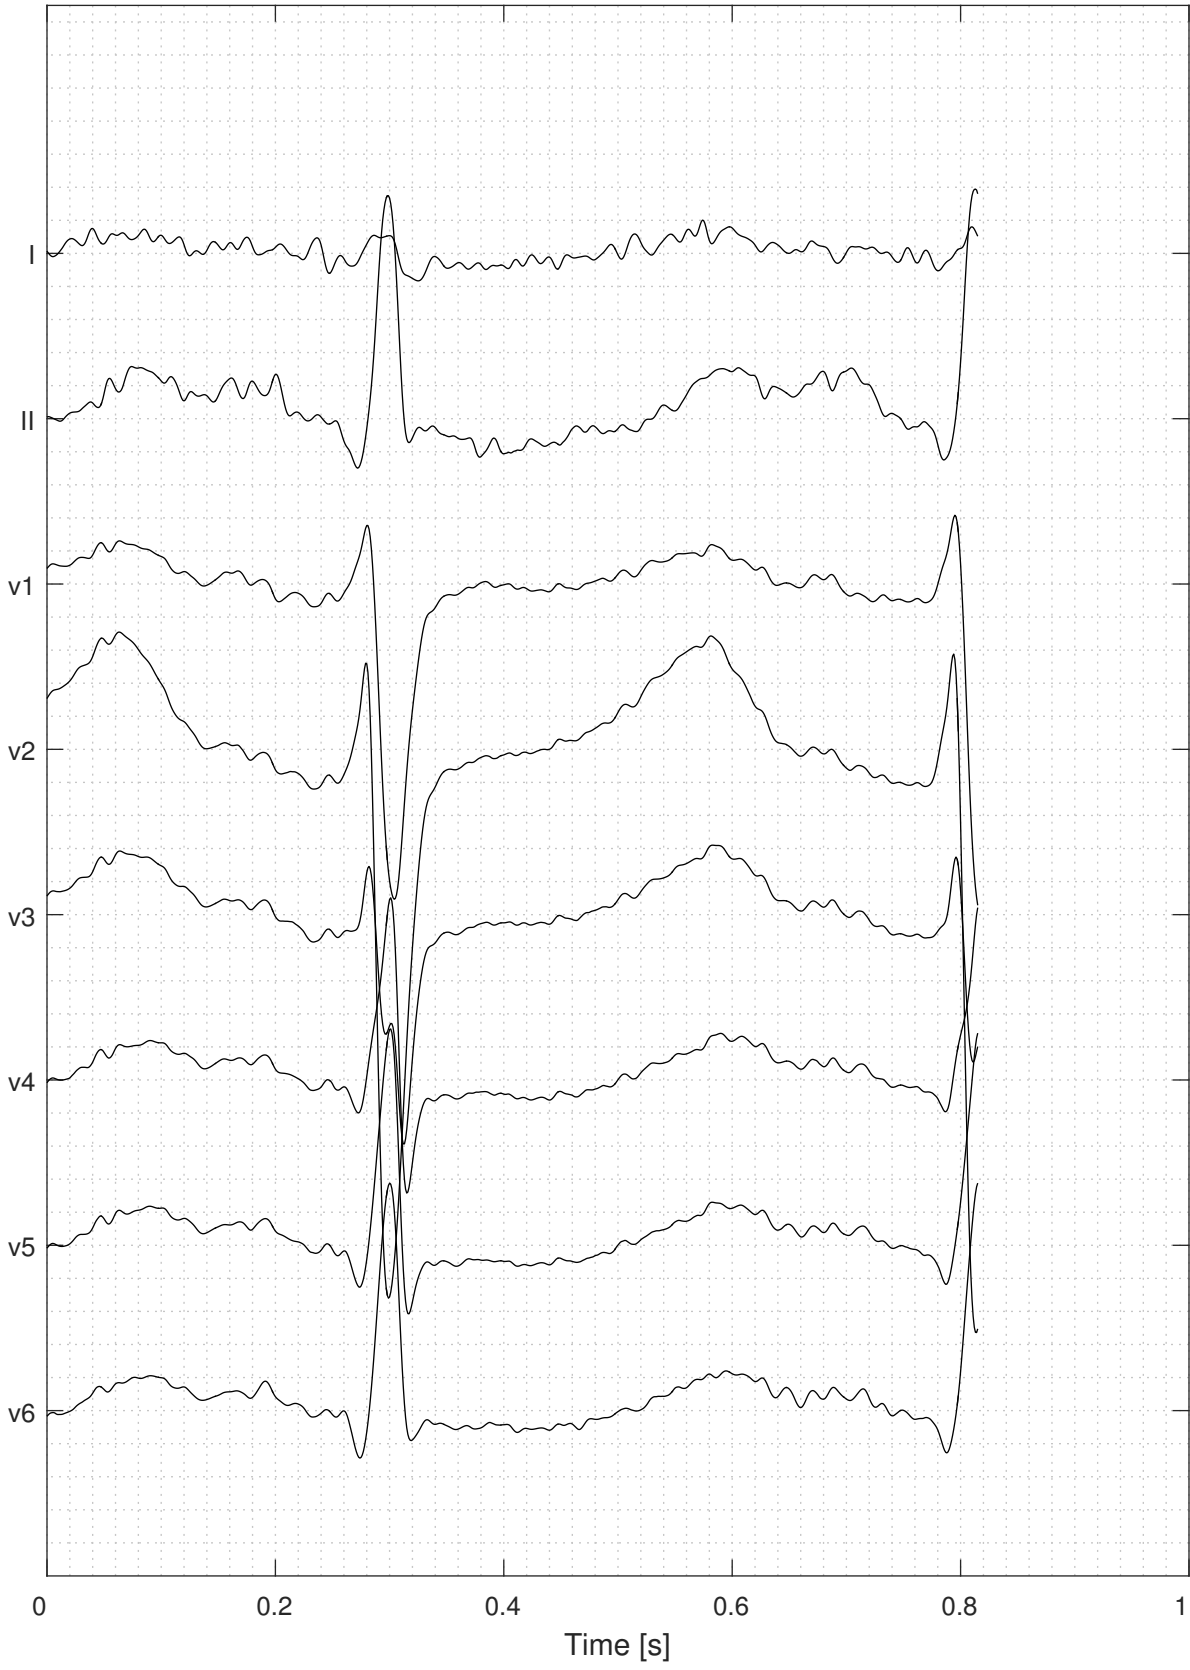

Mid RR, Complex #: 142

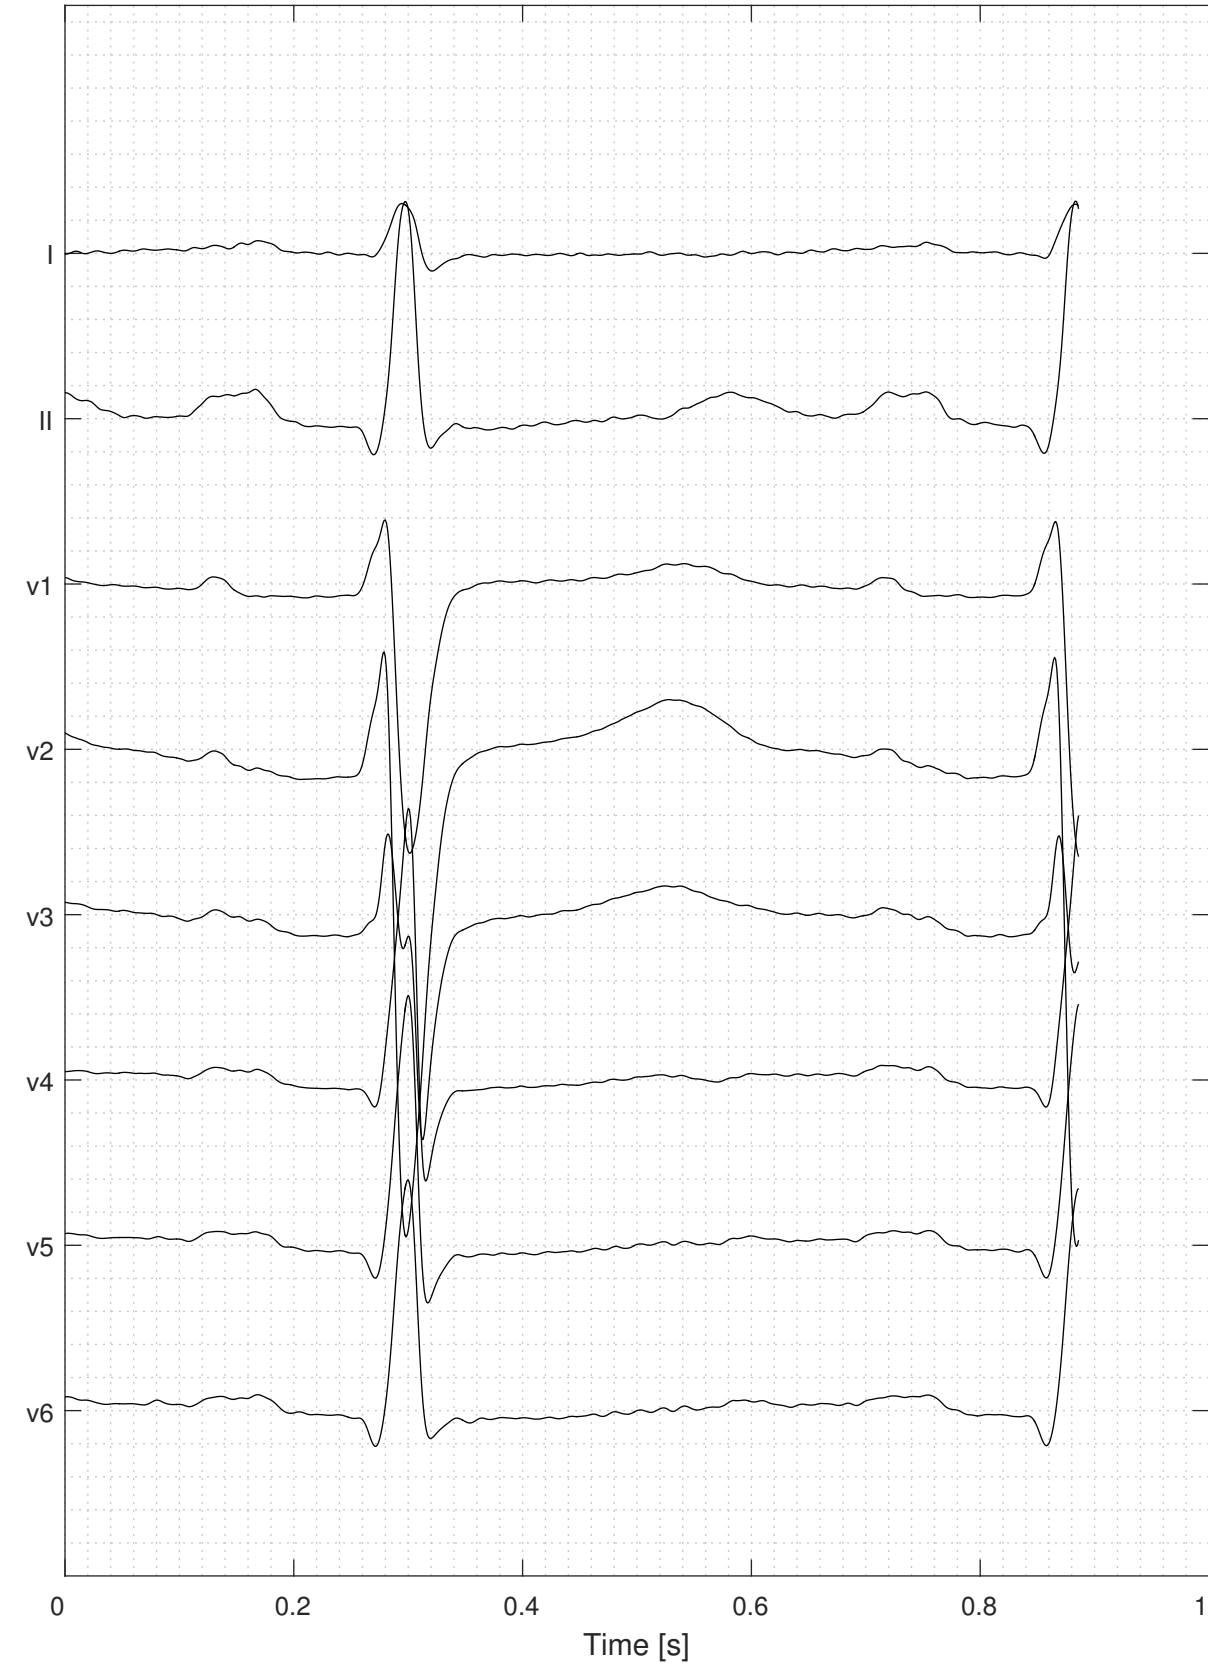

High RR, Complex #: 330

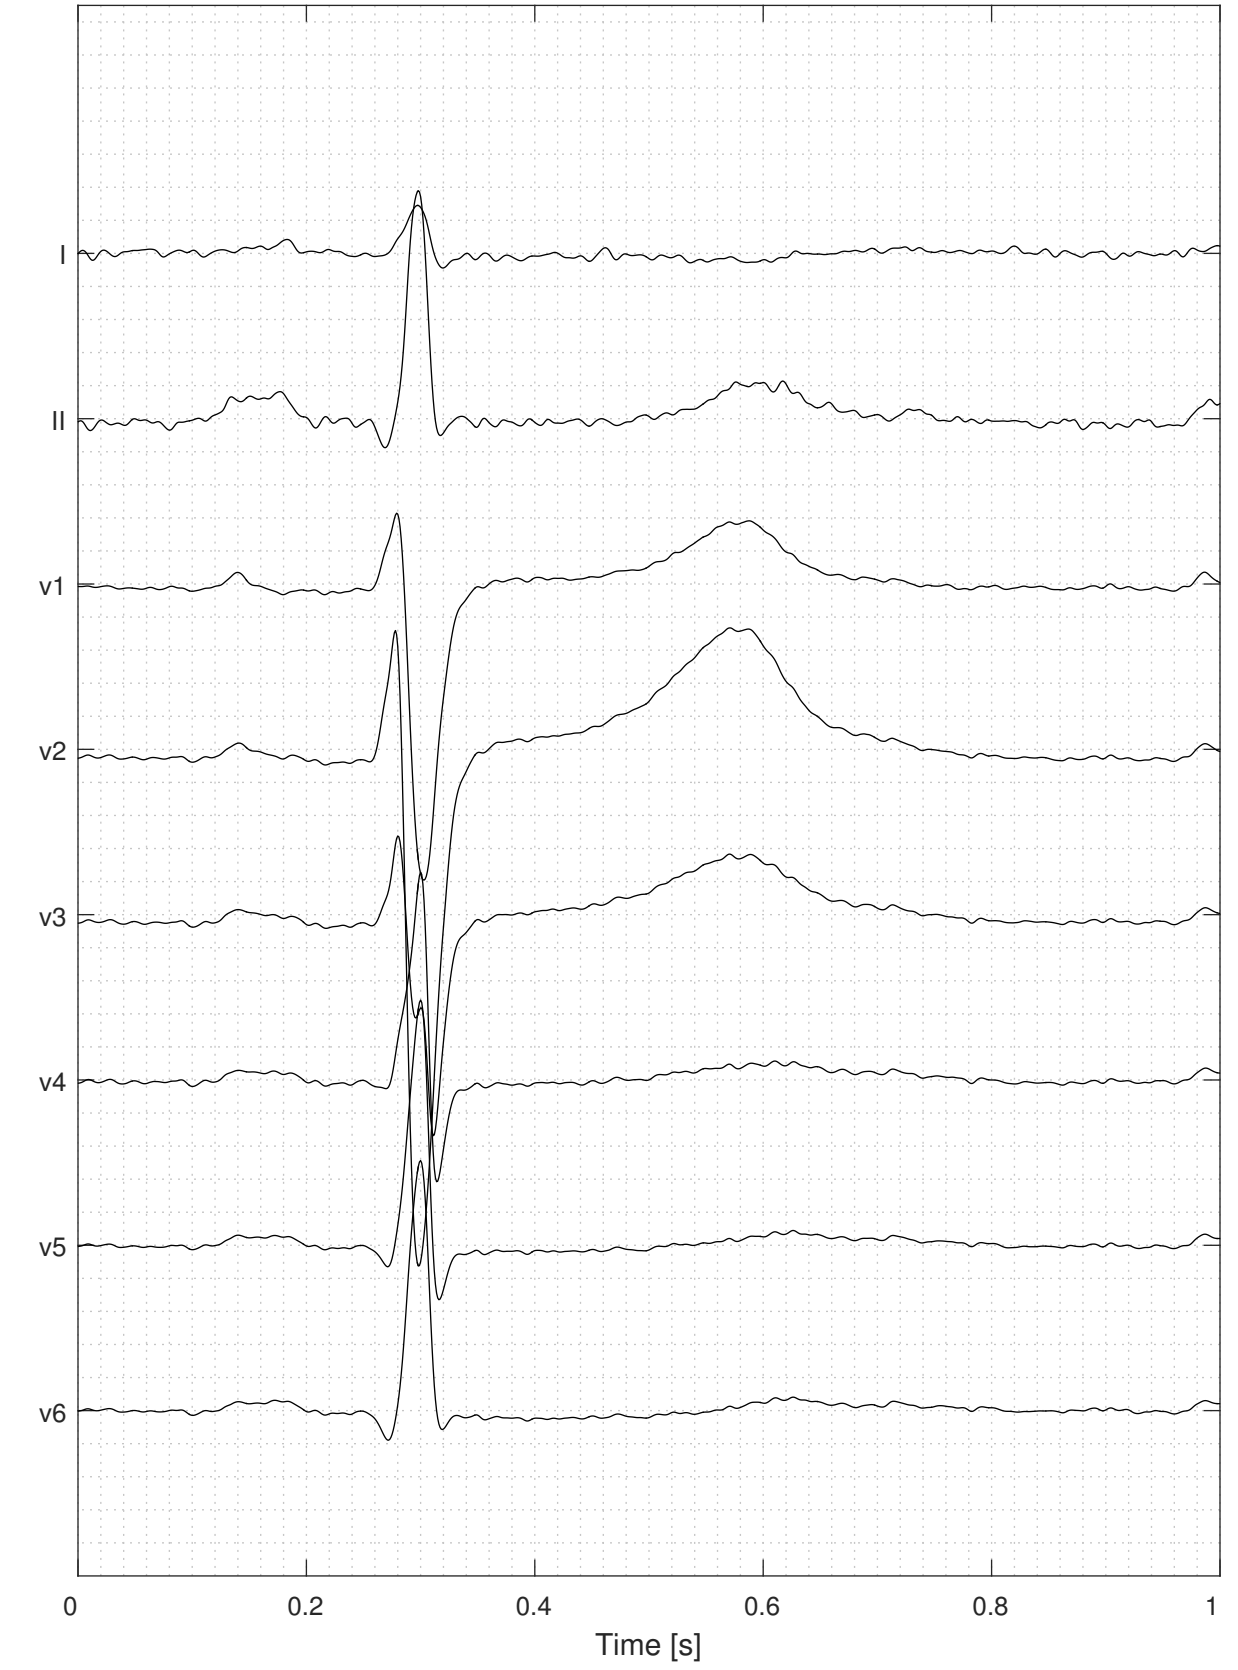

Patient 76

Low RR, Complex #: 265

Mid RR, Complex #: 27

High RR, Complex #: 46

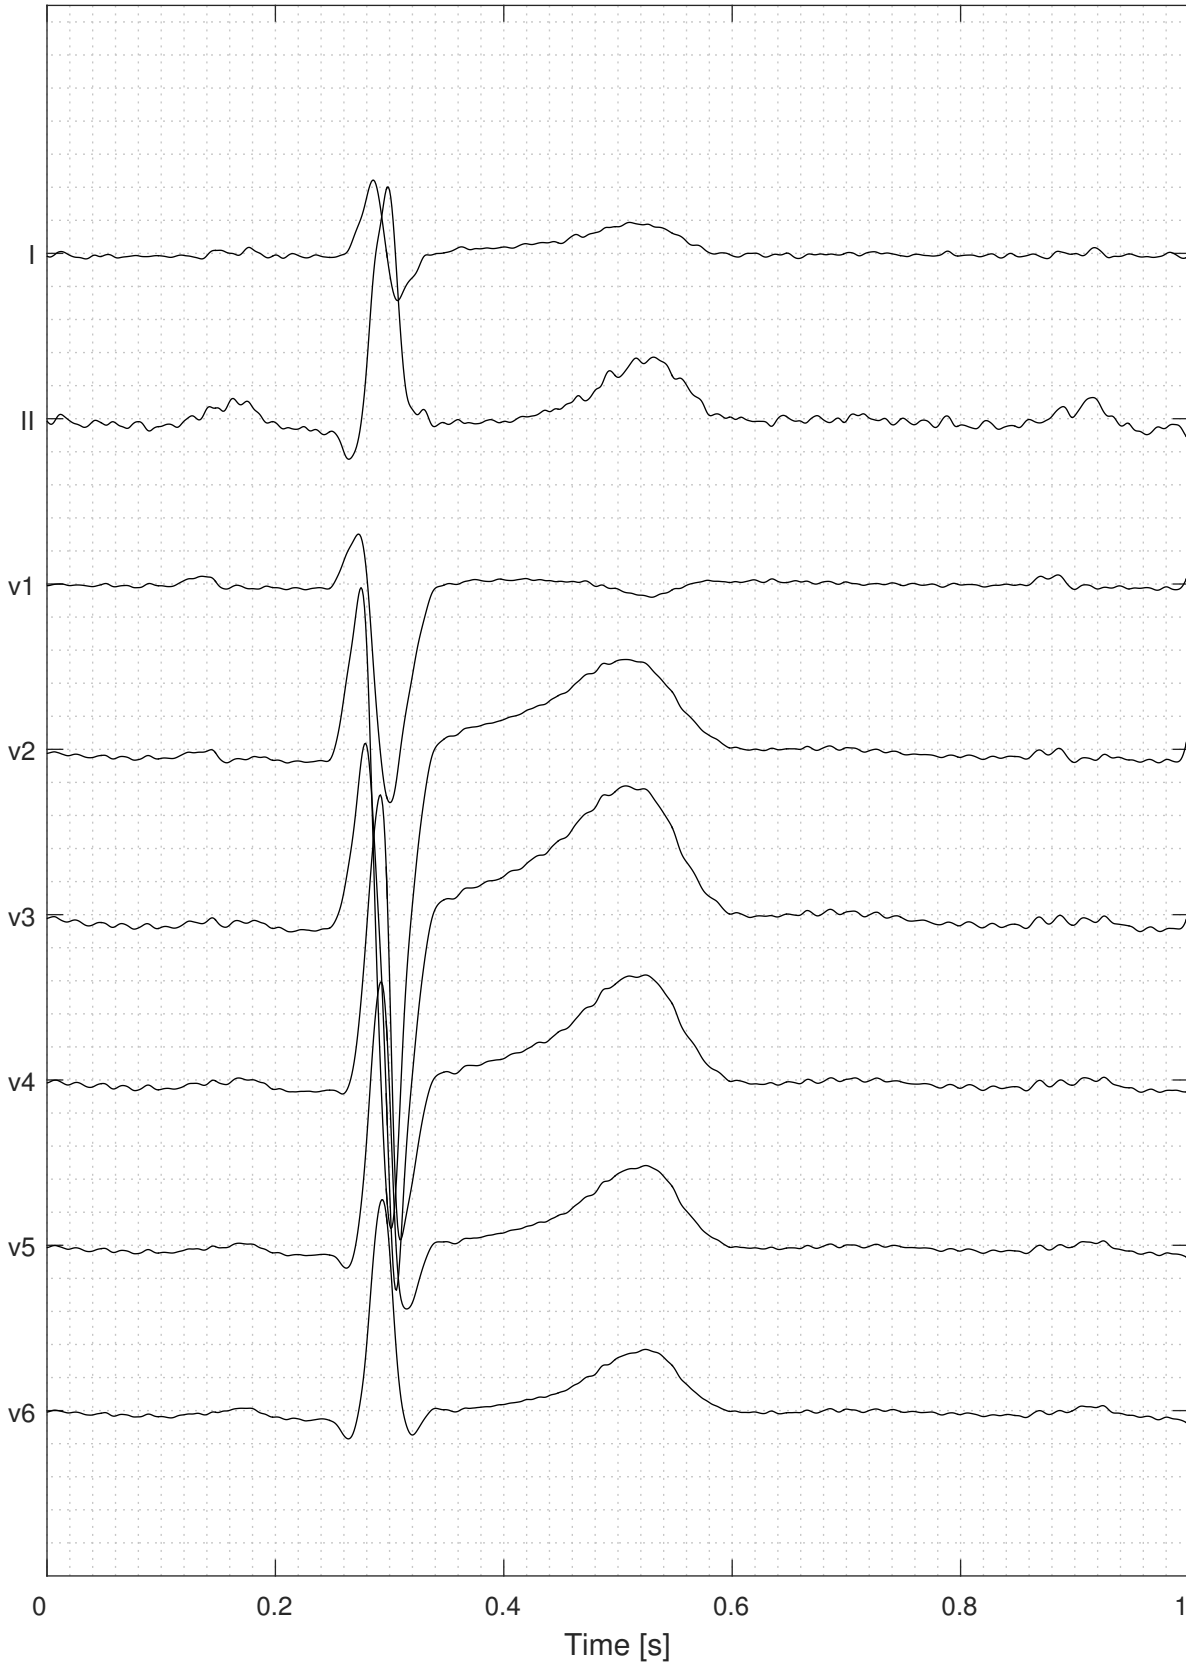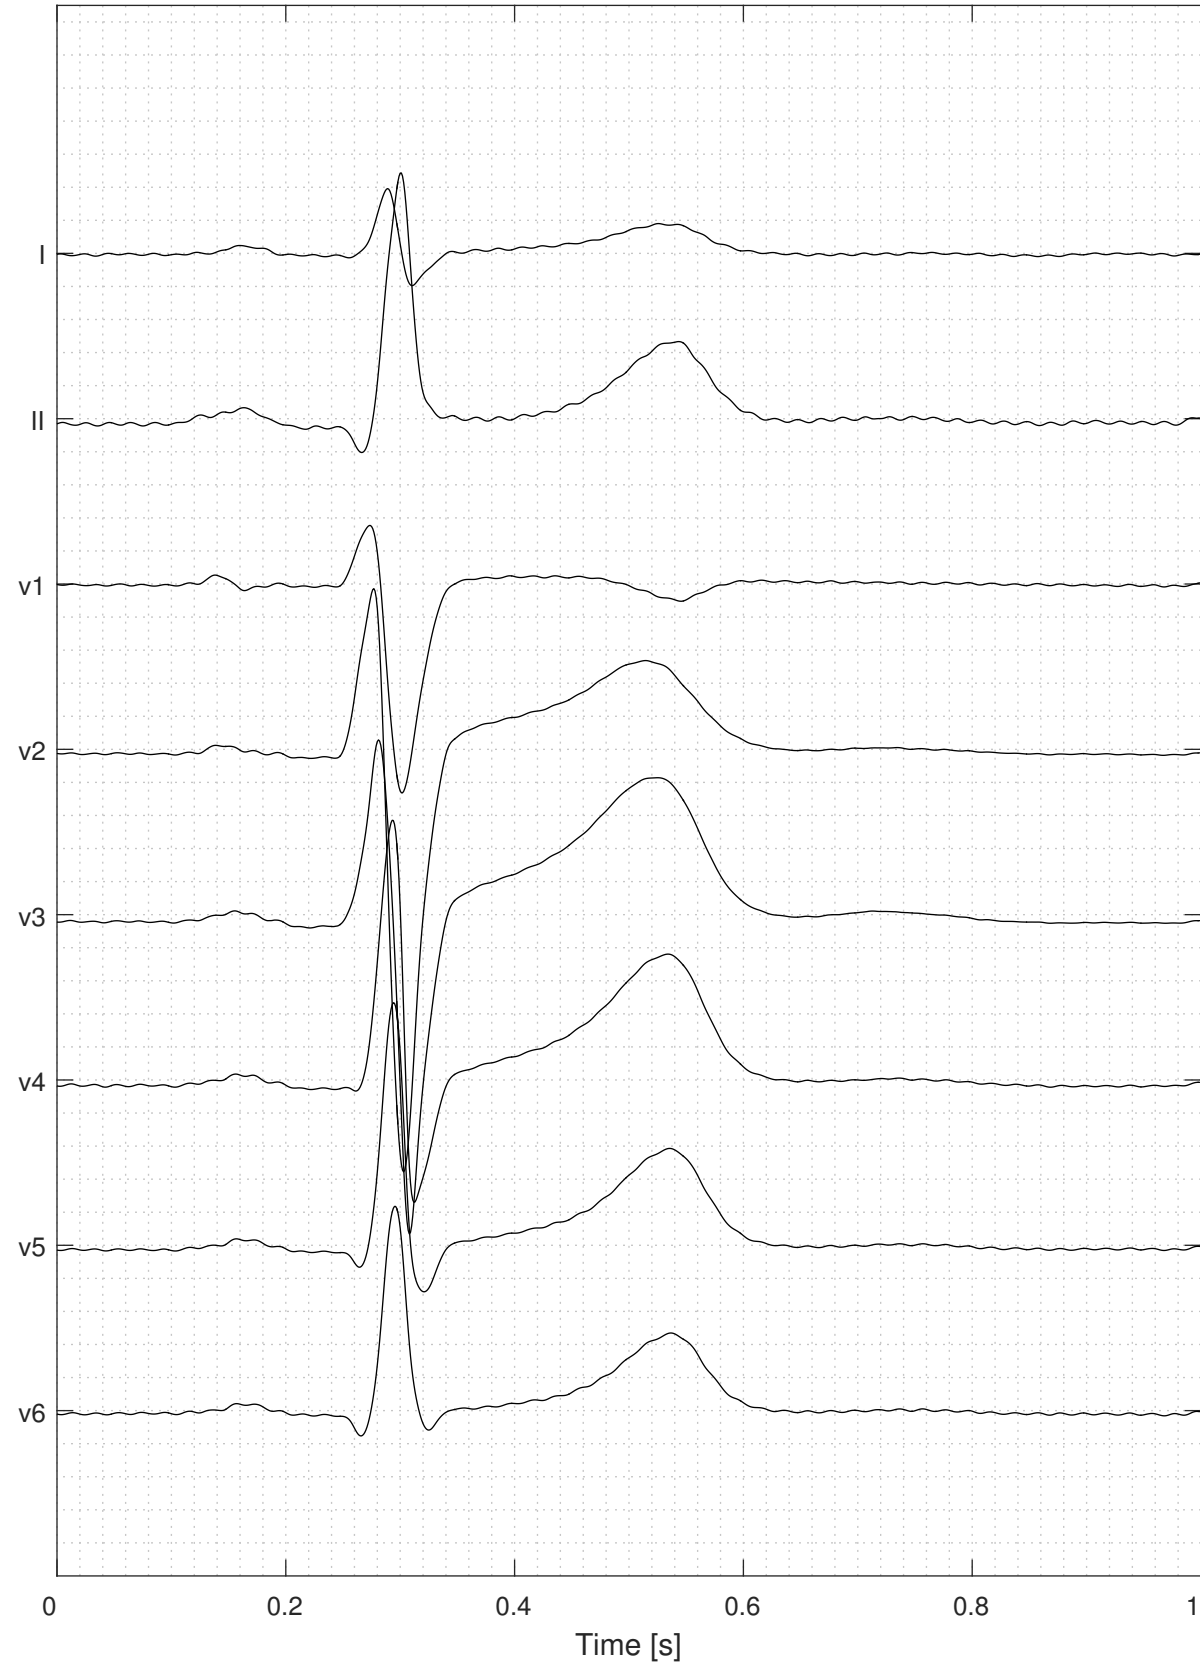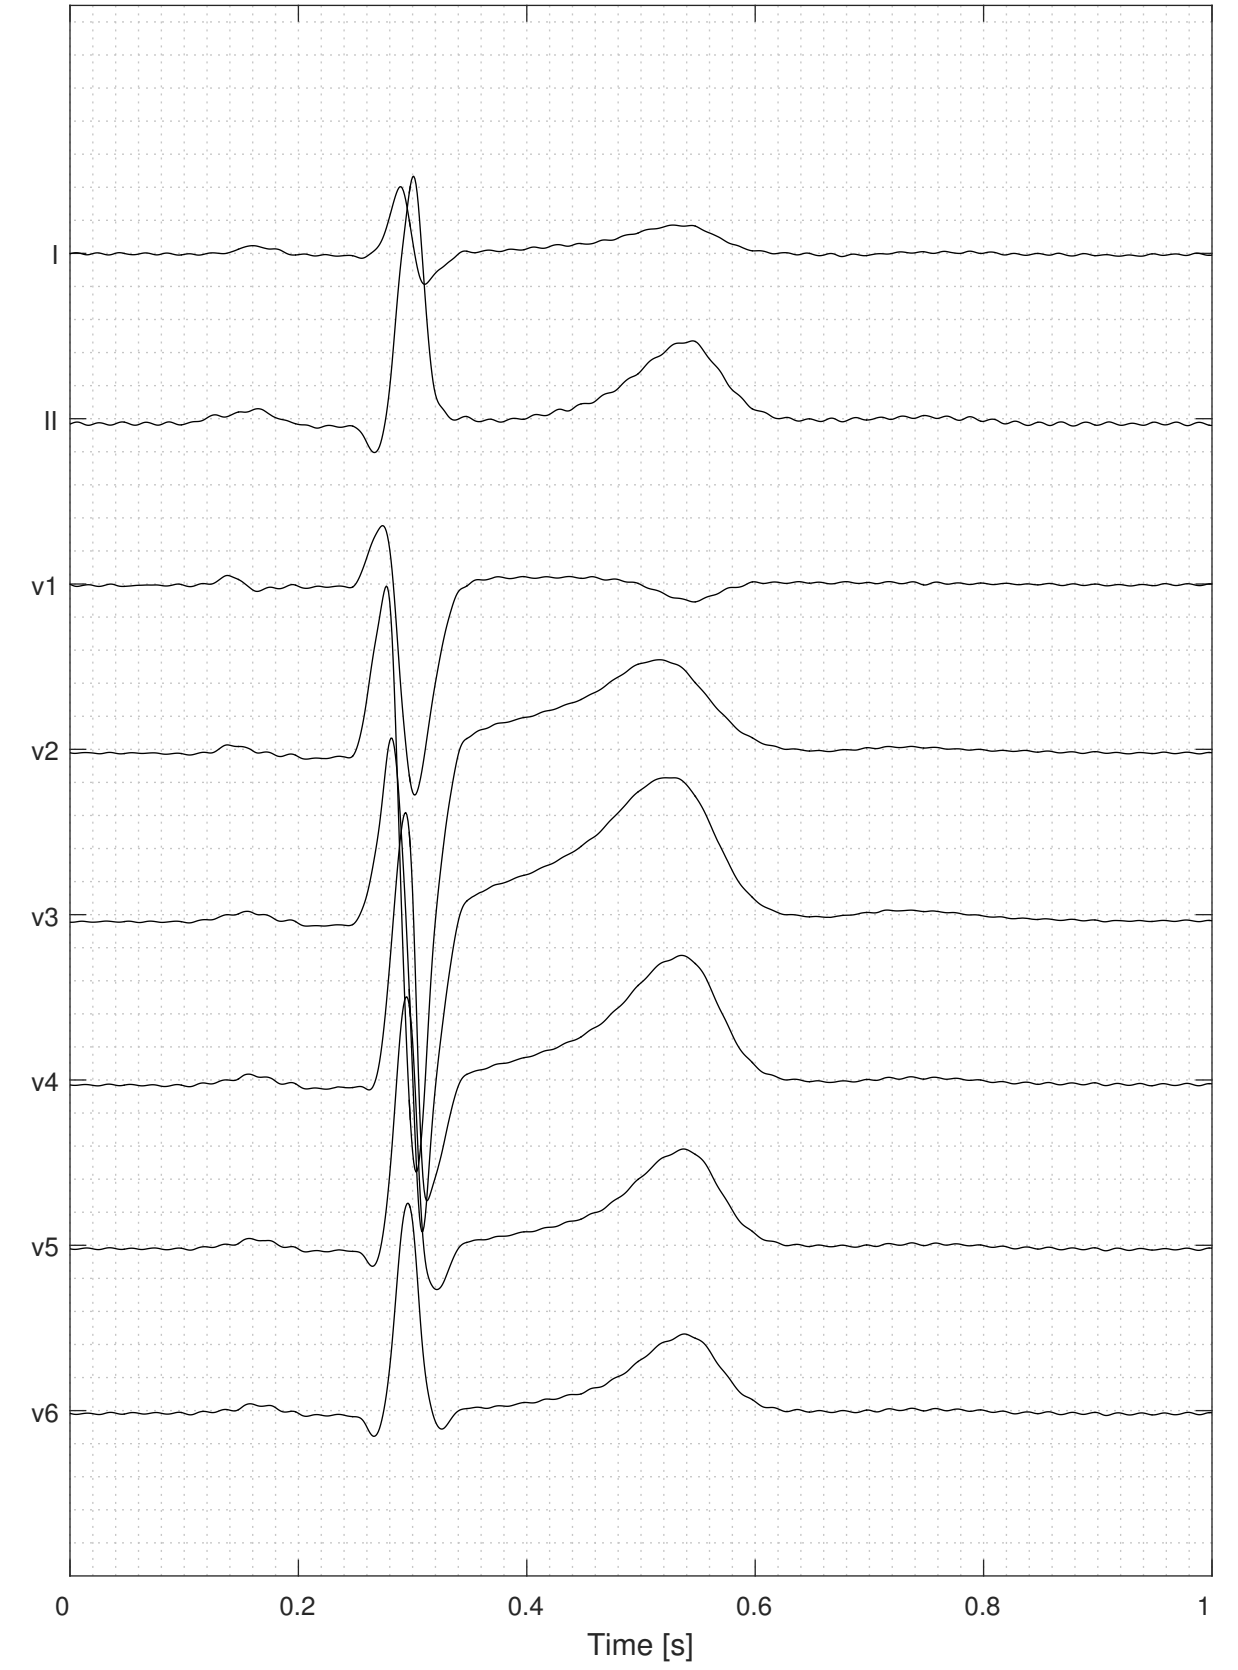

Patient 77

Low RR, Complex #: 309

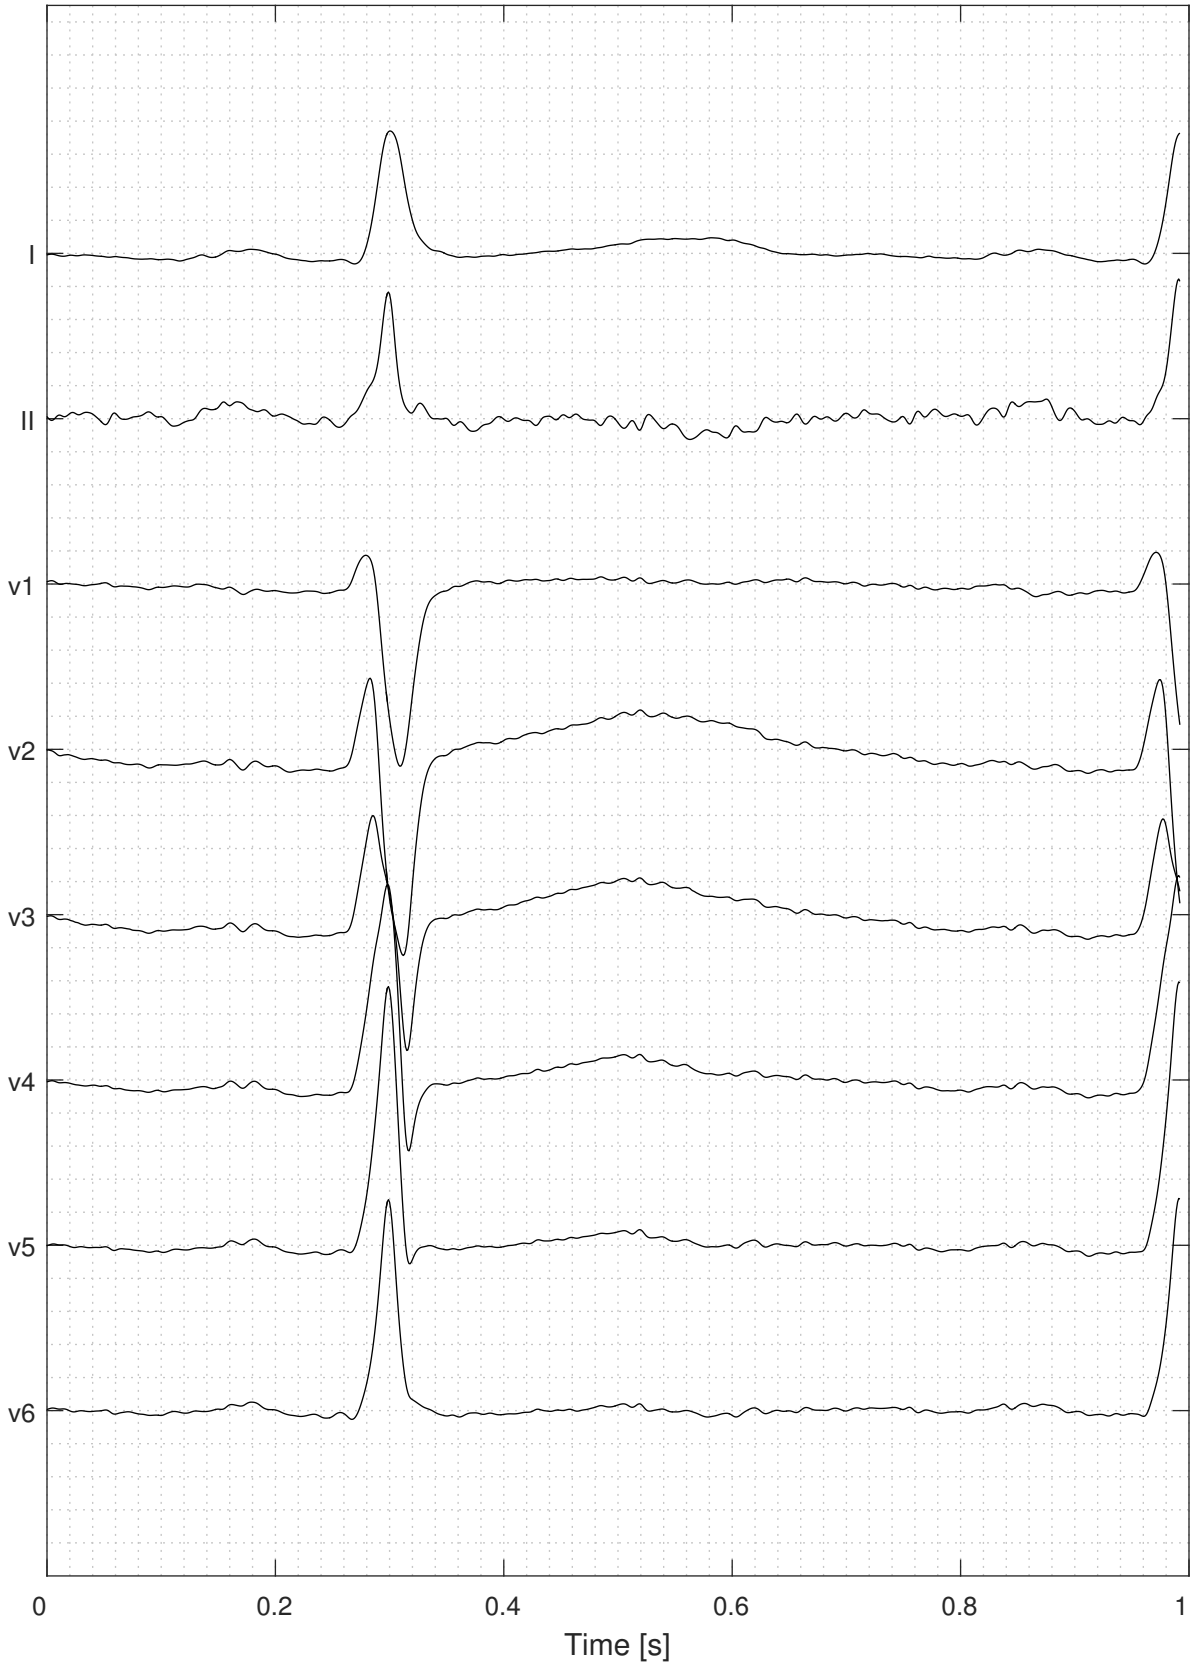

Mid RR, Complex #: 228

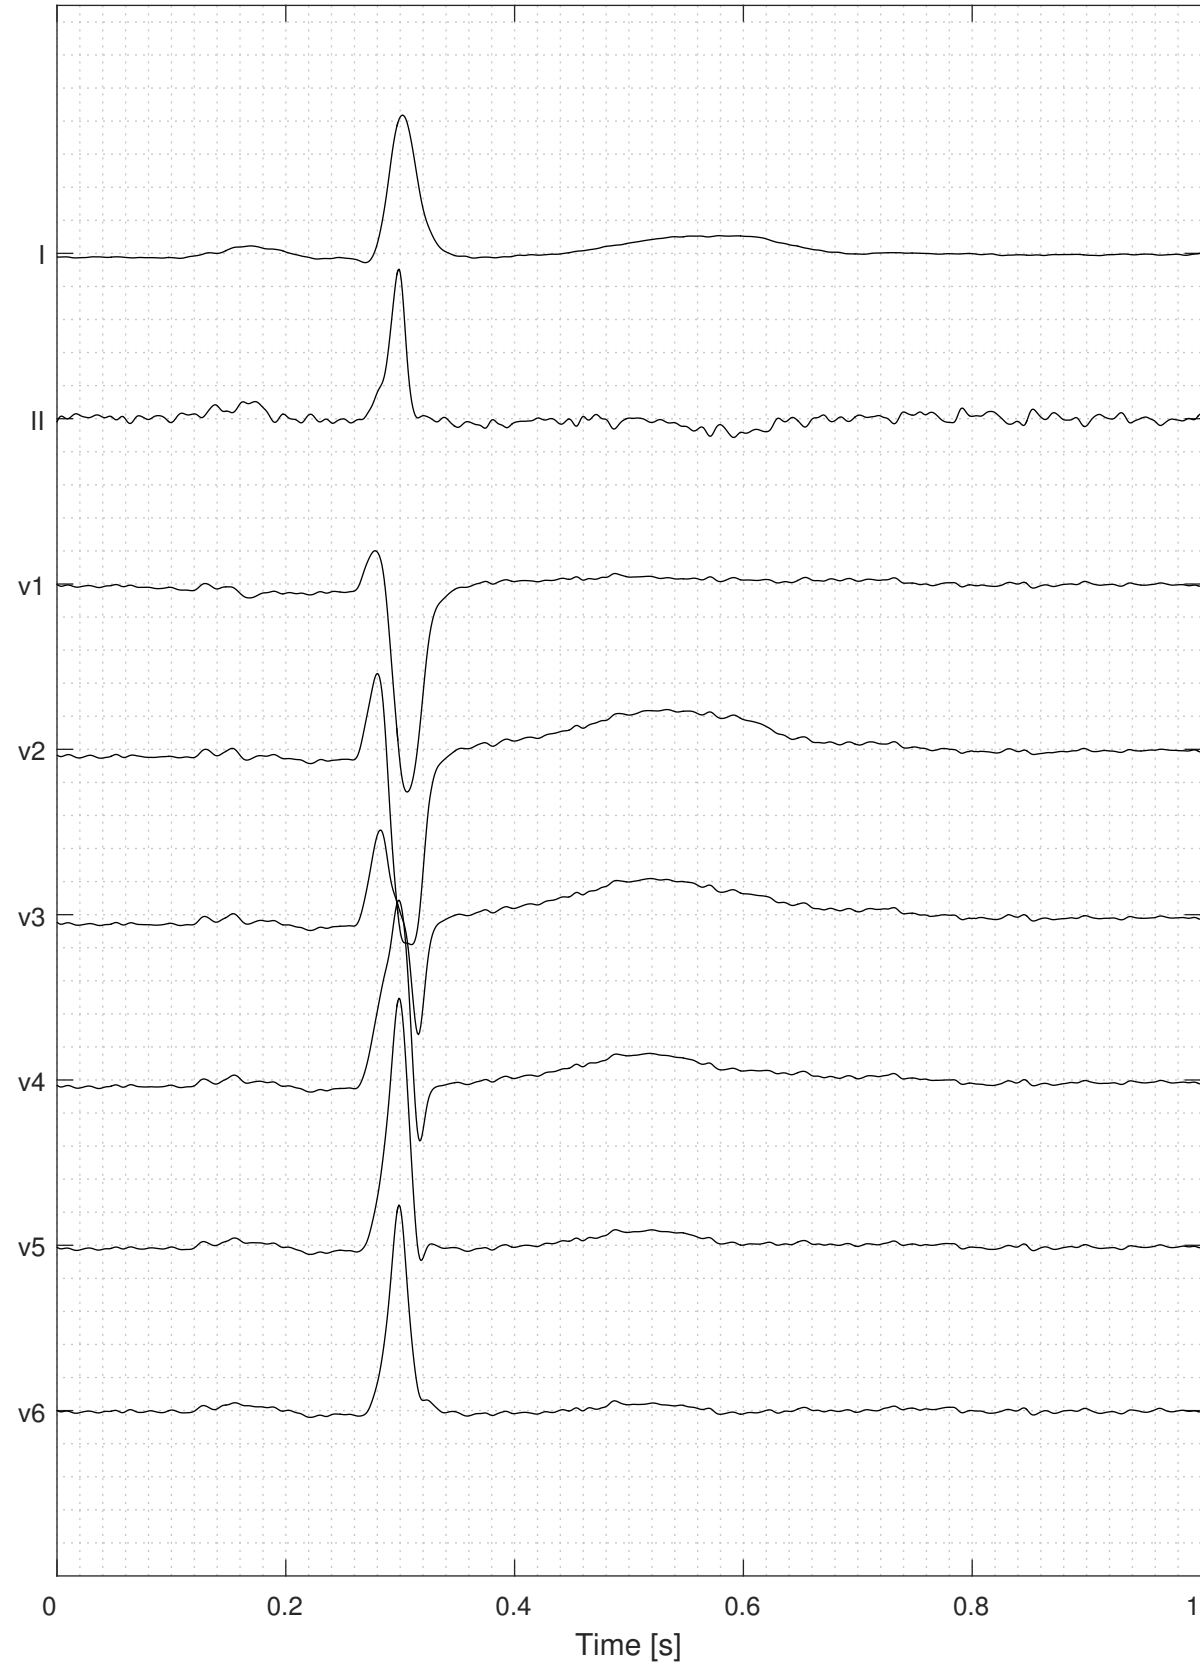

High RR, Complex #: 35

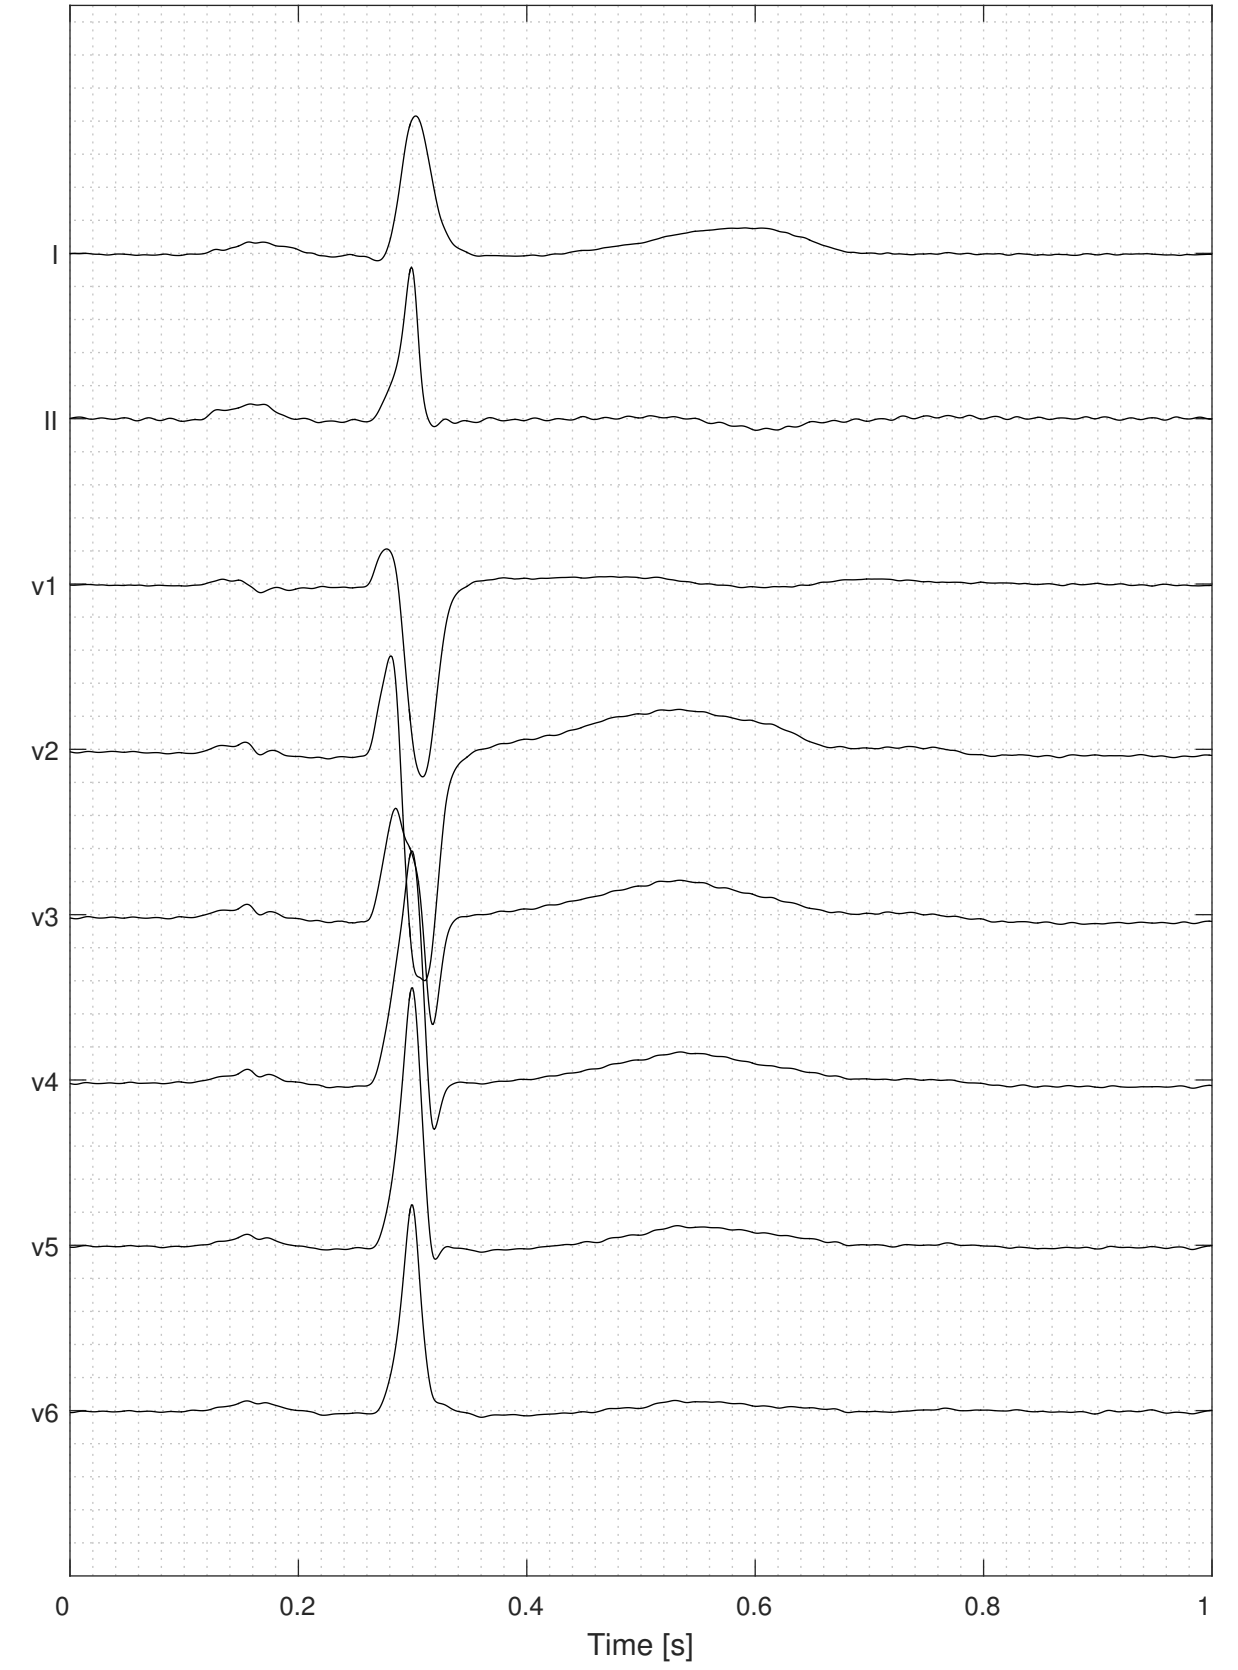

Patient 78

Low RR, Complex #: 167

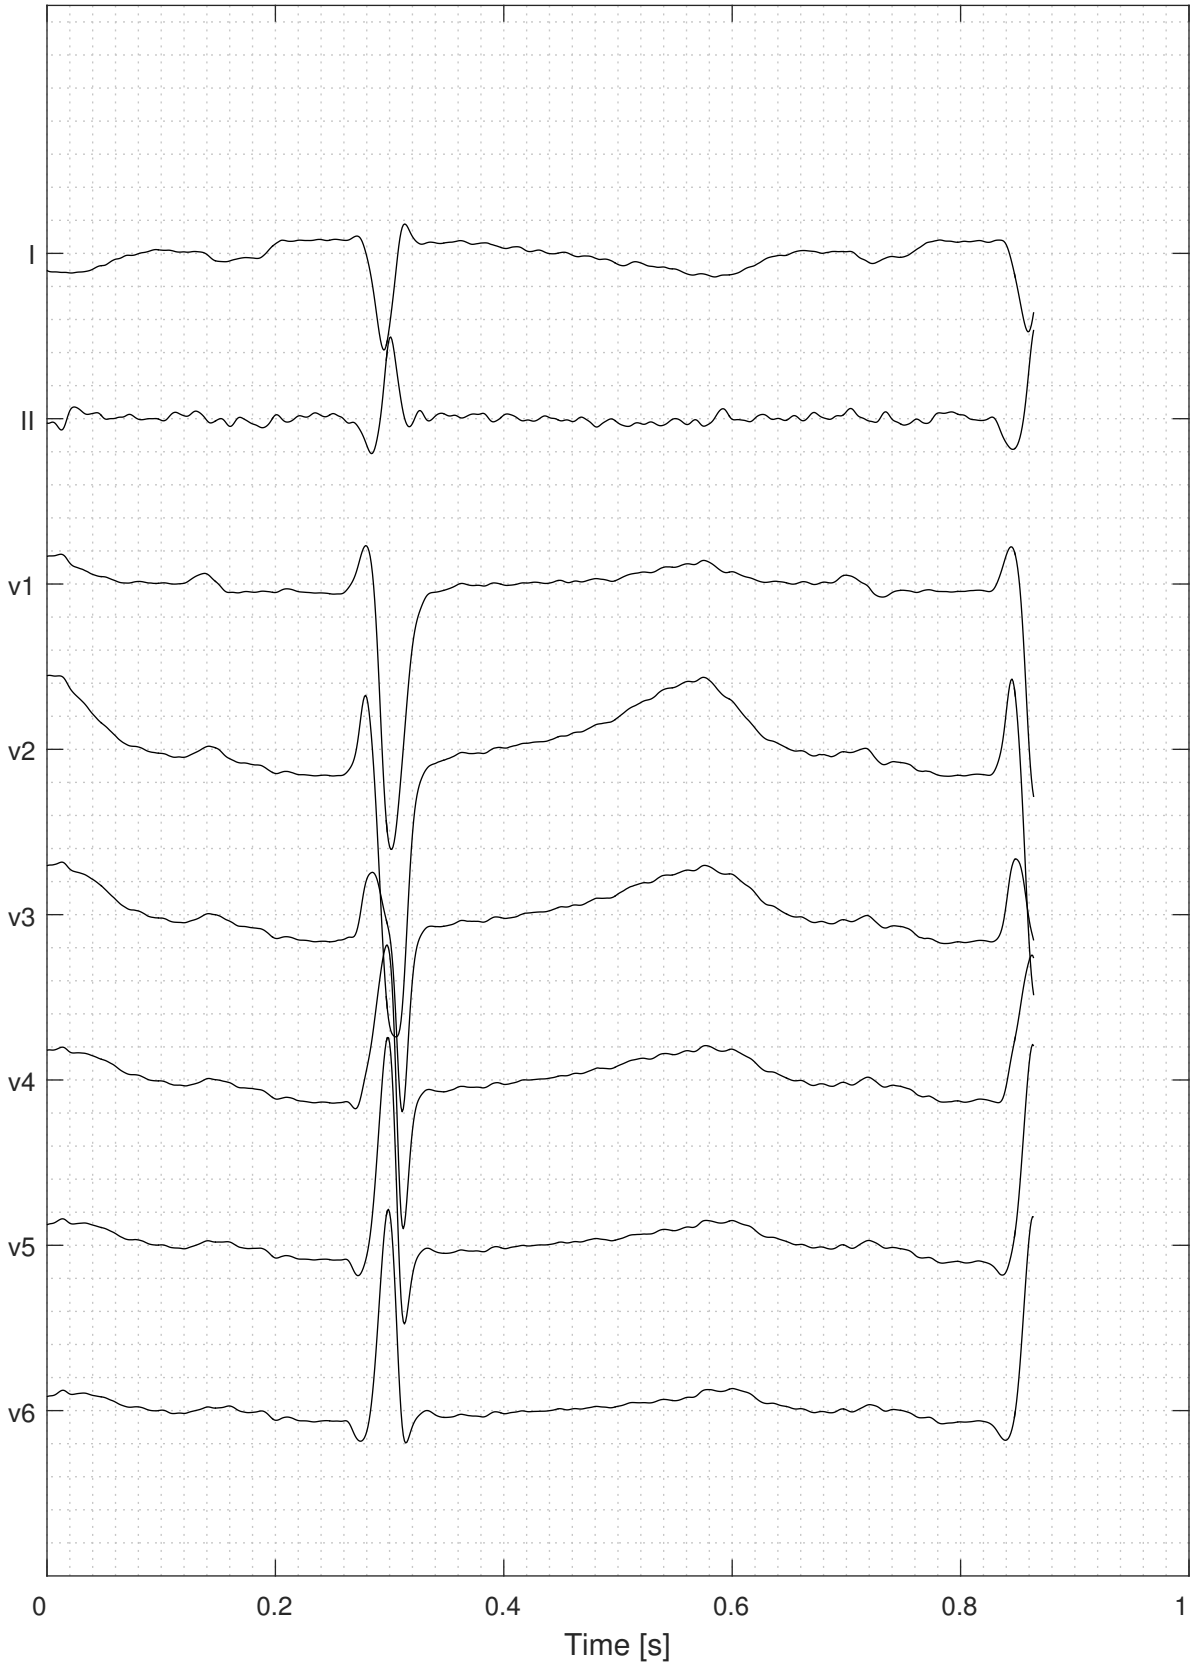

Mid RR, Complex #: 67

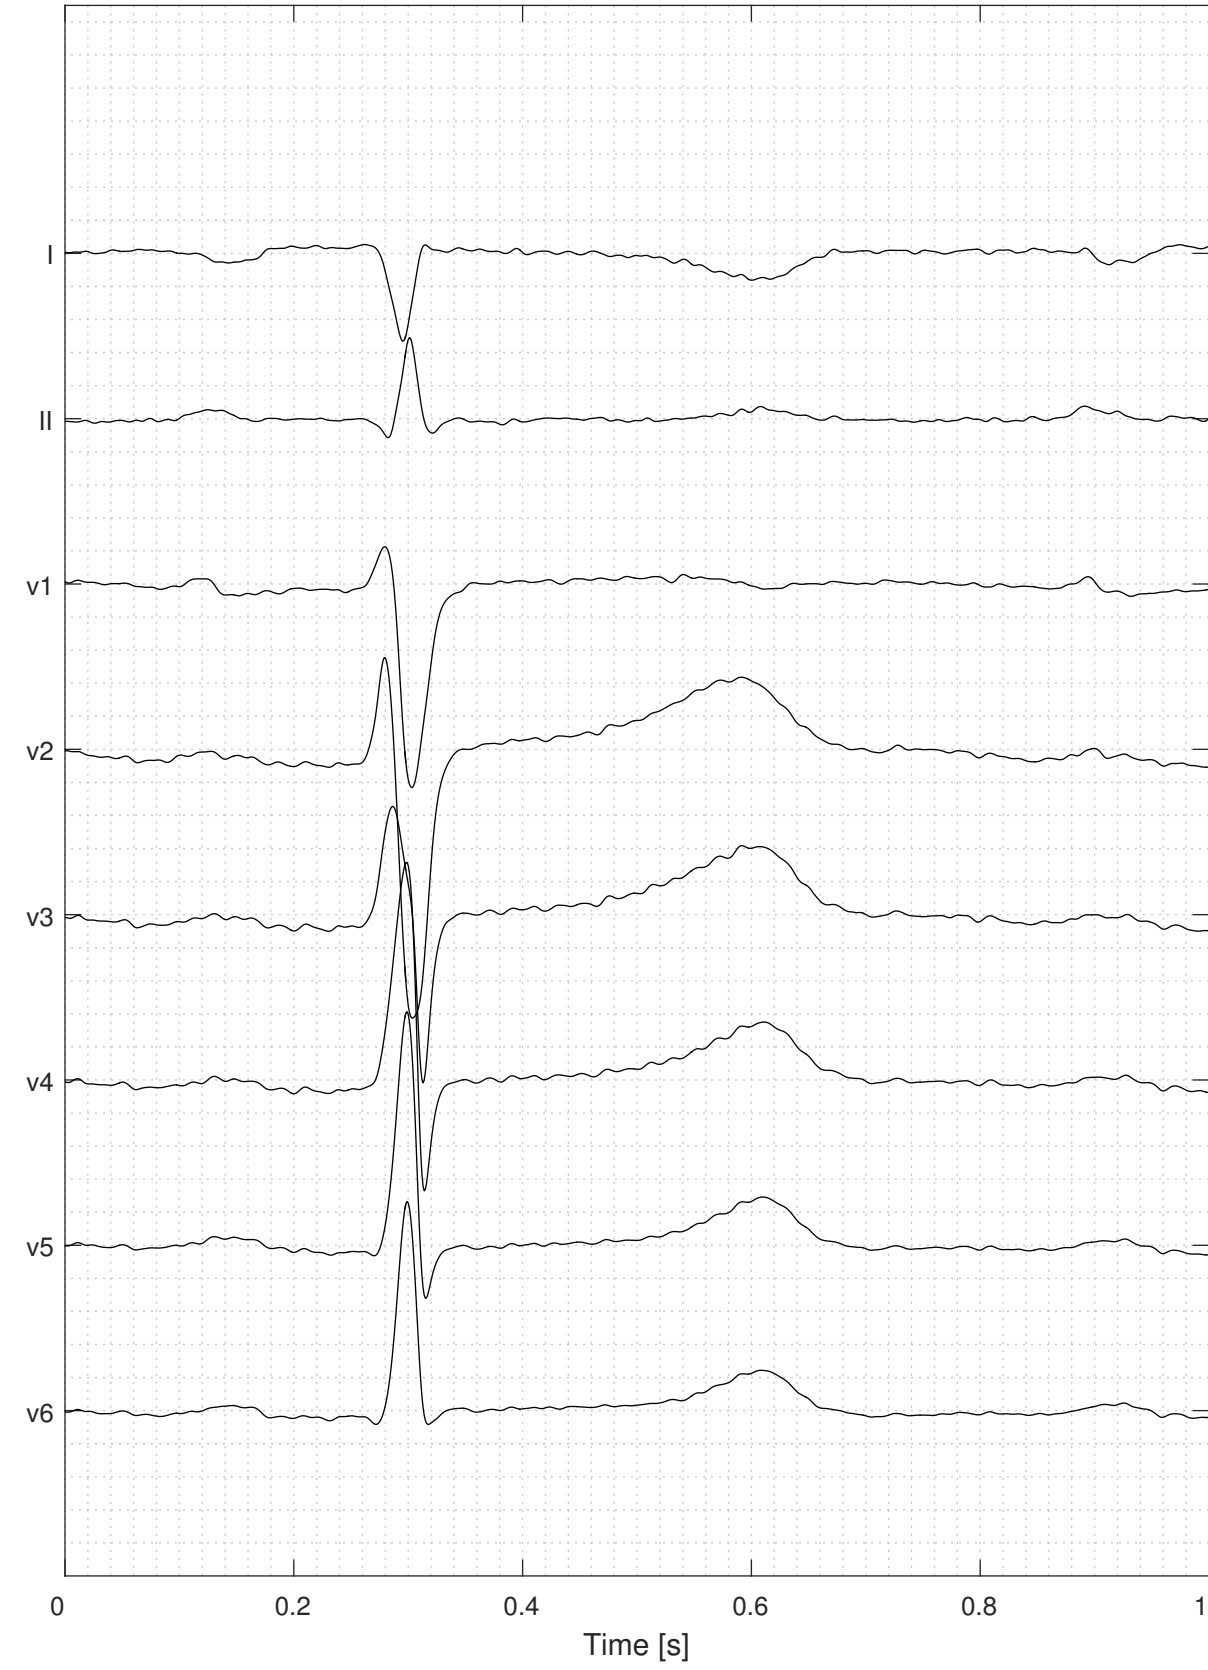

High RR, Complex #: 2

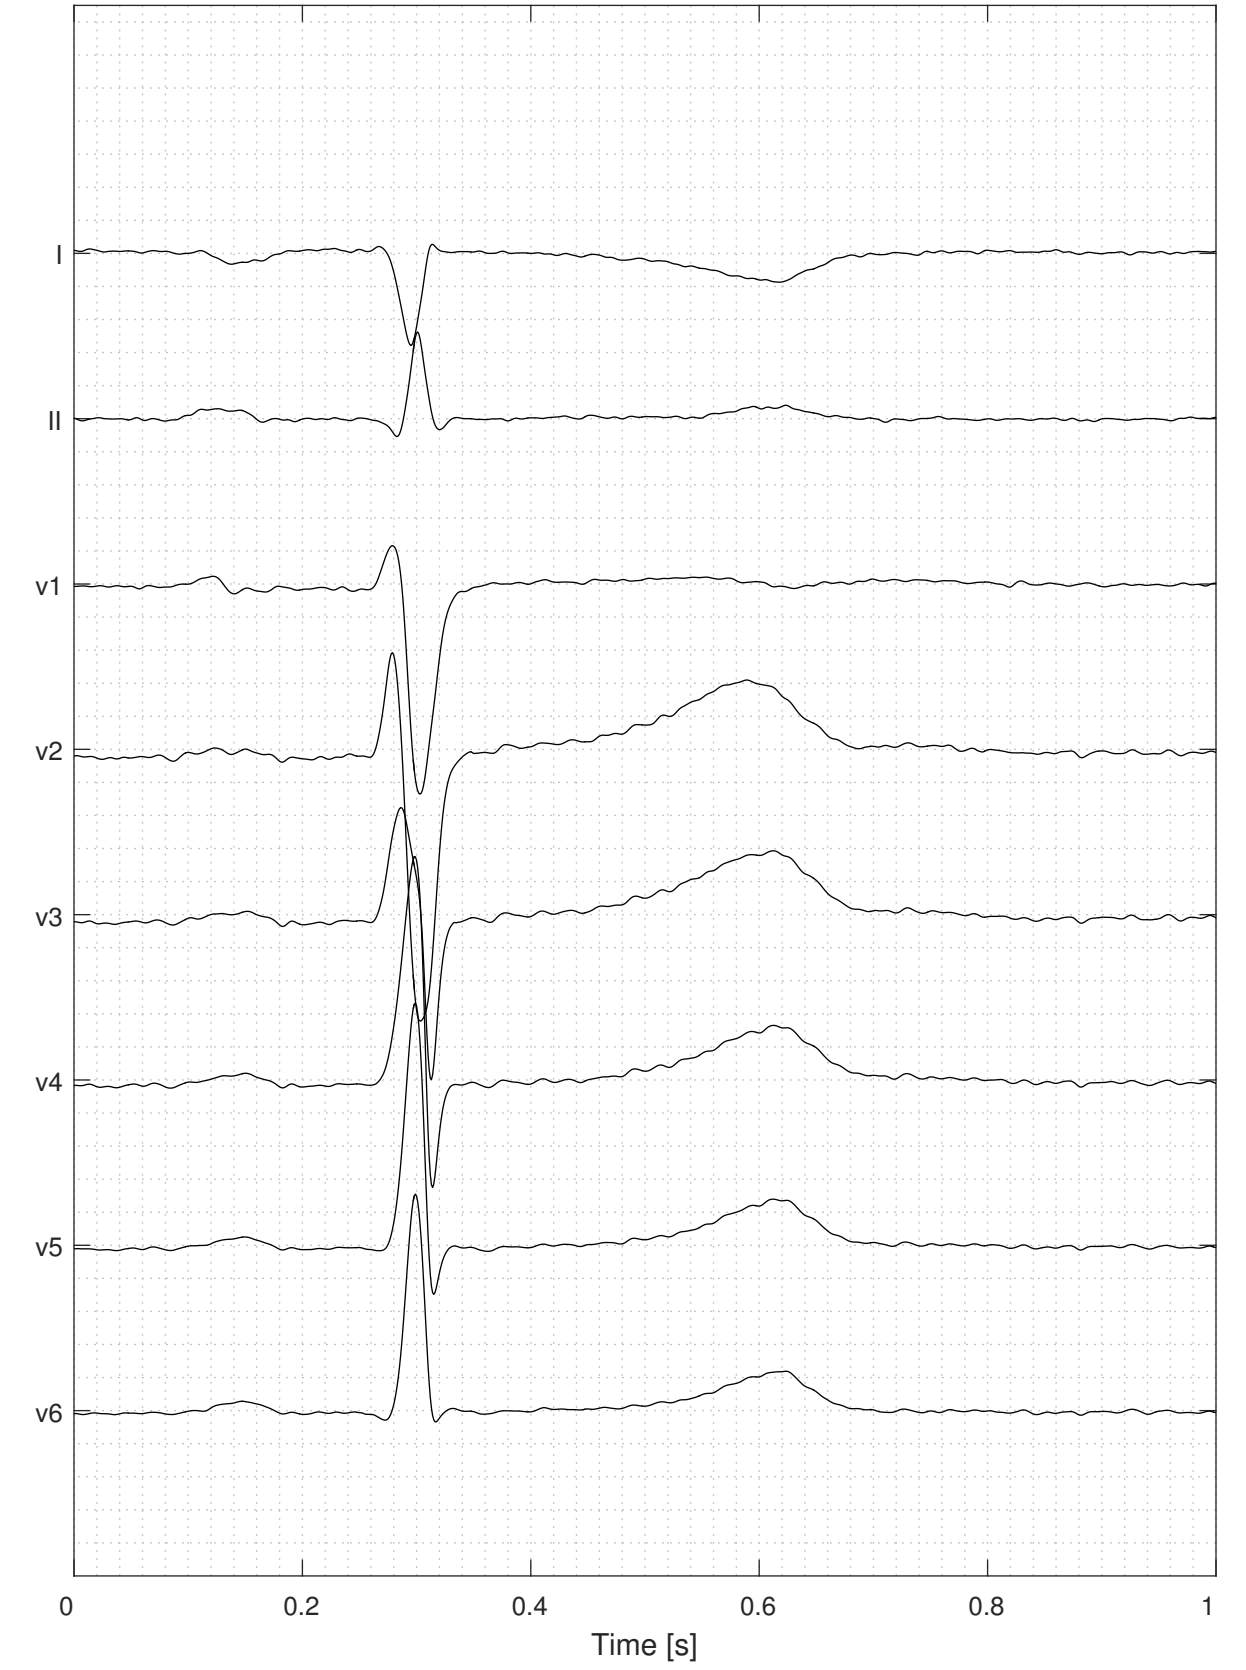

Patient 79

Low RR, Complex #: 137

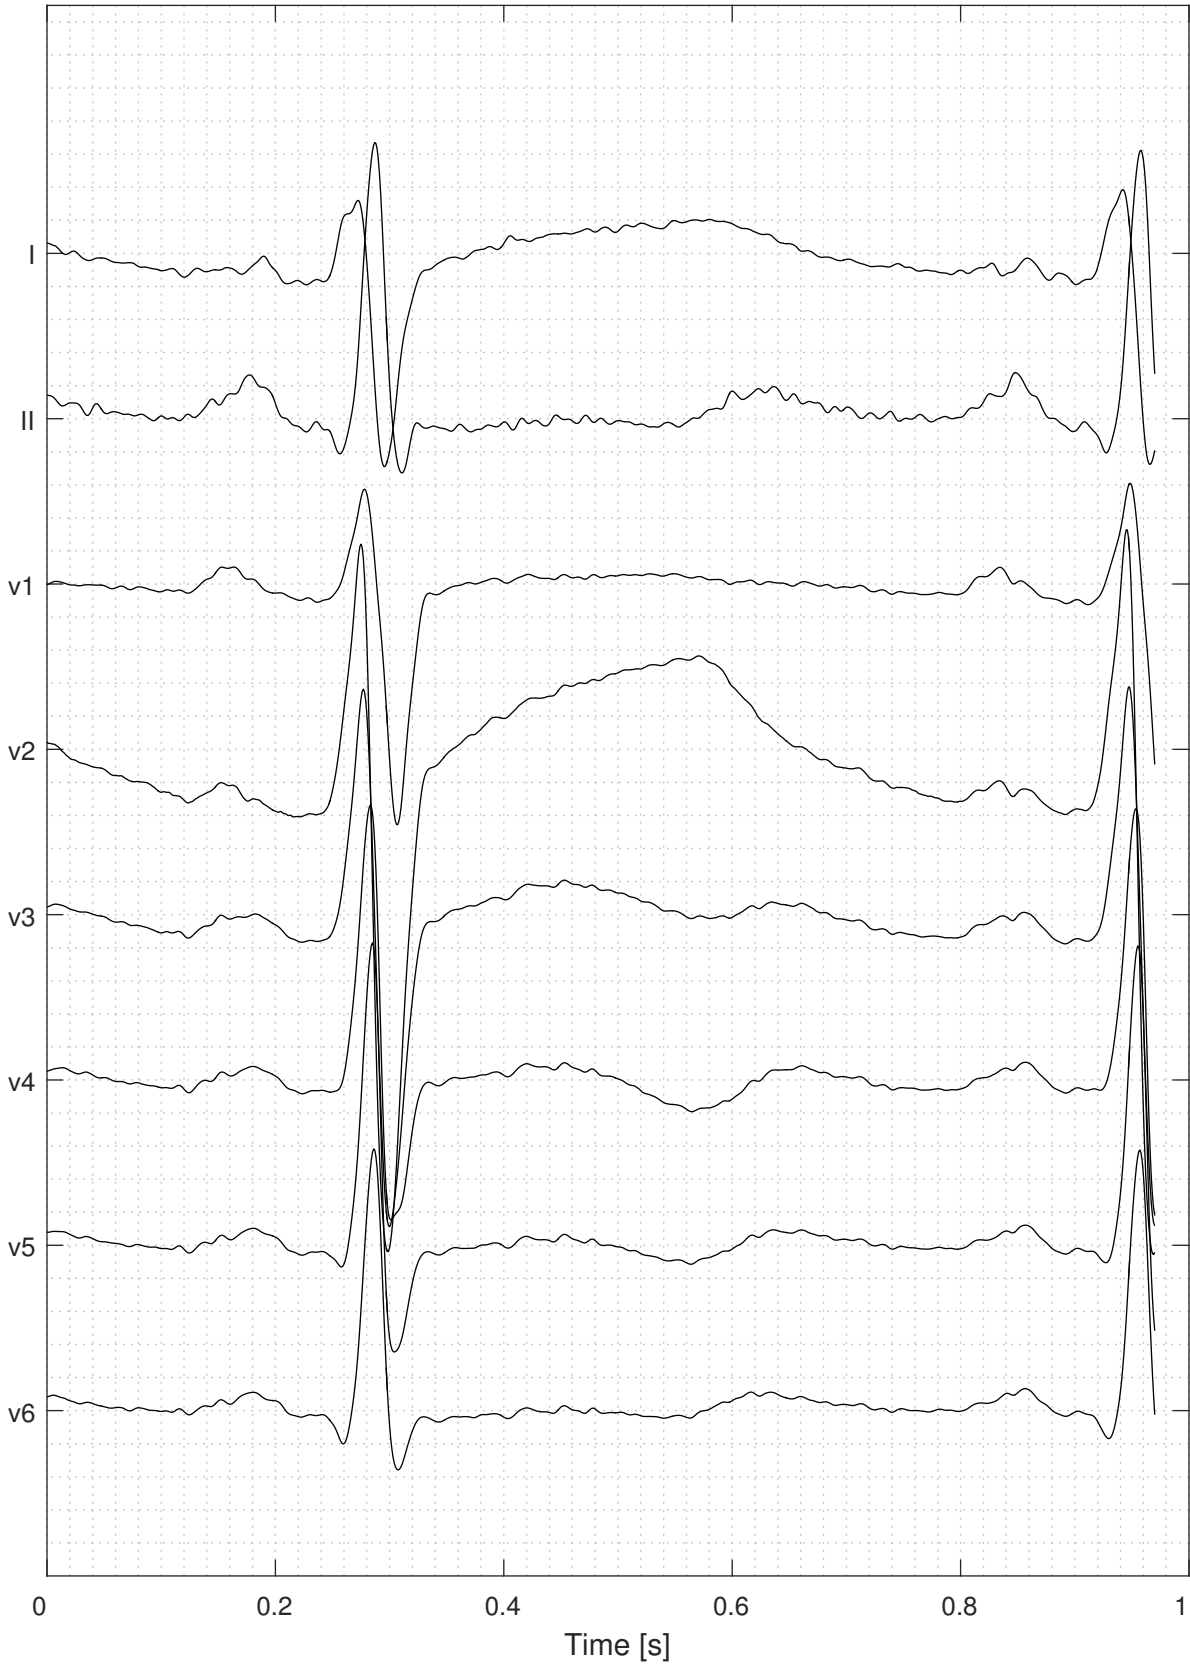

Mid RR, Complex #: 269

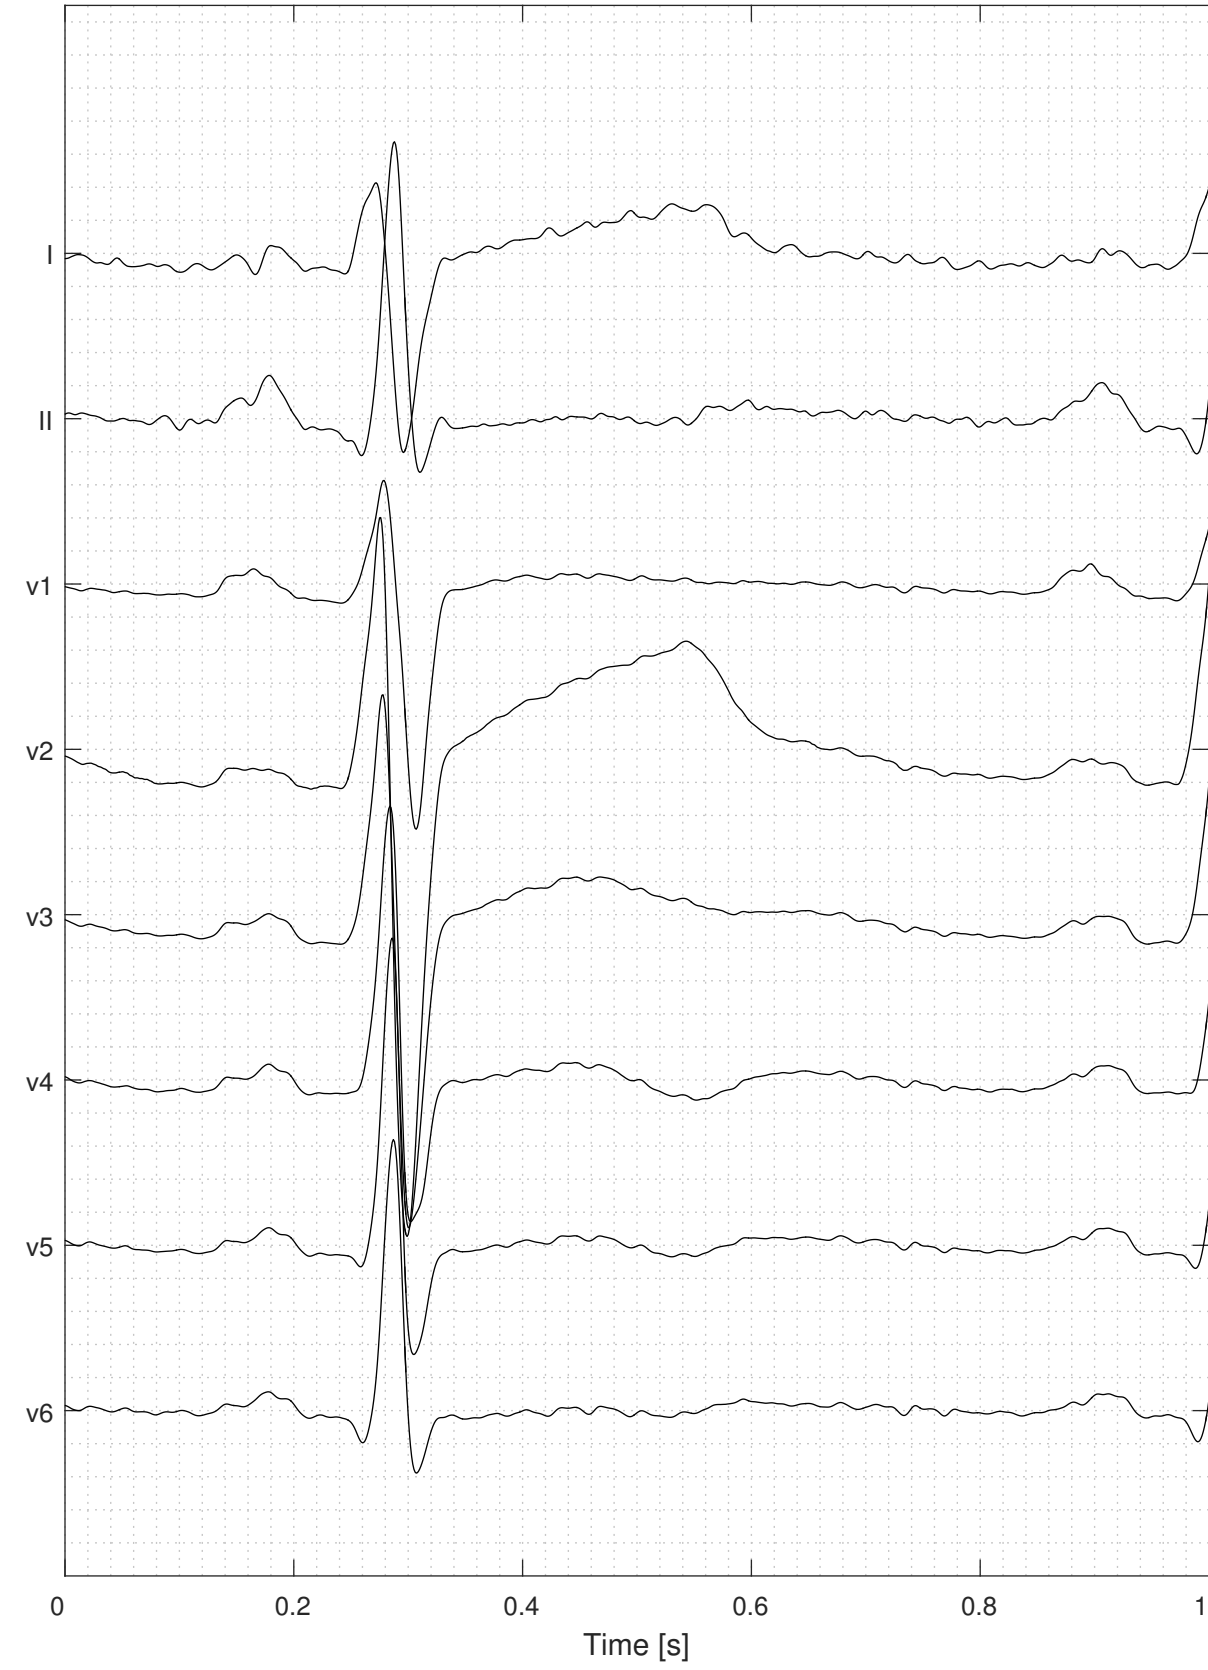

High RR, Complex #: 60

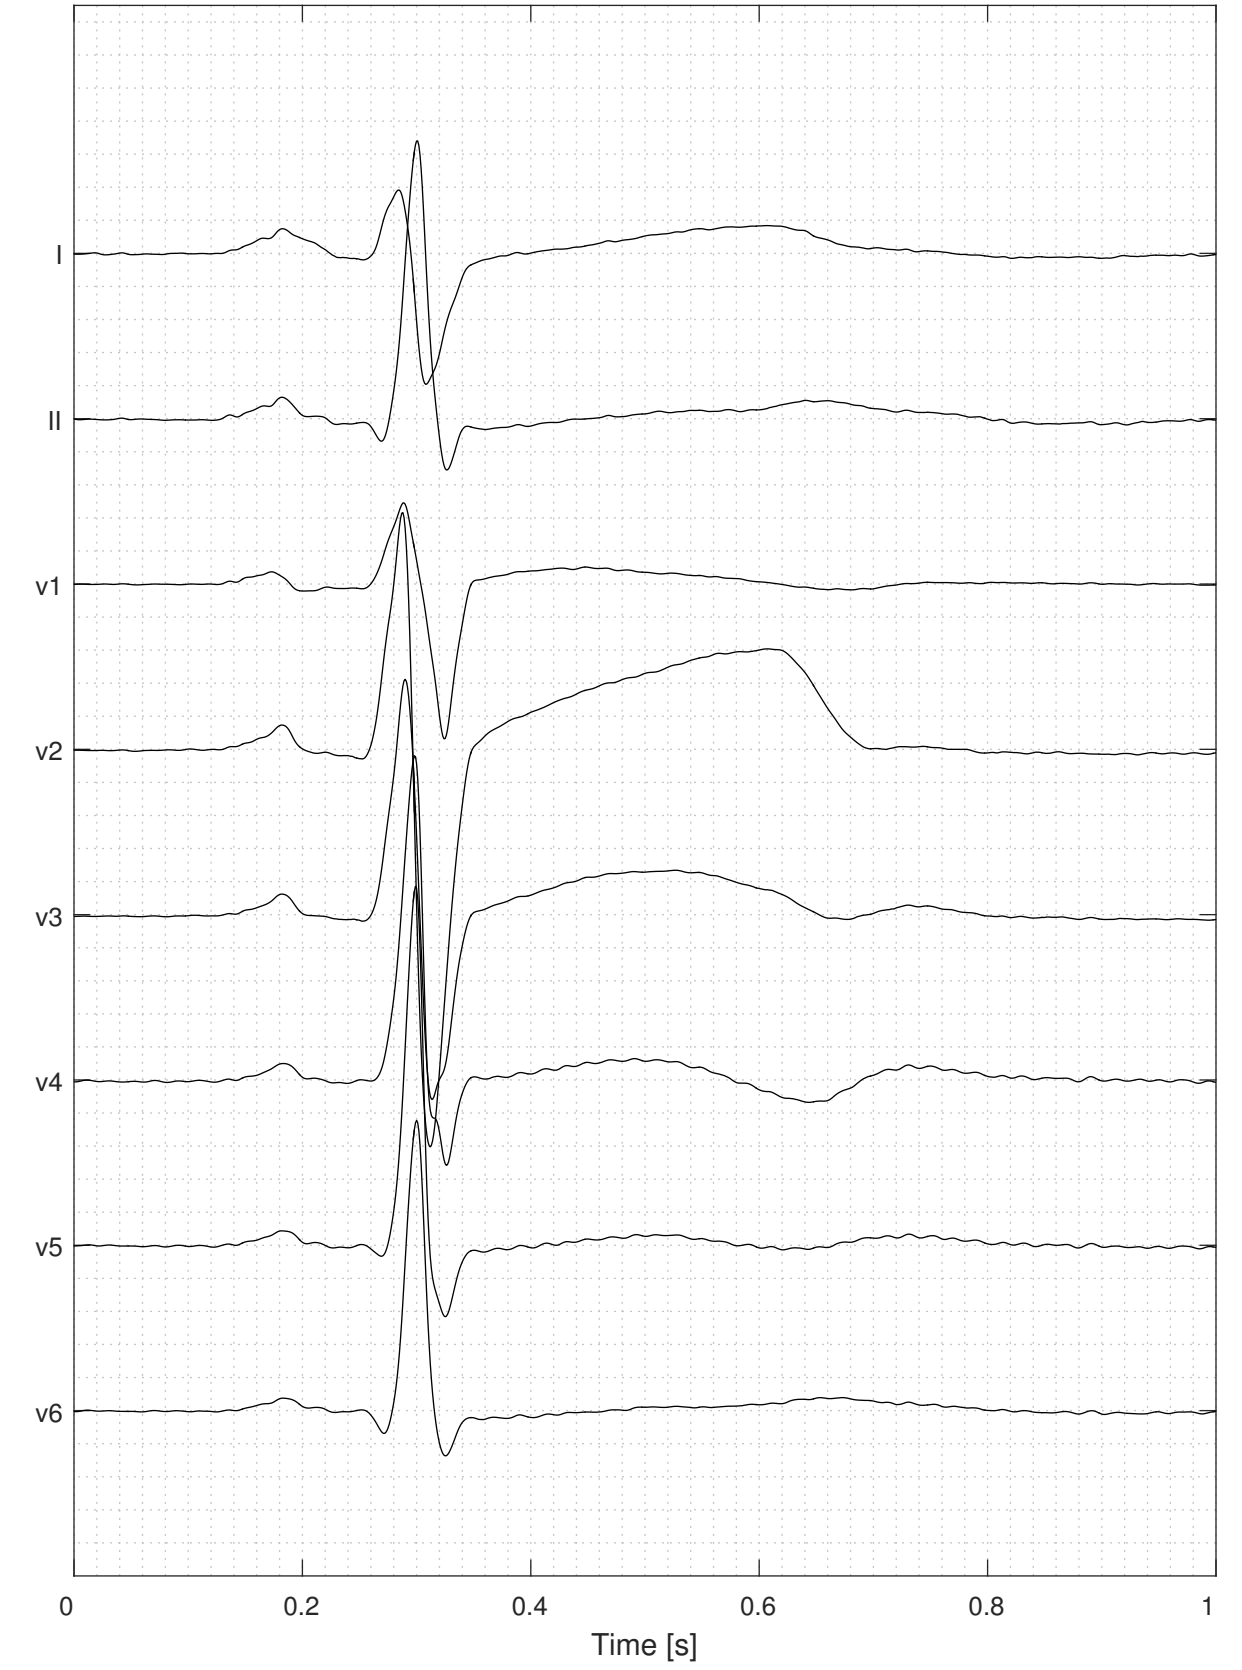

Patient 80

Low RR, Complex #: 117

Mid RR, Complex #: 25

High RR, Complex #: 81

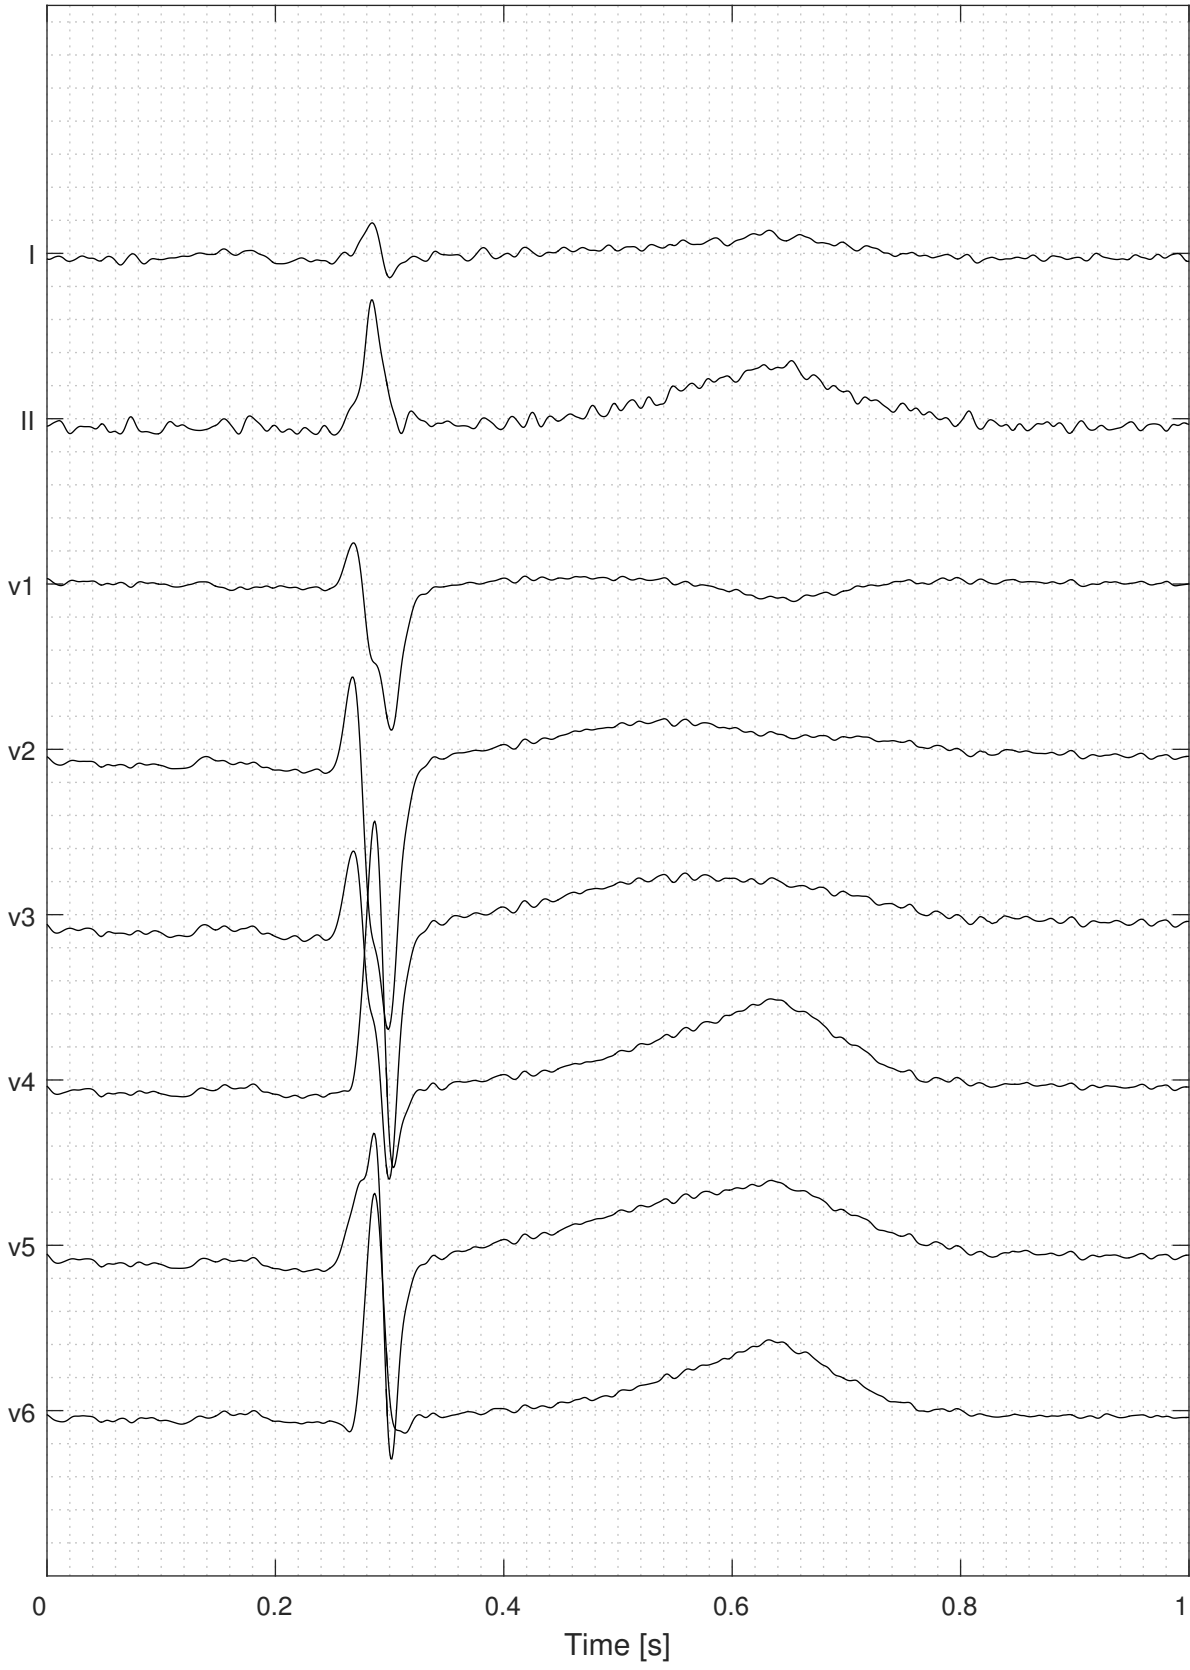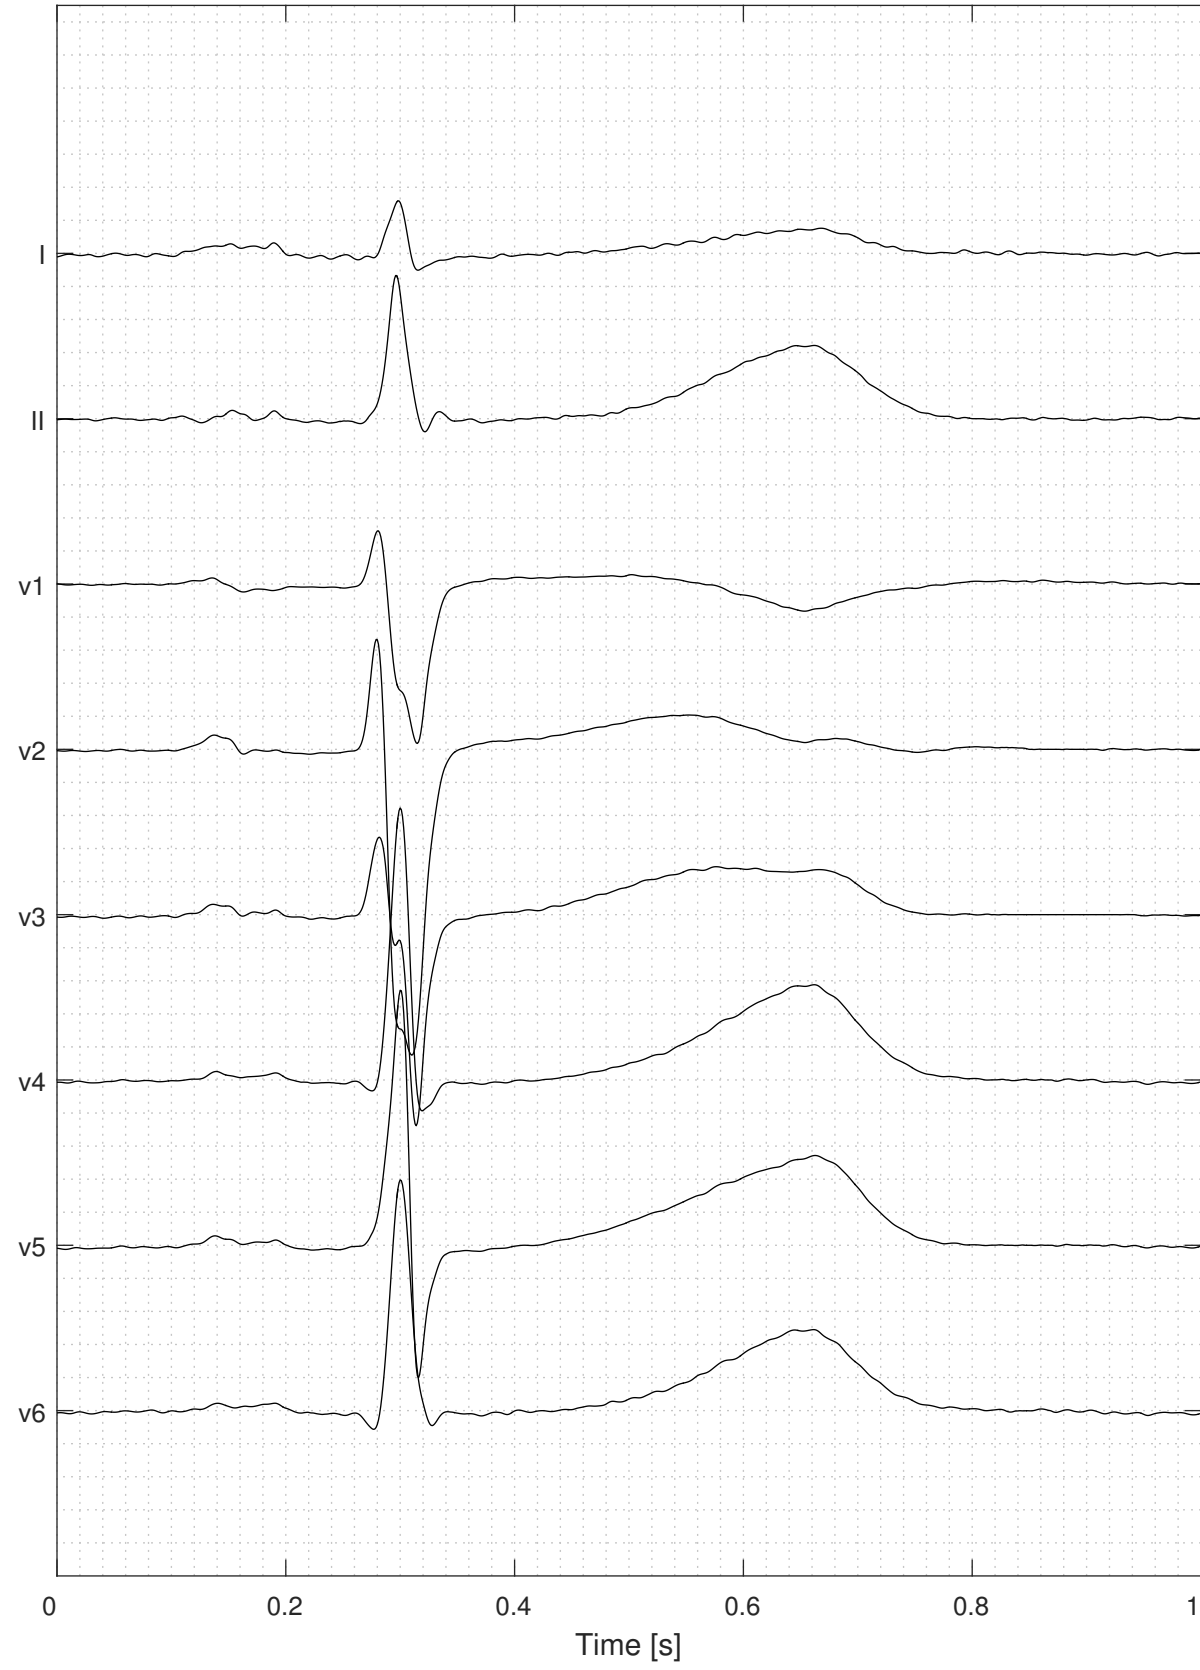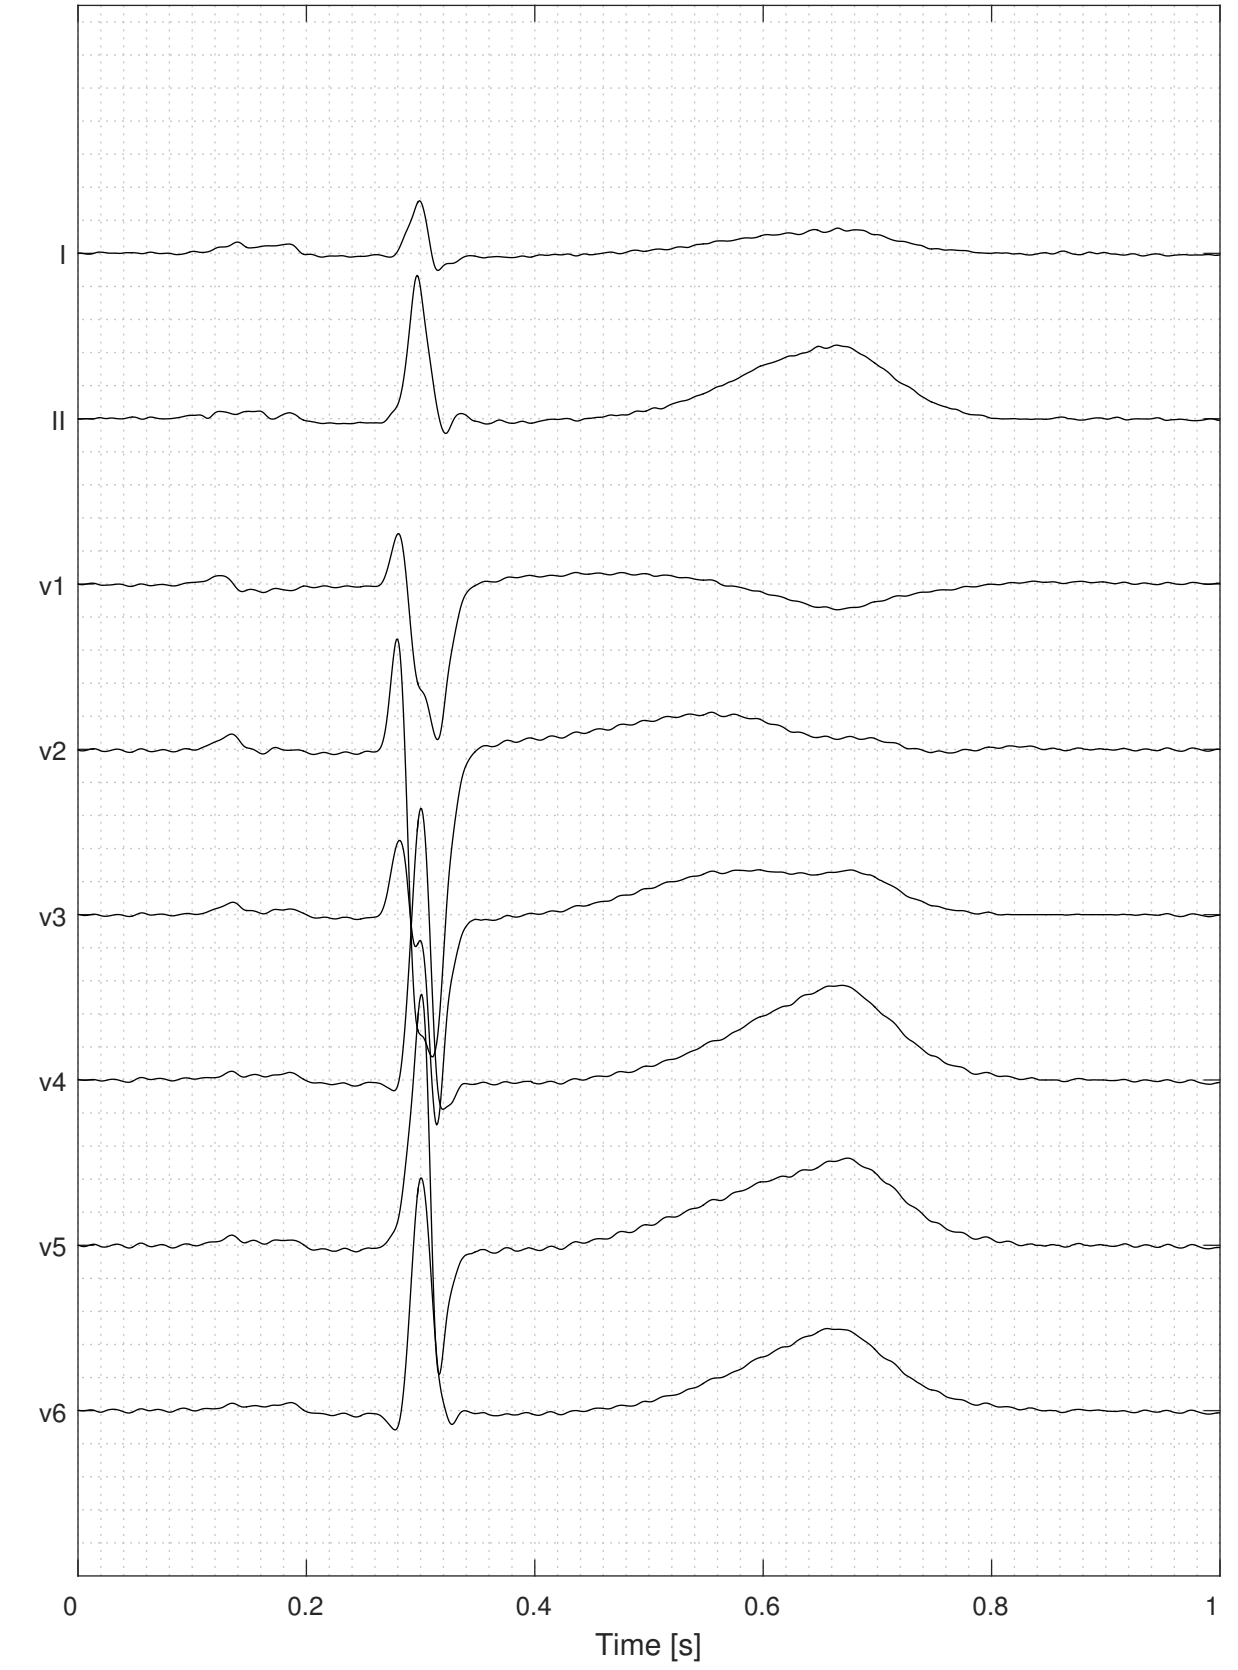



Patient 81

Low RR, Complex #: 157

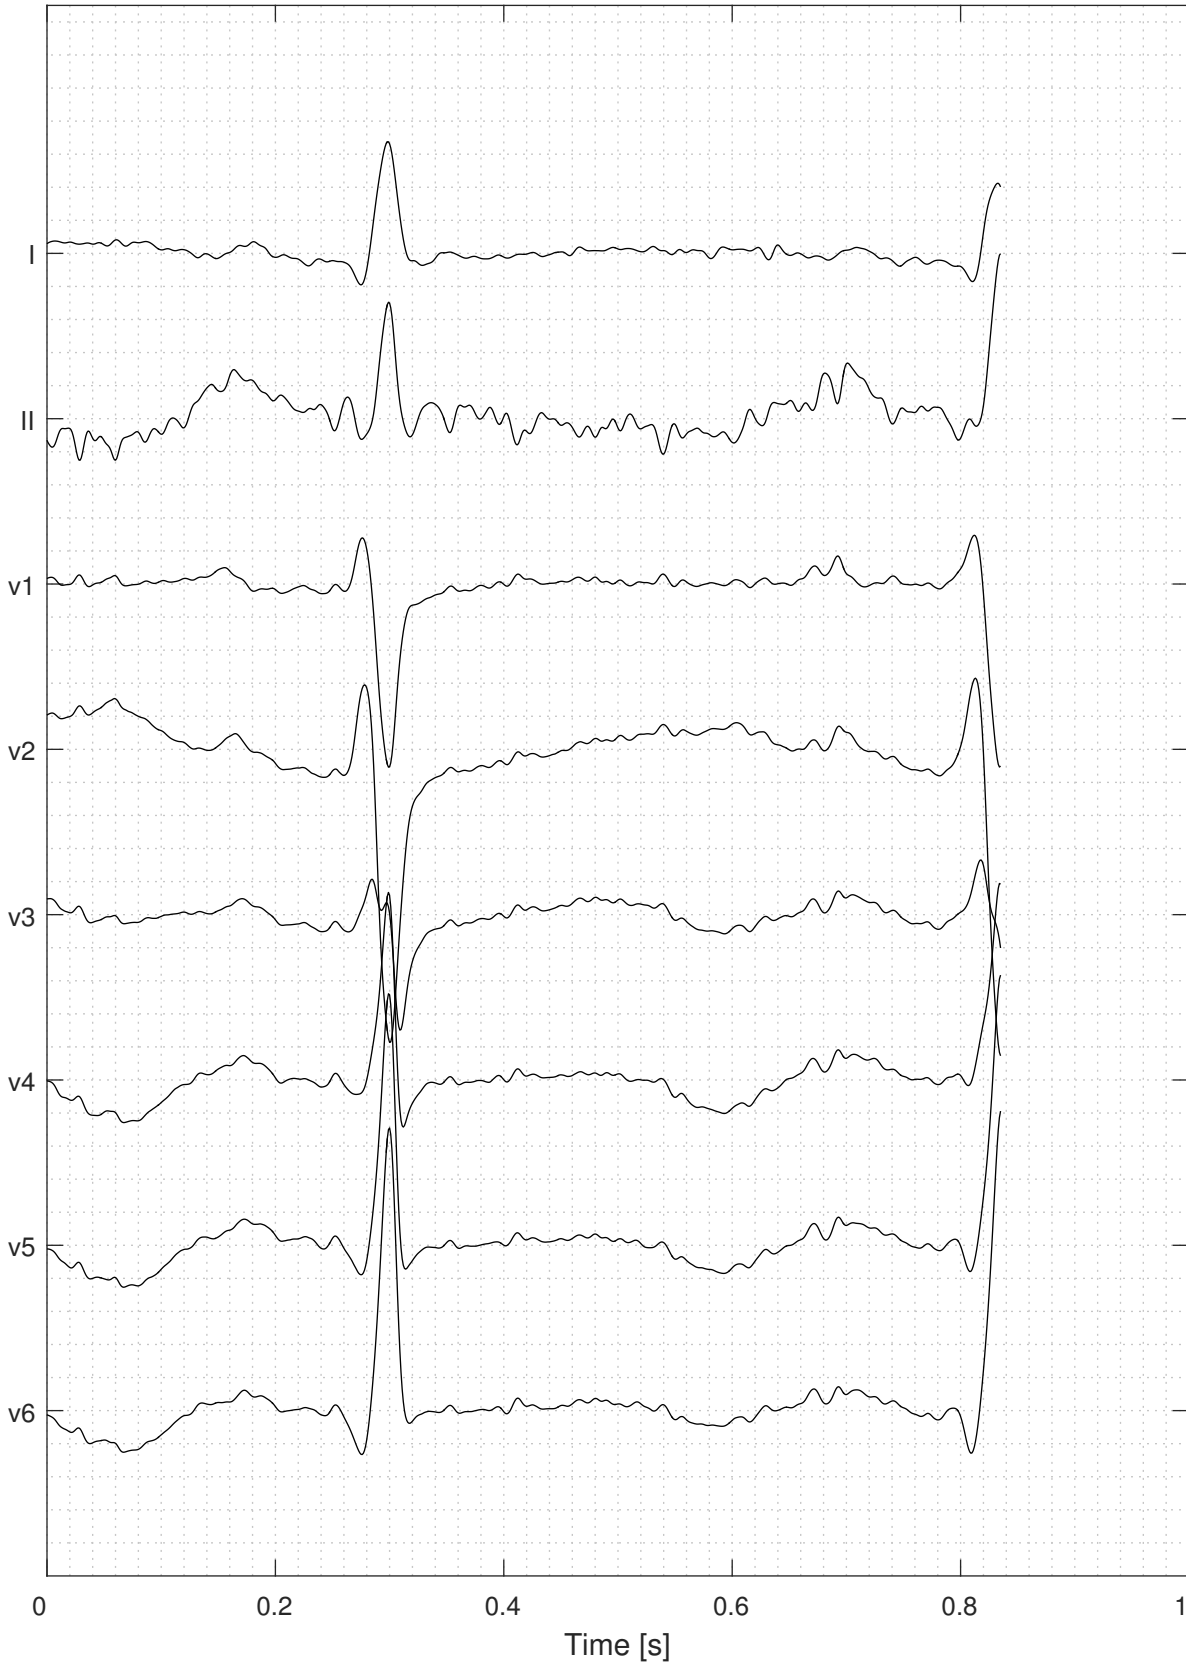

Mid RR, Complex #: 102

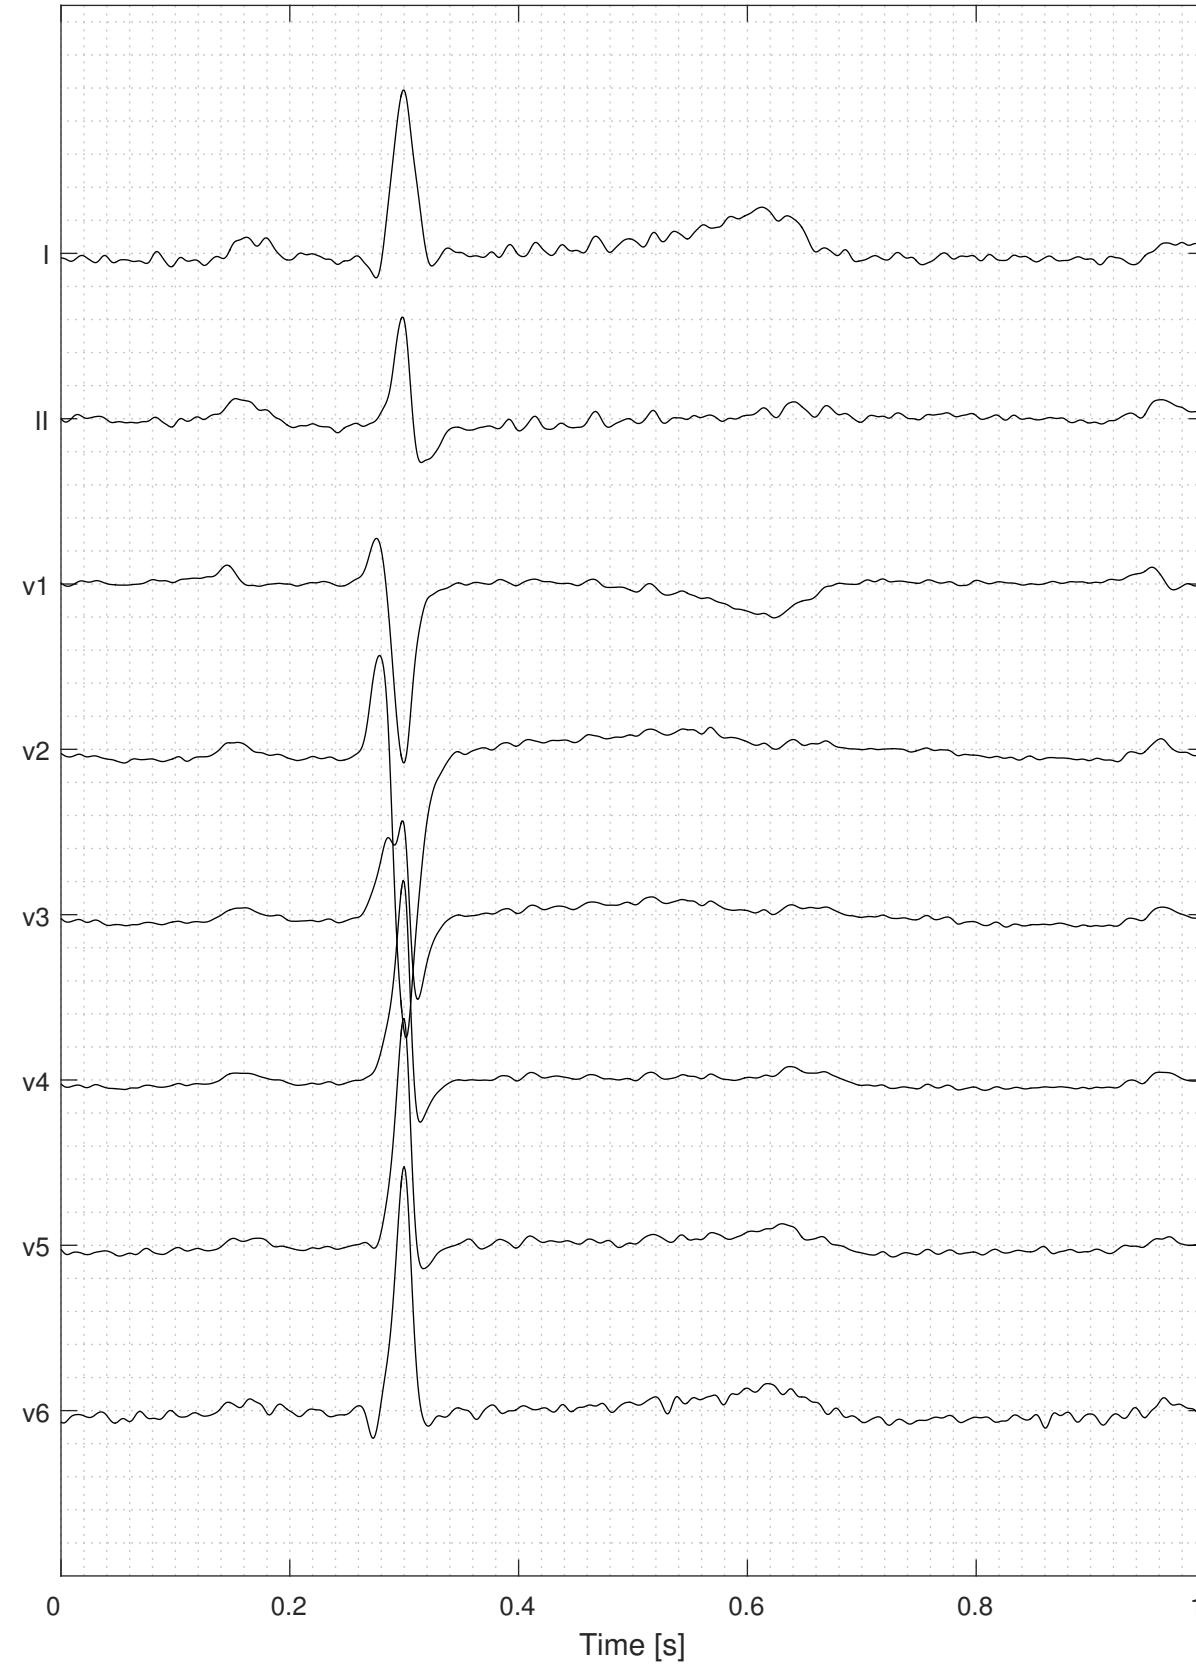

High RR, Complex #: 6

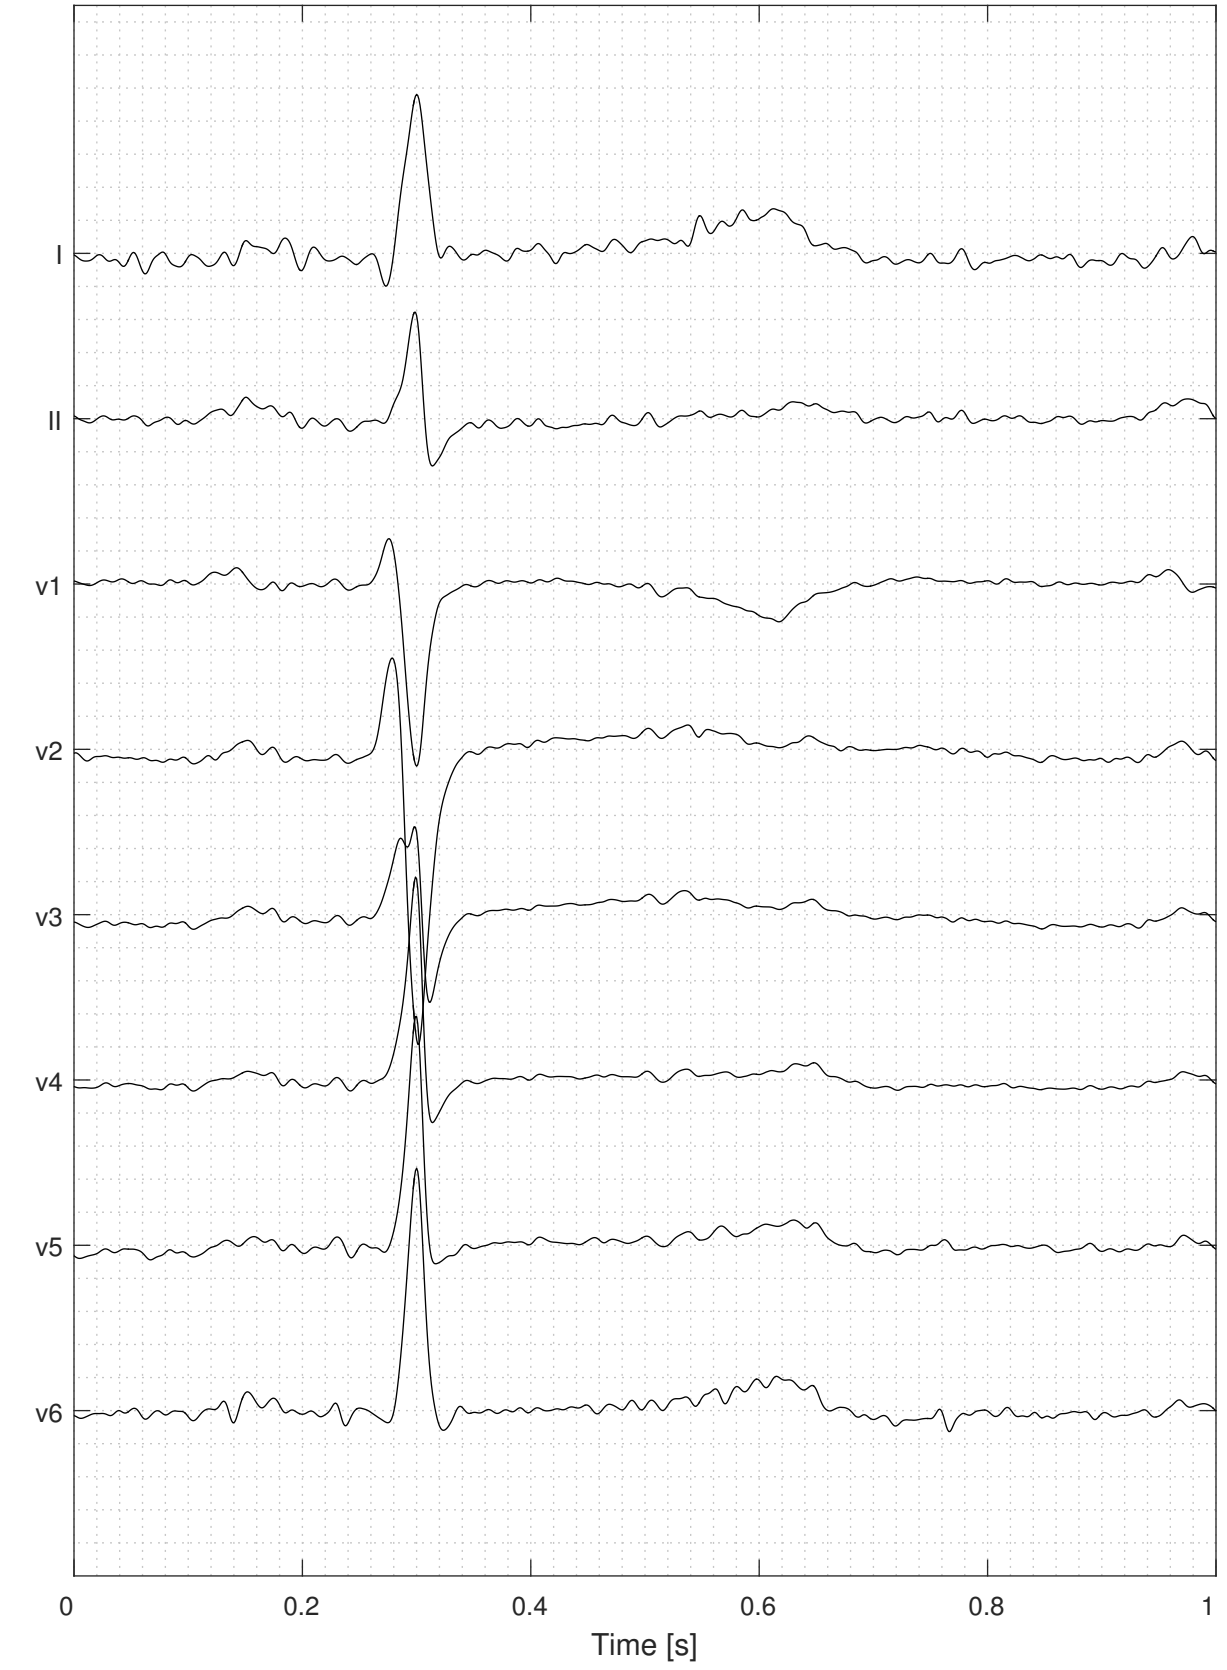

Patient 82

Low RR, Complex #: 260

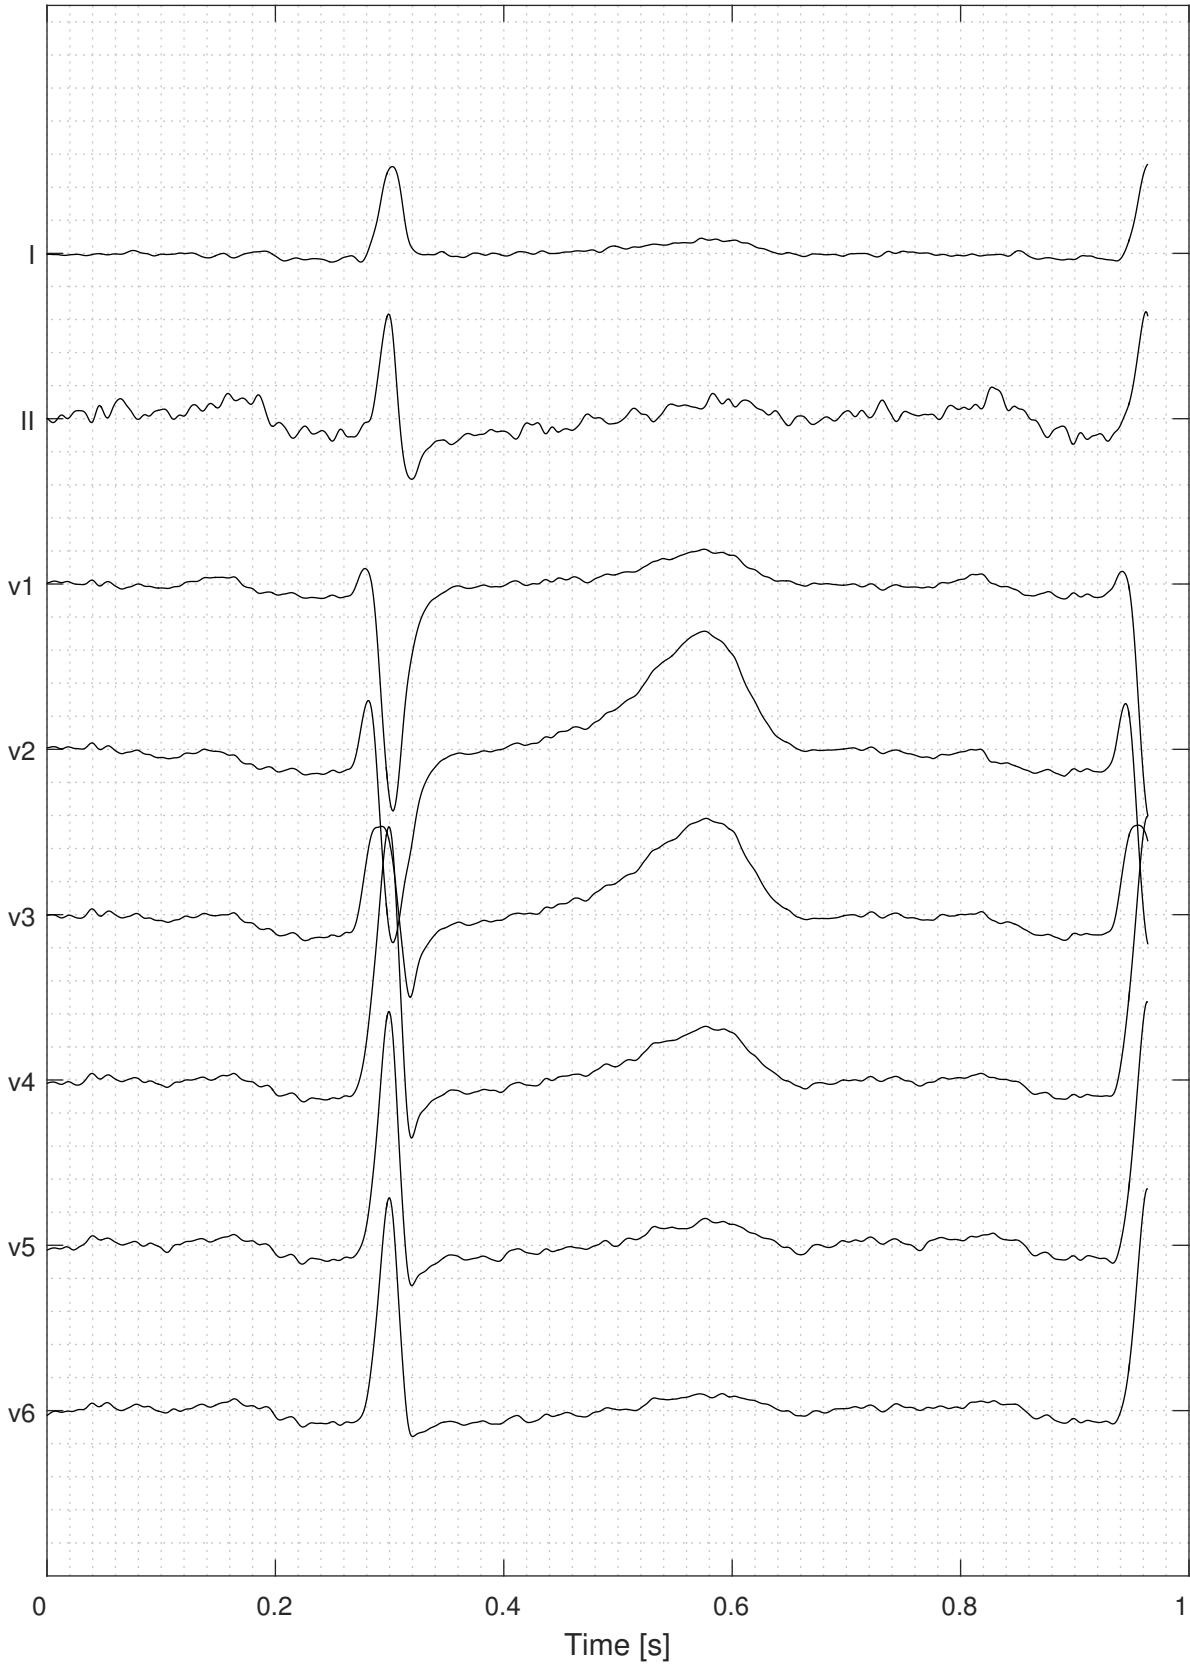

Mid RR, Complex #: 77

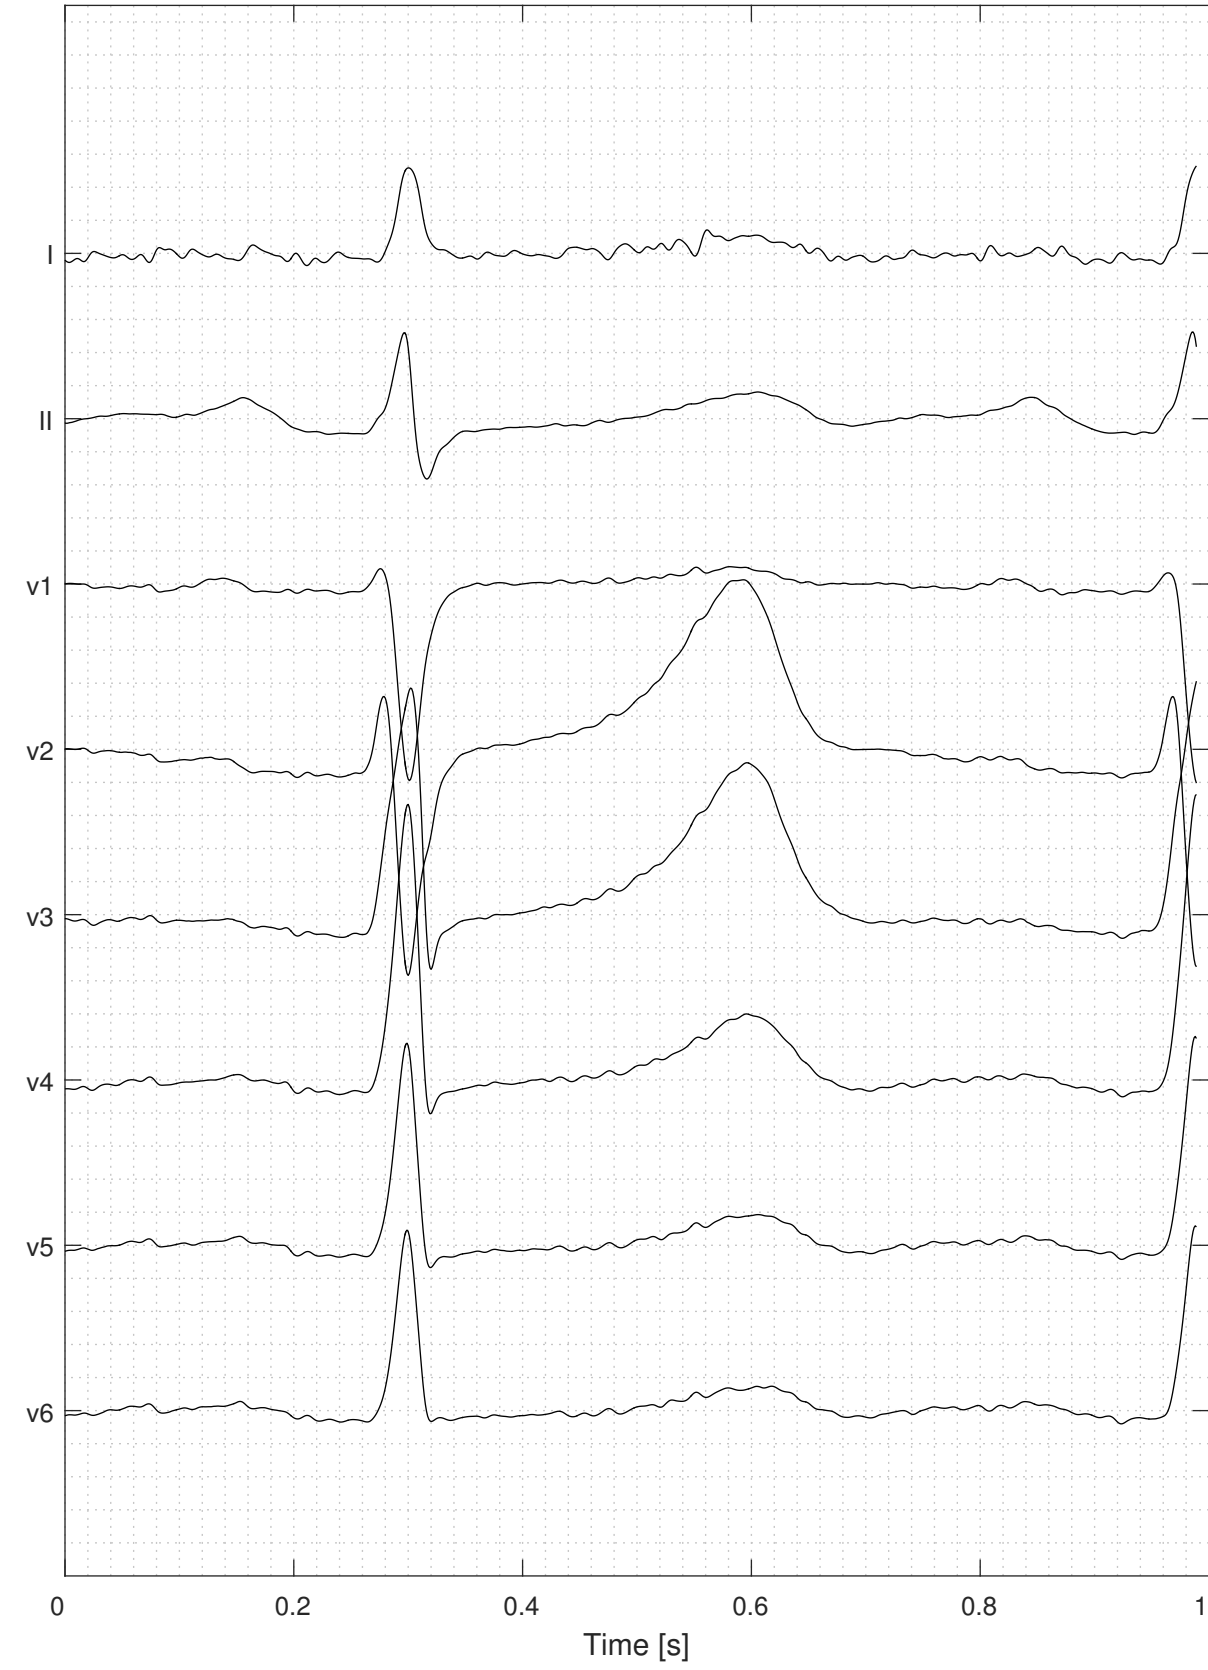

High RR, Complex #: 18

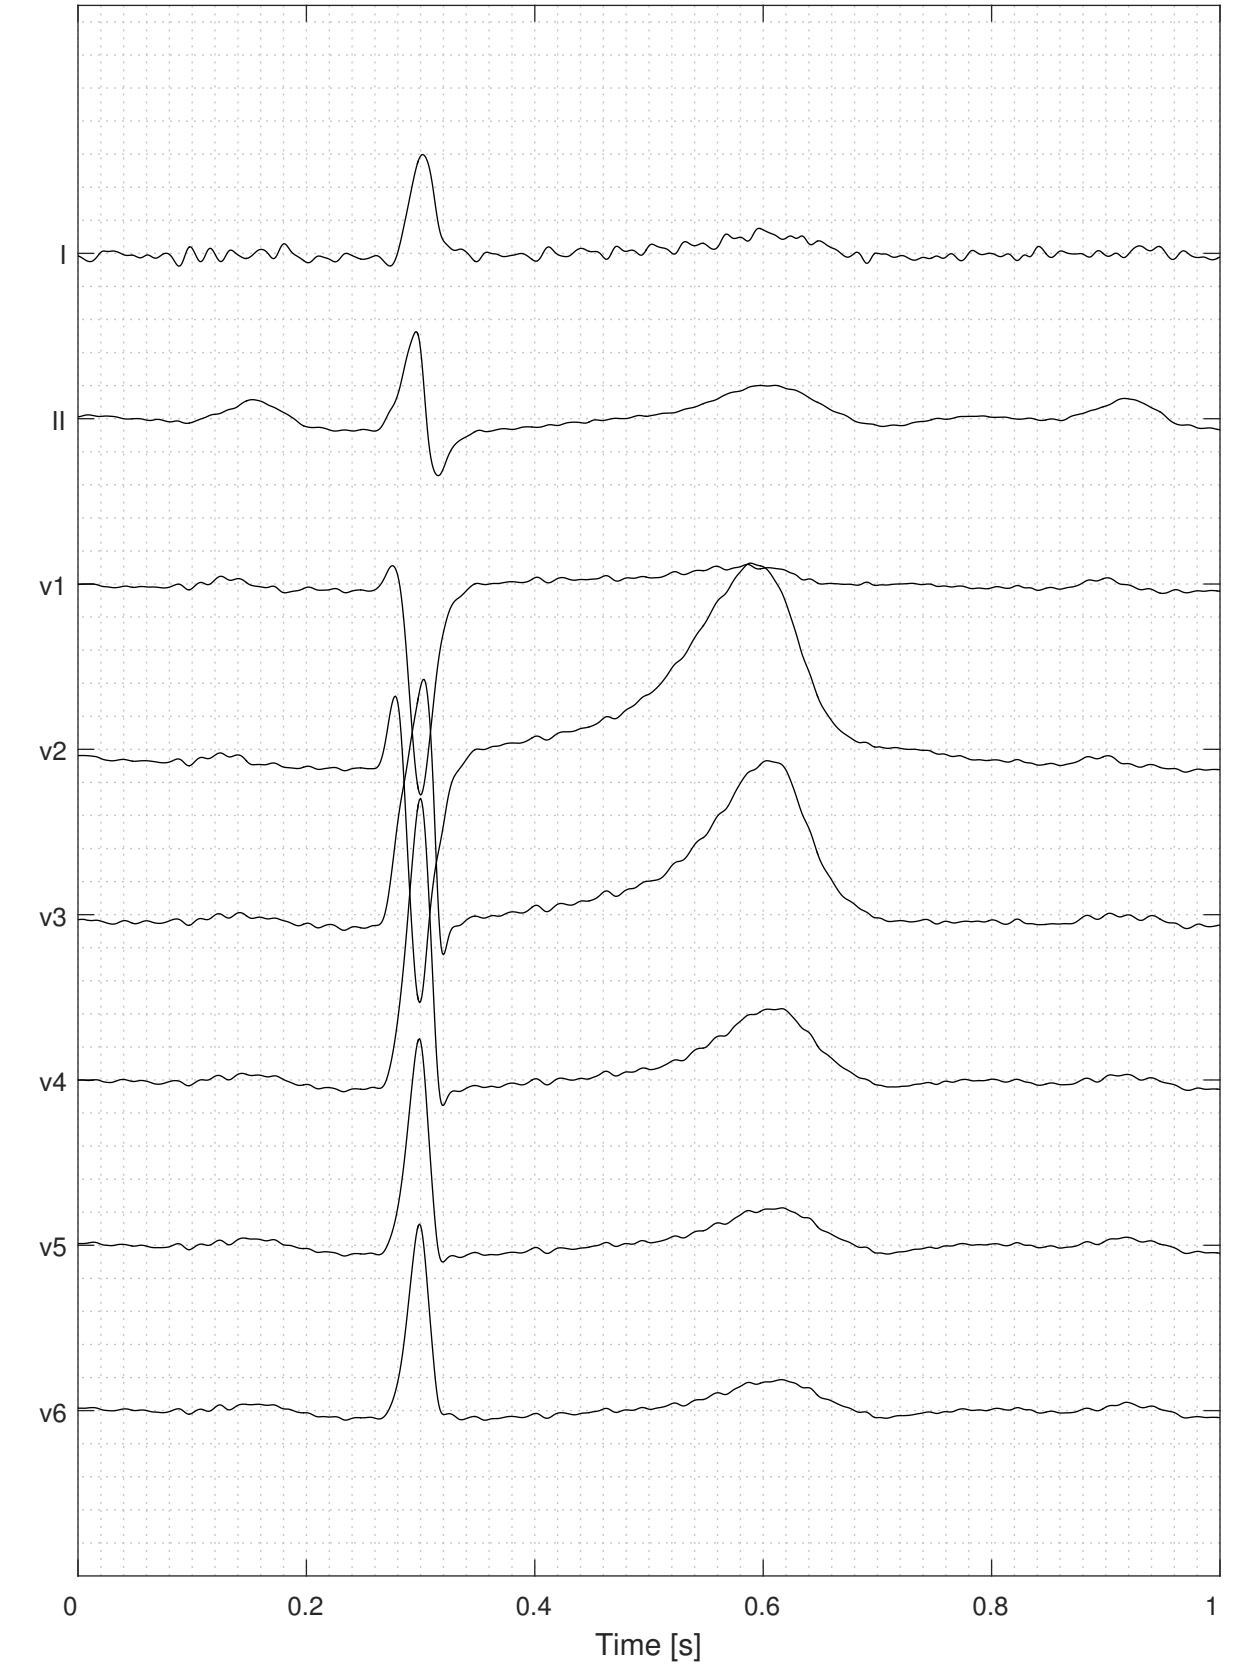

Patient 83

Low RR, Complex #: 173

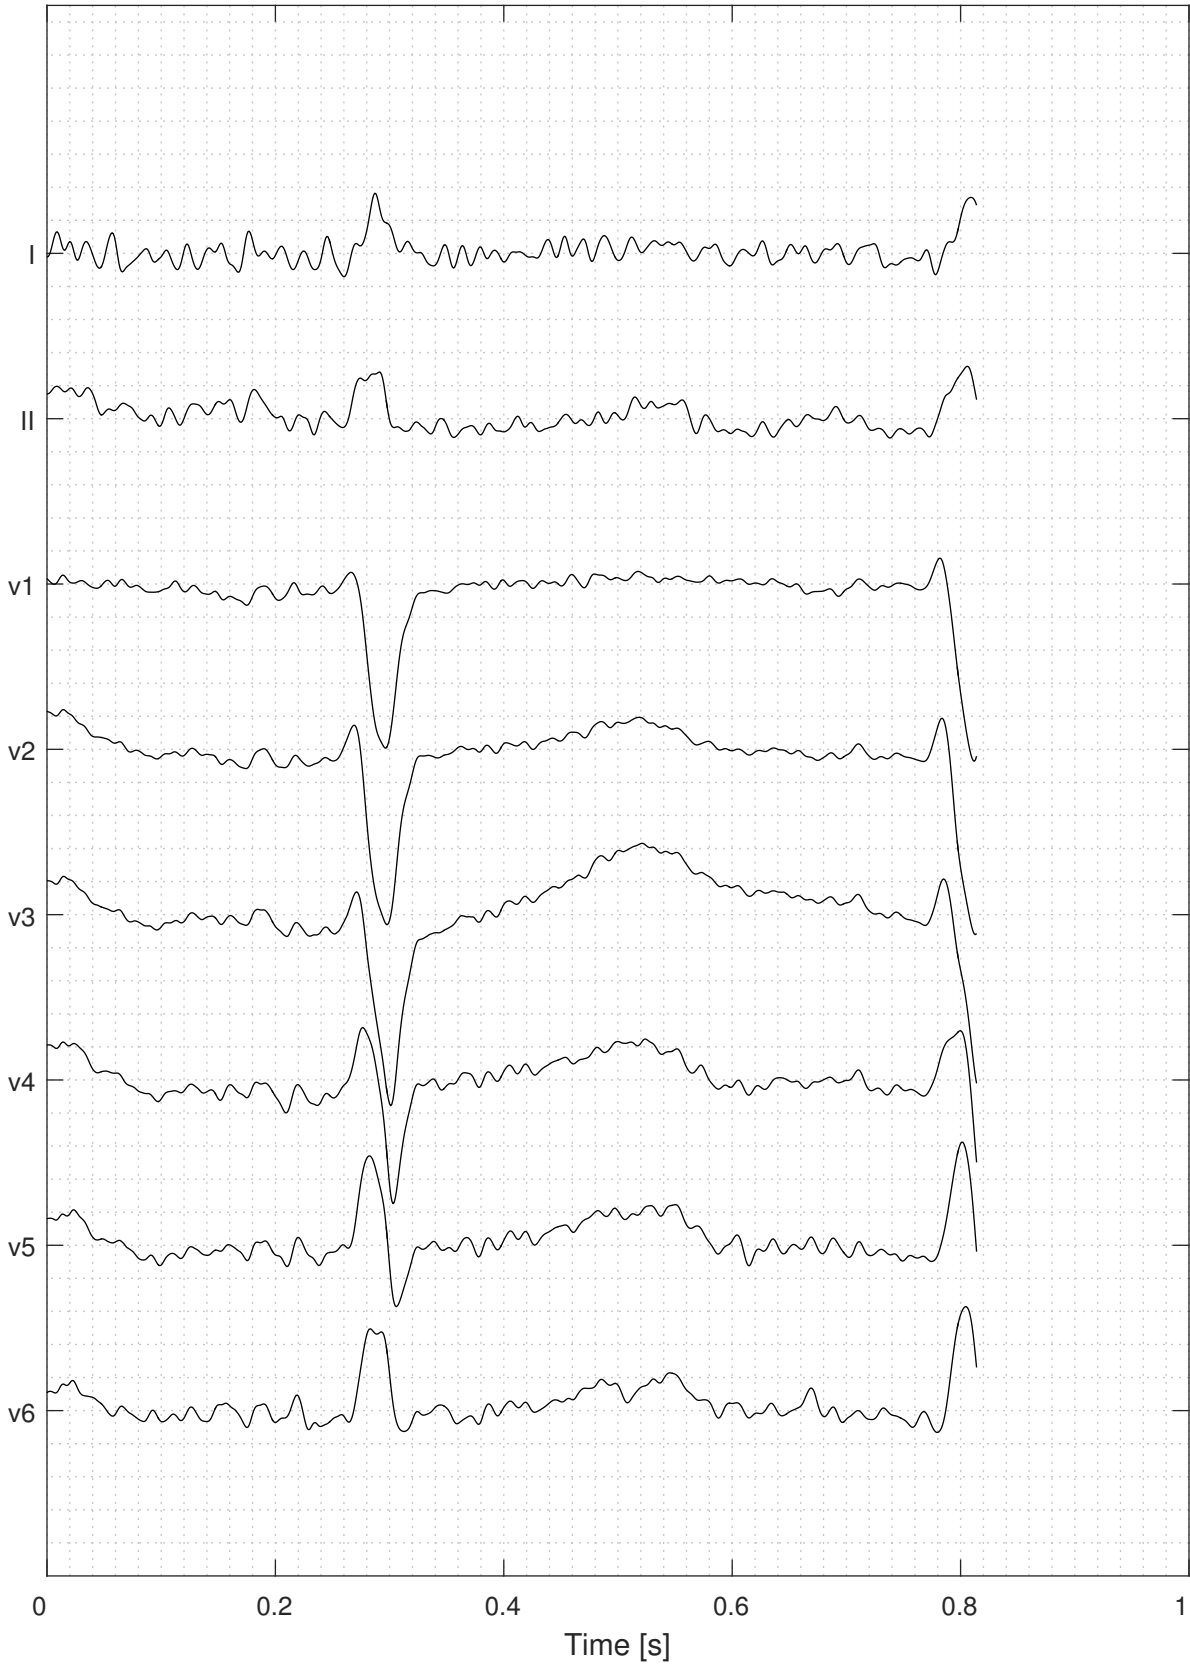

Mid RR, Complex #: 190

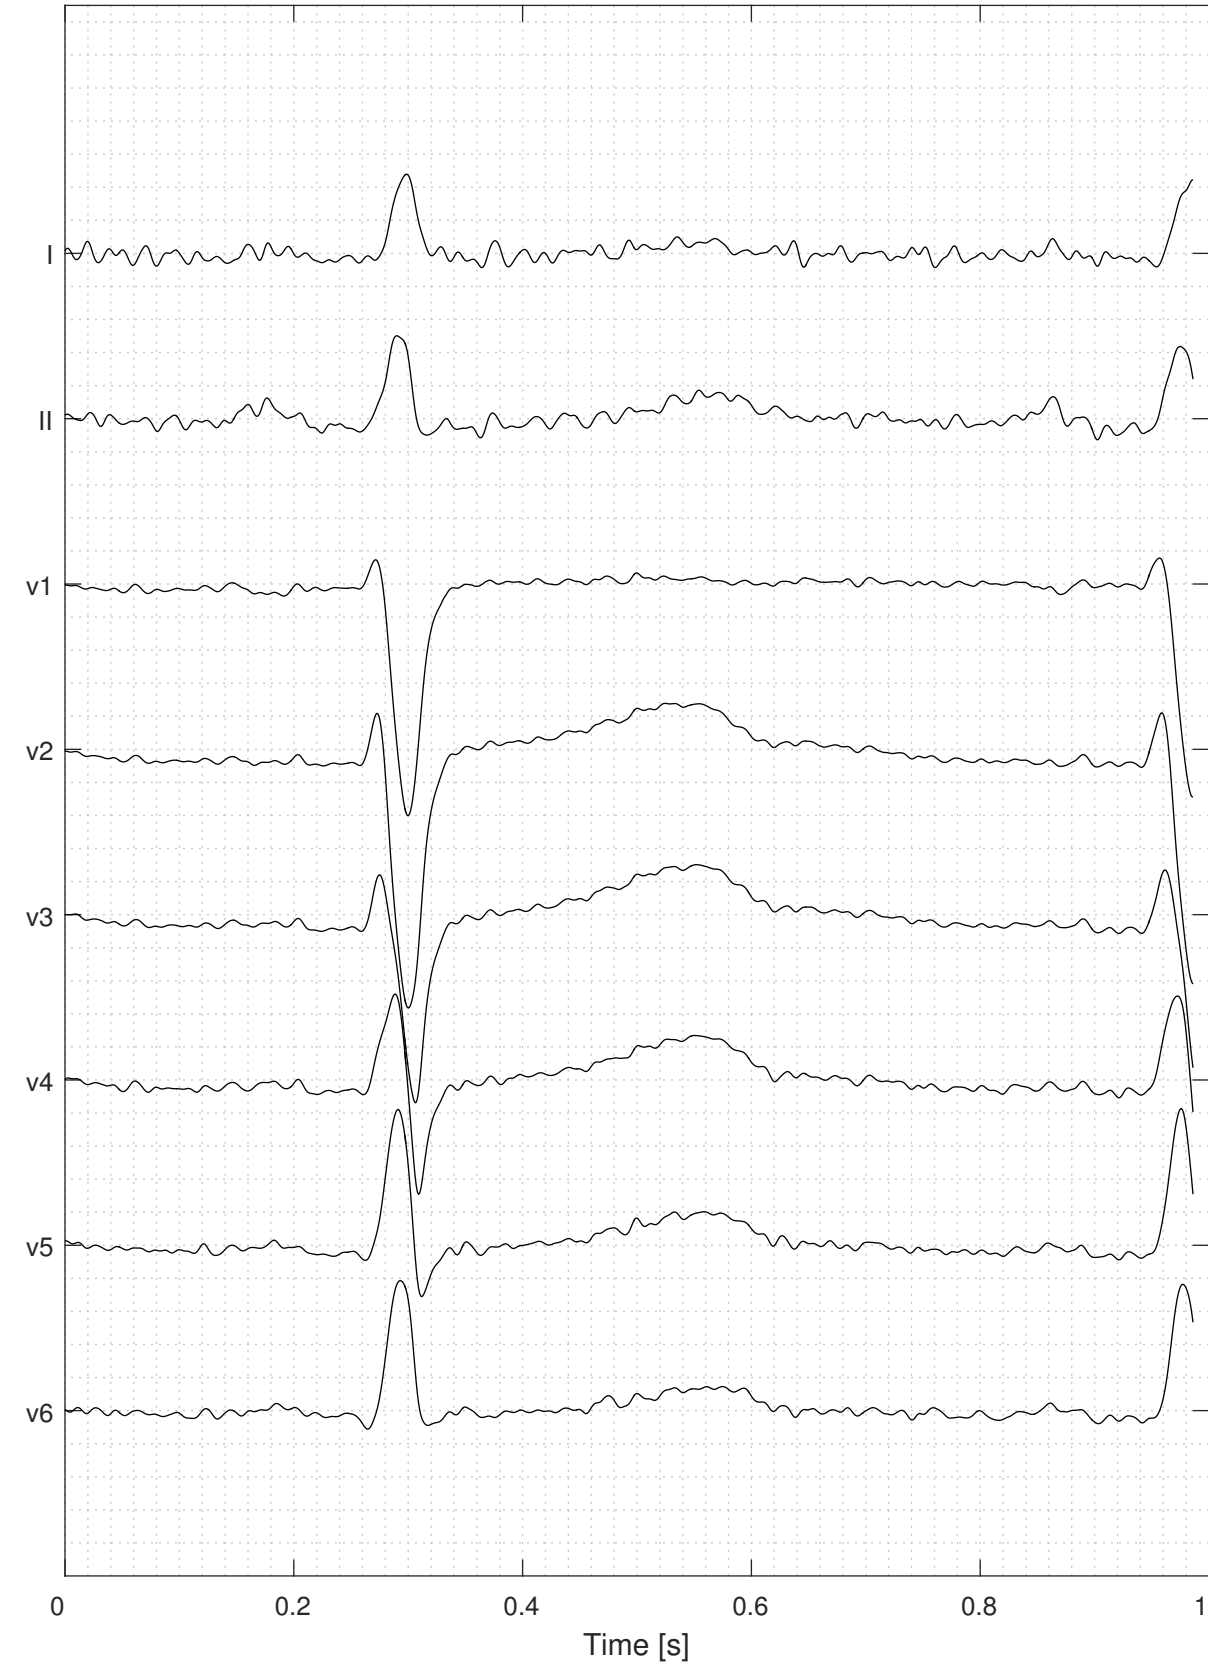

High RR, Complex #: 25

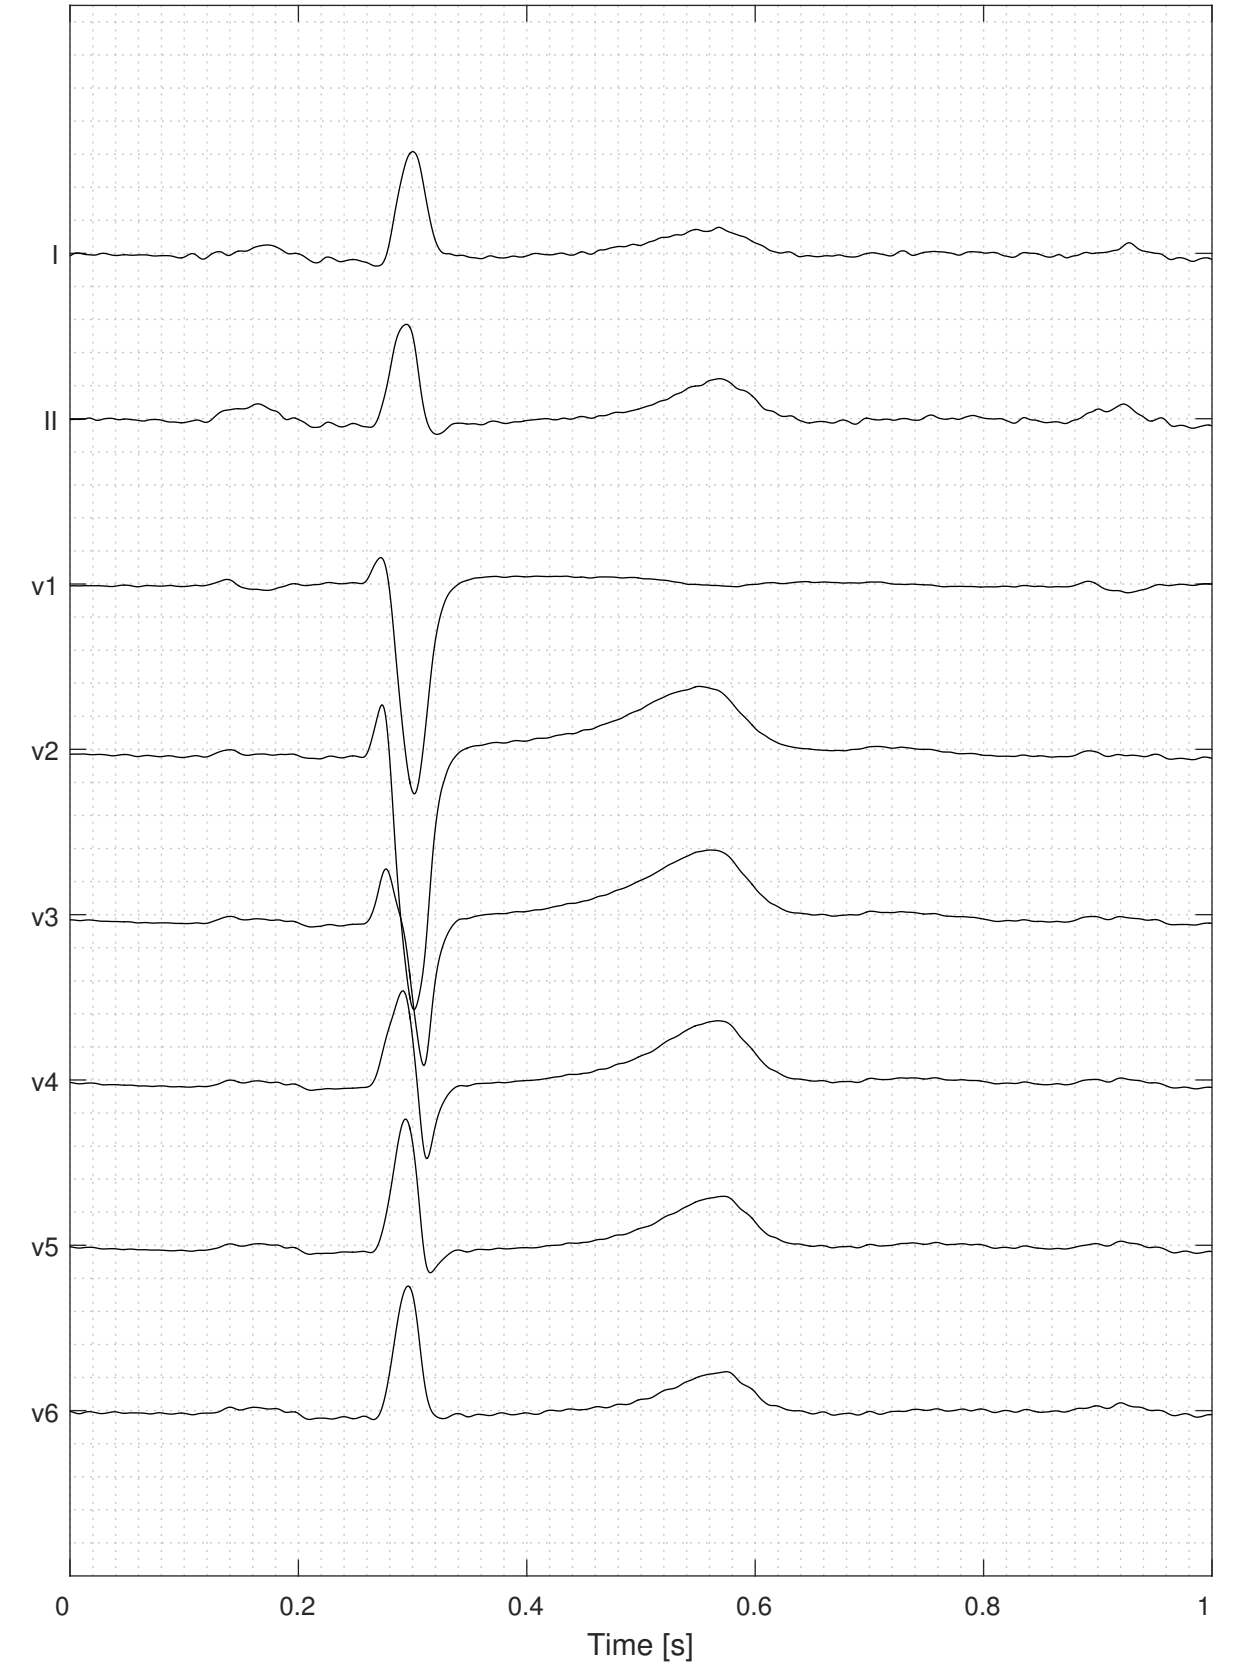

Patient 84

Low RR, Complex #: 280

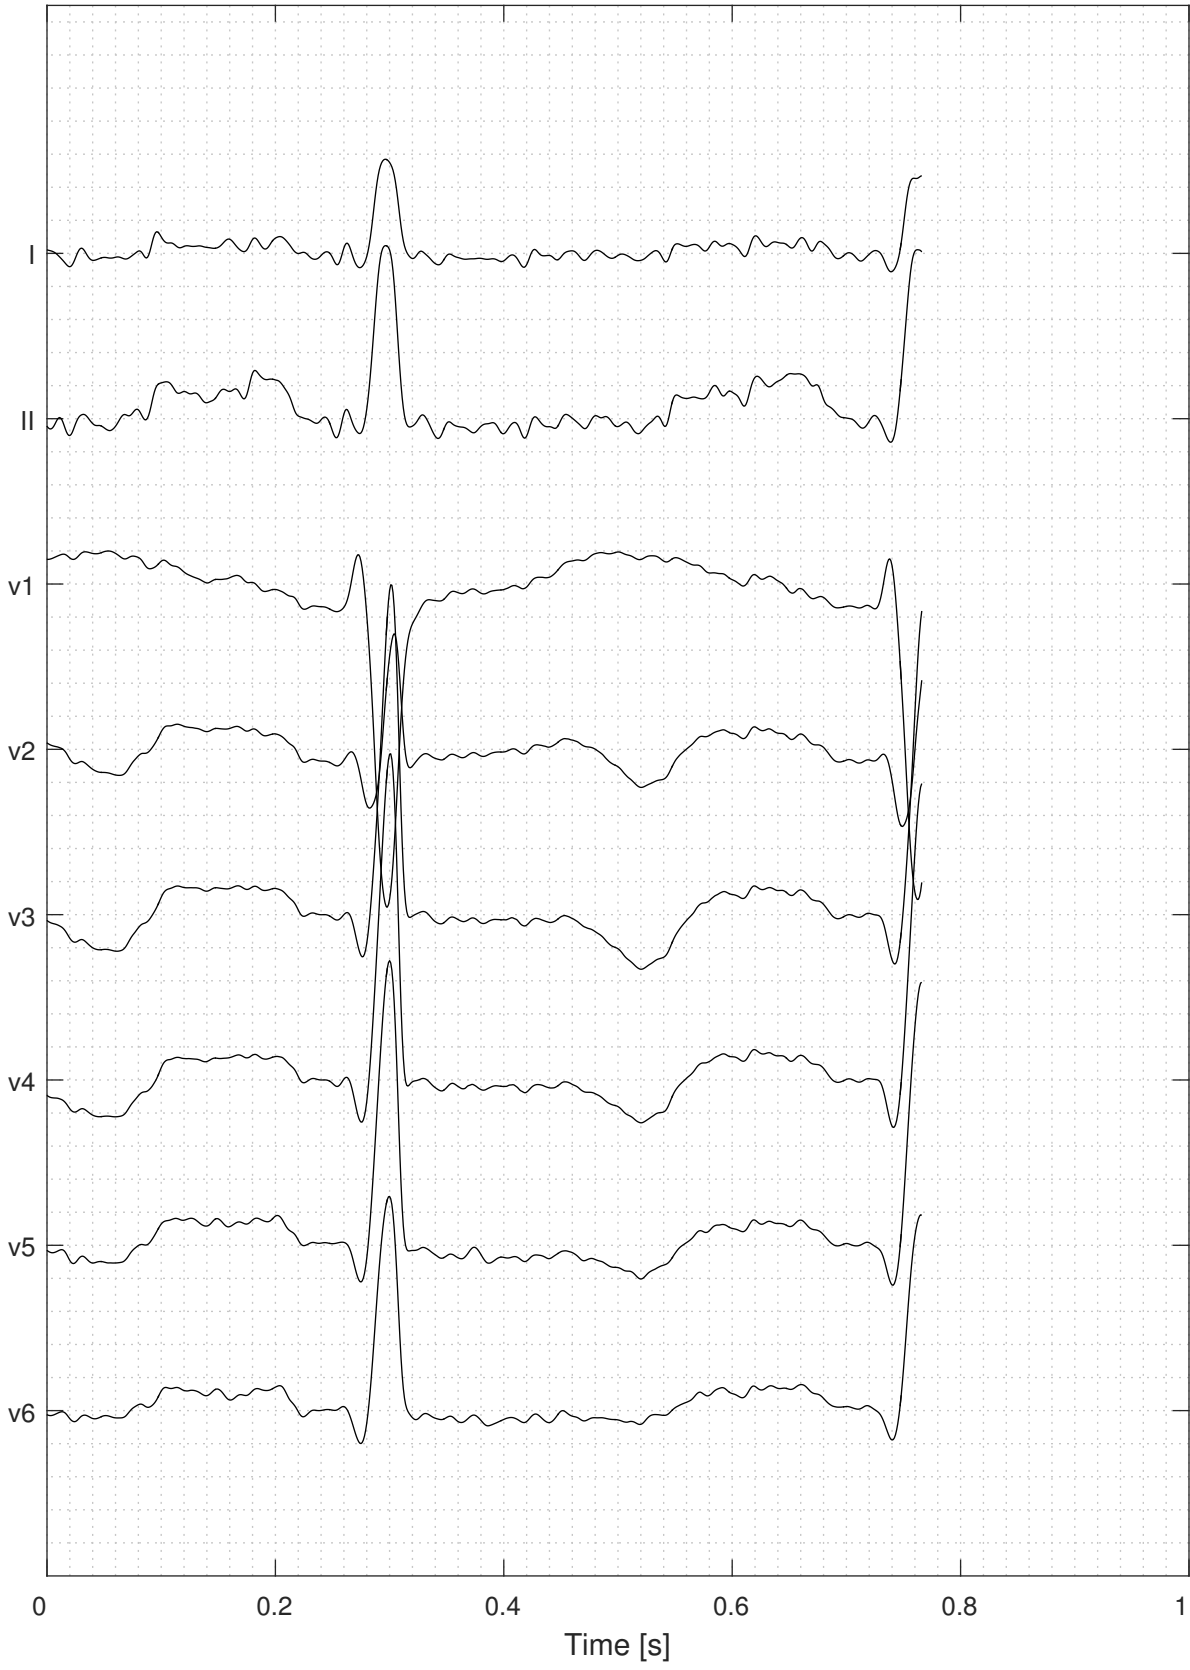

Mid RR, Complex #: 517

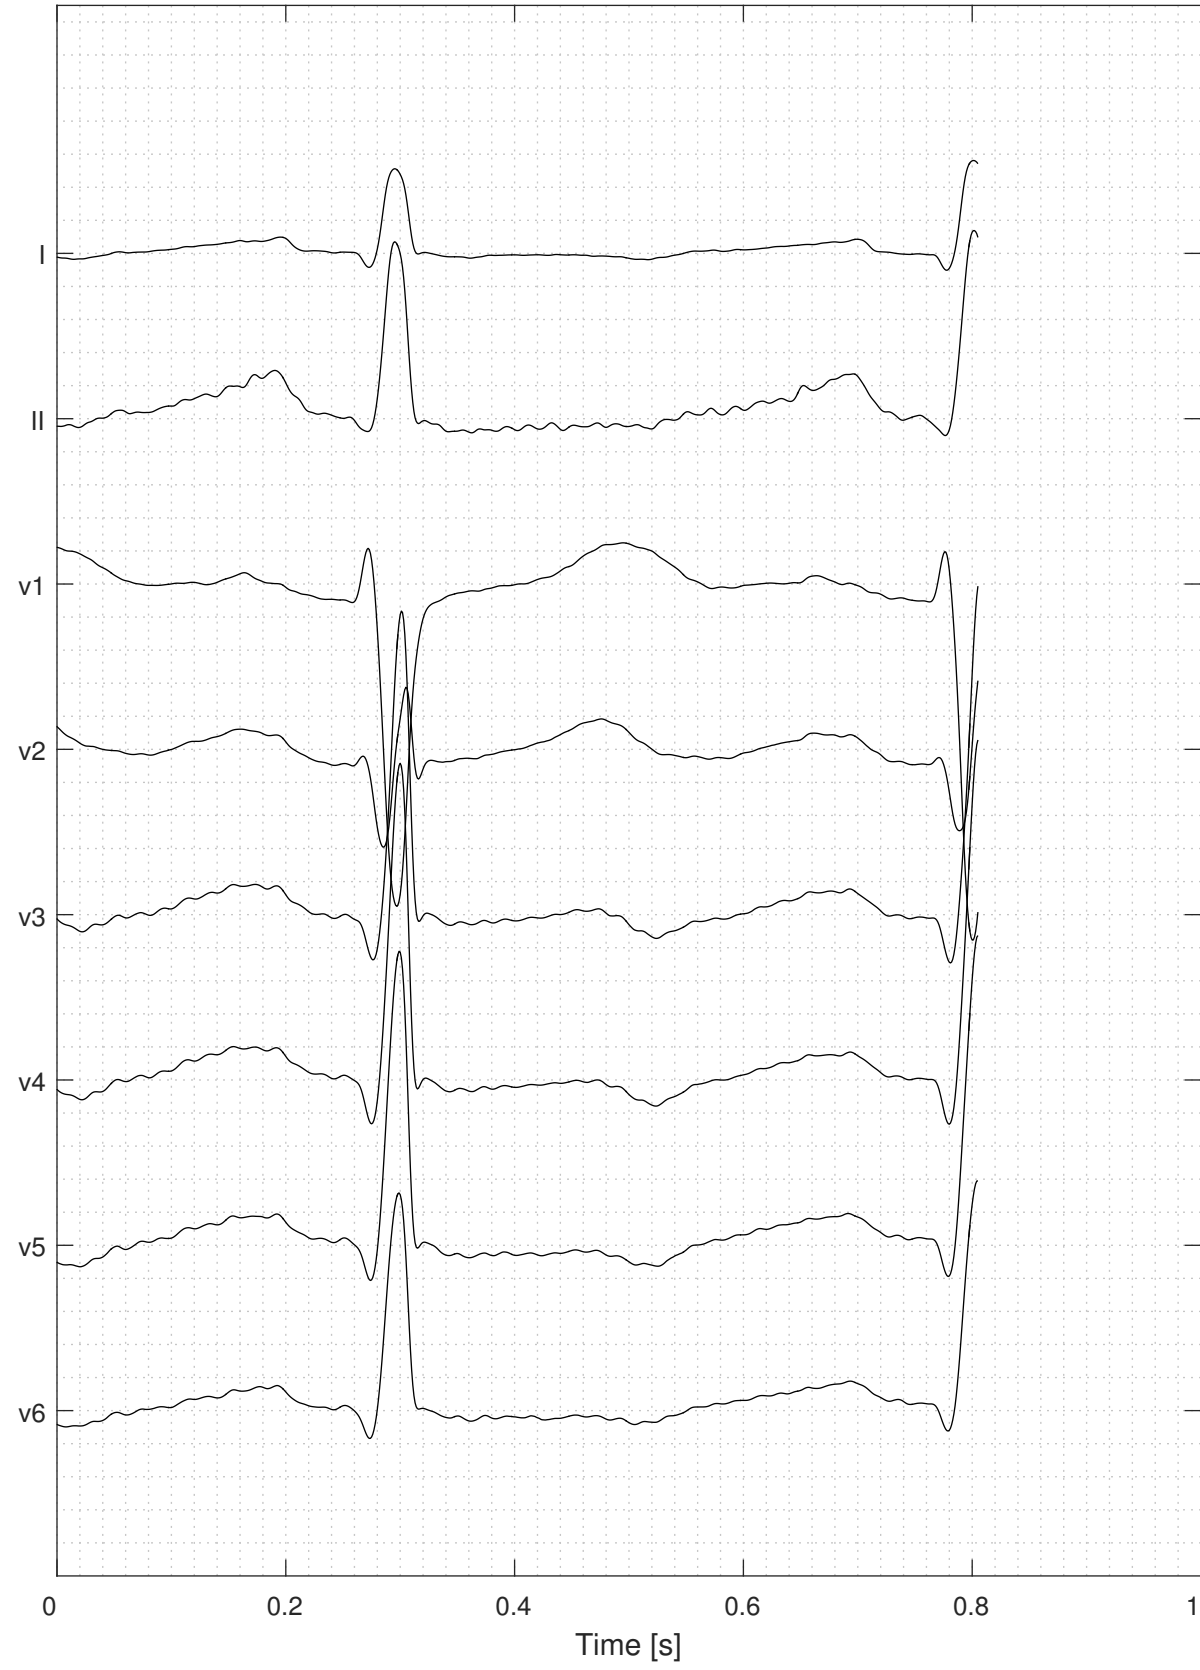

High RR, Complex #: 203

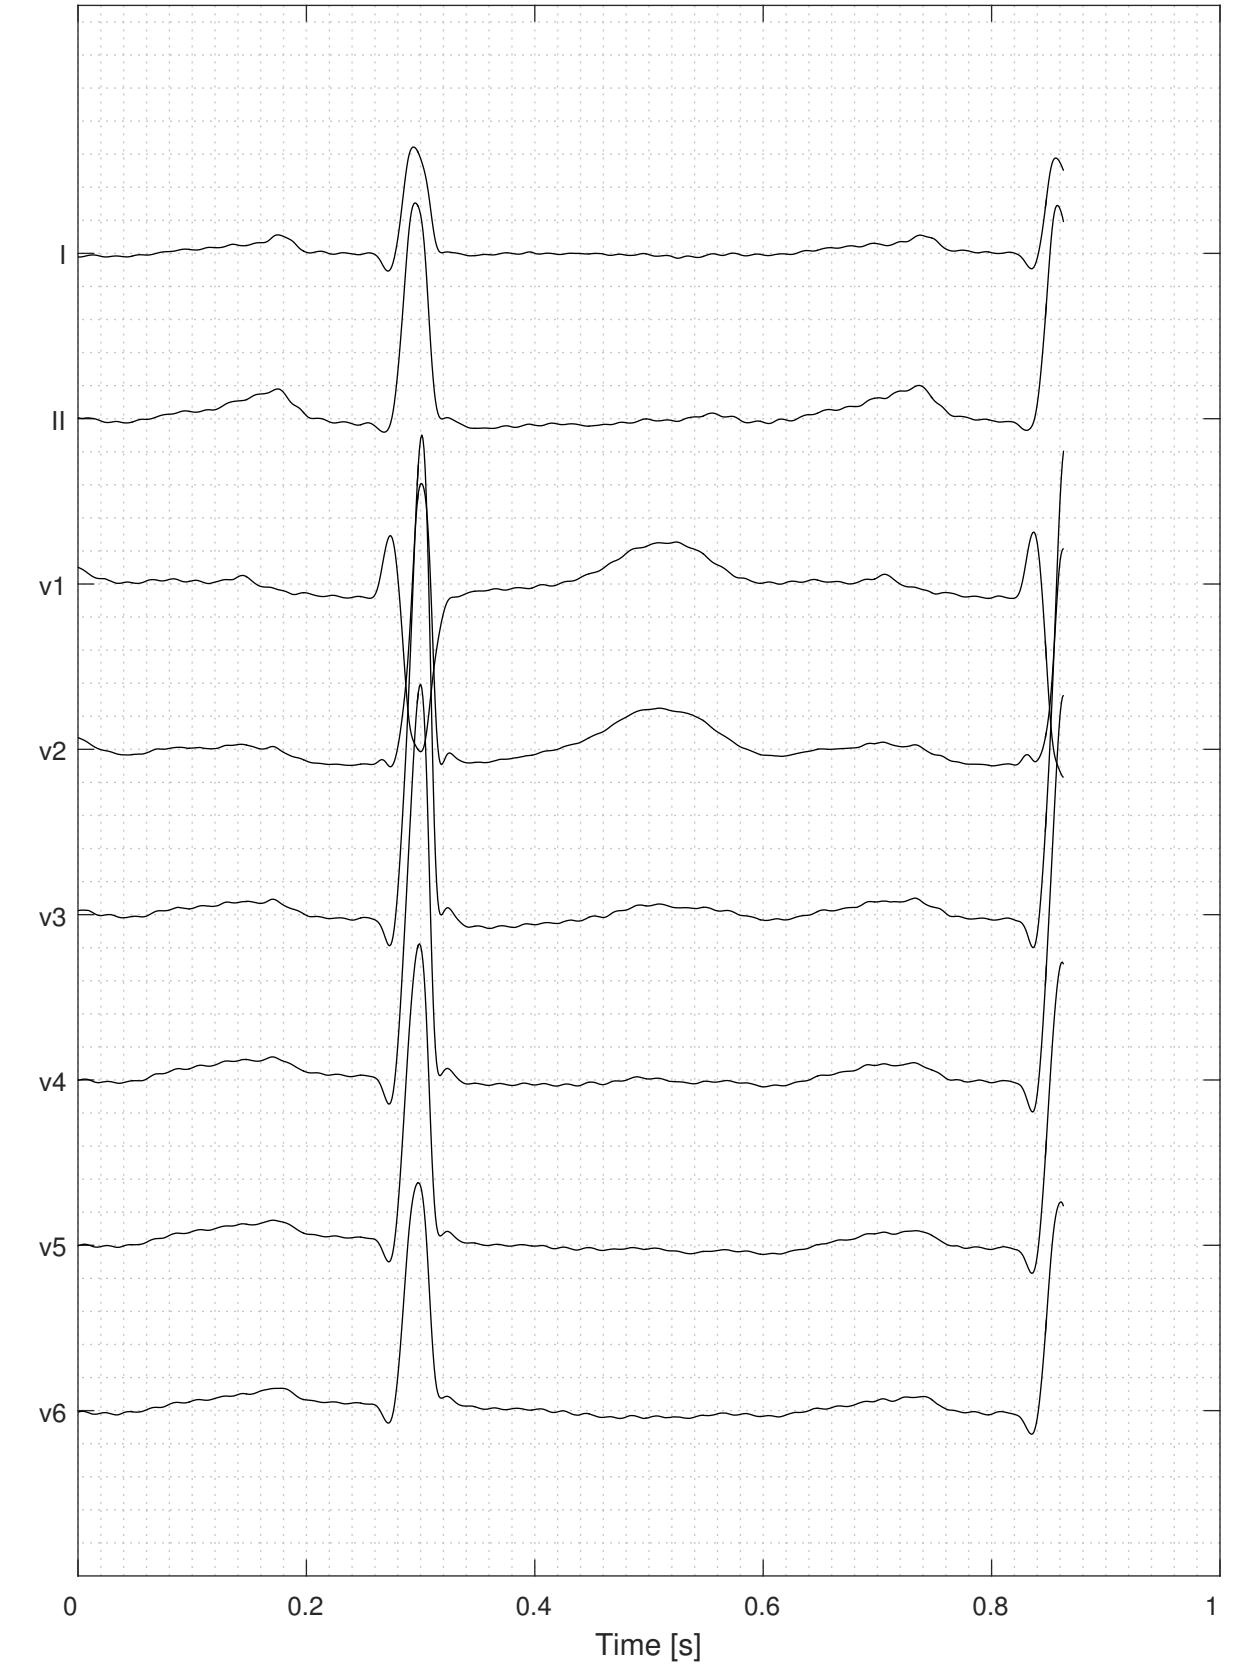

Patient 85

Low RR, Complex #: 220

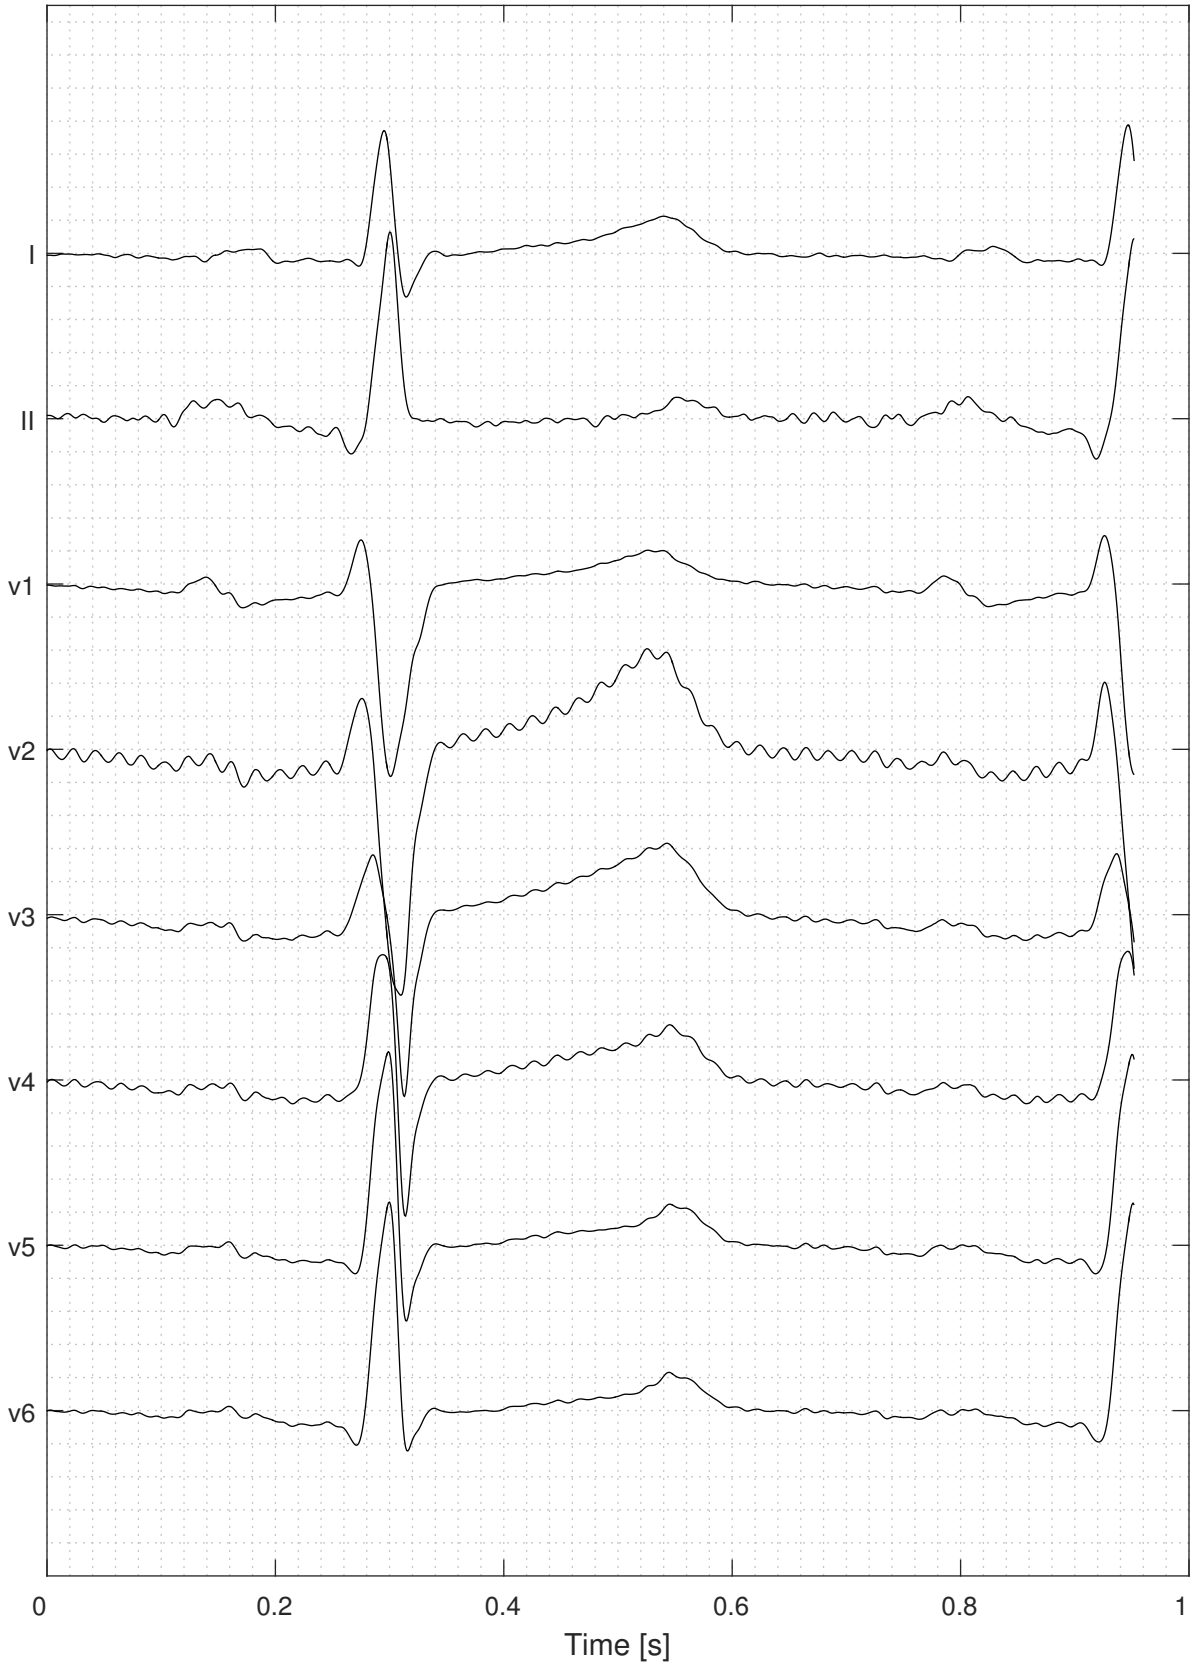

Mid RR, Complex #: 180

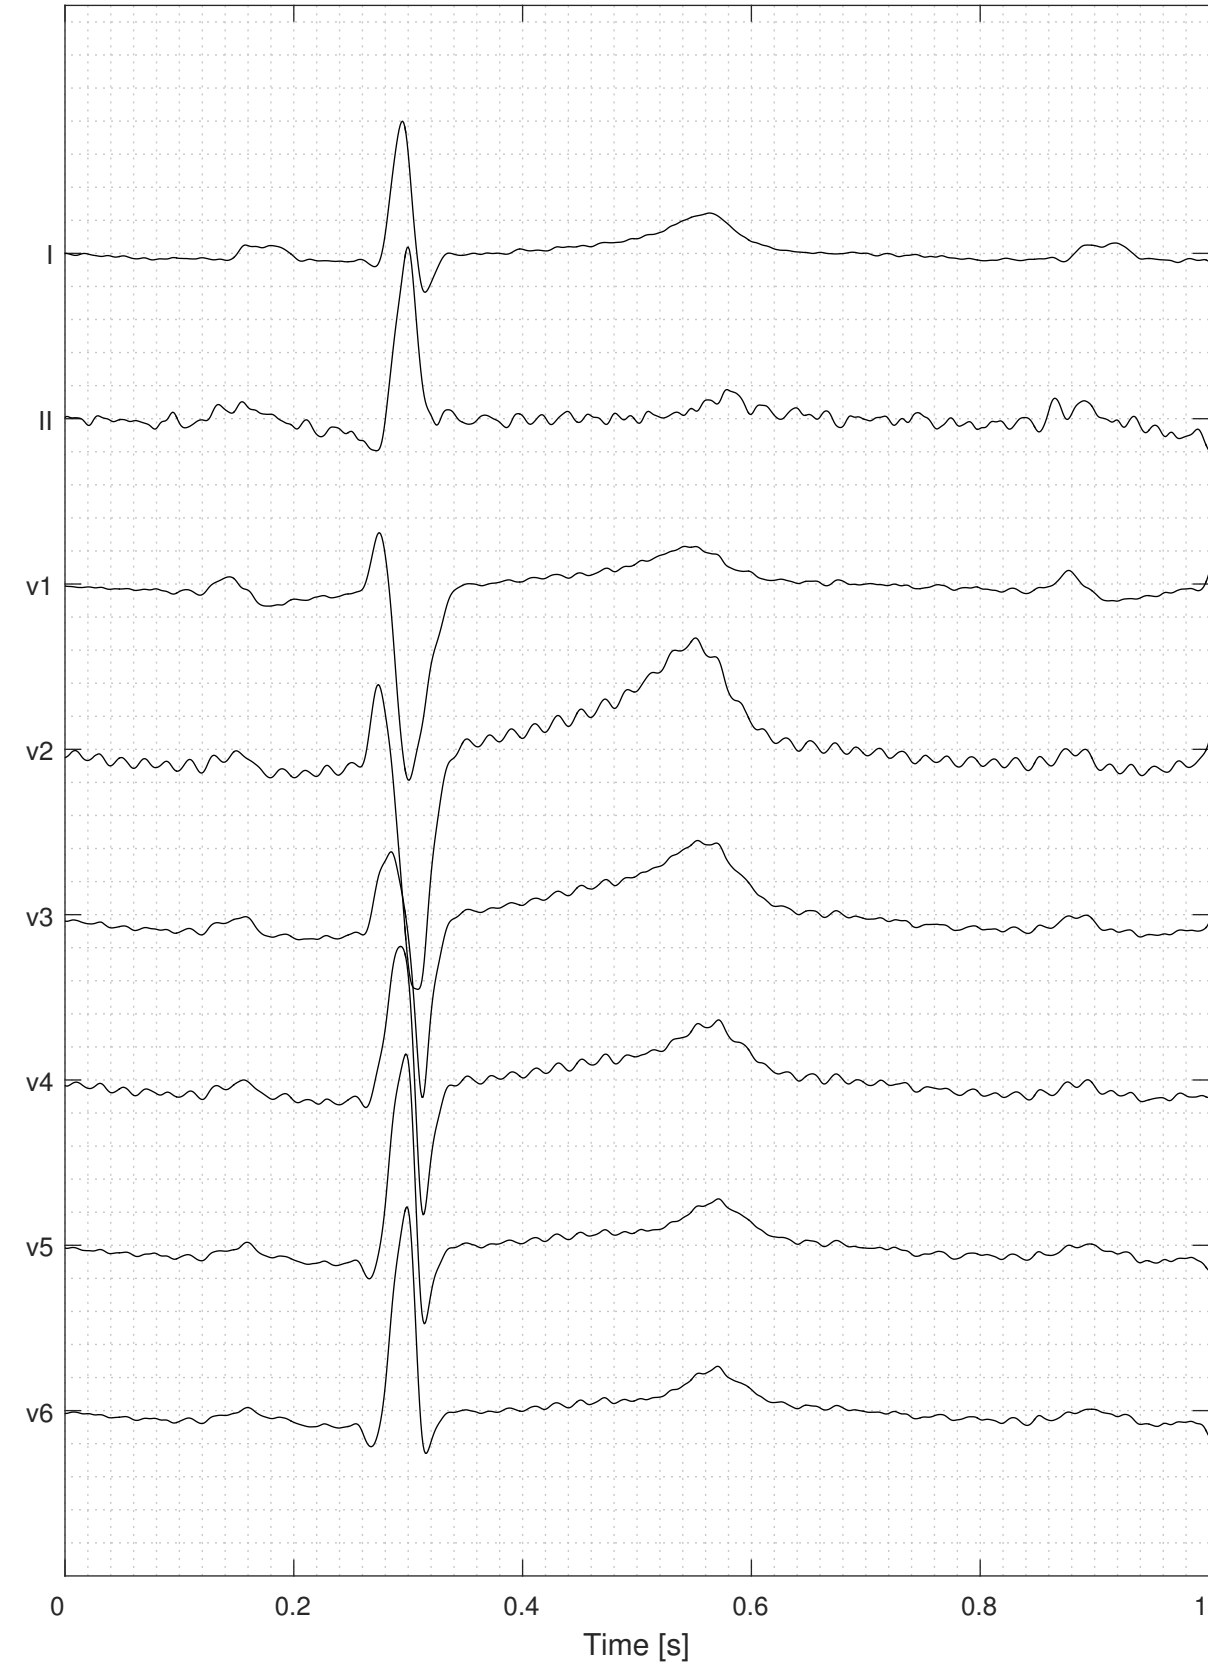

High RR, Complex #: 79

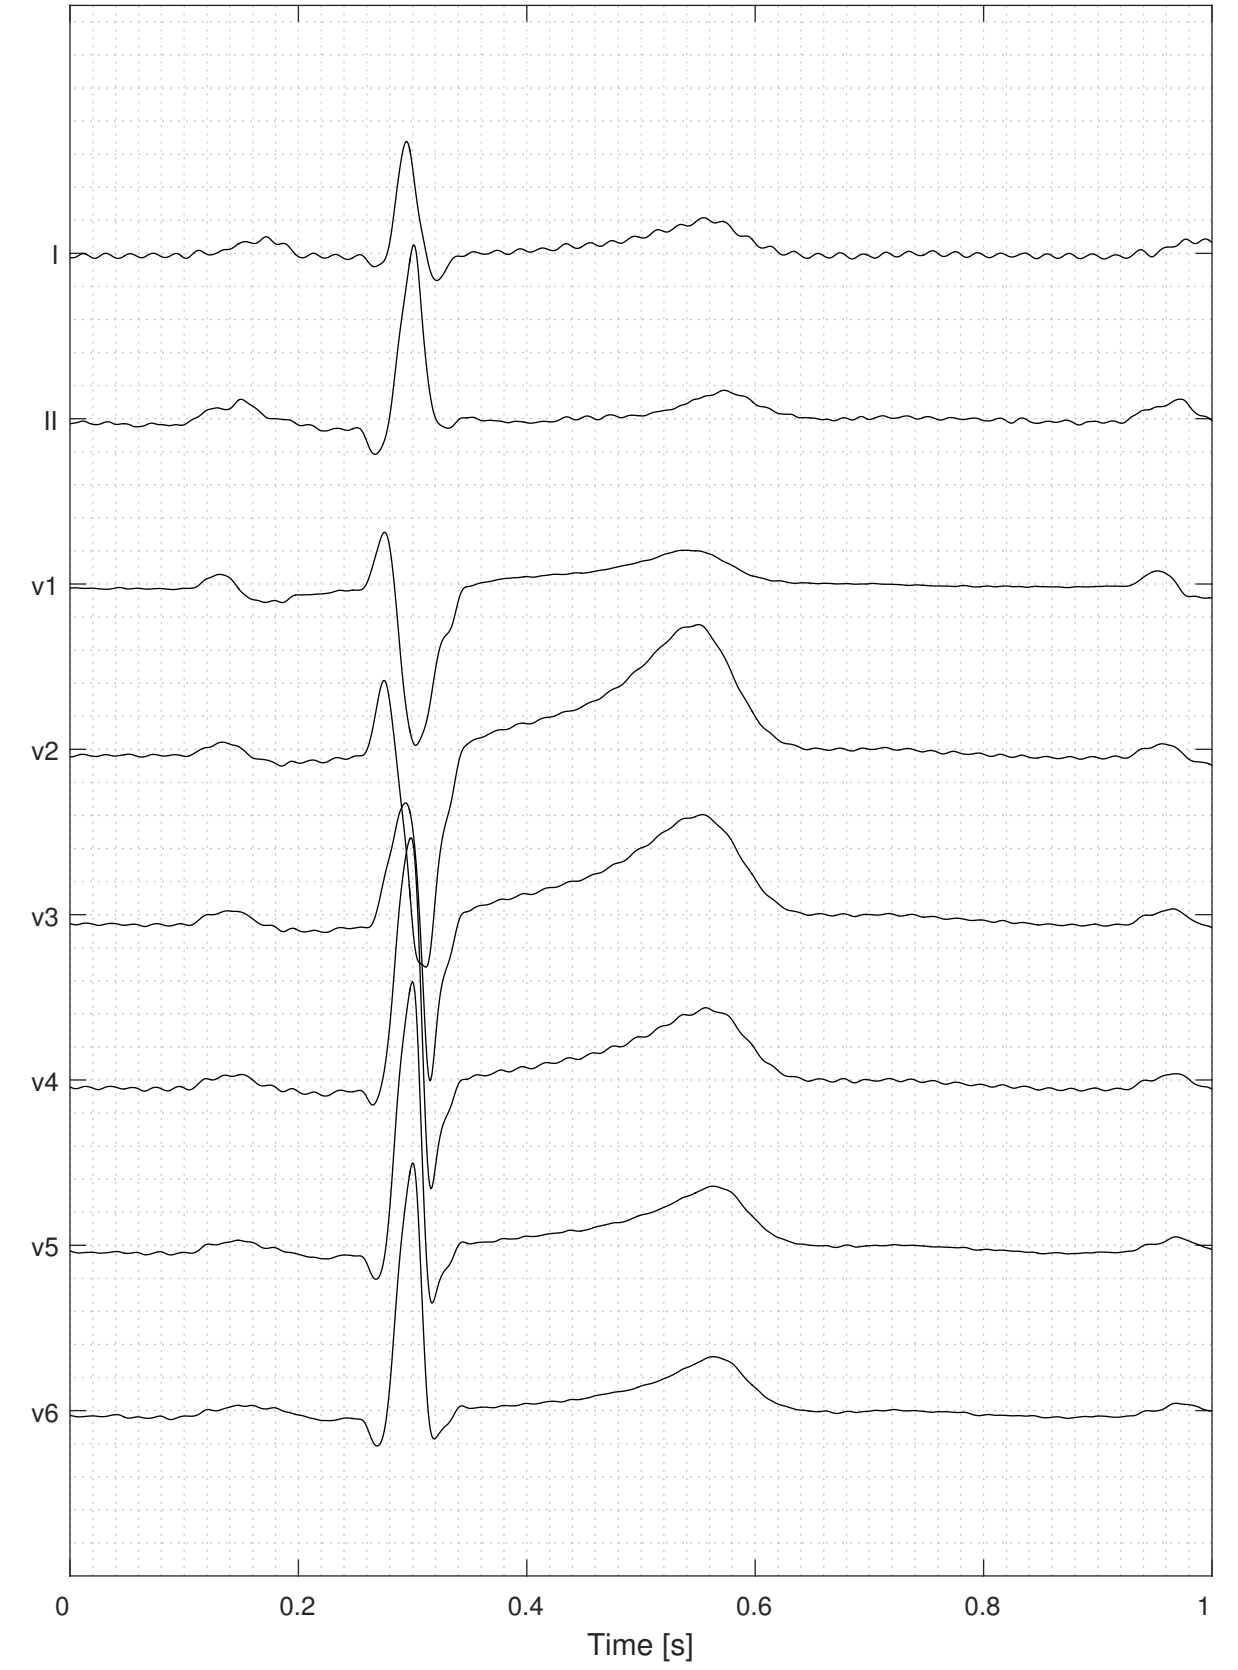

Patient 86

Low RR, Complex #: 108

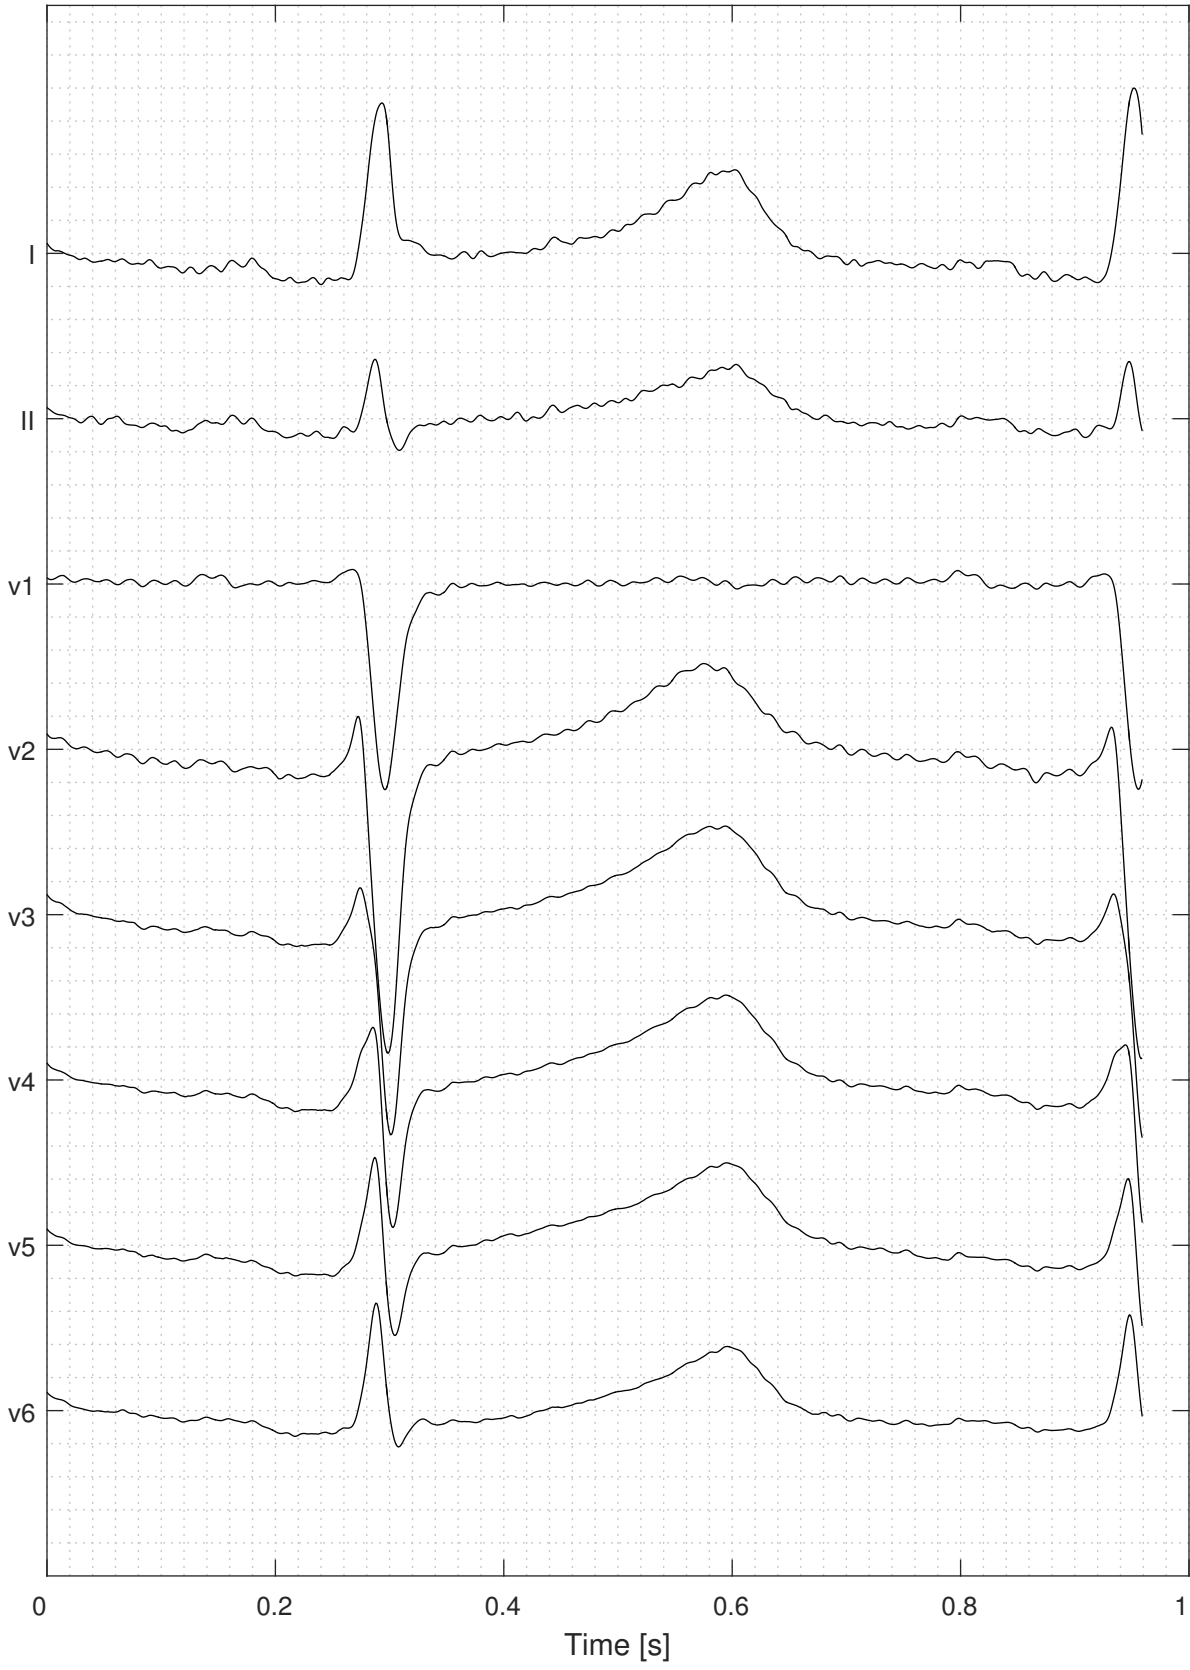

Mid RR, Complex #: 216

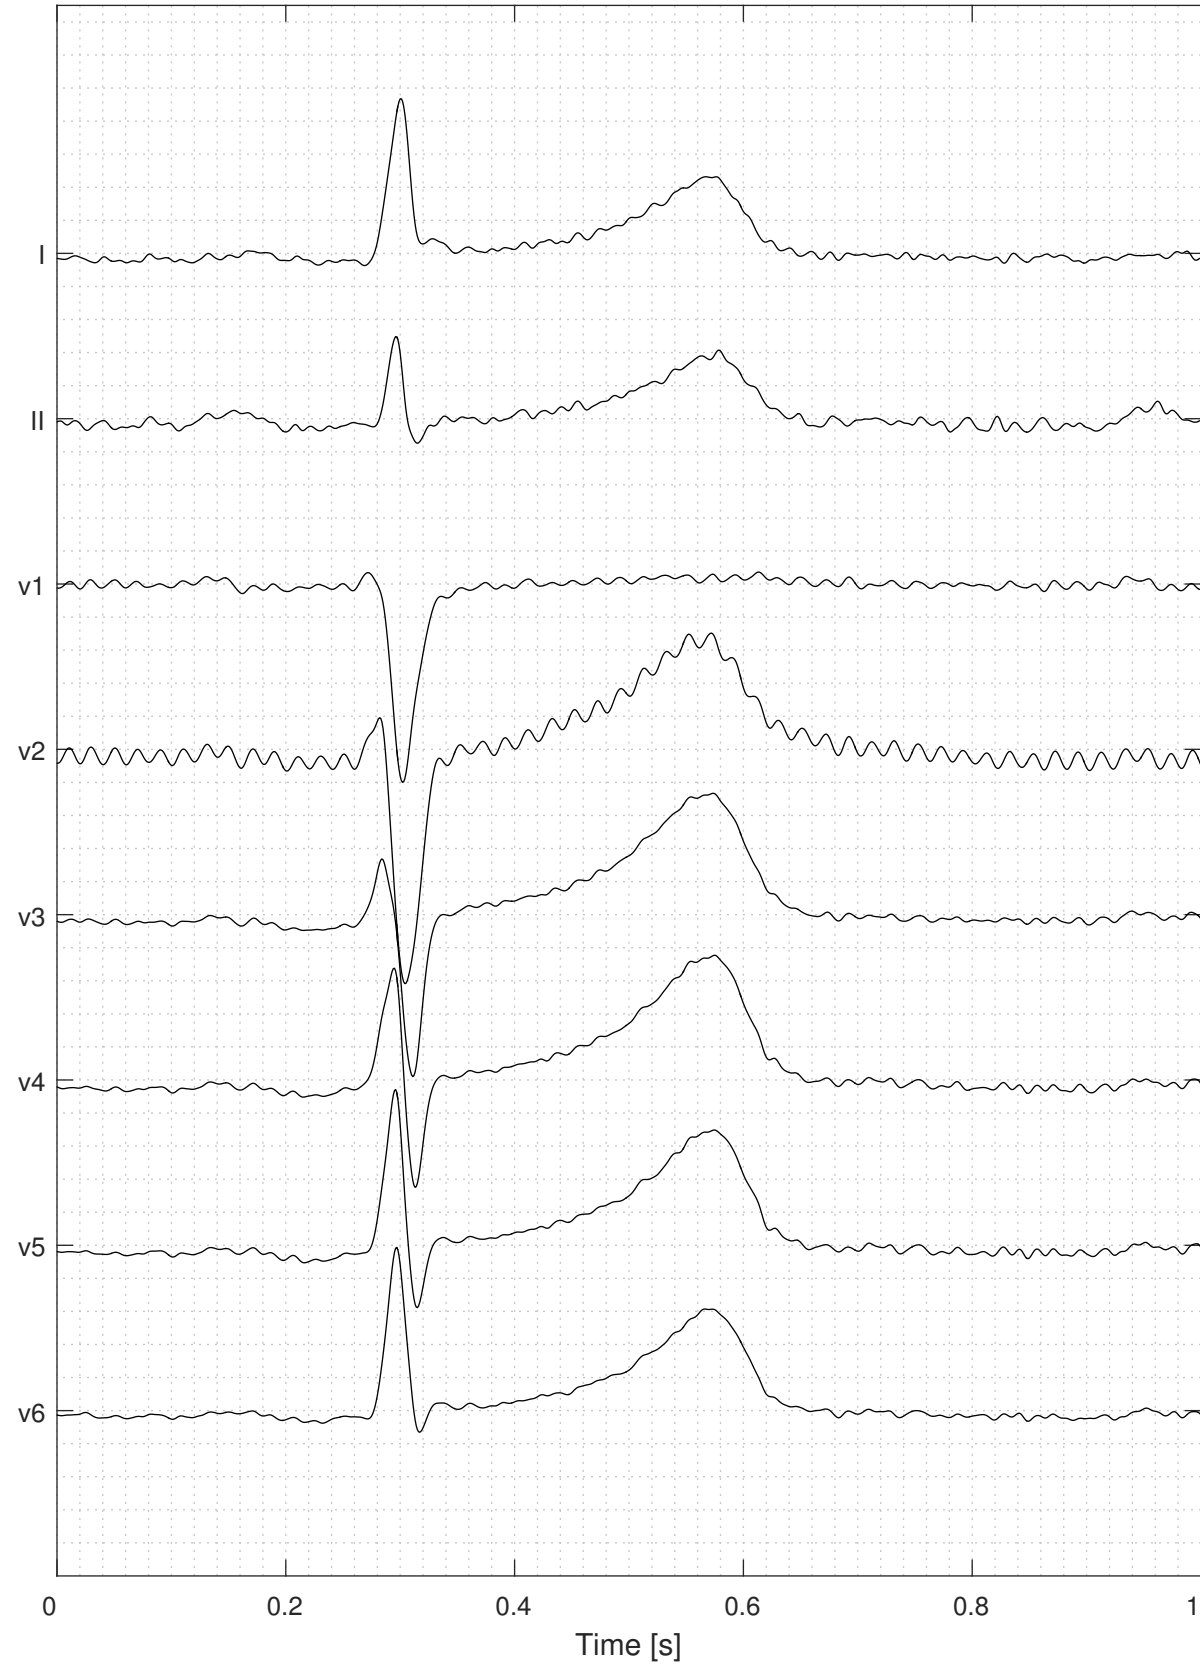

High RR, Complex #: 53

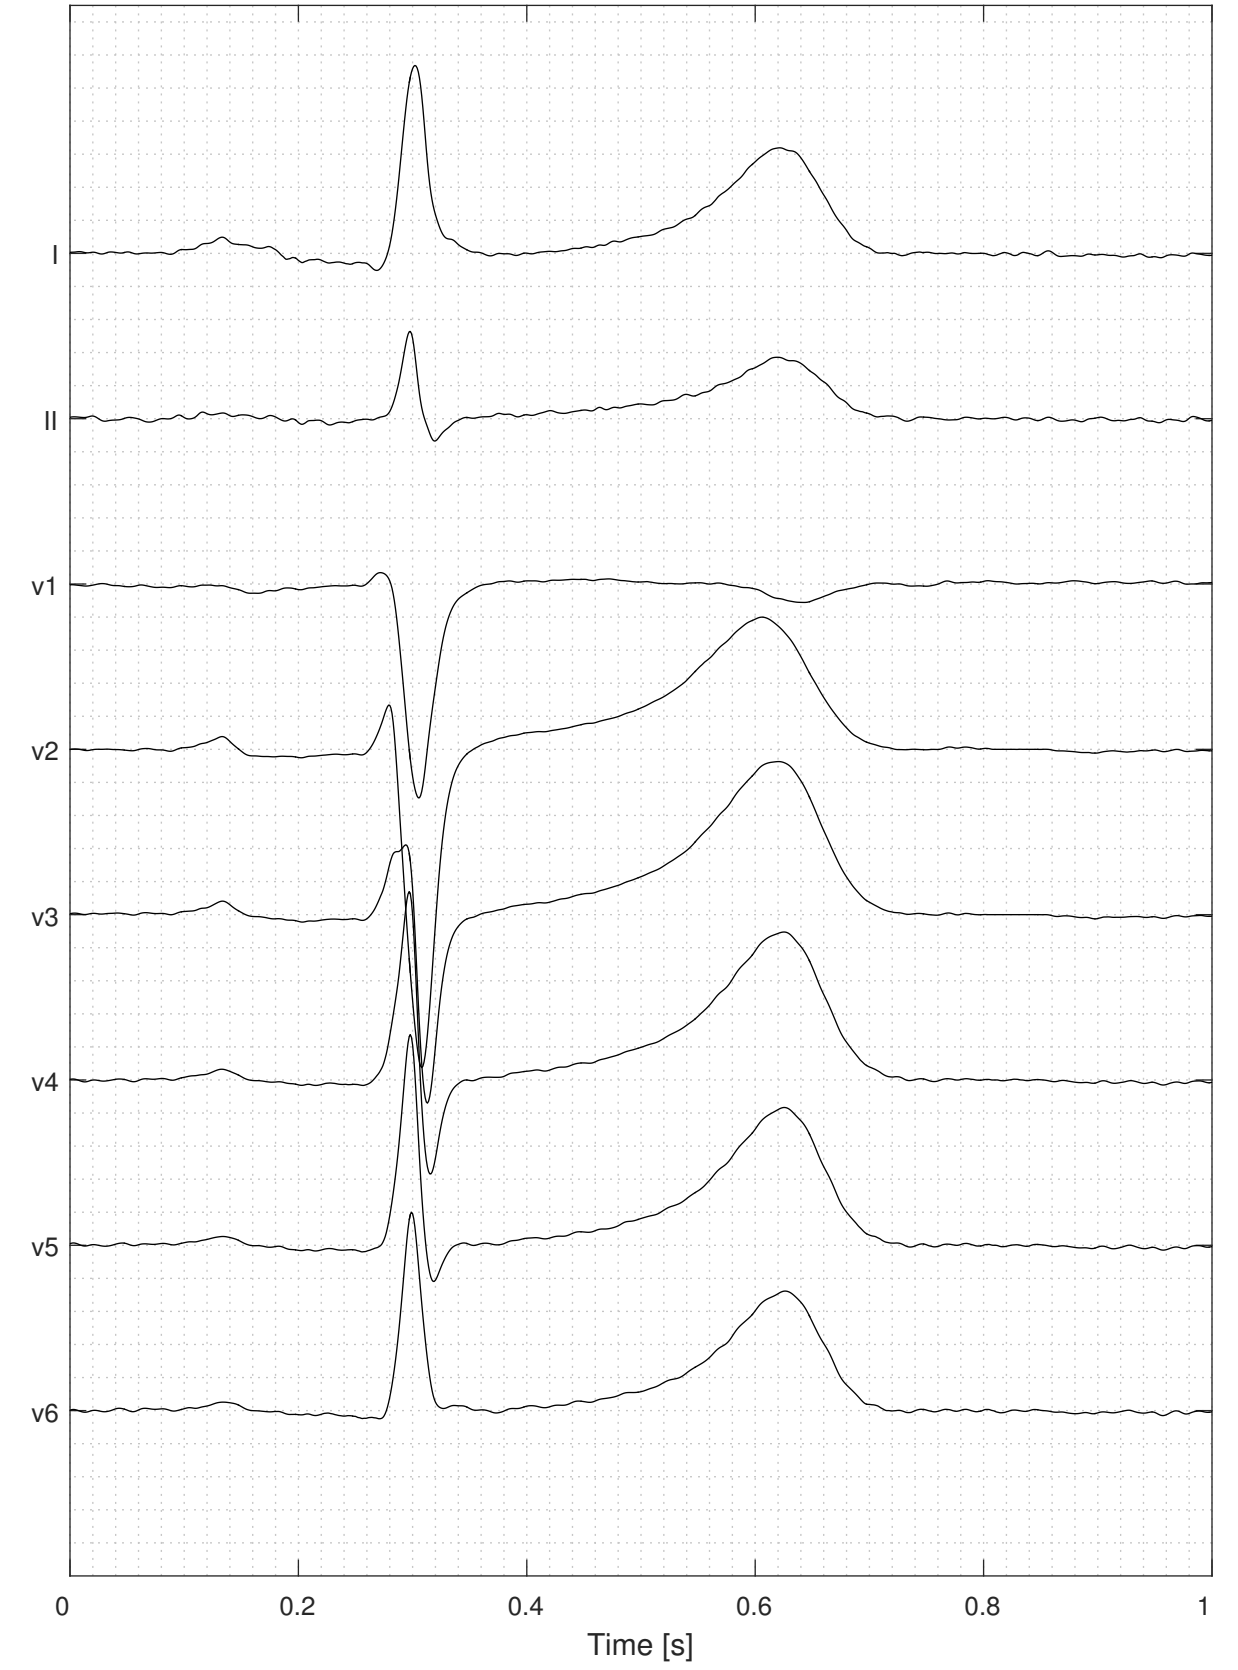

Patient 87

Low RR, Complex #: 136

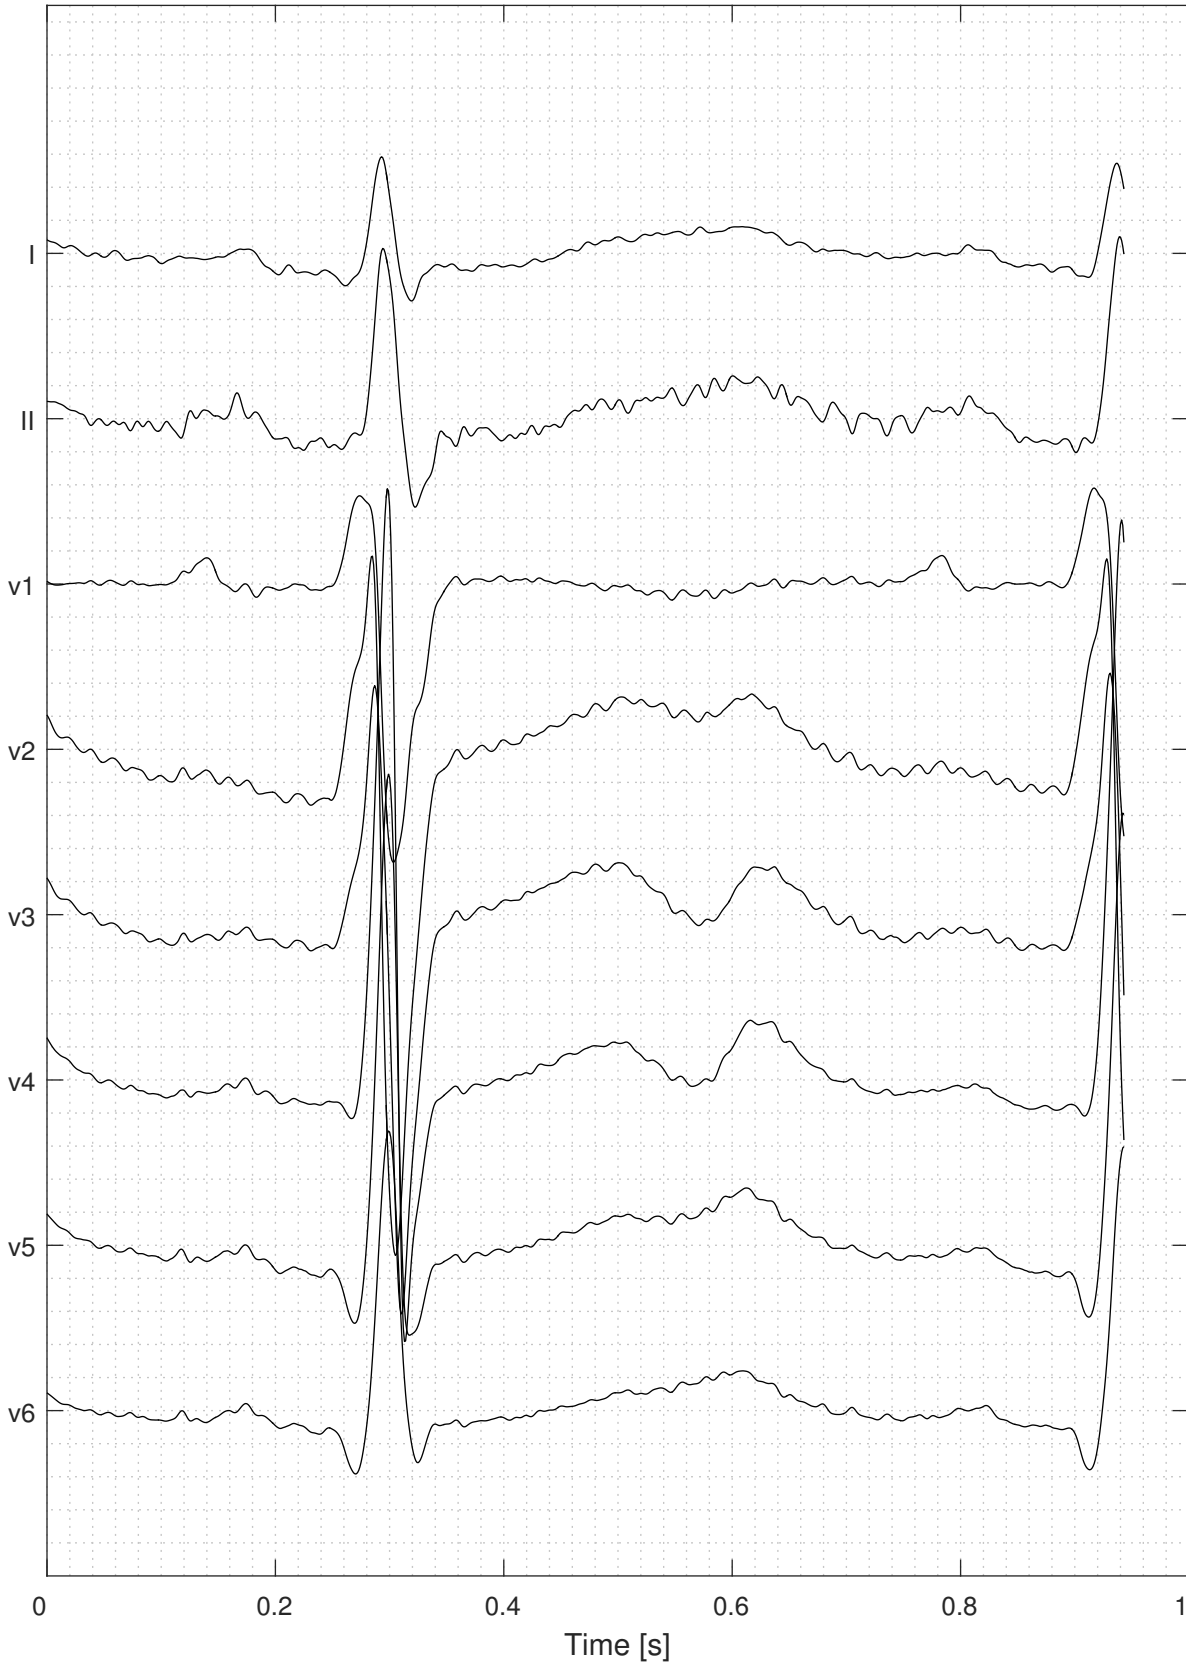

Mid RR, Complex #: 162

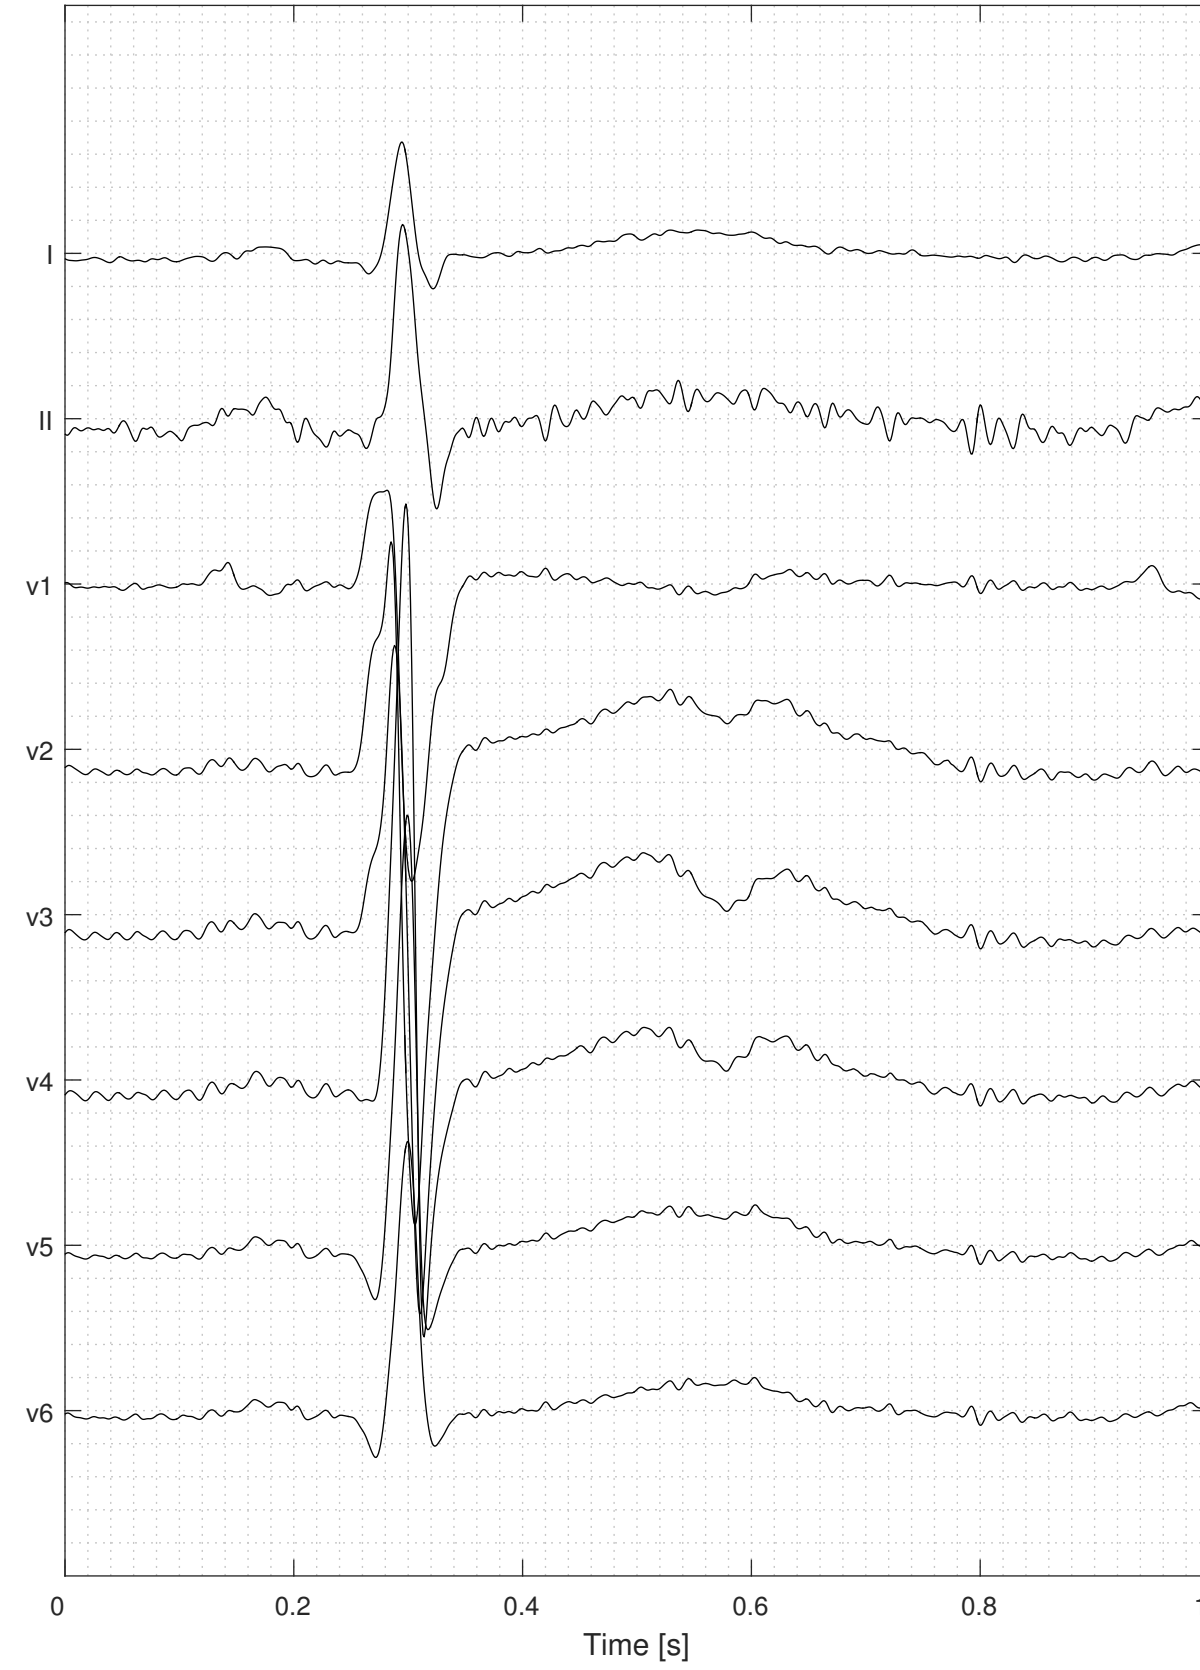

High RR, Complex #: 11

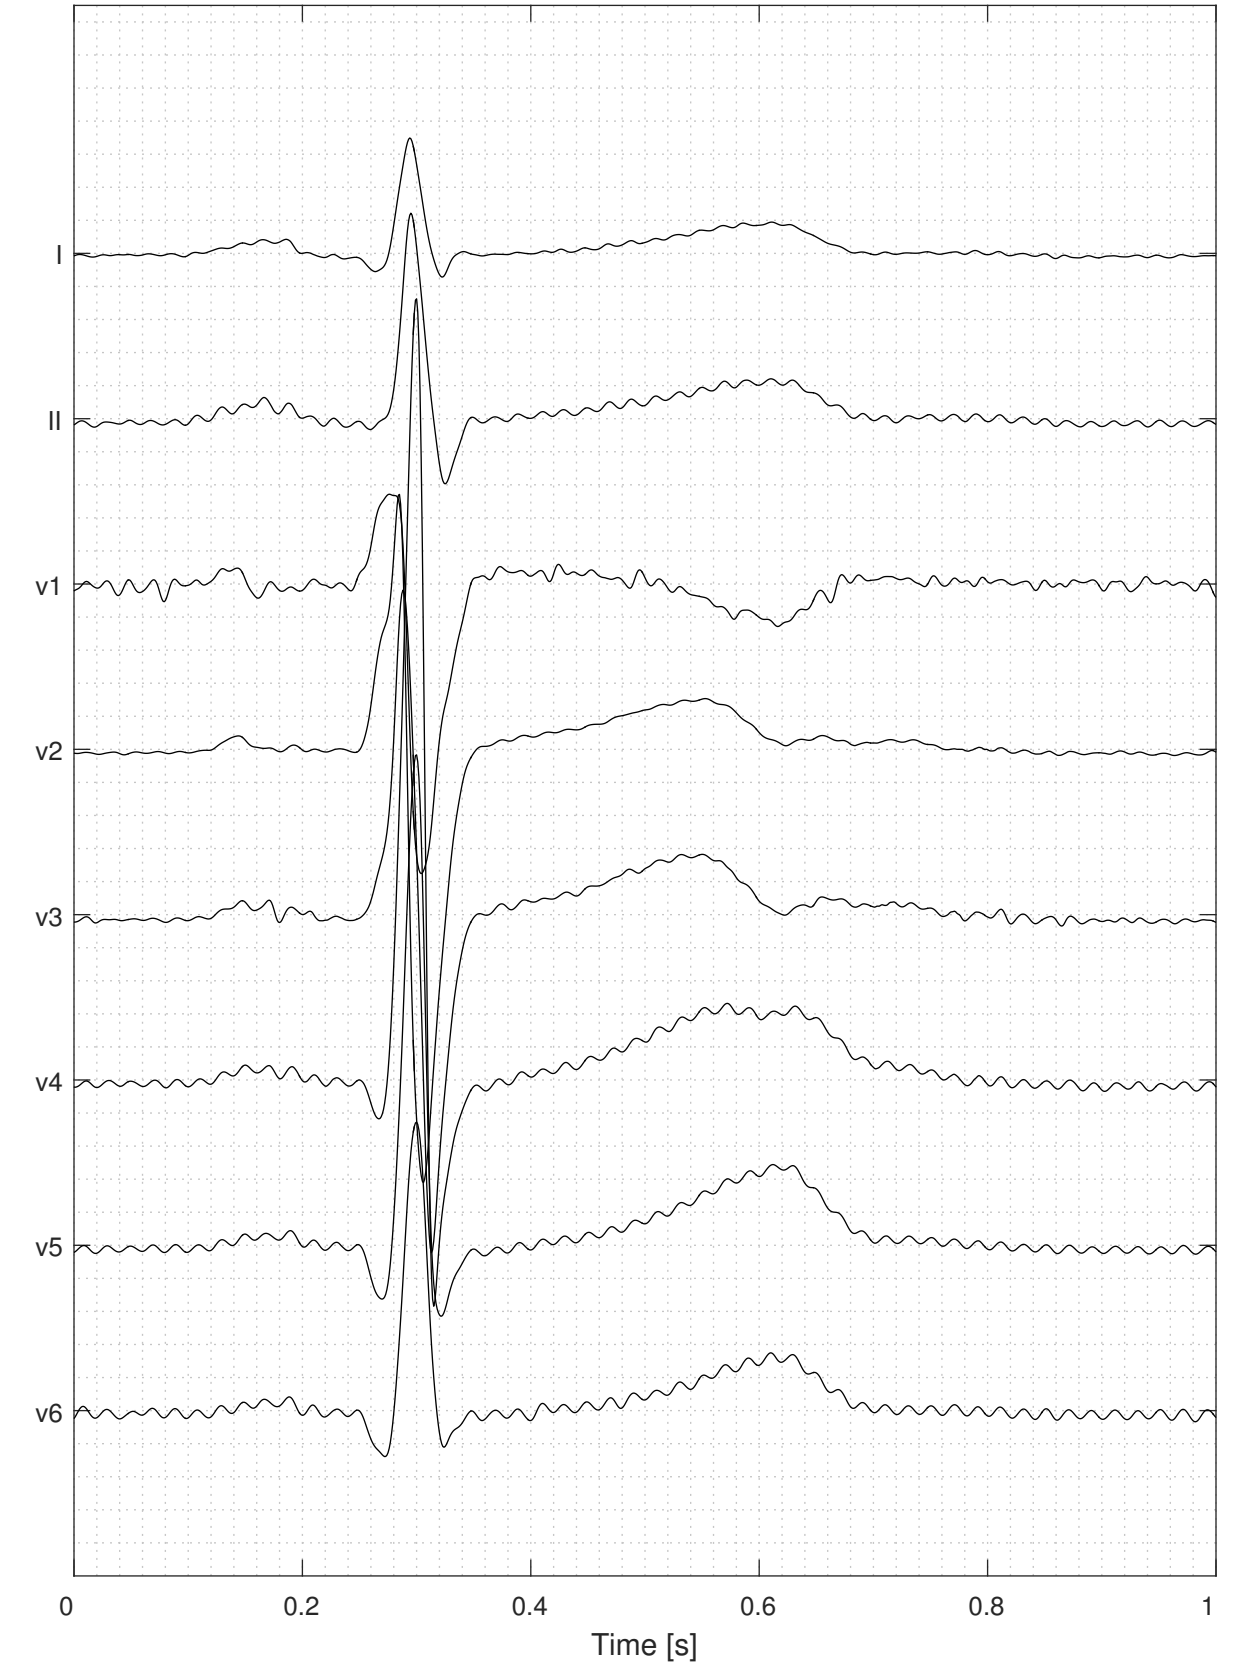

Patient 88

Low RR, Complex #: 232

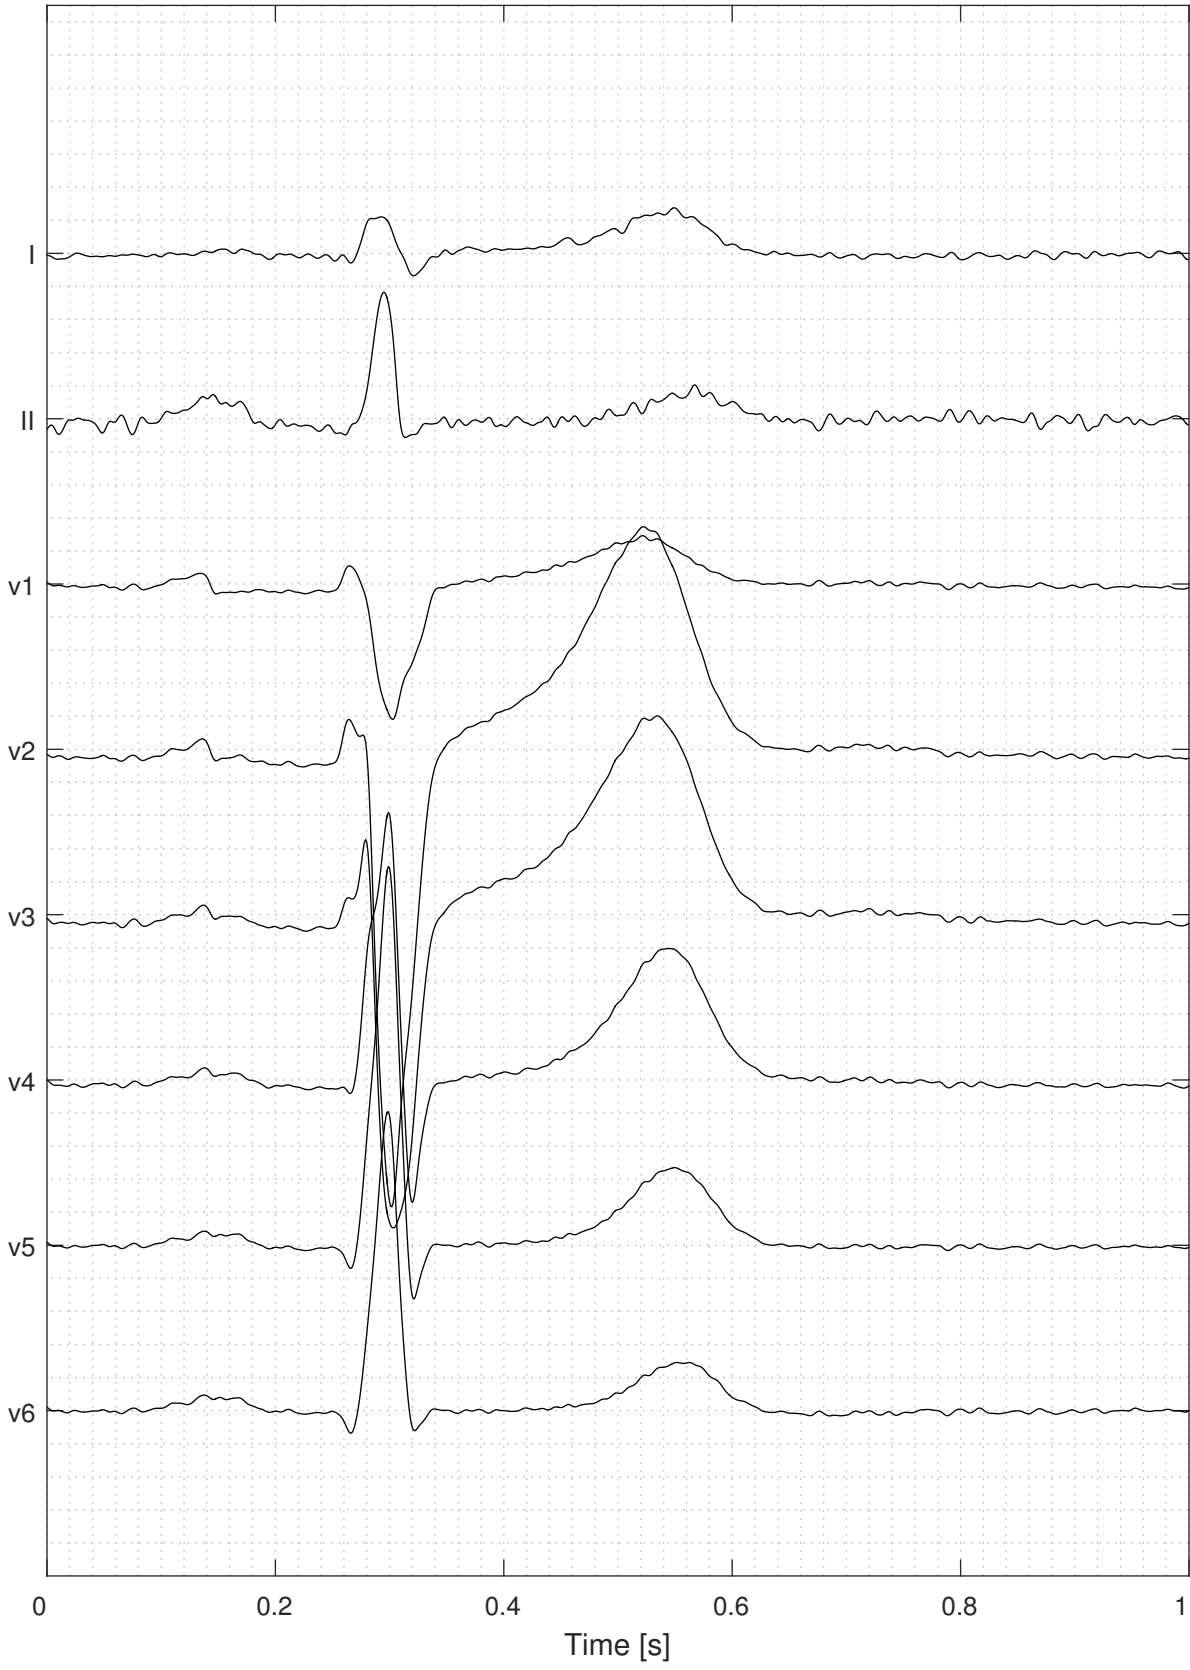

Mid RR, Complex #: 295

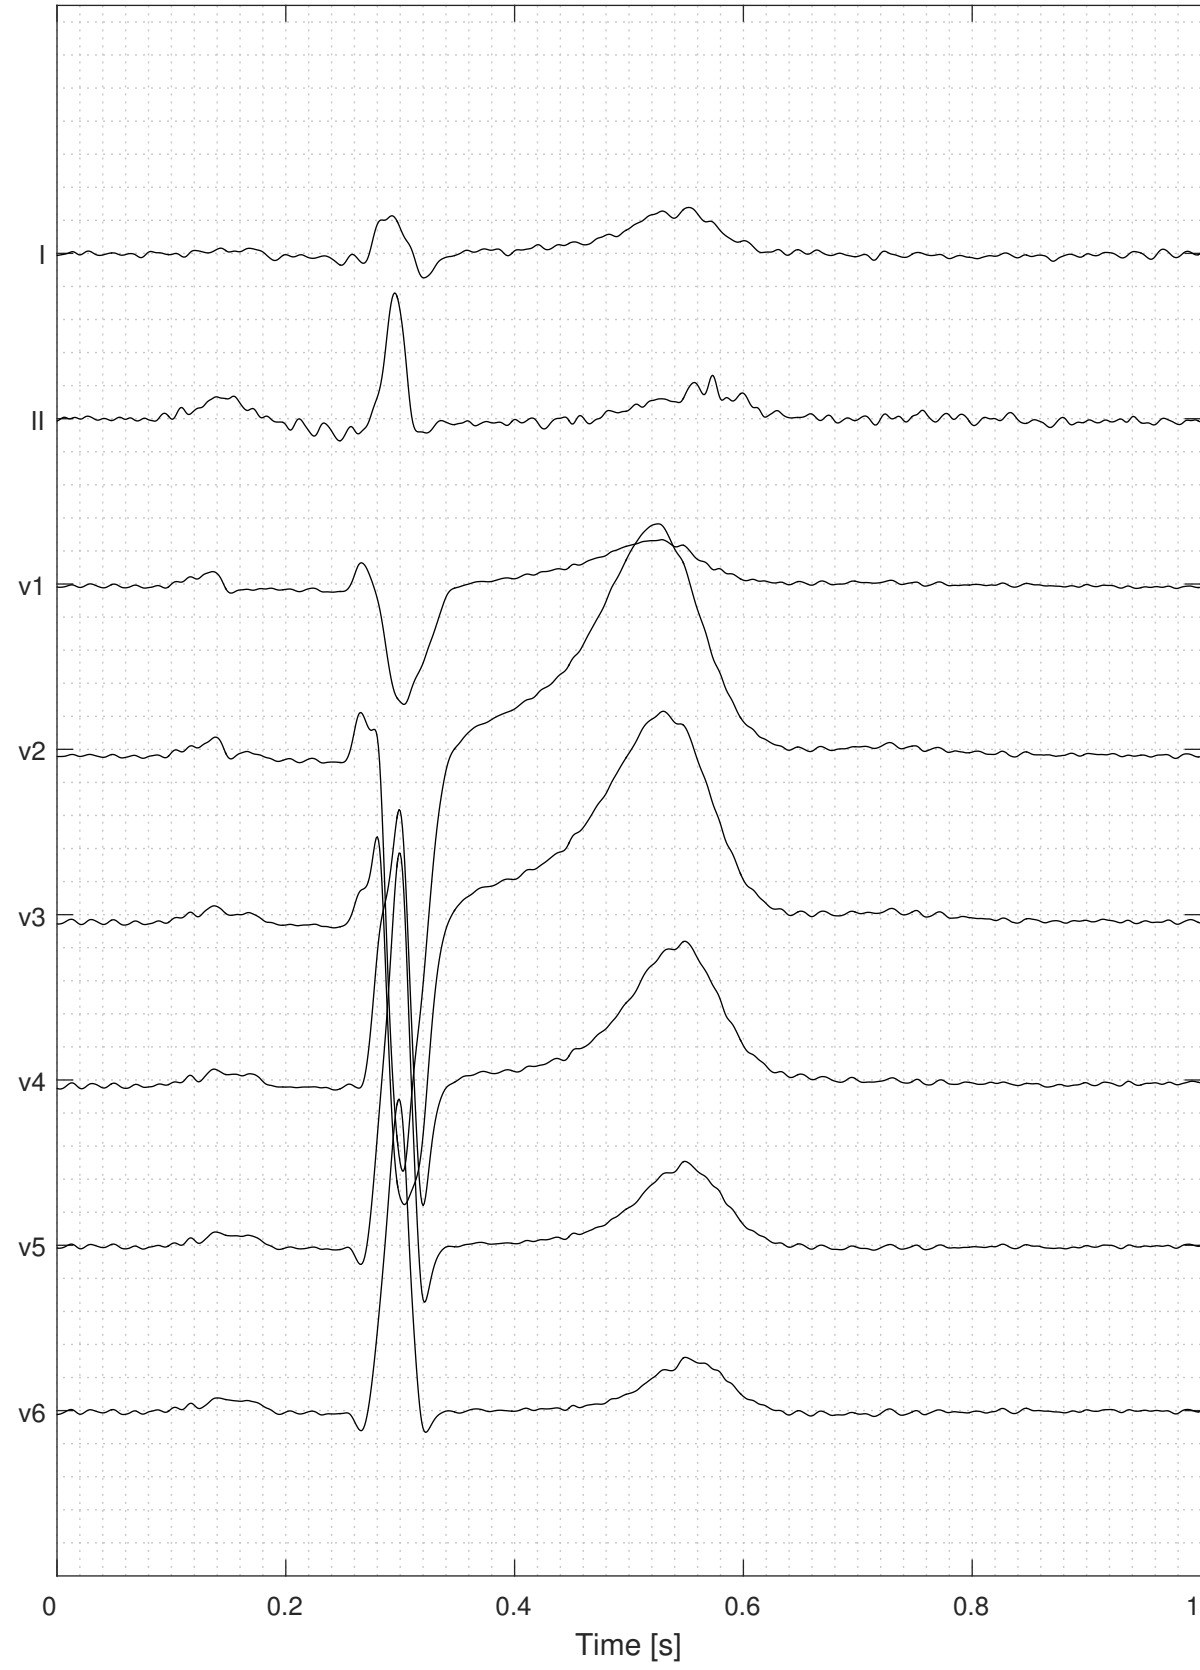

High RR, Complex #: 58

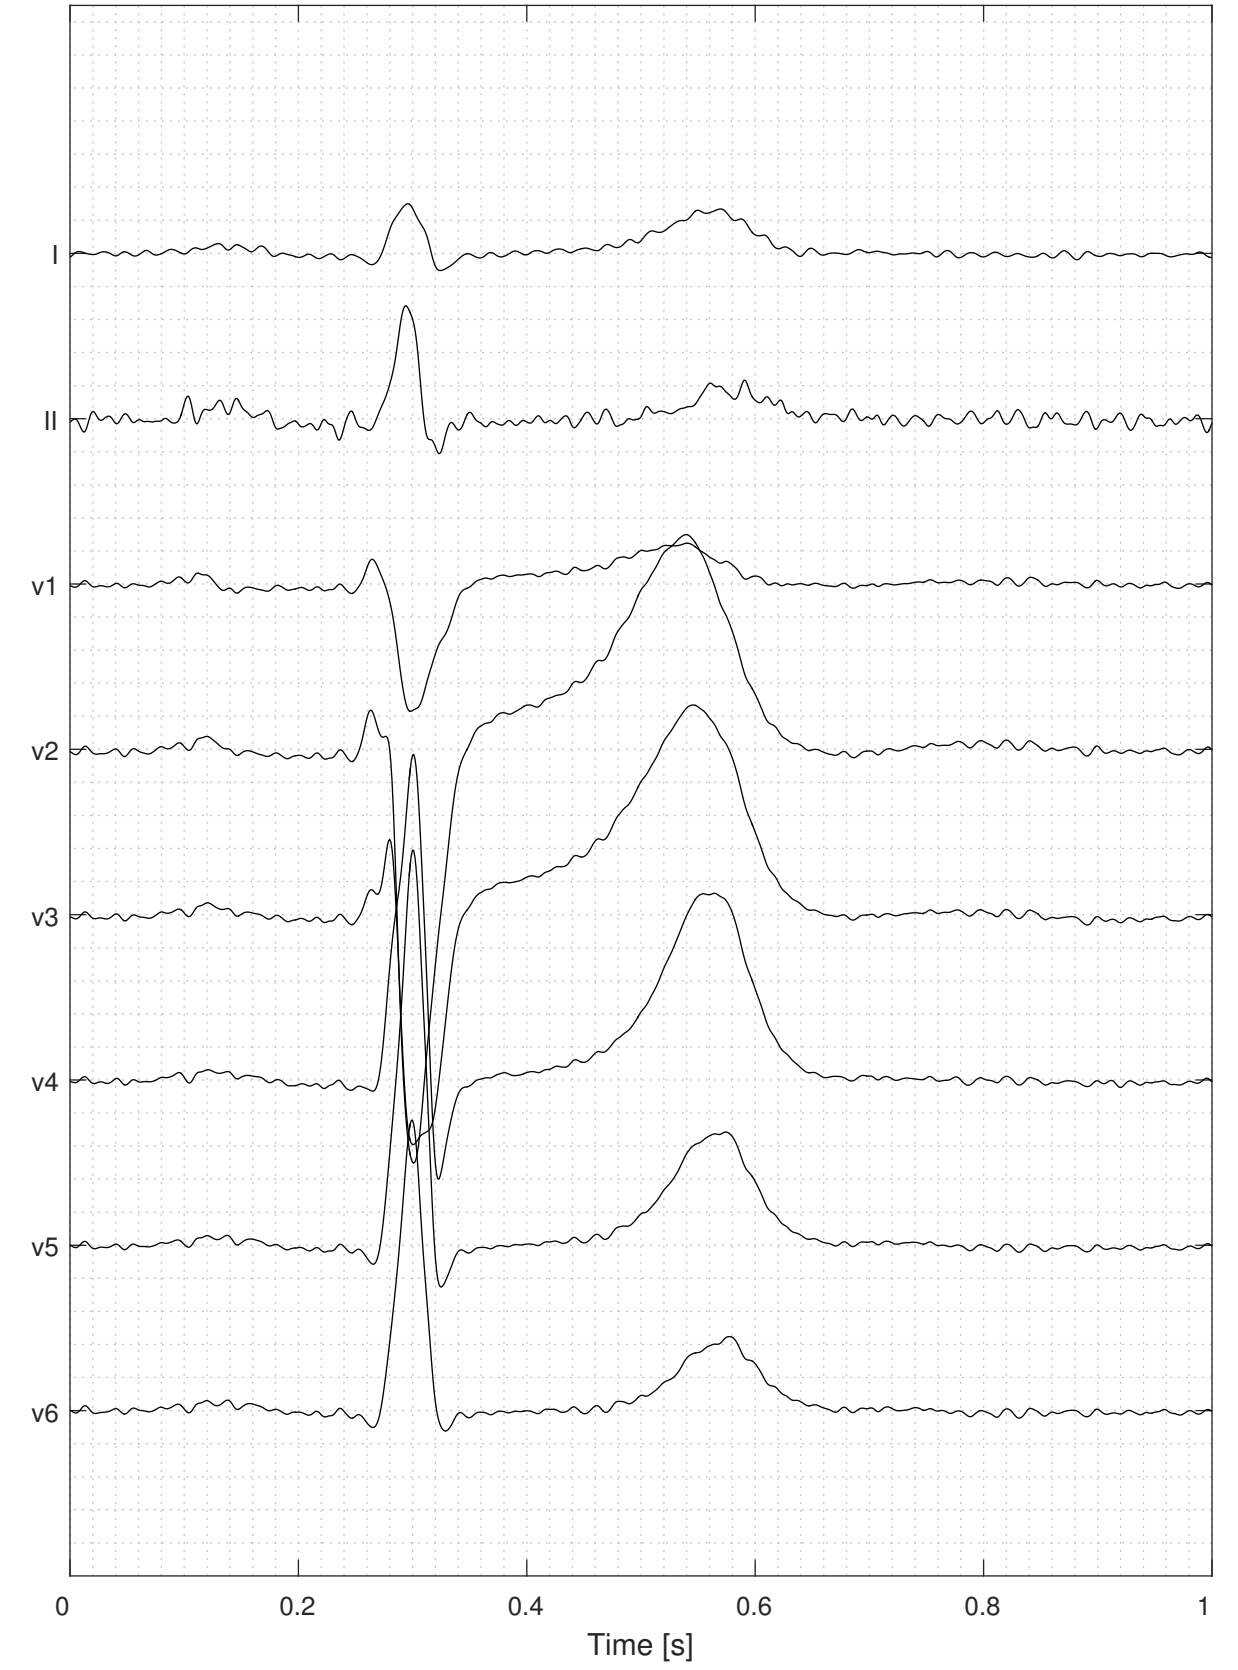



Patient 89

Low RR, Complex #: 150

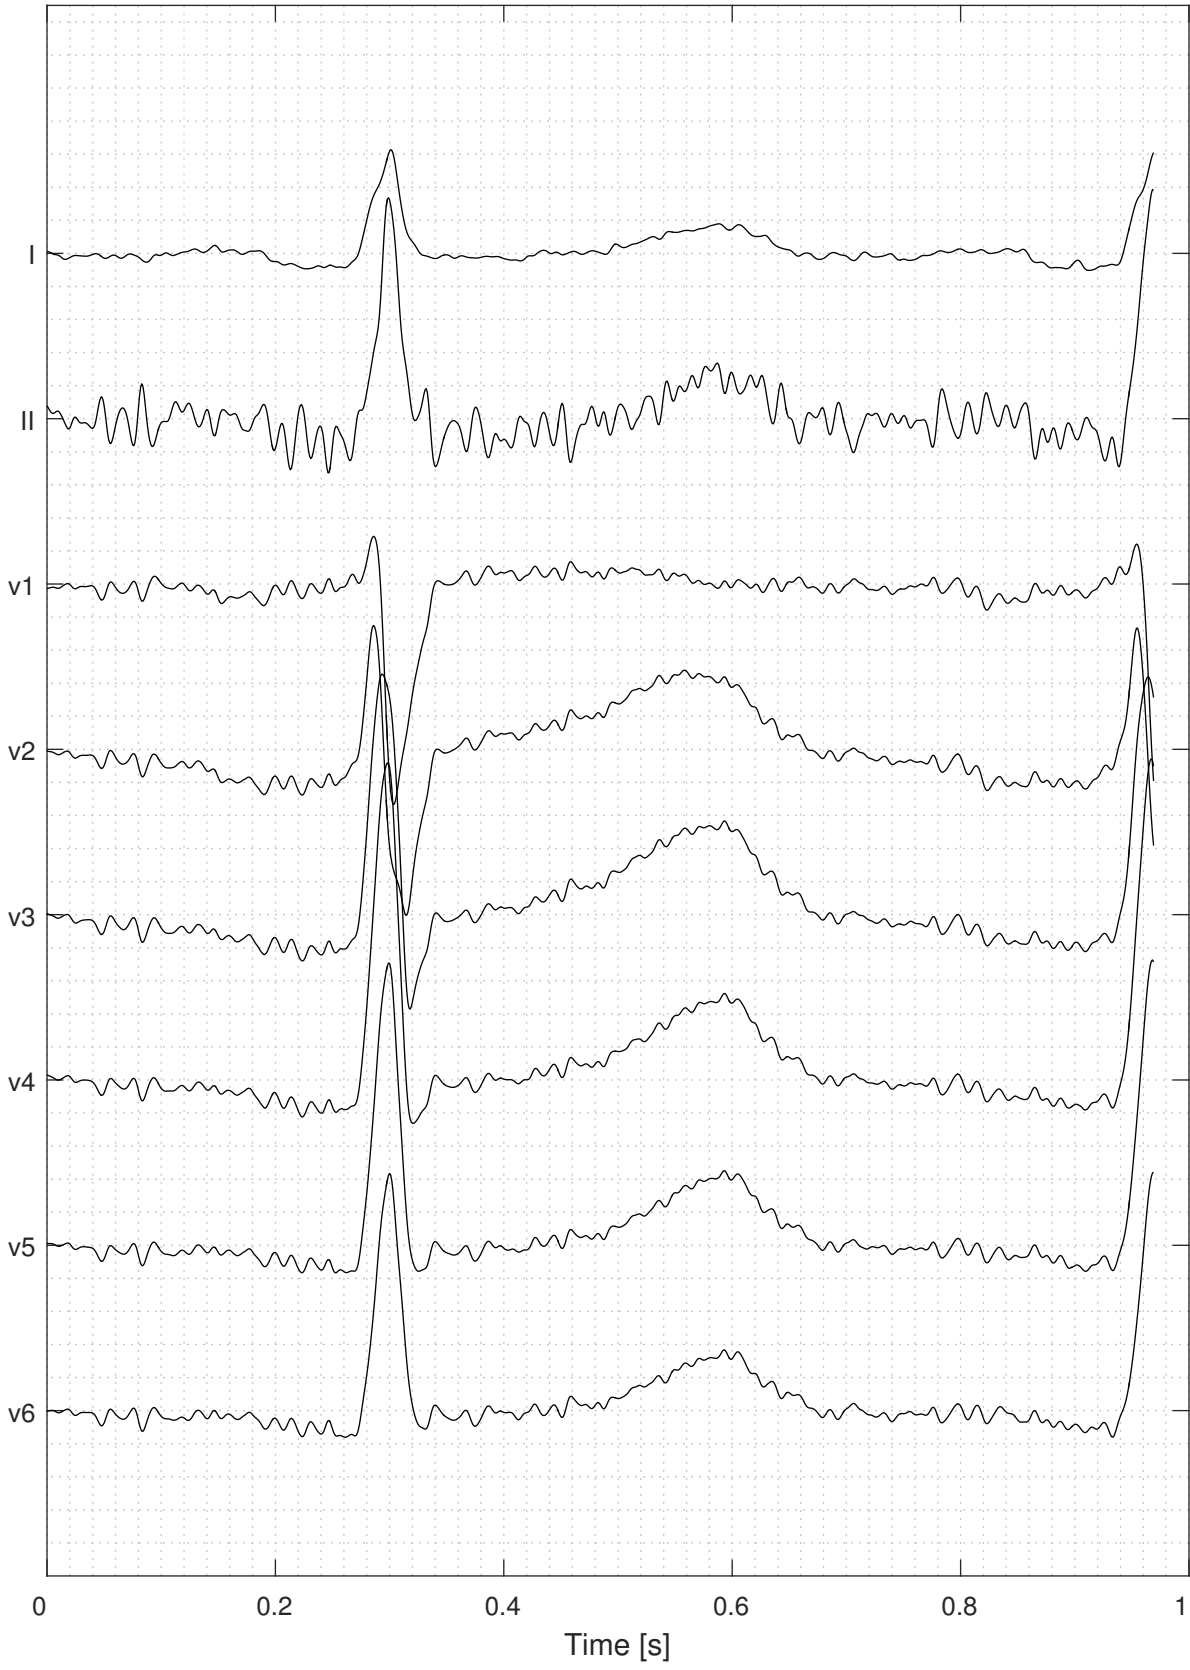

Mid RR, Complex #: 117

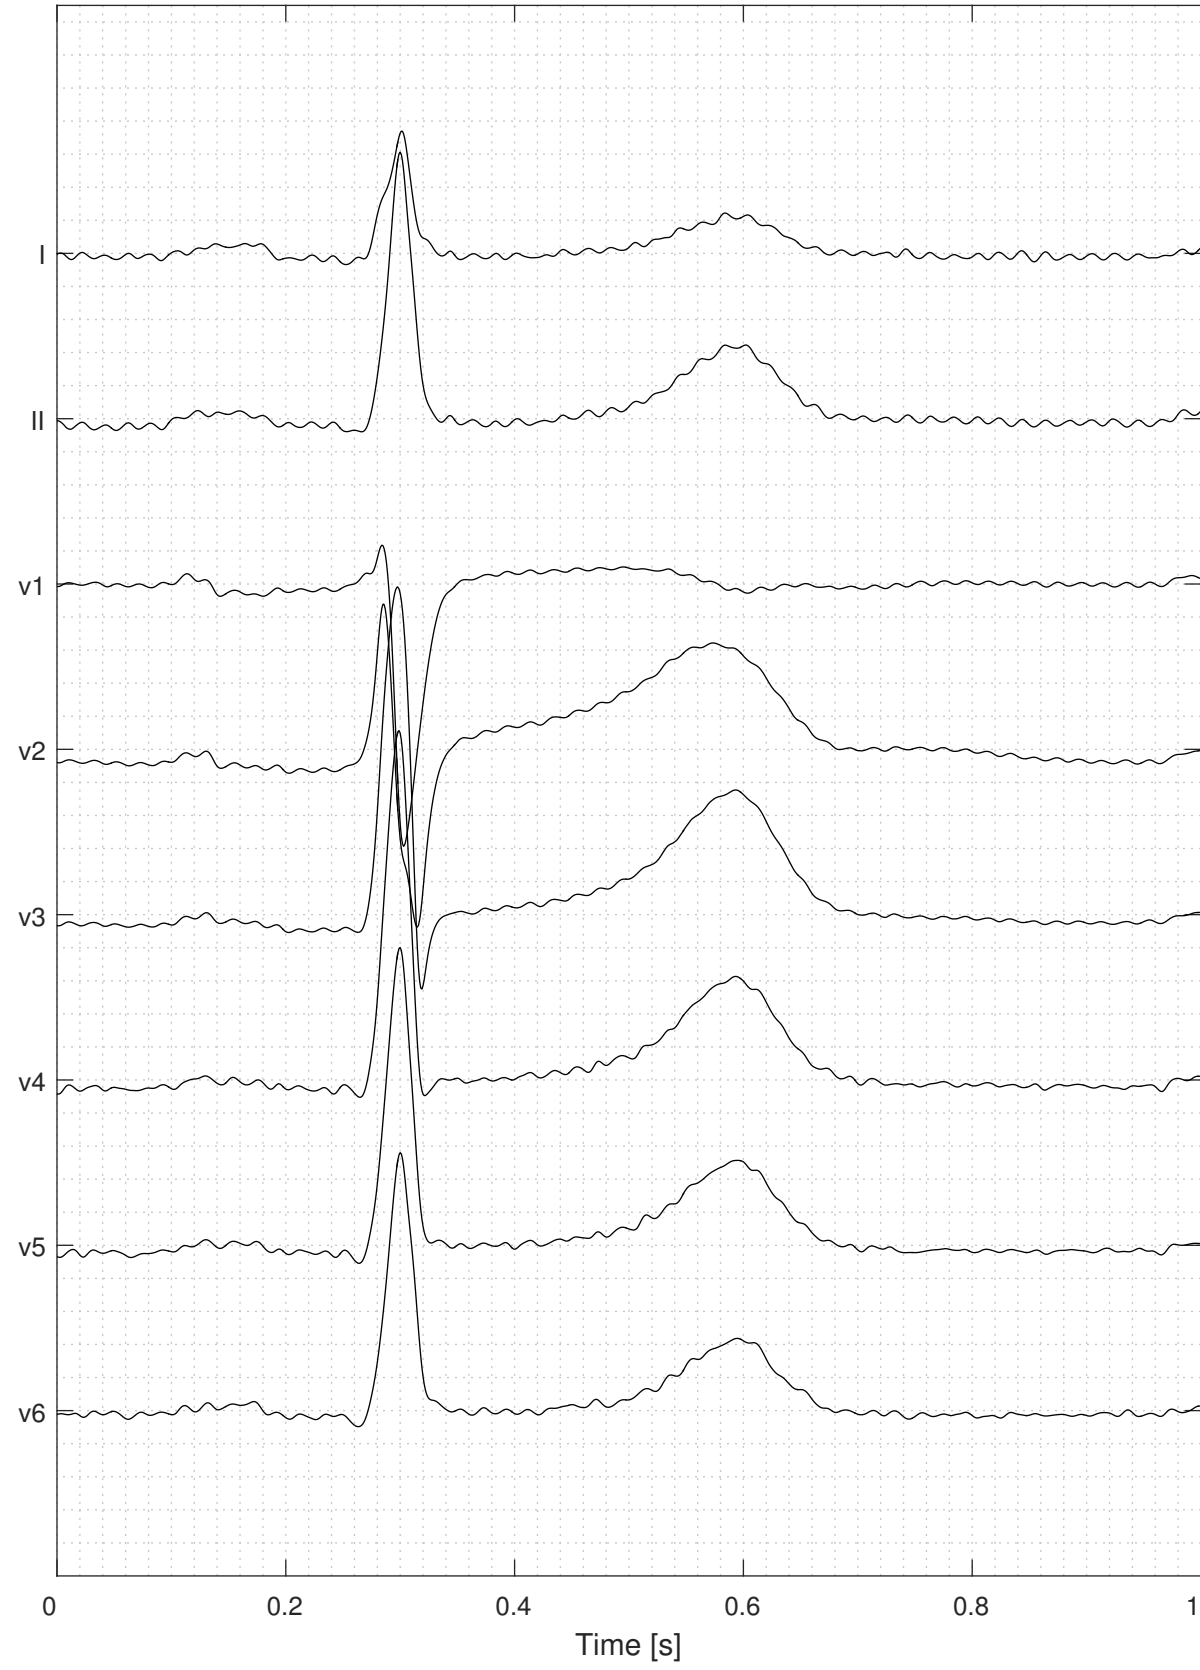

High RR, Complex #: 65

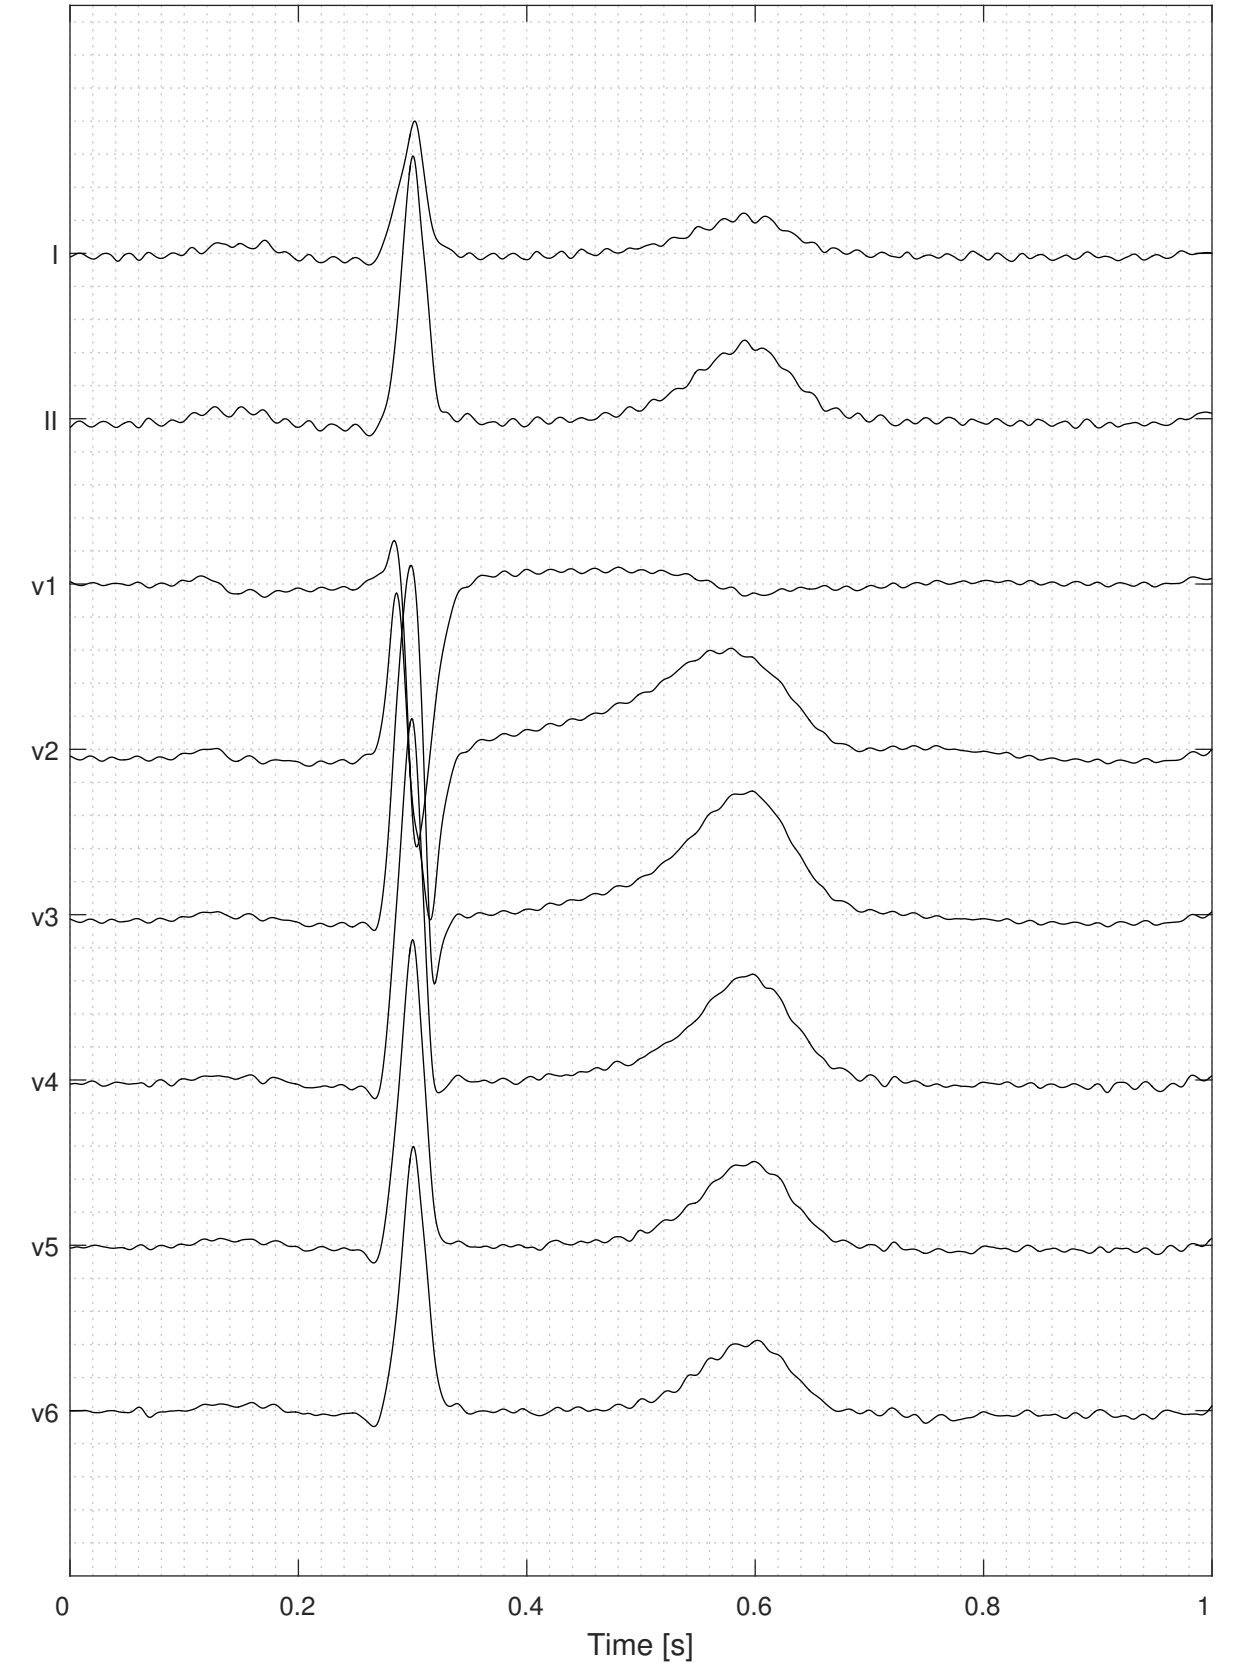

Patient 90

Low RR, Complex #: 296

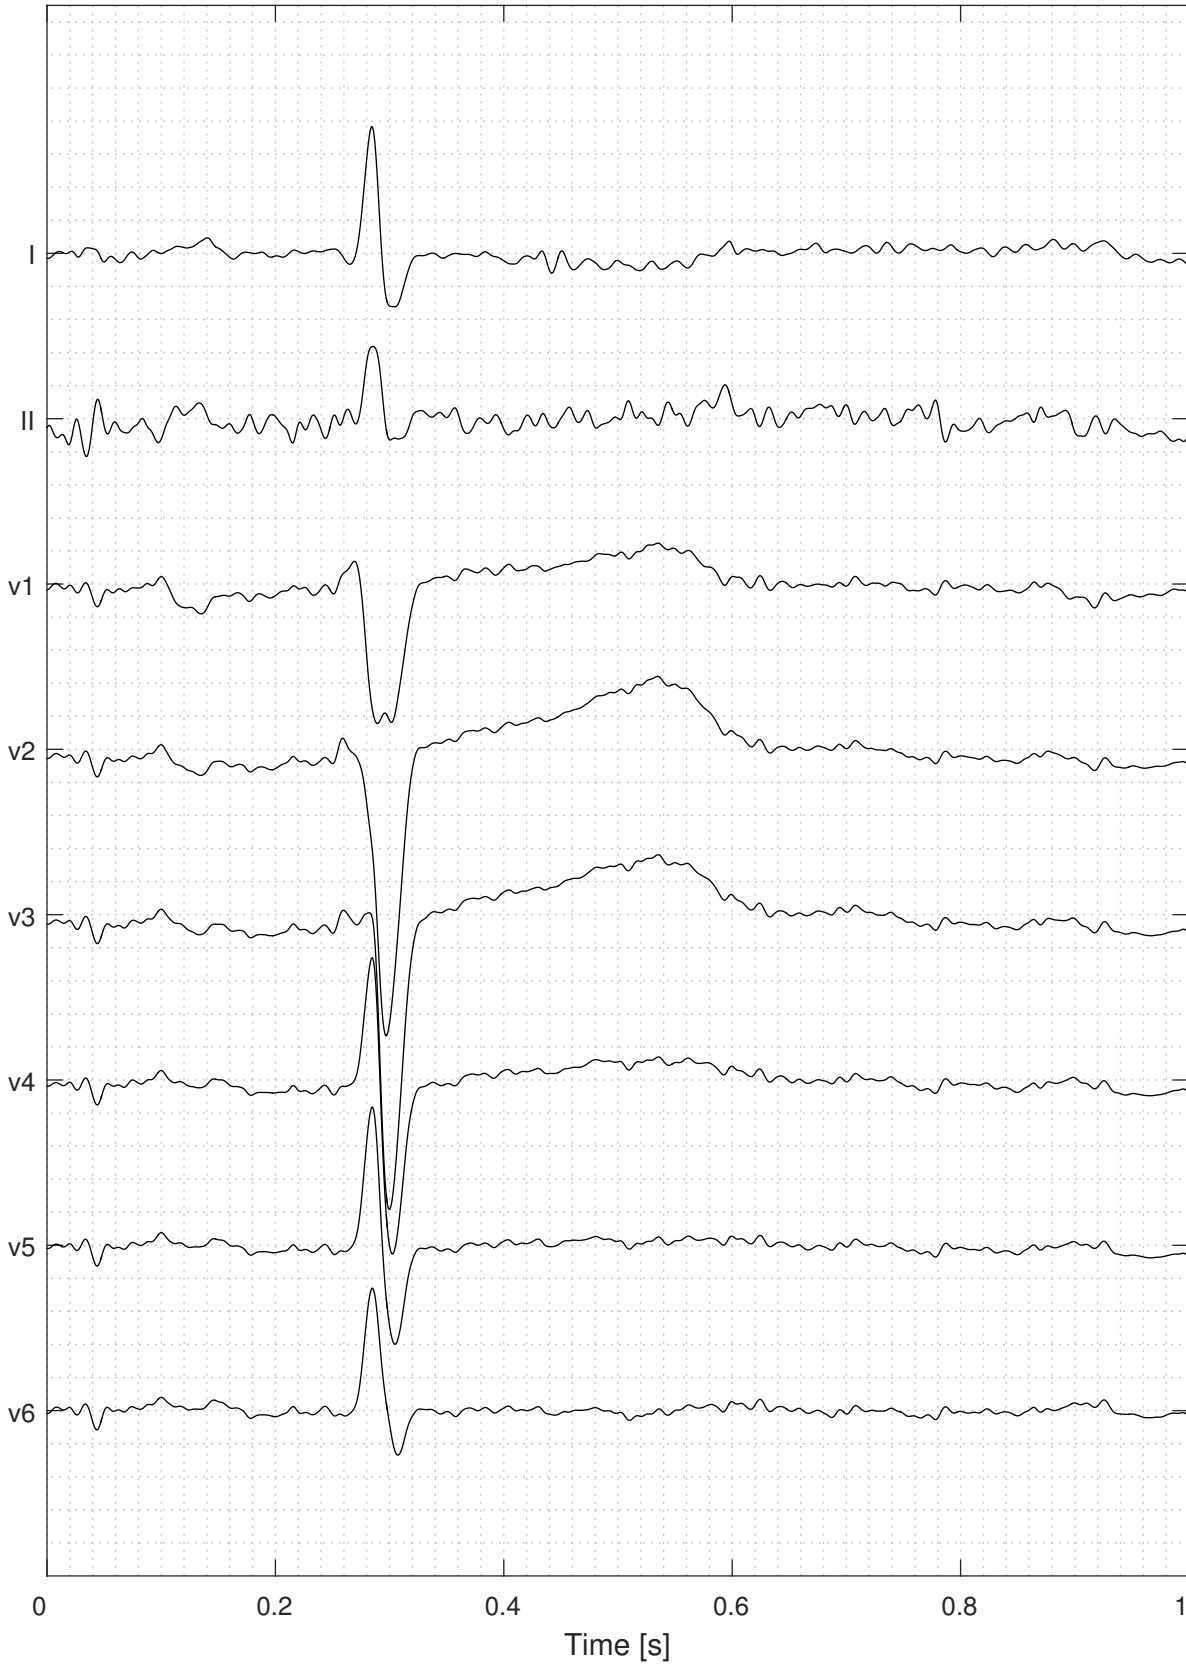

Mid RR, Complex #: 150

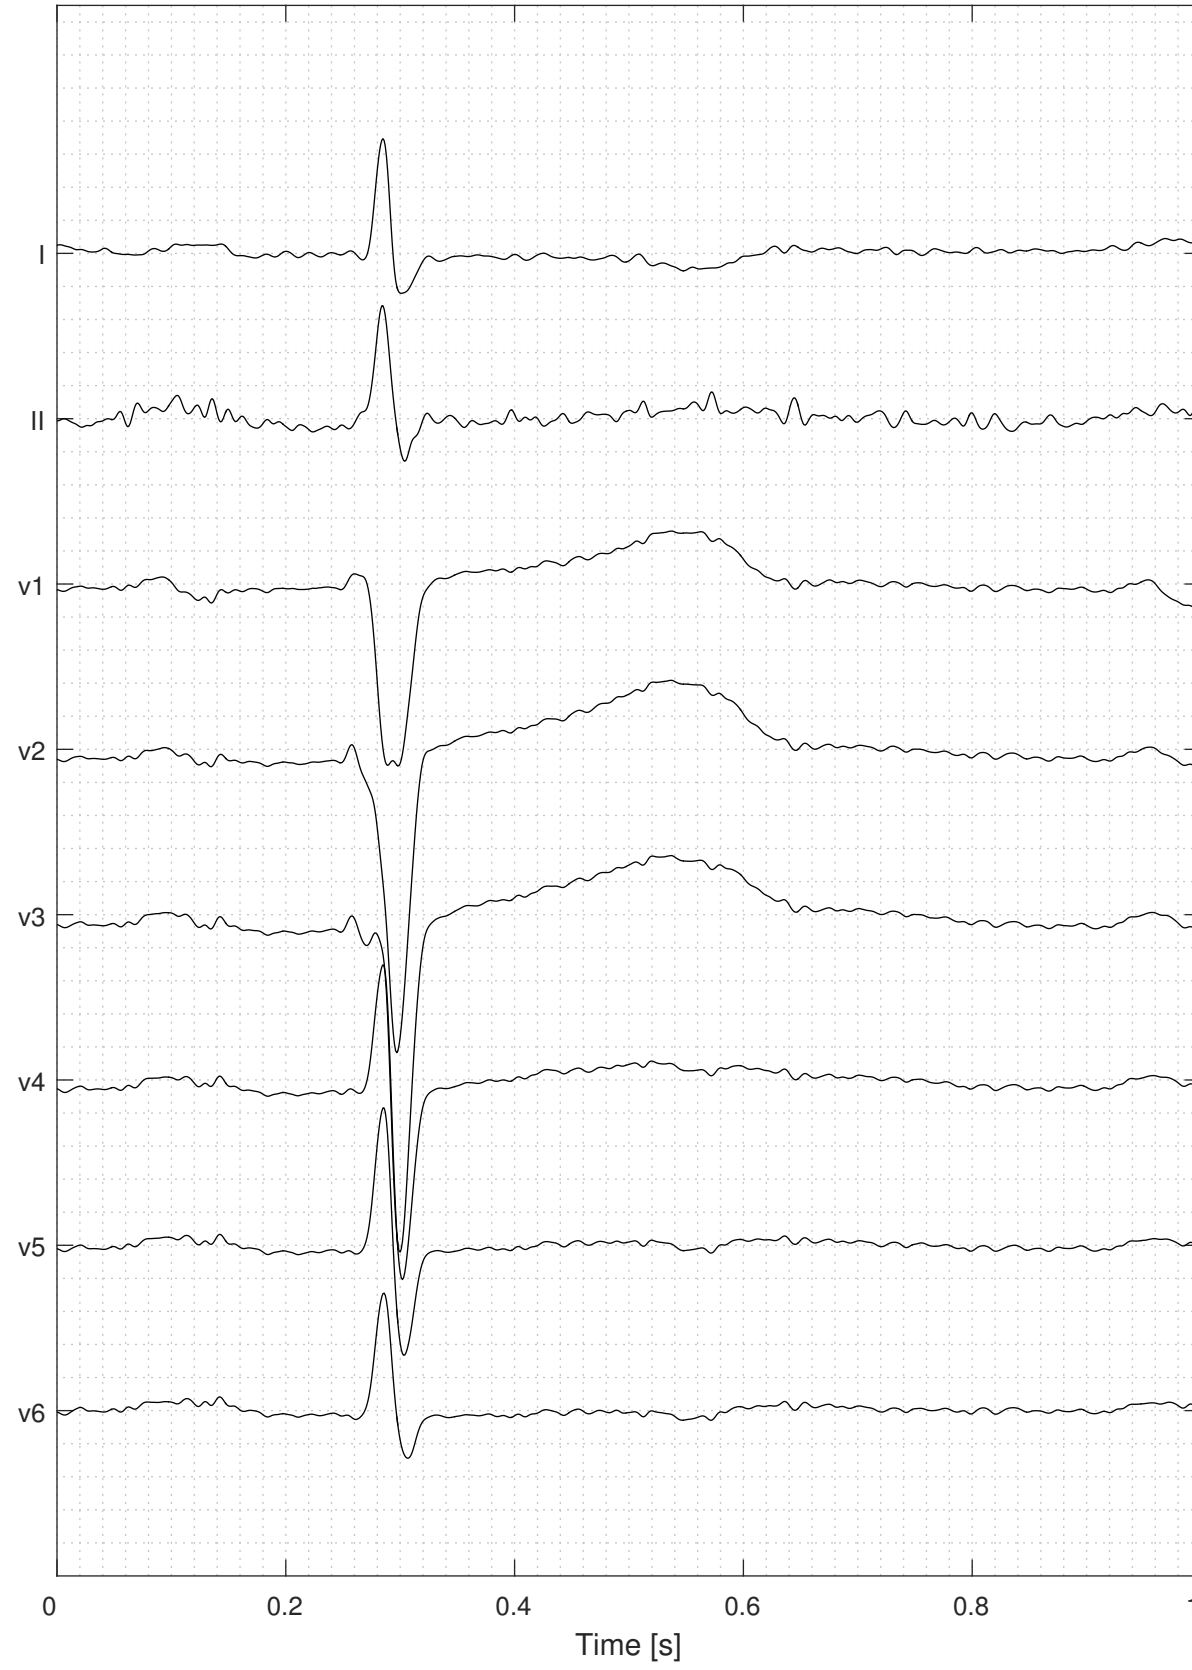

High RR, Complex #: 131

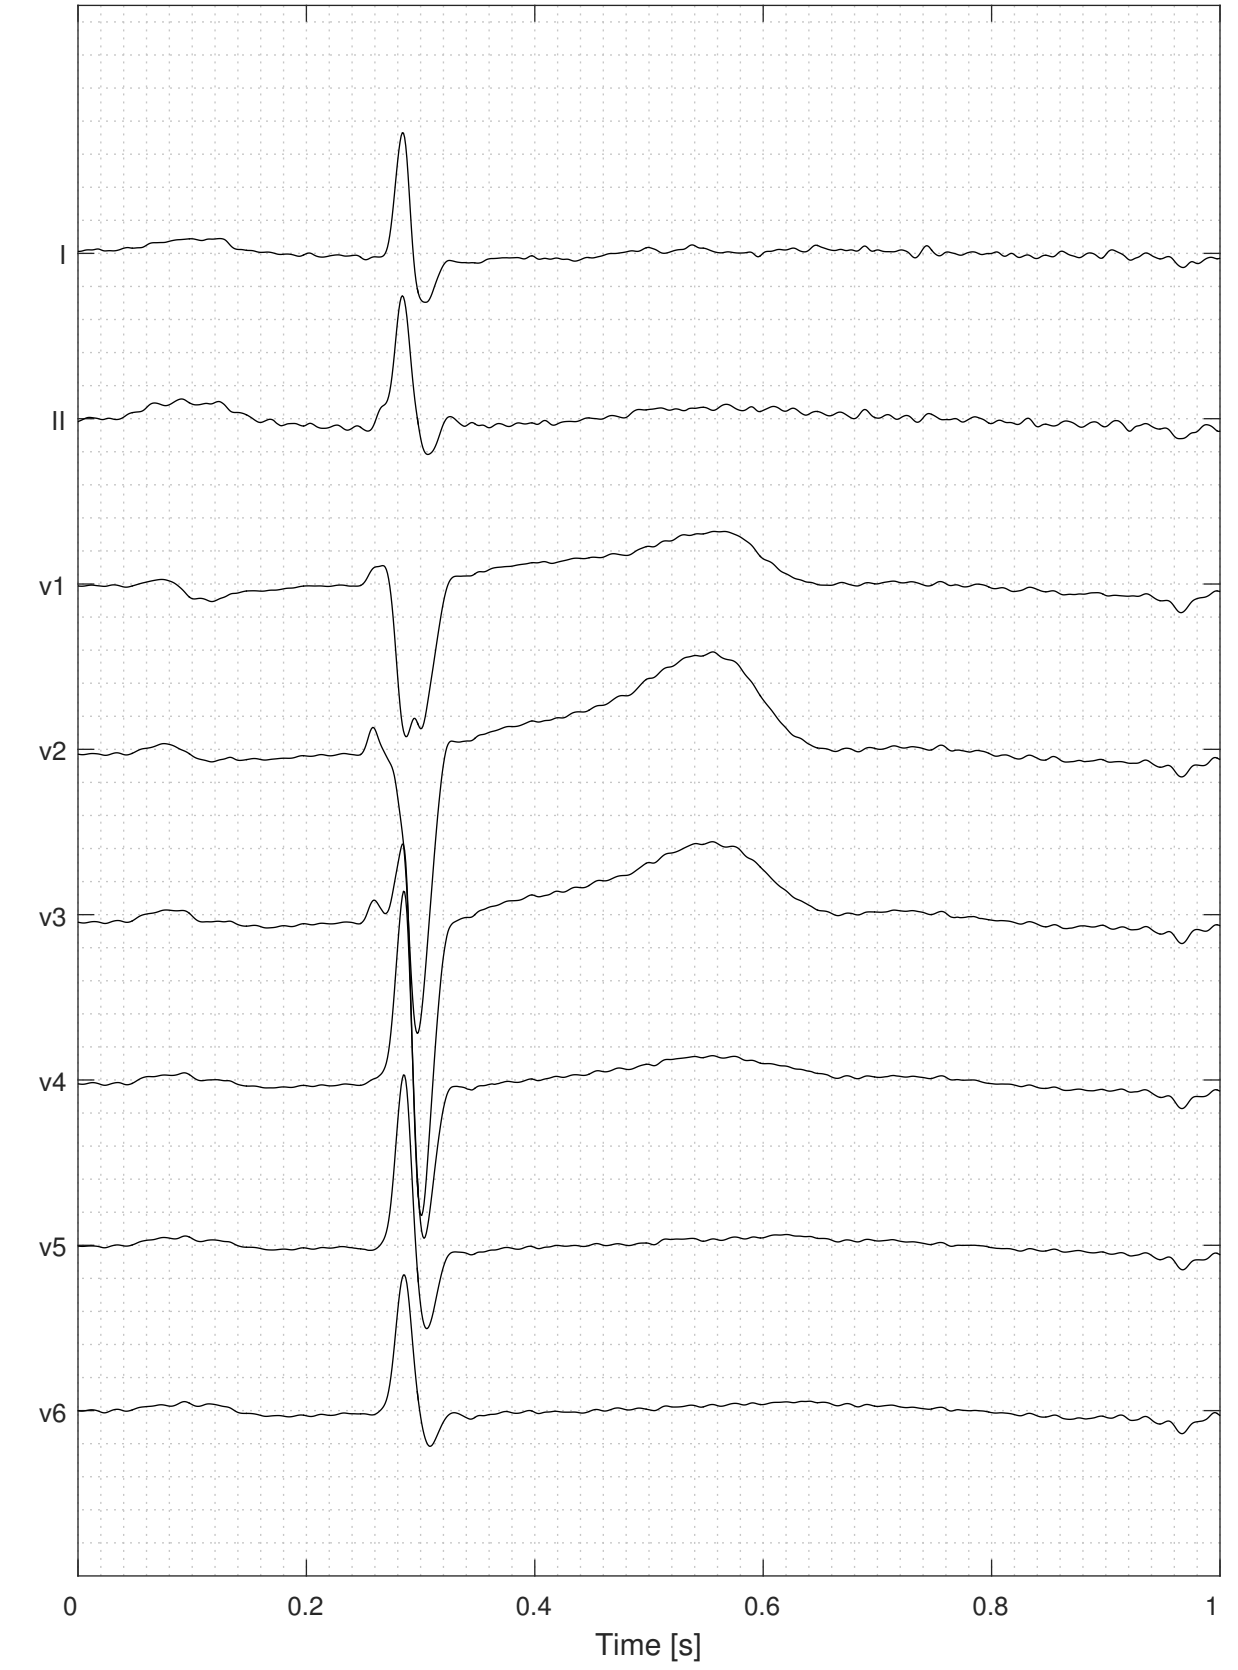

Patient 91

Low RR, Complex #: 345

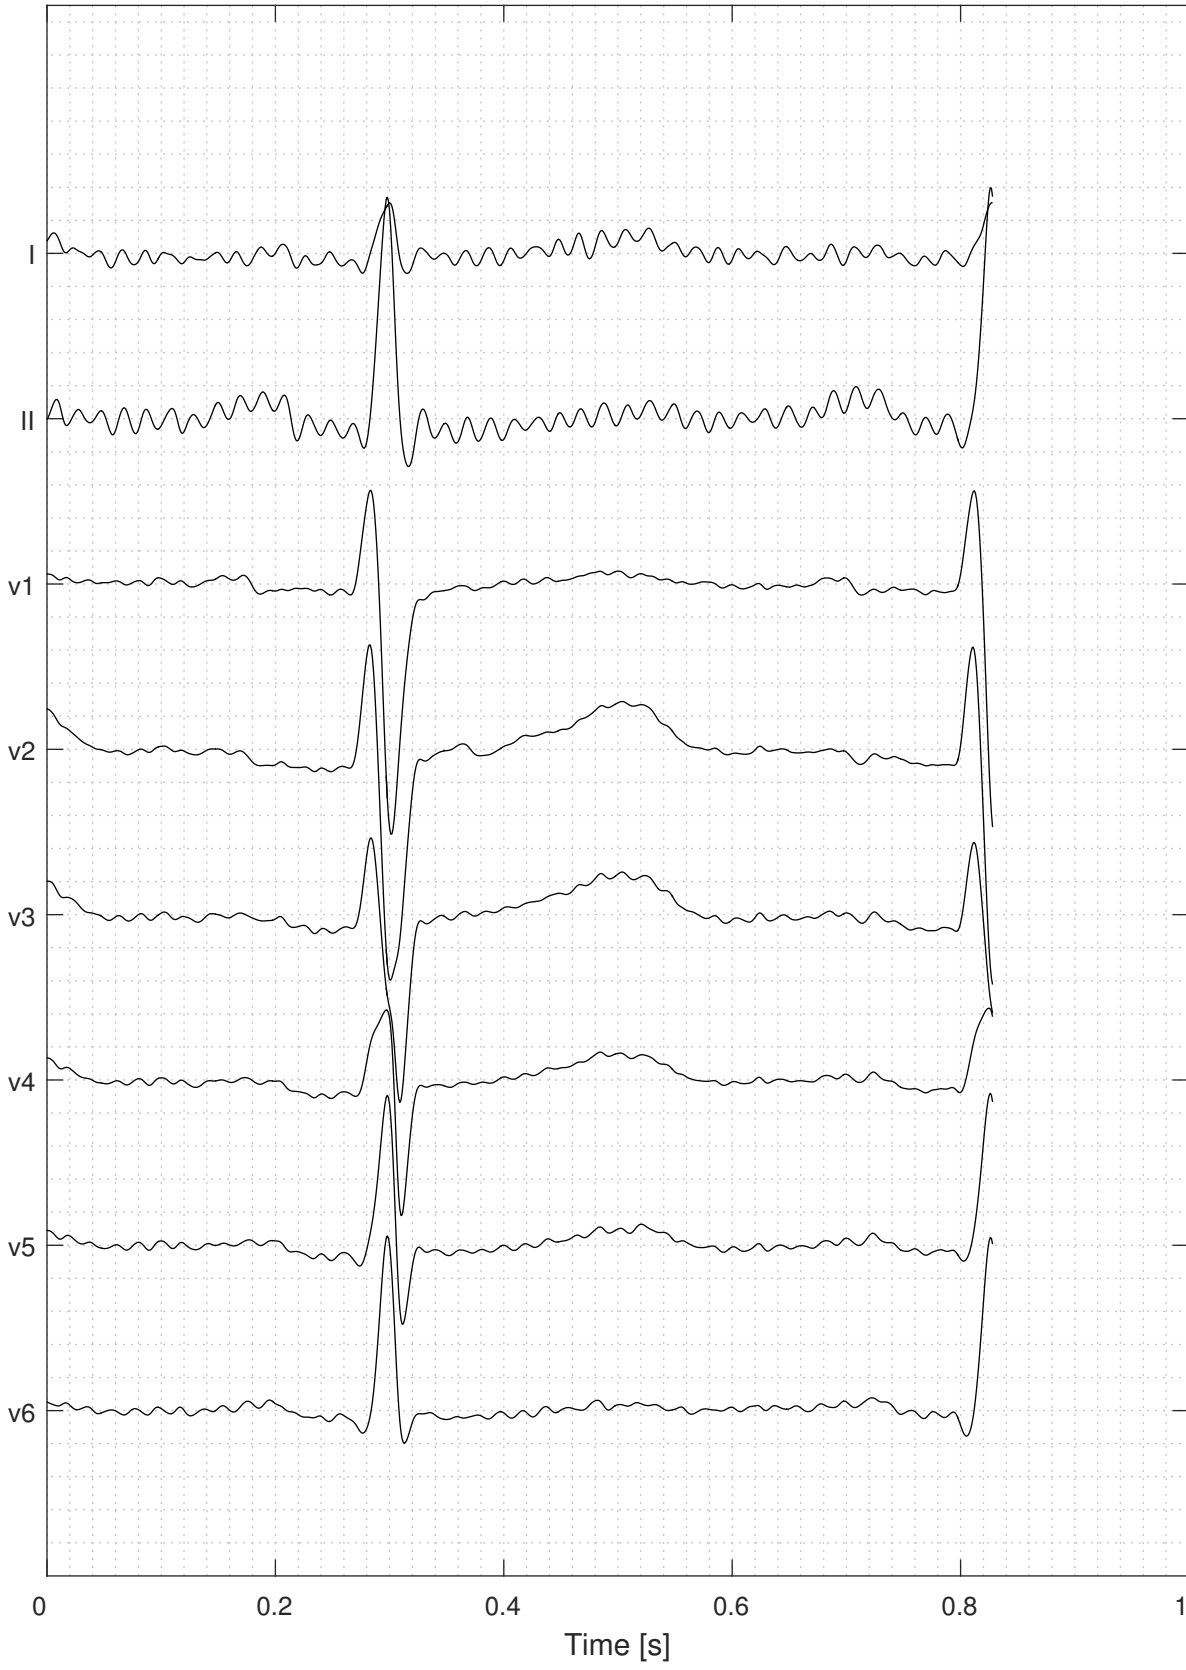

Mid RR, Complex #: 284

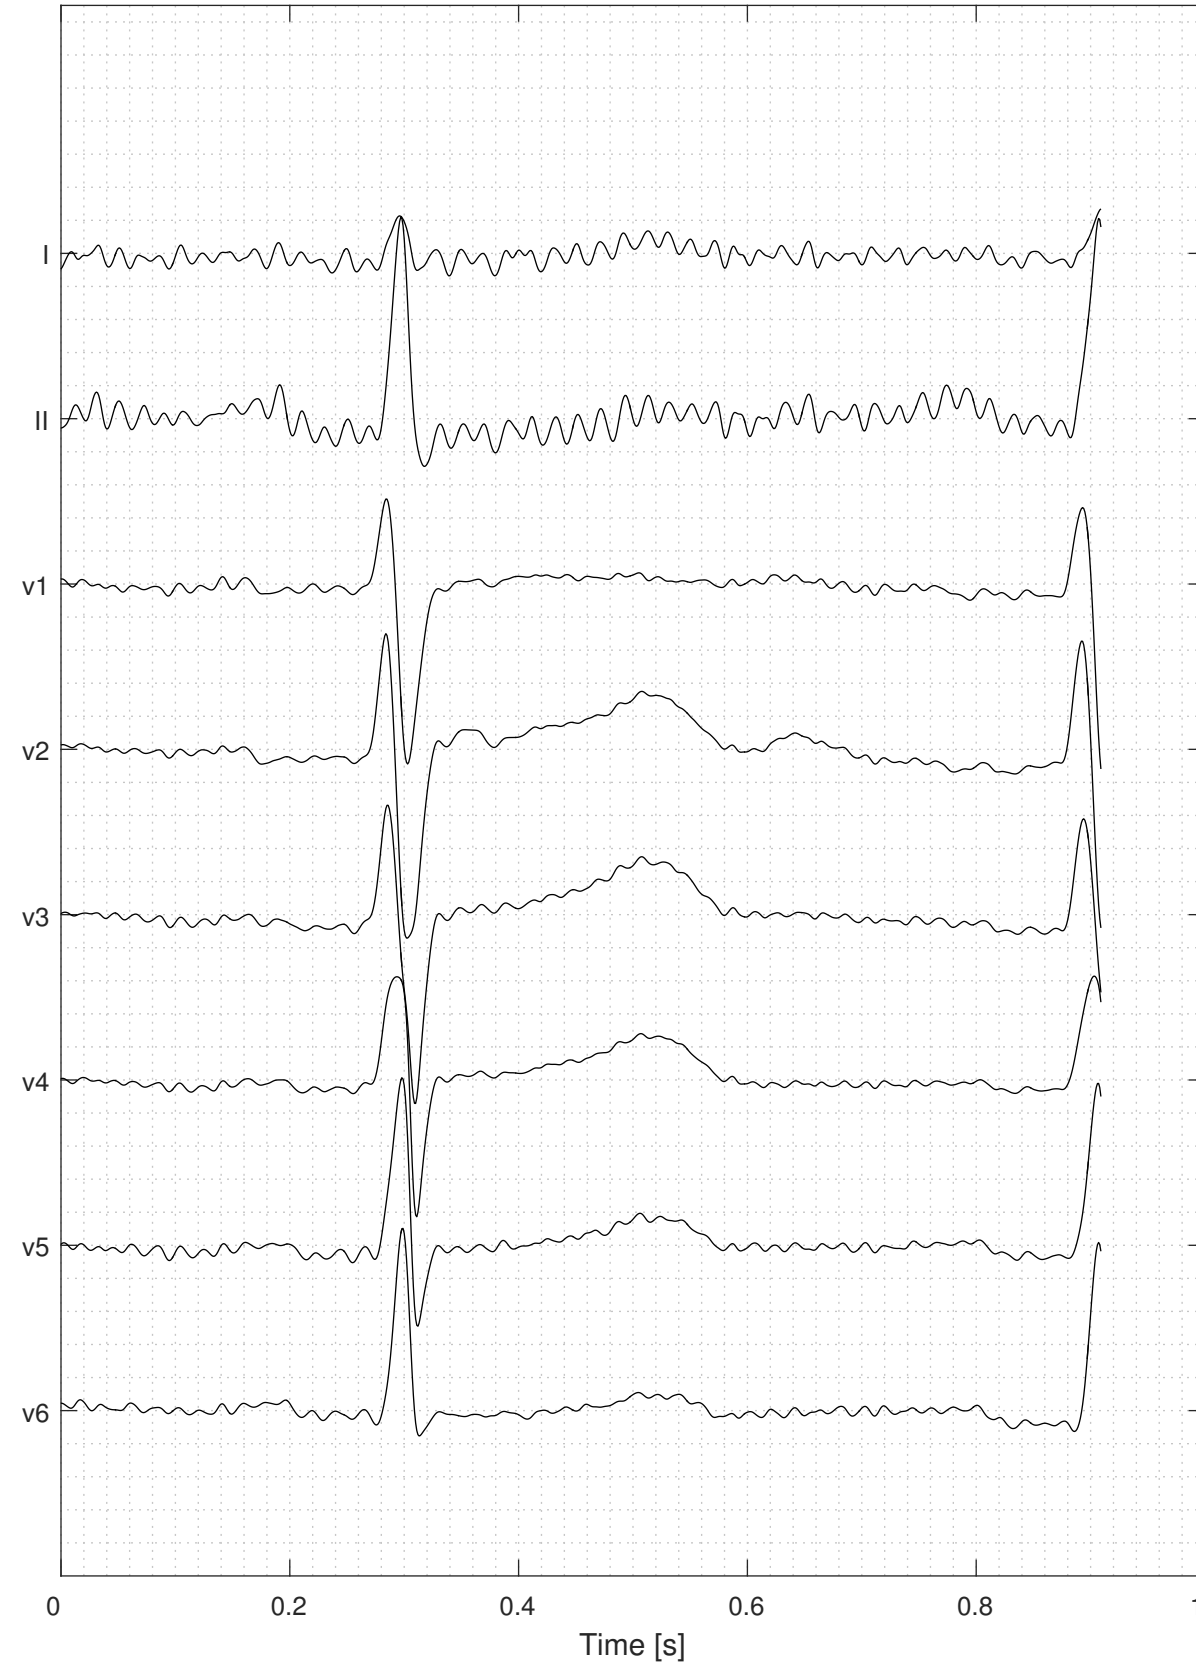

High RR, Complex #: 40

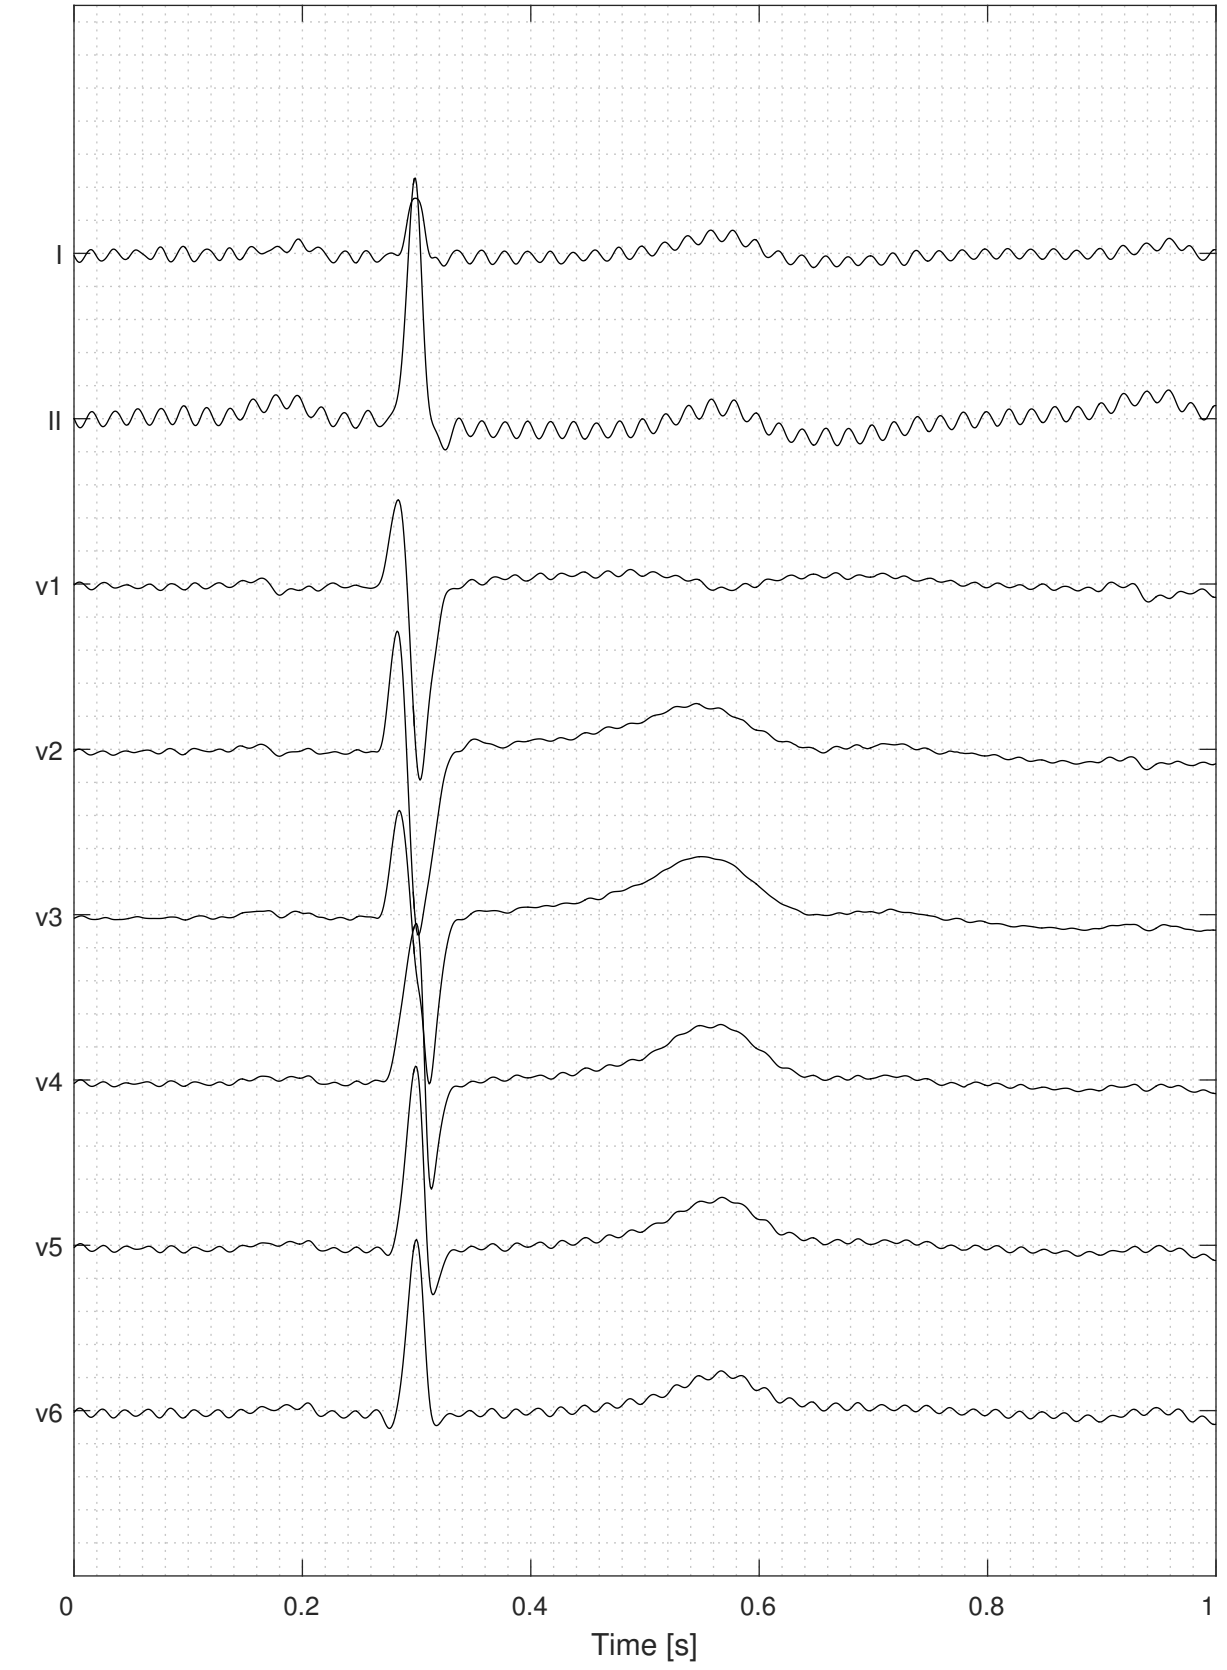

Patient 92

Low RR, Complex #: 251

Mid RR, Complex #: 68

High RR, Complex #: 159

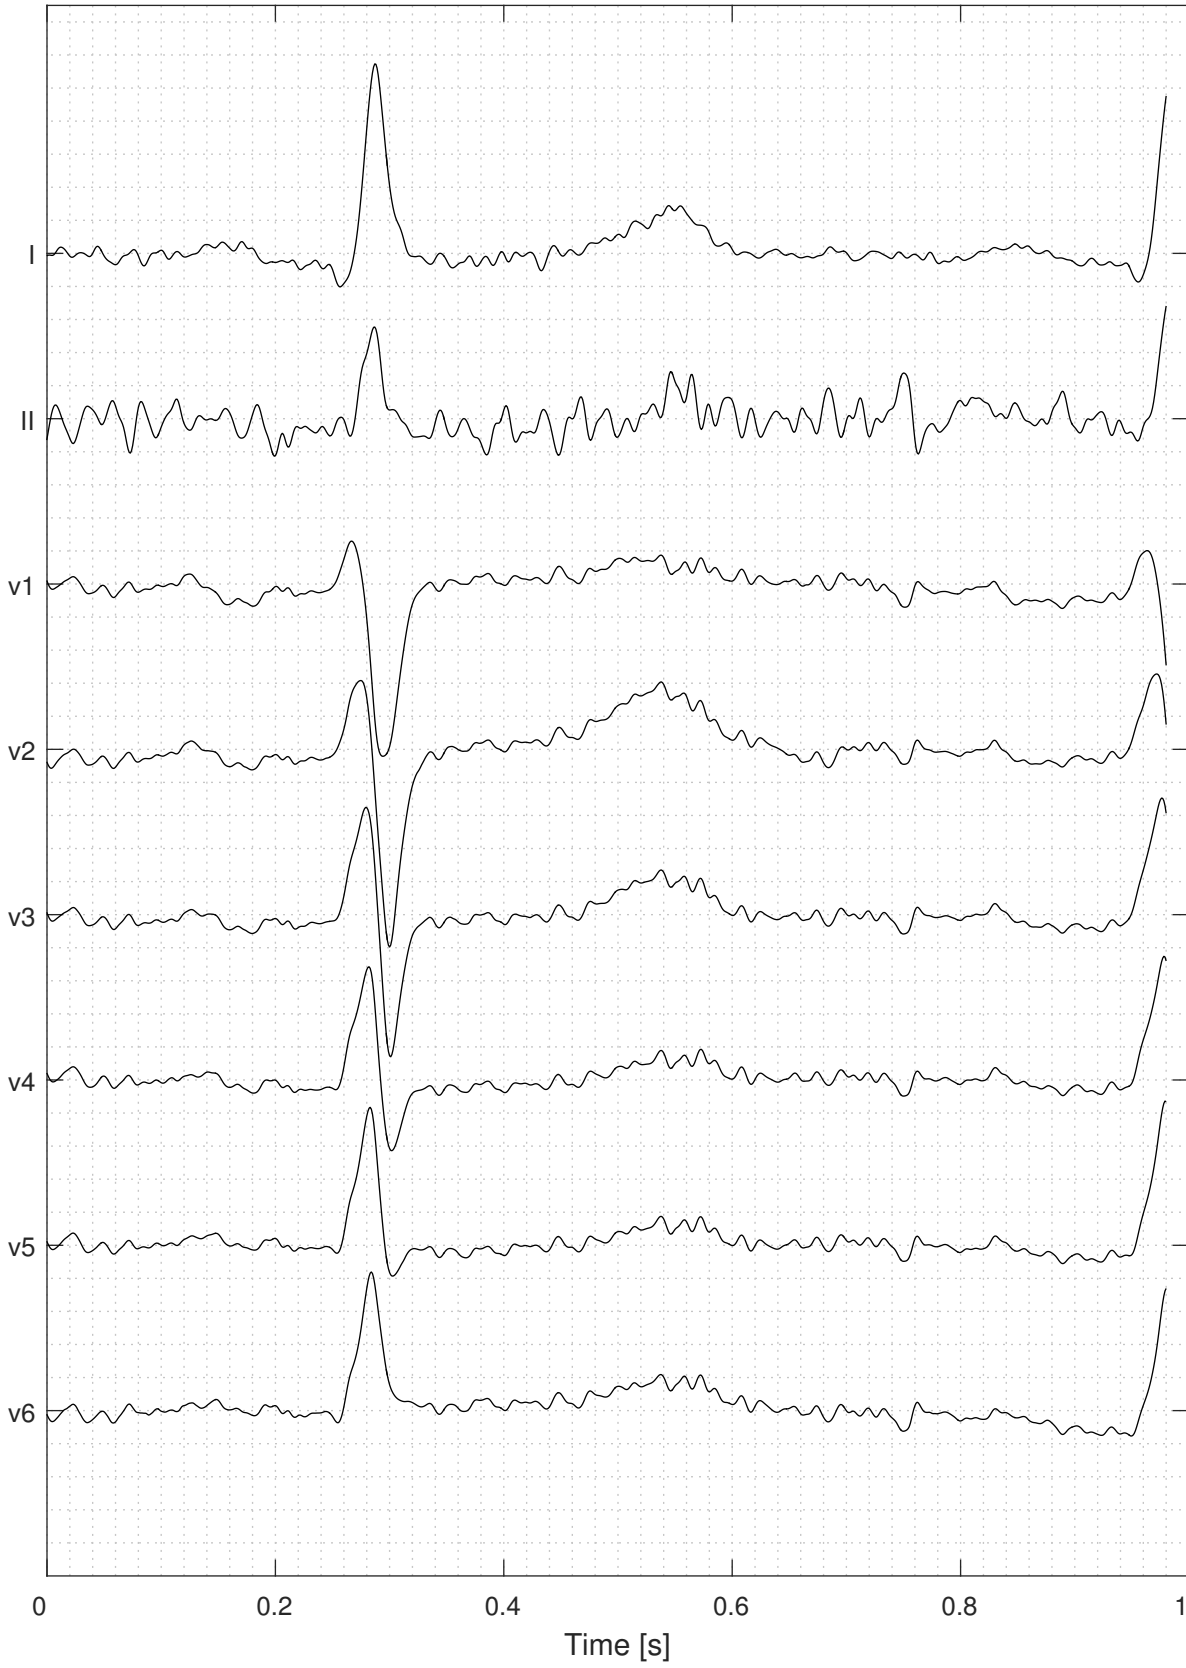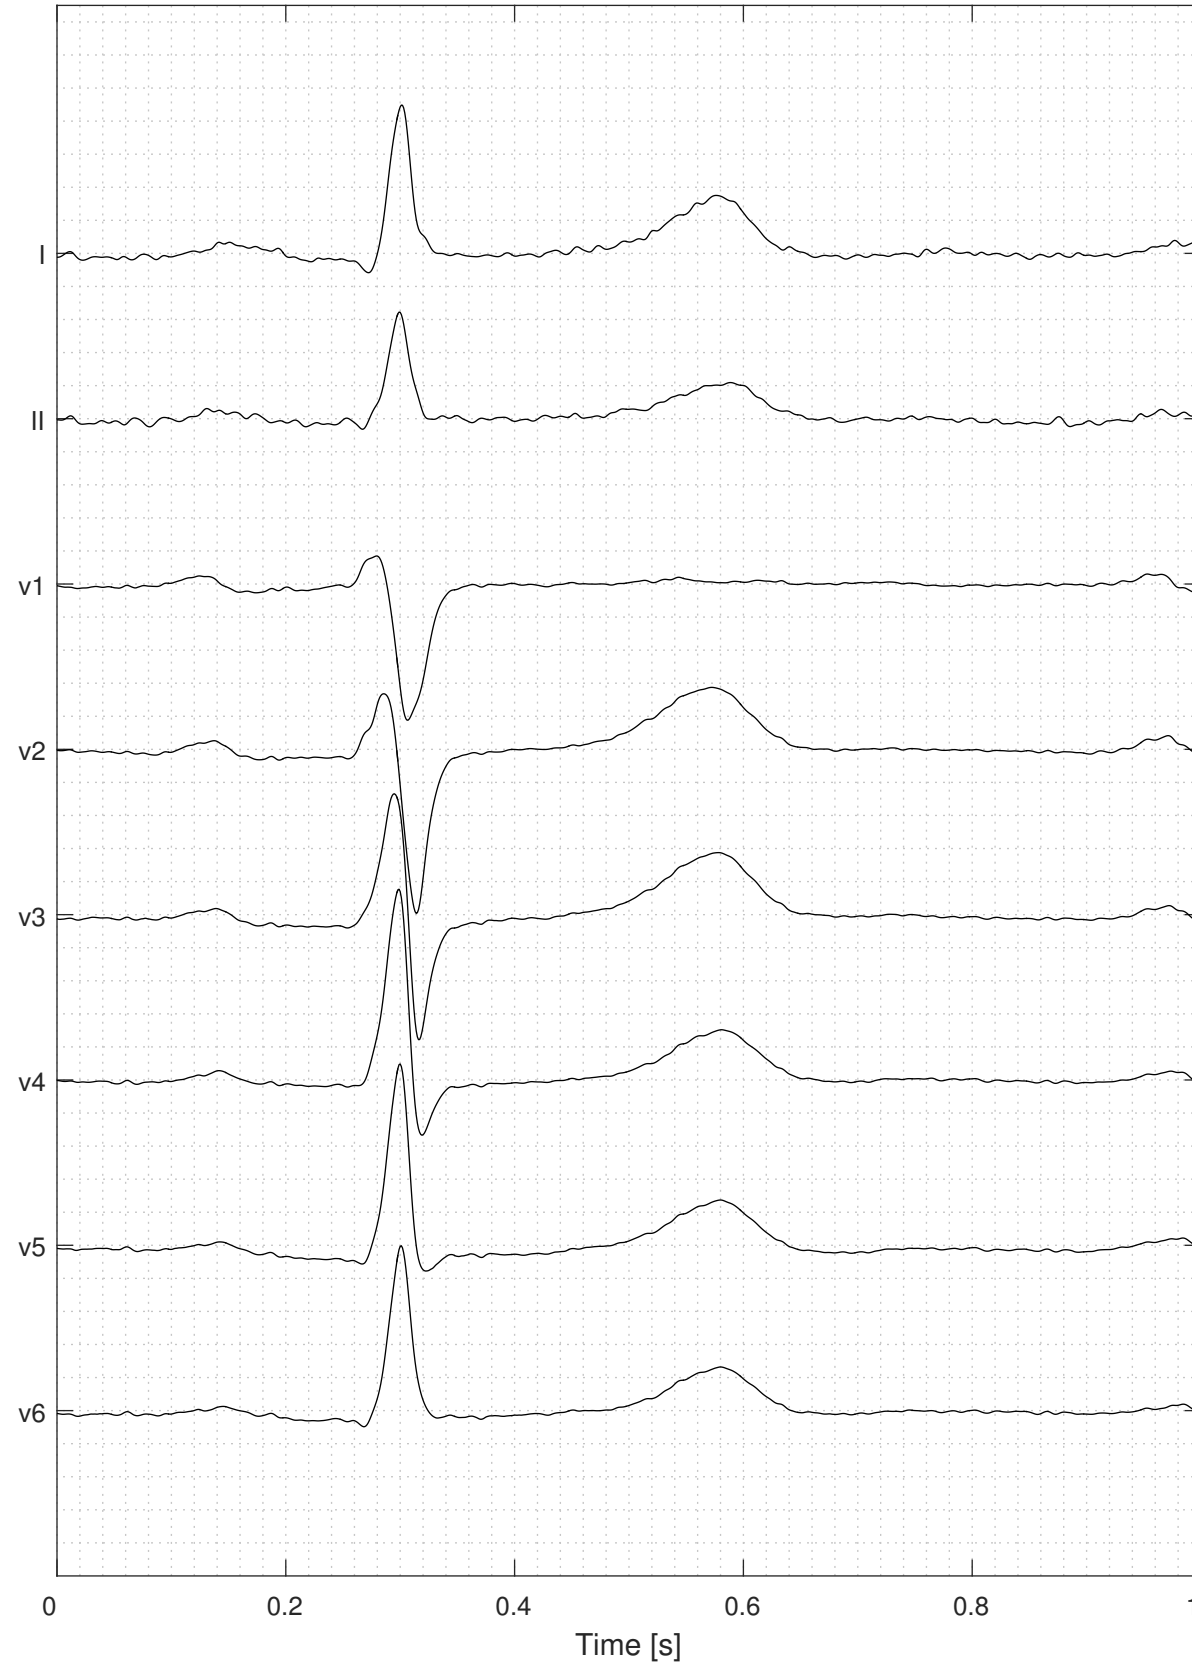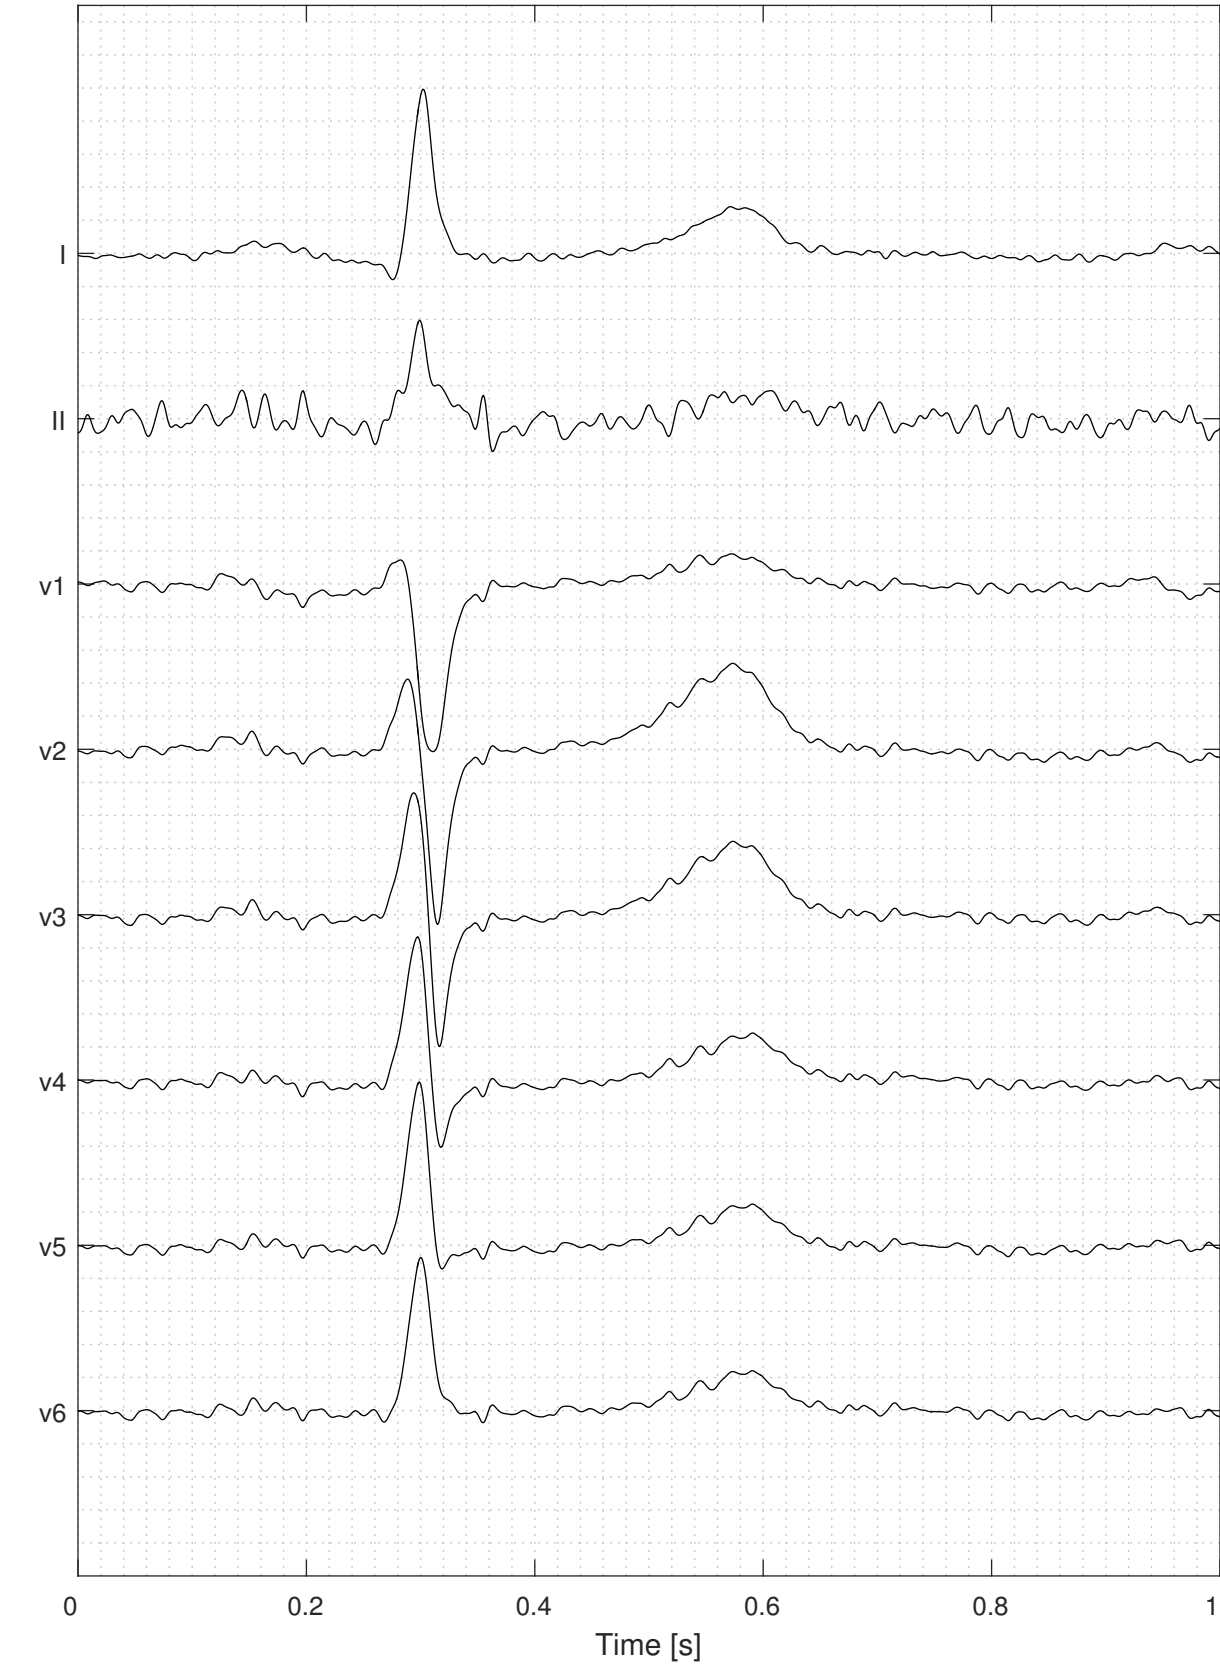

Patient 93

Low RR, Complex #: 260

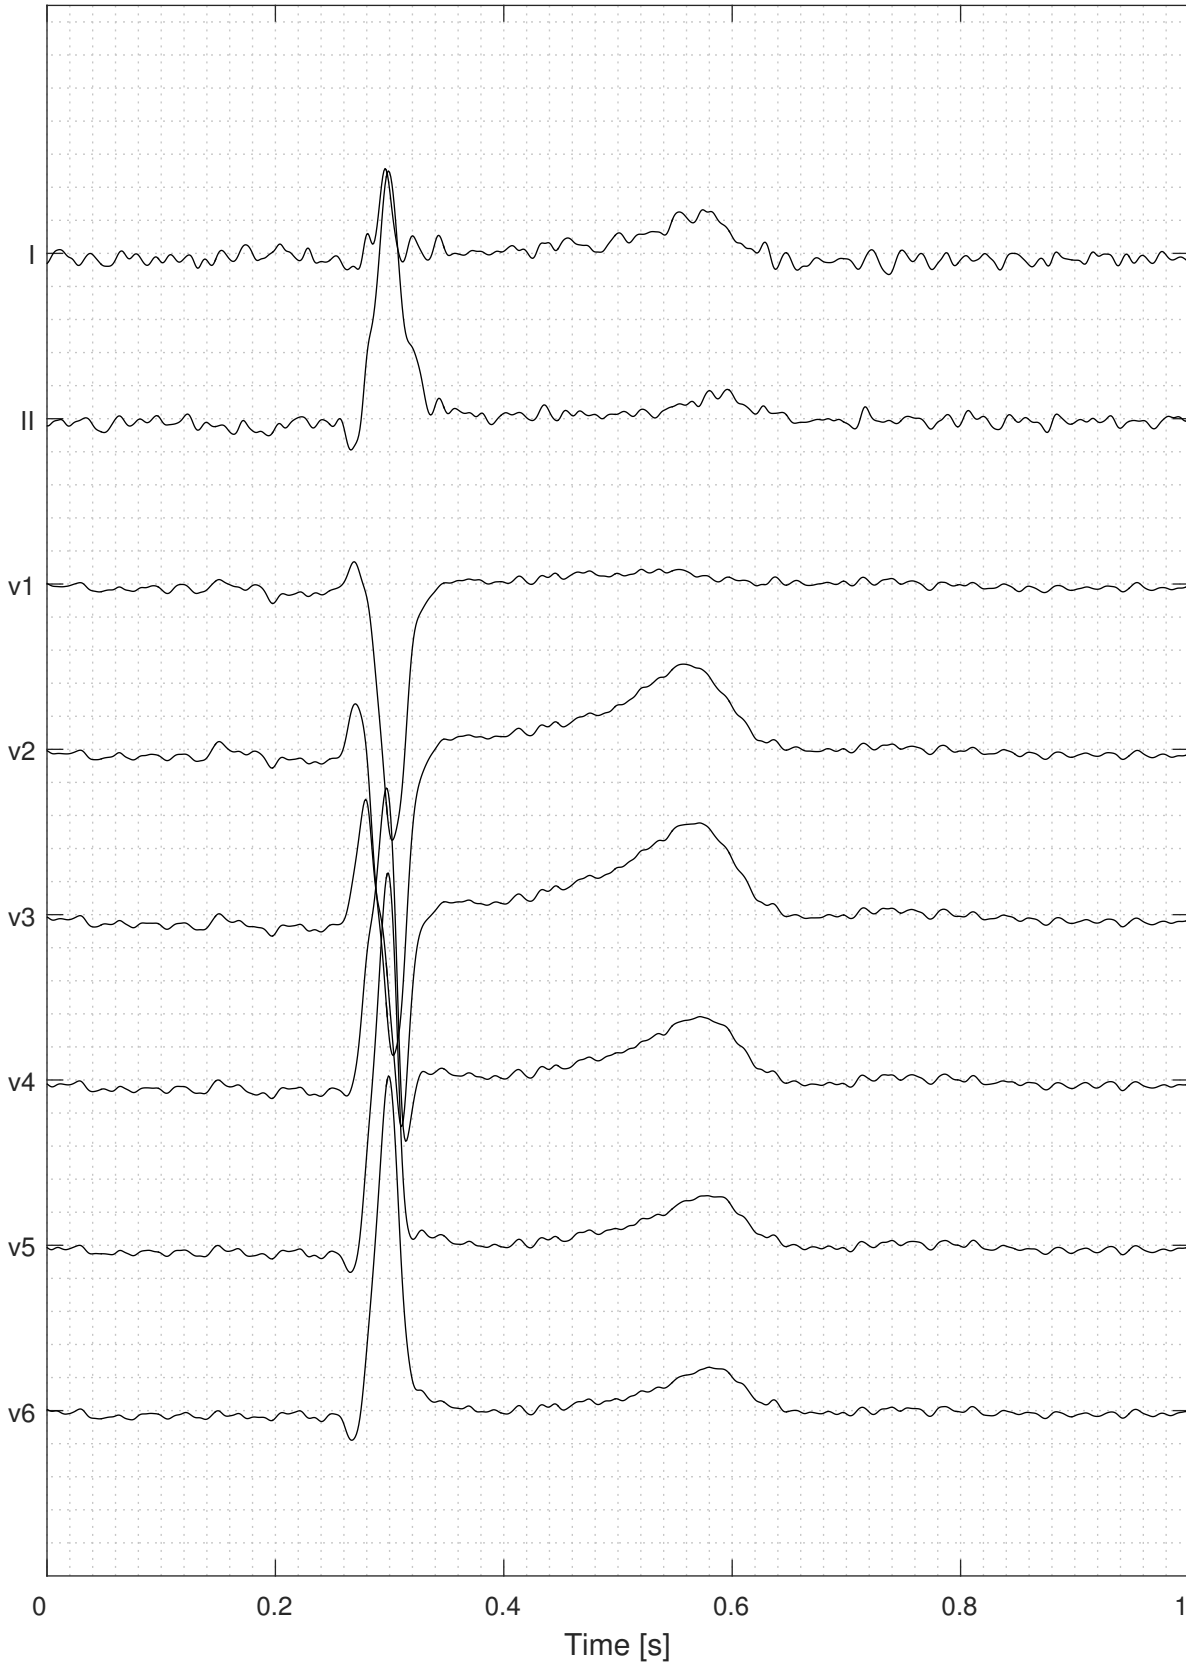

Mid RR, Complex #: 141

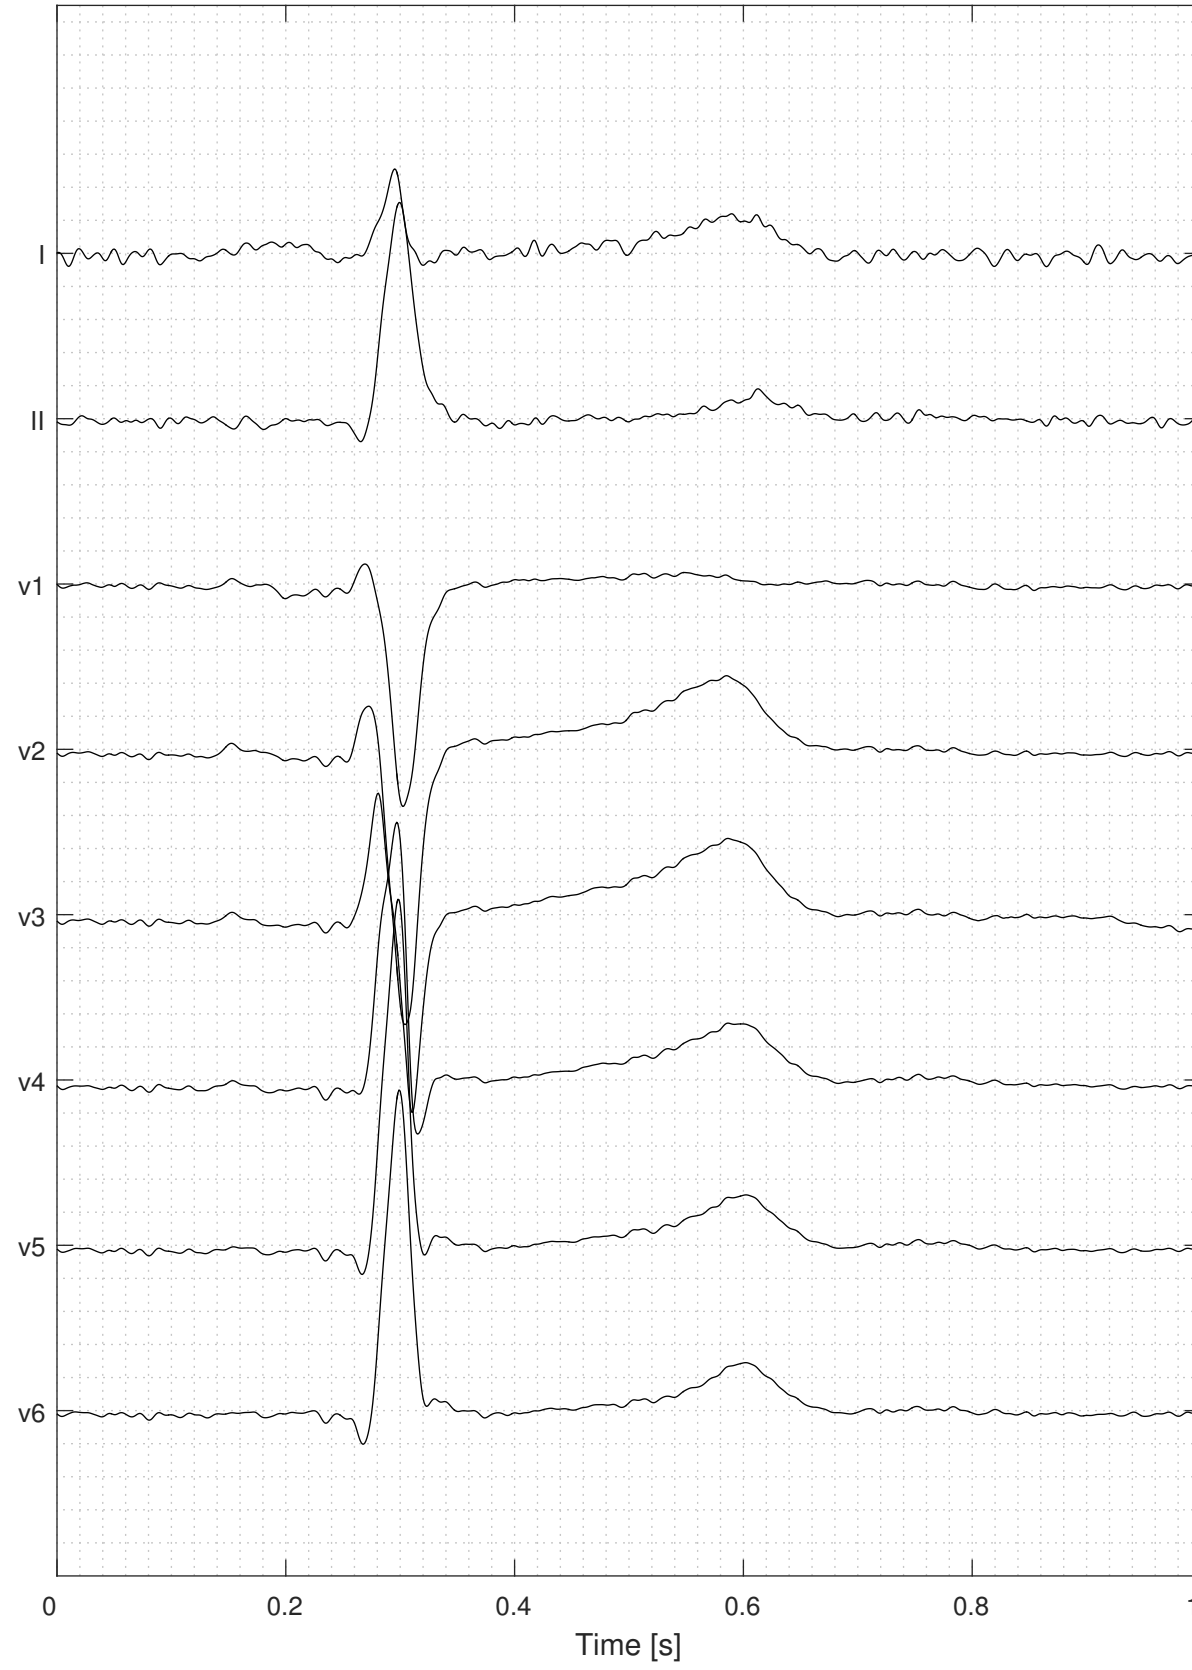

High RR, Complex #: 32

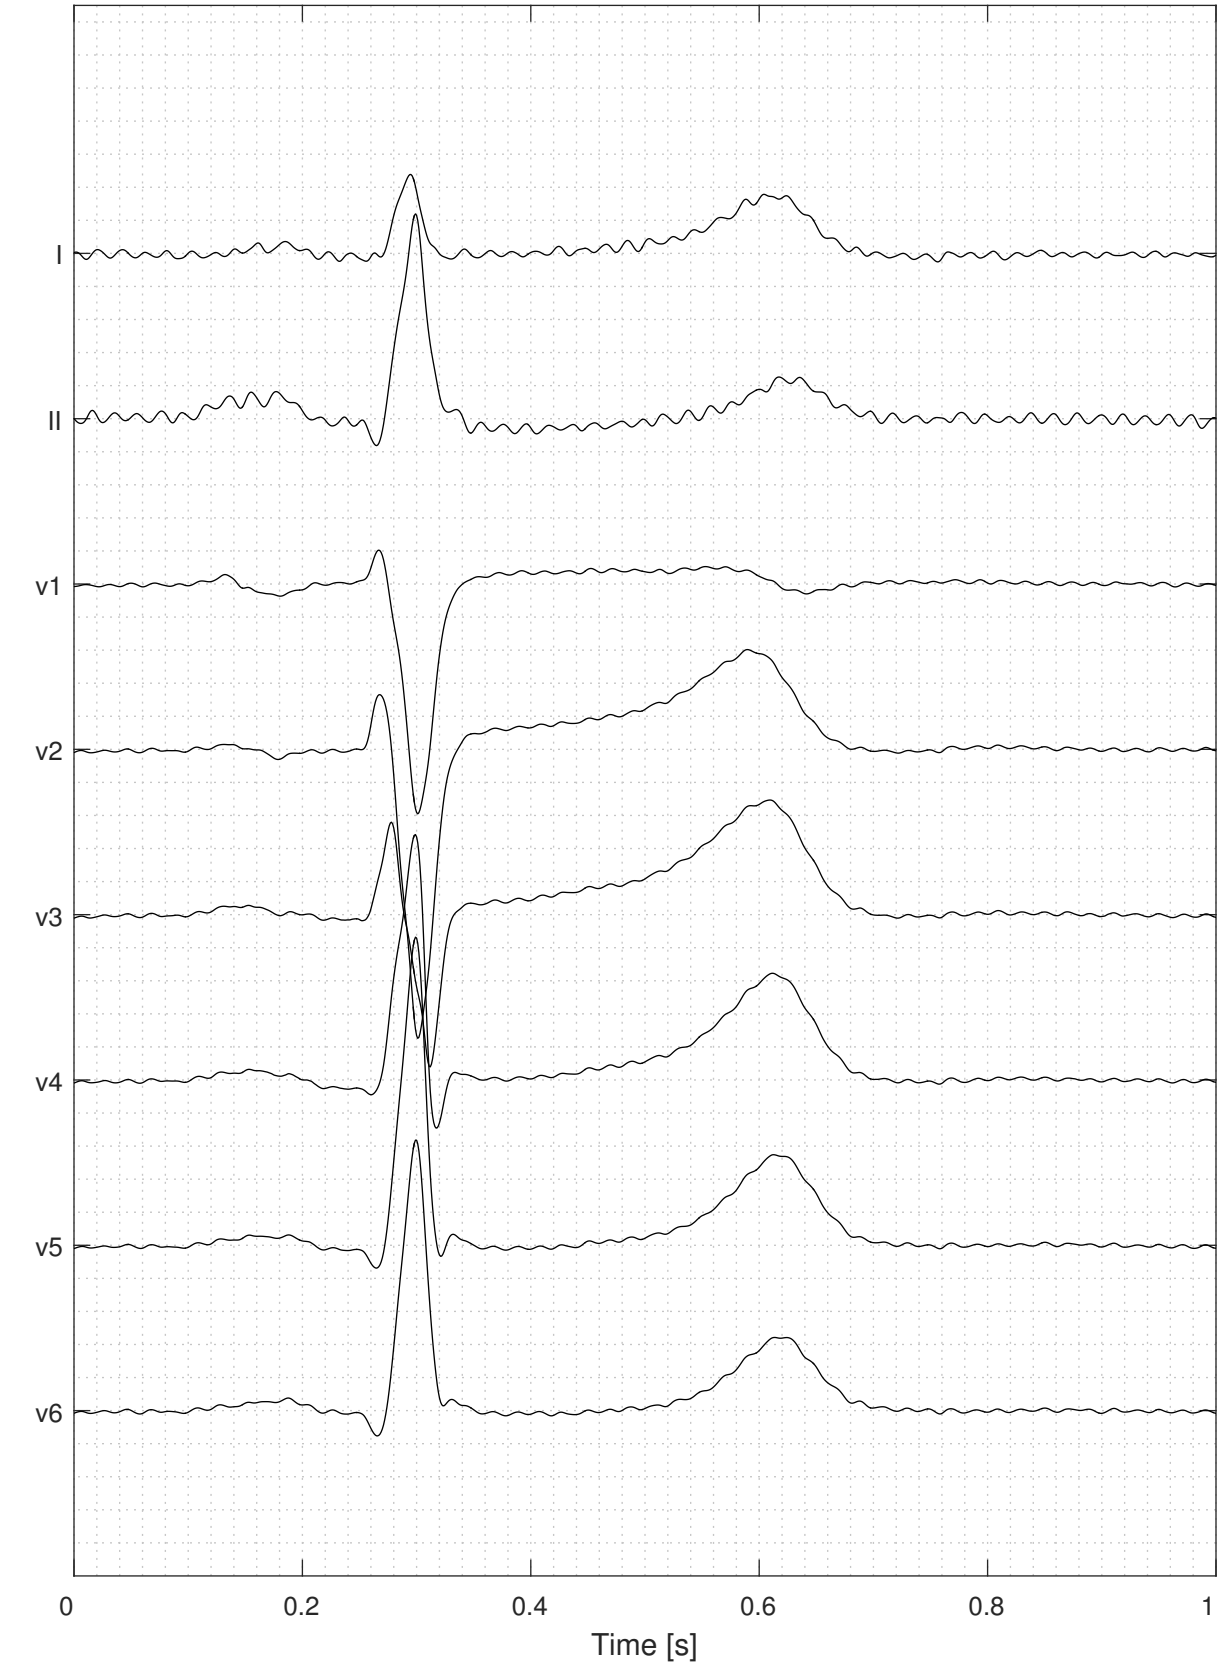

Patient 94

Low RR, Complex #: 256

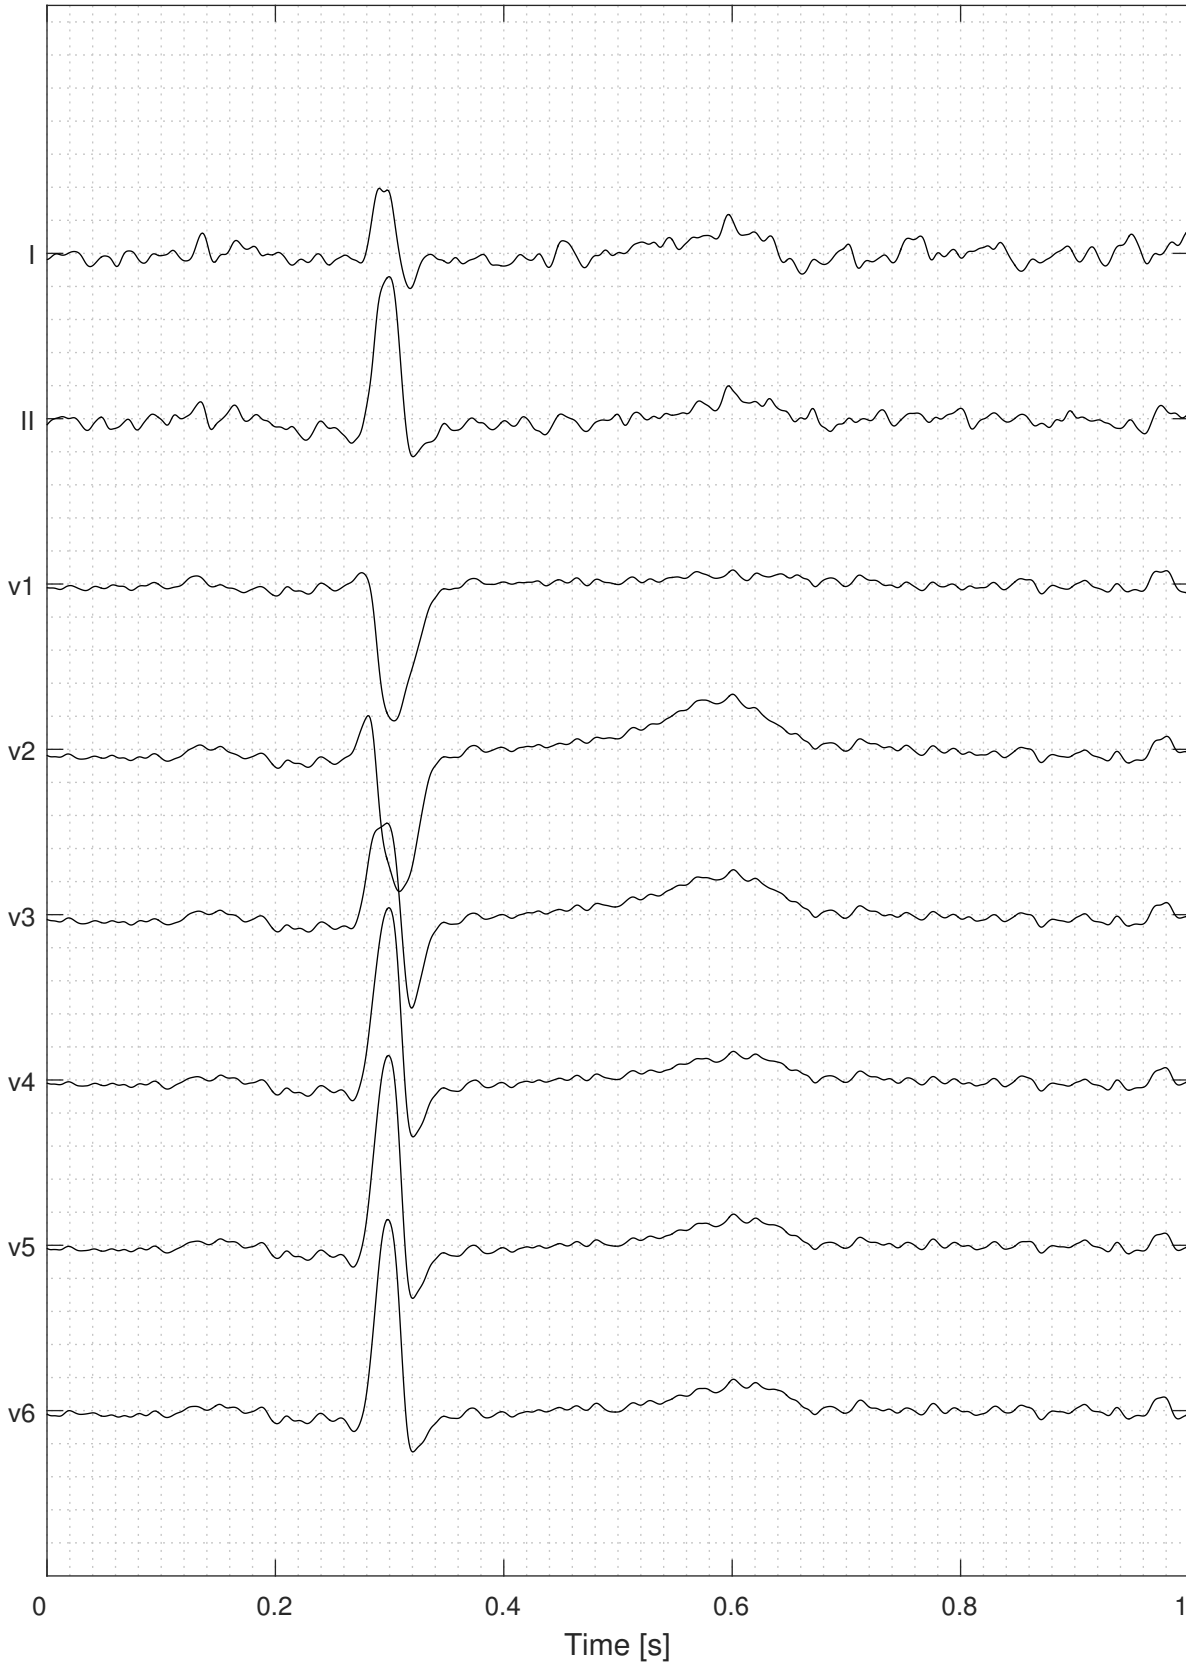

Mid RR, Complex #: 155

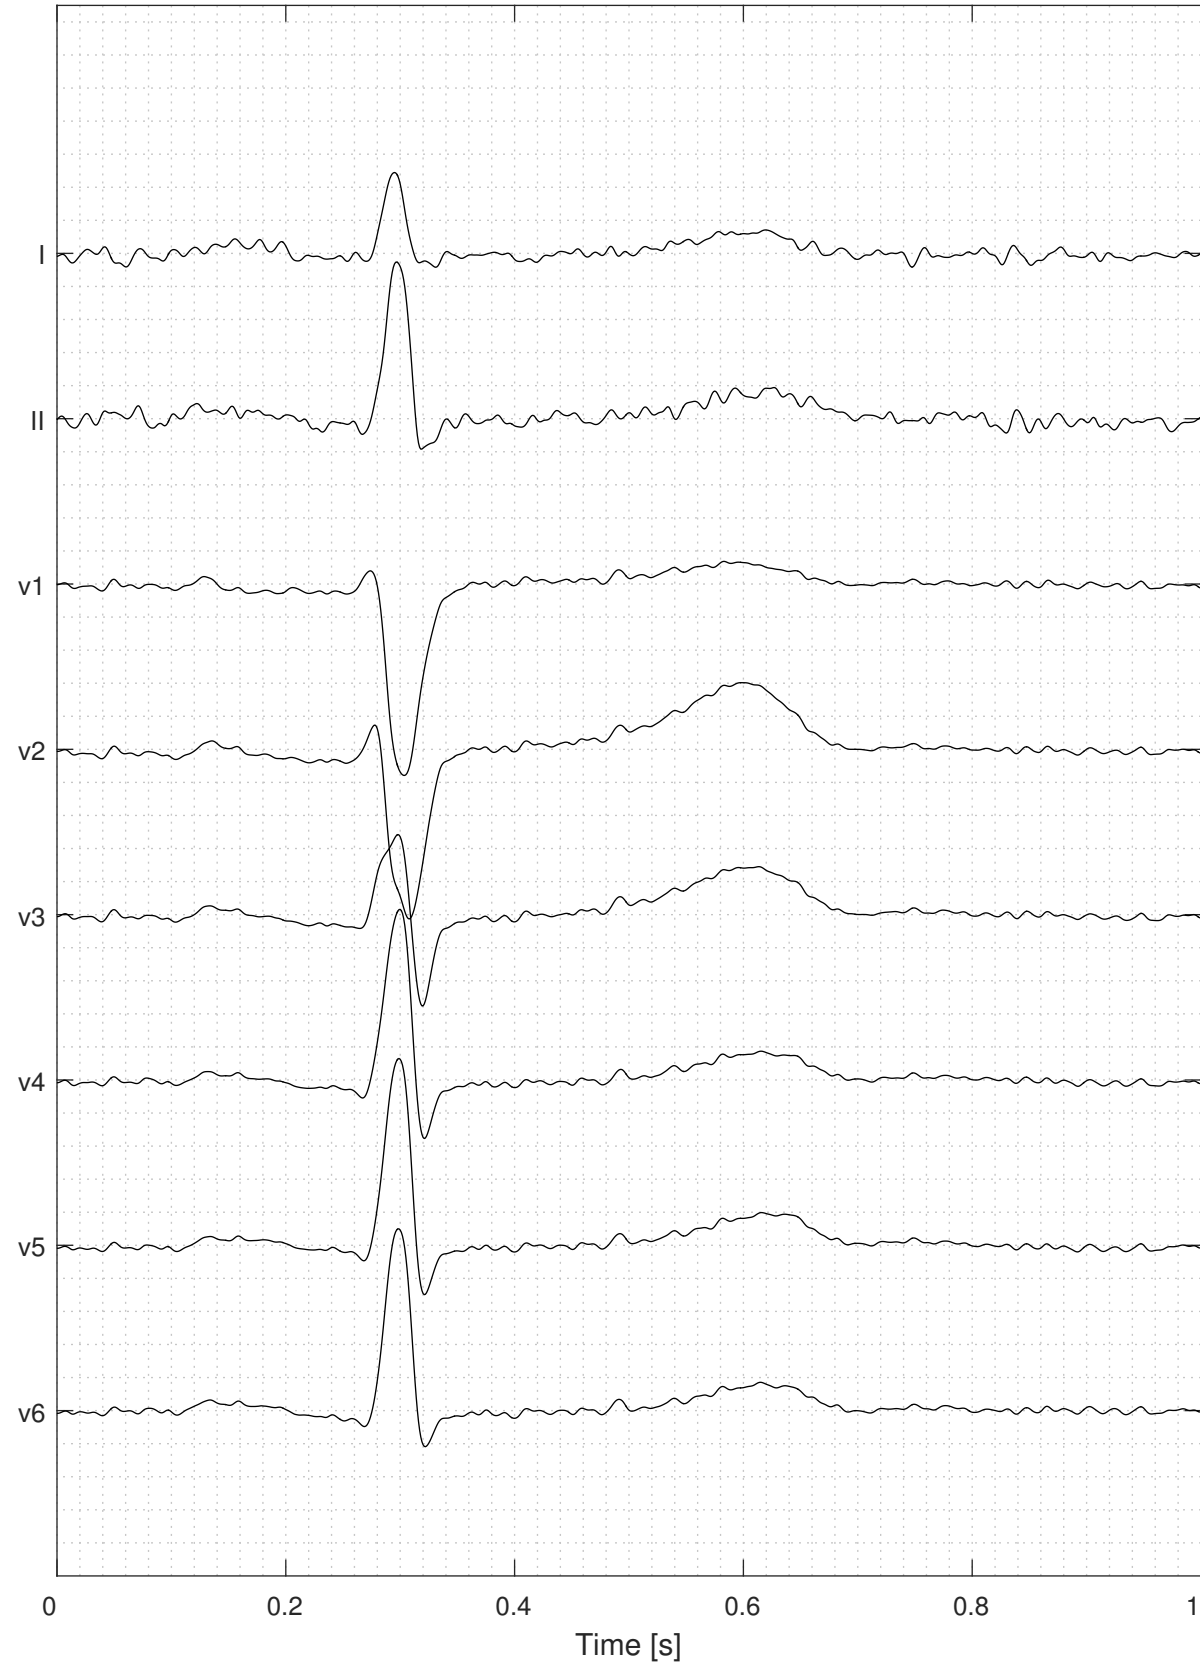

High RR, Complex #: 162

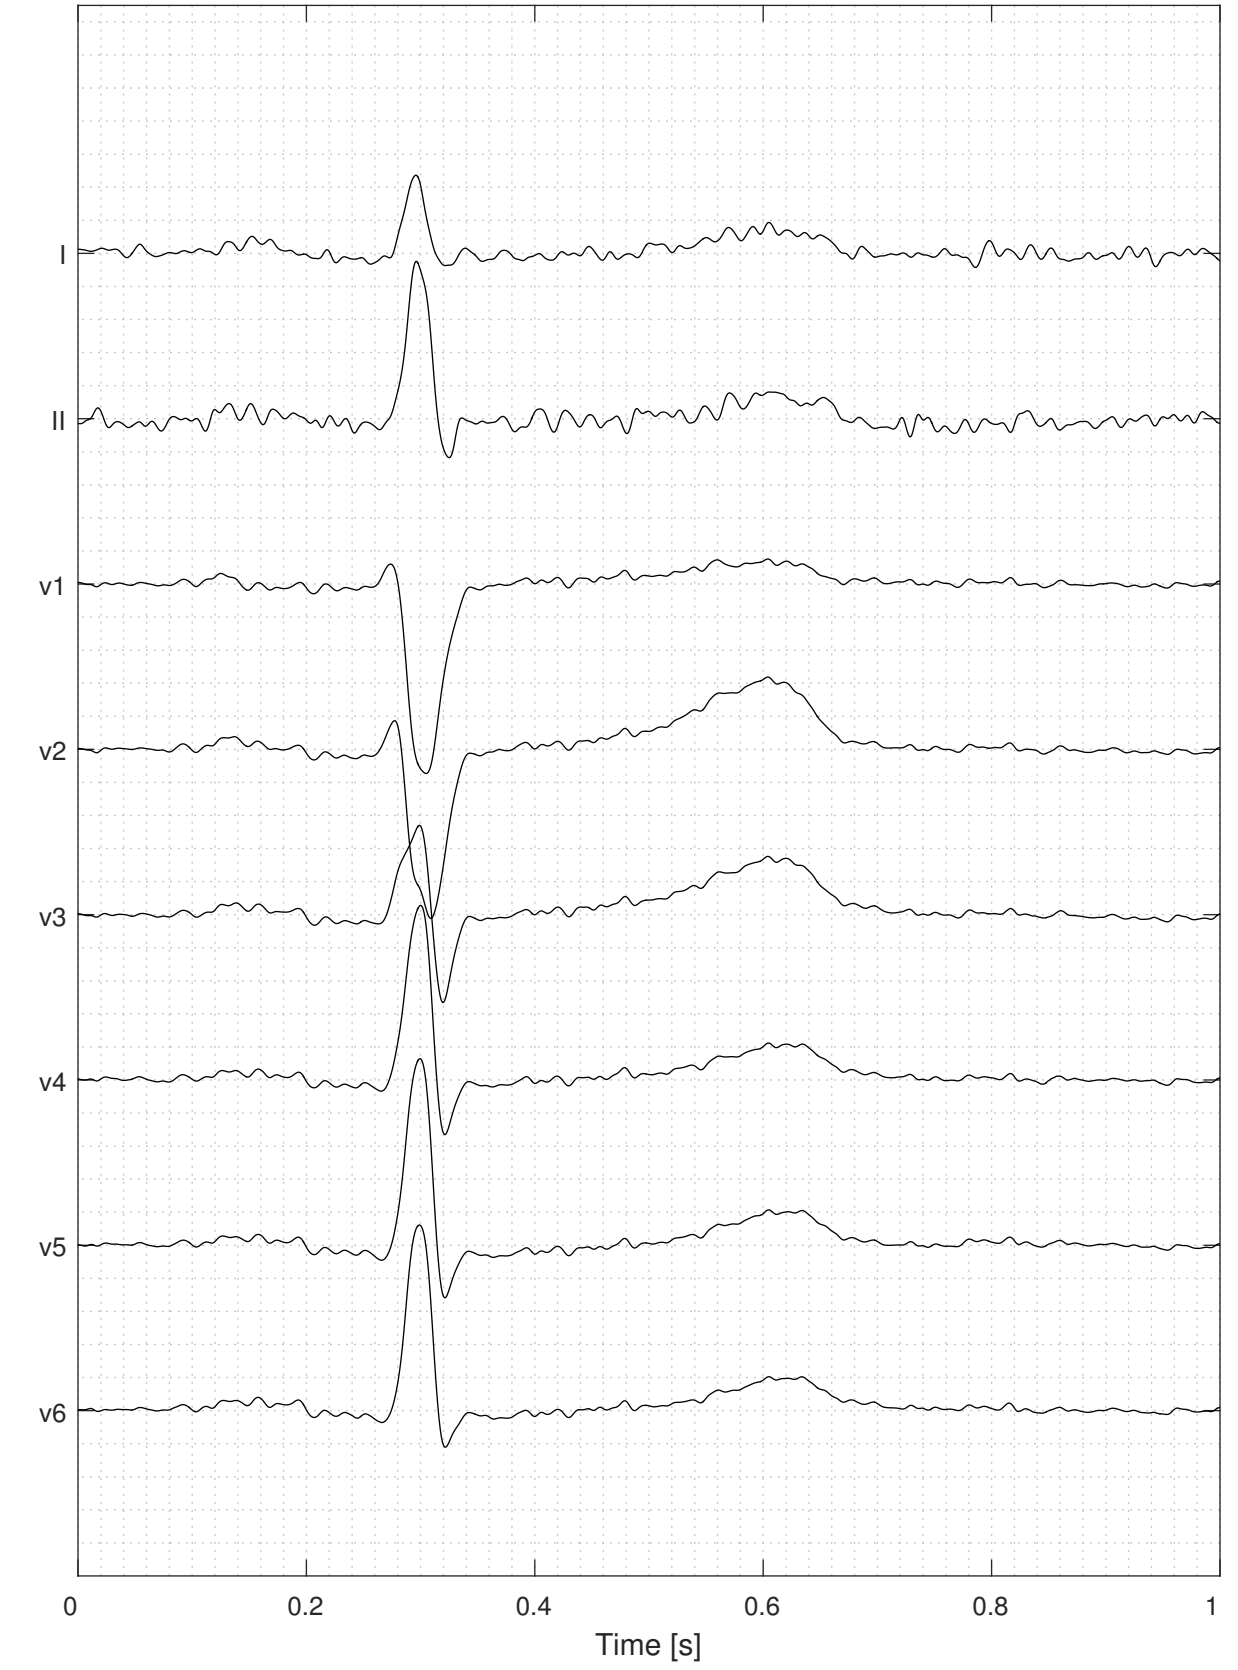

Patient 95

Low RR, Complex #: 327

Mid RR, Complex #: 146

High RR, Complex #: 51

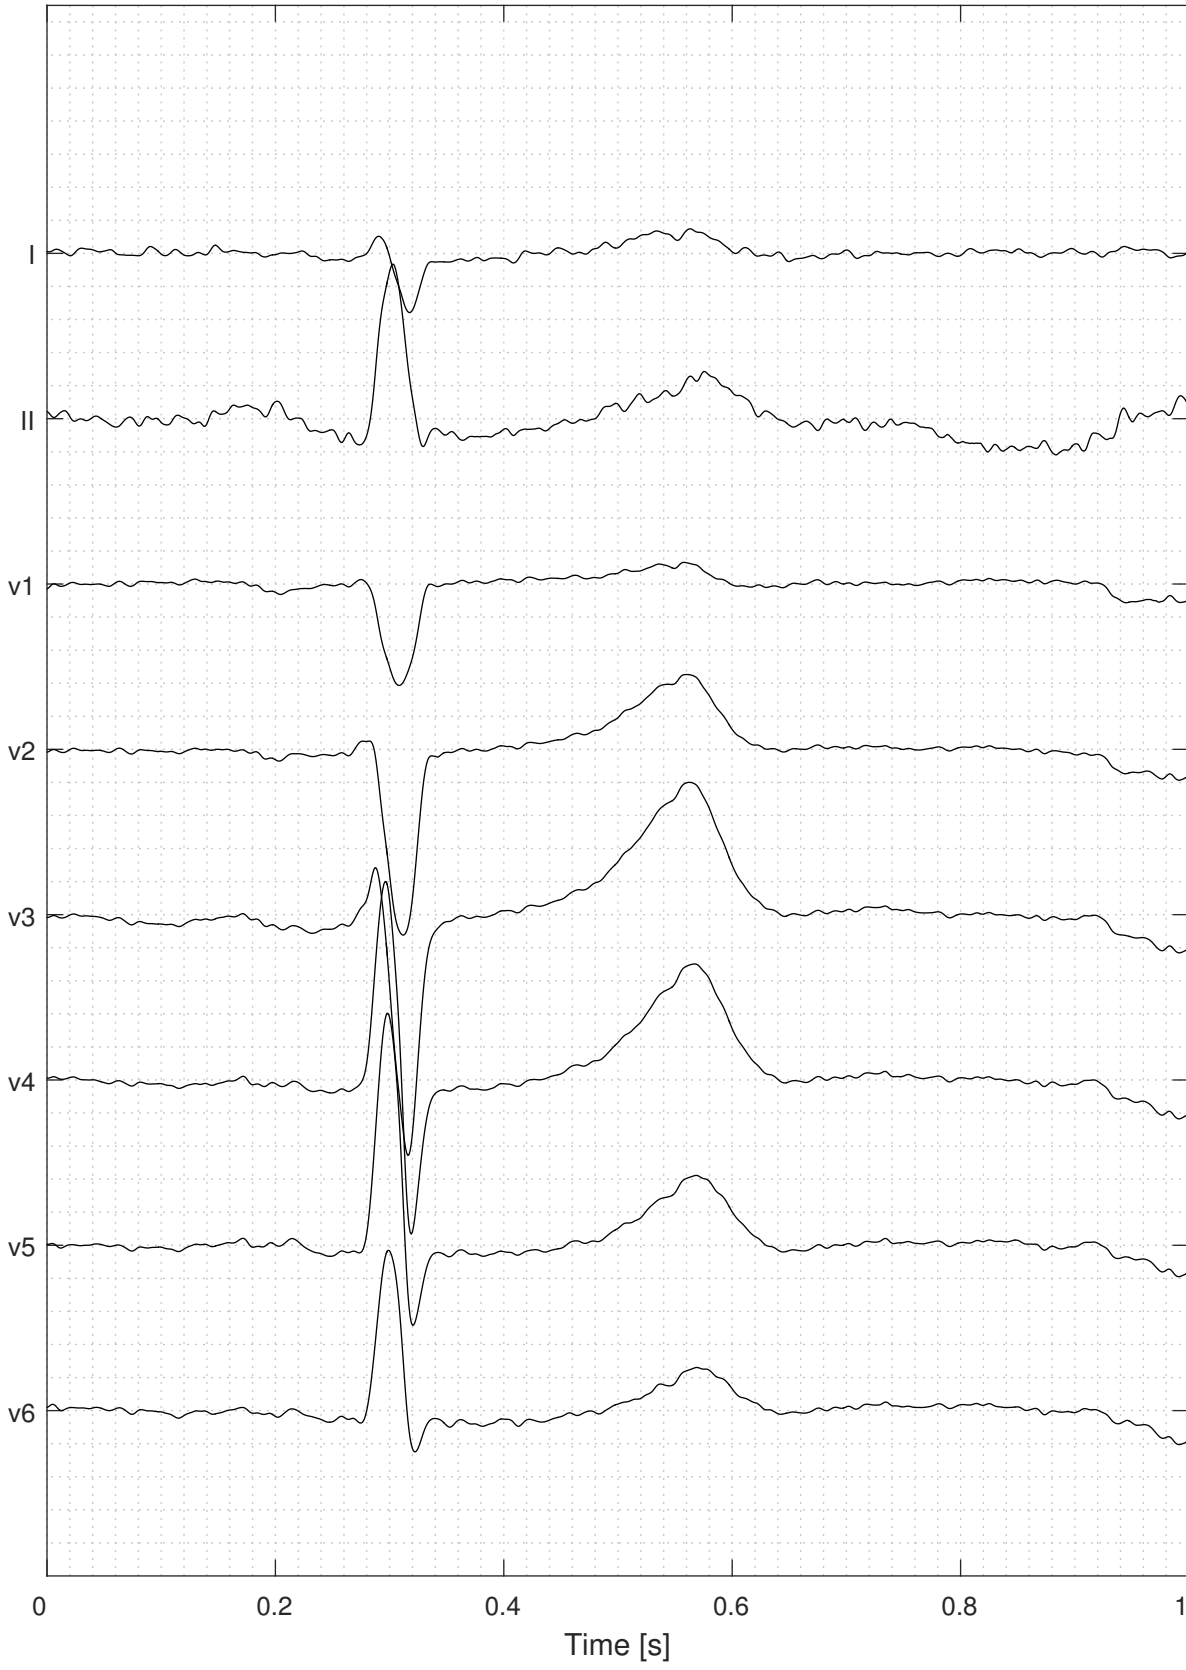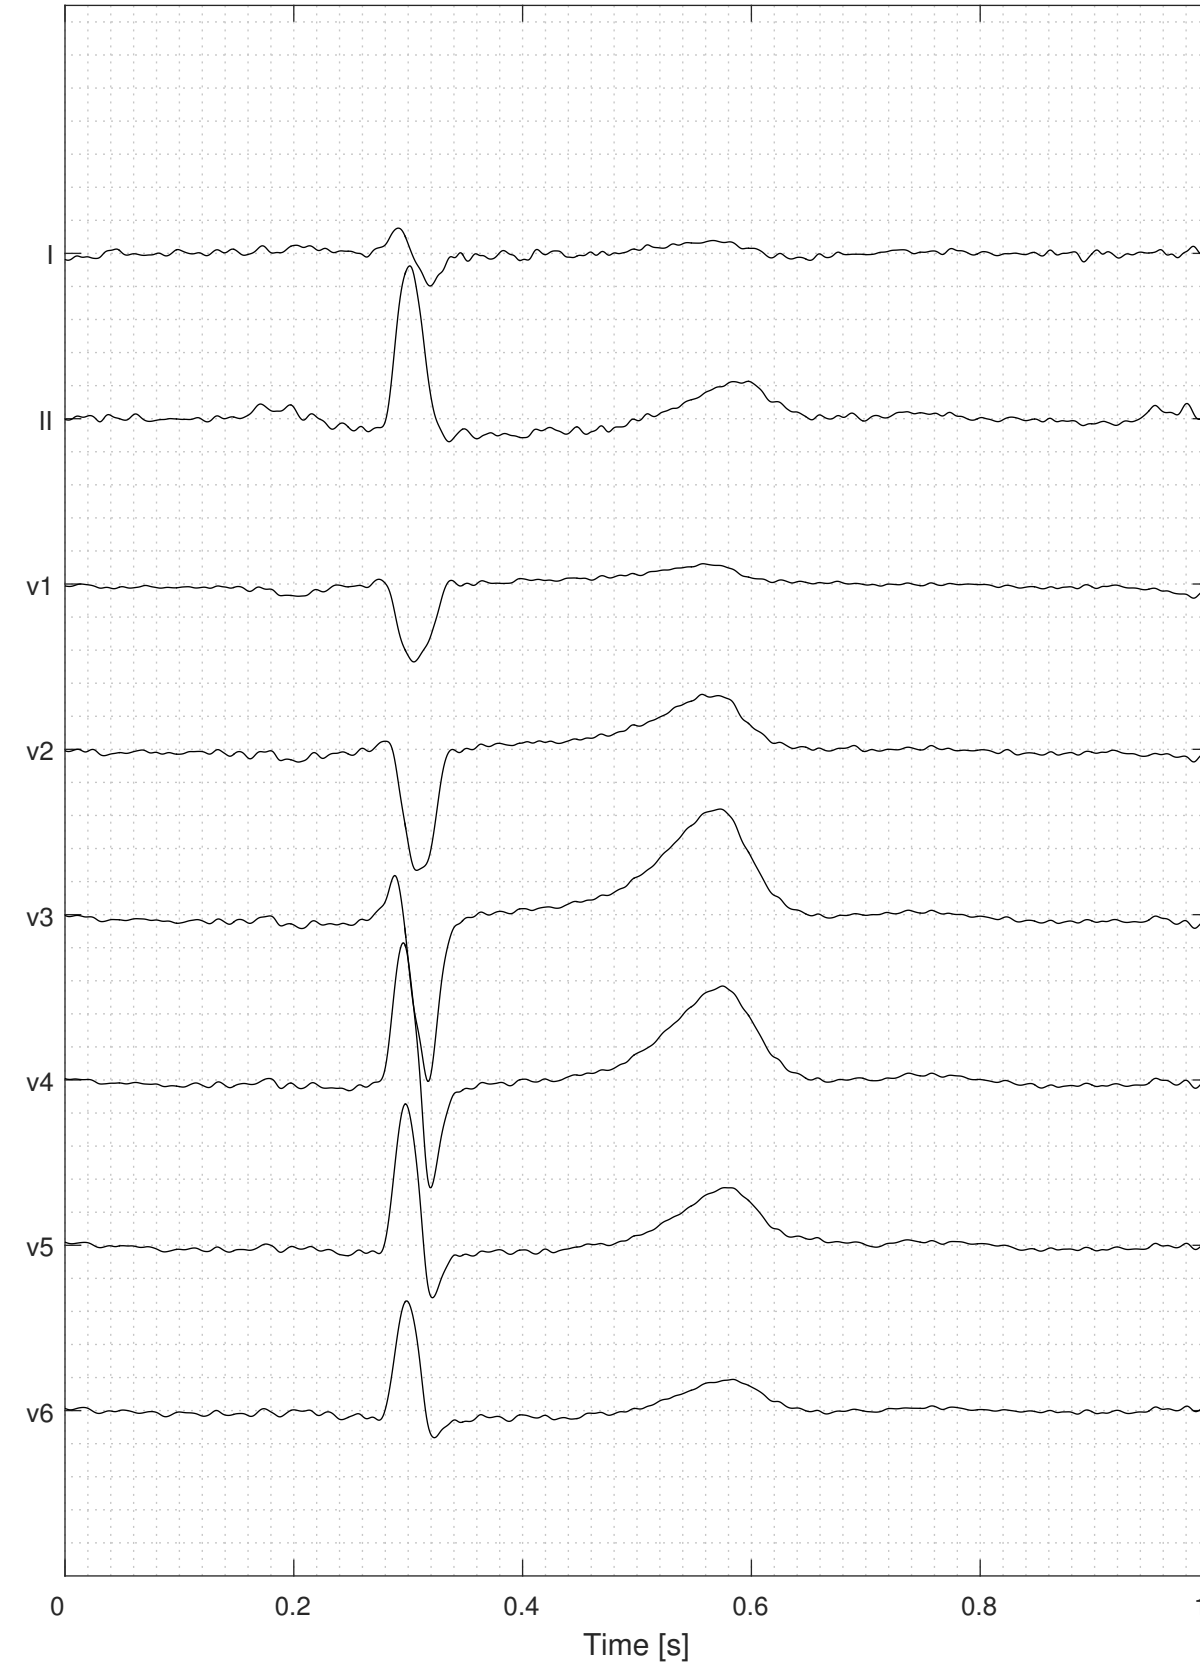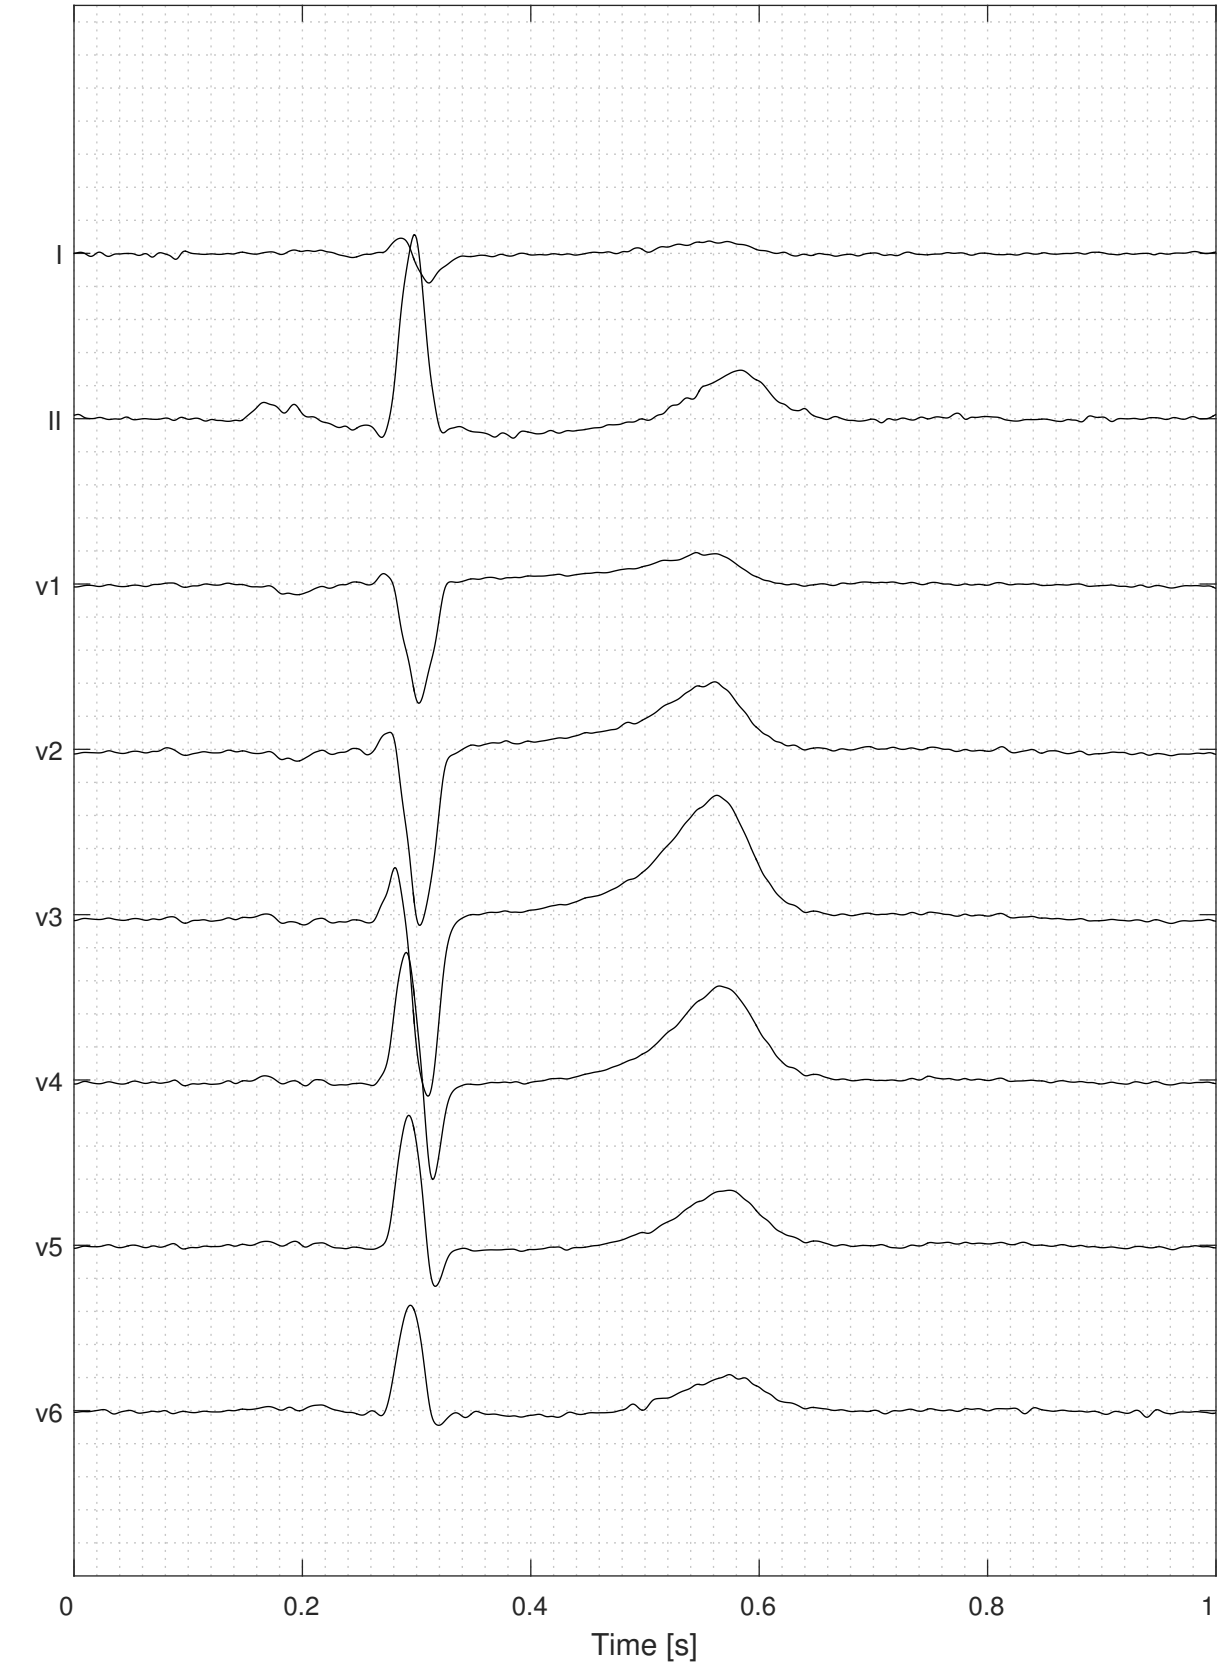

Patient 96

Low RR, Complex #: 280

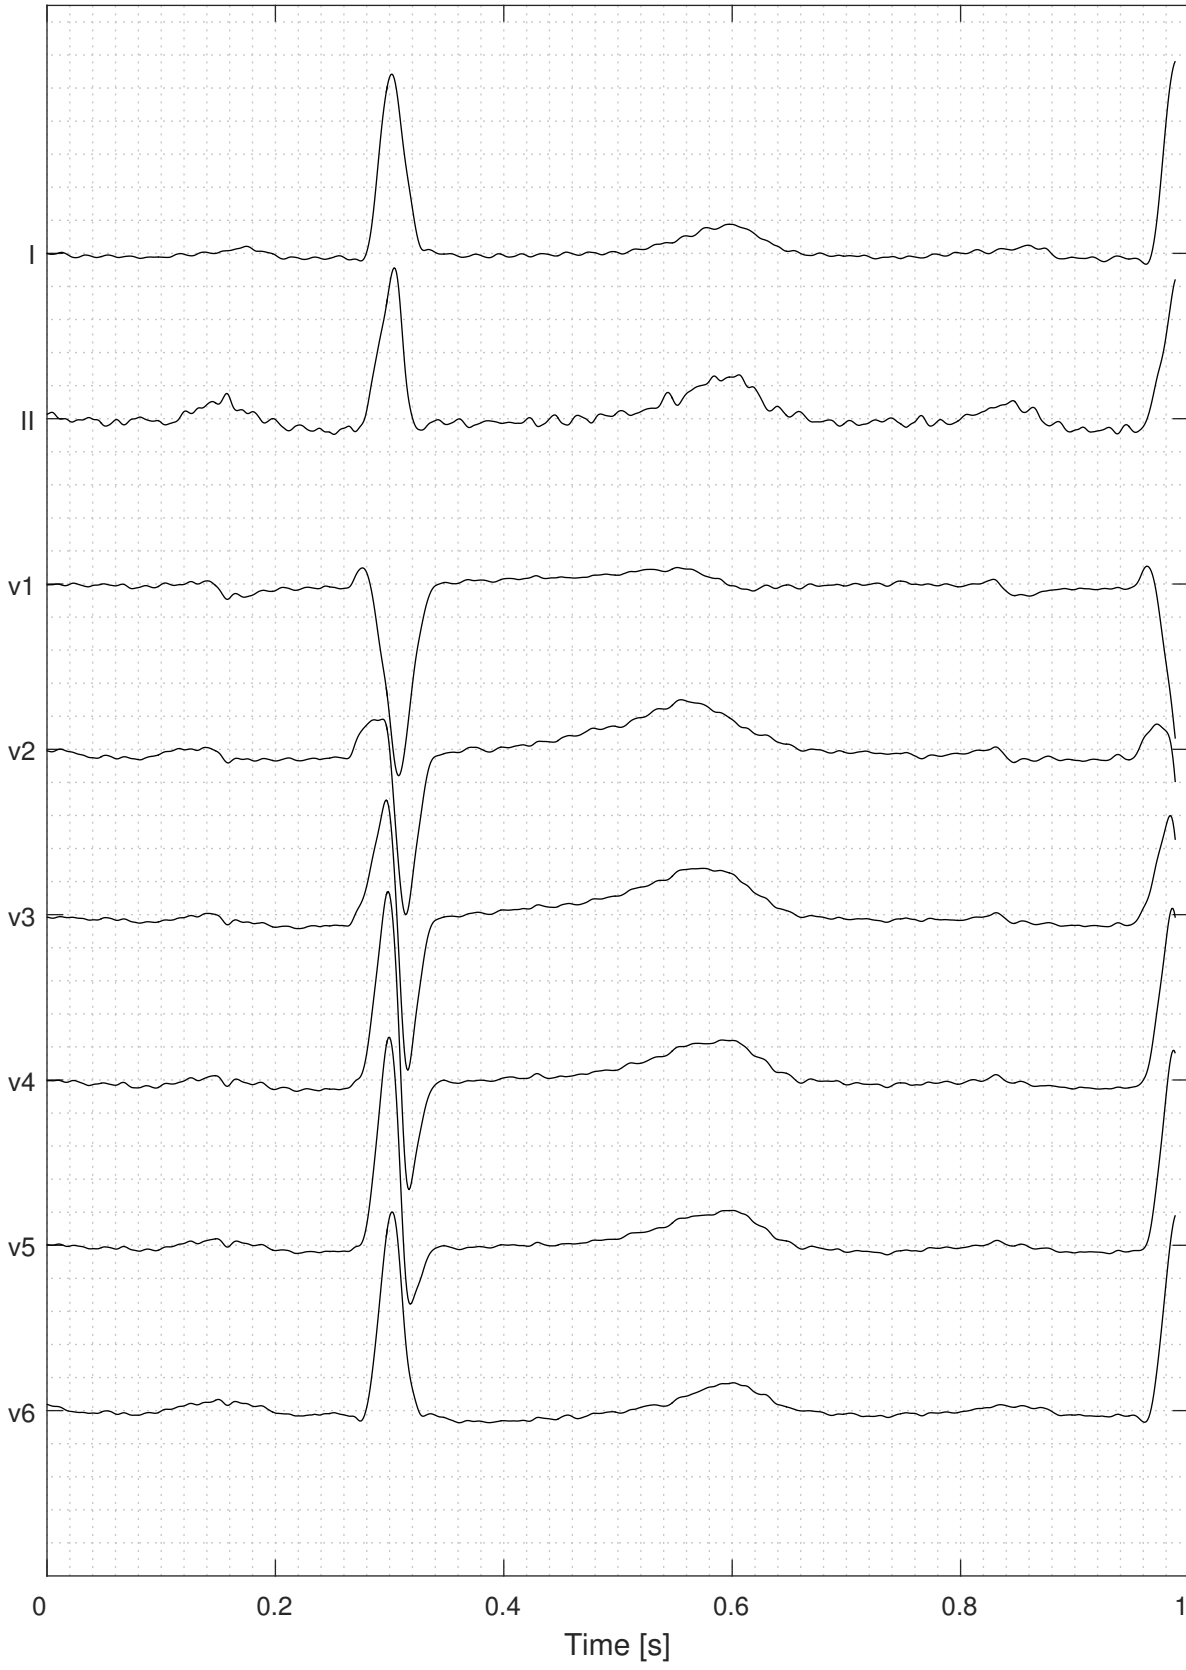

Mid RR, Complex #: 151

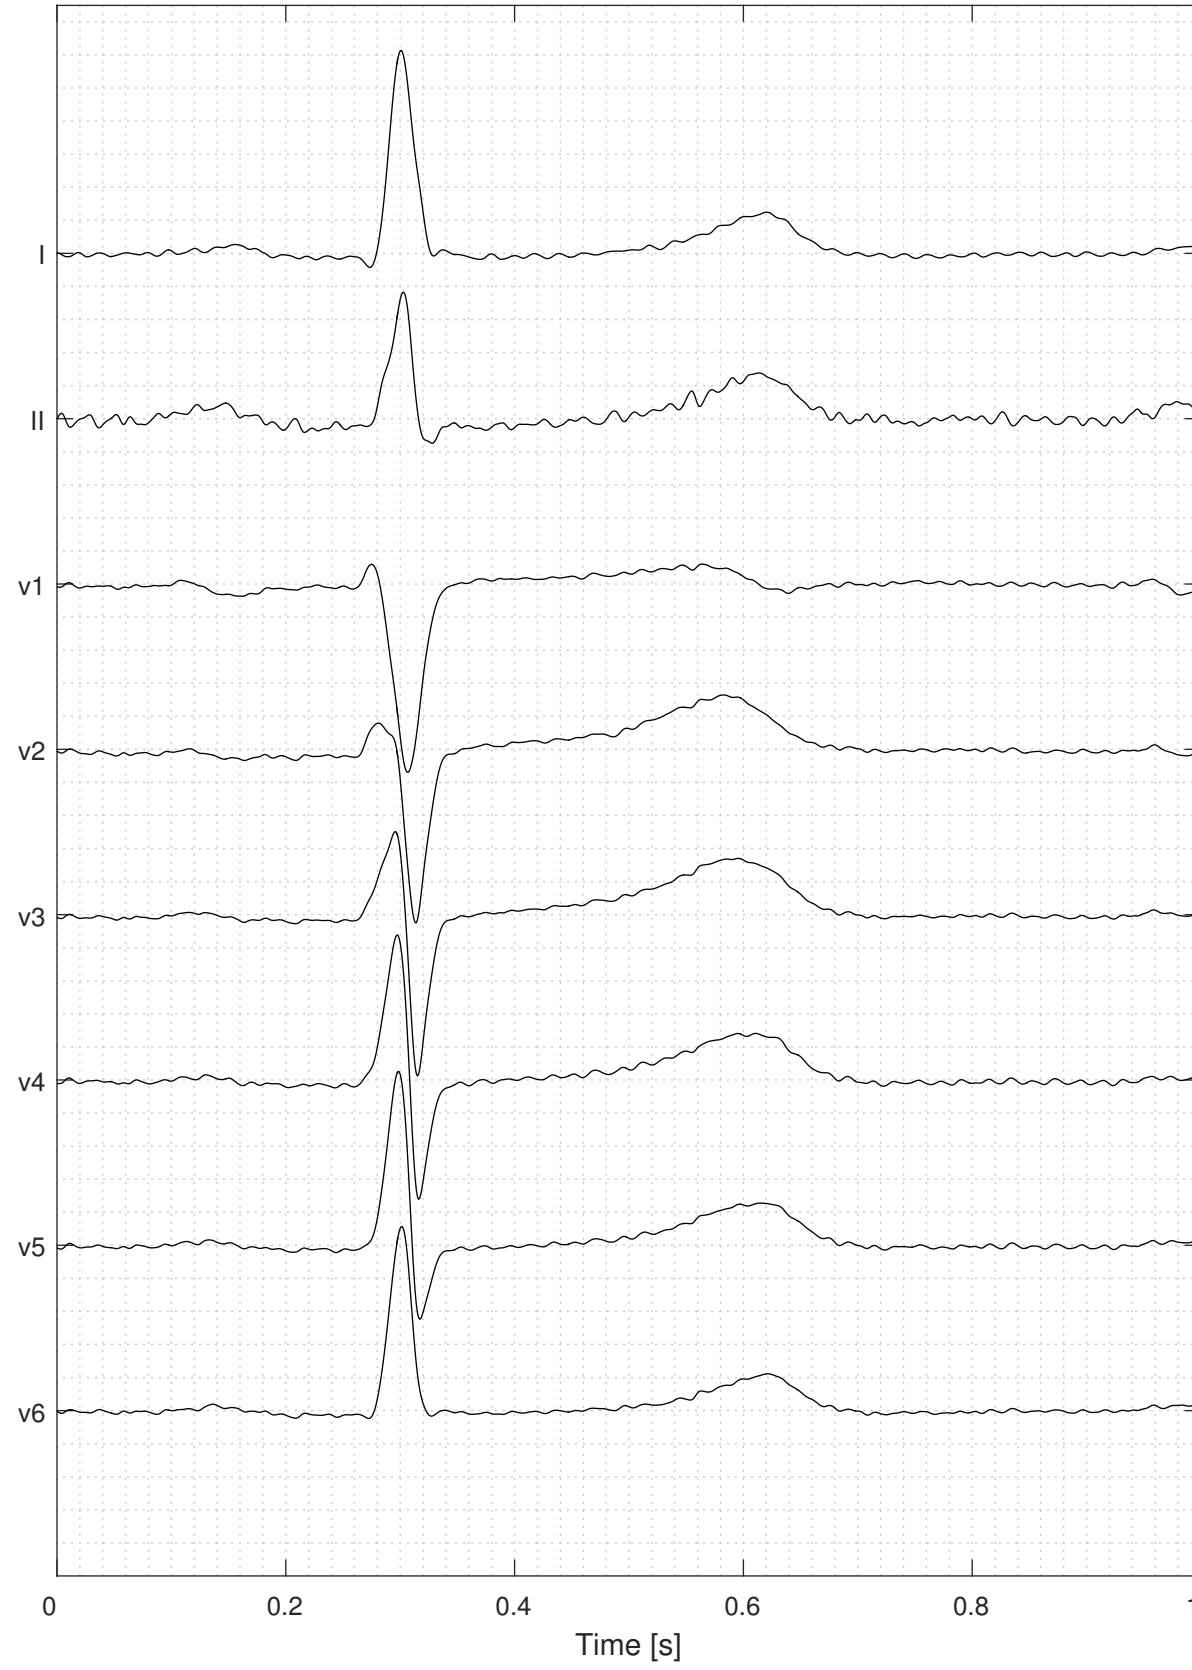

High RR, Complex #: 14

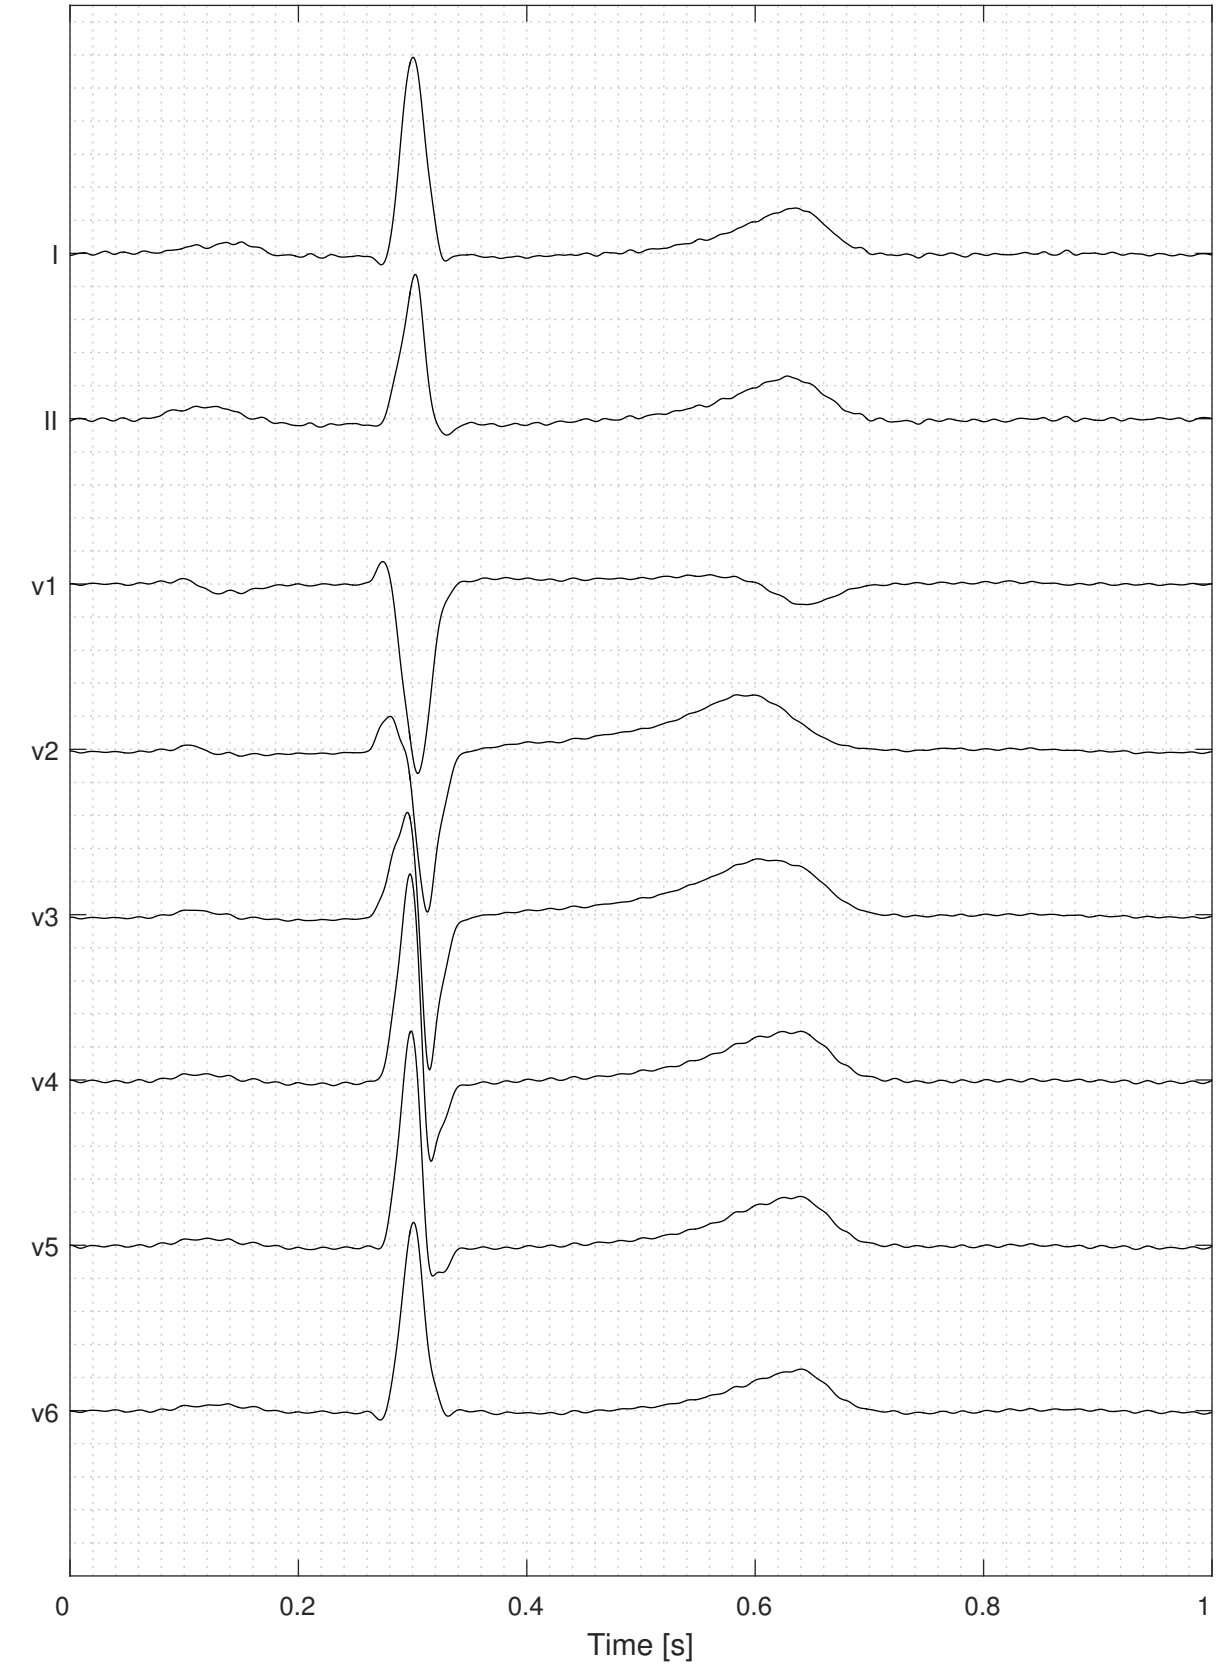



Patient 97

Low RR, Complex #: 196

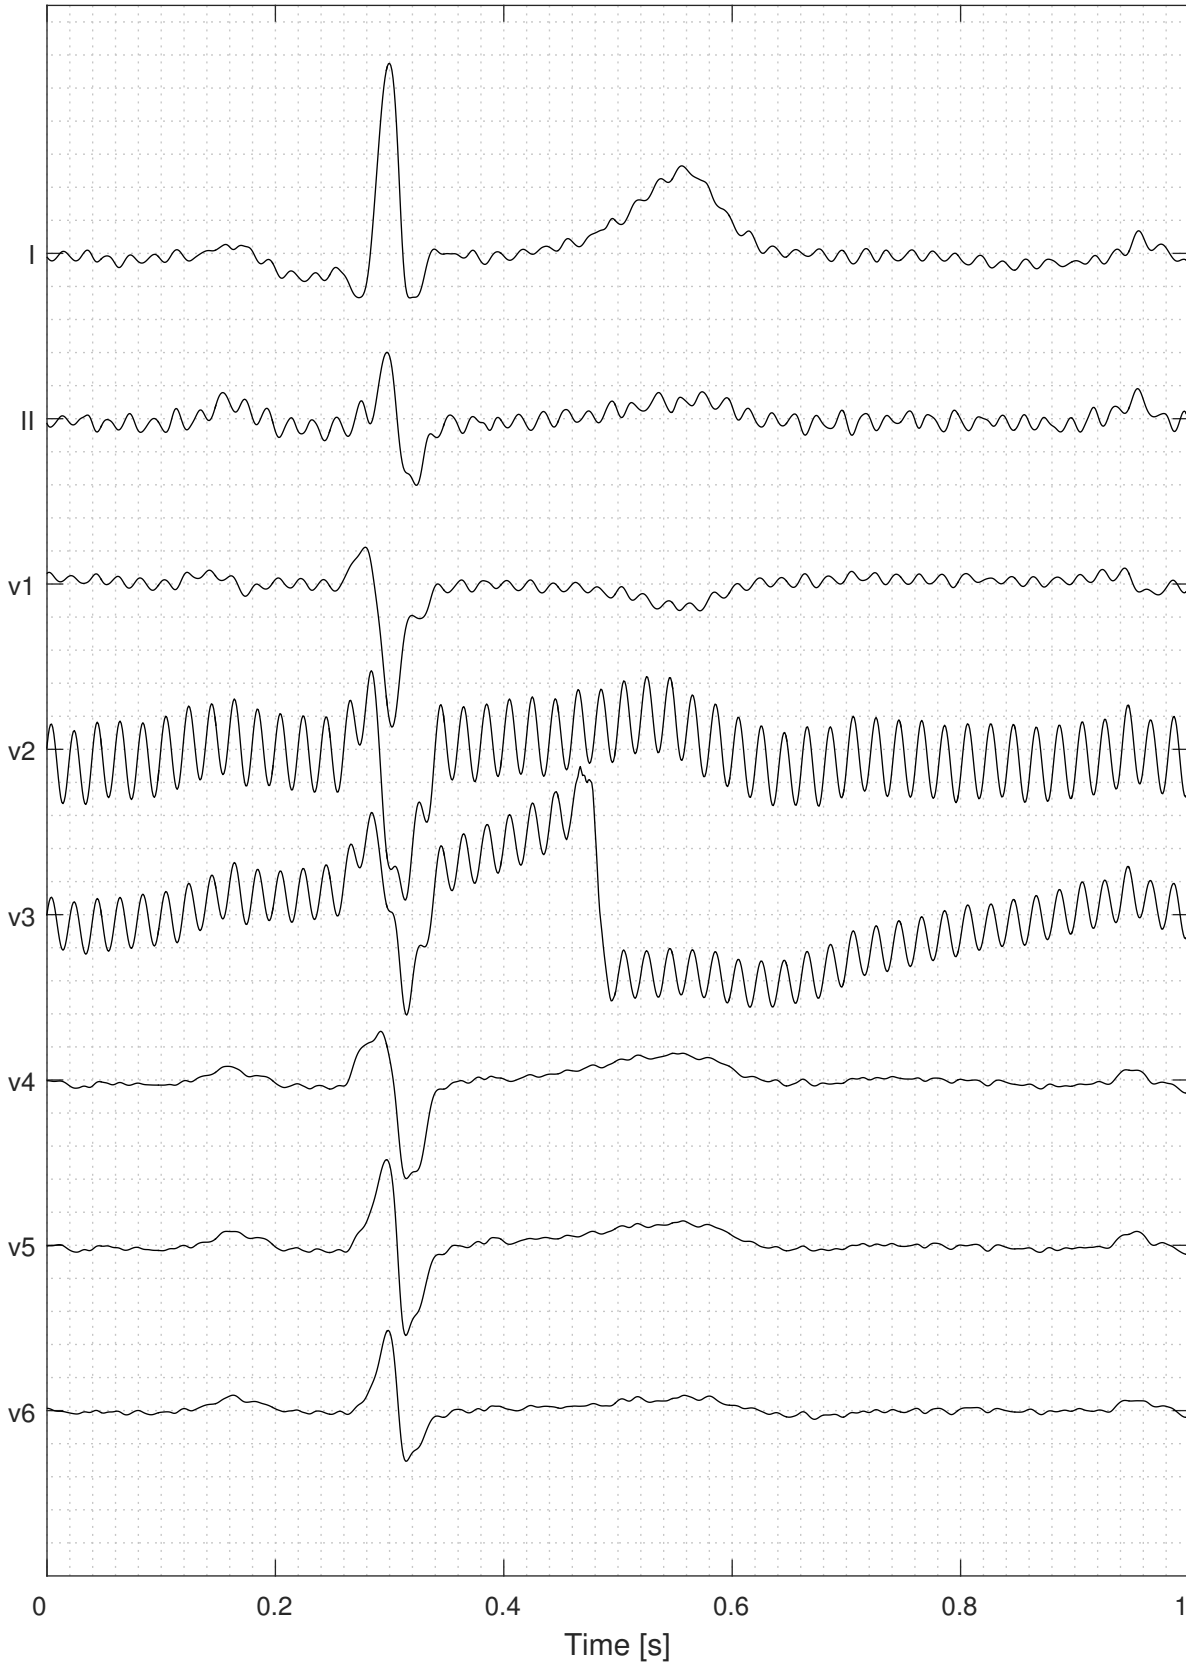

Mid RR, Complex #: 221

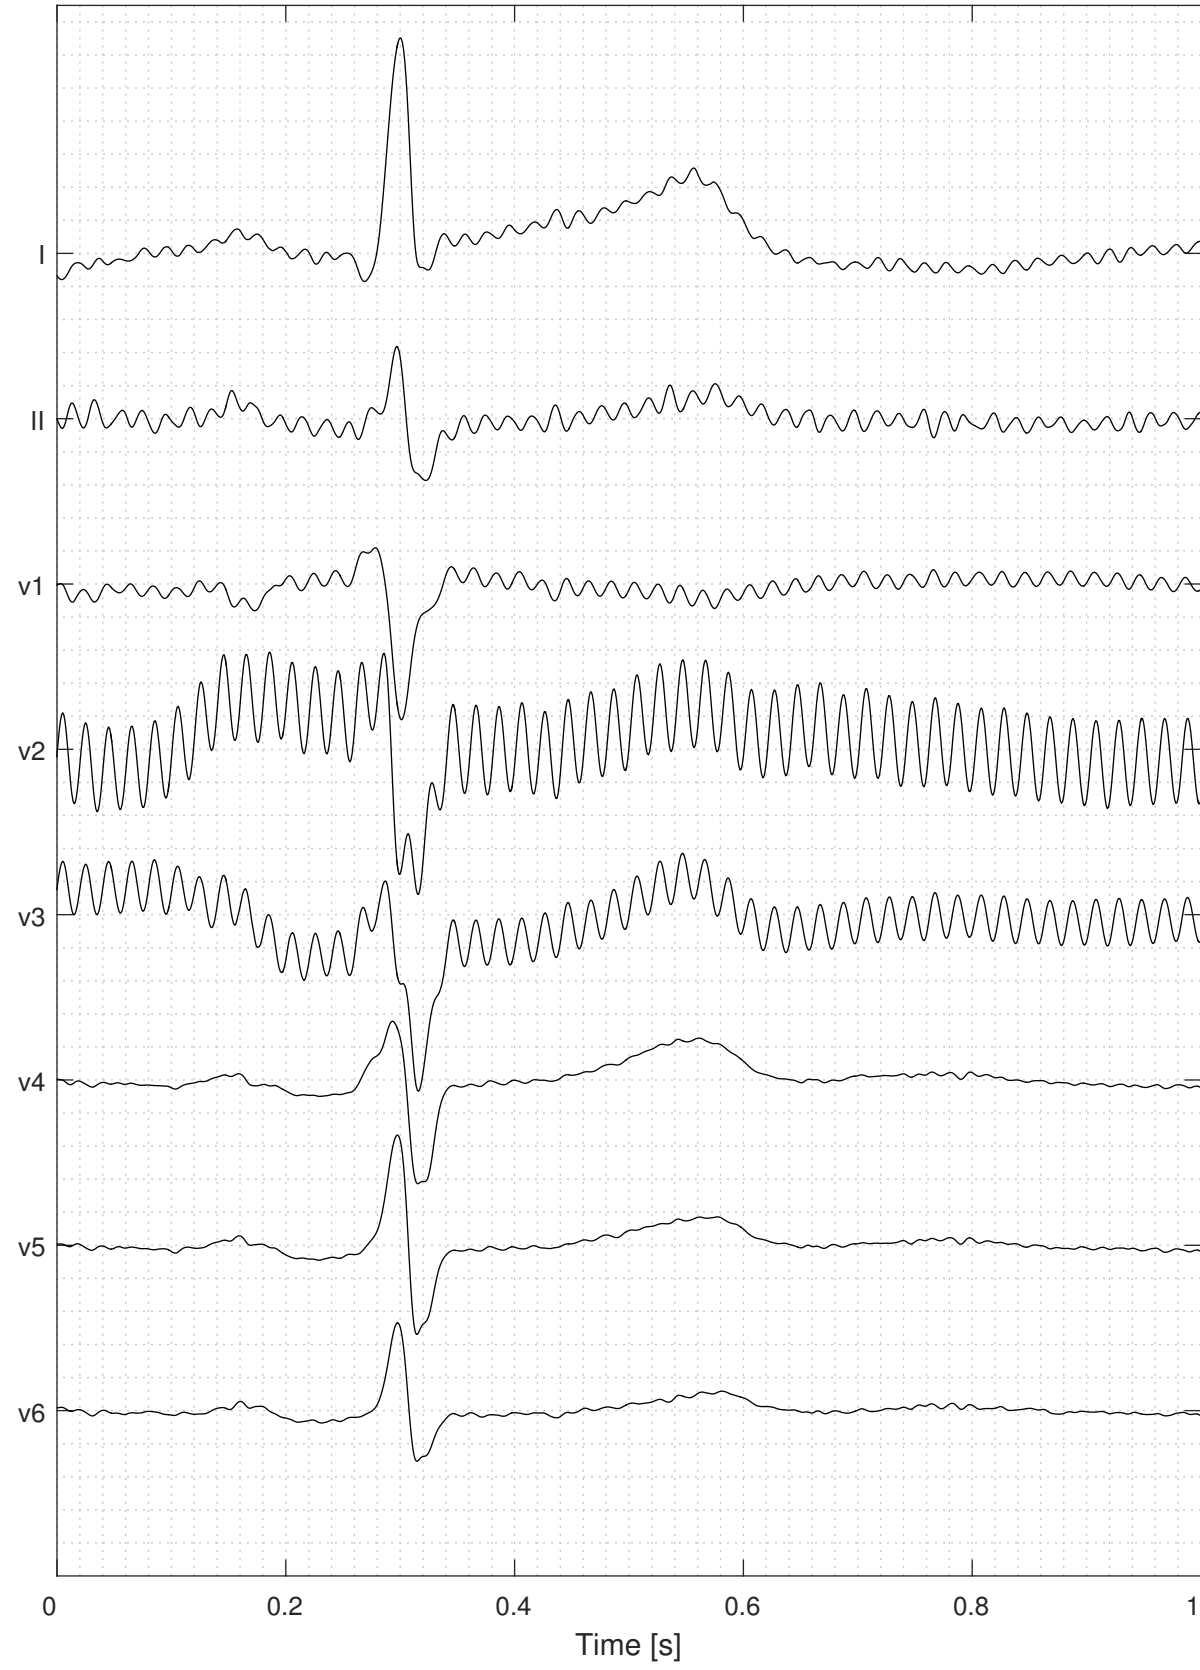

High RR, Complex #: 33

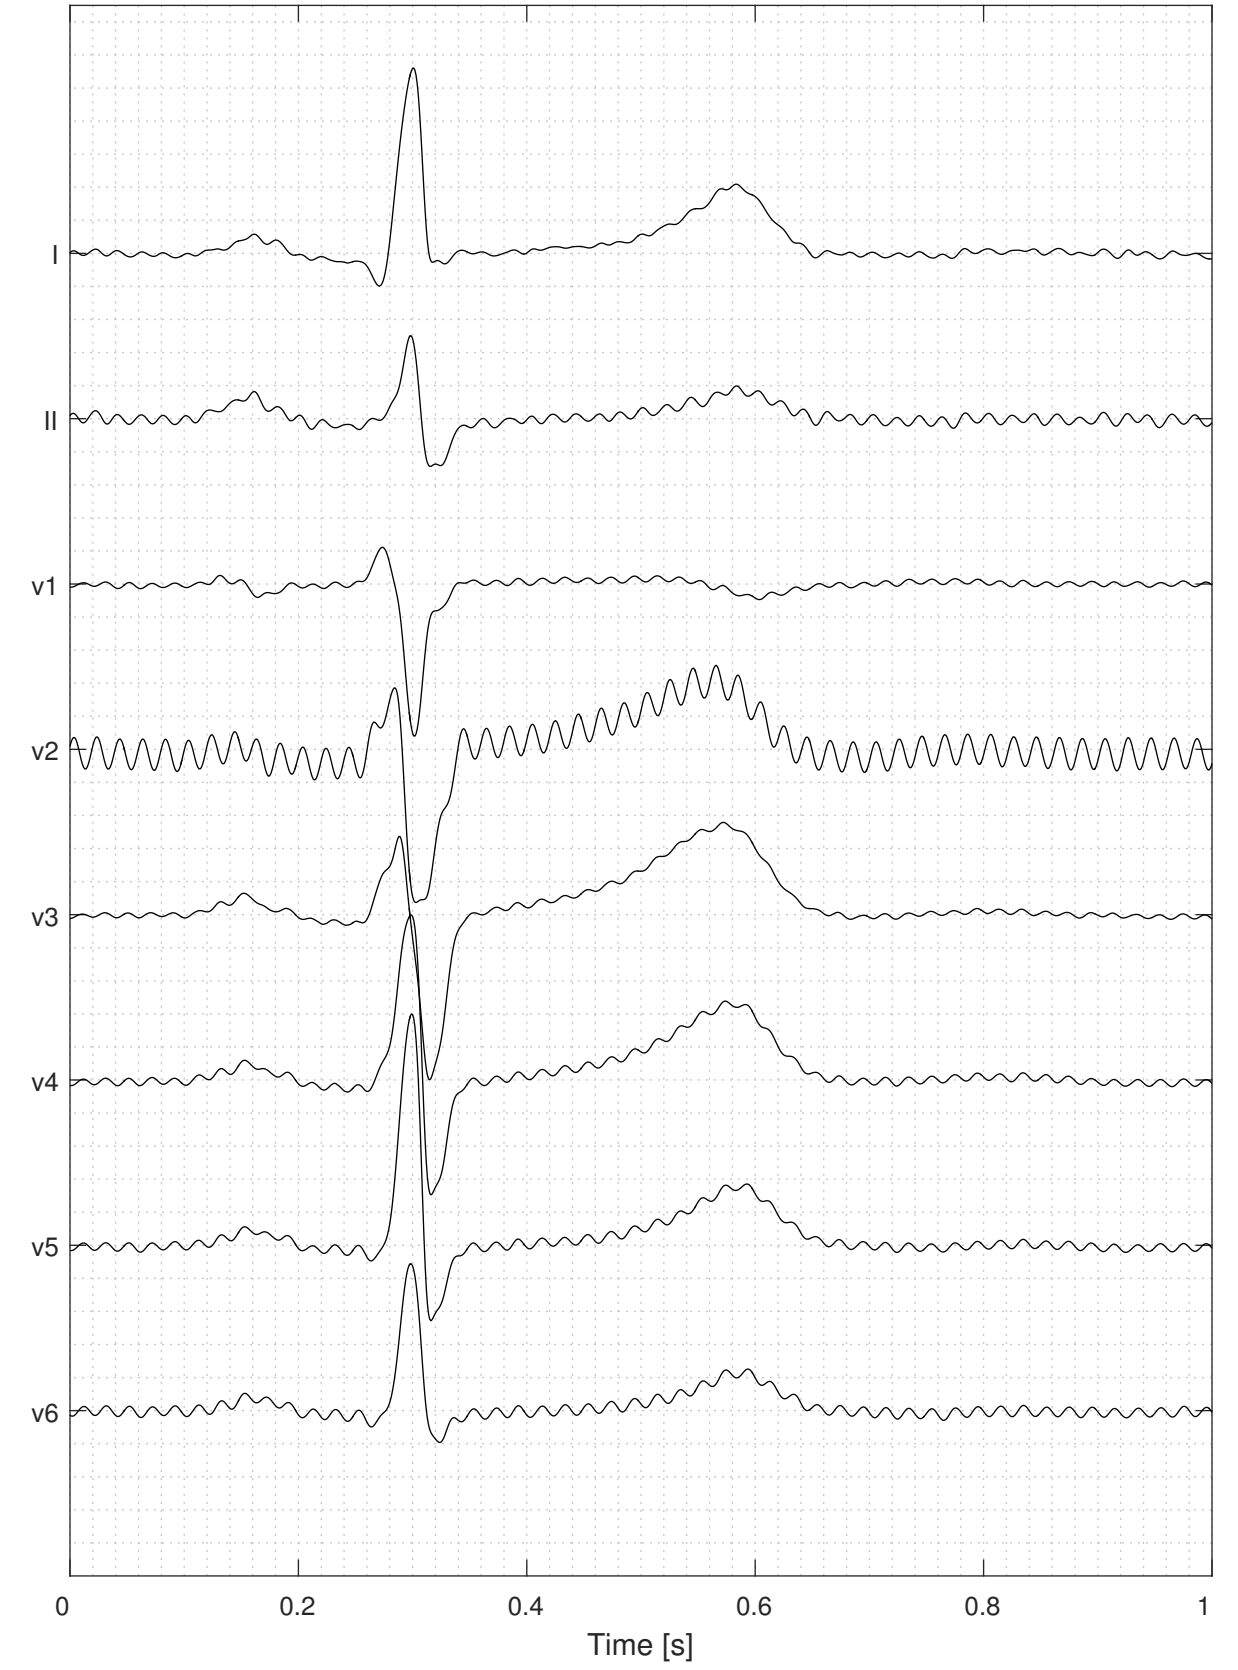

Patient 98

Low RR, Complex #: 259

Mid RR, Complex #: 94

High RR, Complex #: 2

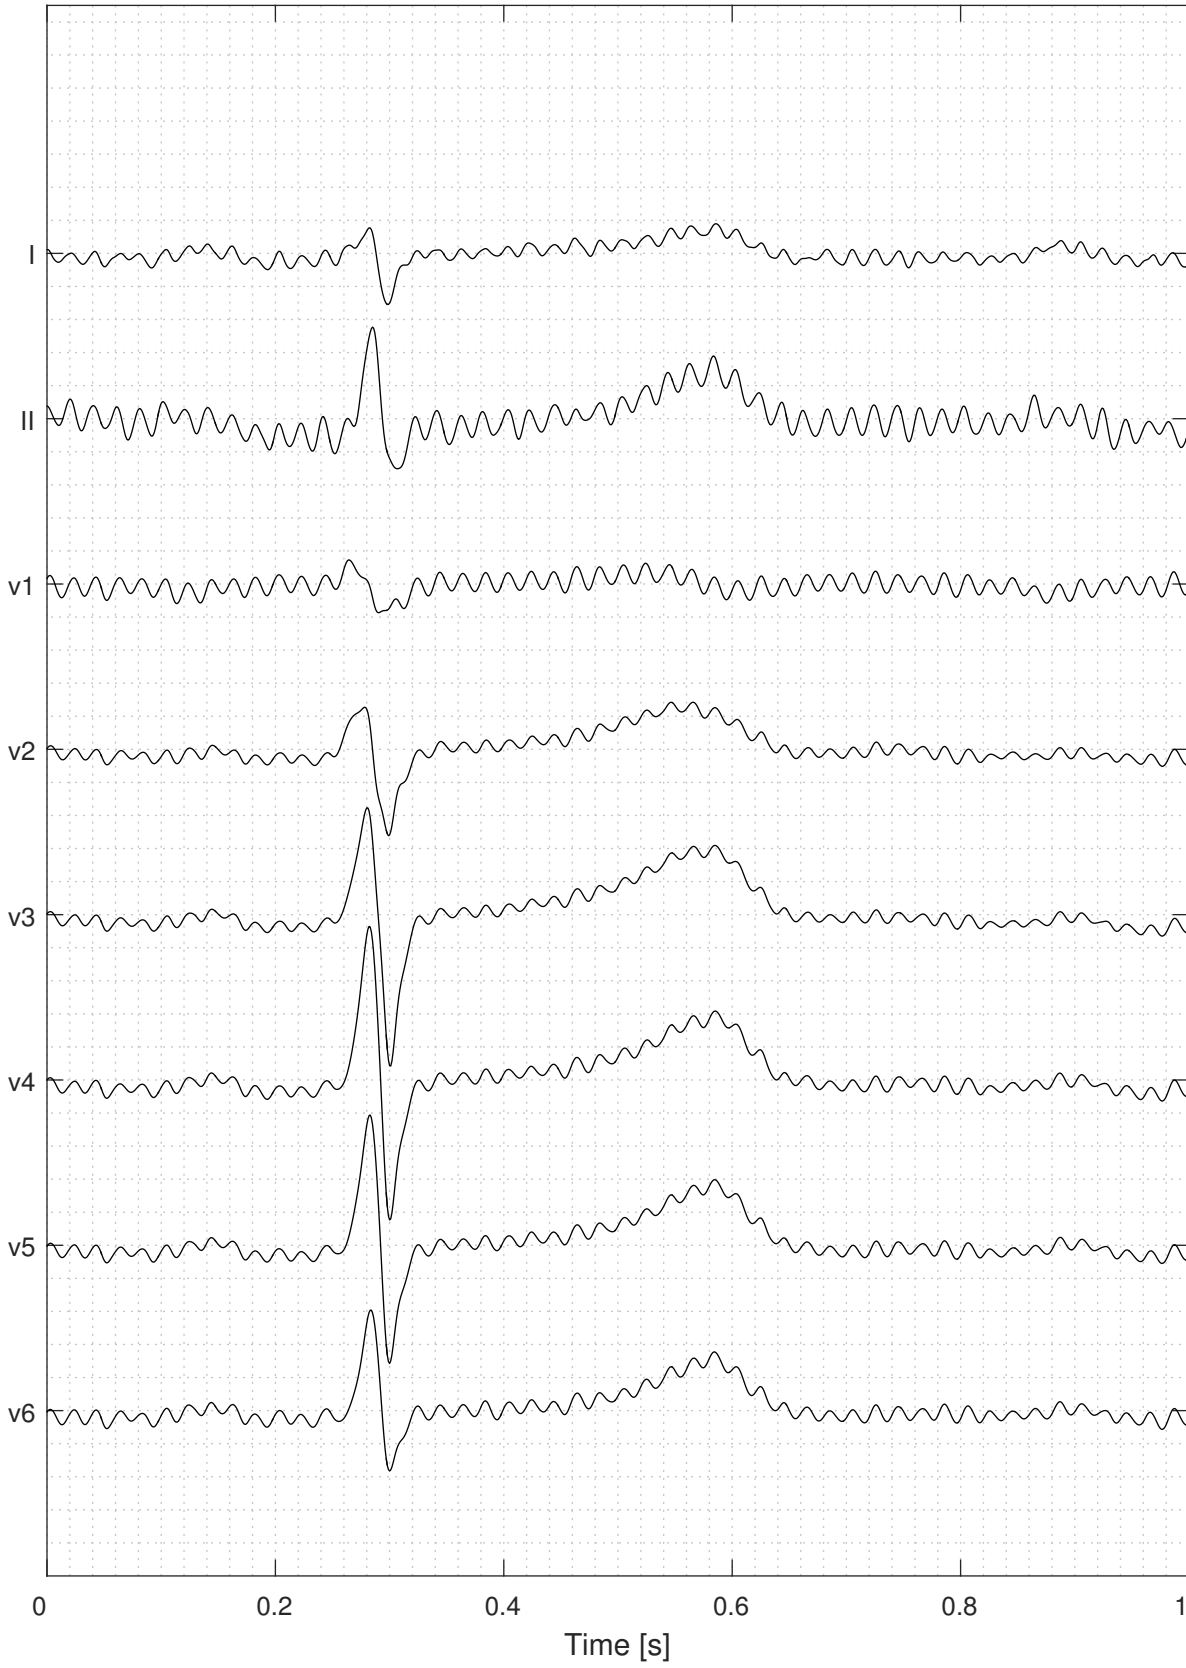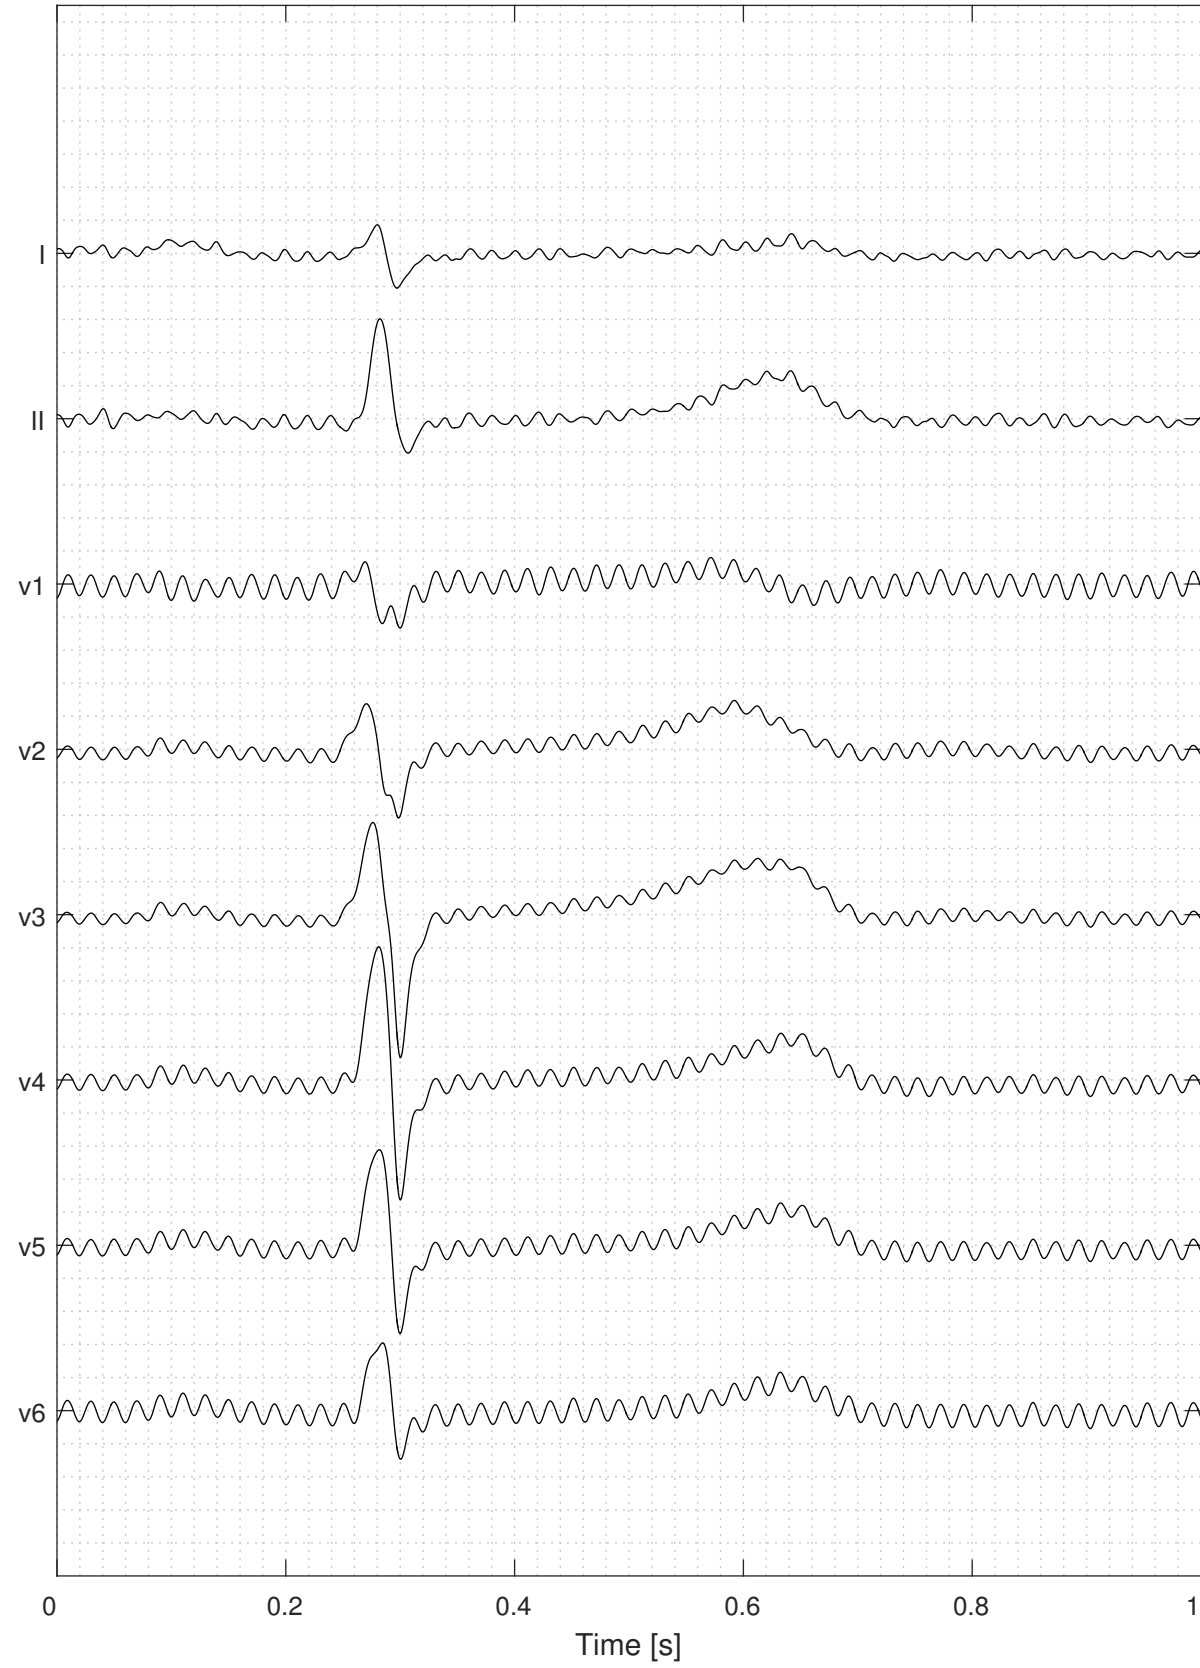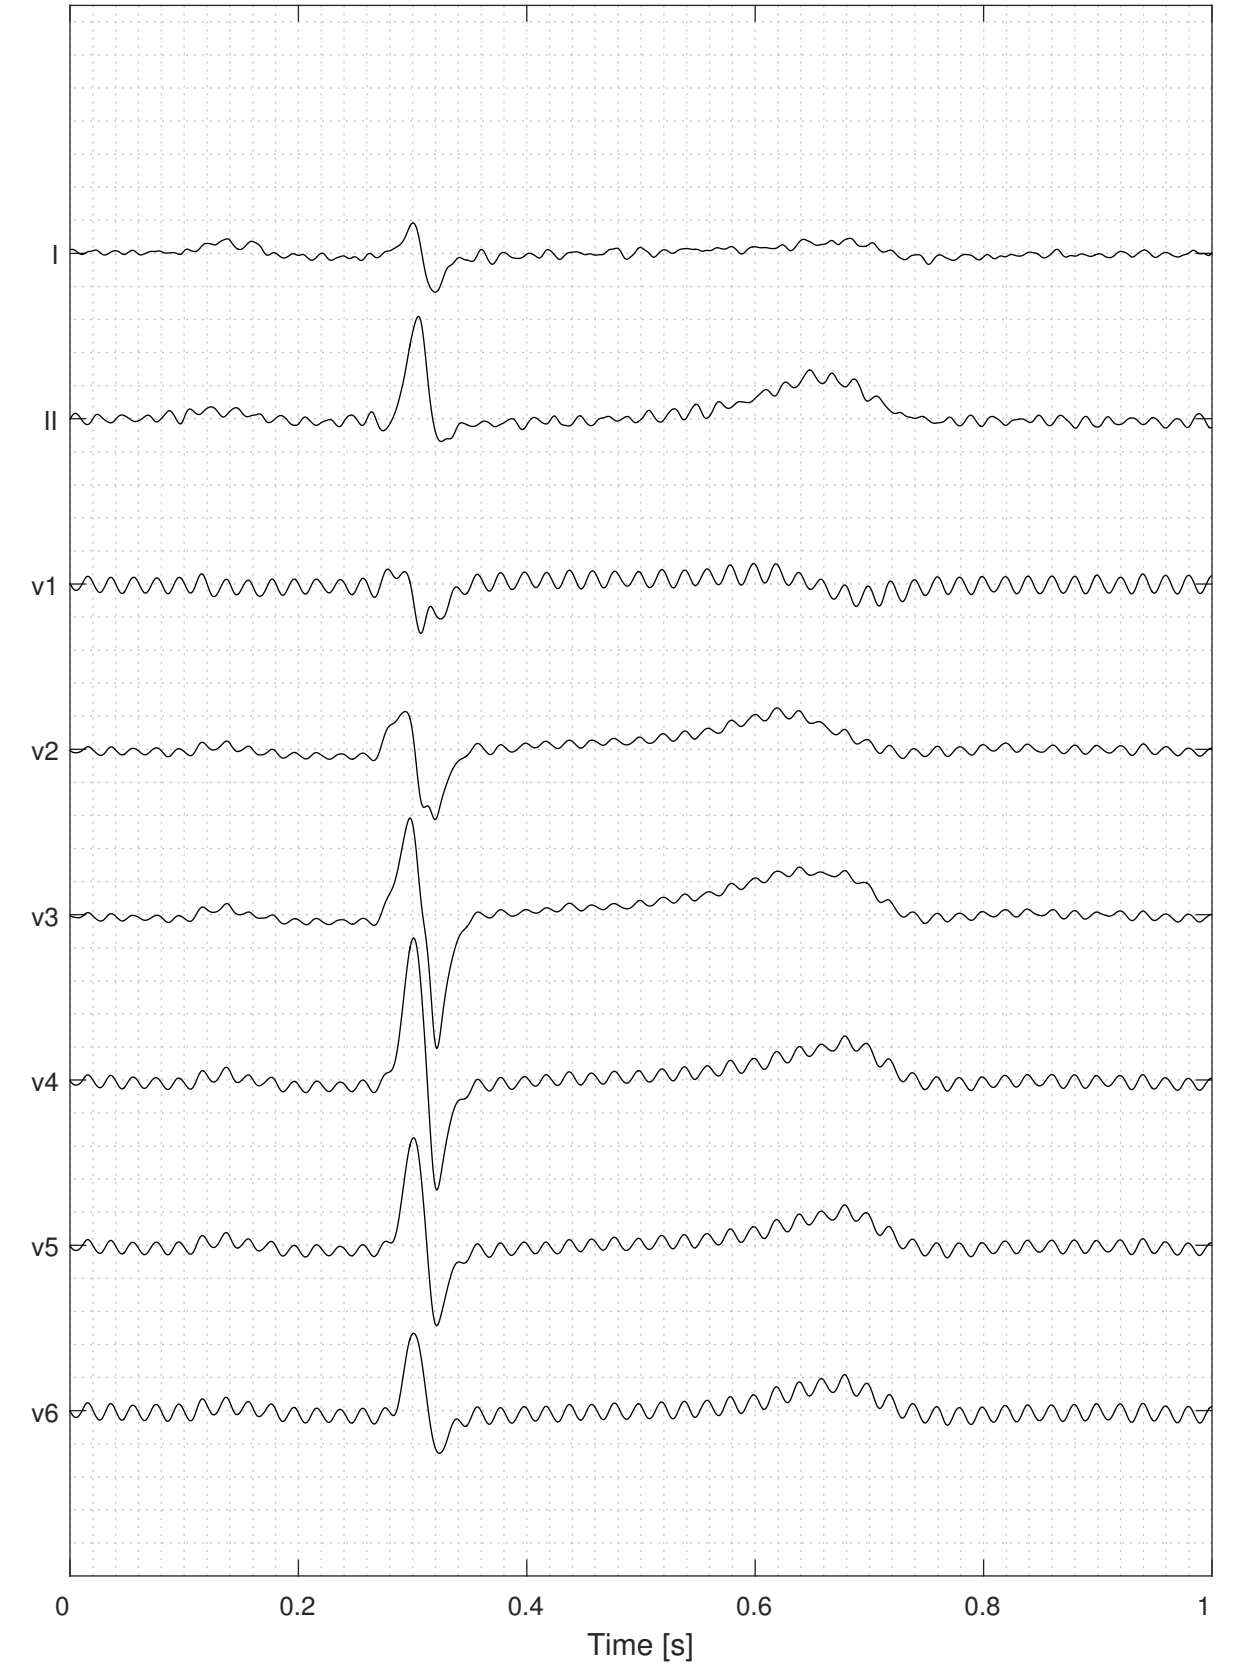

Patient 99

Low RR, Complex #: 122

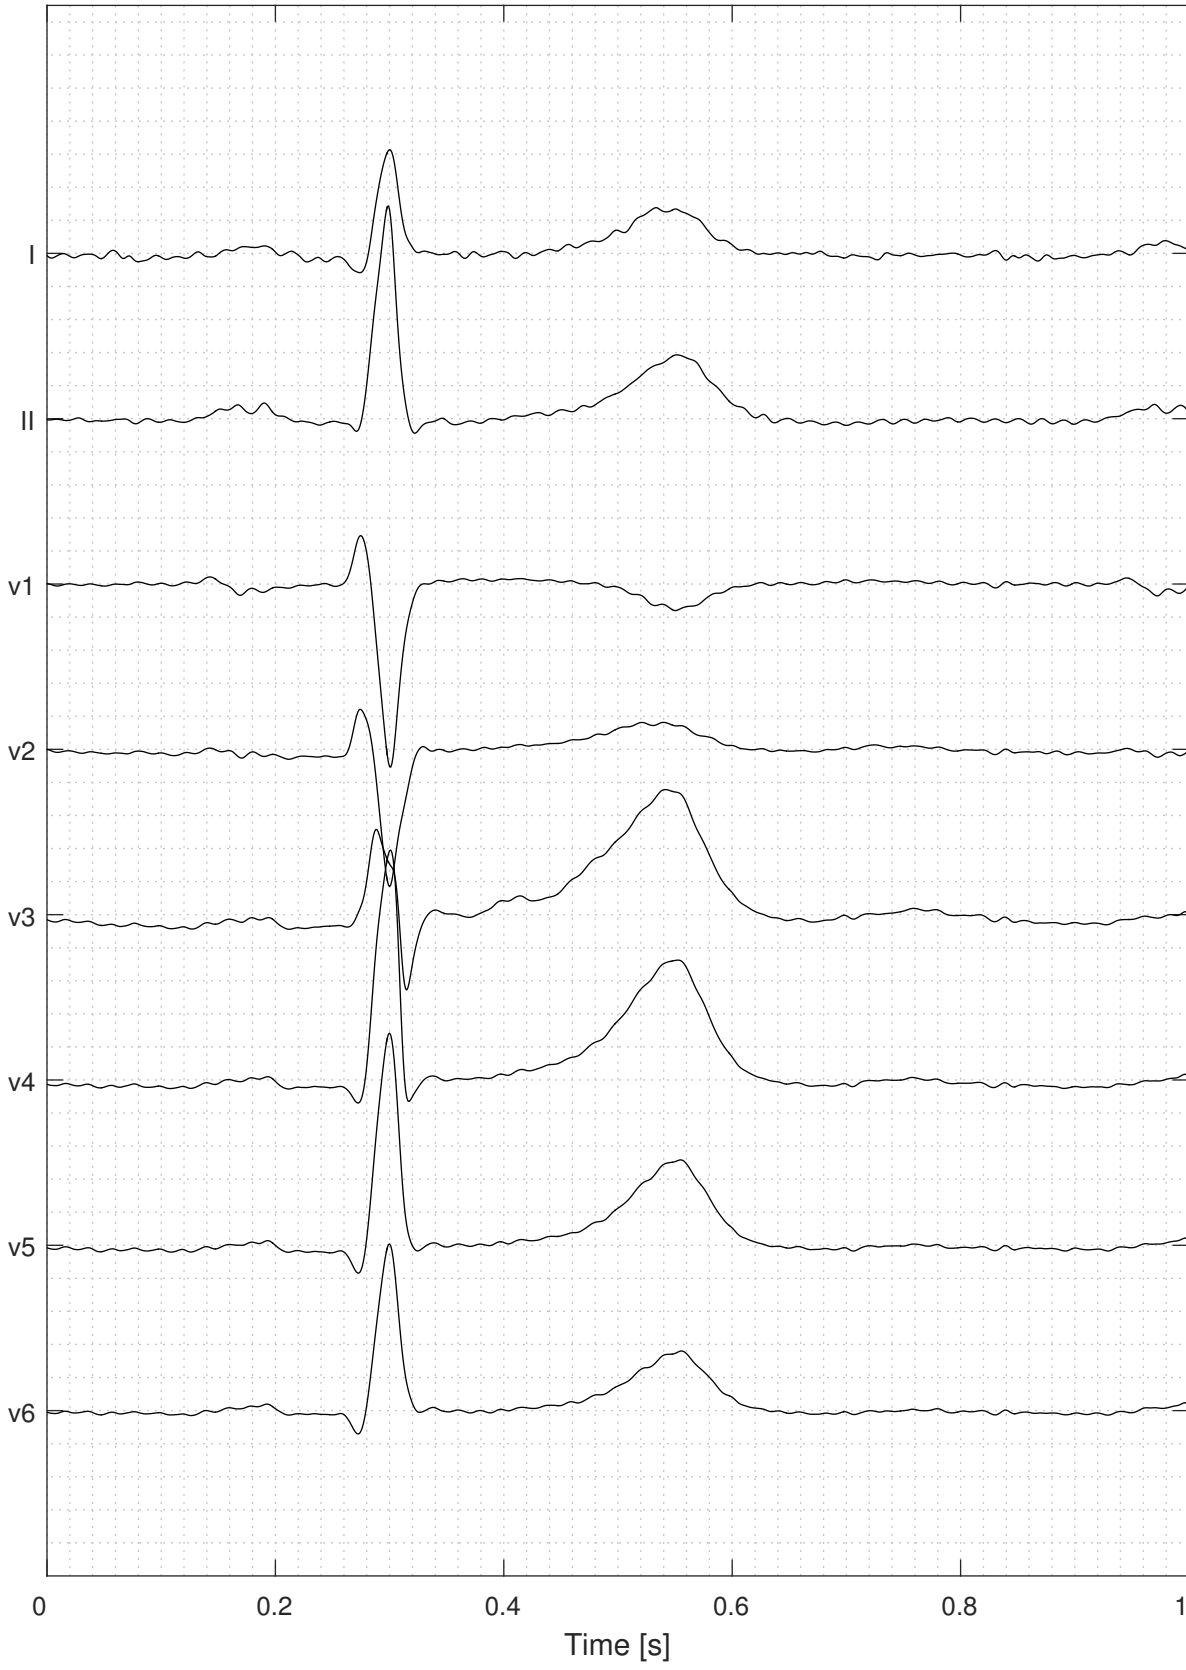

Mid RR, Complex #: 72

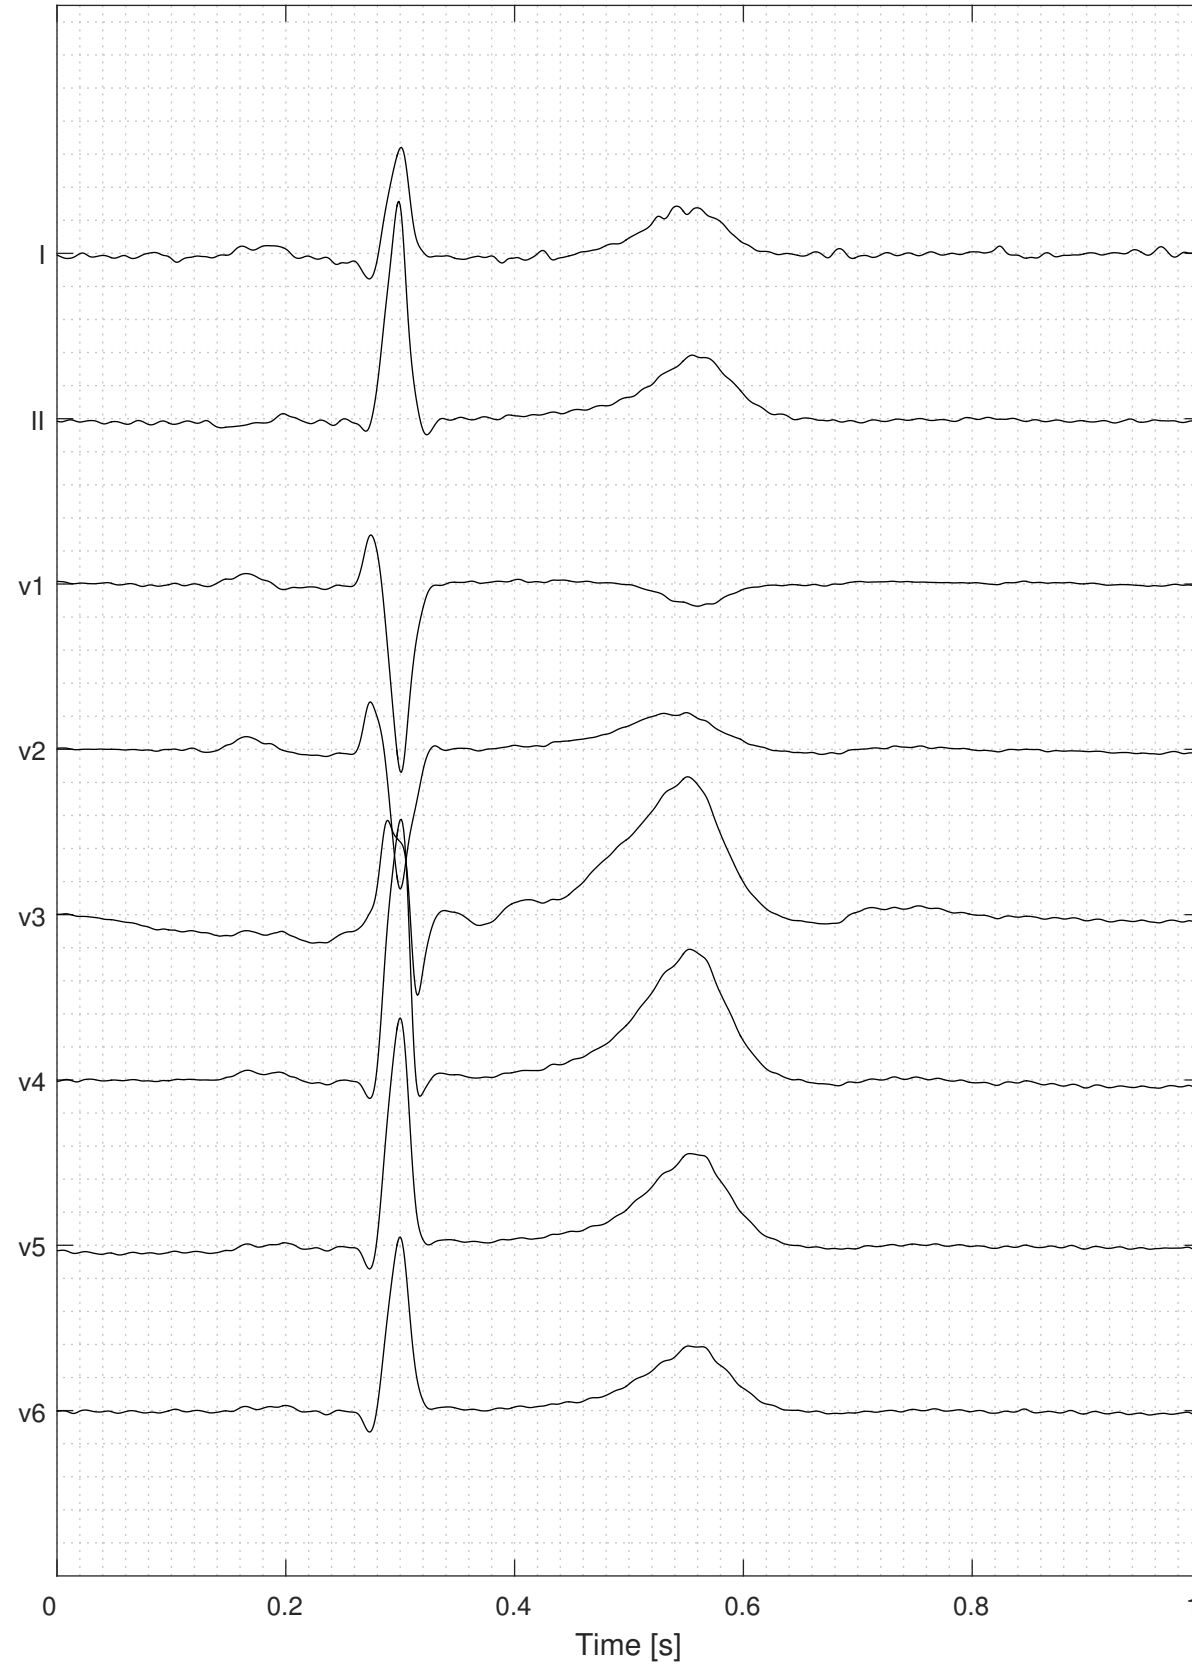

High RR, Complex #: 205

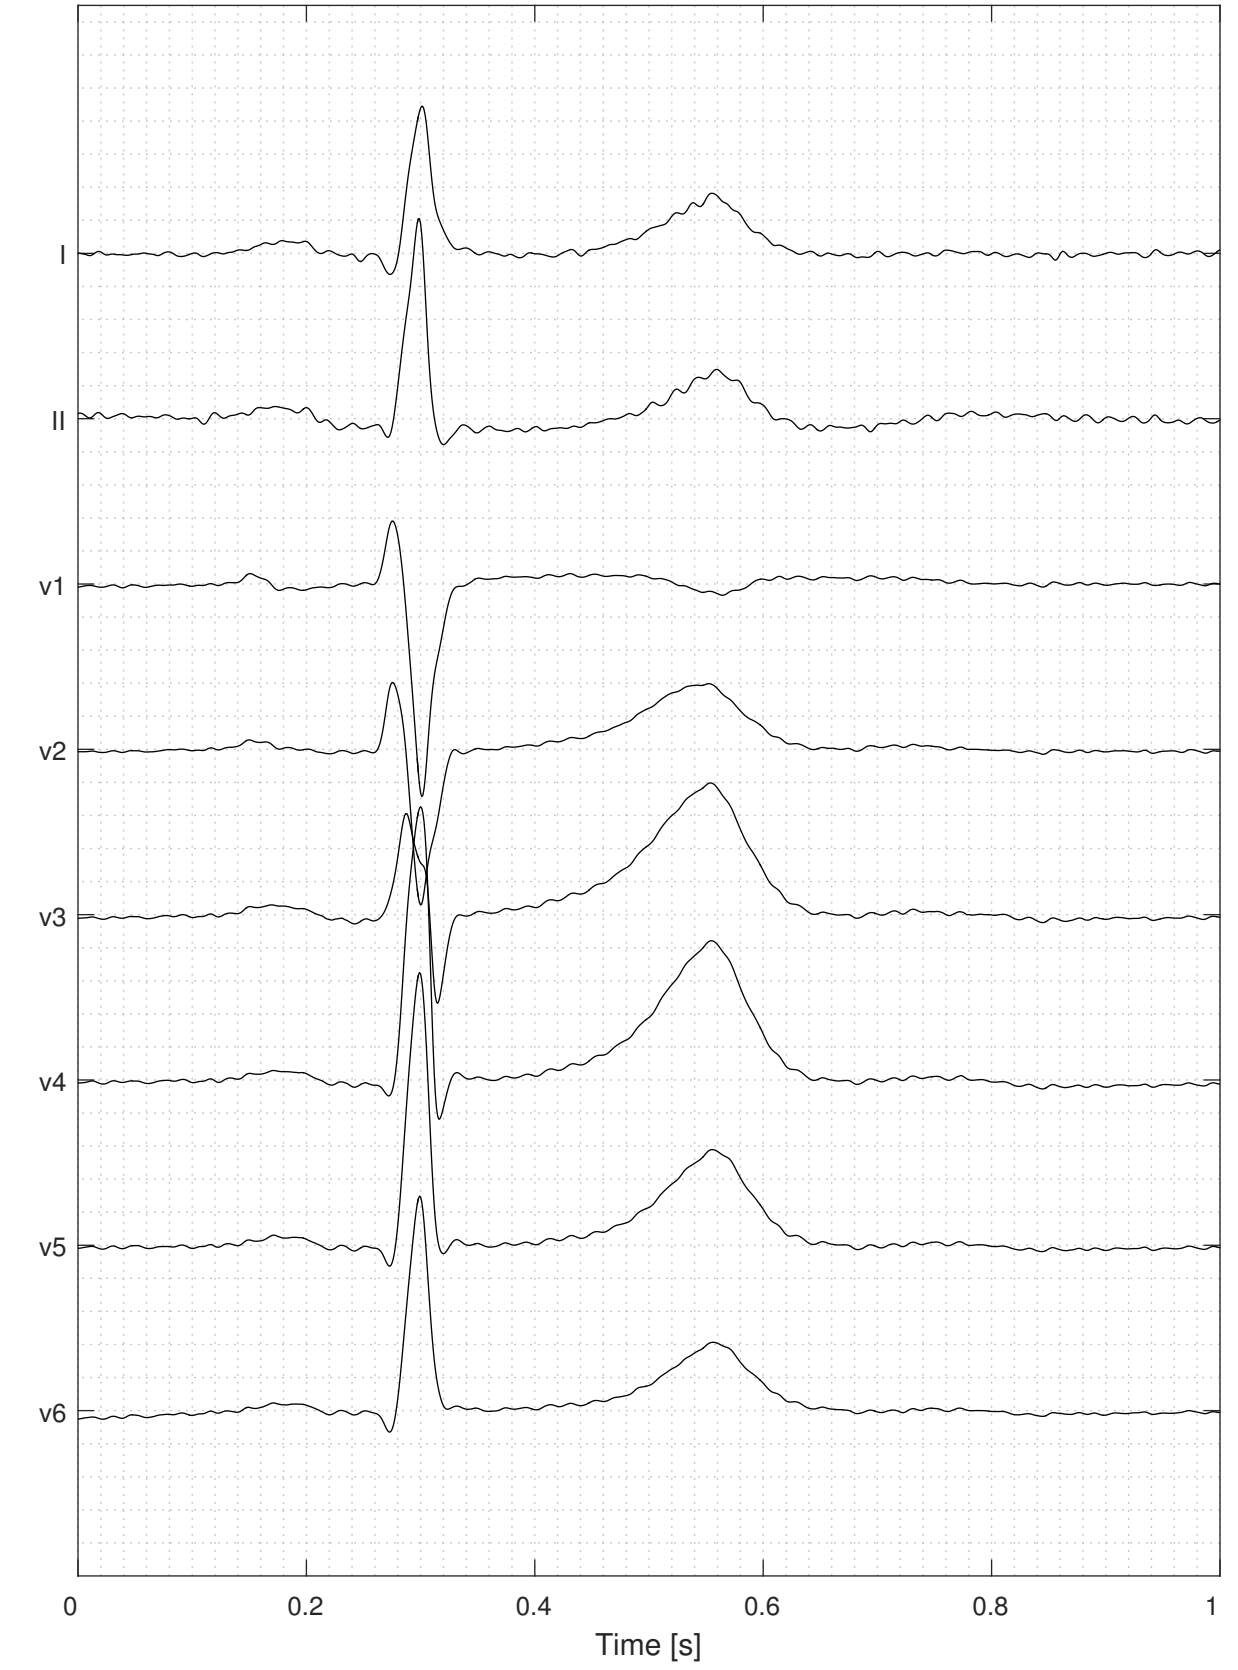

Patient 100

Low RR, Complex #: 304

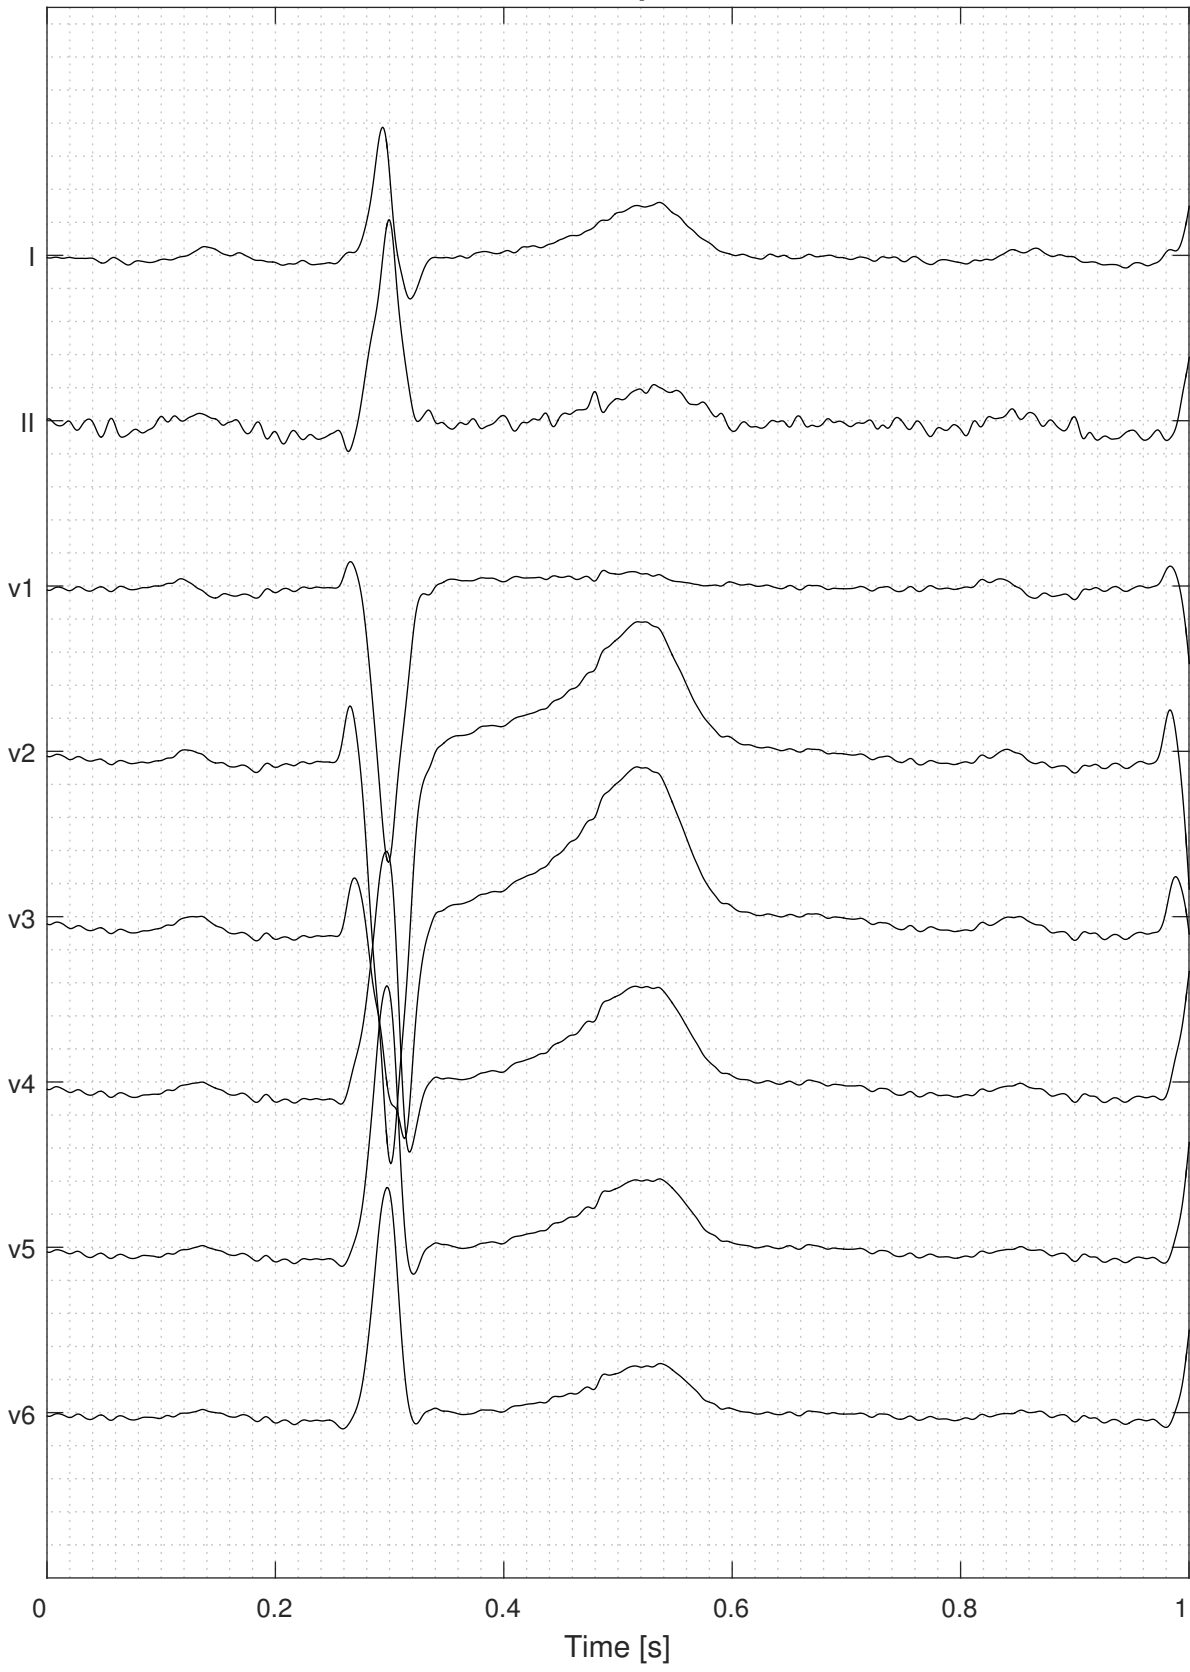

Mid RR, Complex #: 343

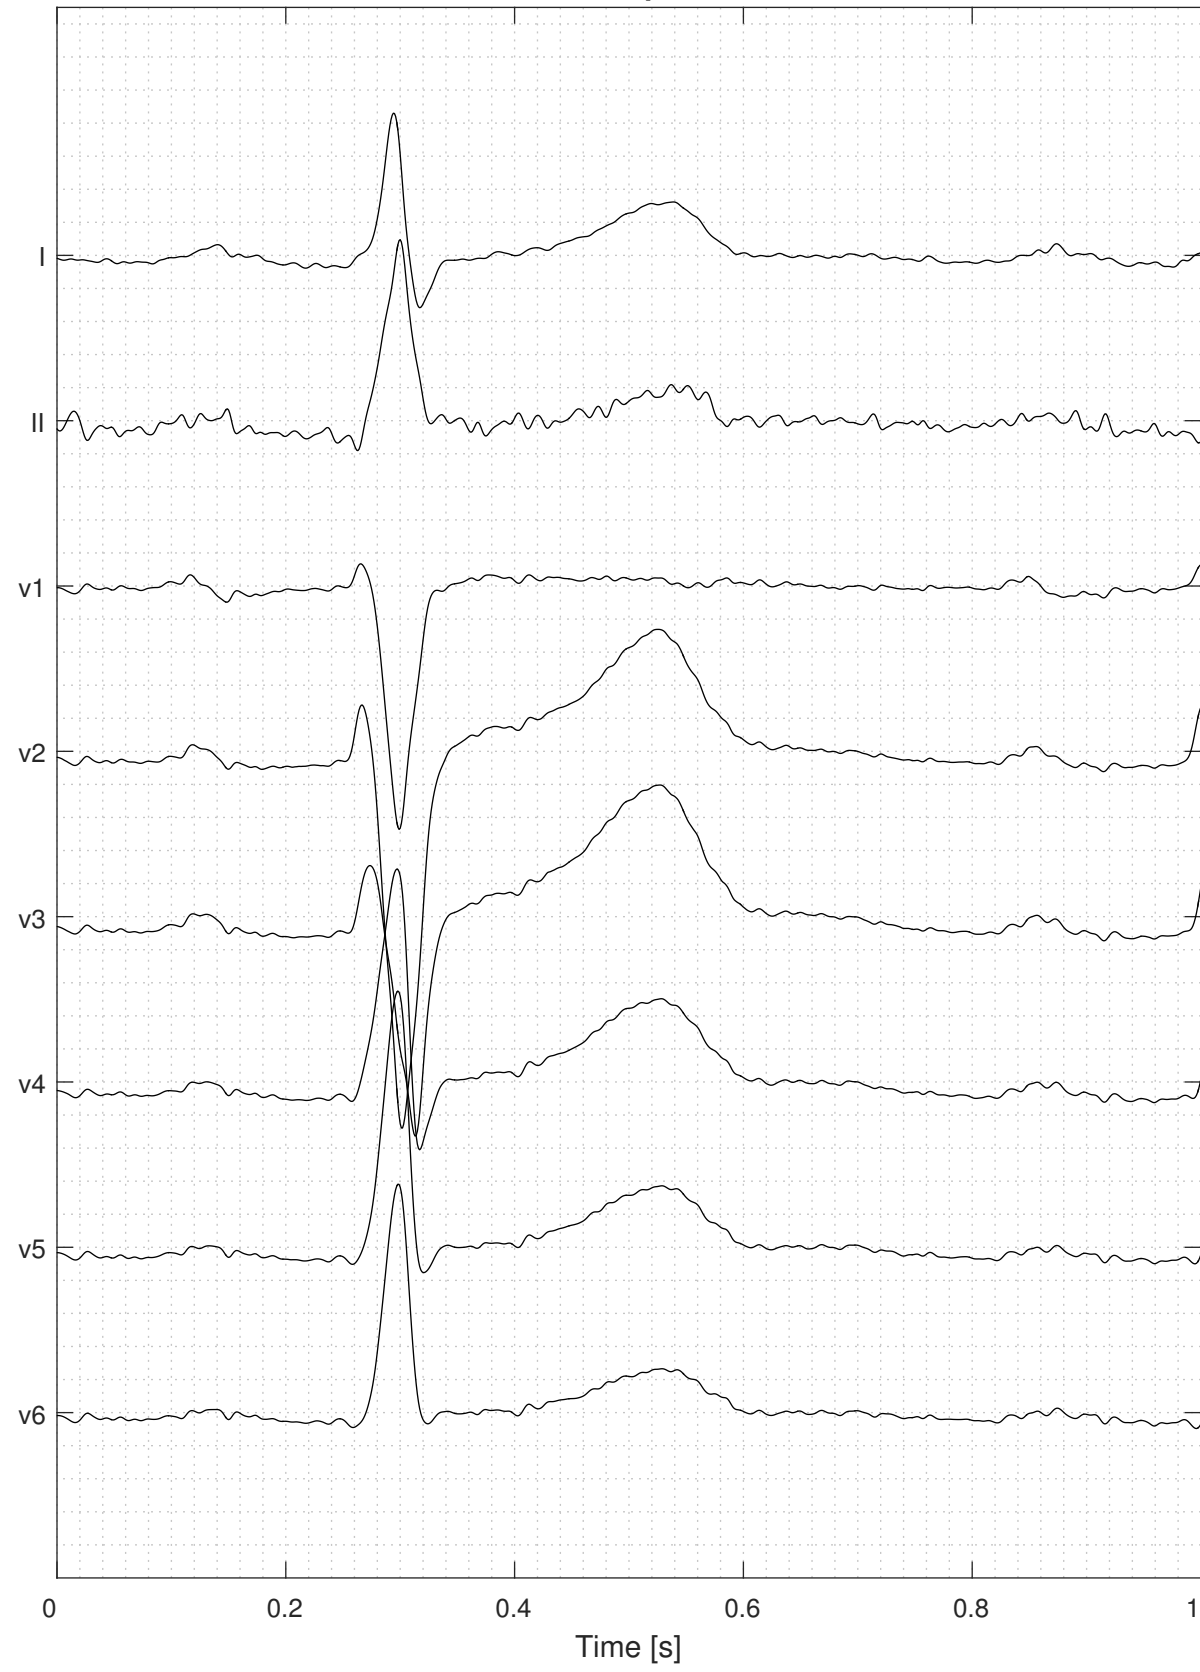

High RR, Complex #: 85

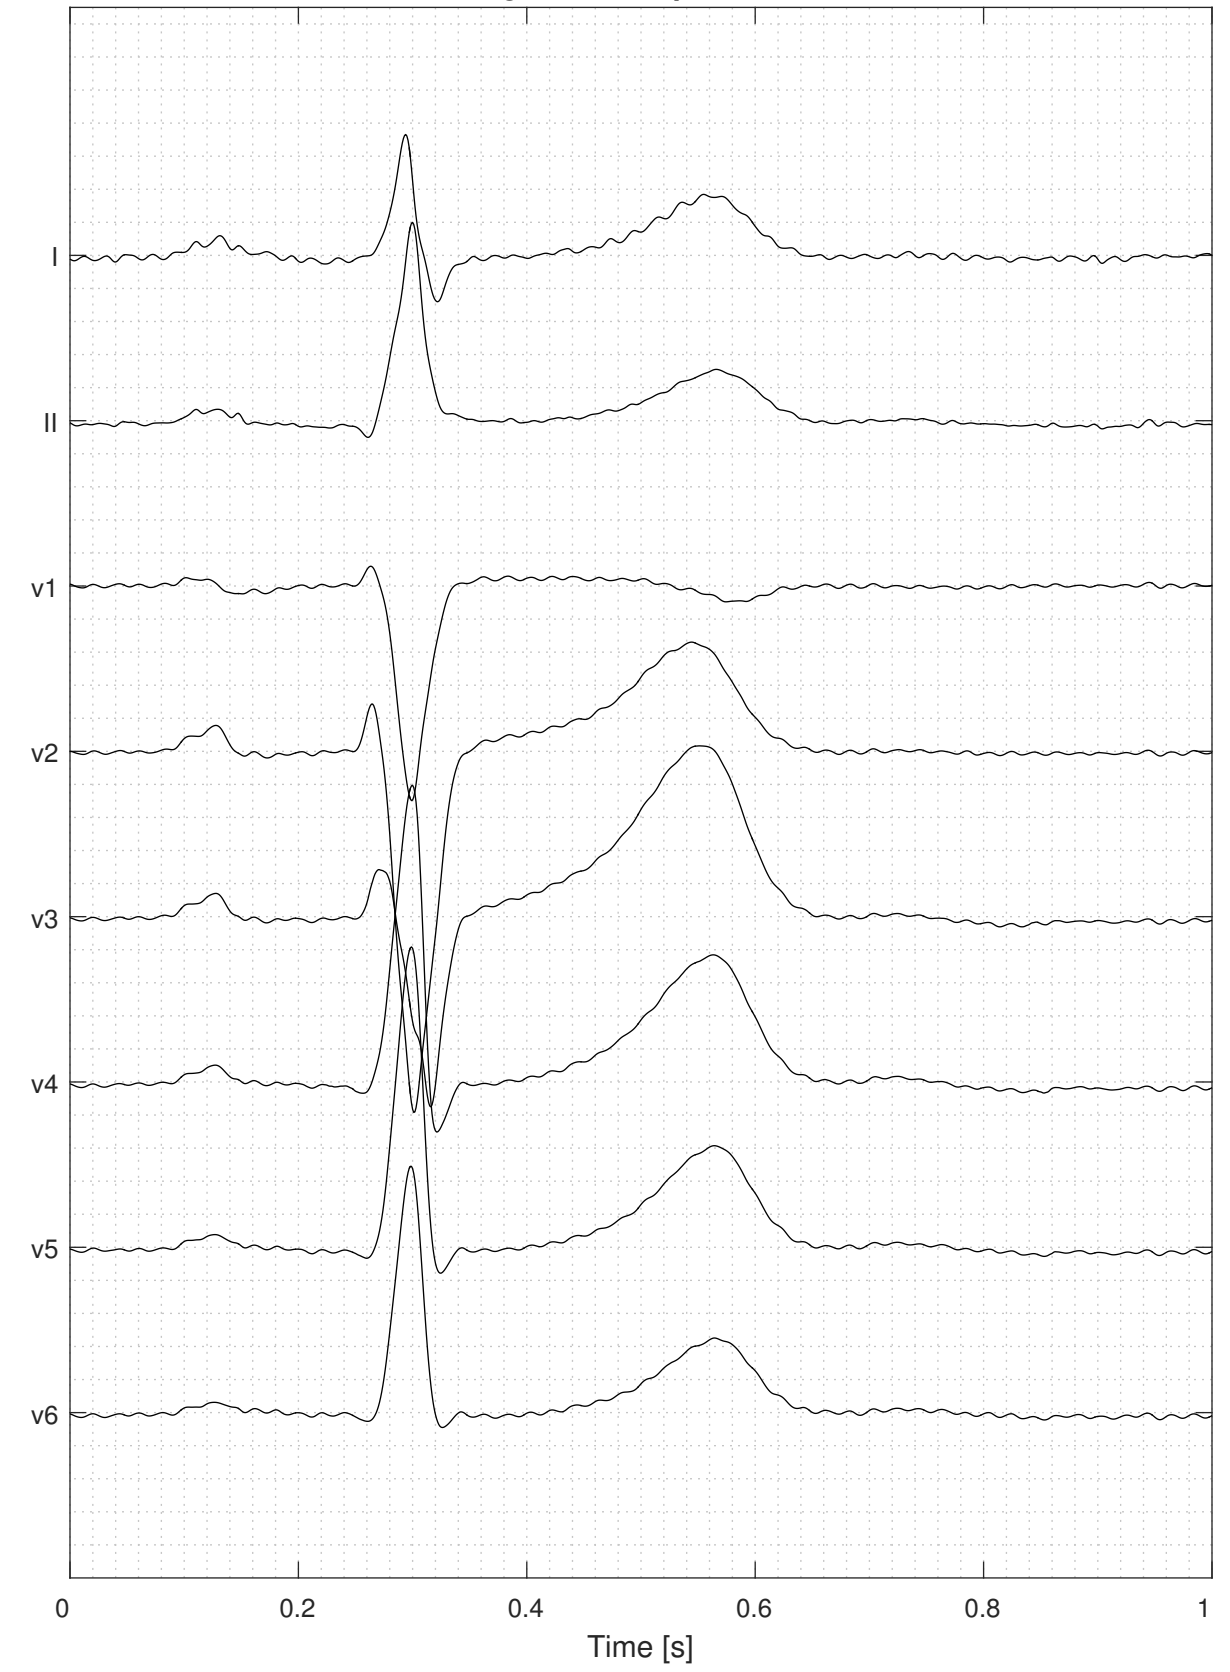

Patient 101

Low RR, Complex #: 215

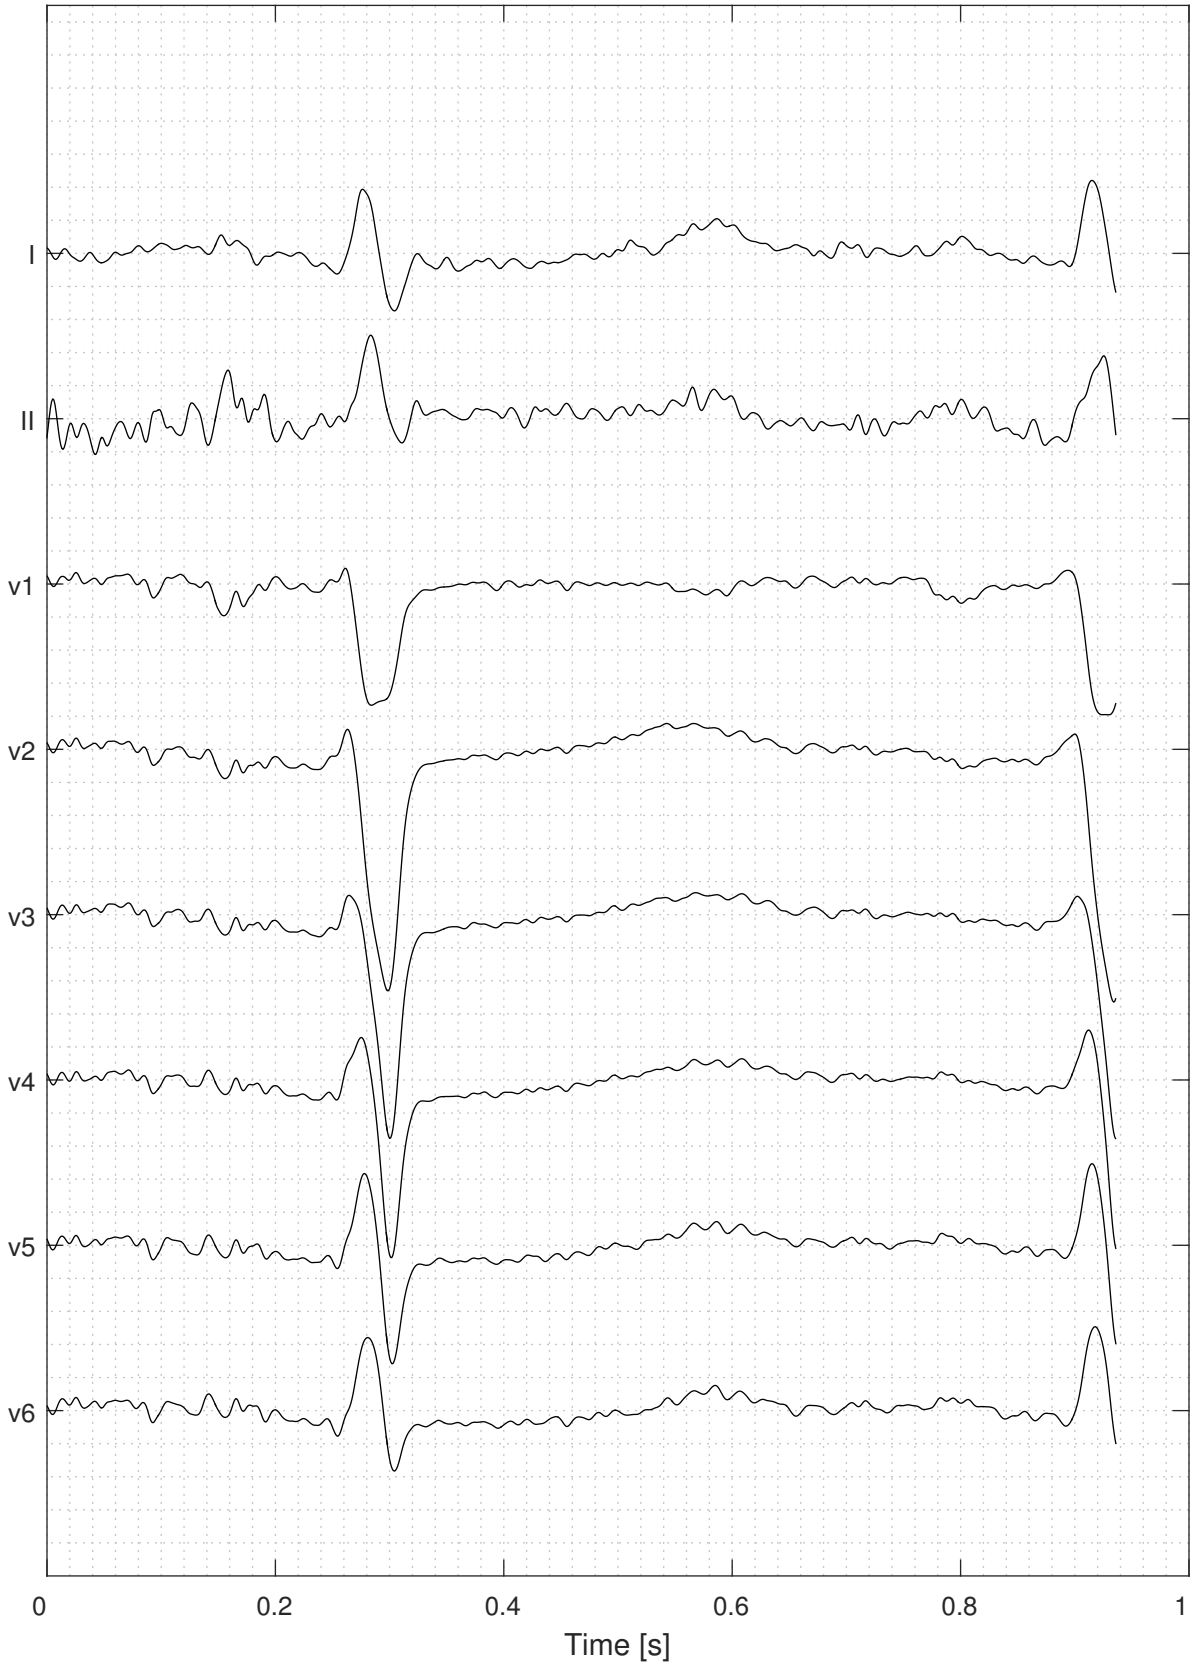

Mid RR, Complex #: 331

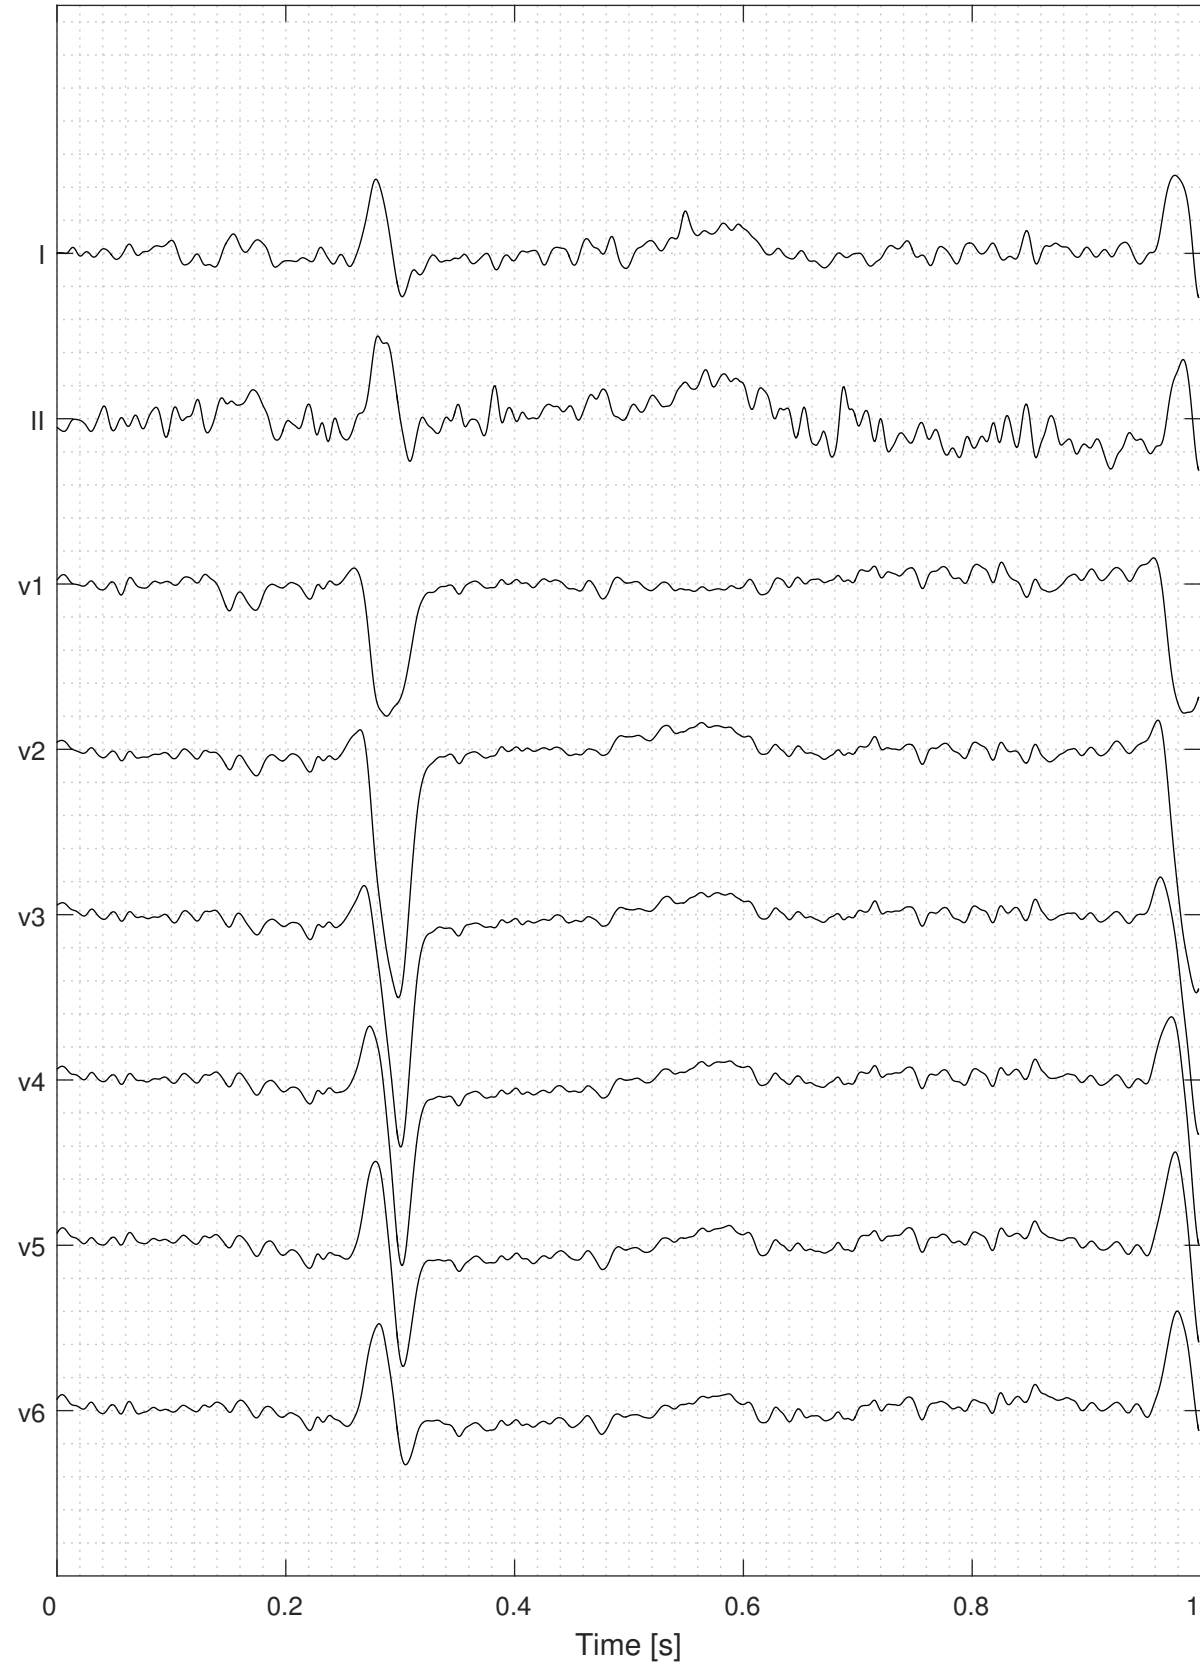

High RR, Complex #: 153

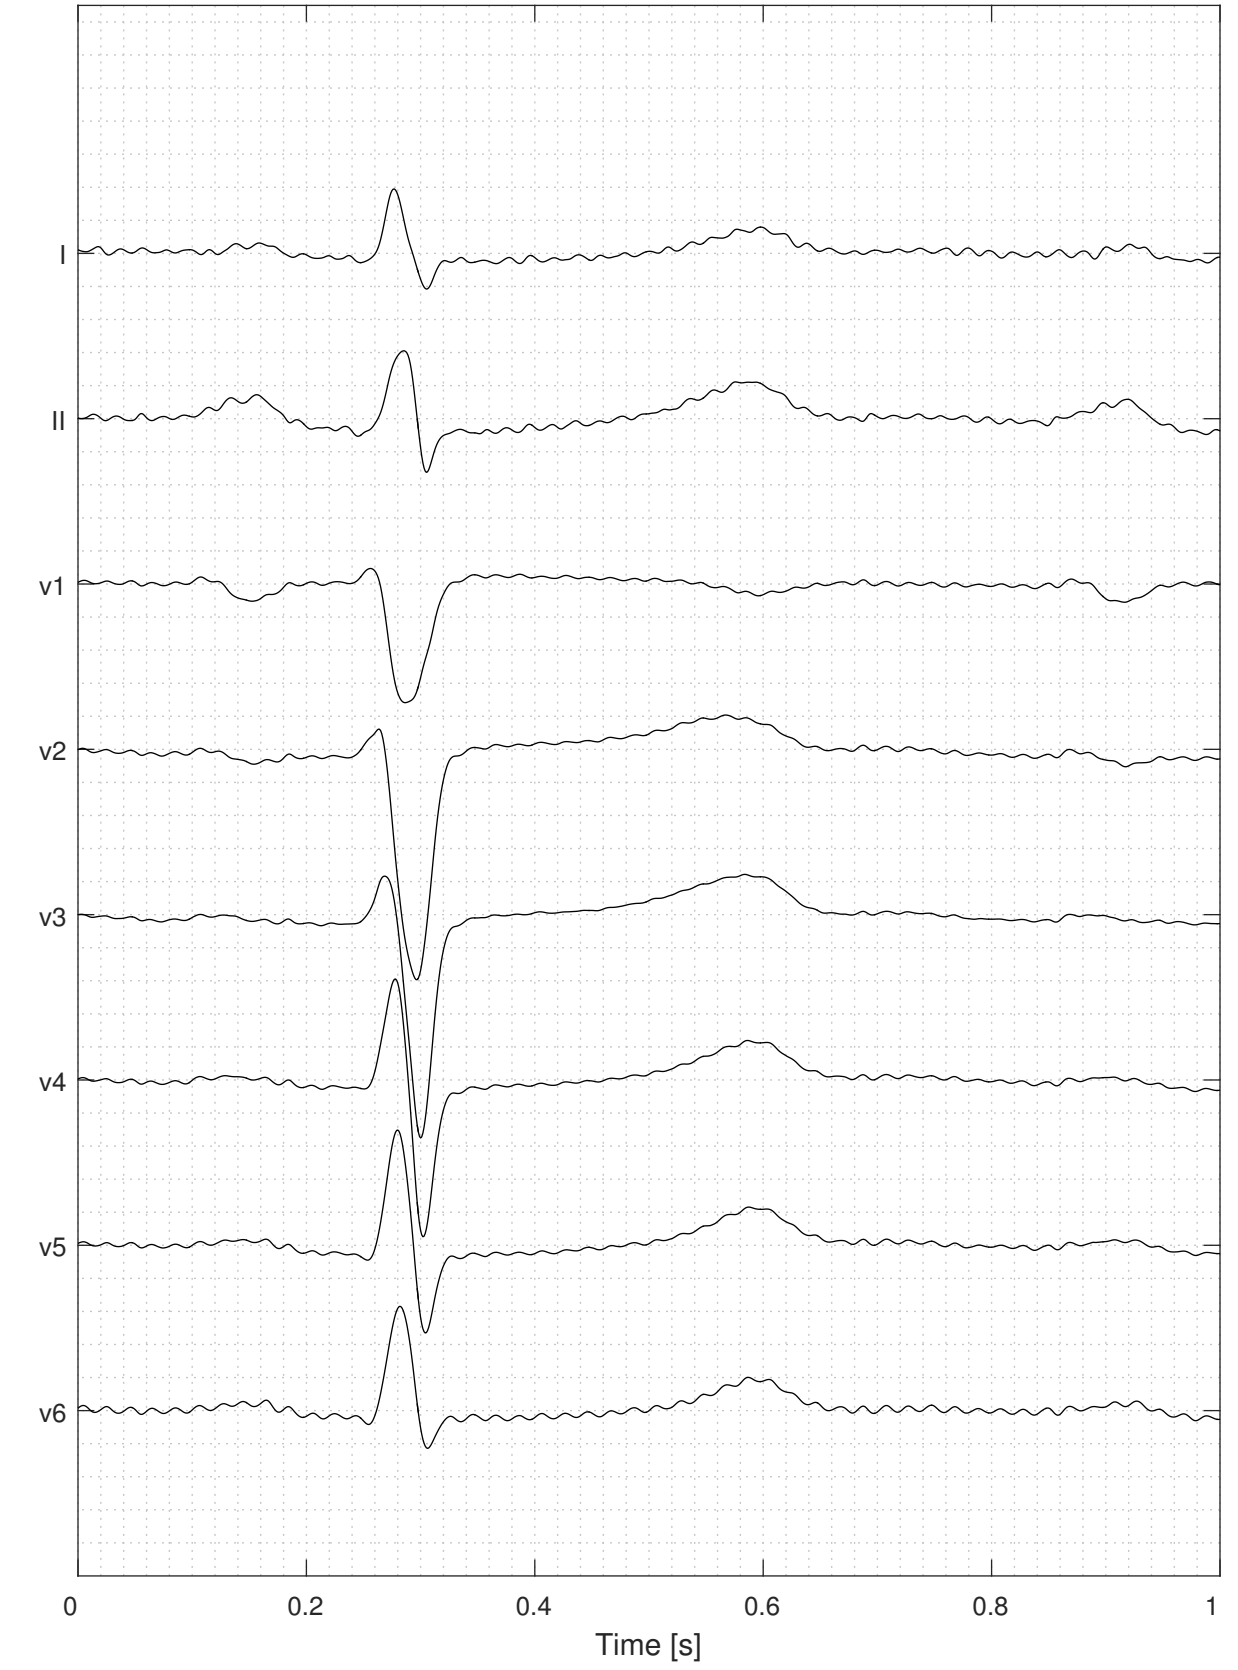

Patient 102

Low RR, Complex #: 241

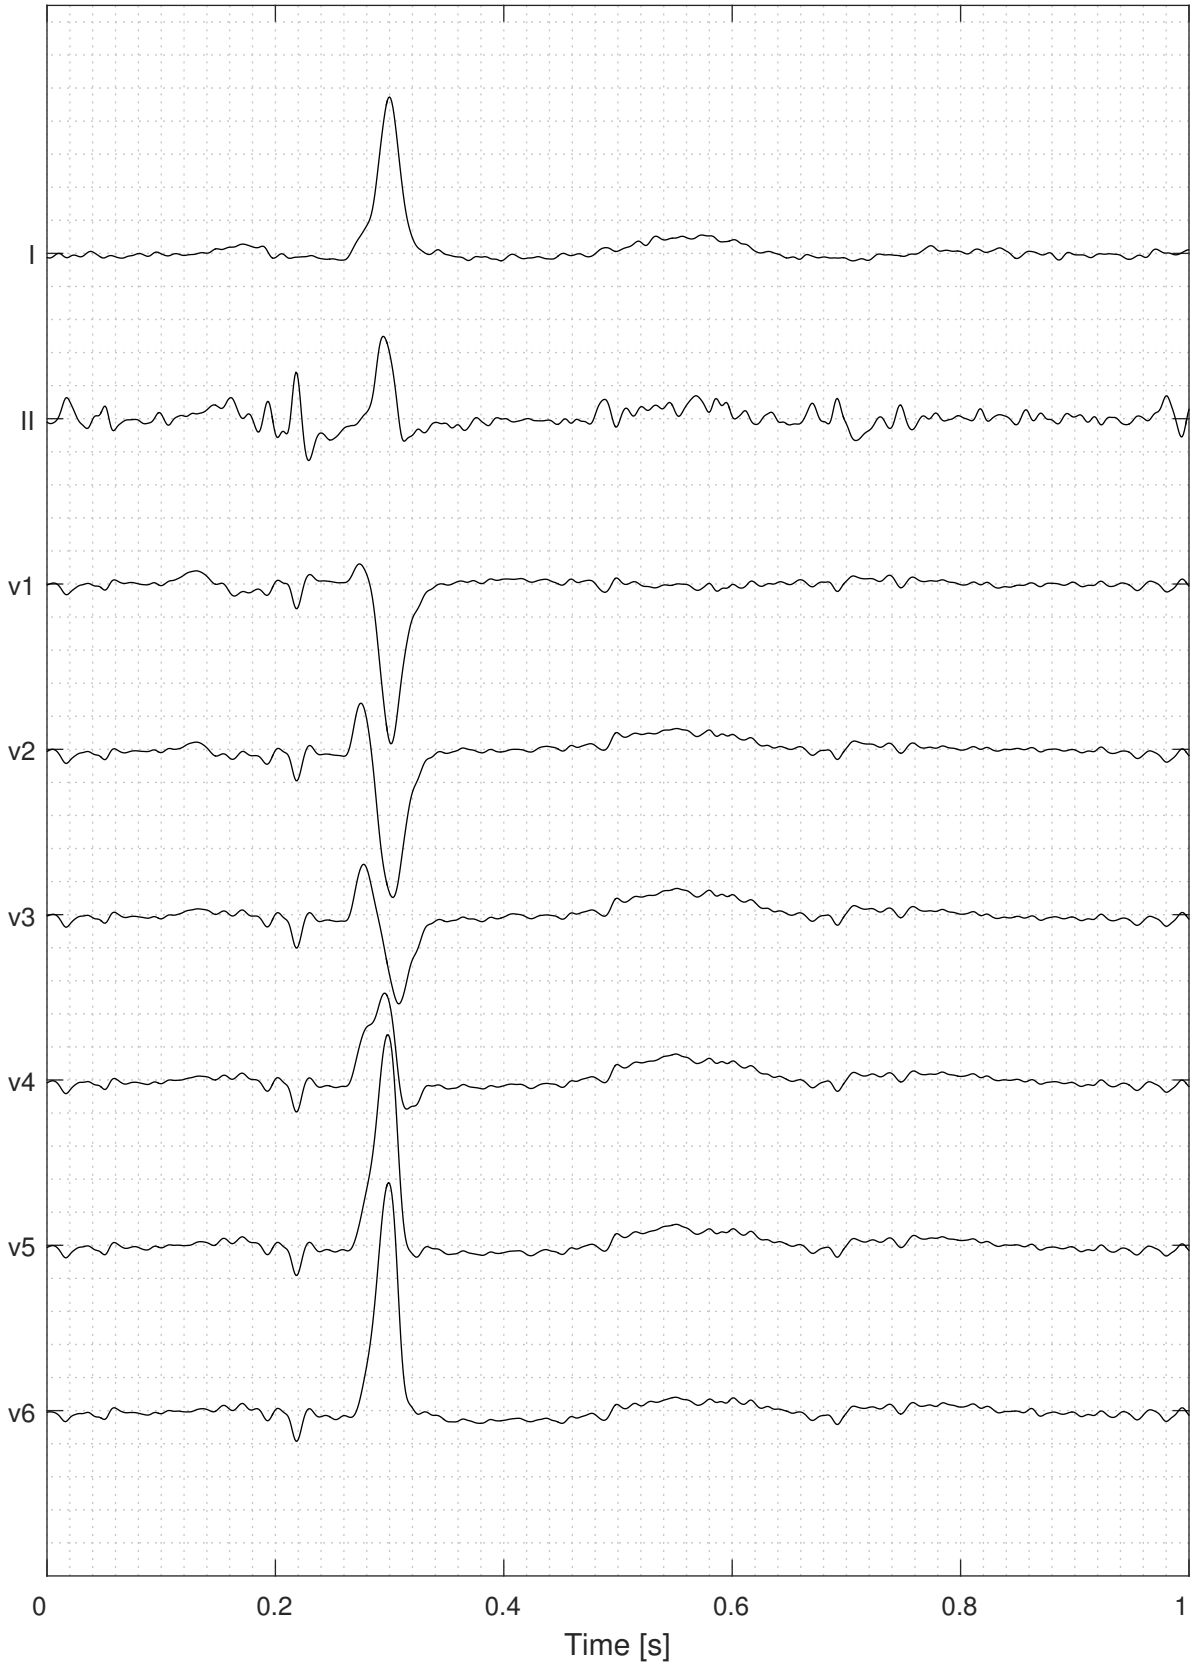

Mid RR, Complex #: 198

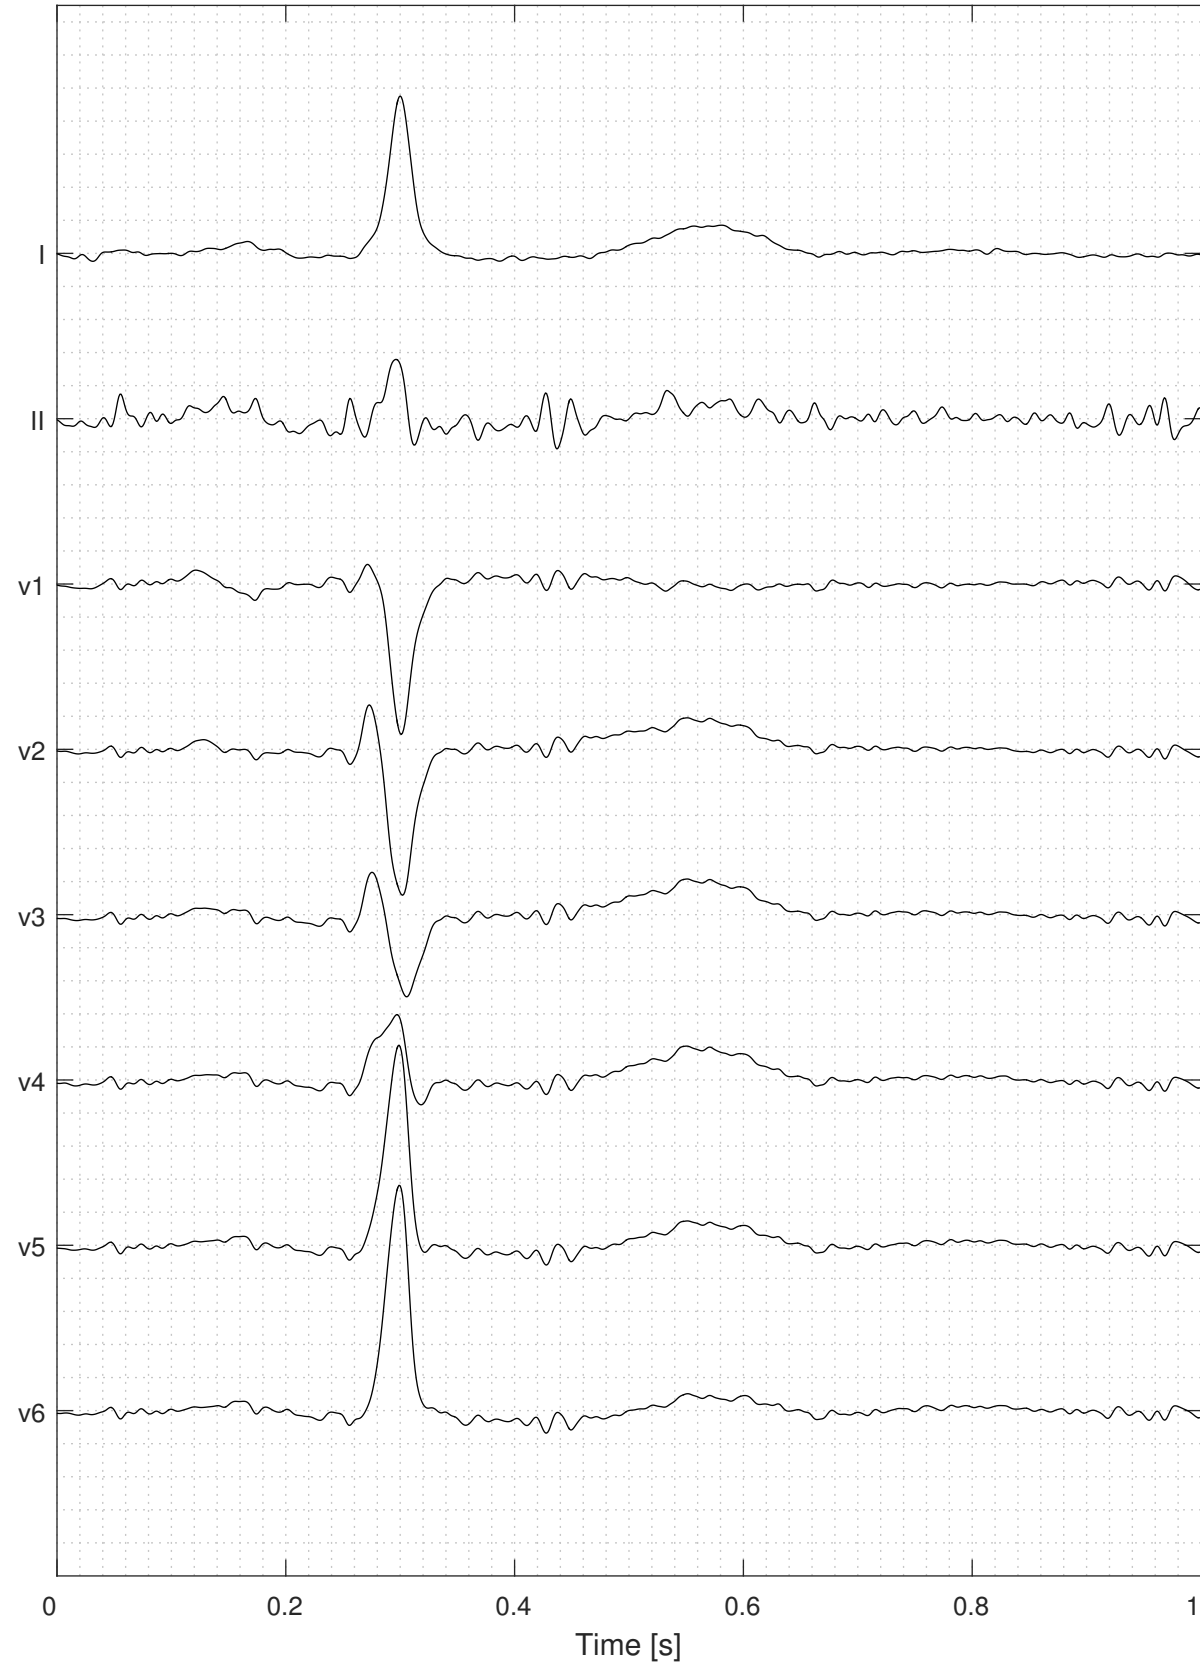

High RR, Complex #: 4

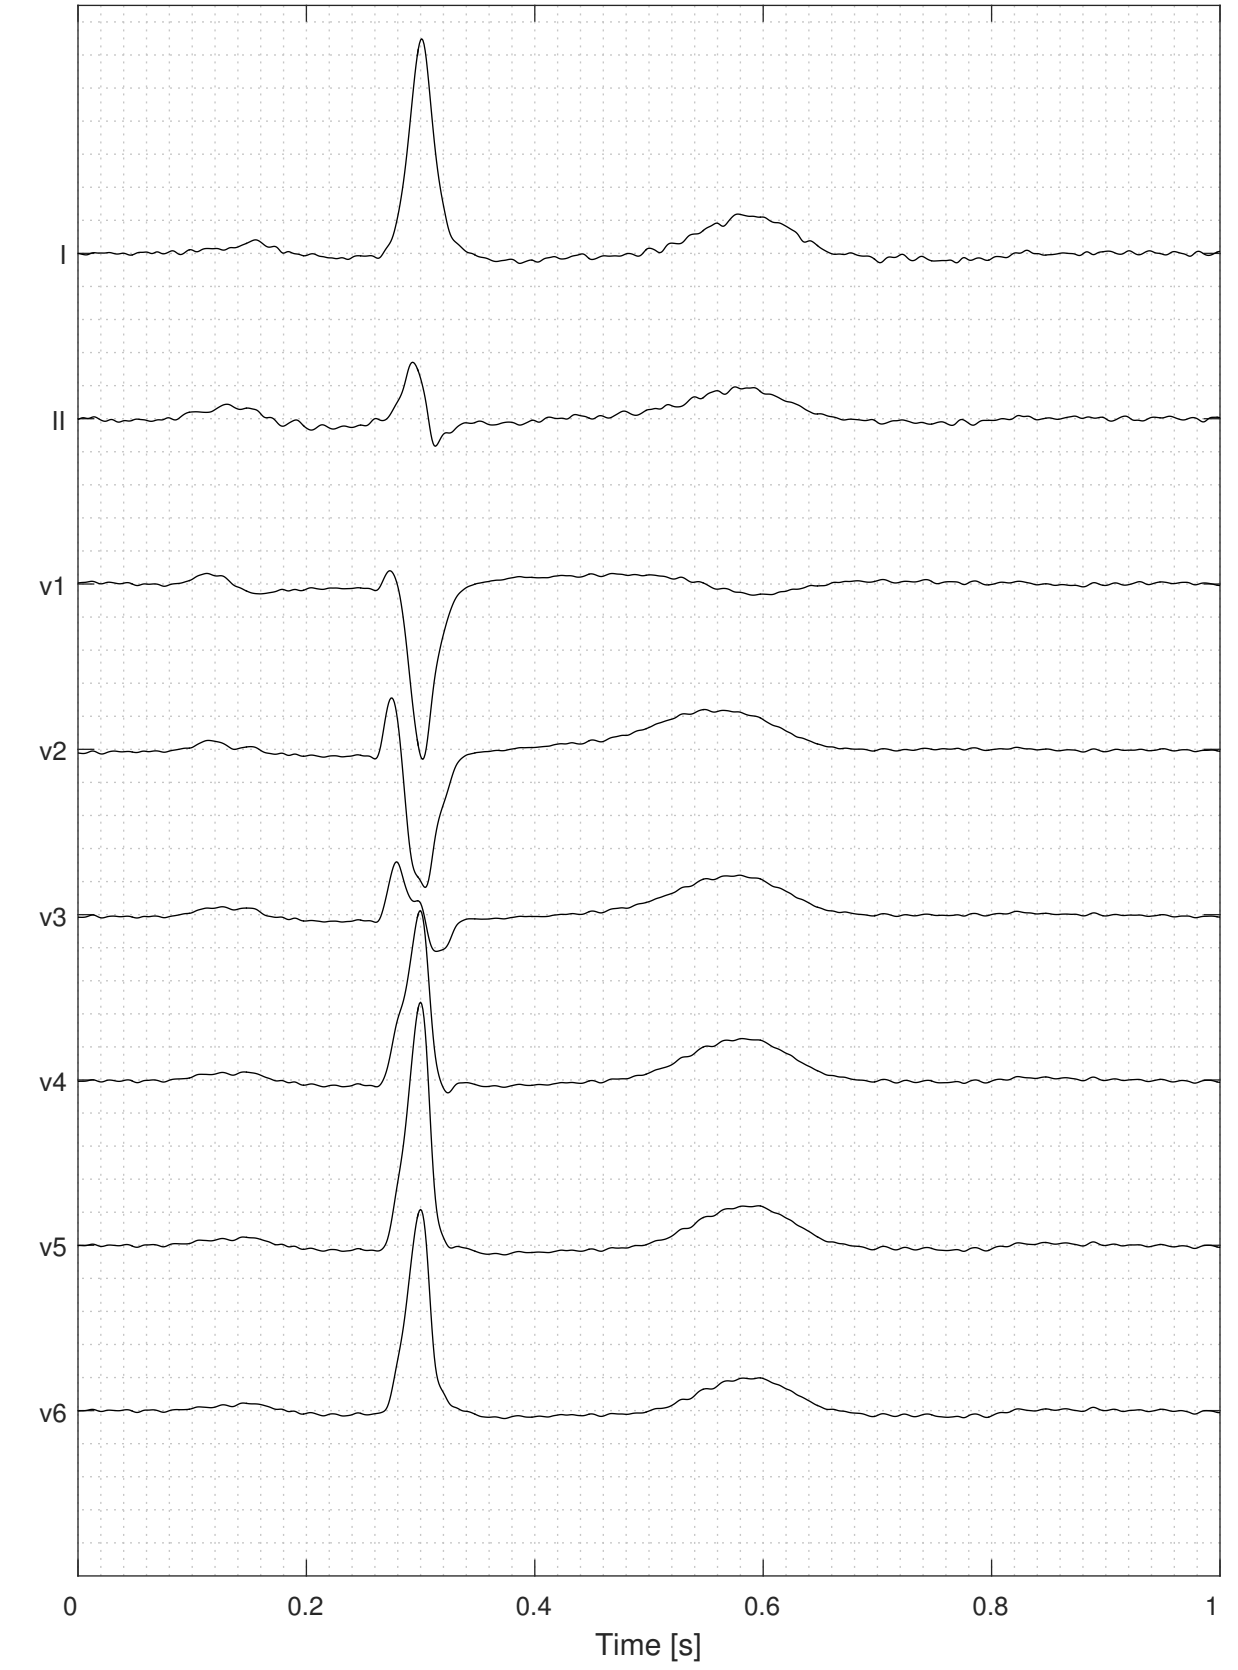

Patient 103

Low RR, Complex #: 274

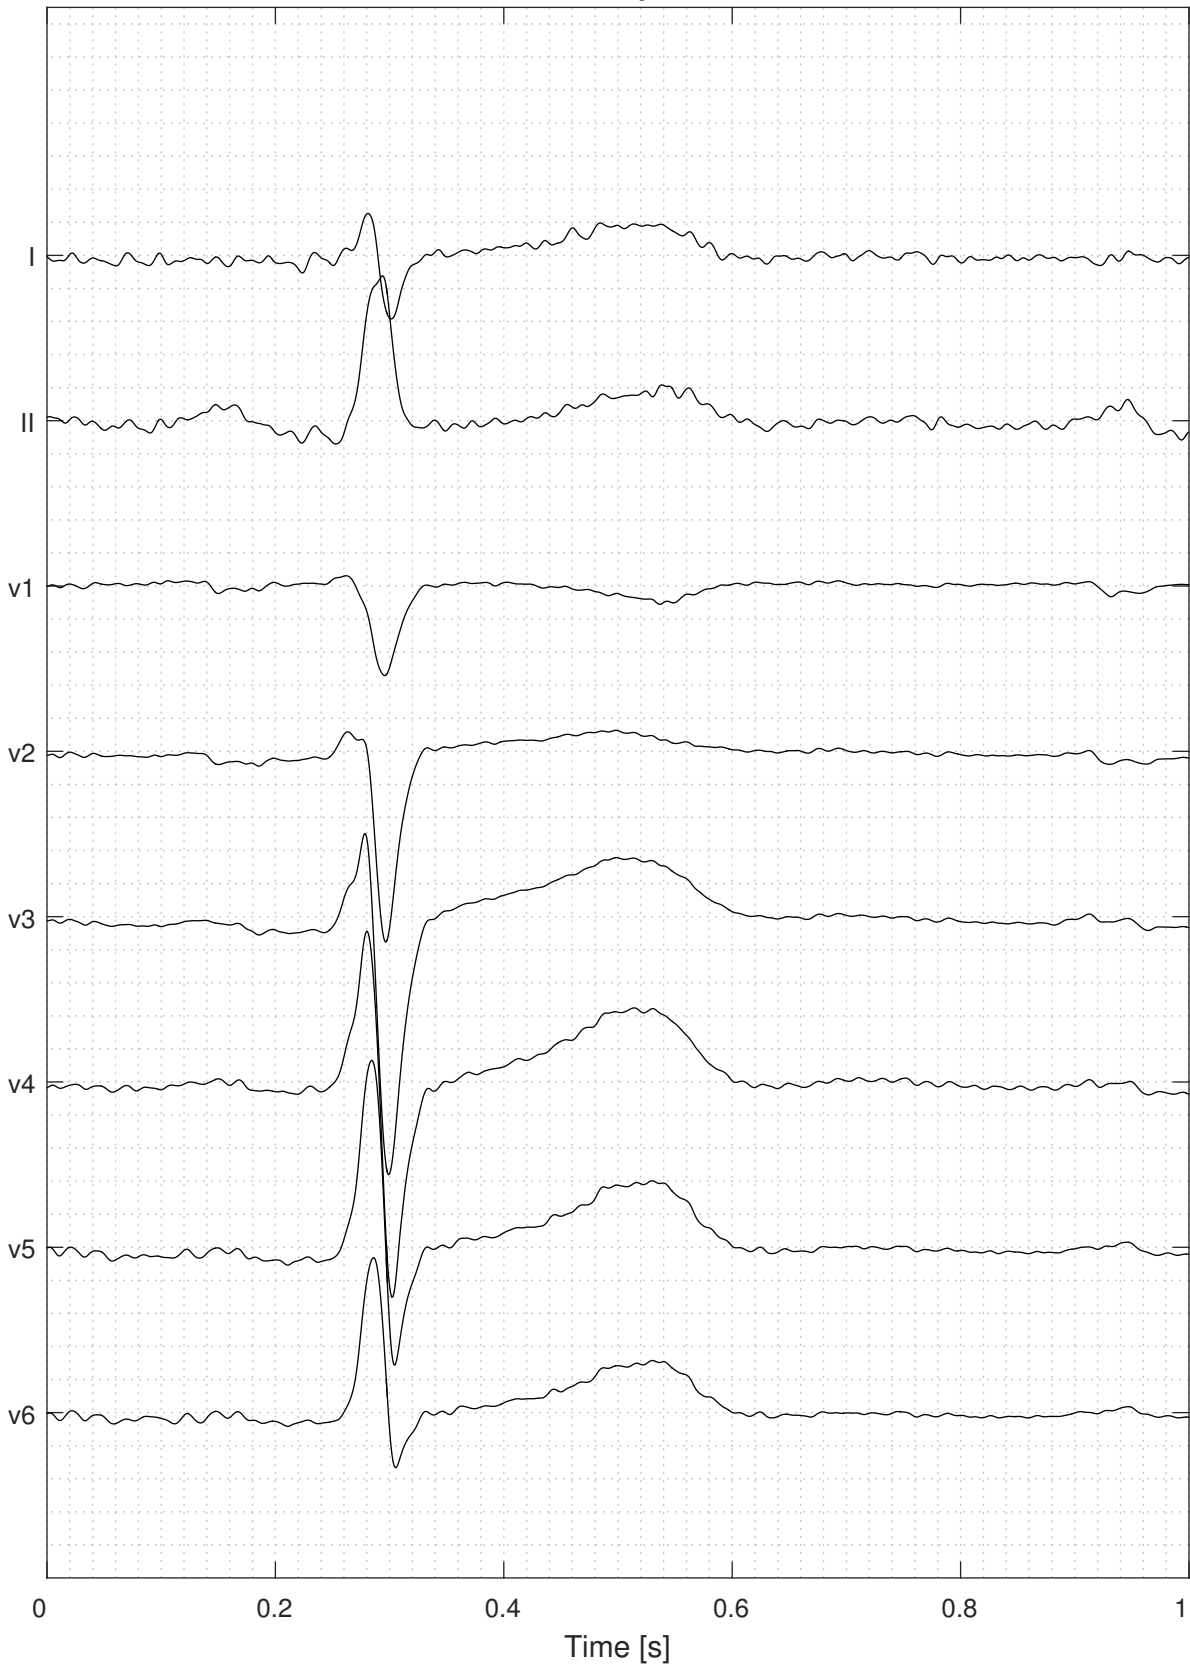

Mid RR, Complex #: 196

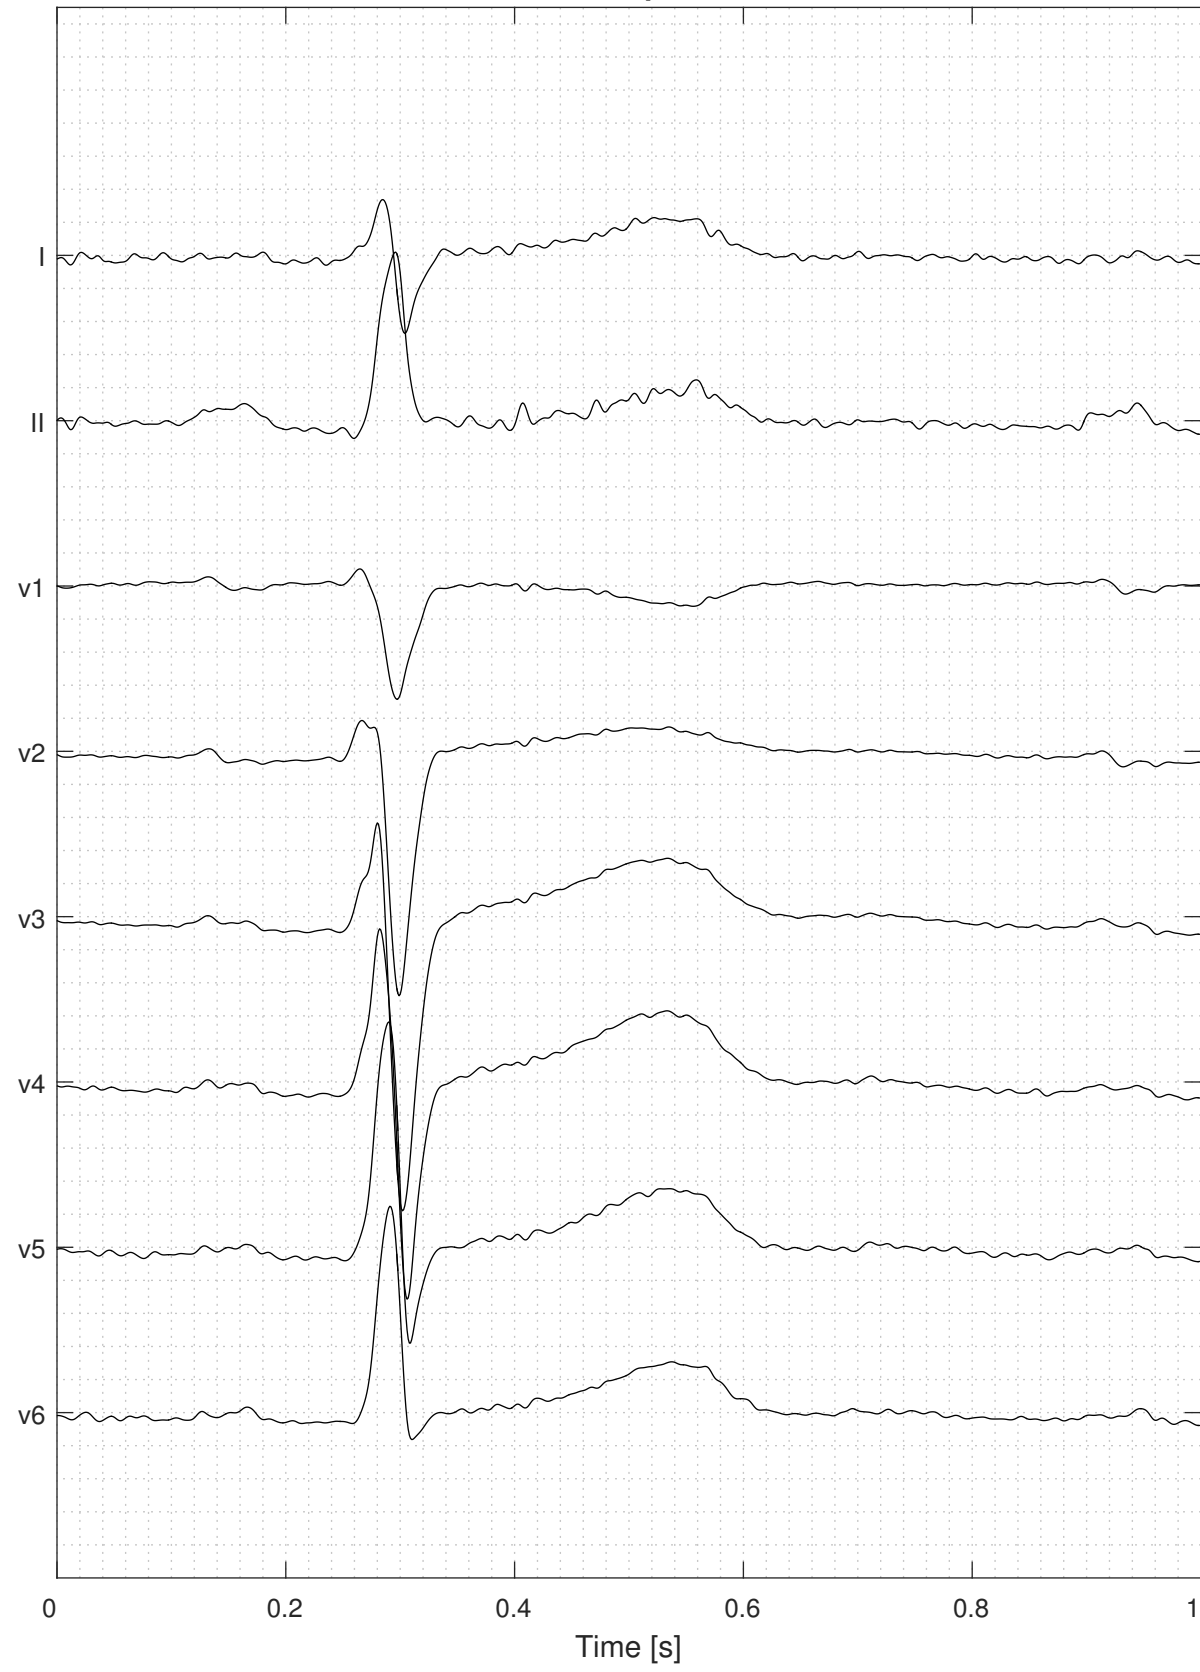

High RR, Complex #: 22

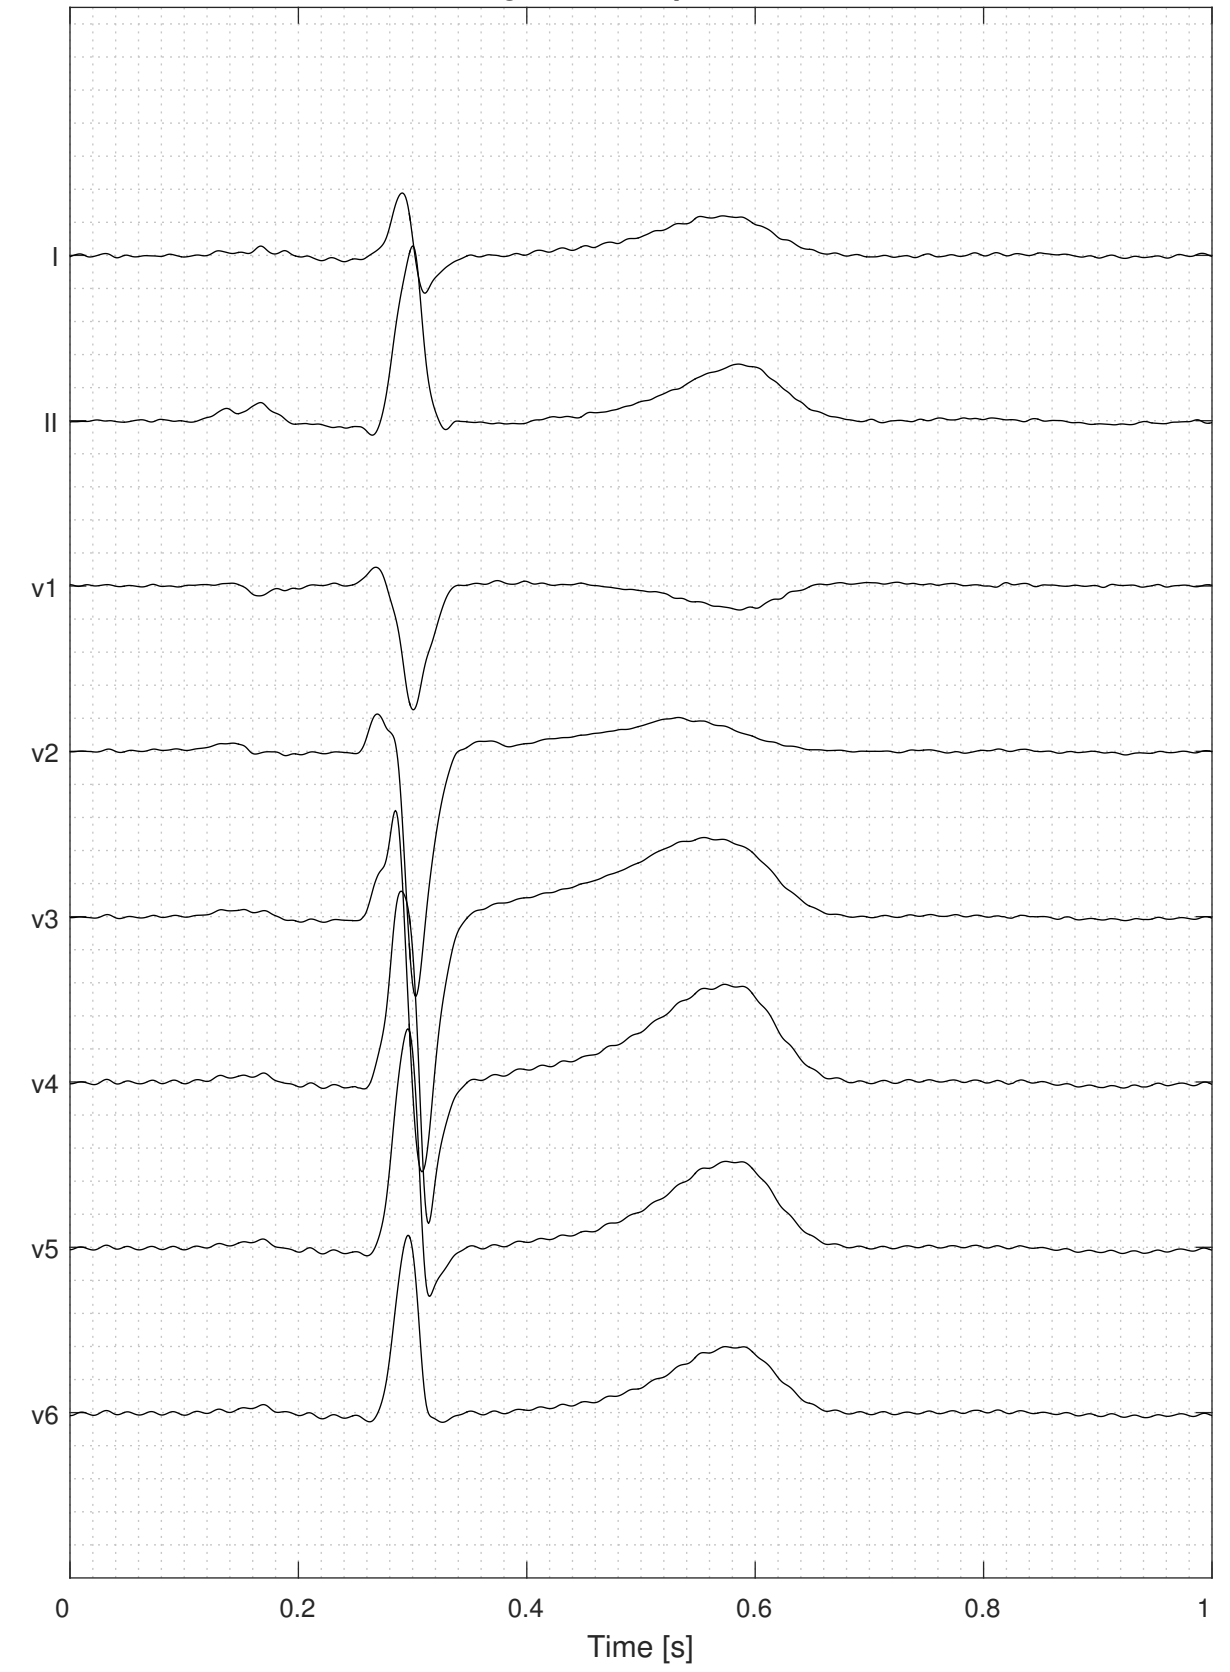

Patient 104

Low RR, Complex #: 267

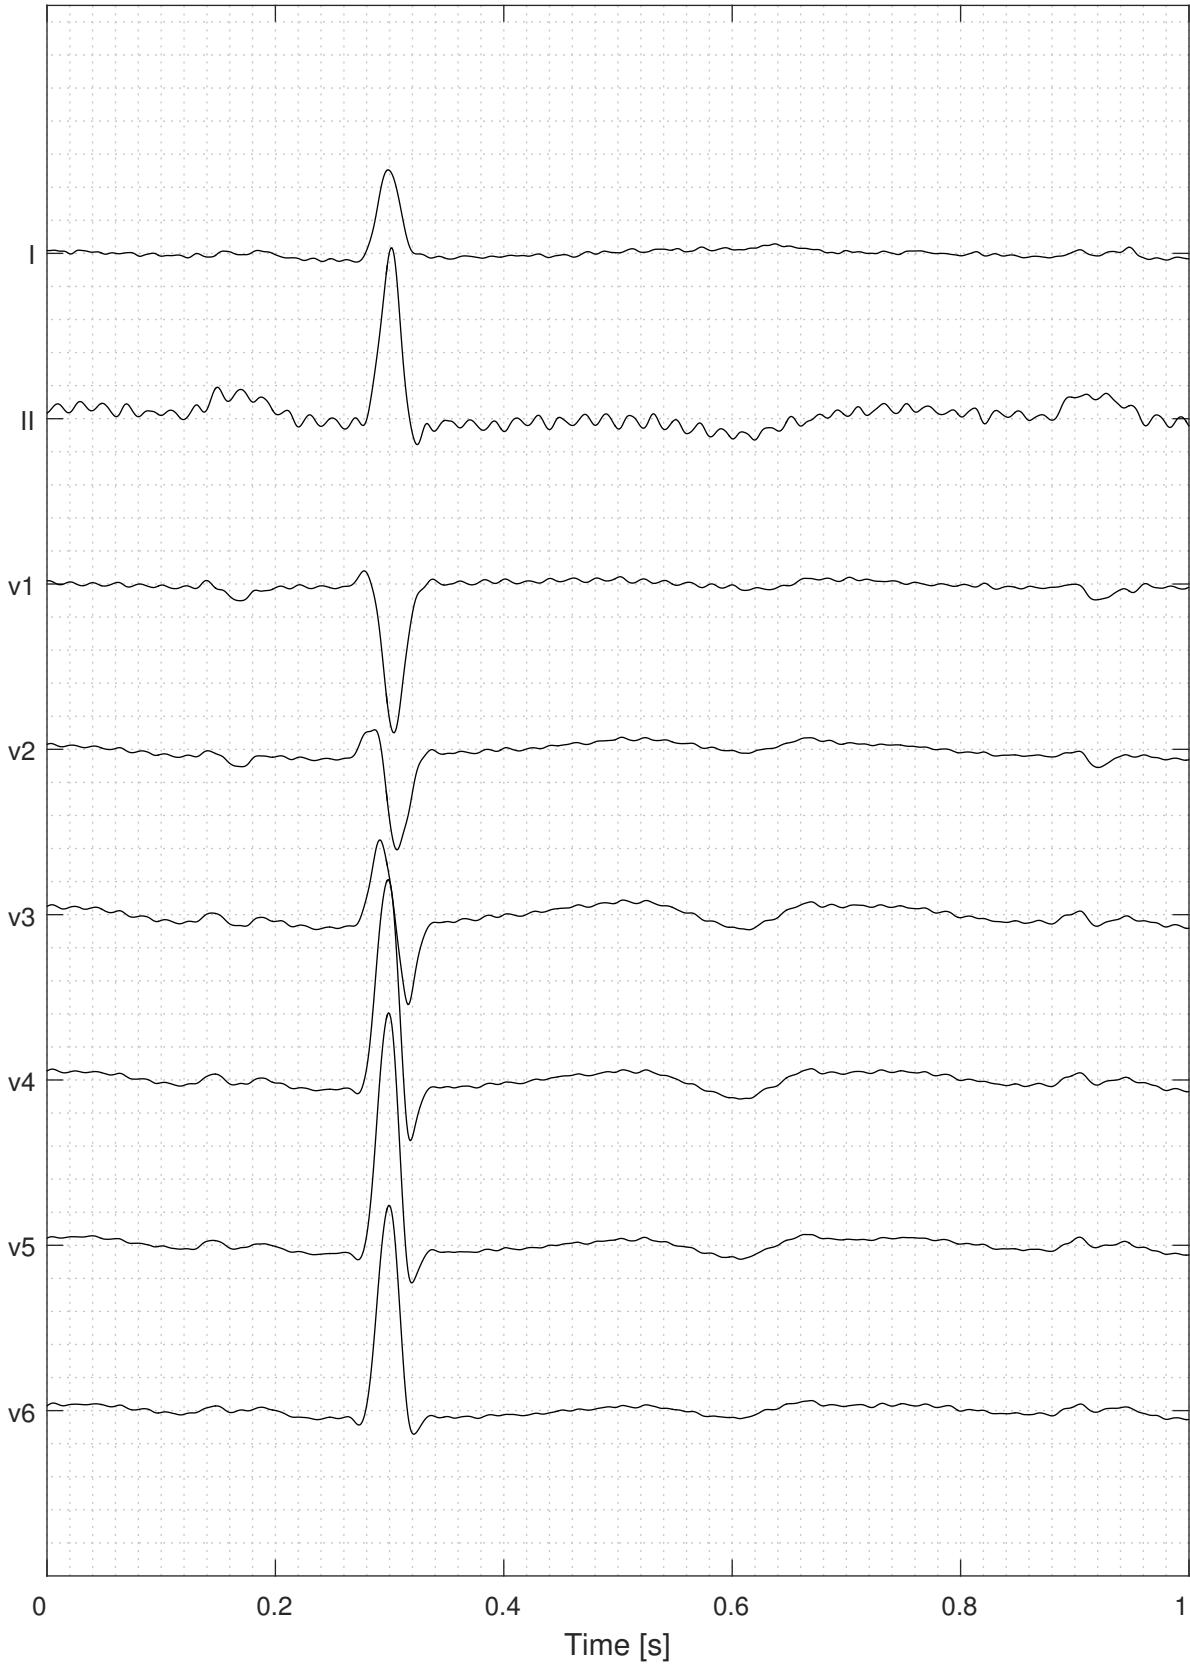

Mid RR, Complex #: 255

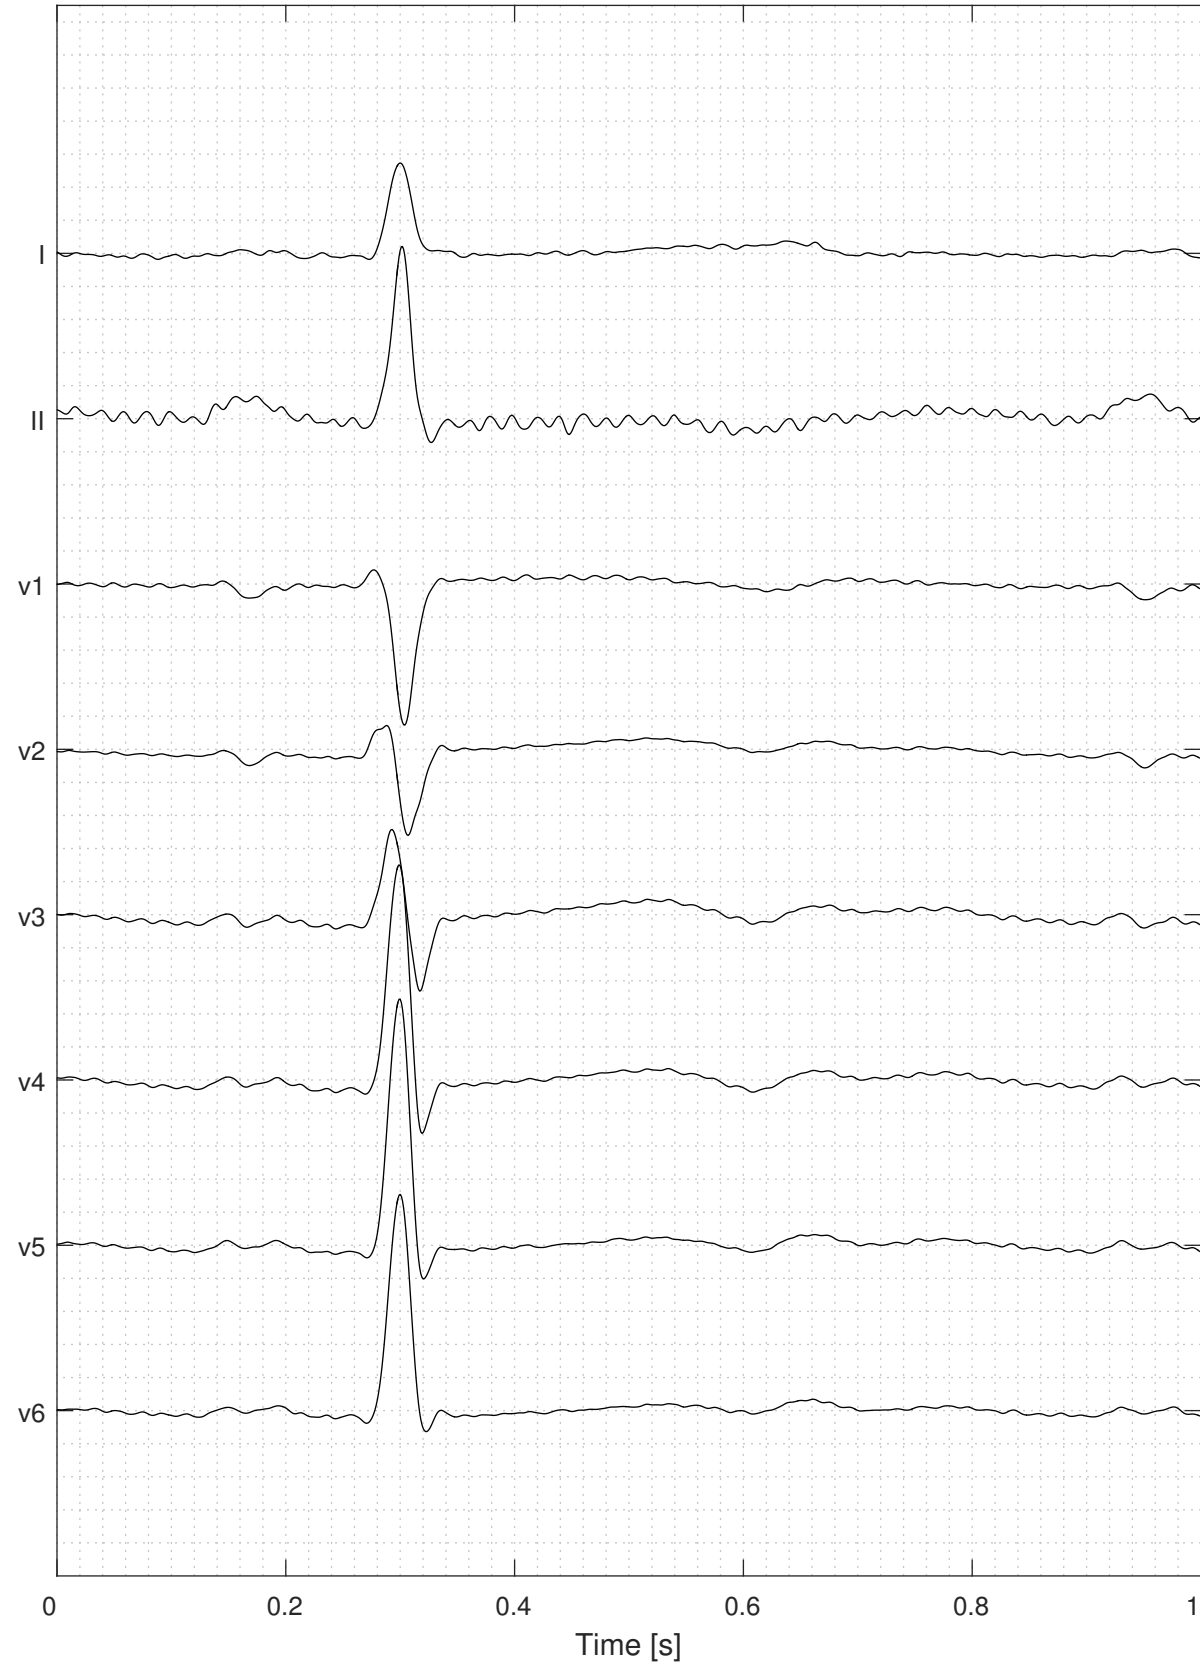

High RR, Complex #: 14

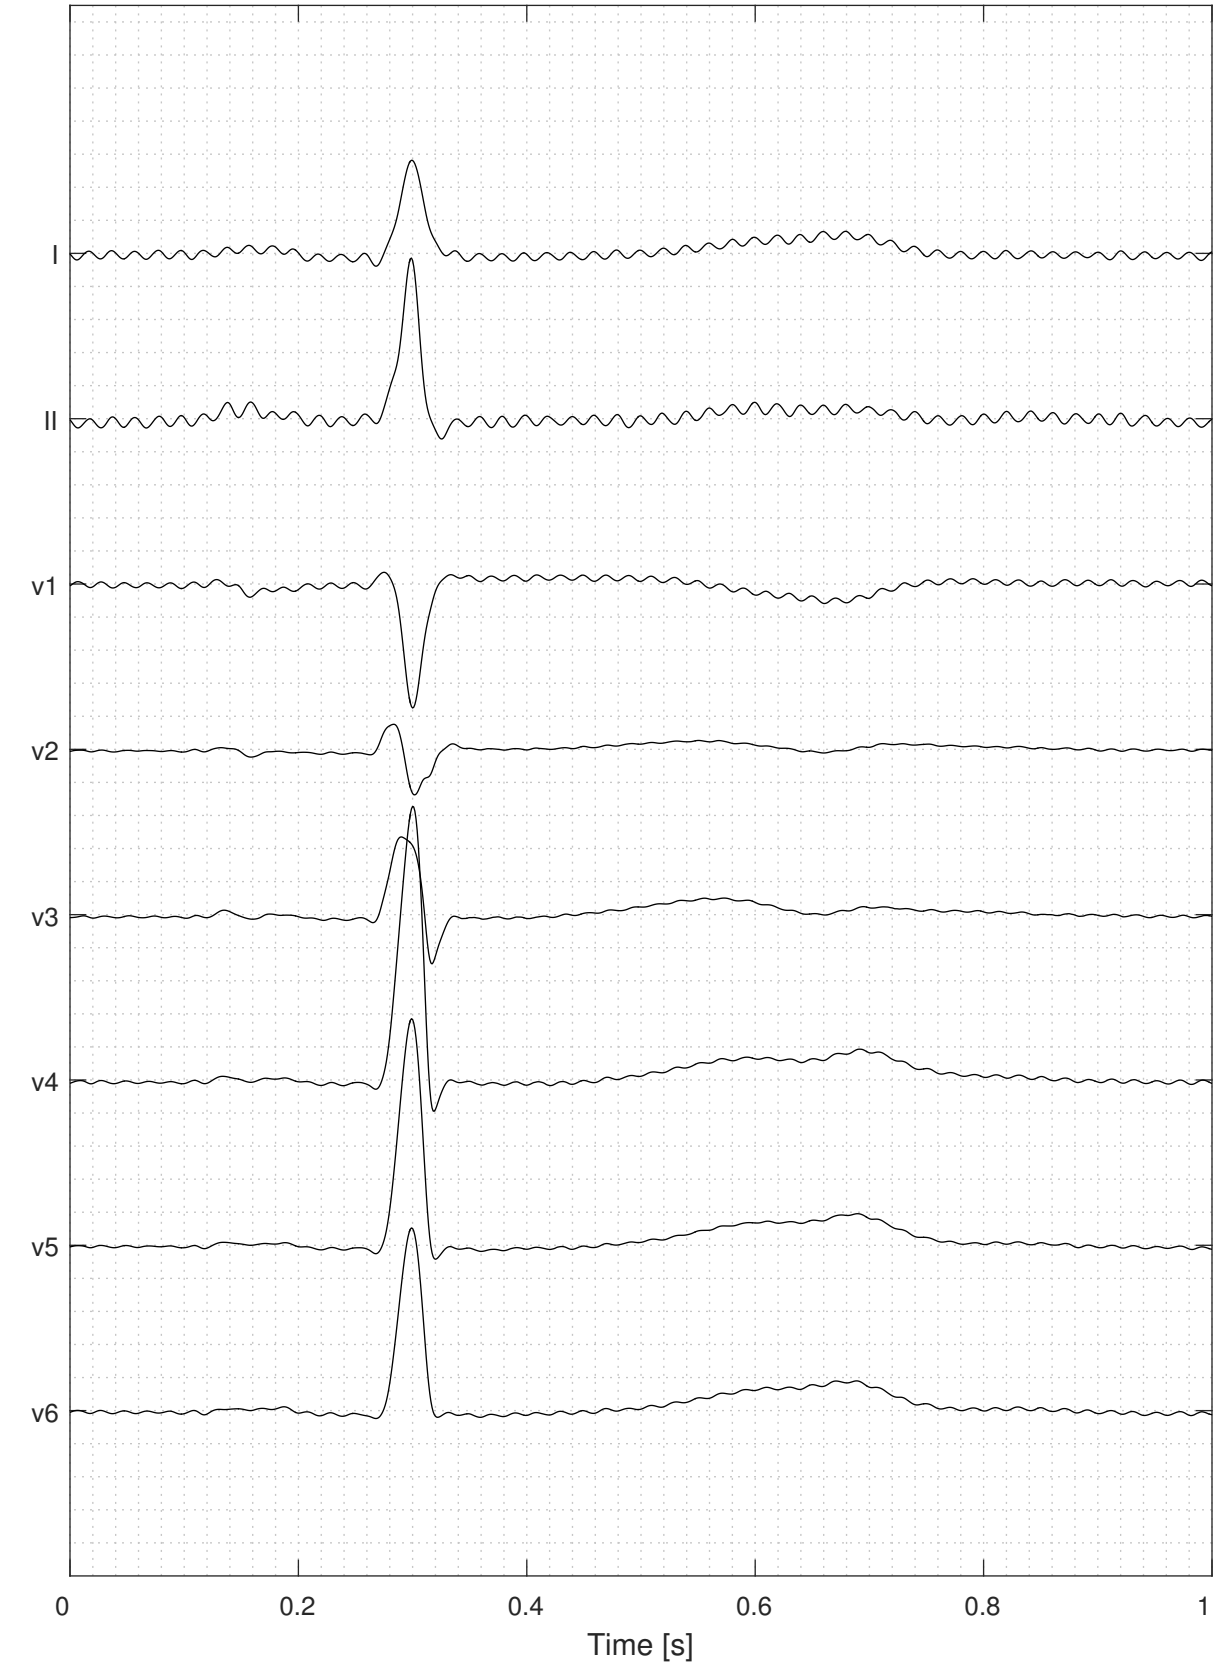



Patient 105

Low RR, Complex #: 62

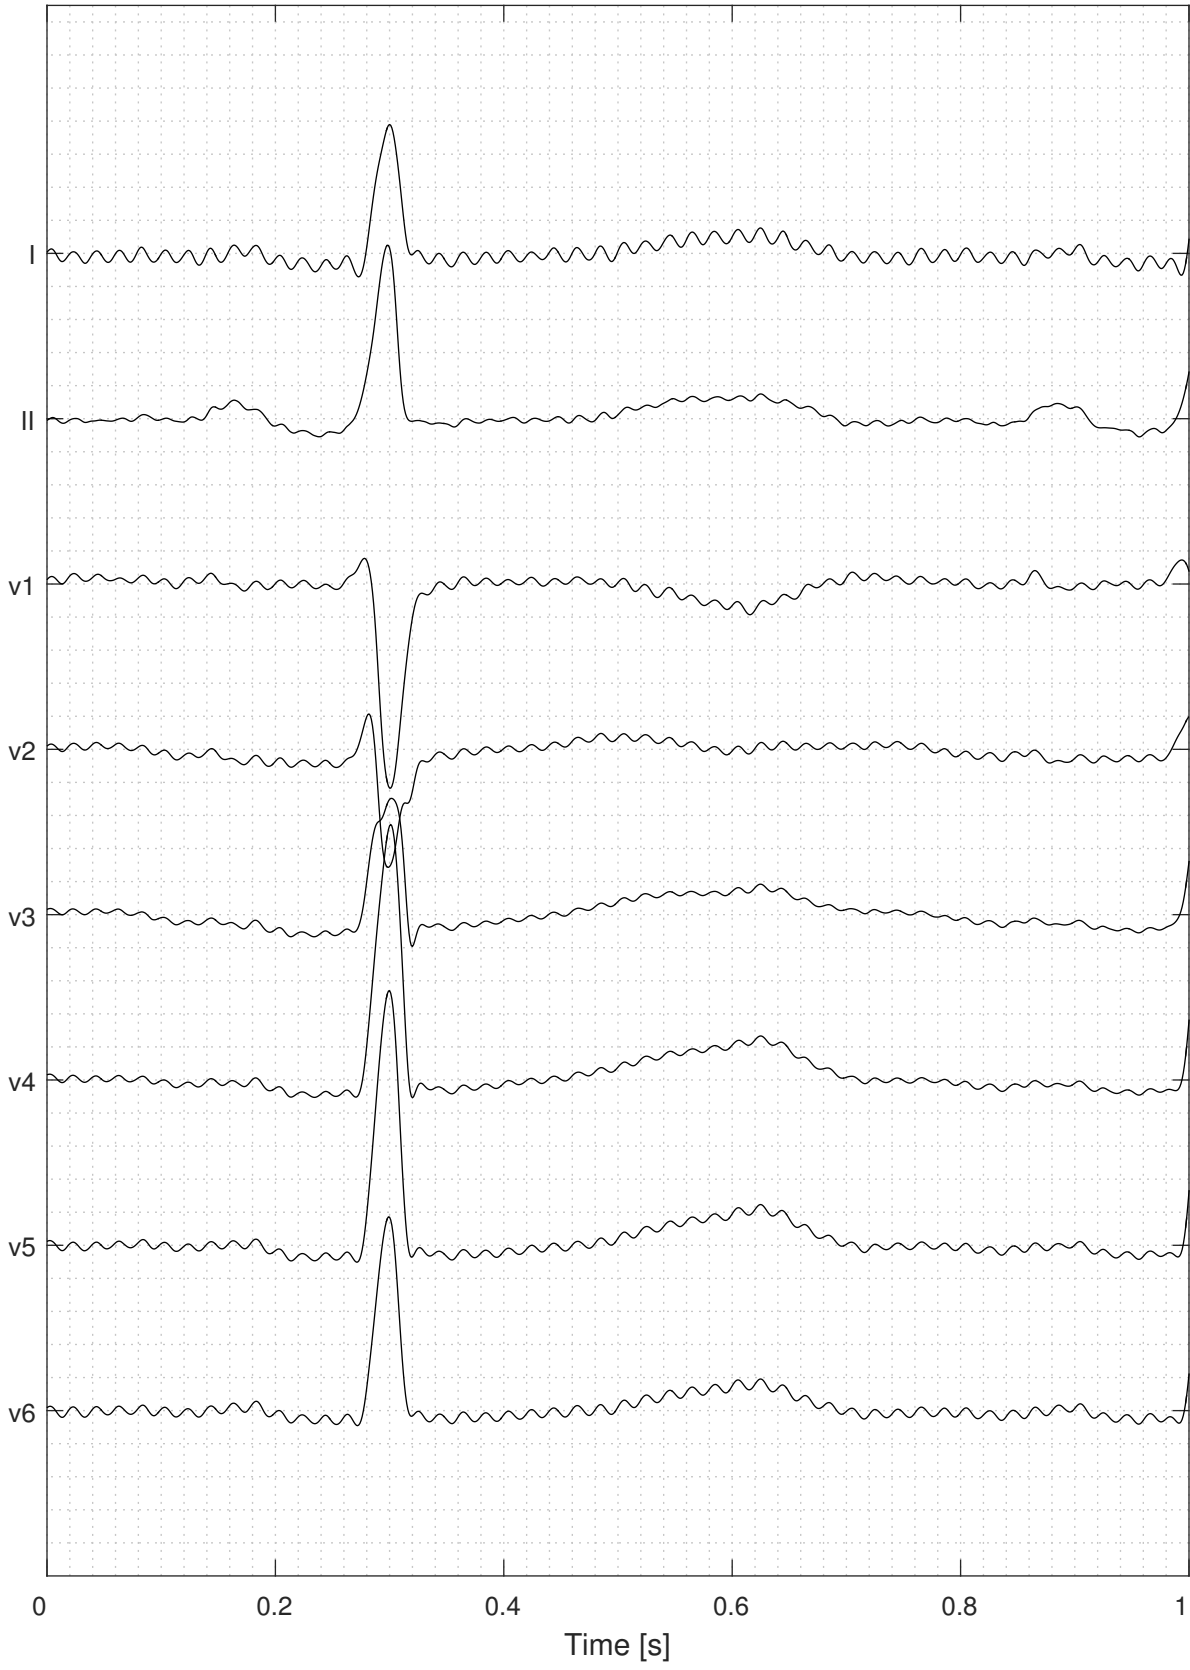

Mid RR, Complex #: 261

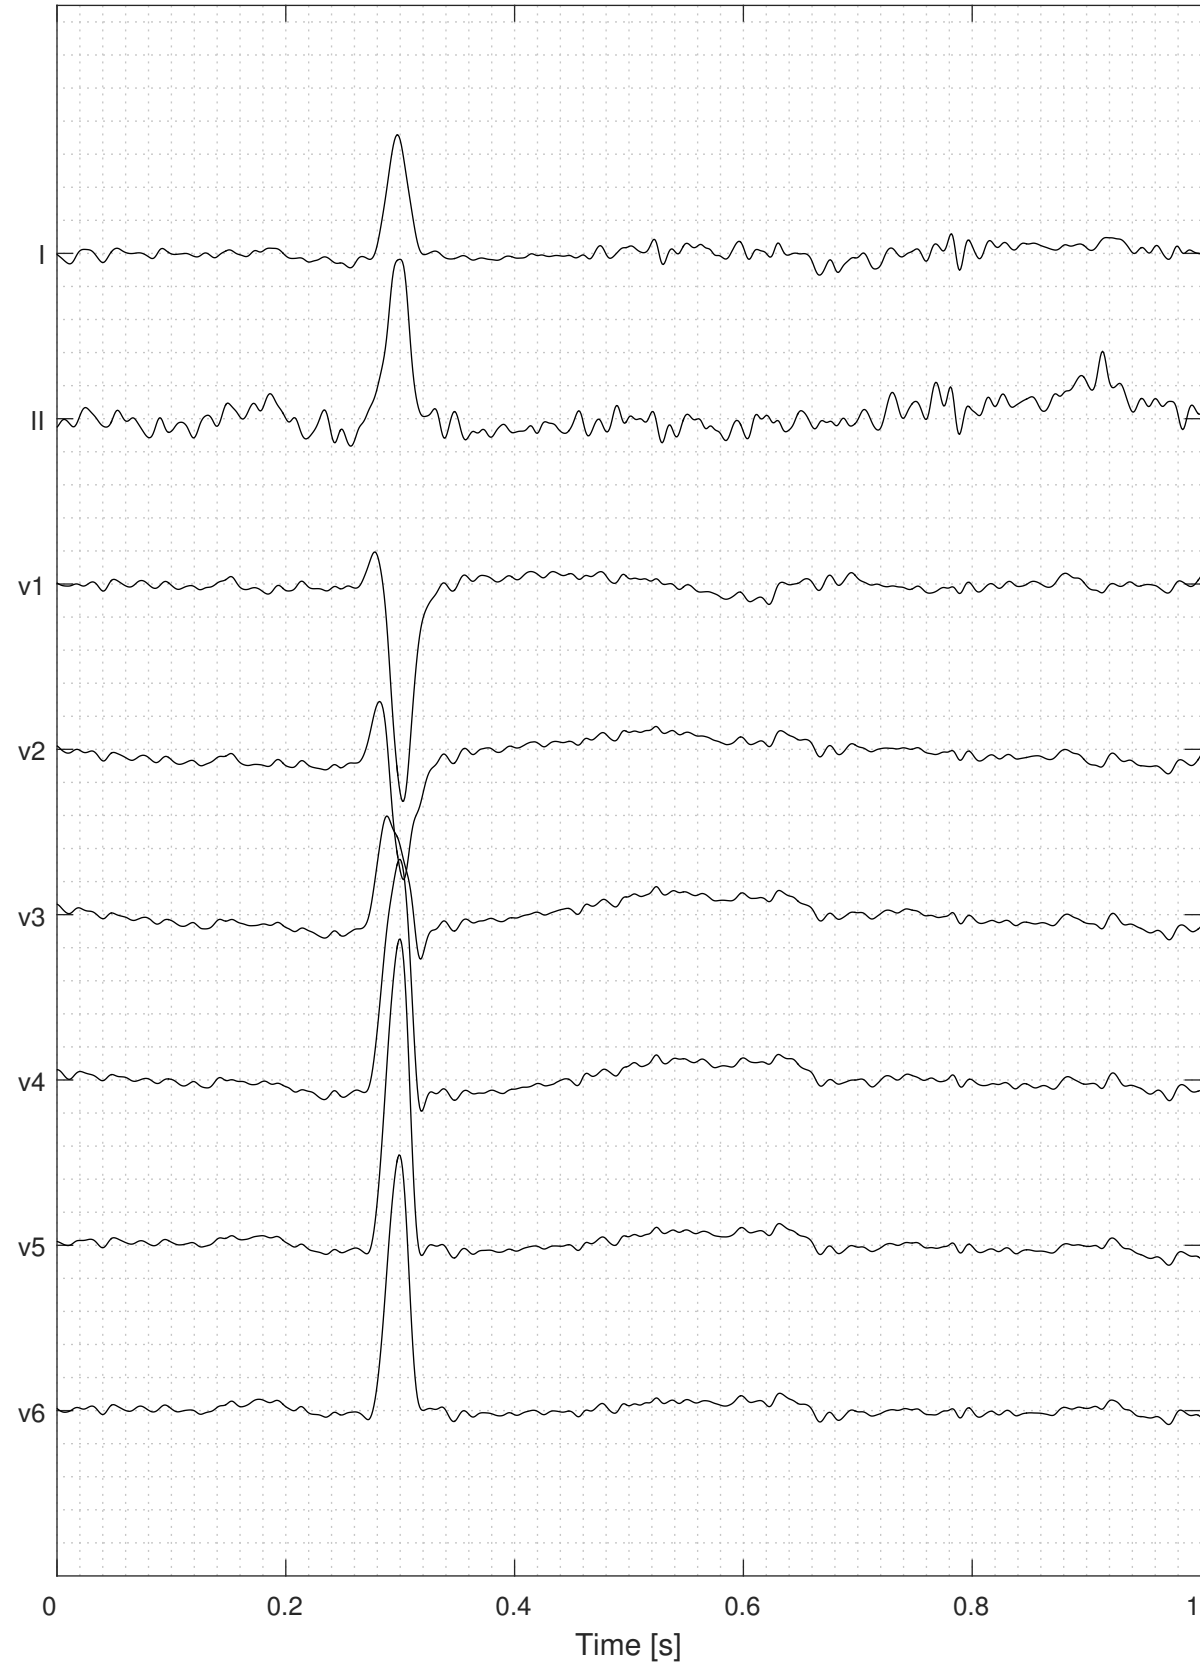

High RR, Complex #: 170

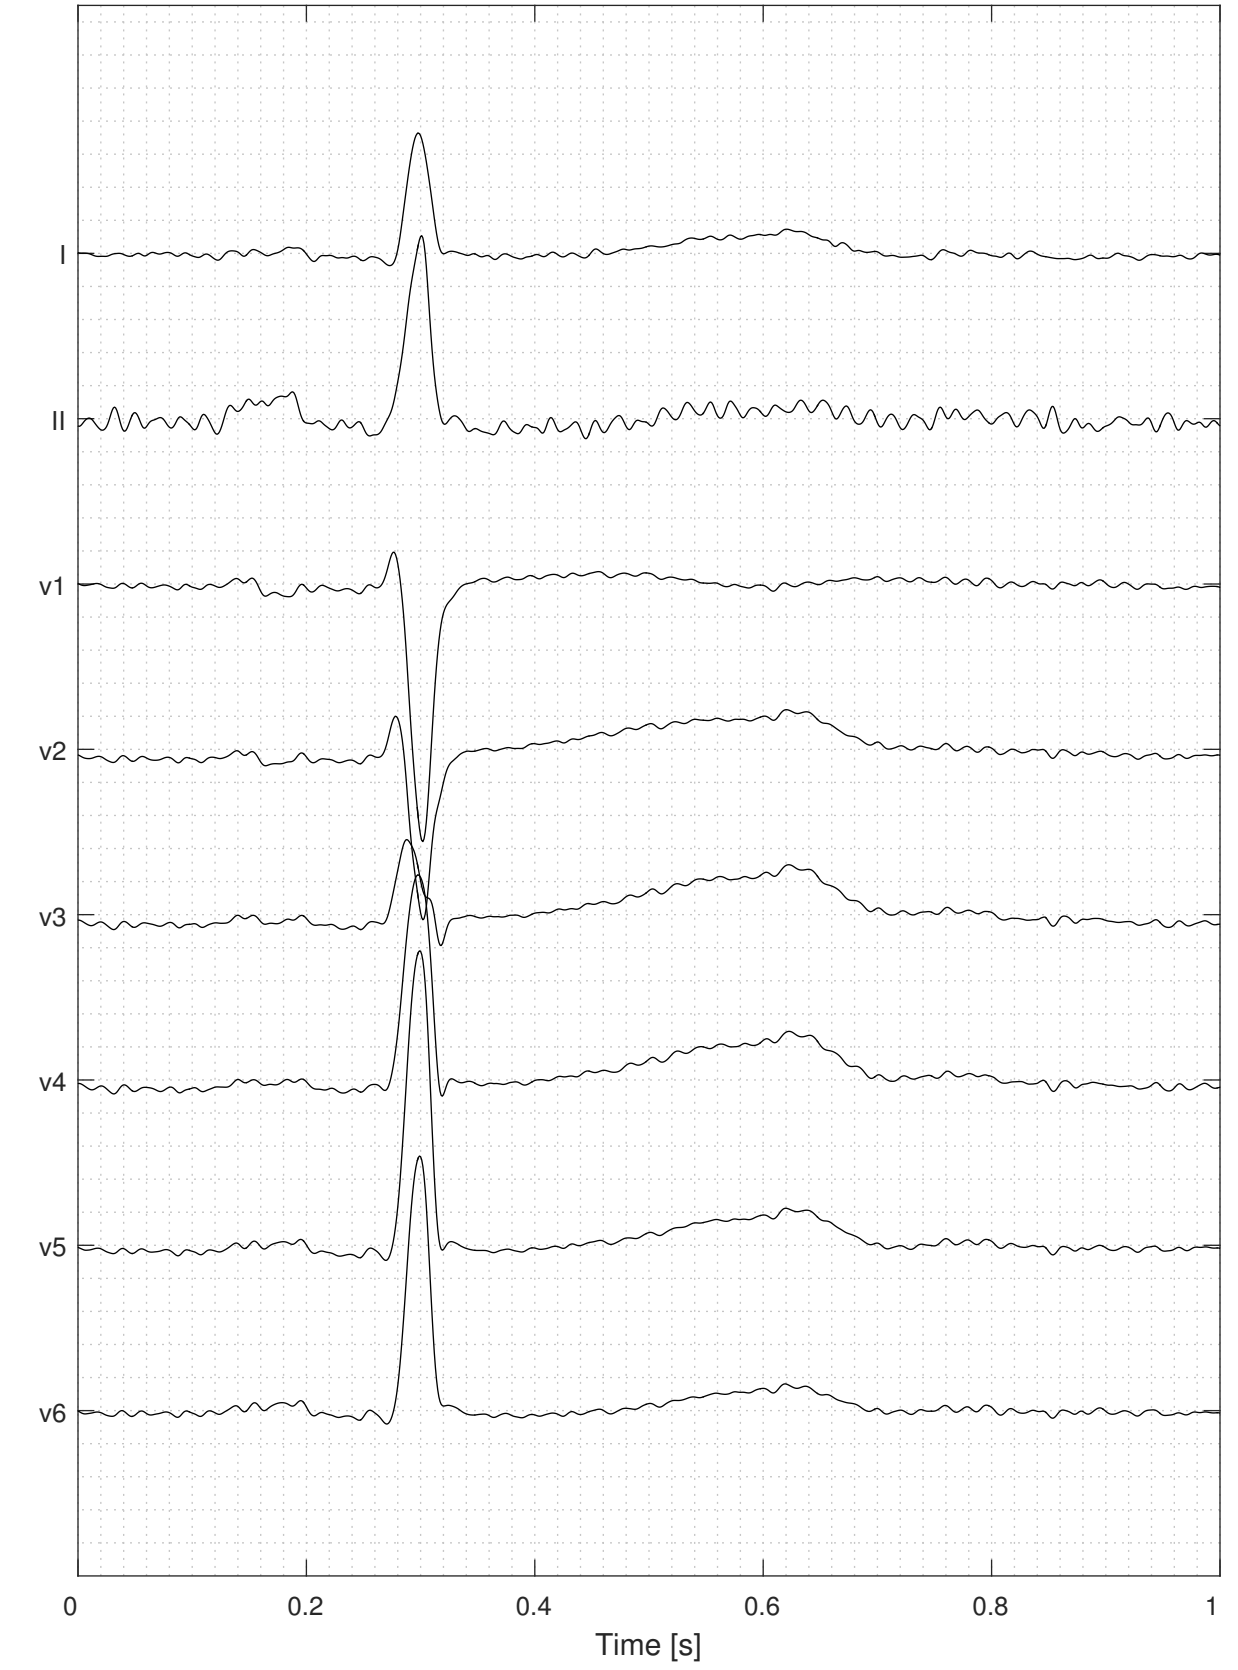

Patient 106

Low RR, Complex #: 214

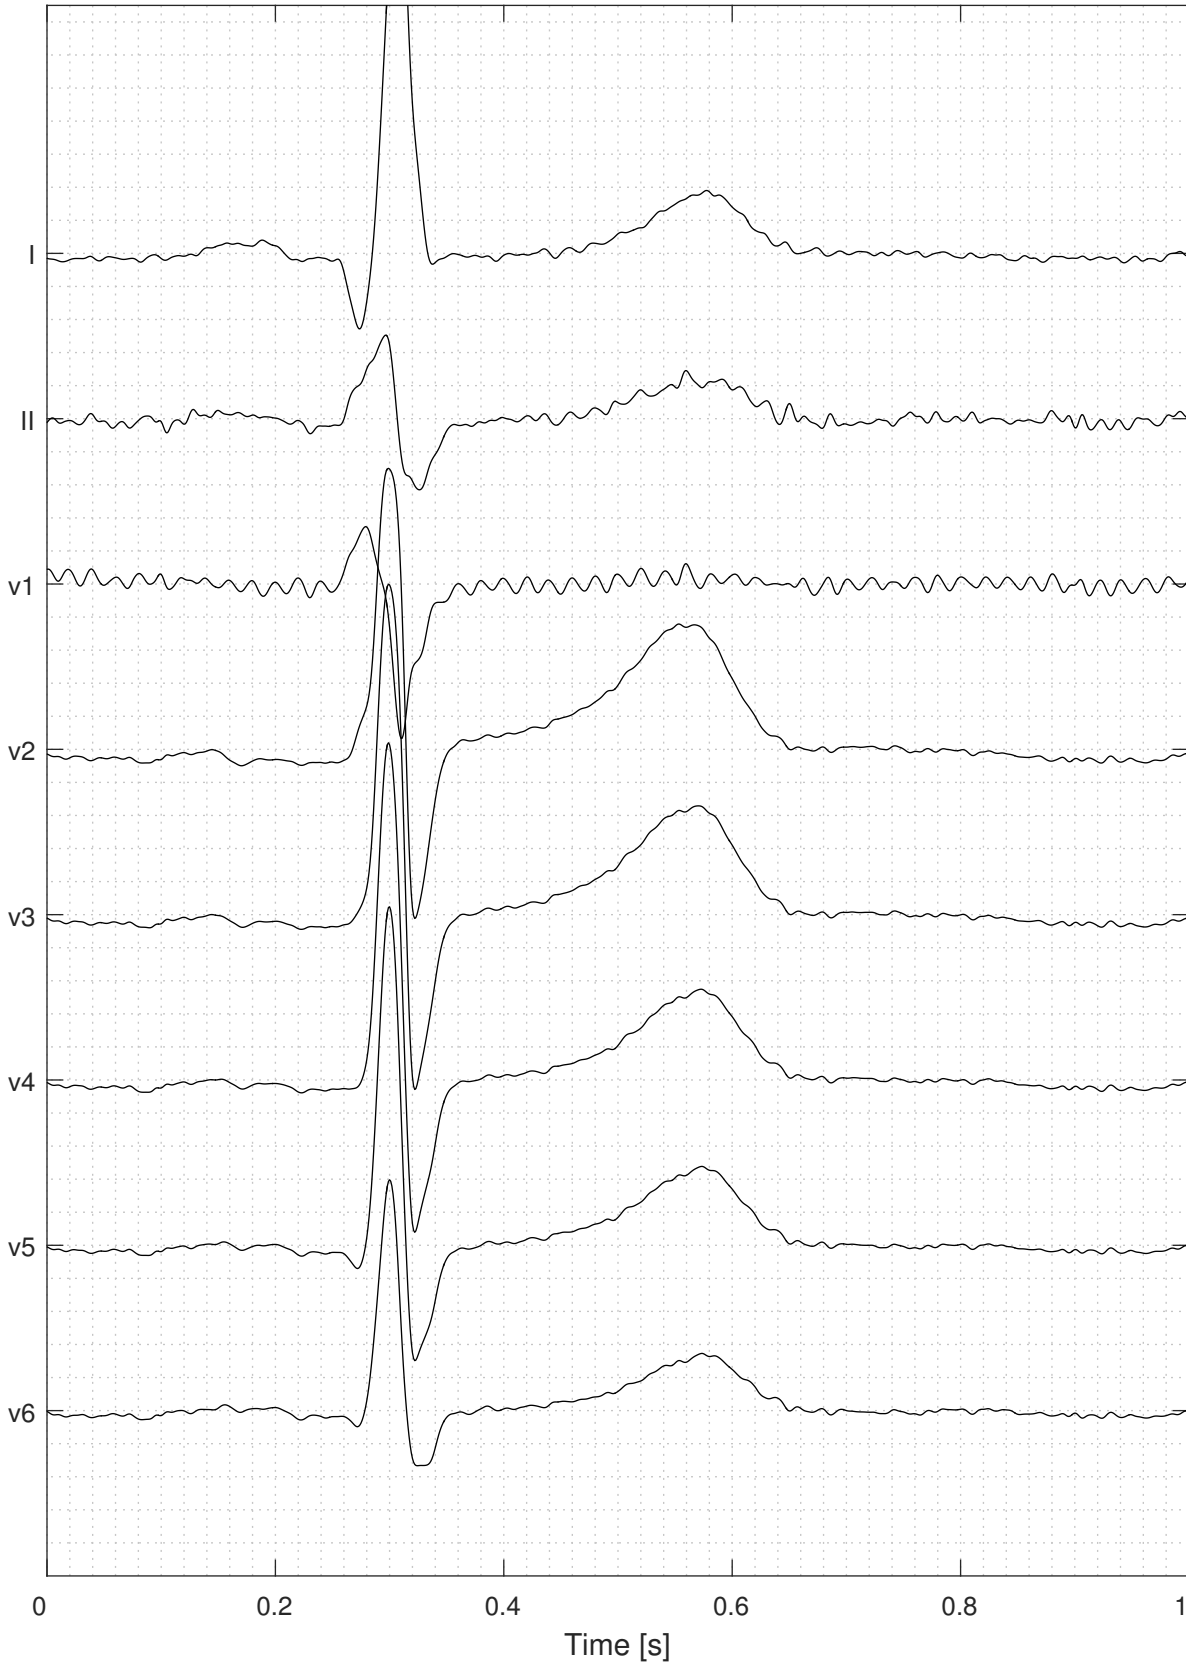

Mid RR, Complex #: 205

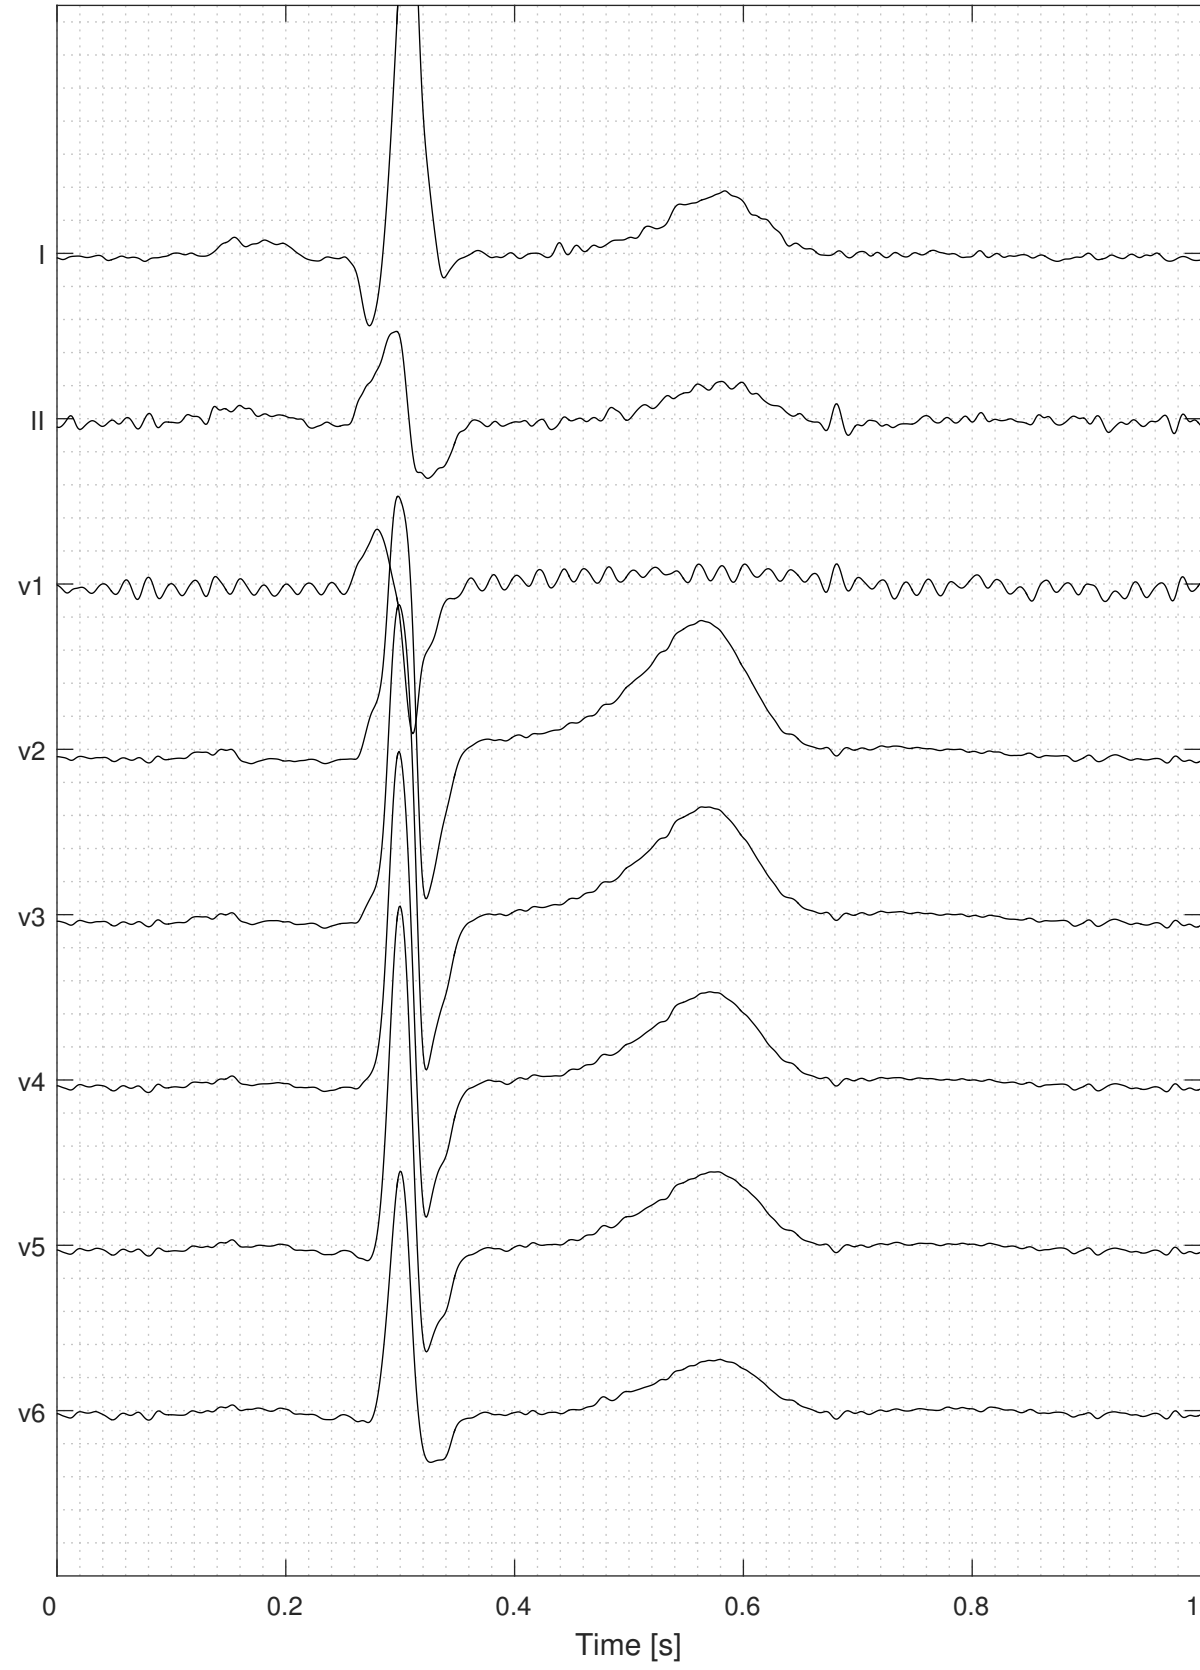

High RR, Complex #: 15

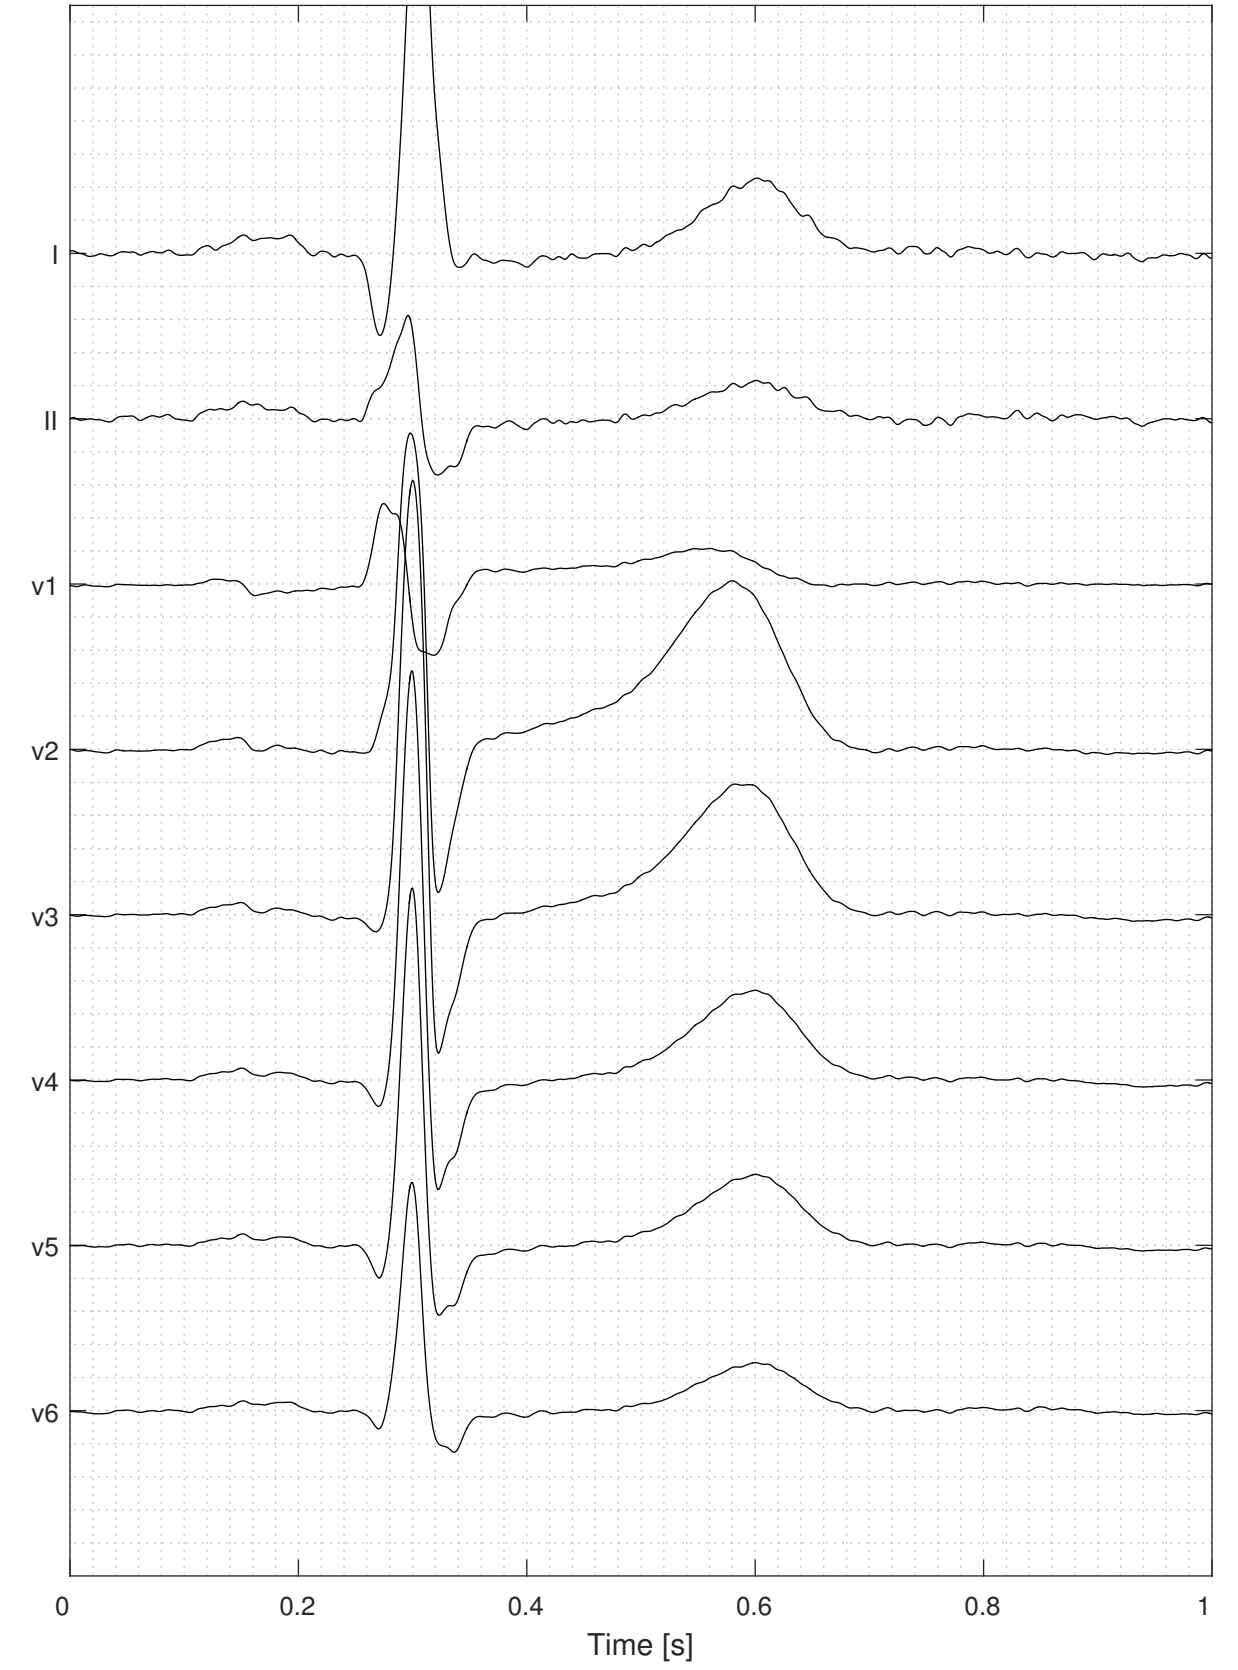

Patient 107

Low RR, Complex #: 376

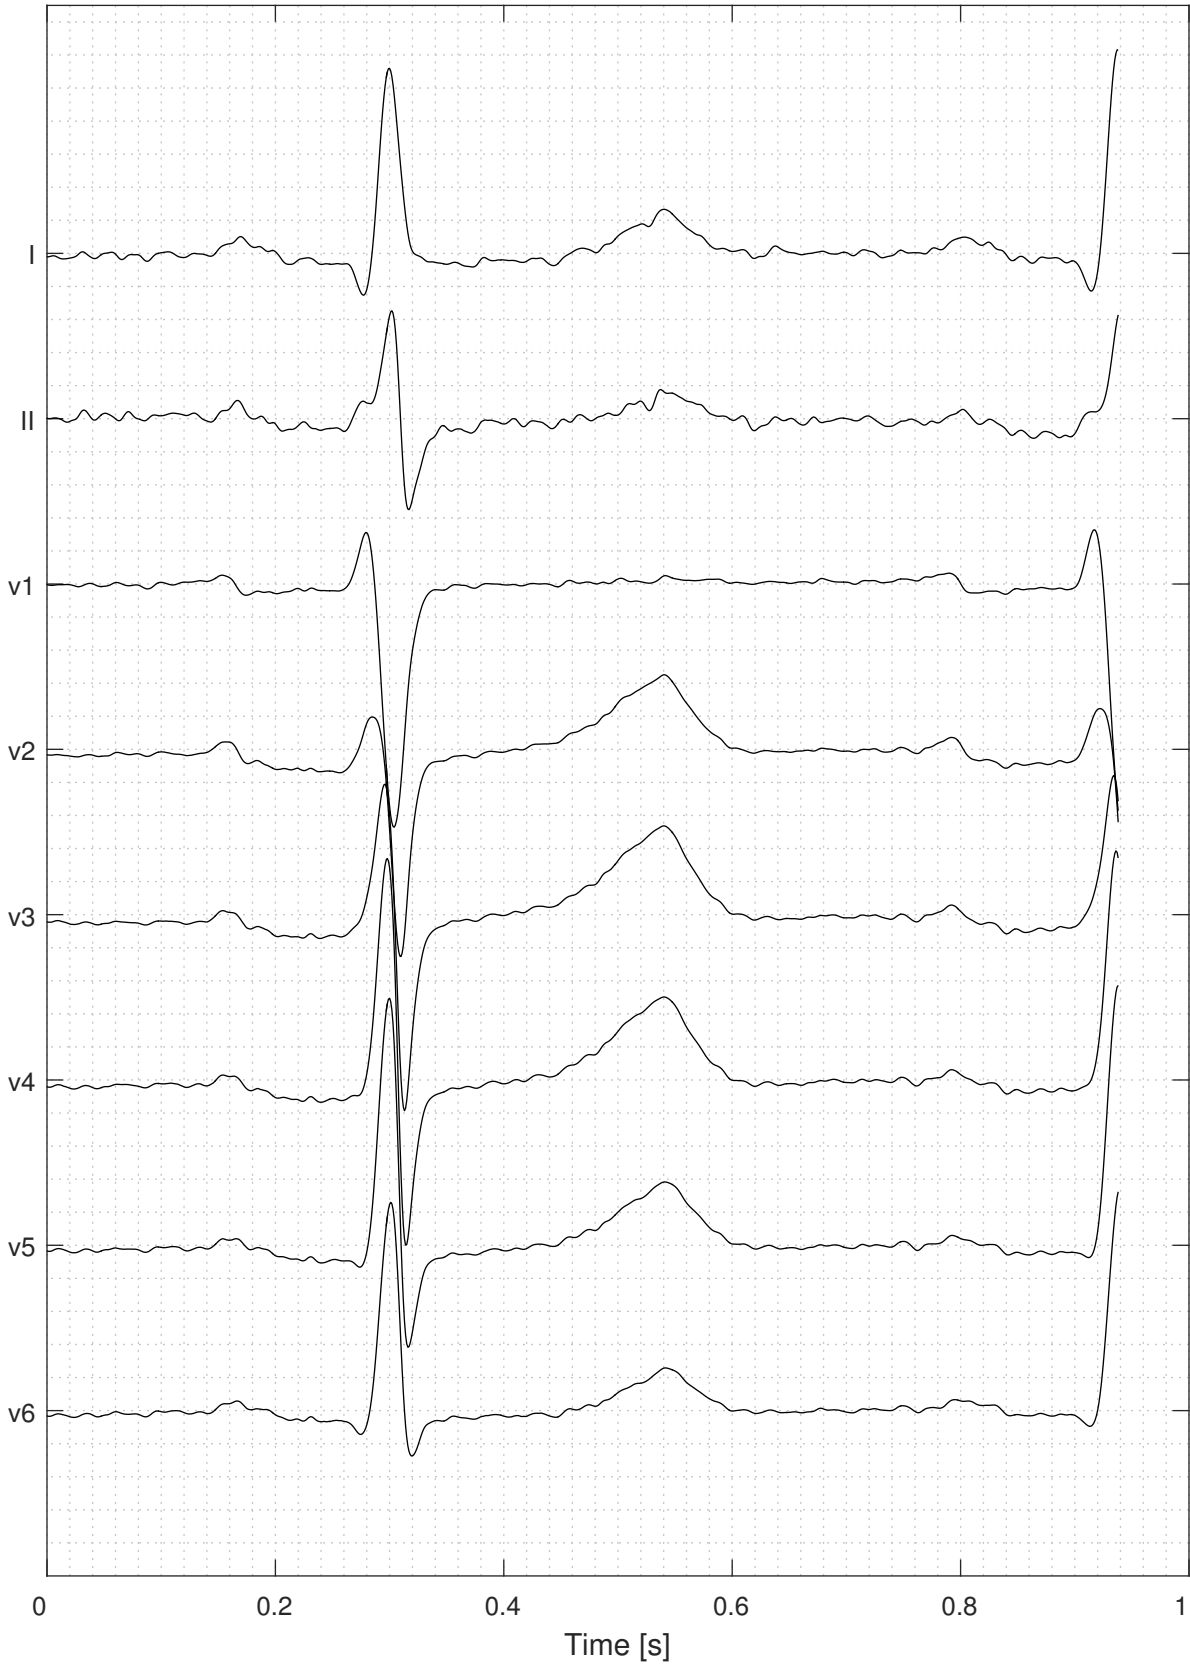

Mid RR, Complex #: 225

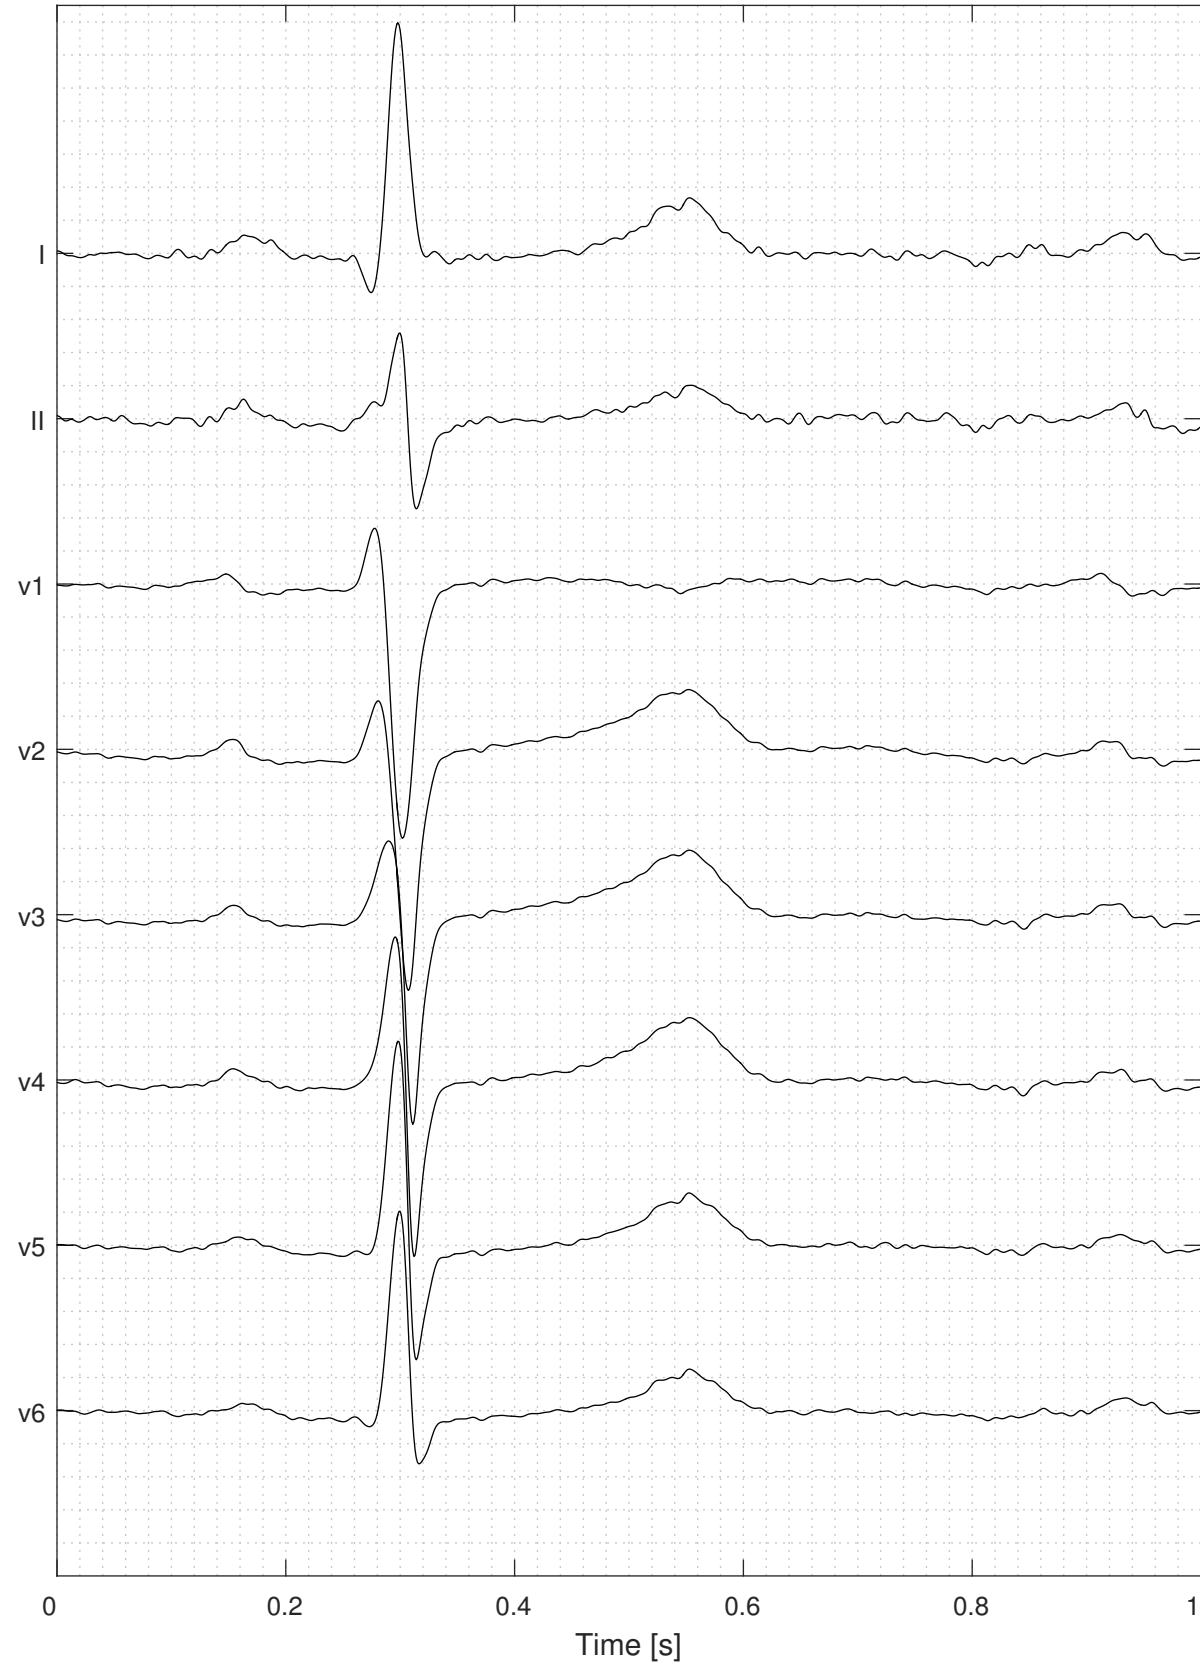

High RR, Complex #: 58

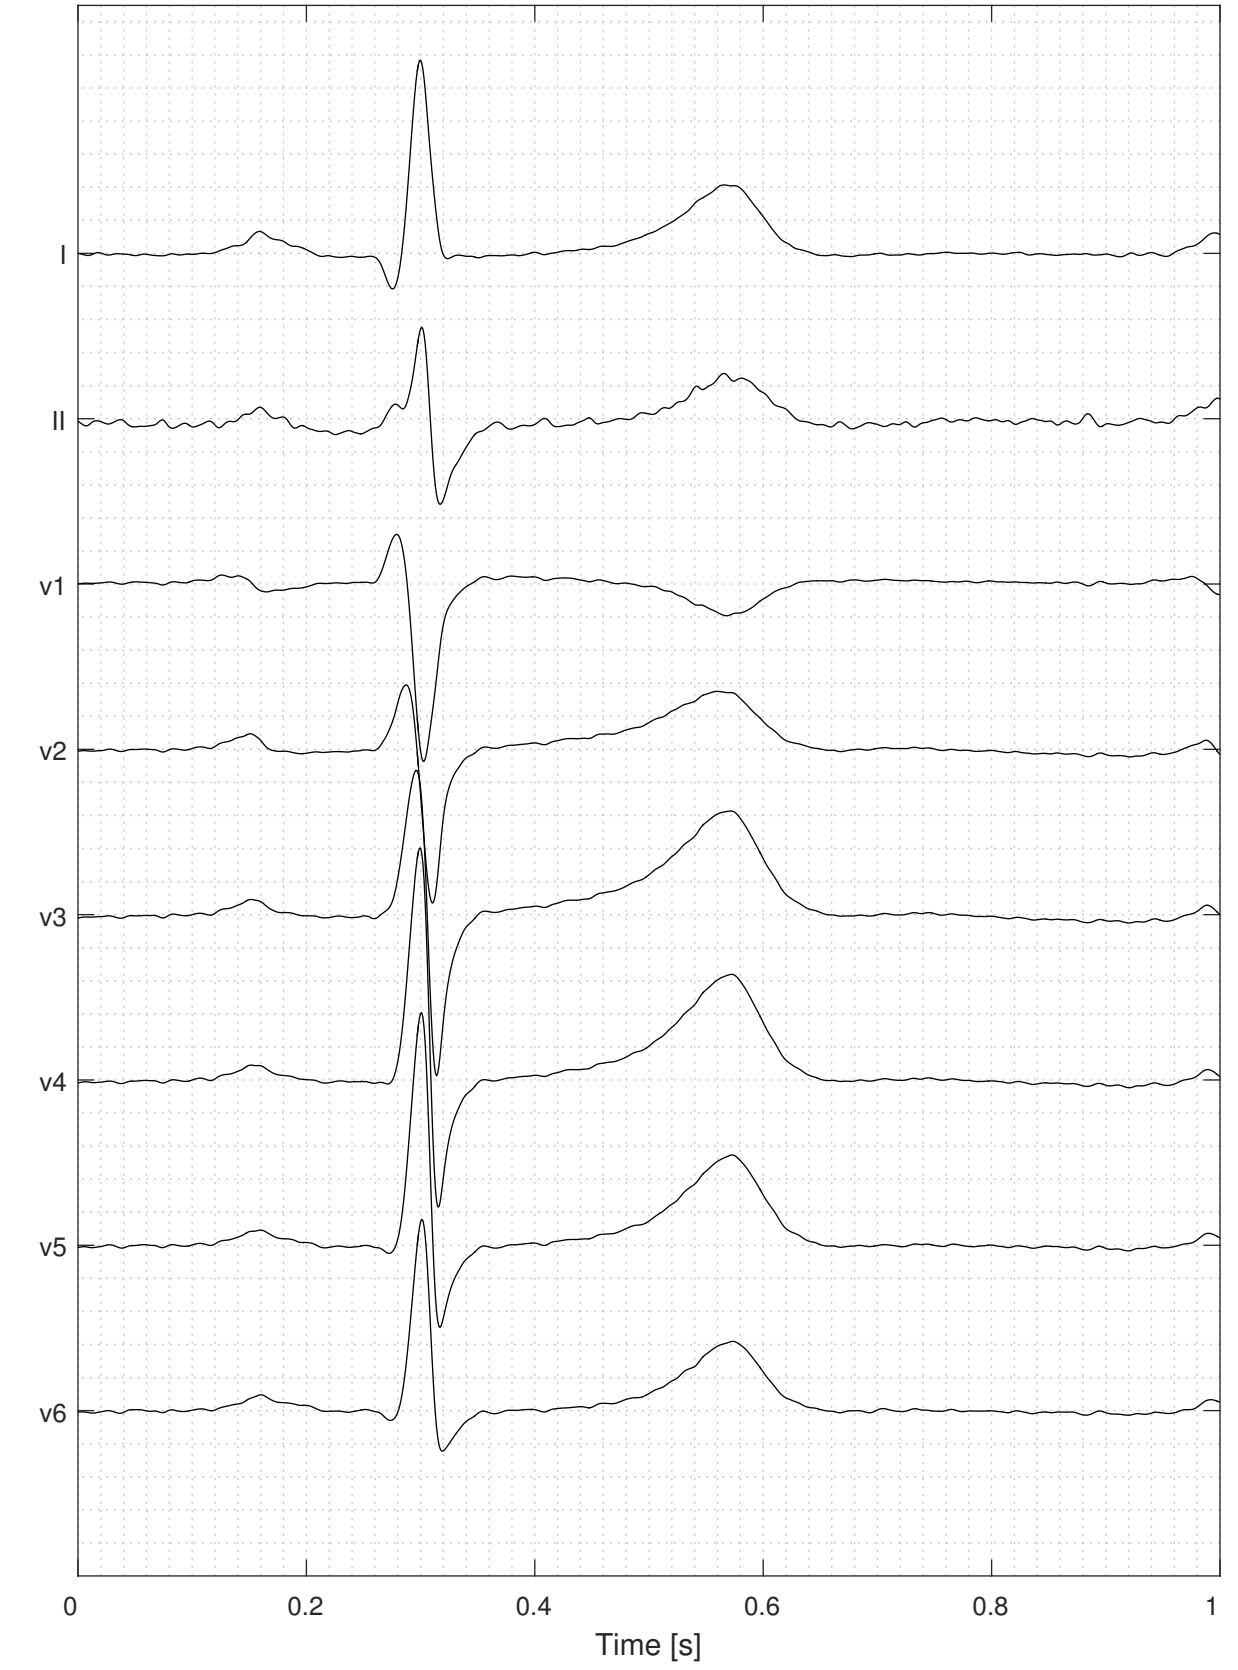

Patient 108

Low RR, Complex #: 143

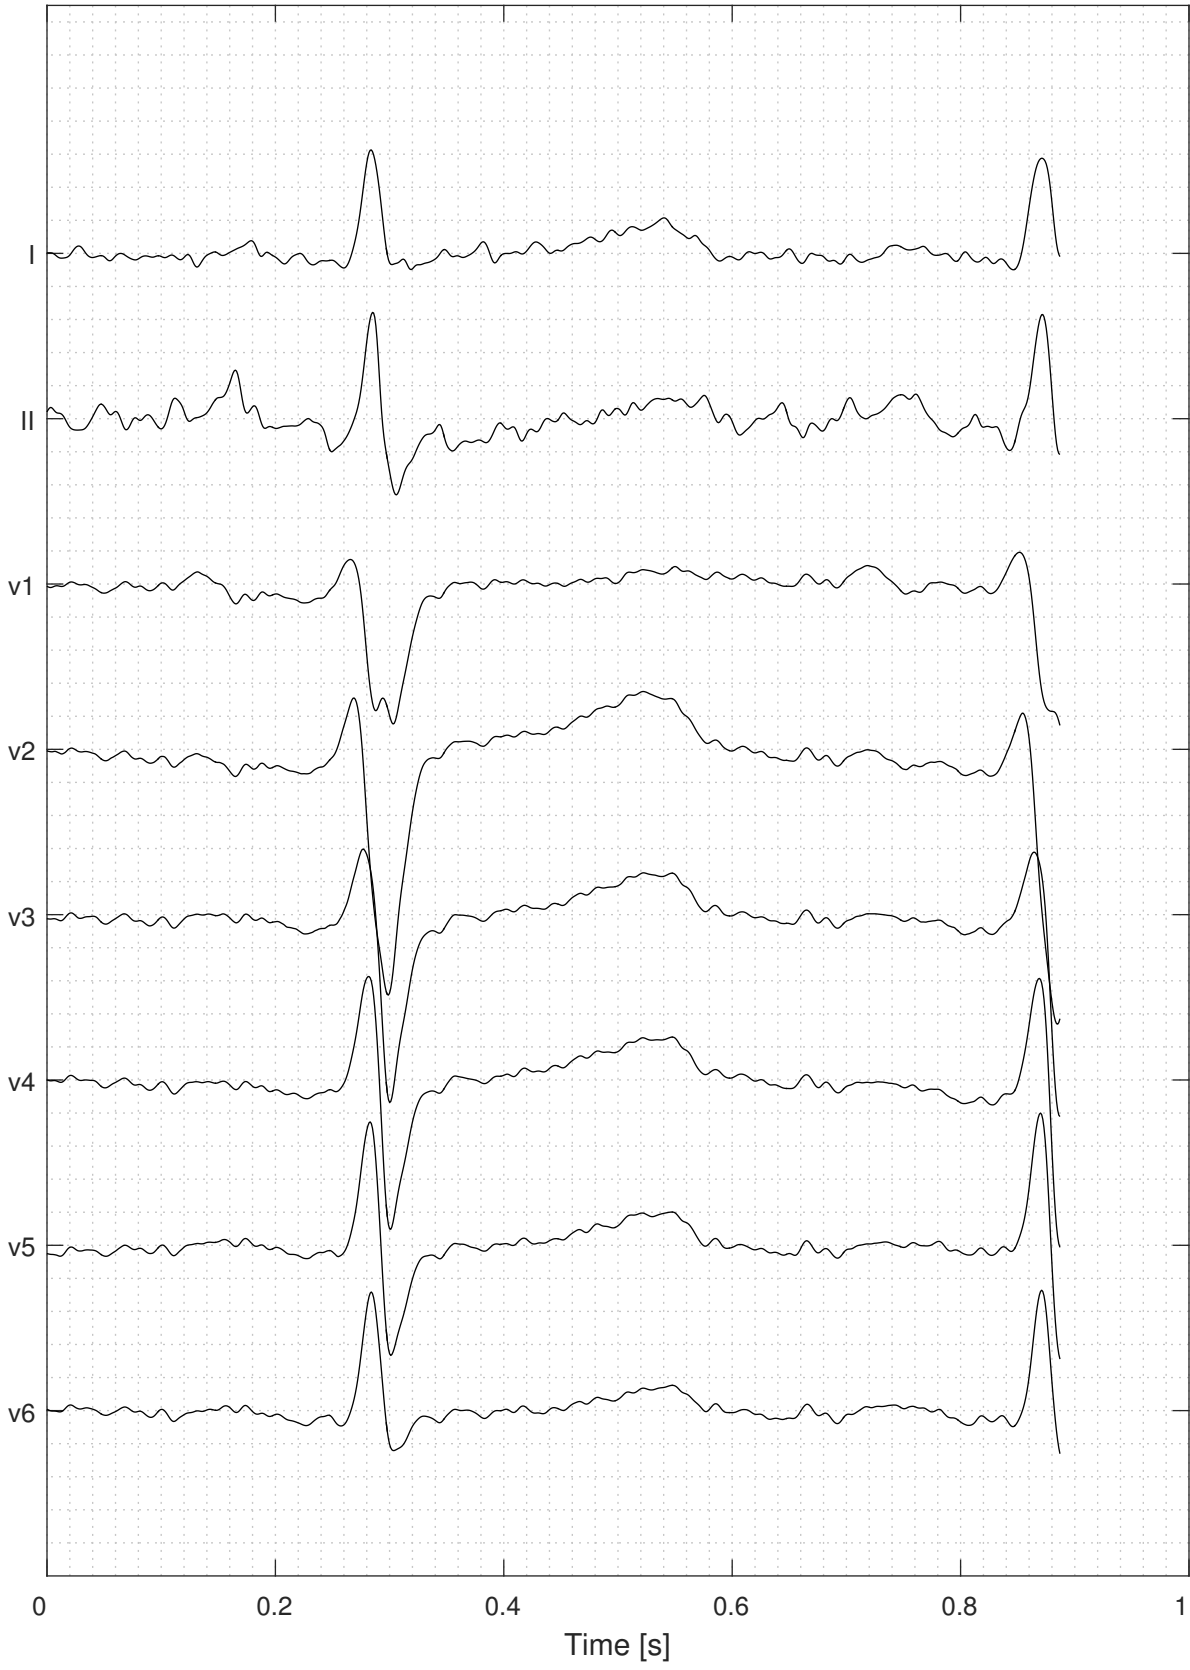

Mid RR, Complex #: 331

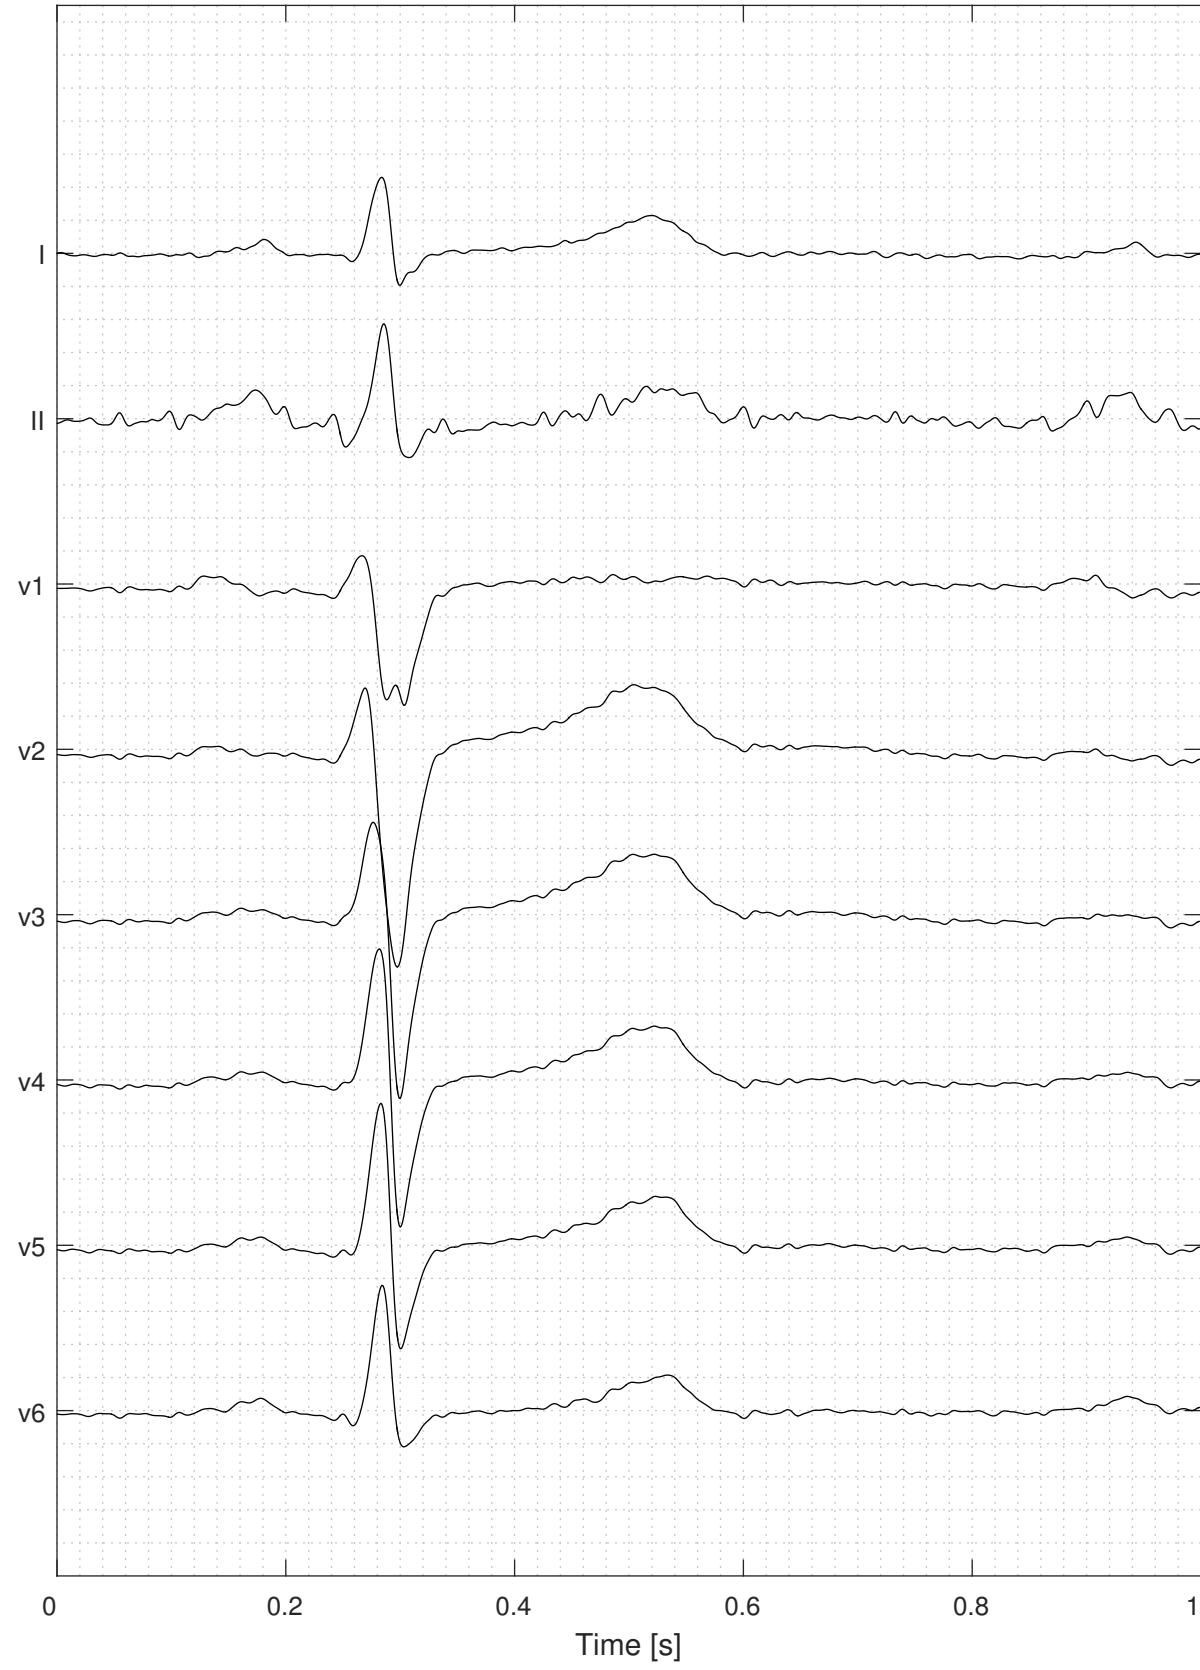

High RR, Complex #: 62

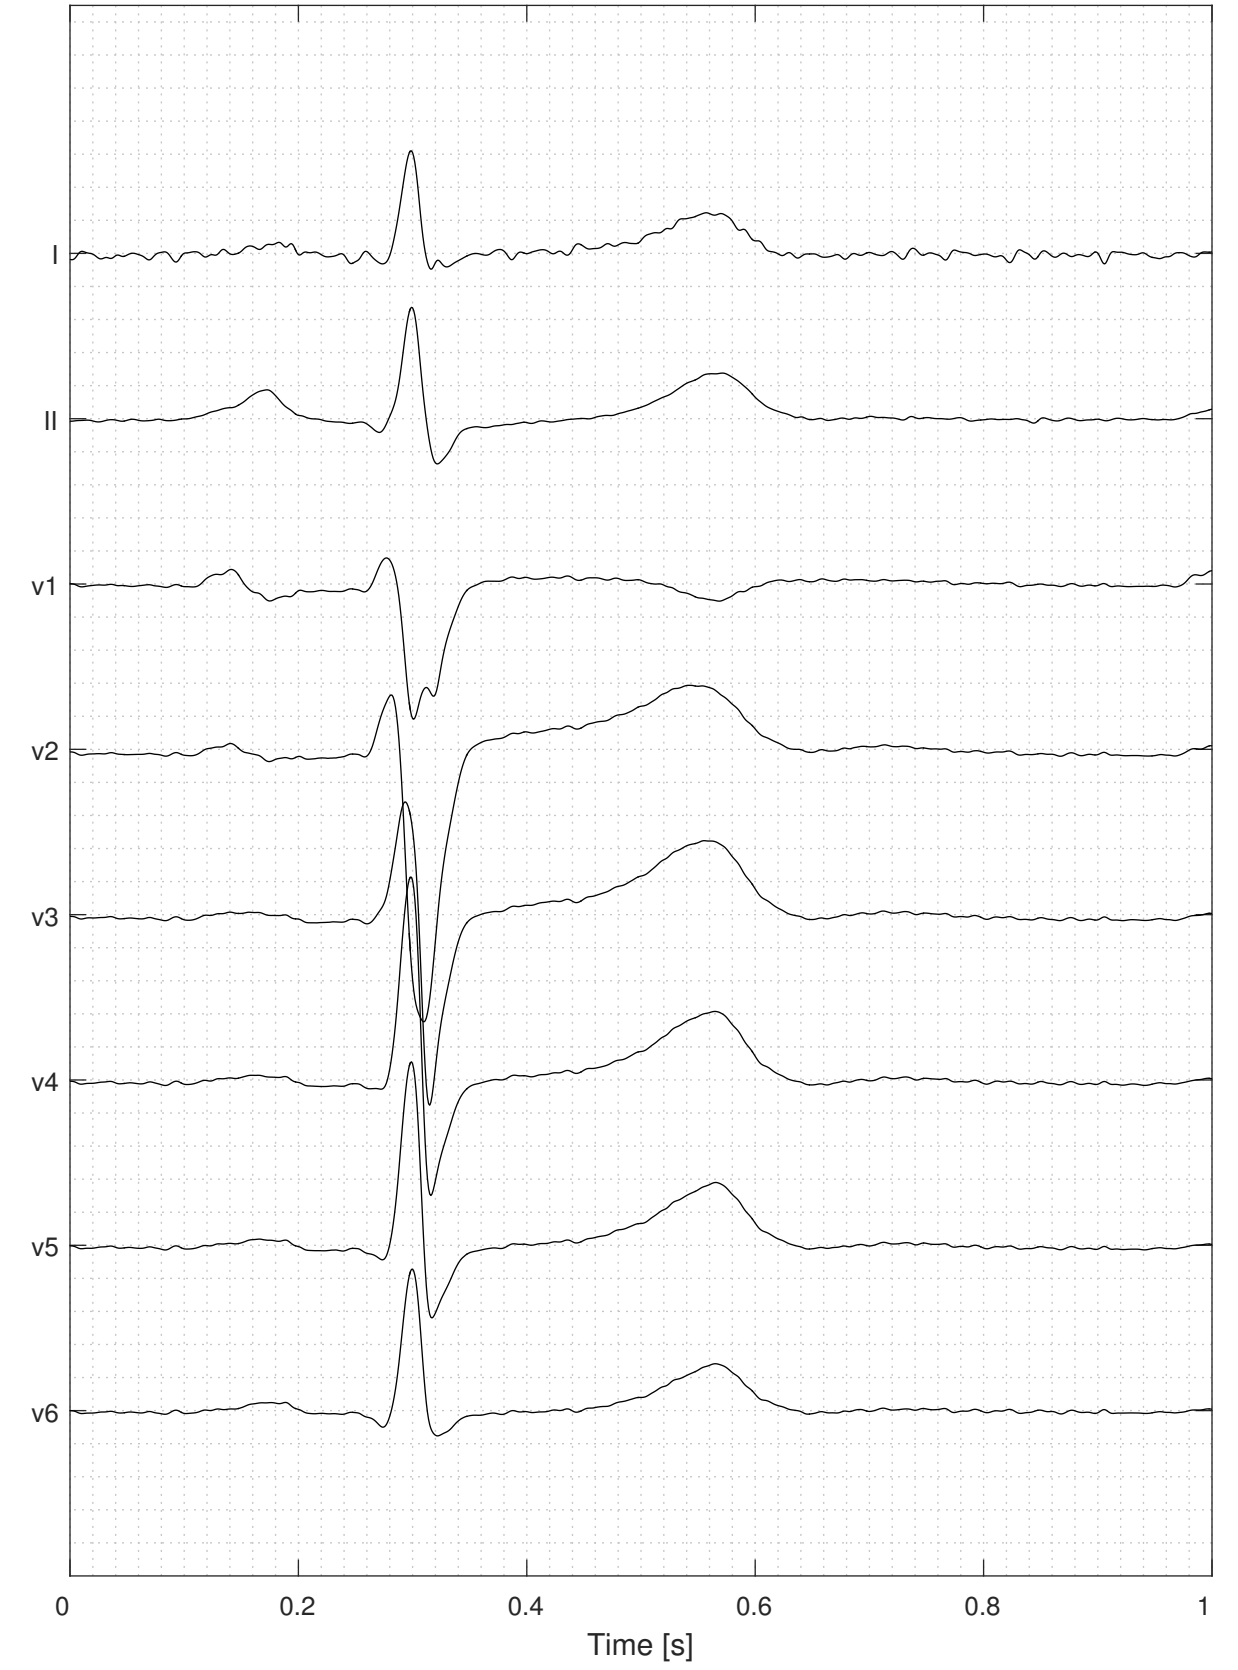

Patient 109

Low RR, Complex #: 142

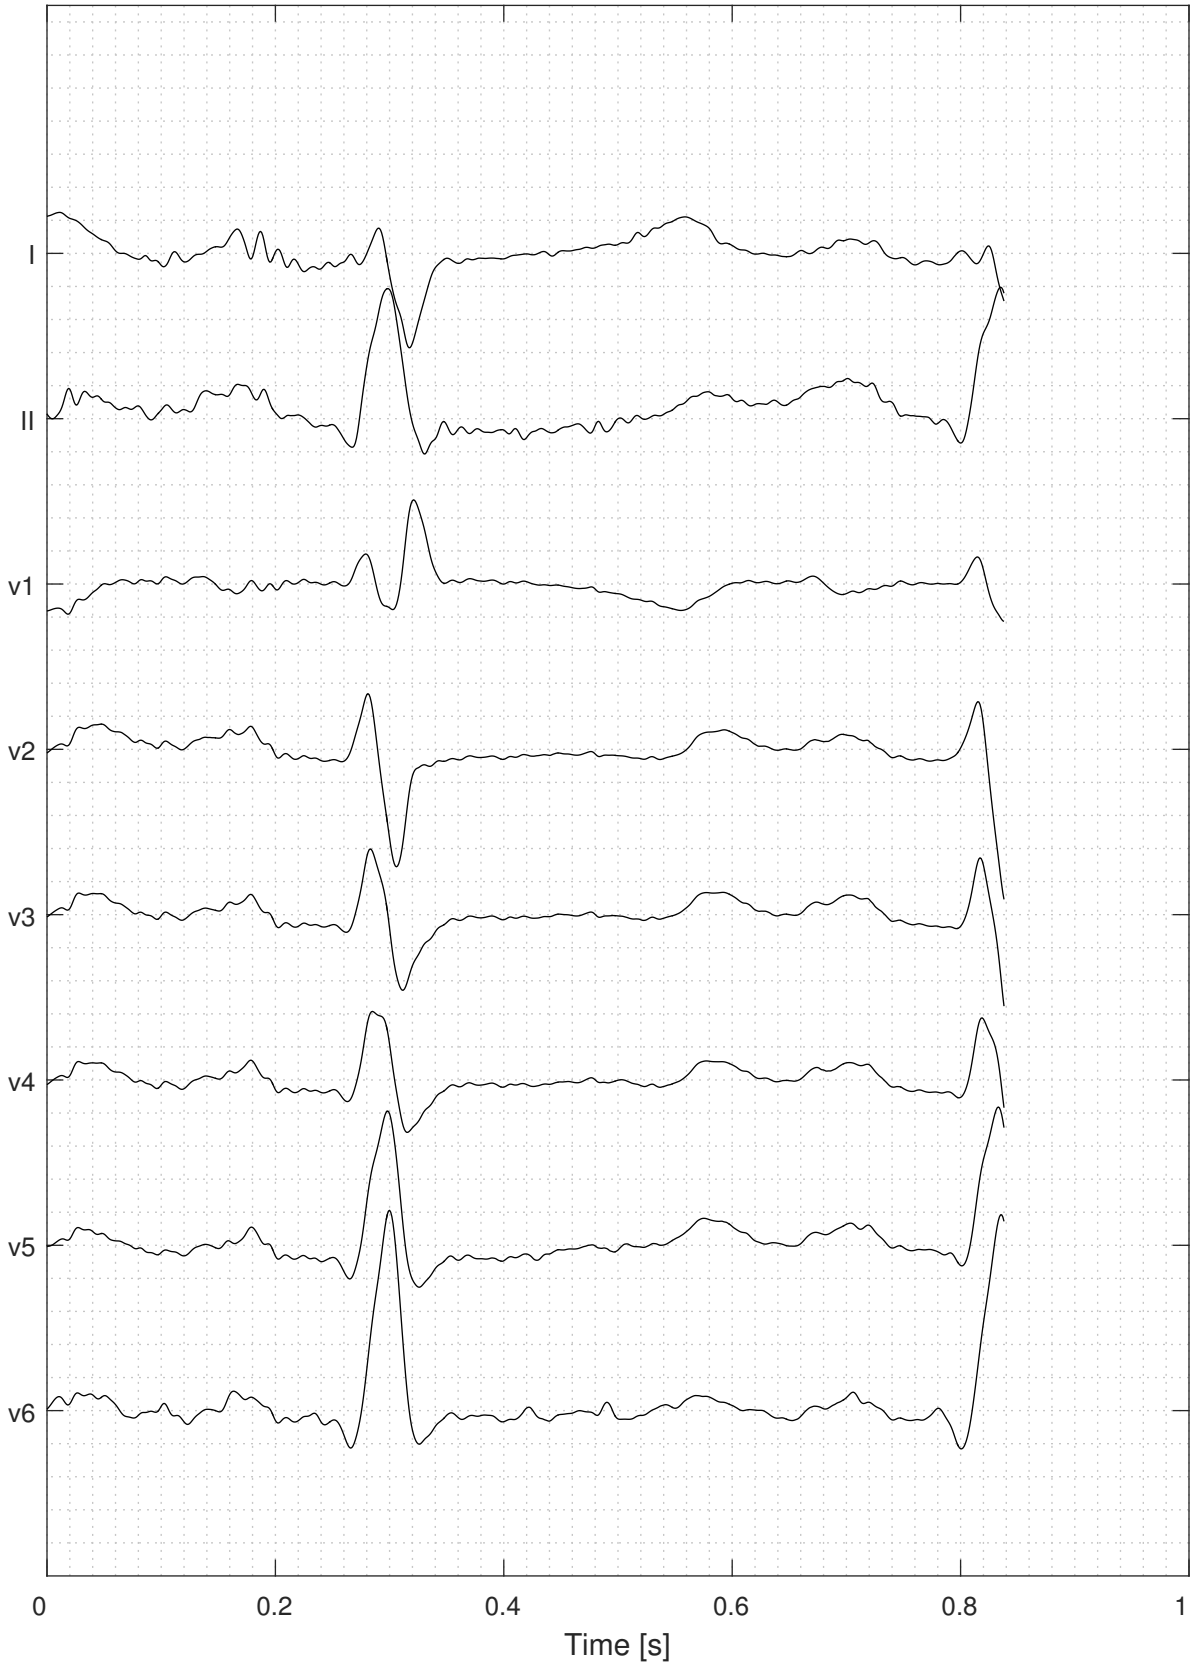

Mid RR, Complex #: 233

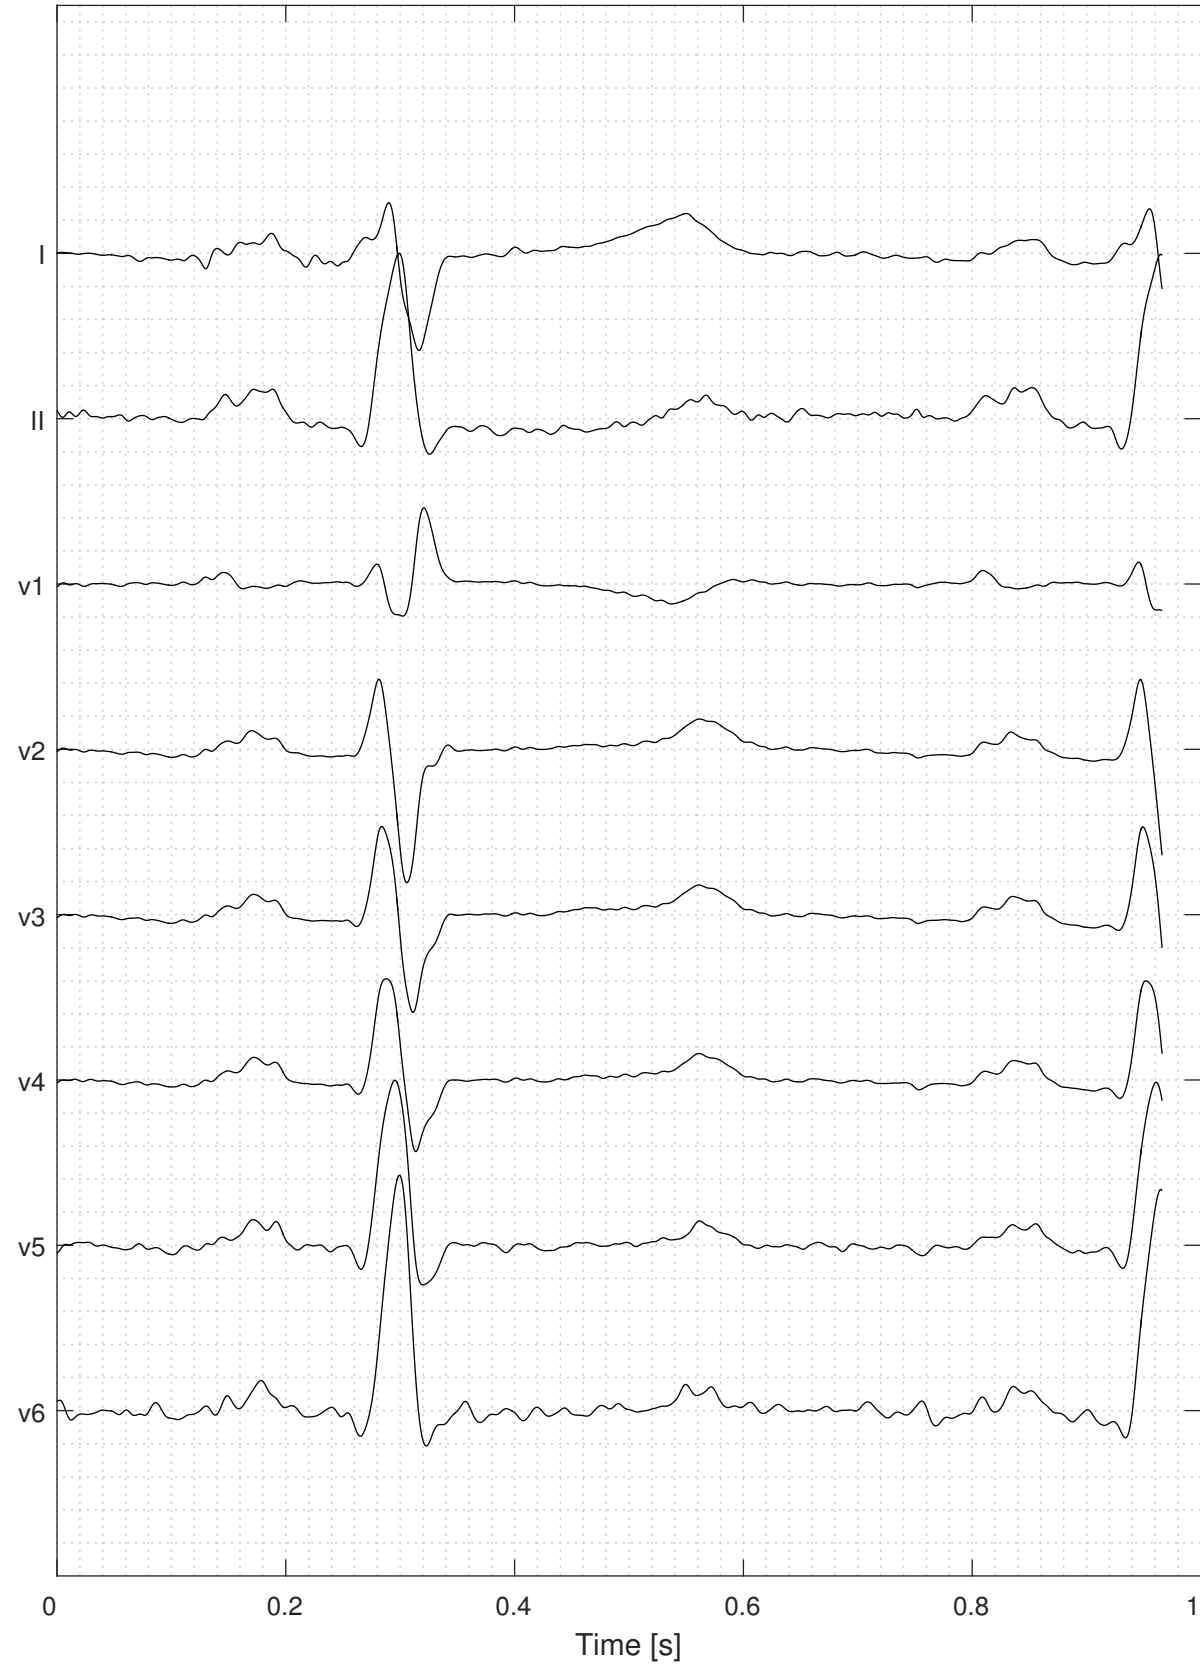

High RR, Complex #: 15

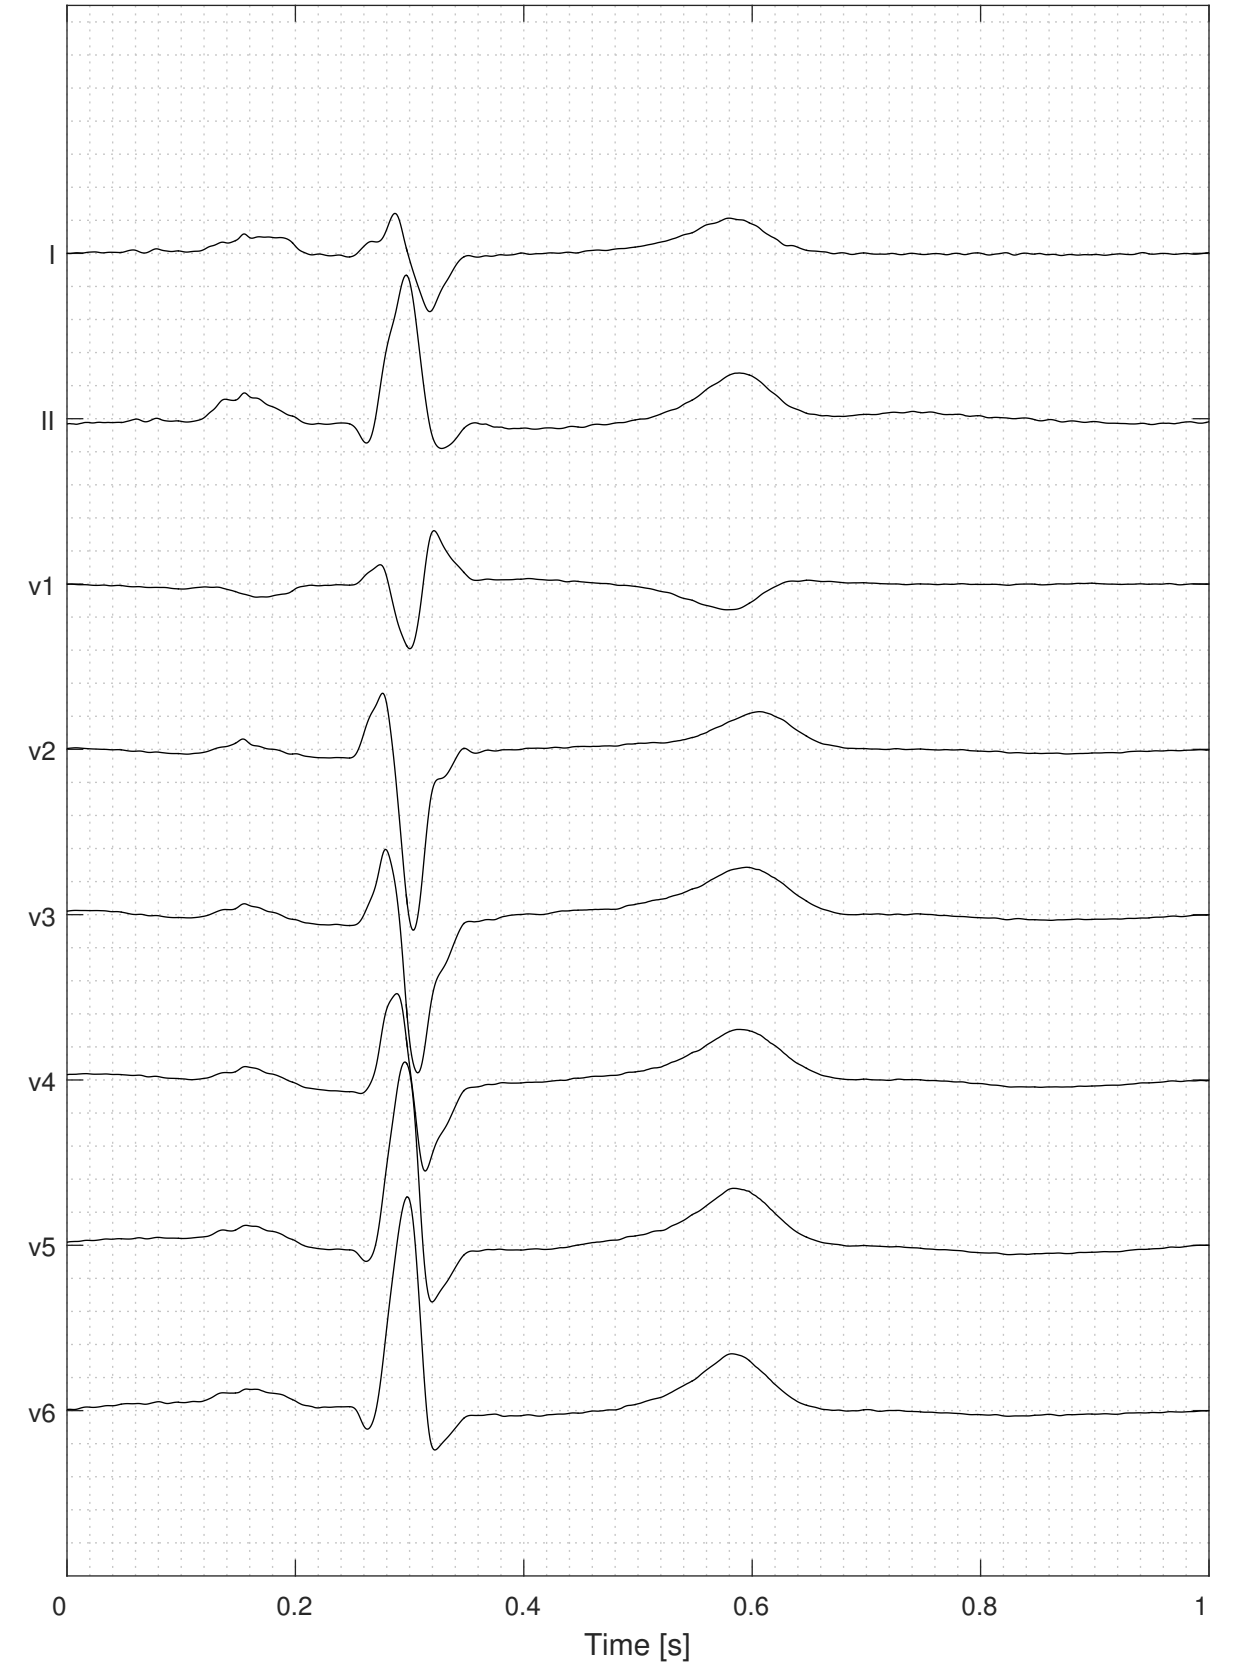

Patient 110

Low RR, Complex #: 363

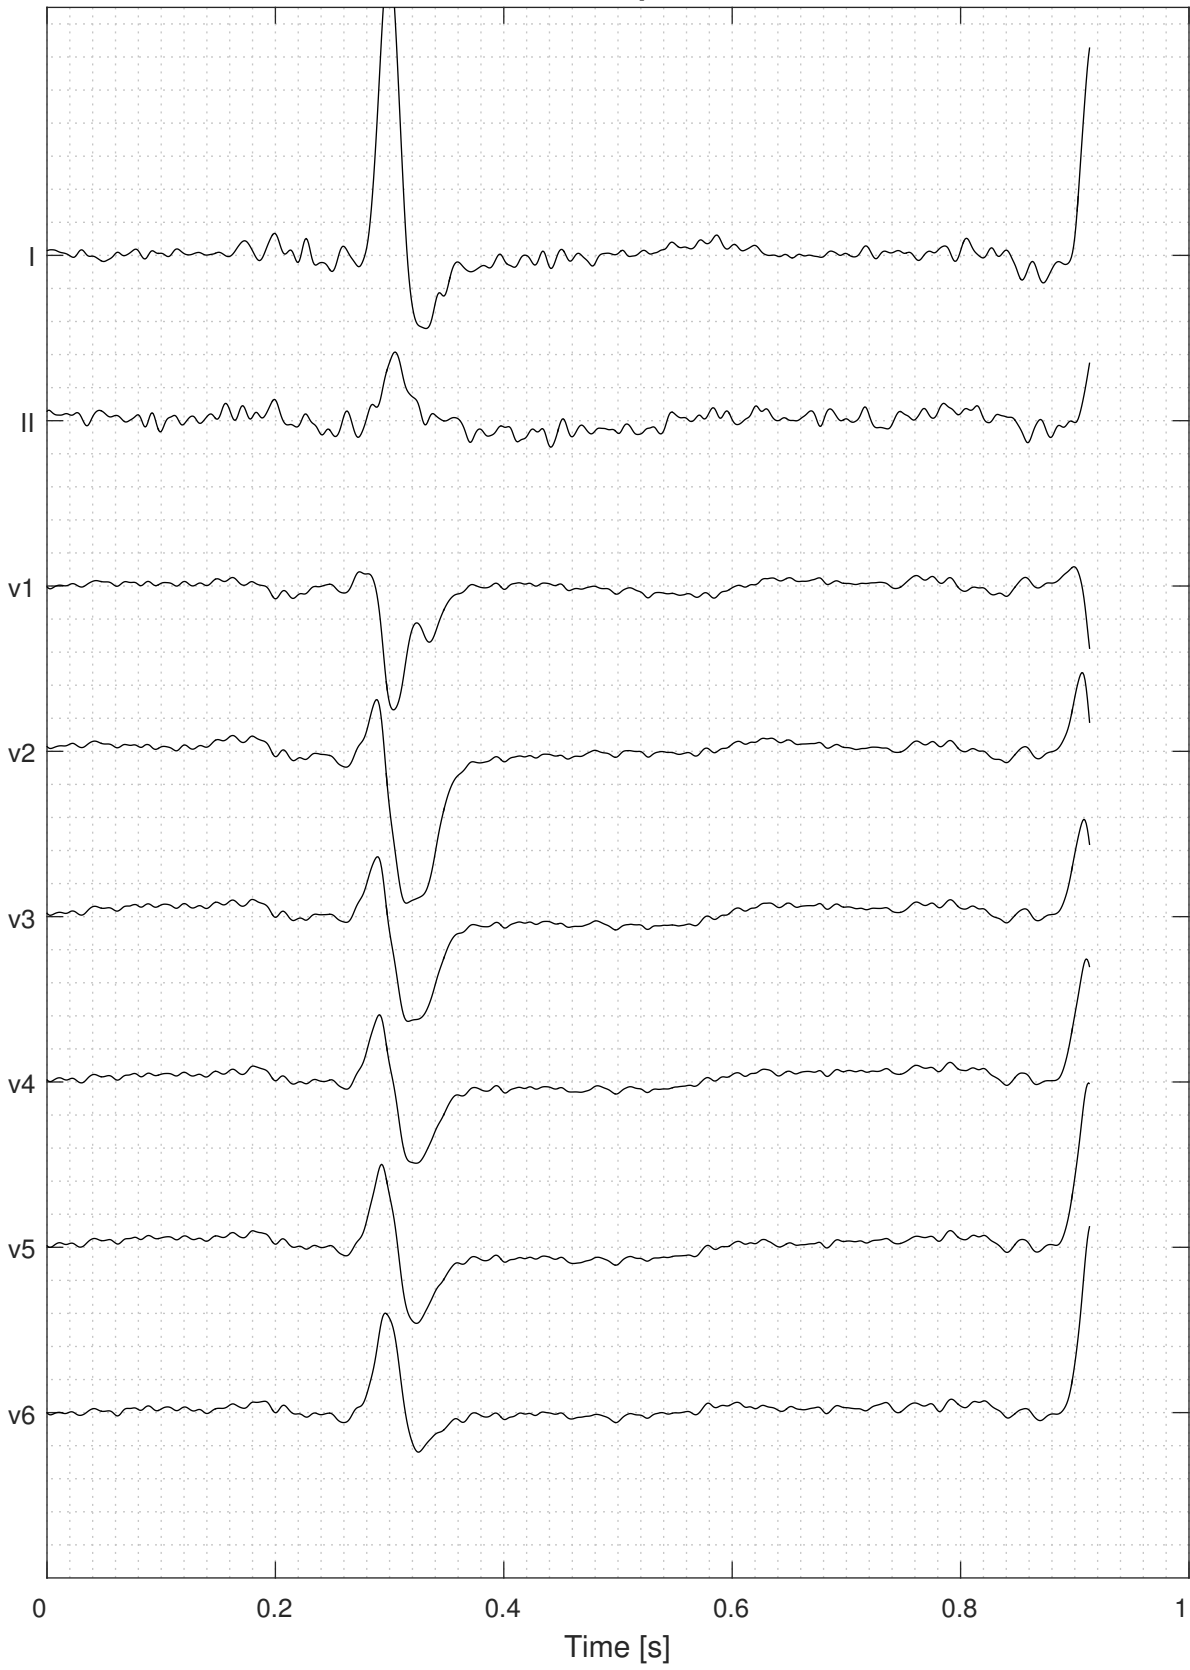

Mid RR, Complex #: 180

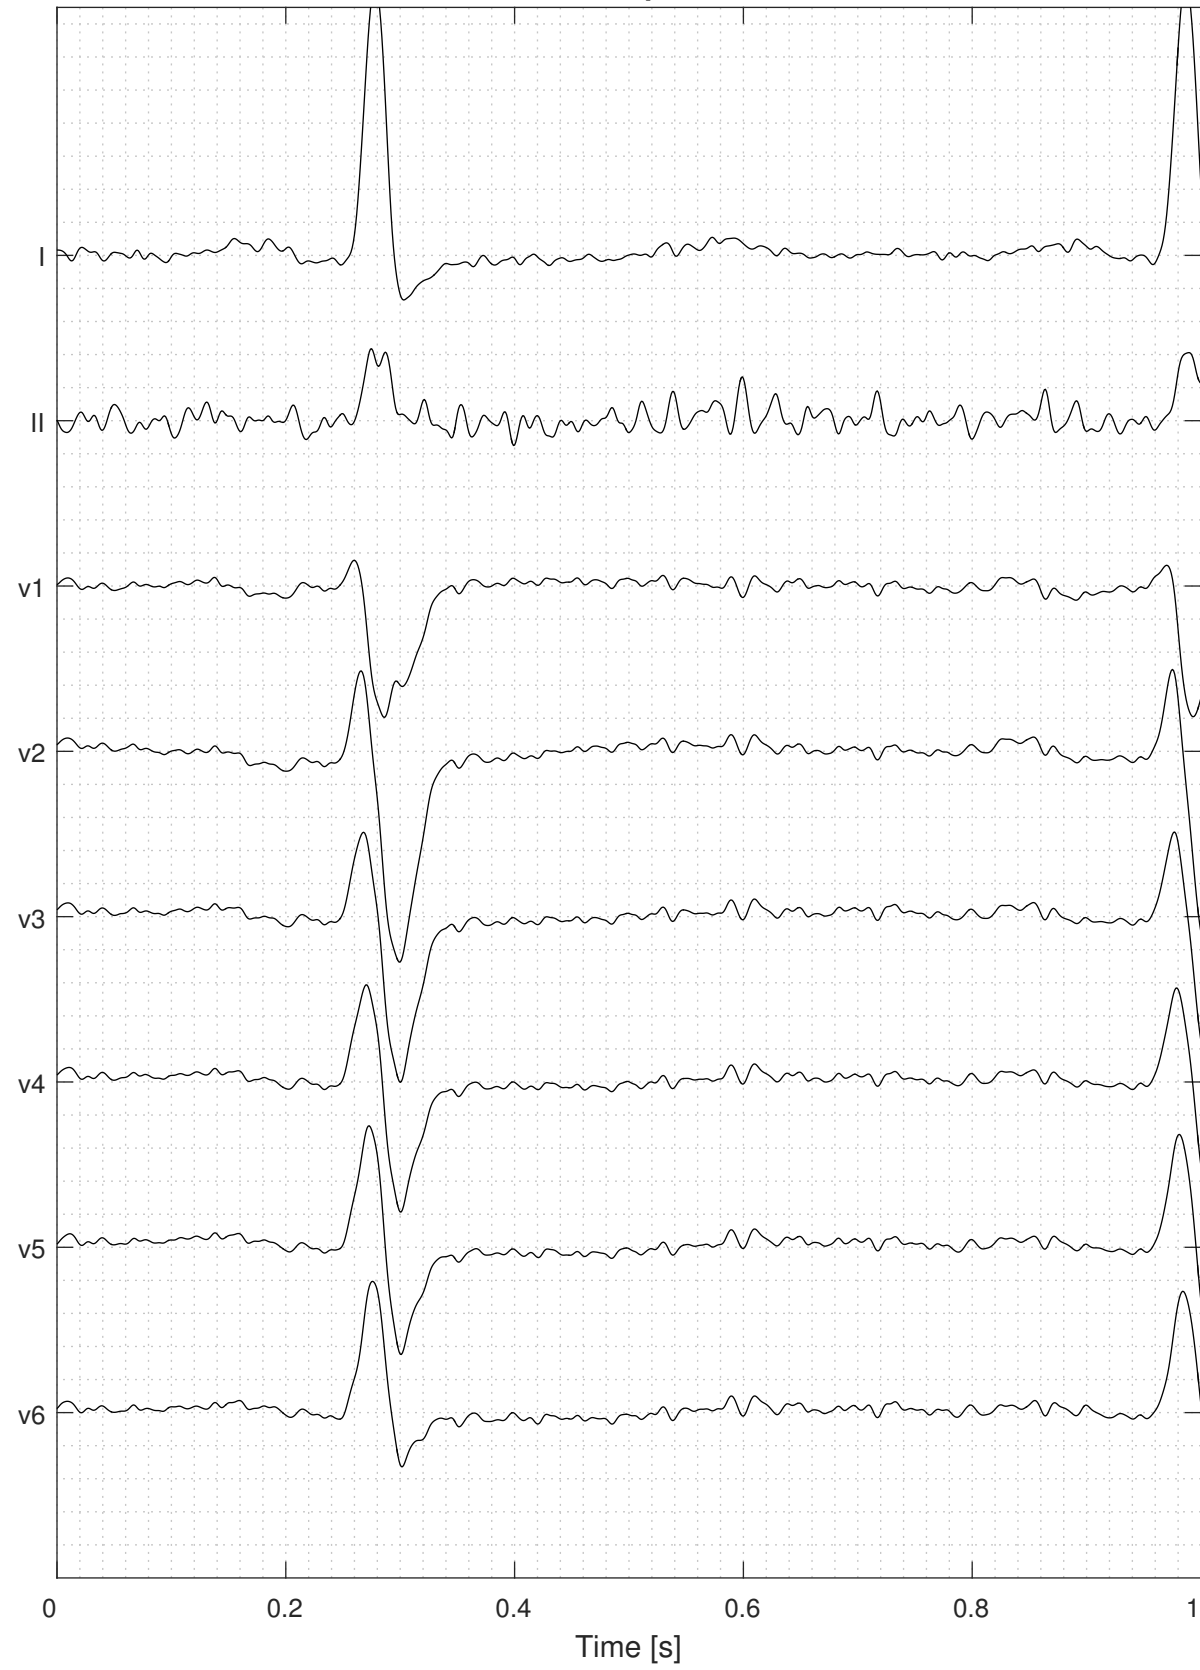

High RR, Complex #: 29

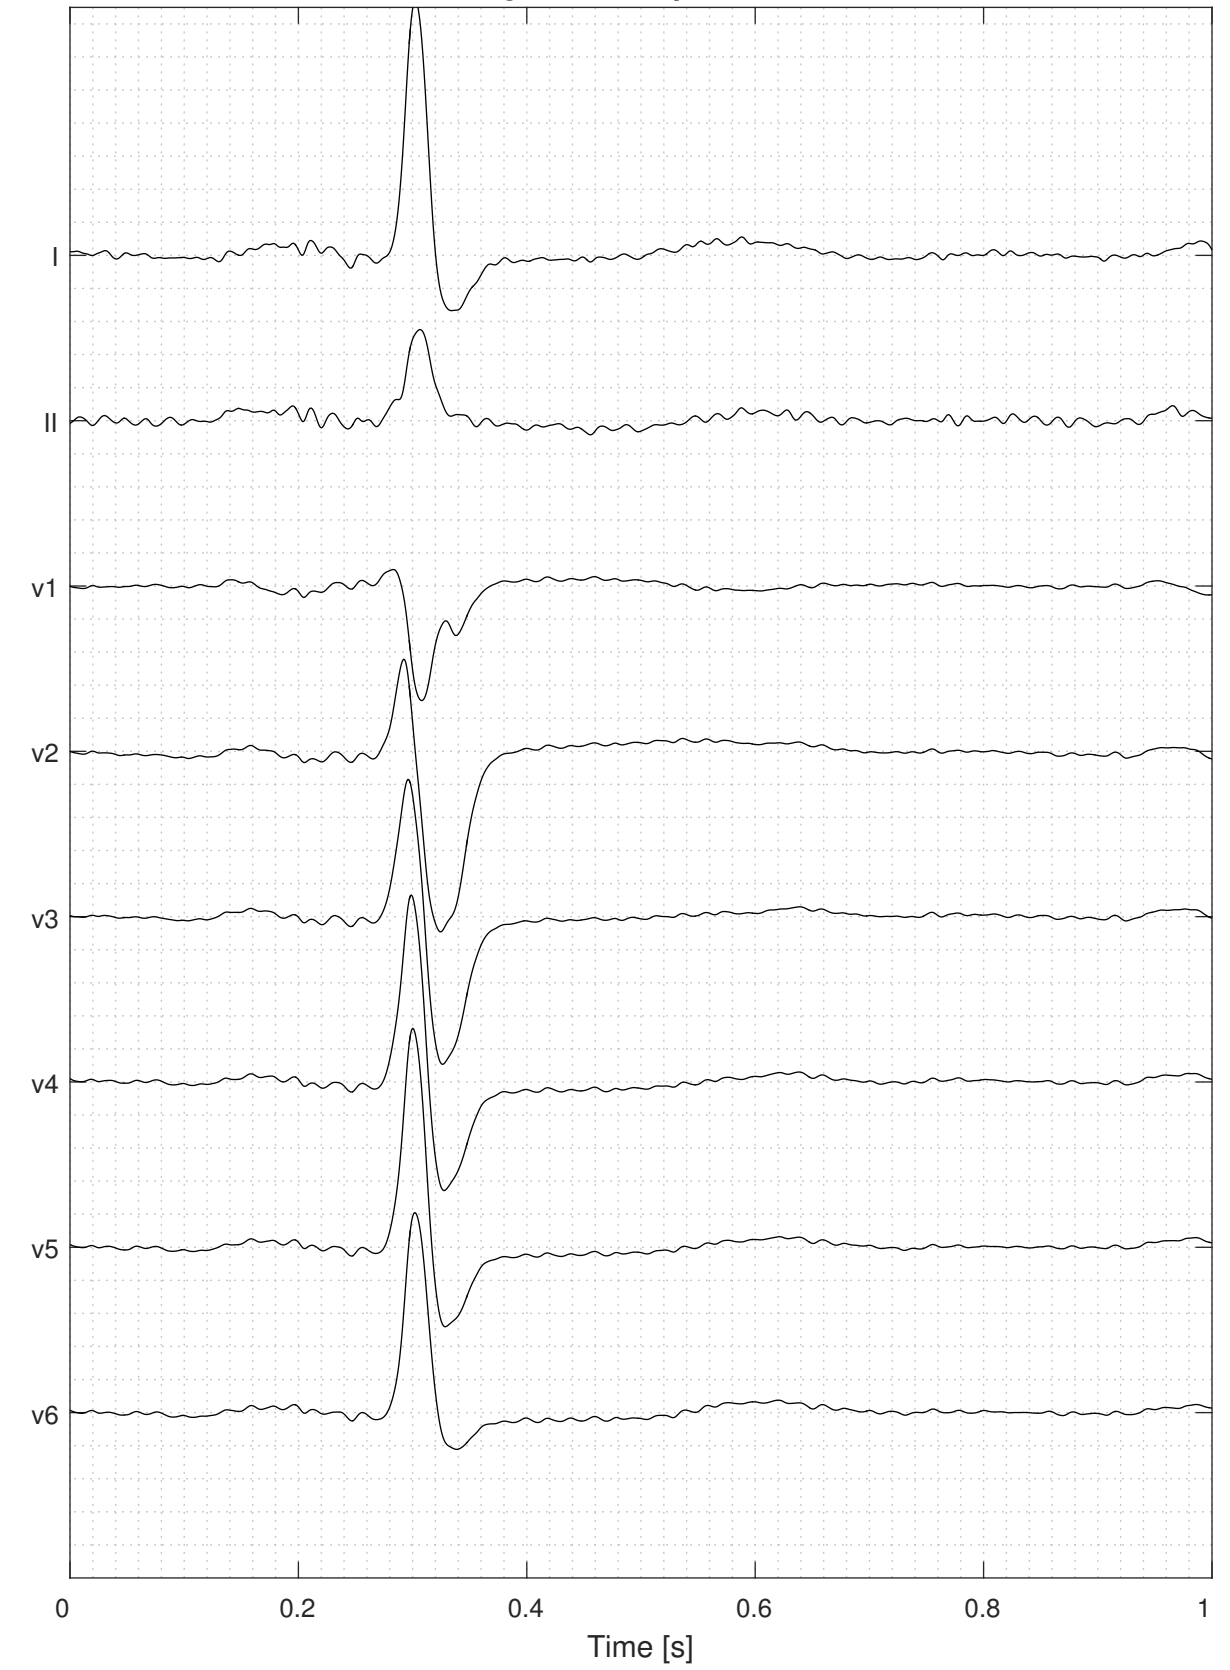

Patient 111

Low RR, Complex #: 103

Mid RR, Complex #: 78

High RR, Complex #: 2

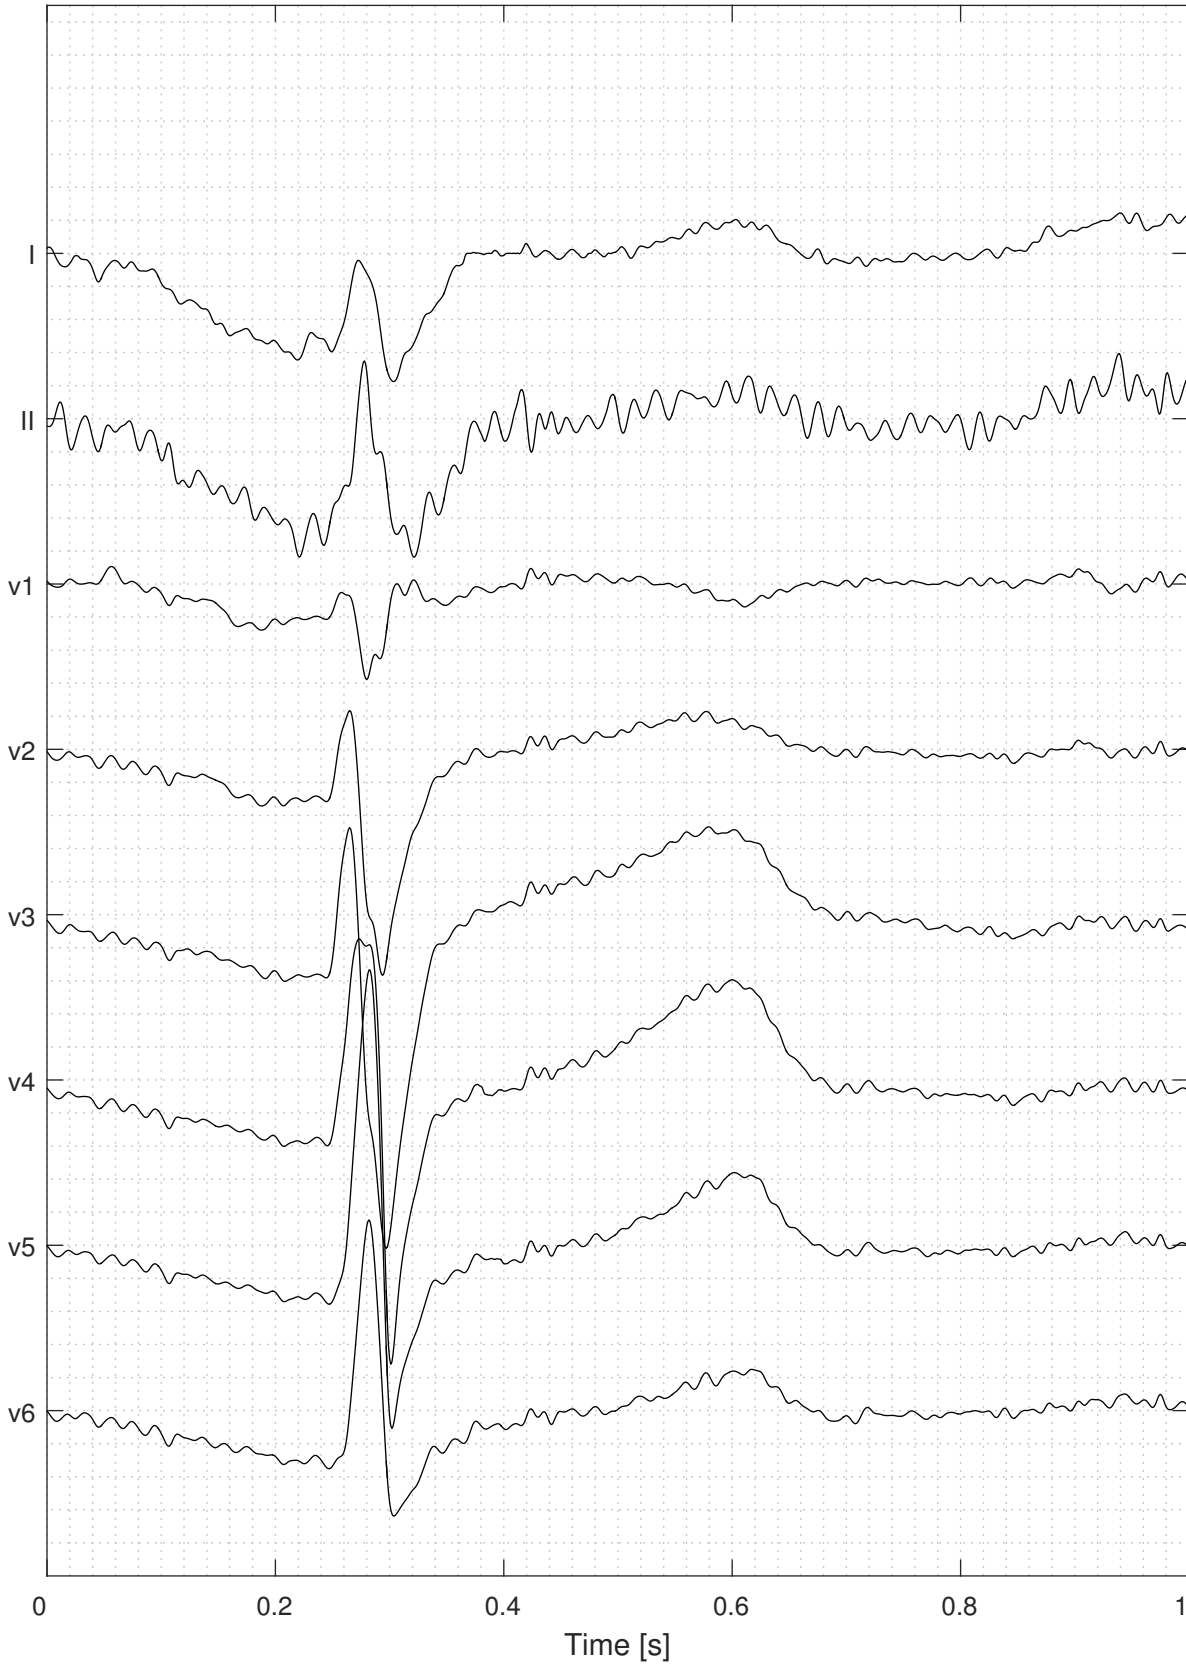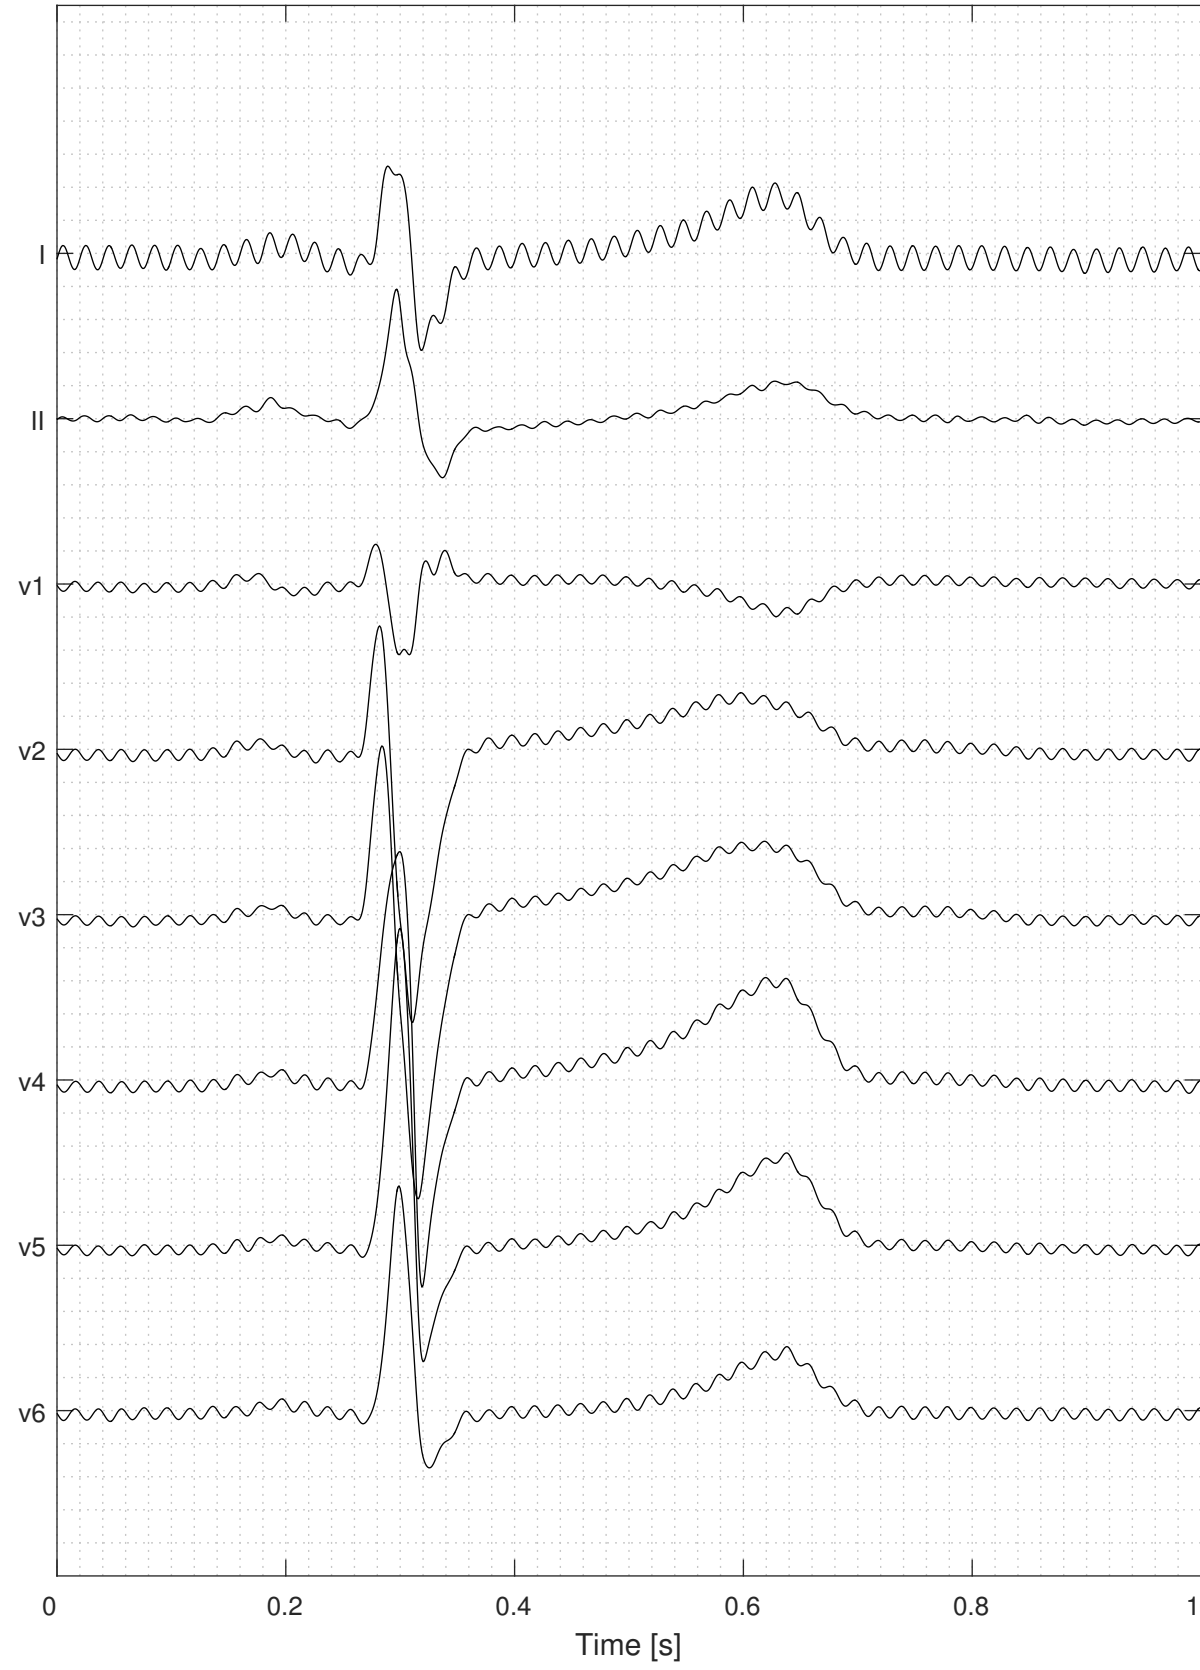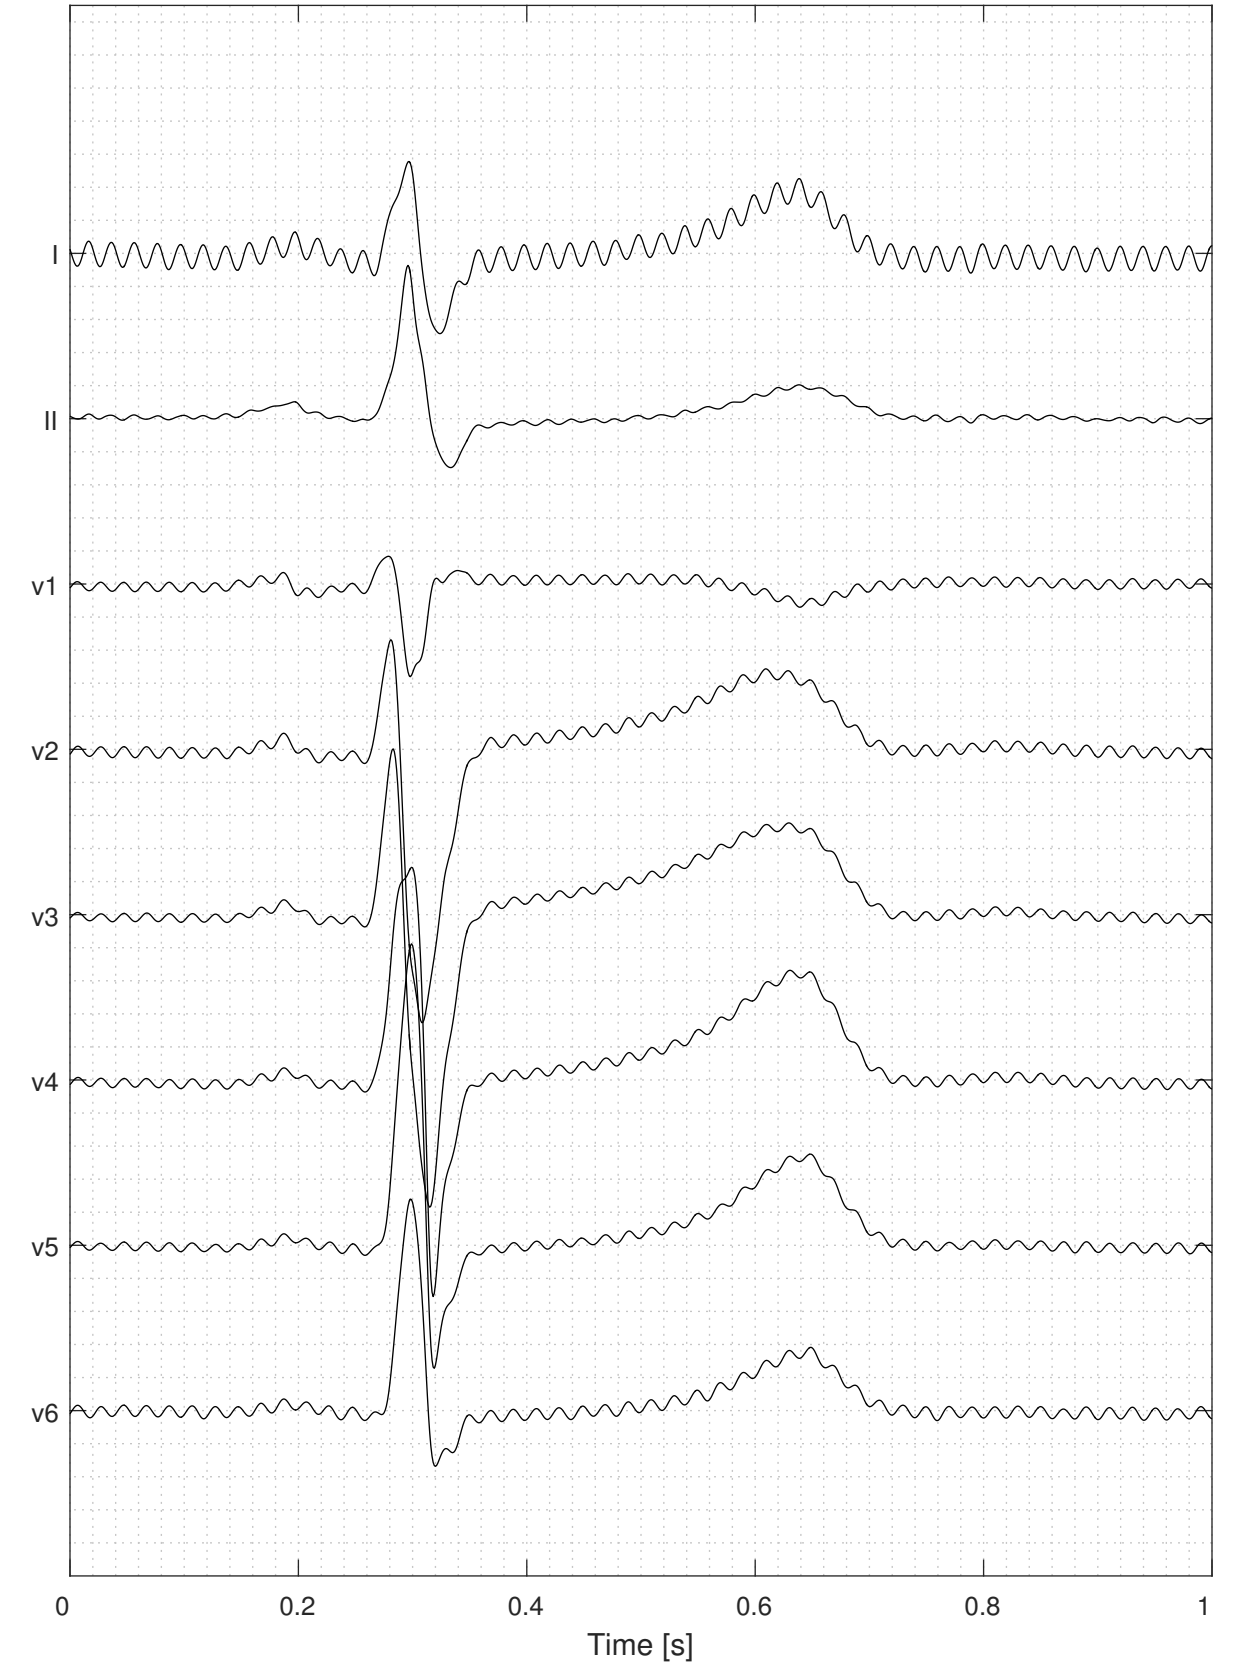

Patient 112

Low RR, Complex #: 308

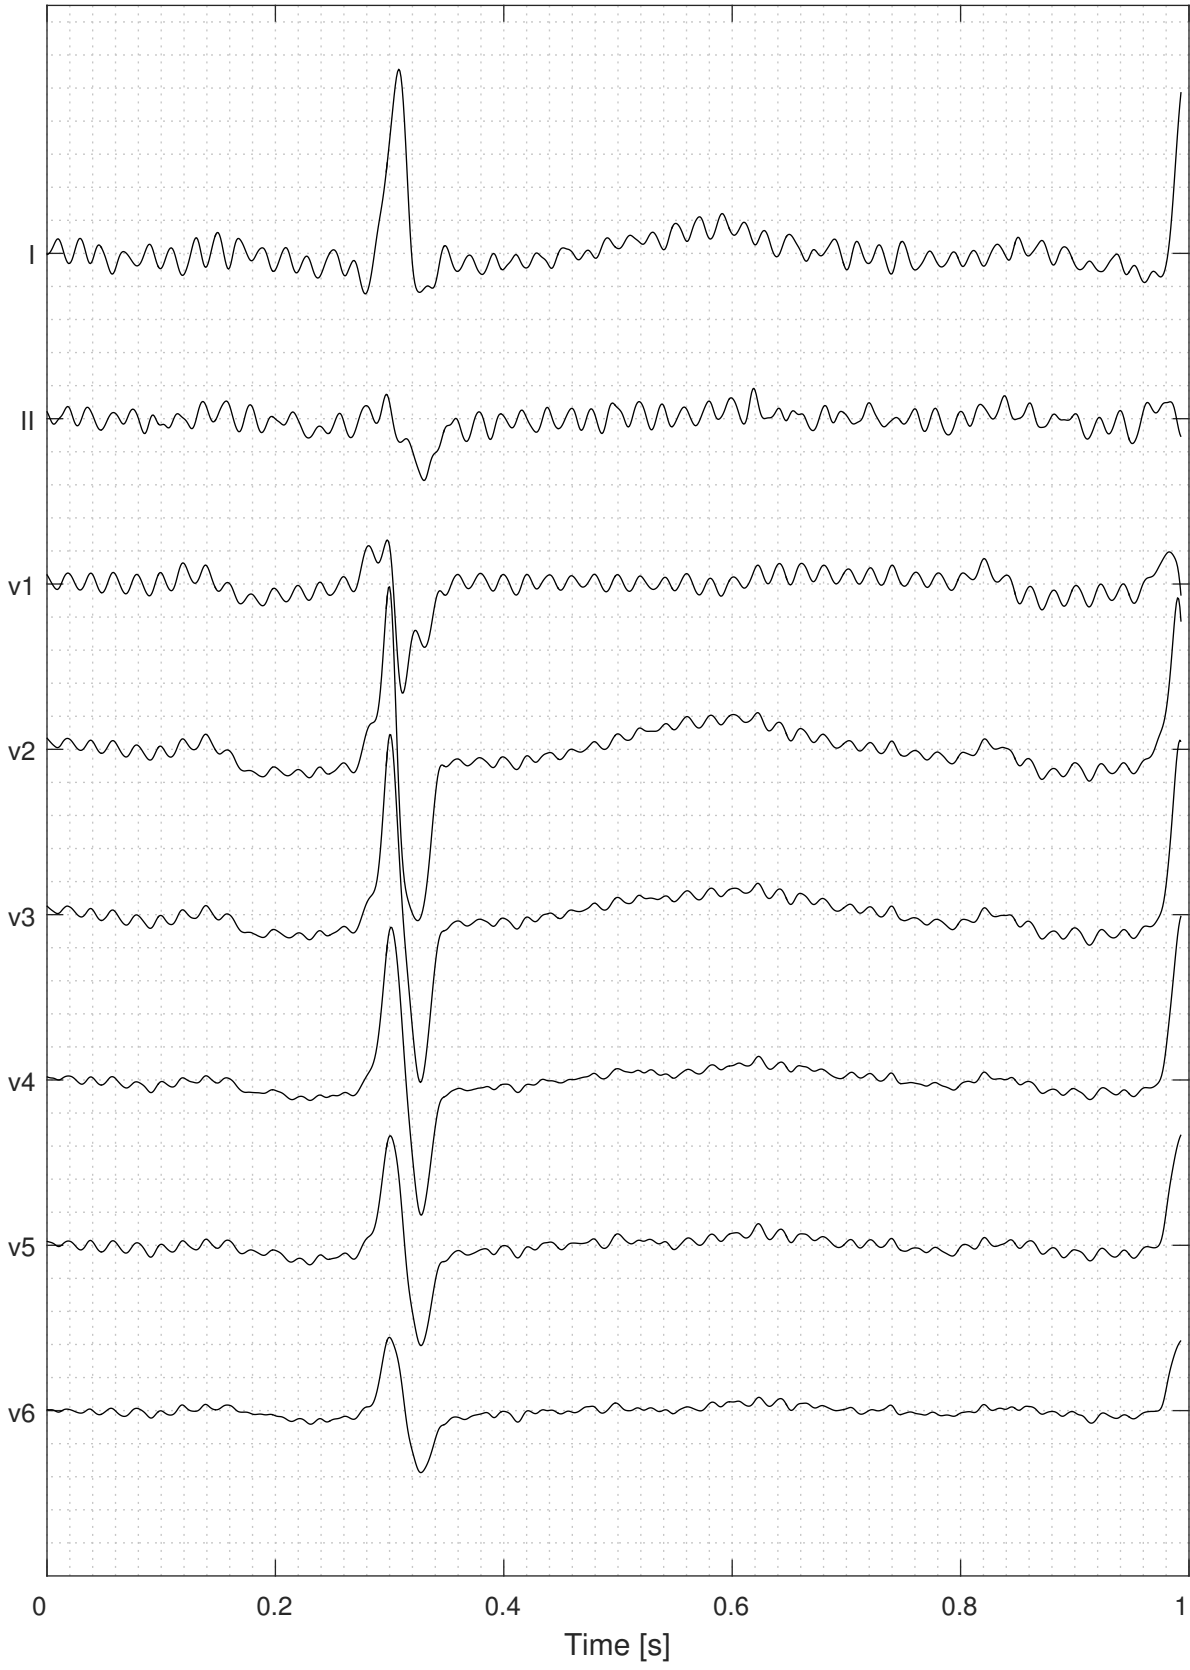

Mid RR, Complex #: 258

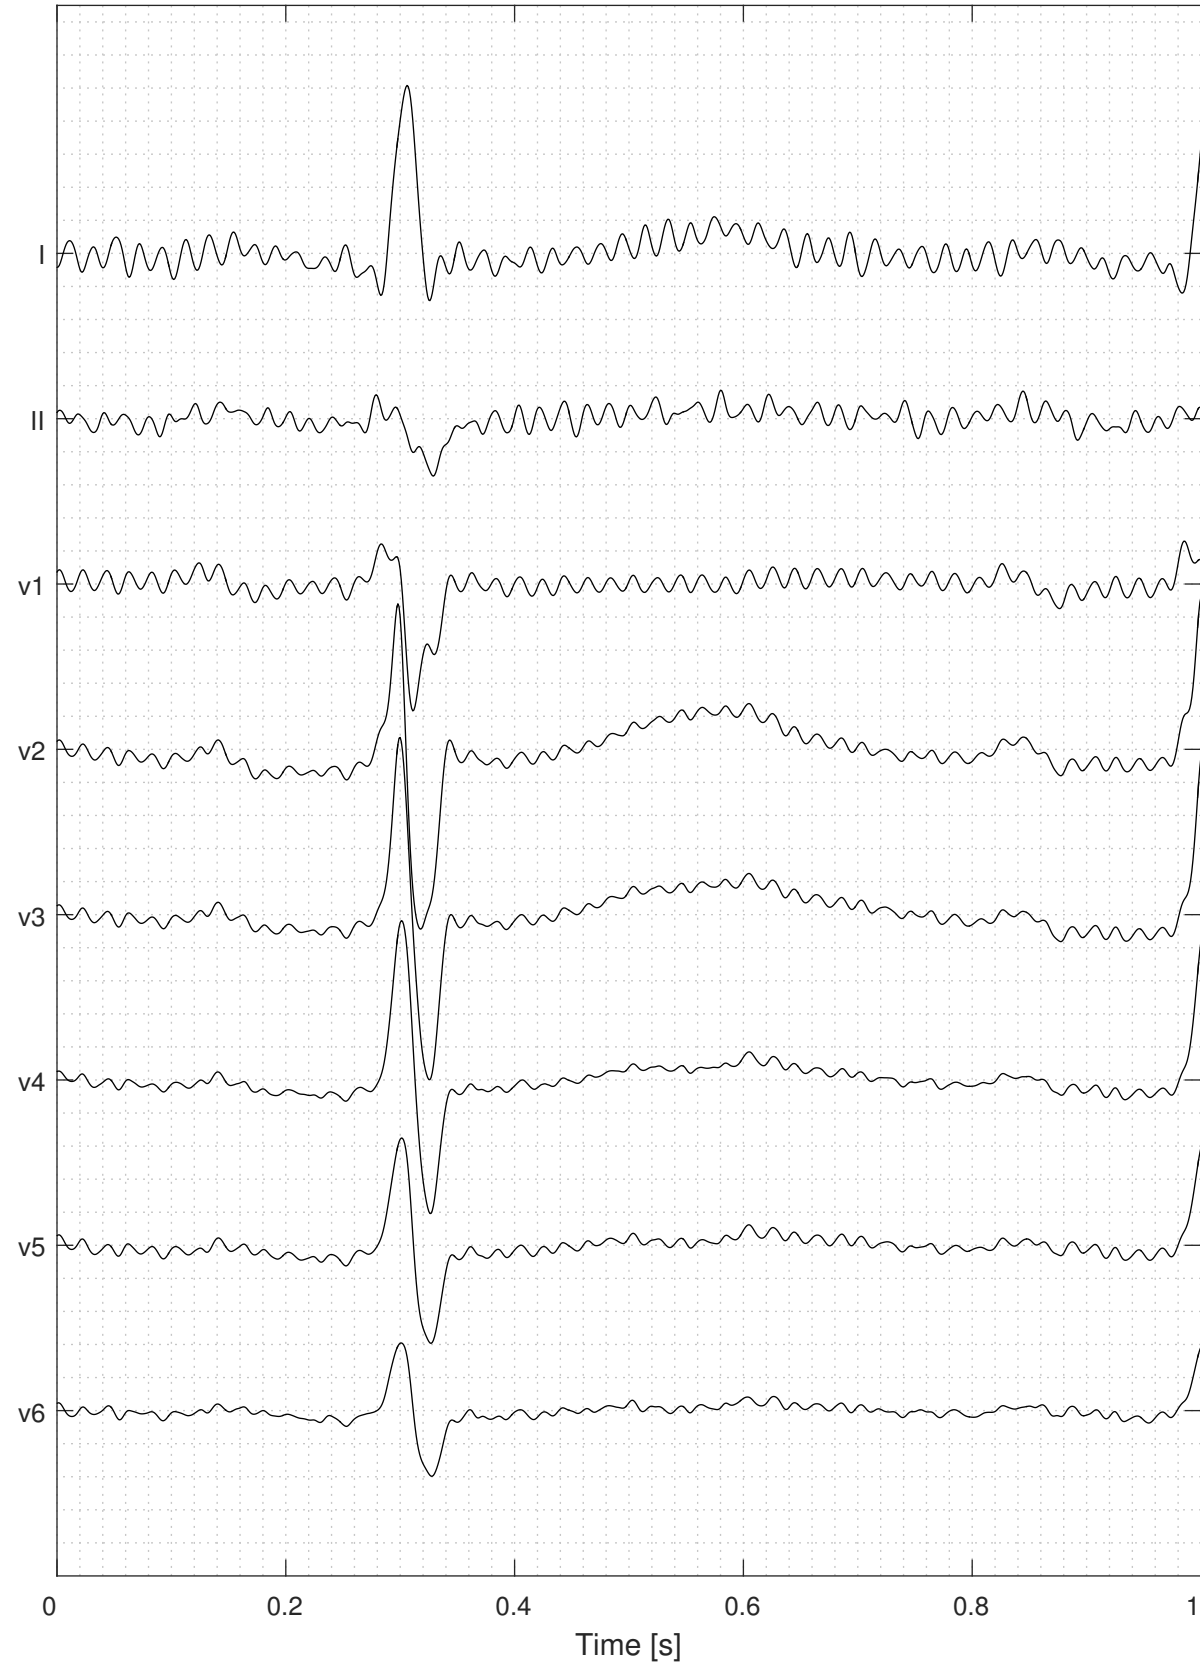

High RR, Complex #: 100

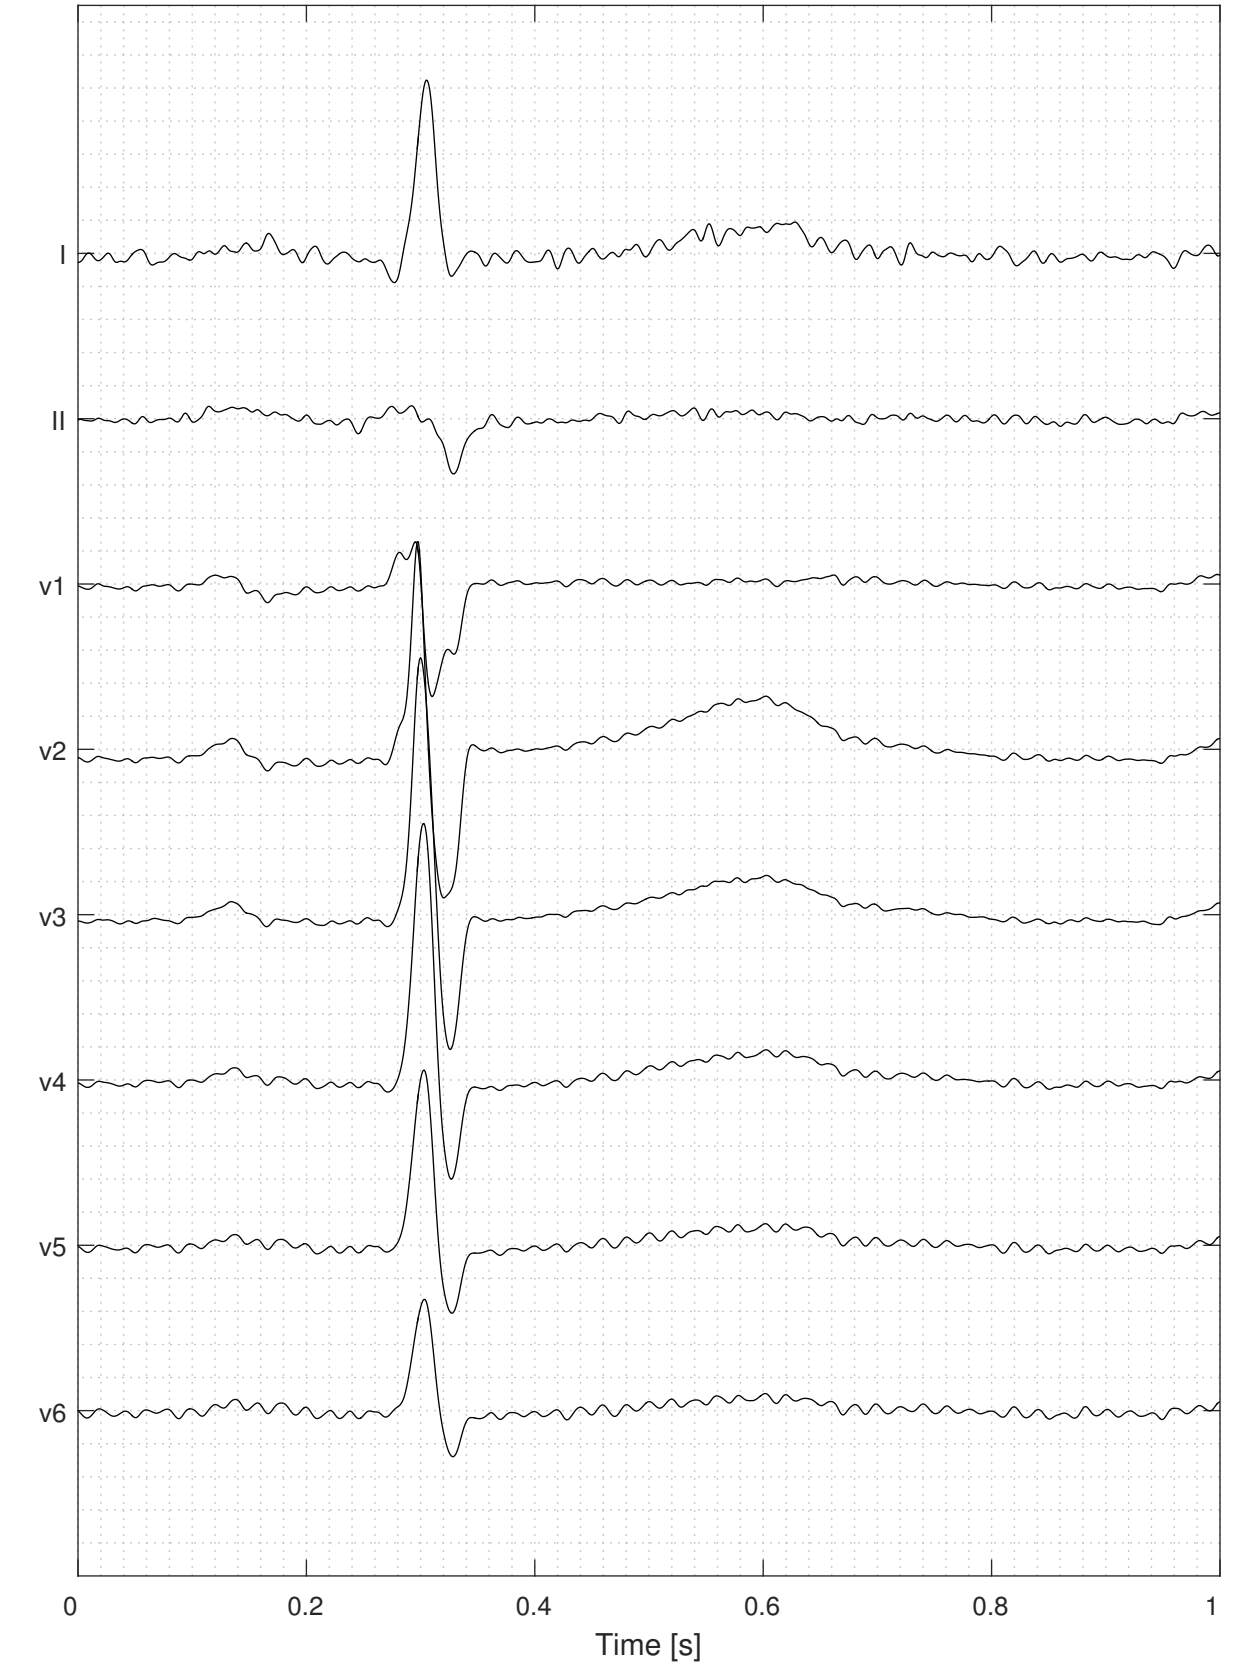



Patient 113

Low RR, Complex #: 134

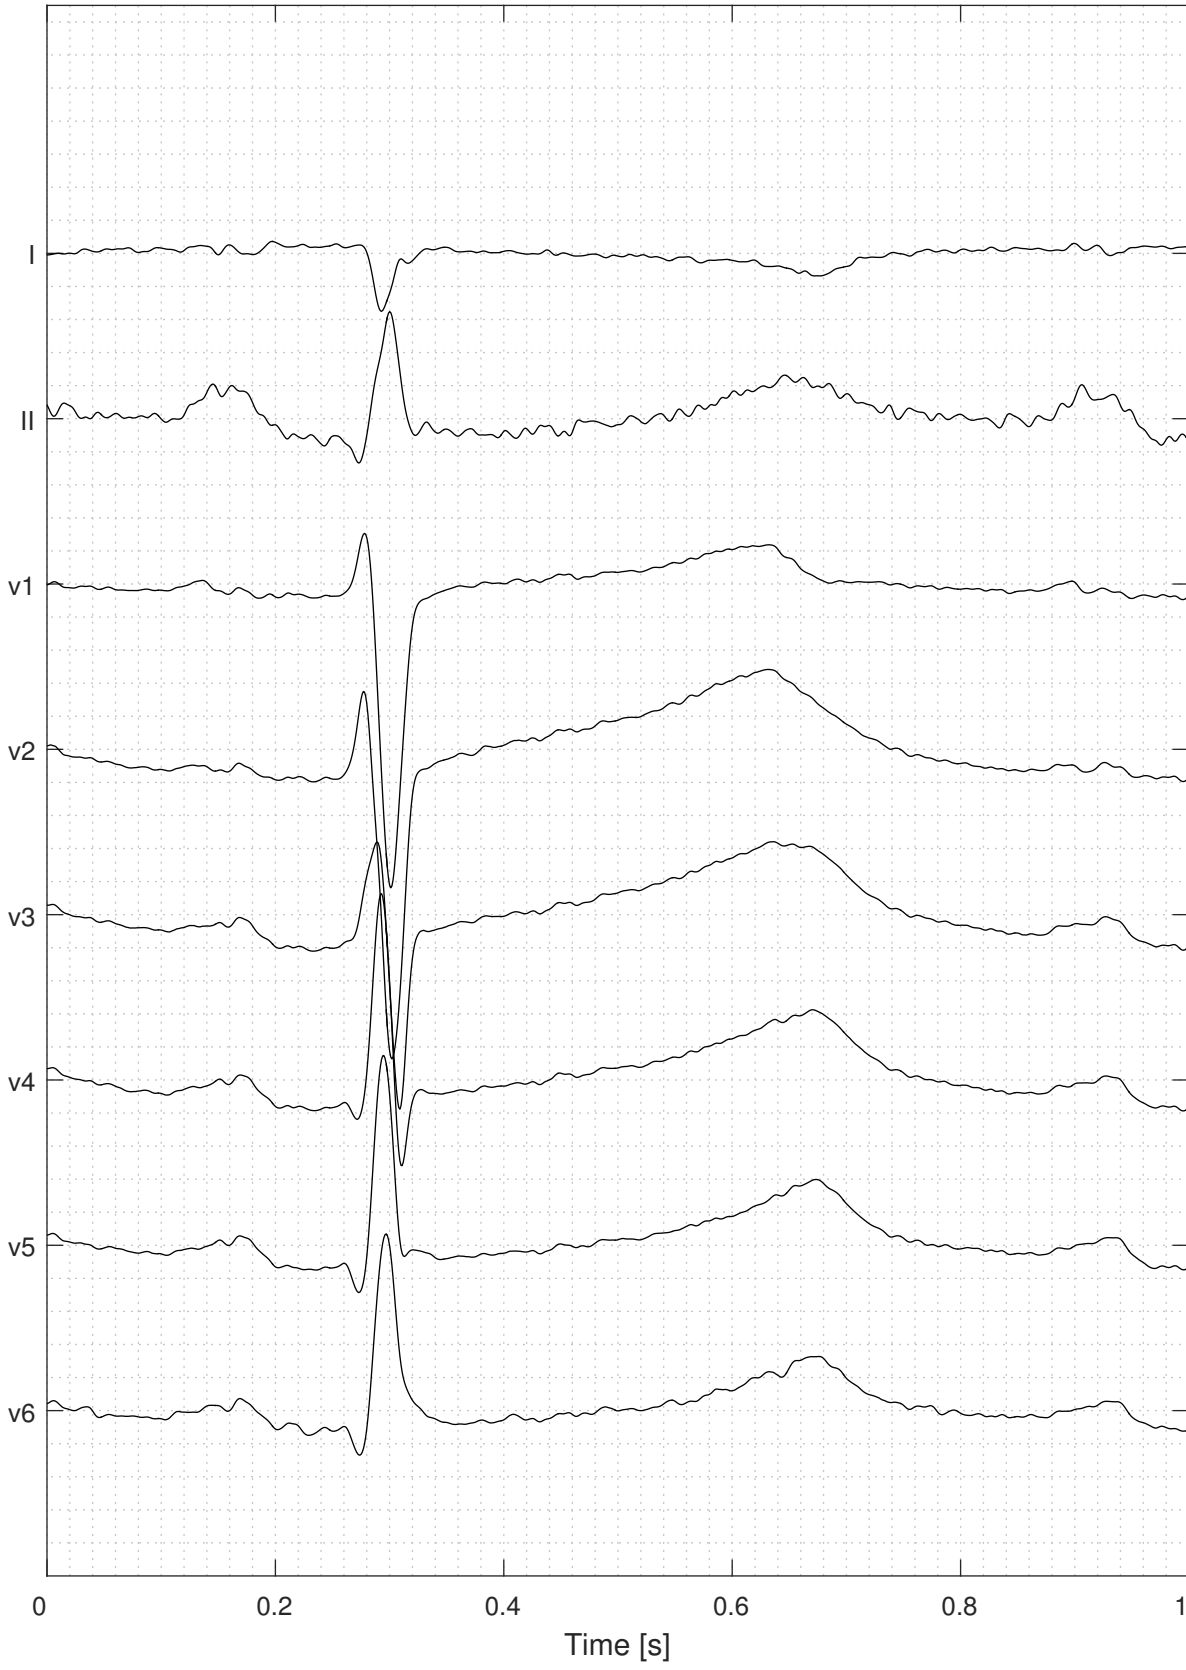

Mid RR, Complex #: 285

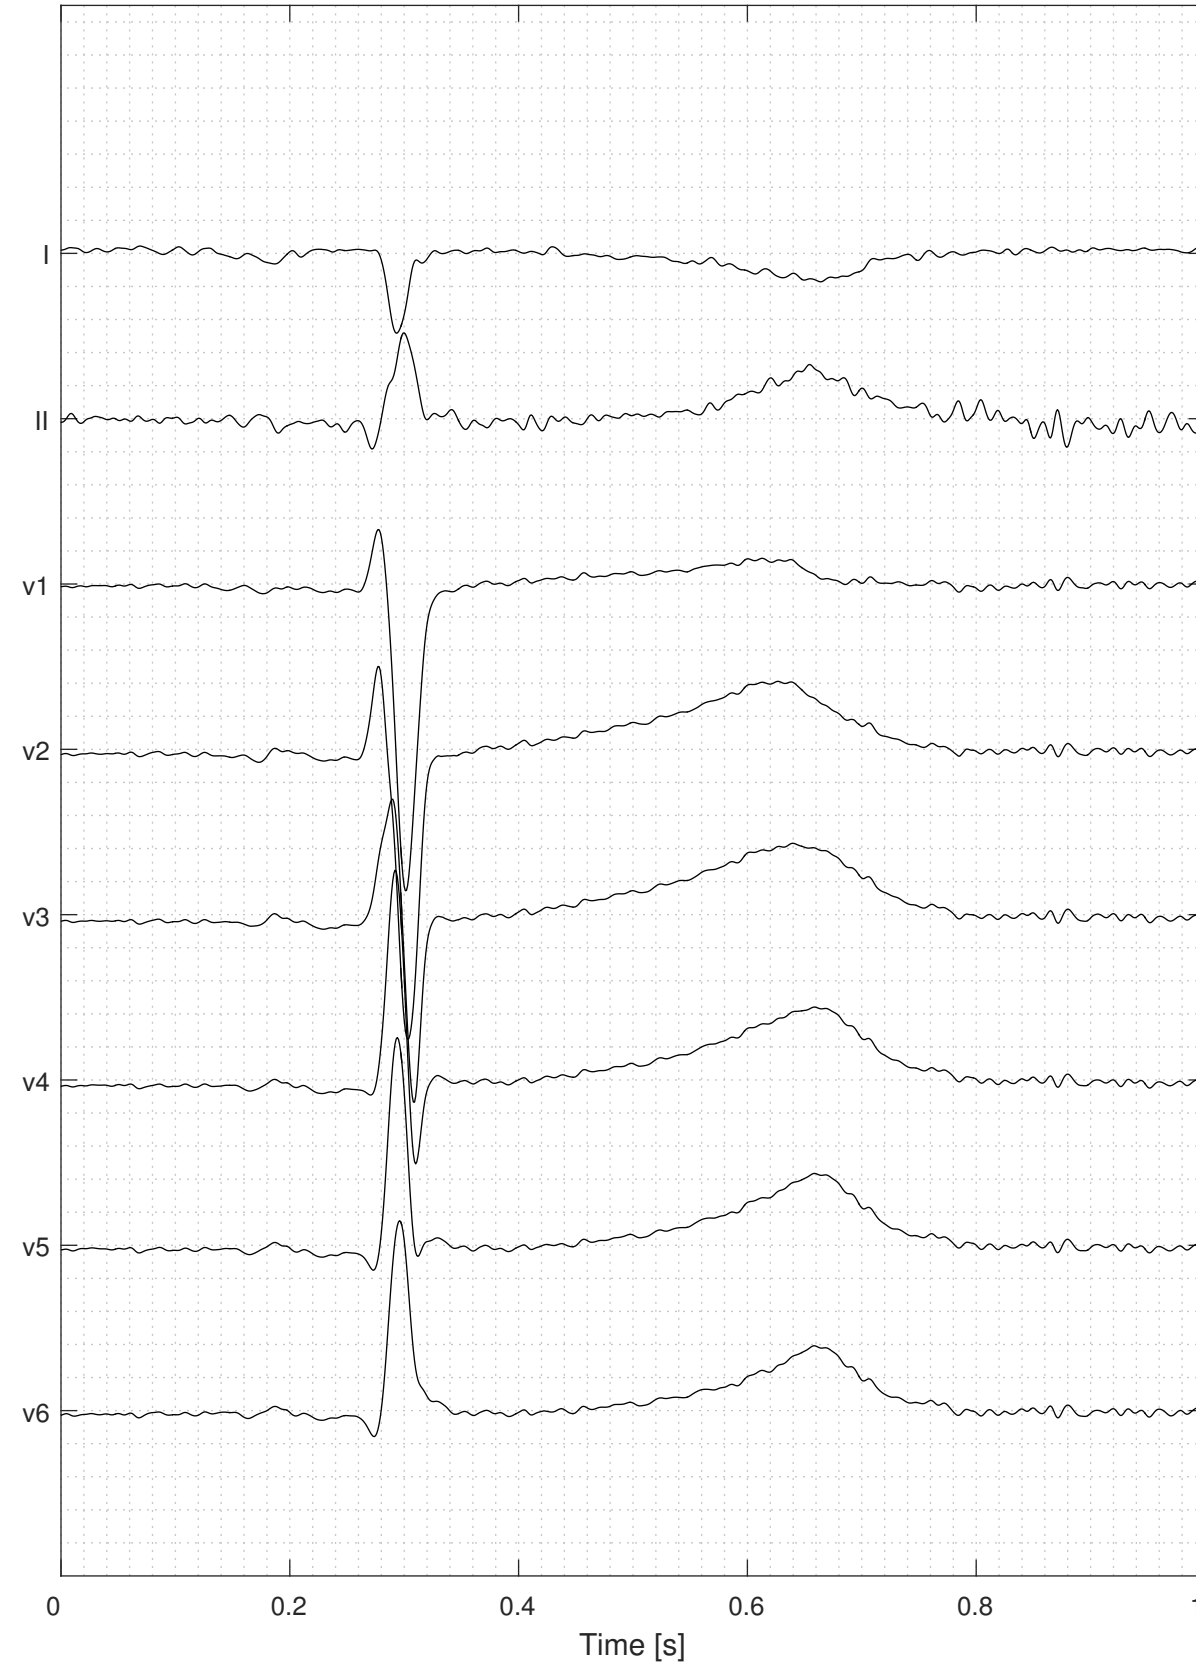

High RR, Complex #: 43

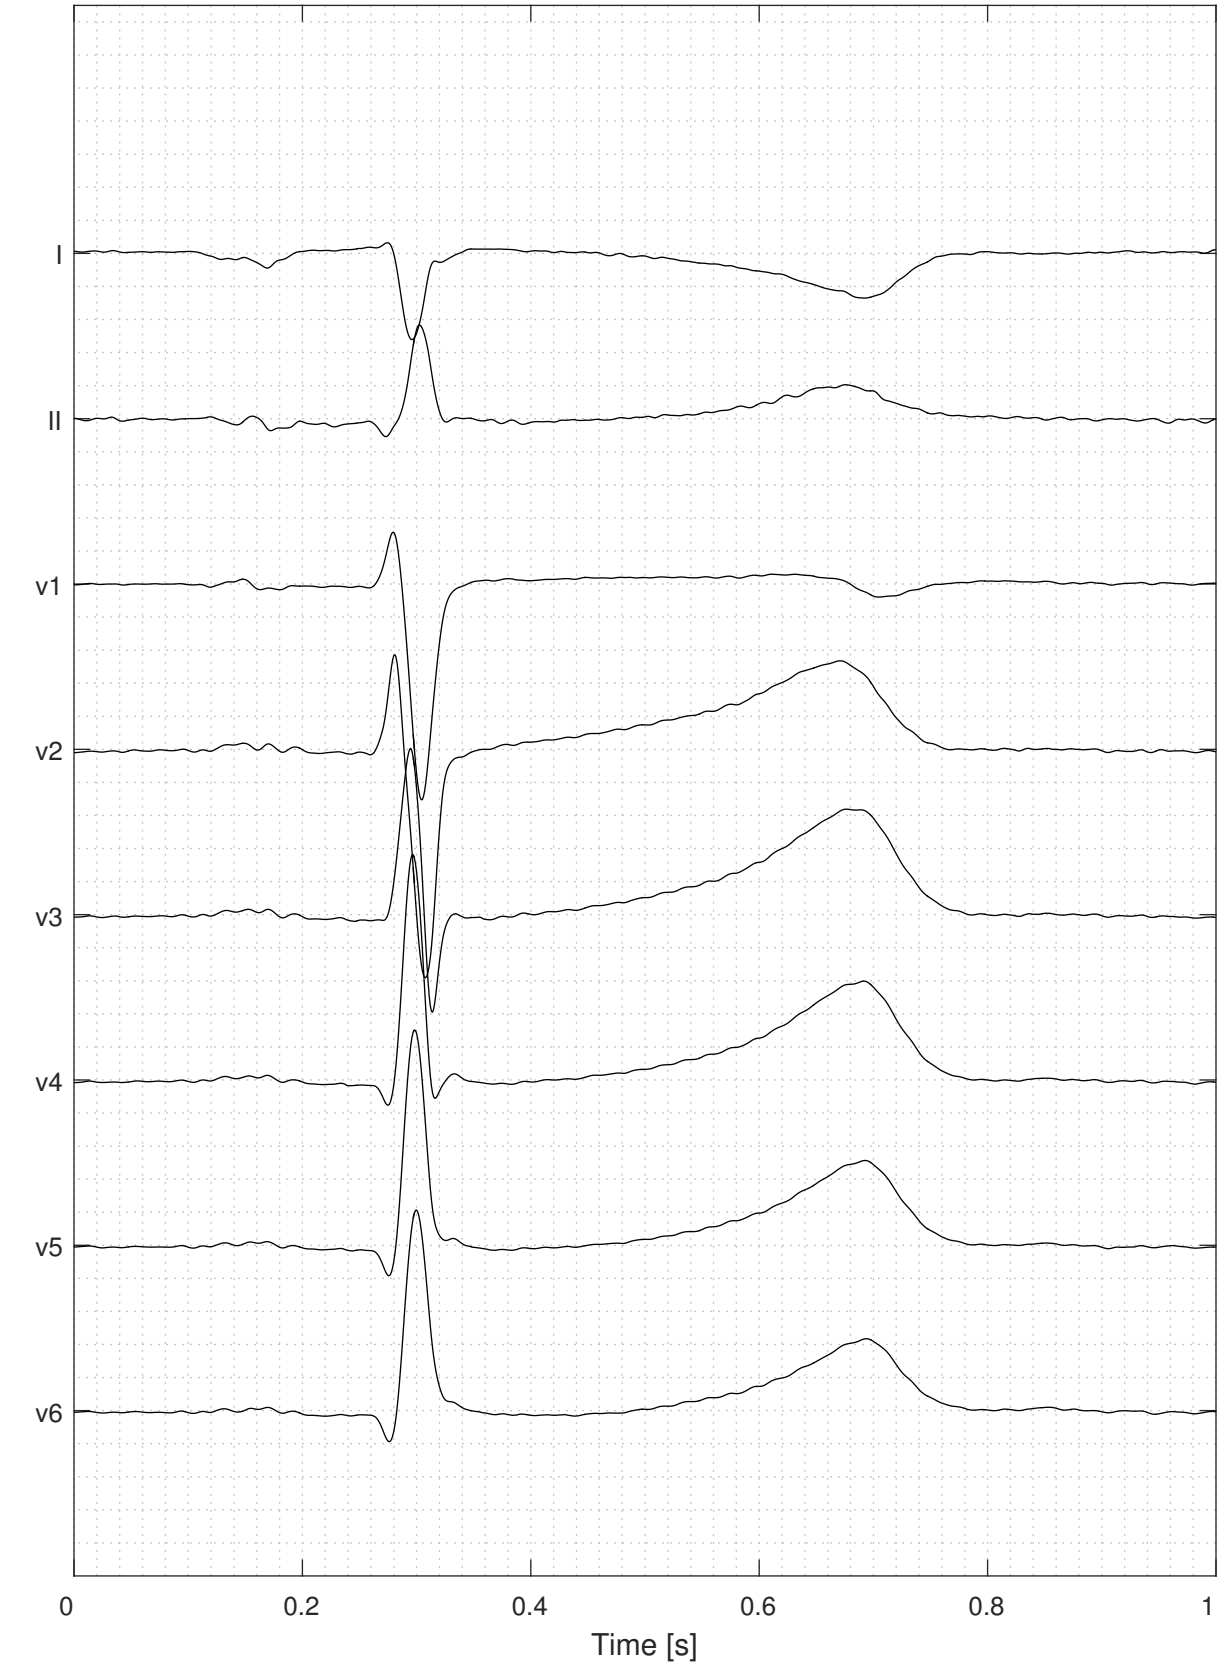

Patient 114

Low RR, Complex #: 190

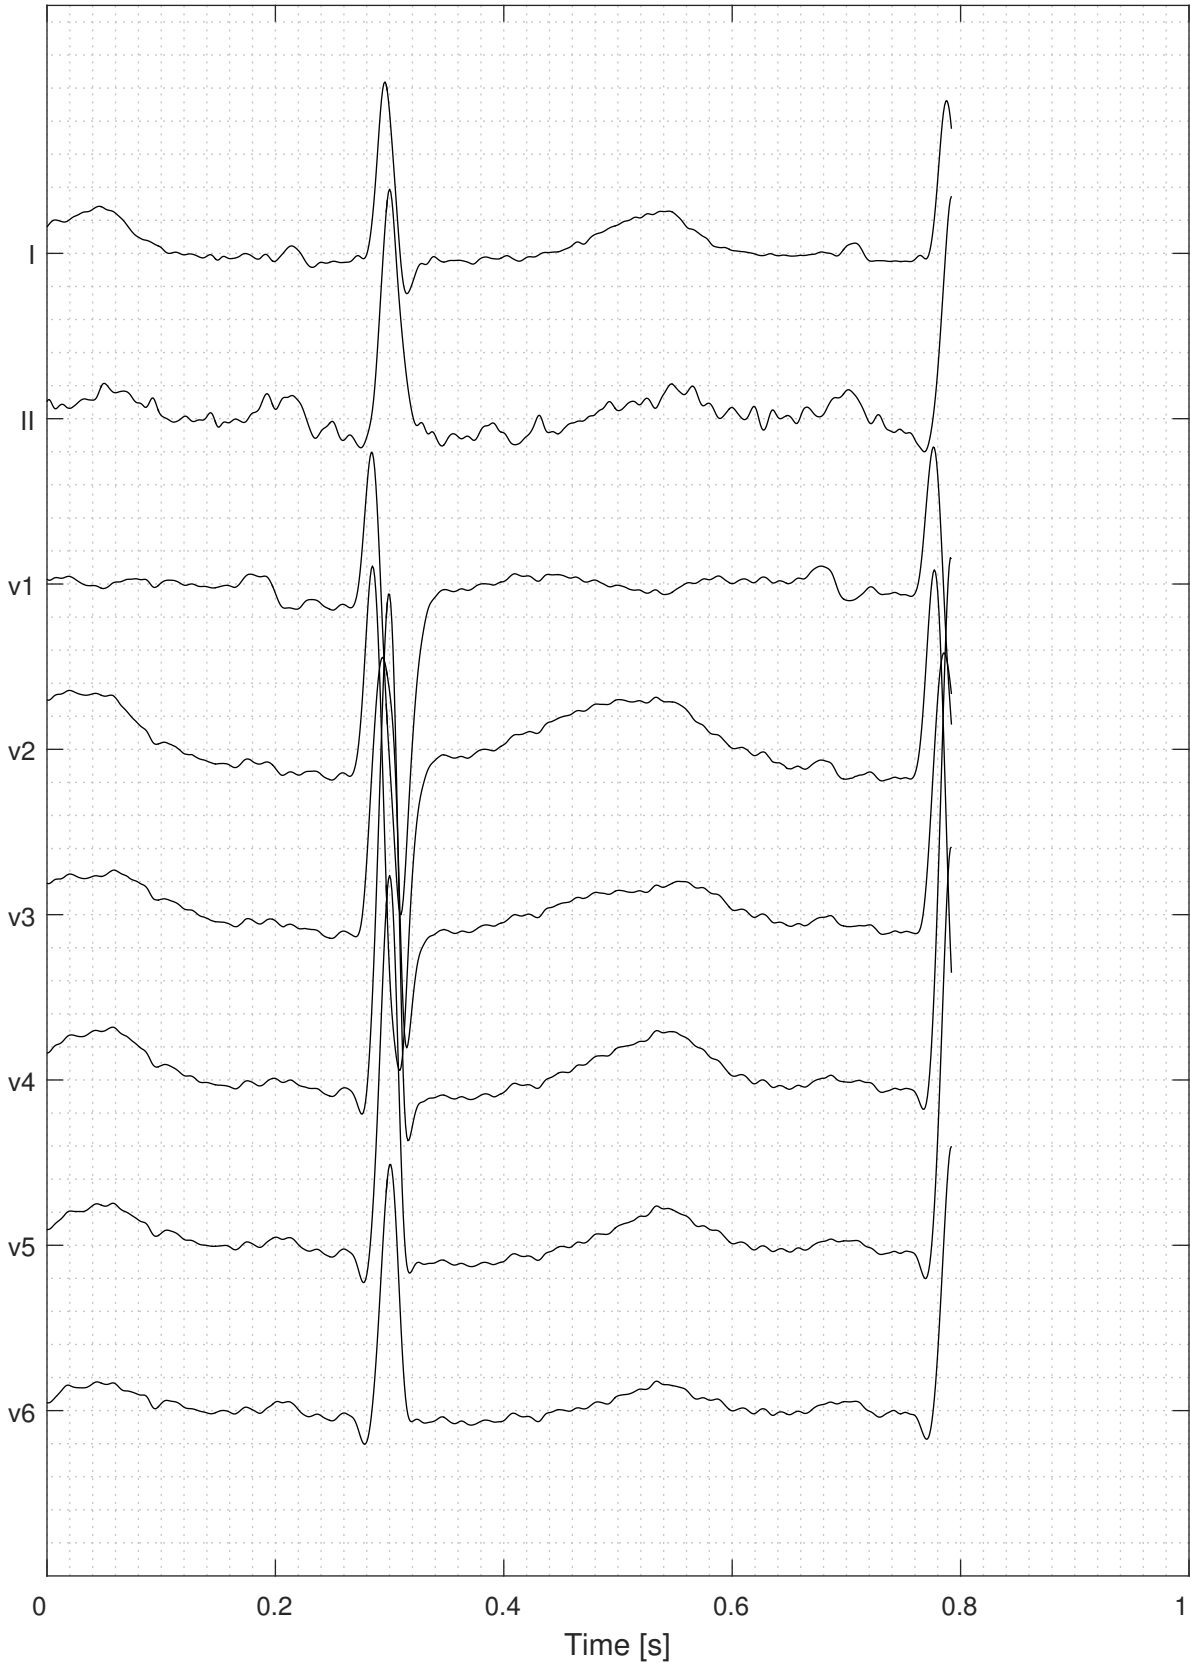

Mid RR, Complex #: 220

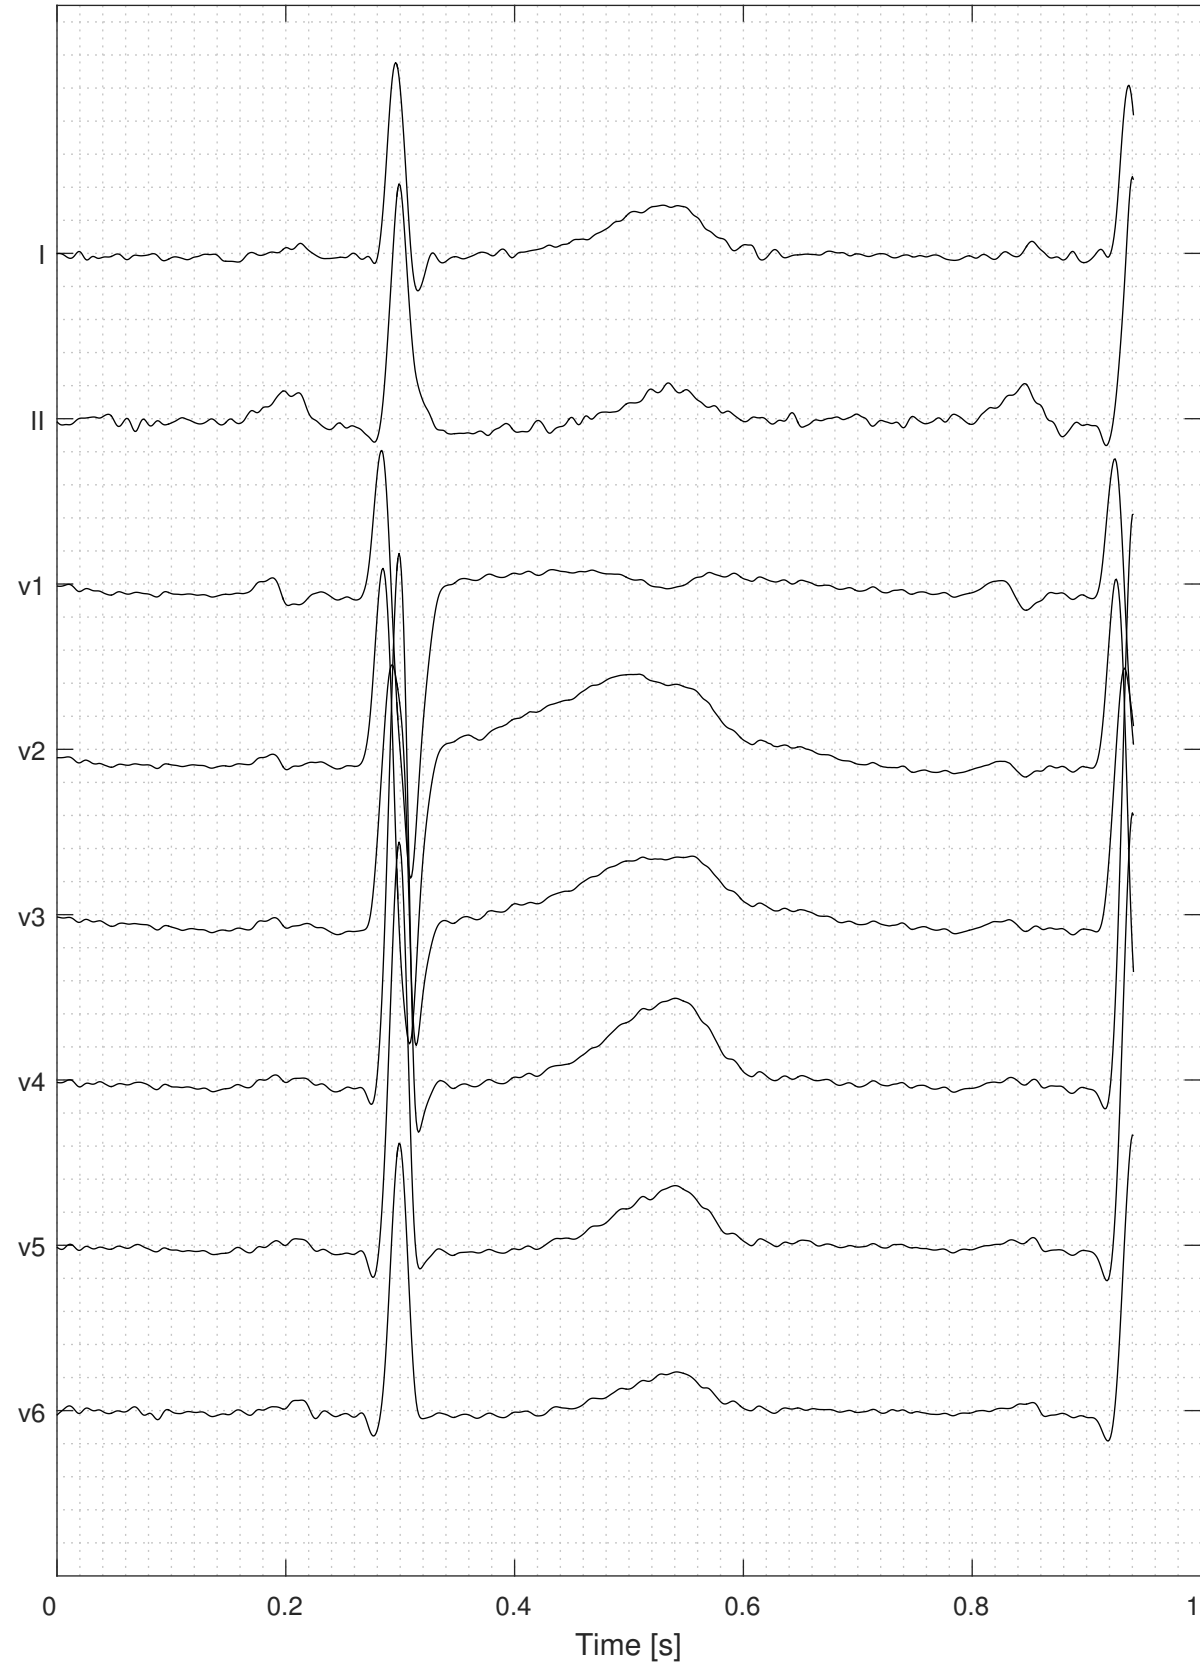

High RR, Complex #: 87

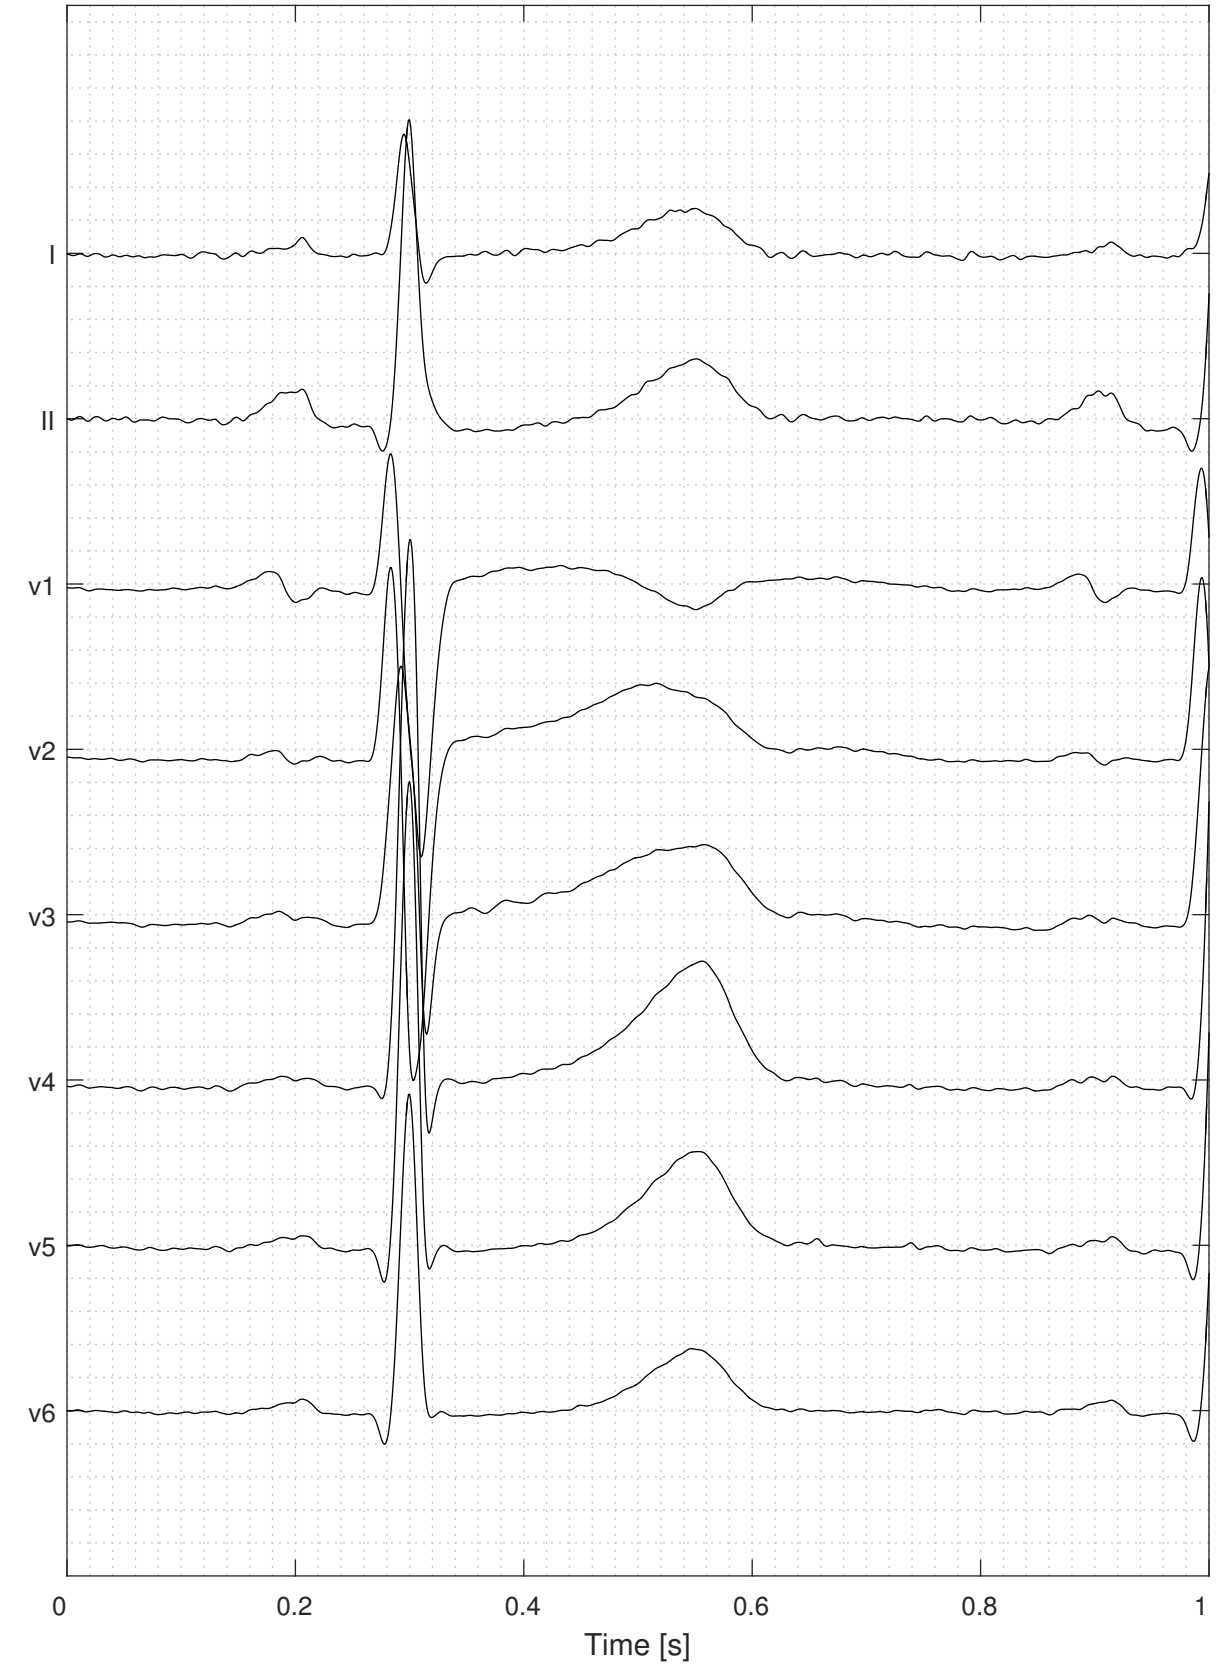

Patient 115

Low RR, Complex #: 414

Mid RR, Complex #: 85

High RR, Complex #: 62

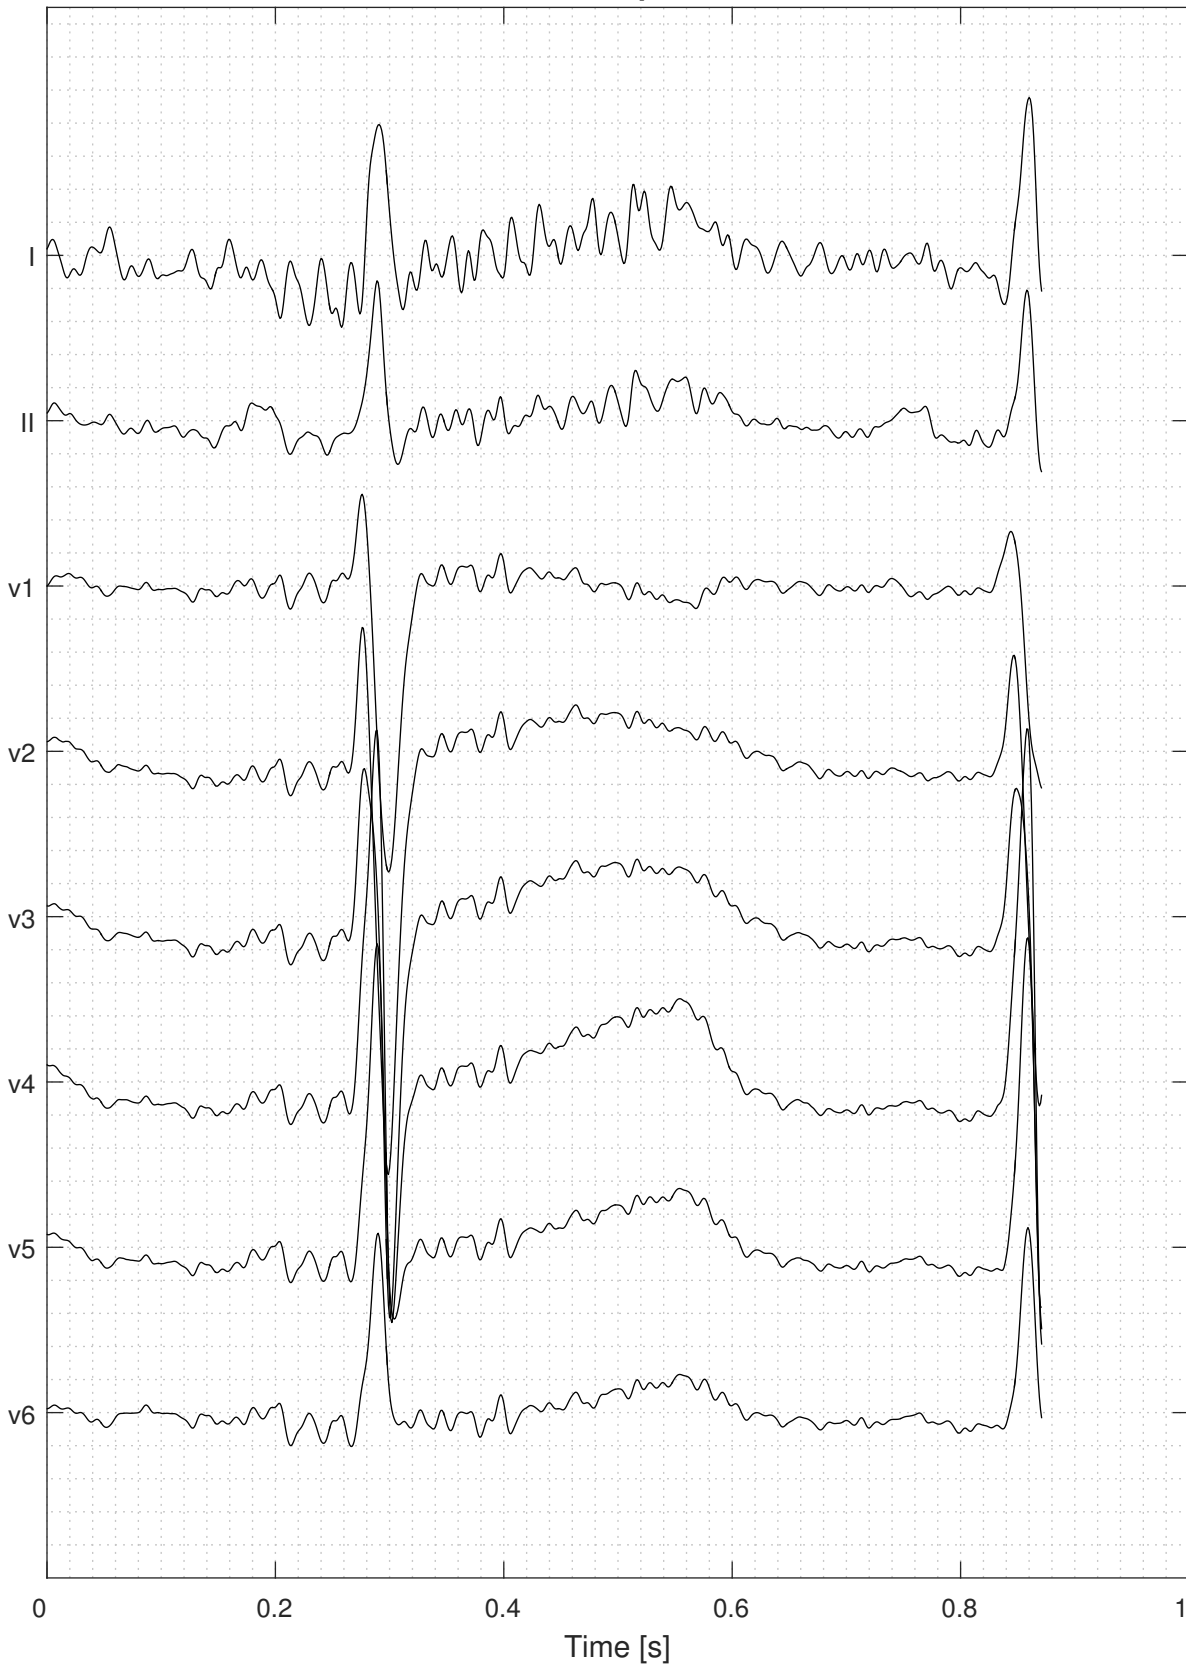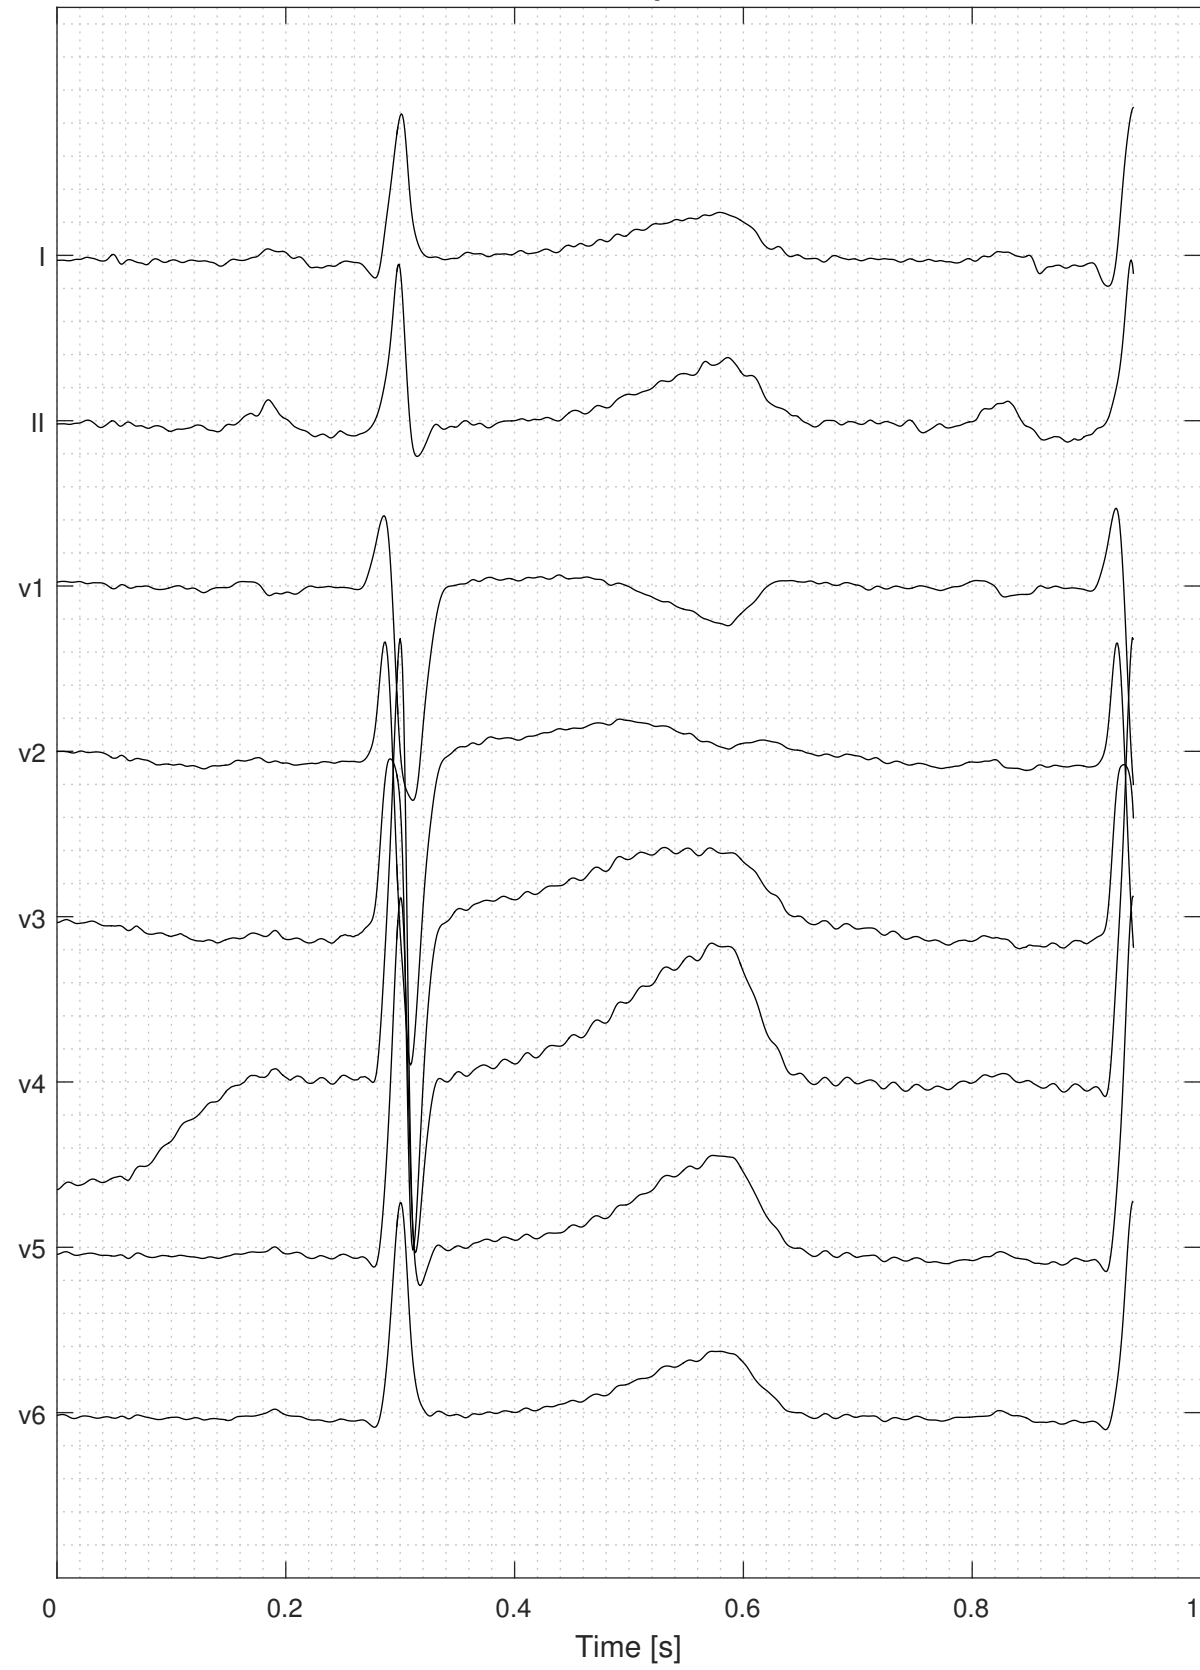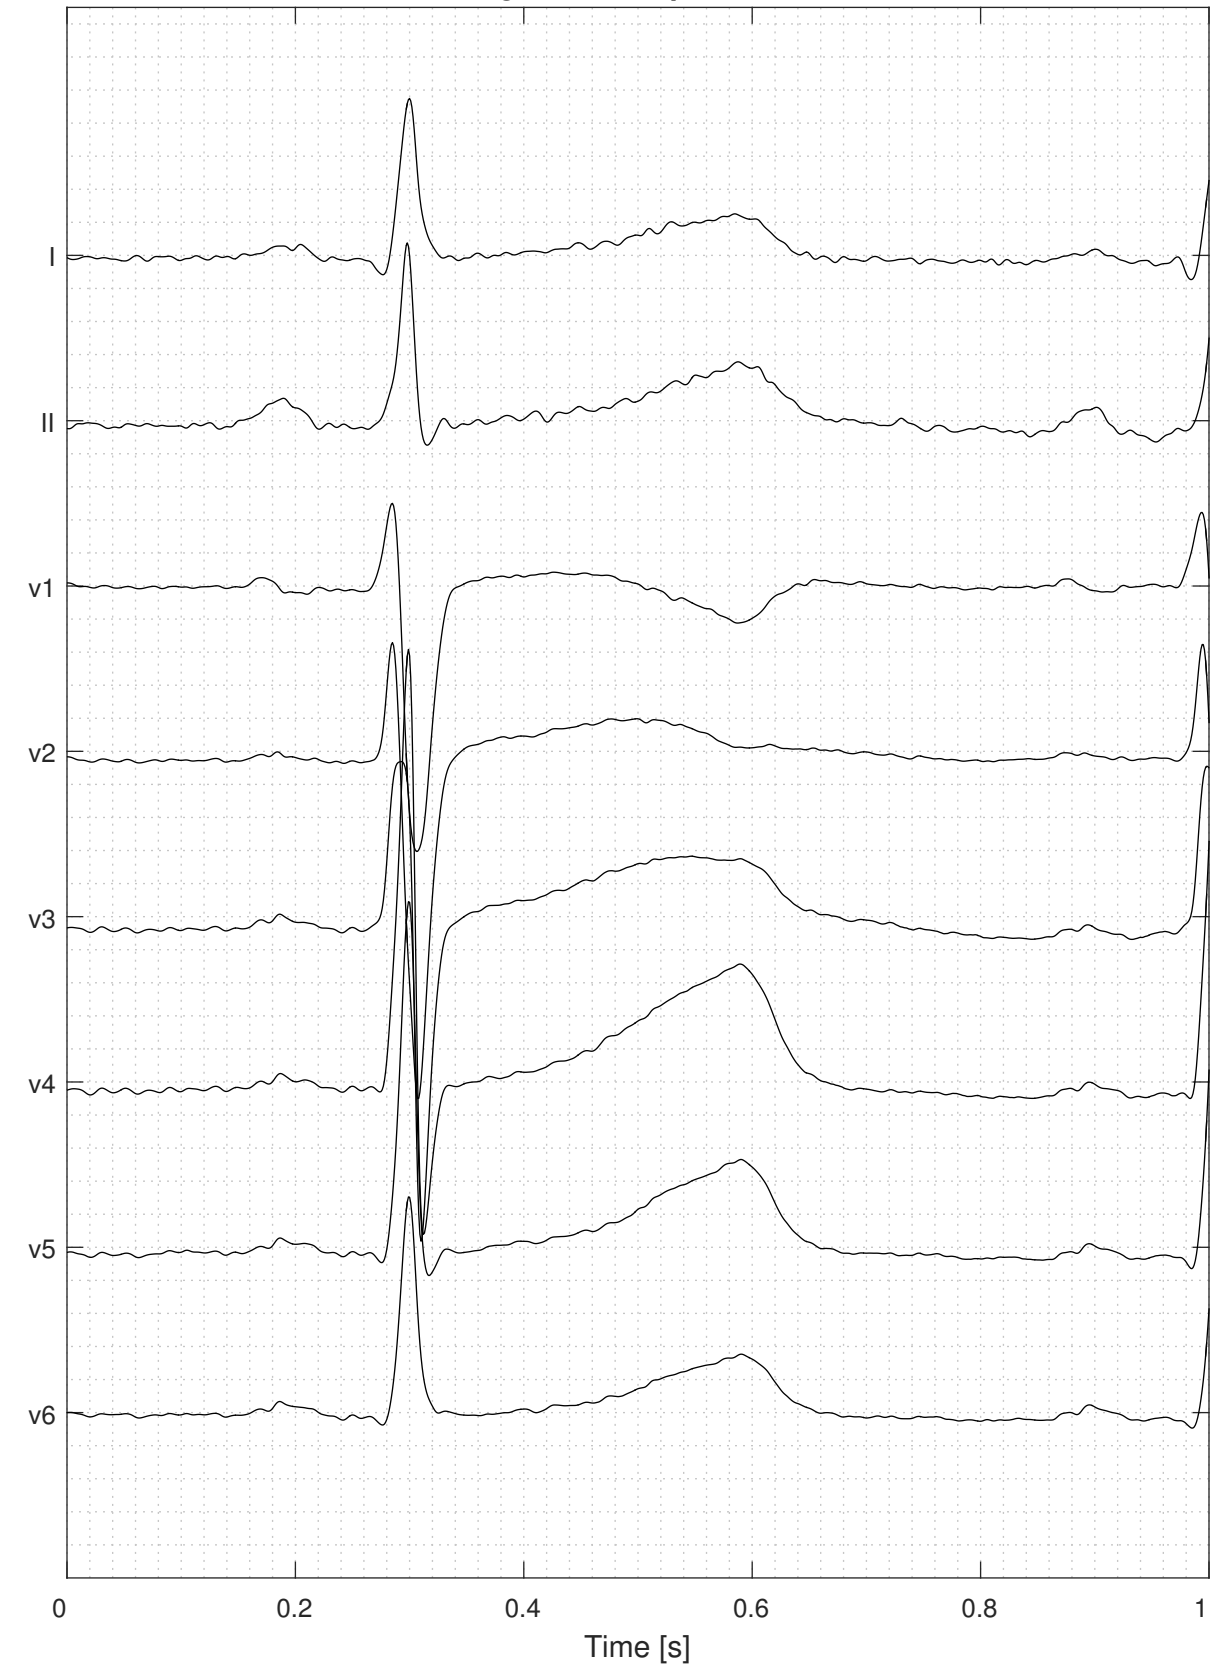

Patient 116

Low RR, Complex #: 257

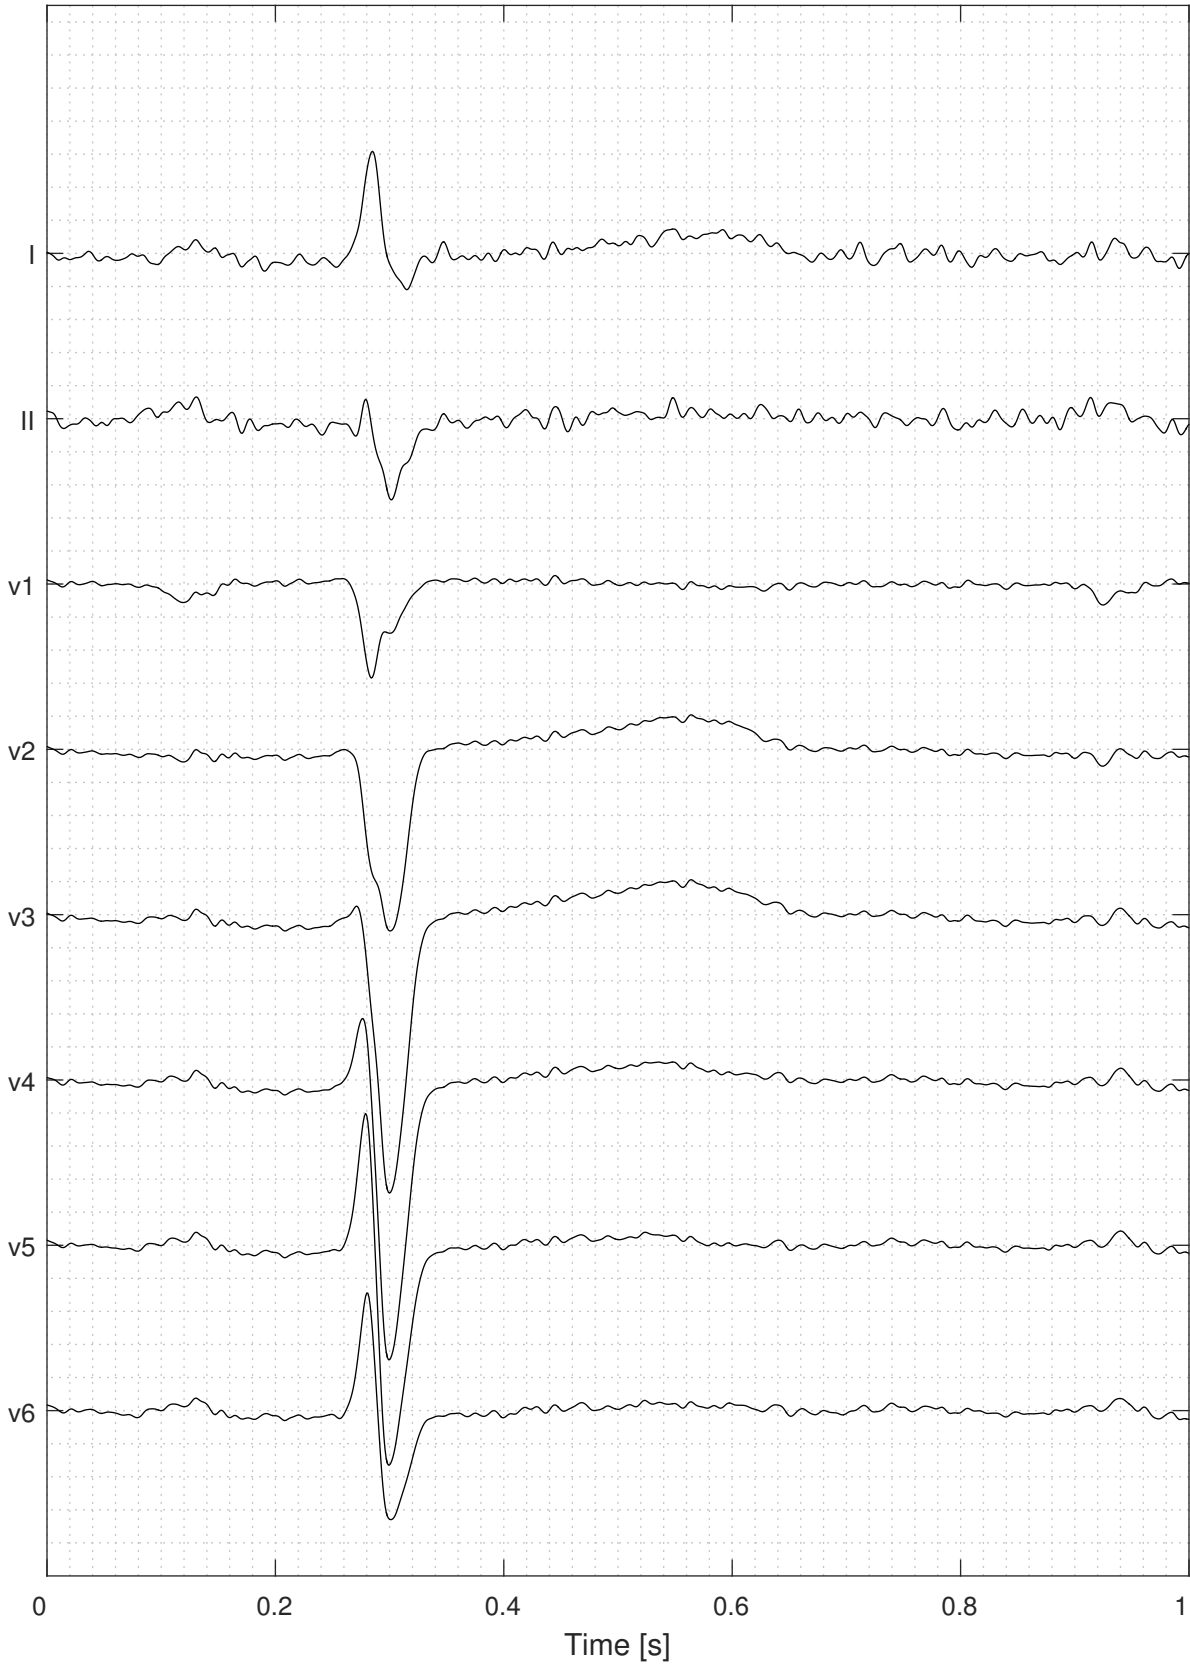

Mid RR, Complex #: 239

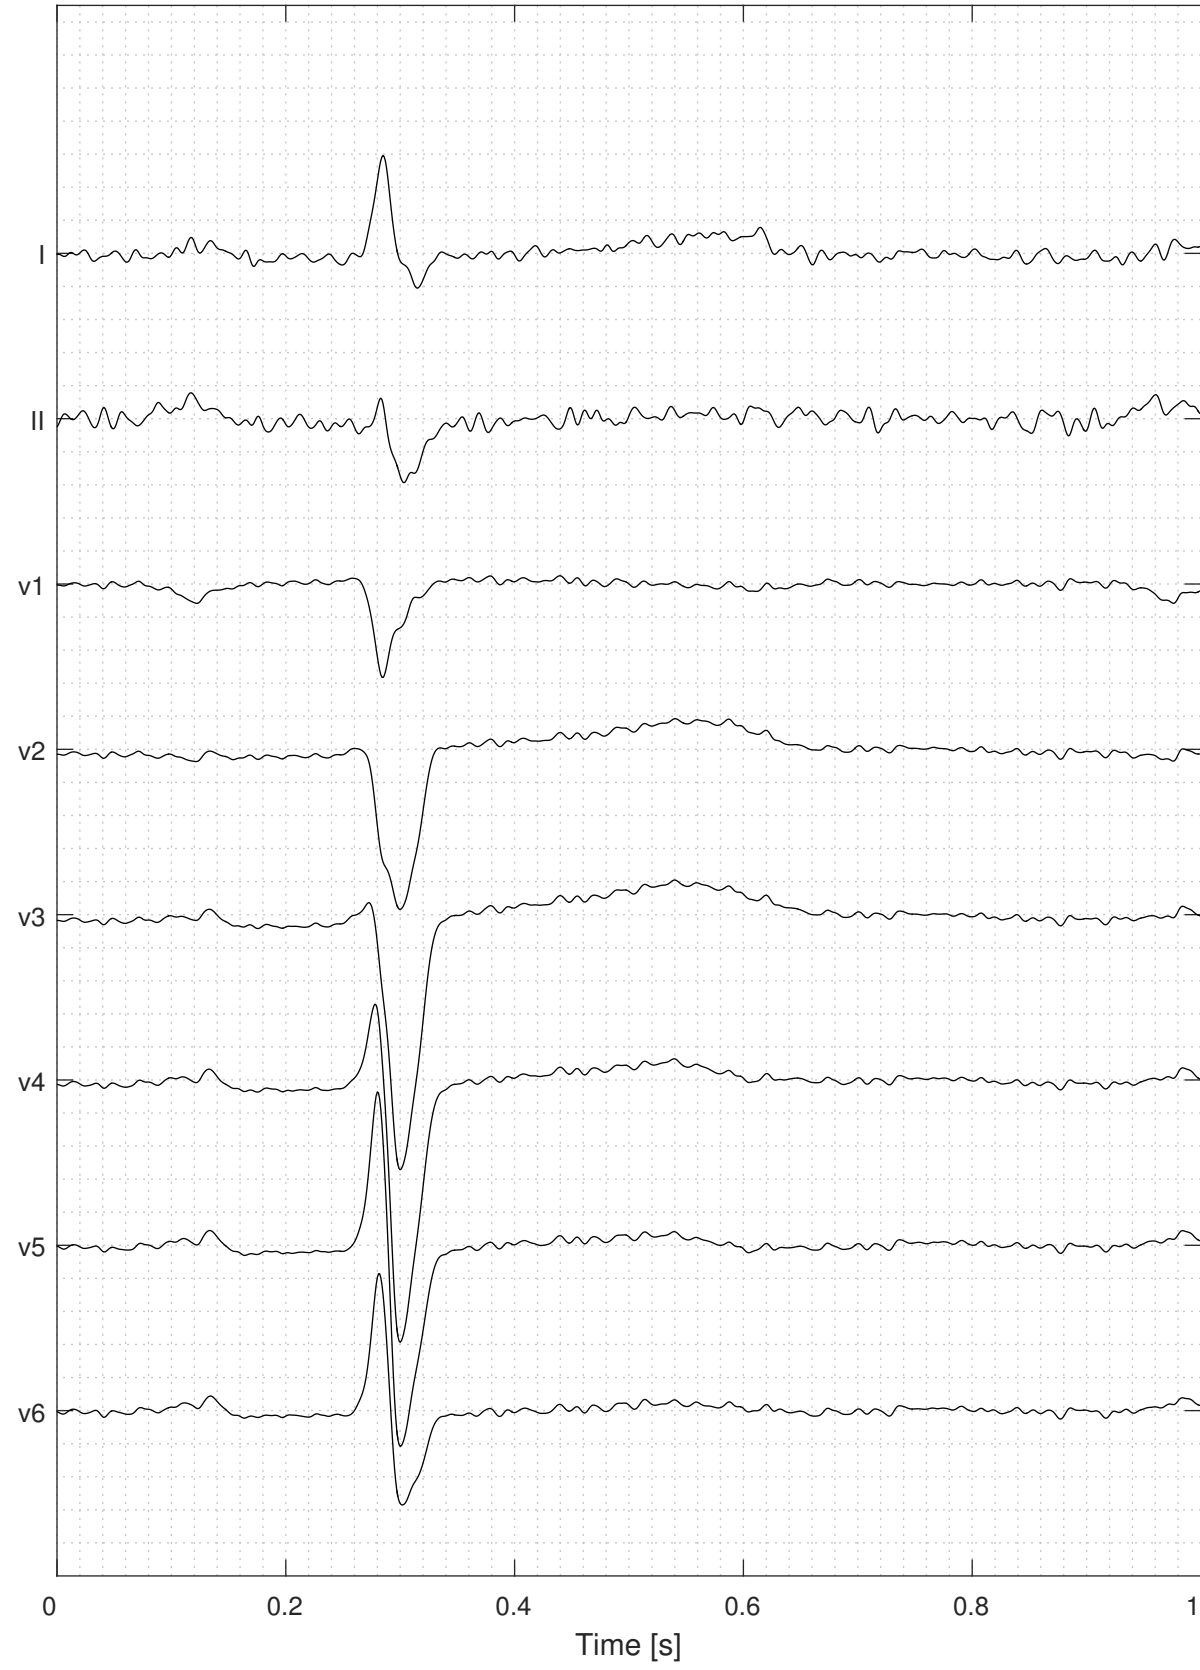

High RR, Complex #: 47

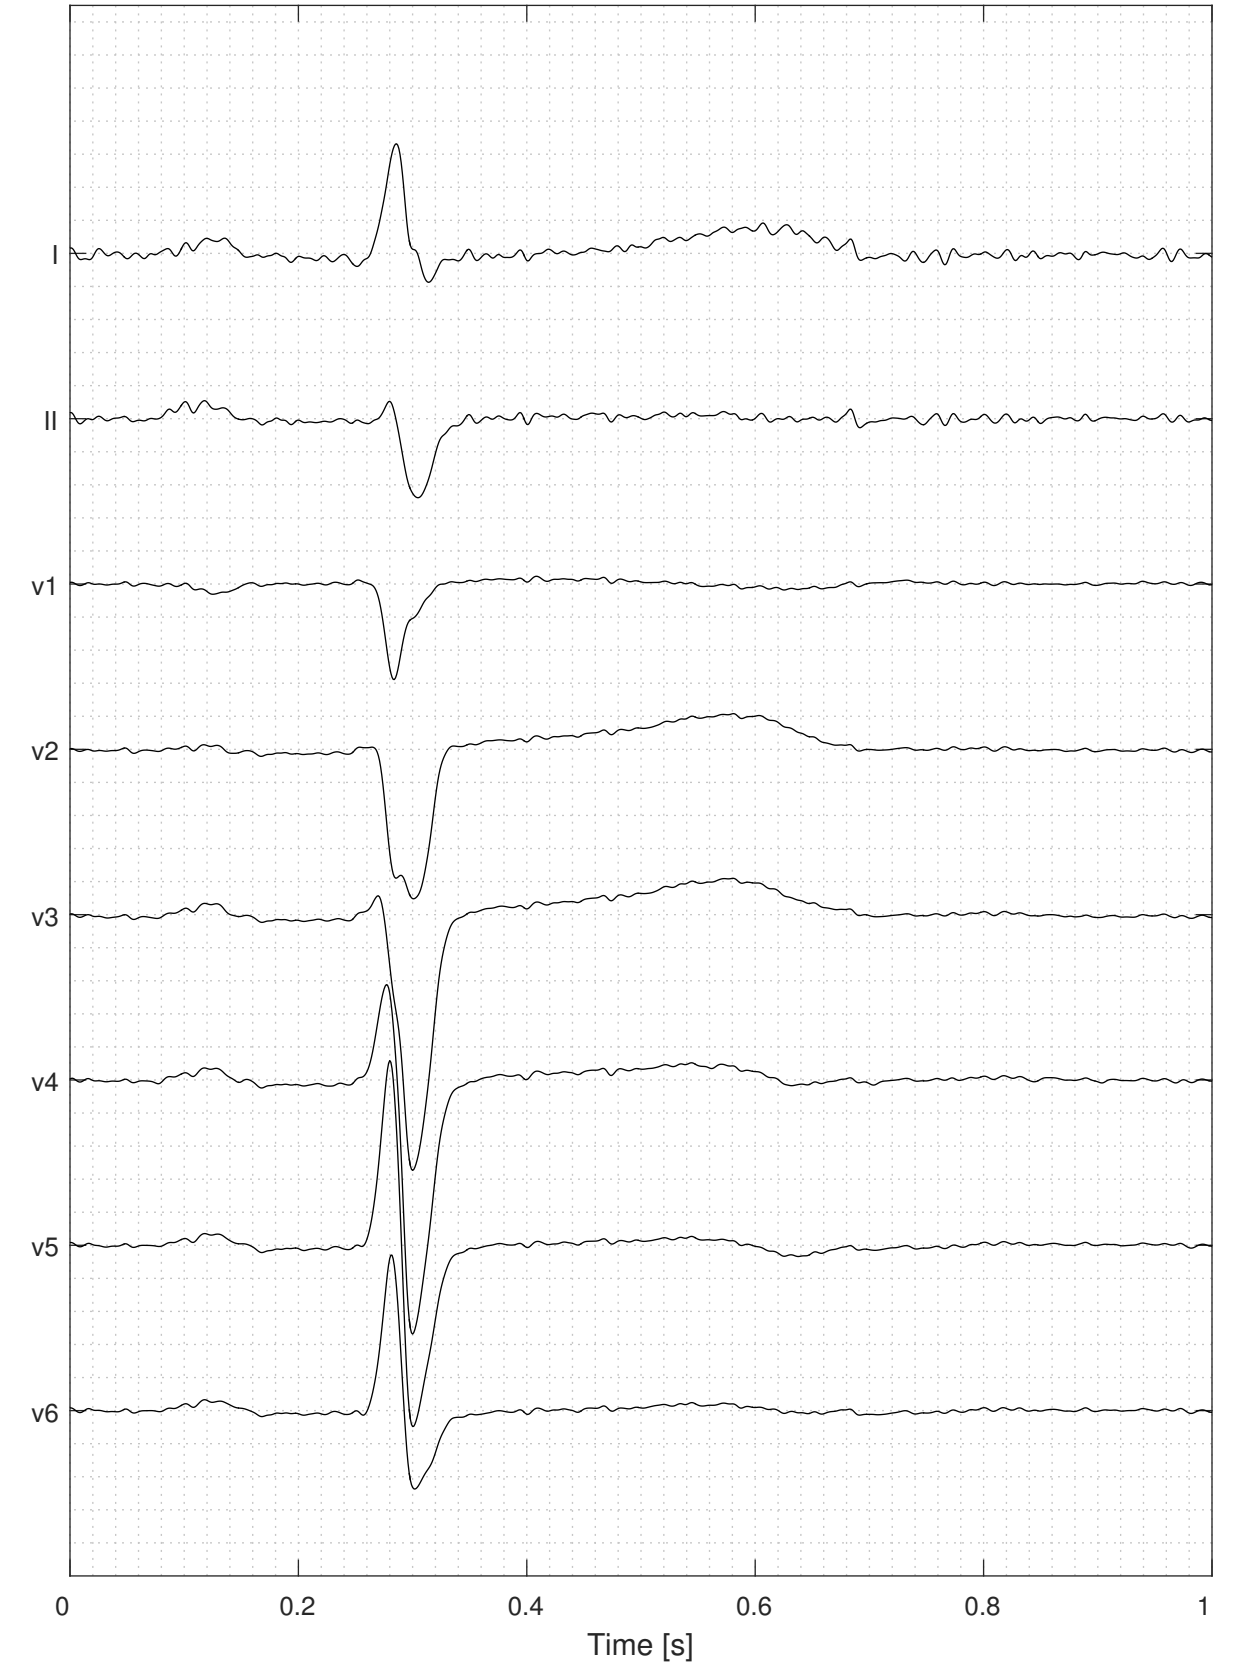

Patient 117

Low RR, Complex #: 321

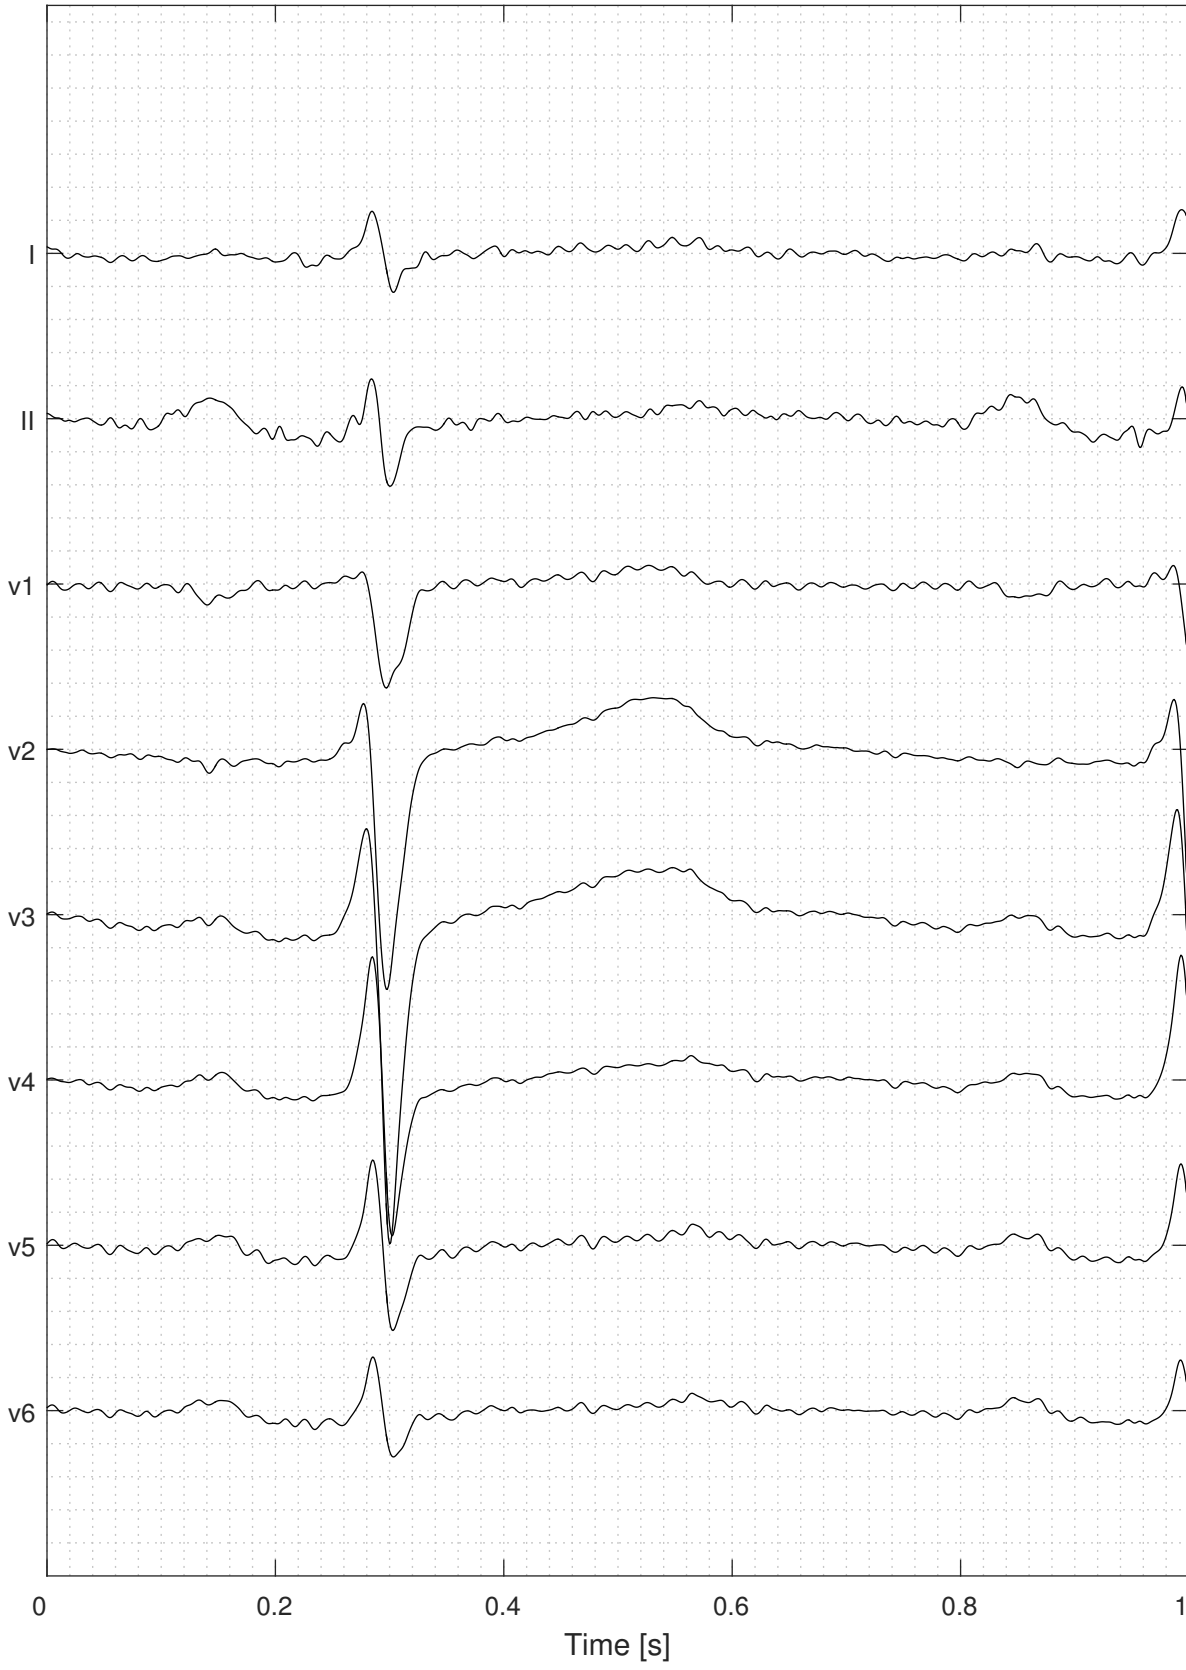

Mid RR, Complex #: 173

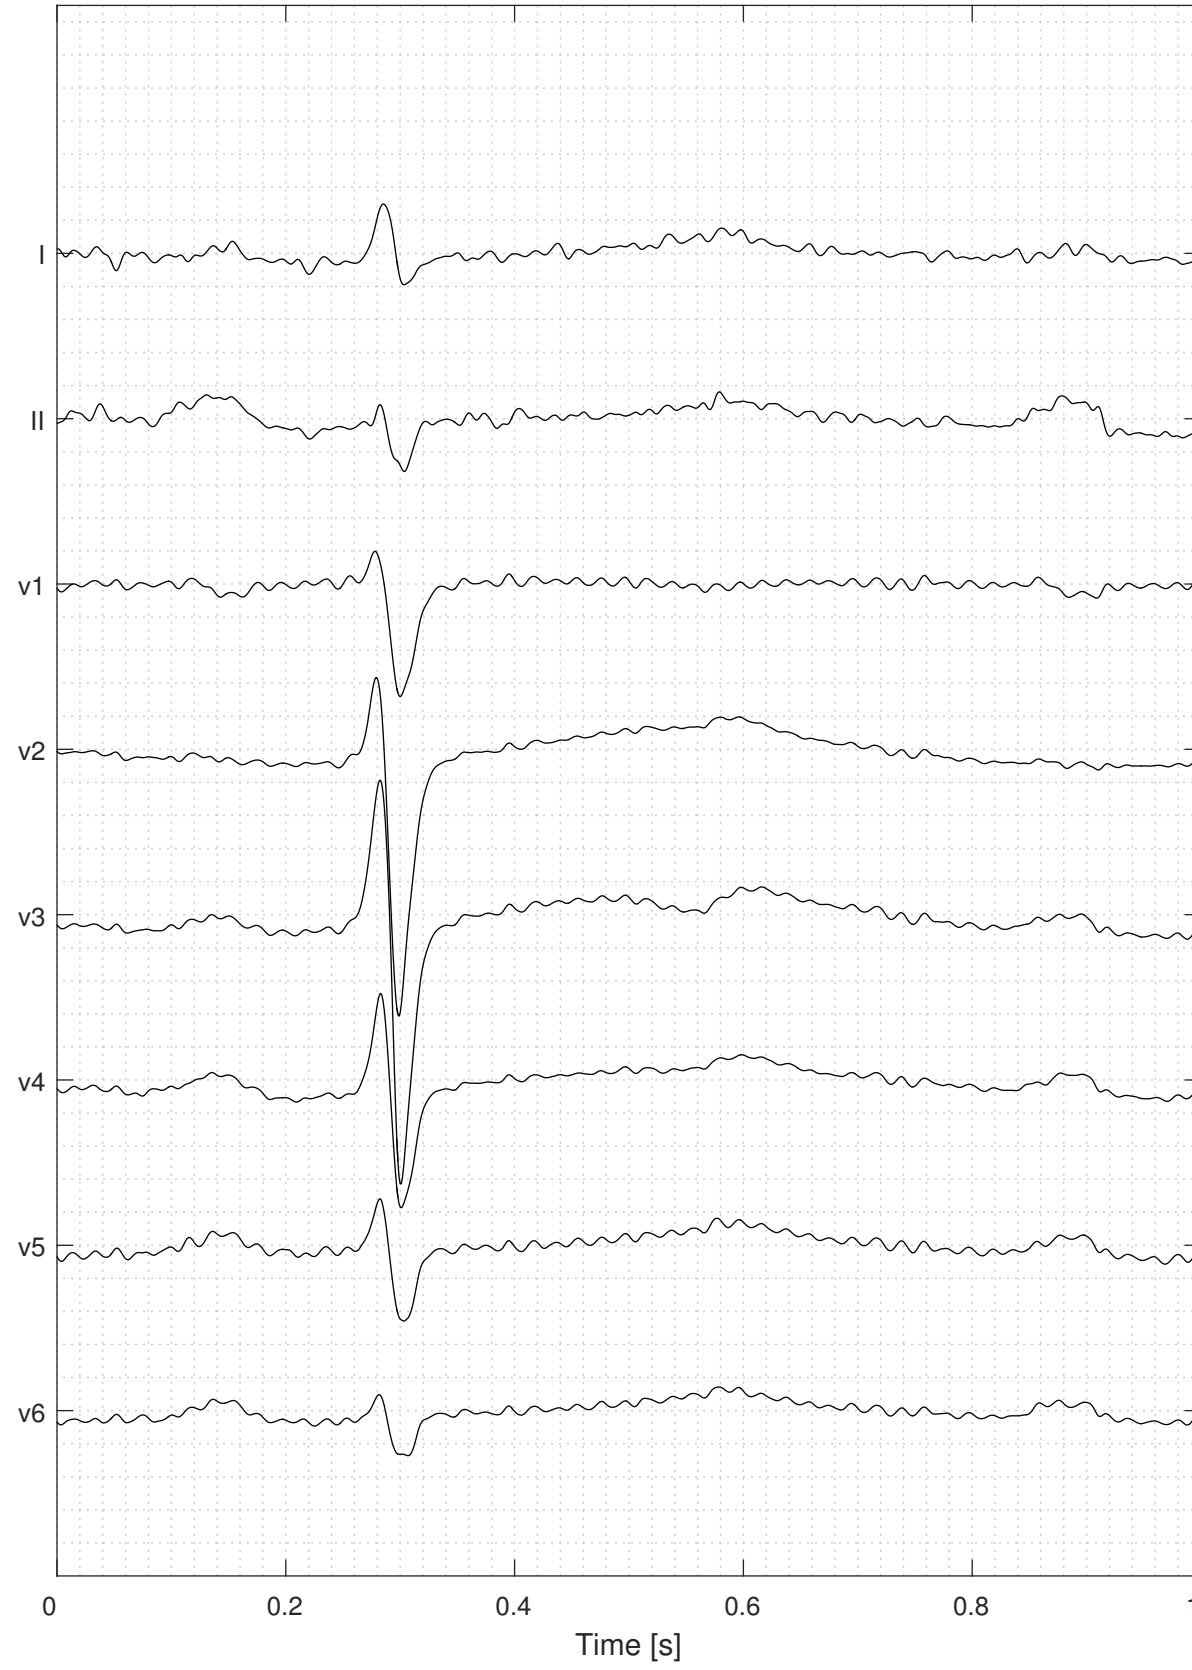

High RR, Complex #: 70

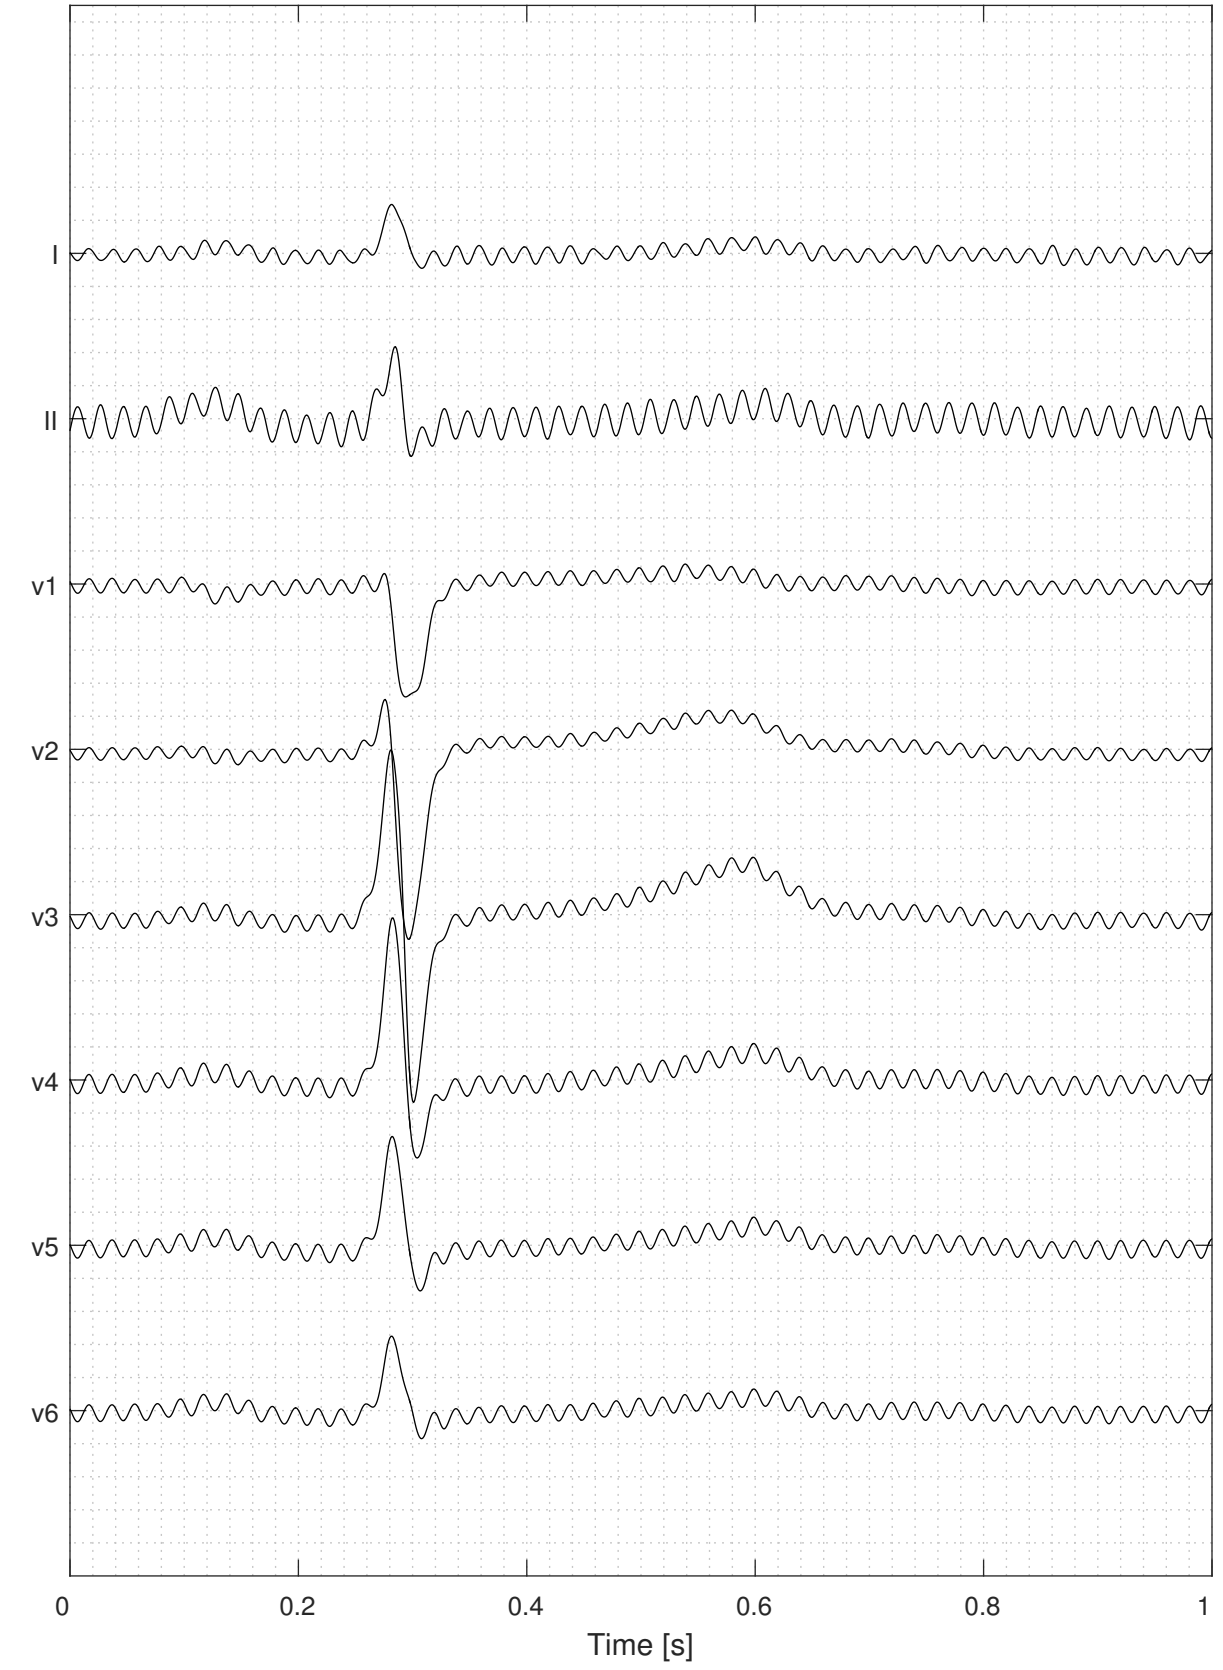

Patient 118

Low RR, Complex #: 348

Mid RR, Complex #: 140

High RR, Complex #: 171

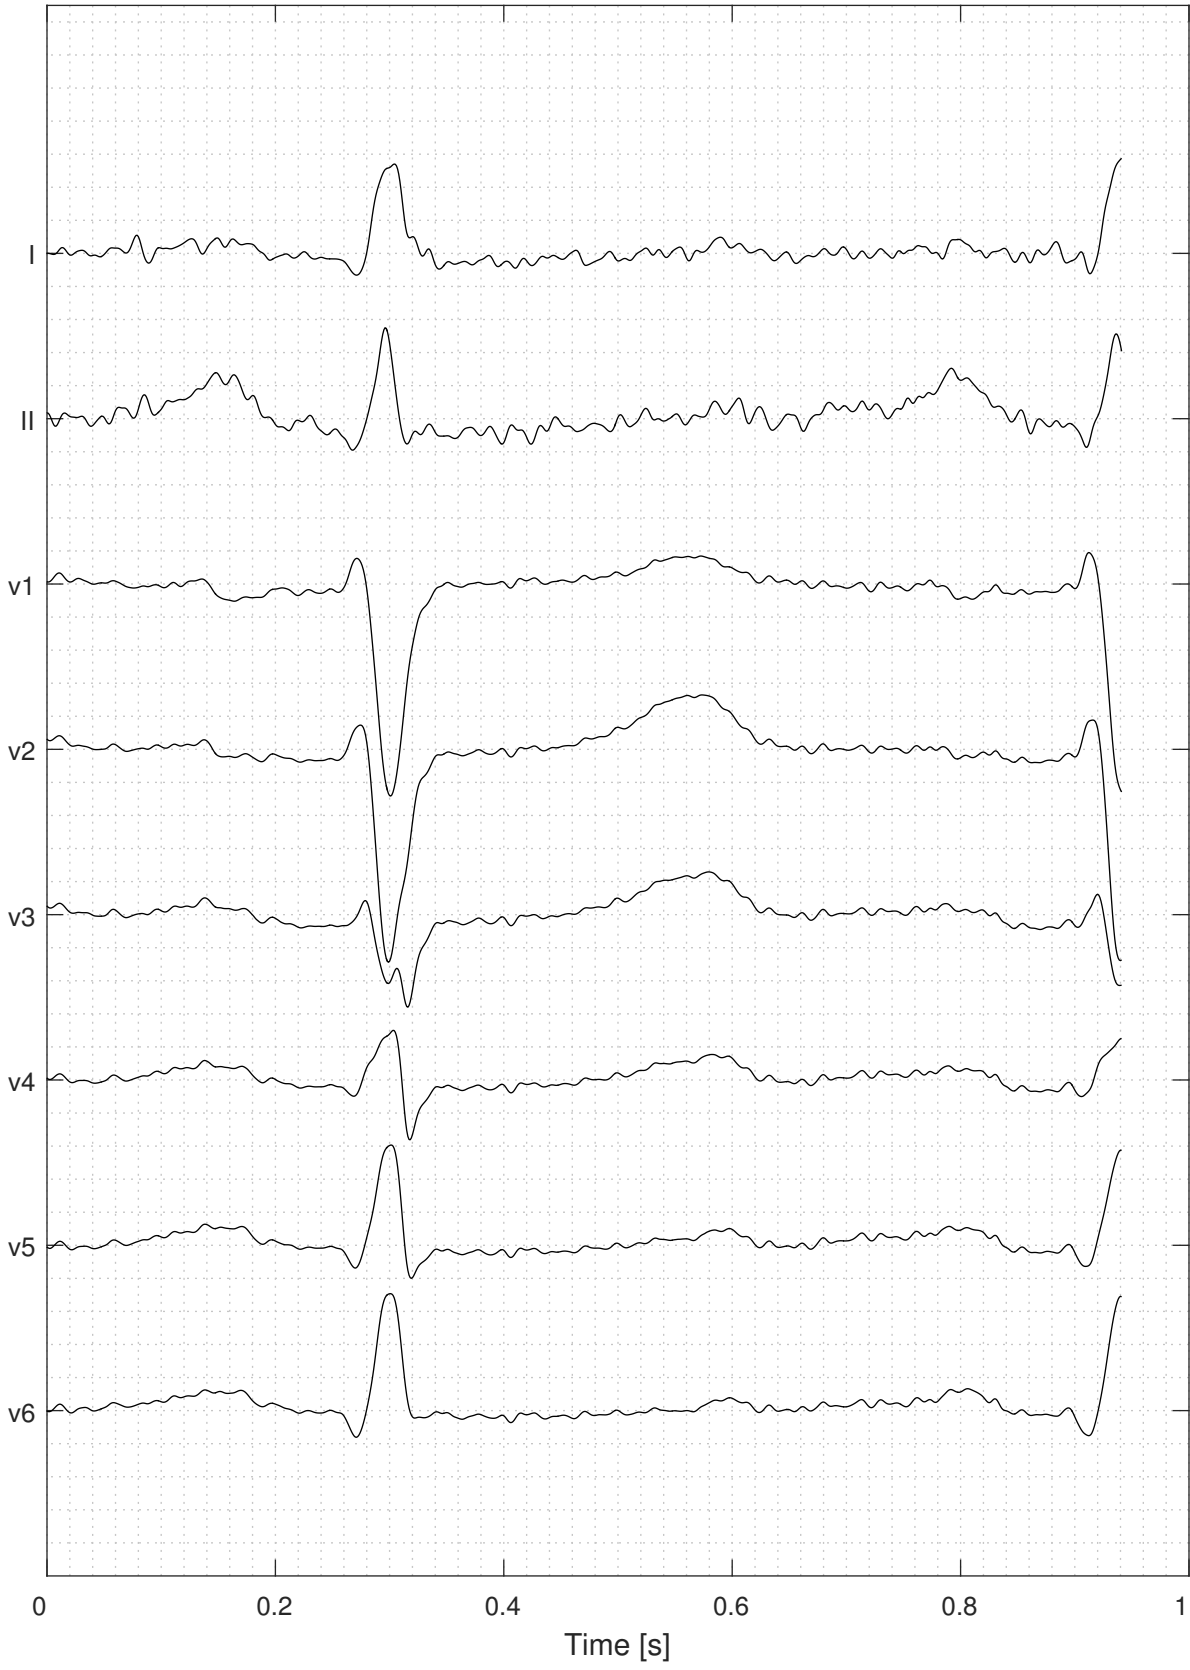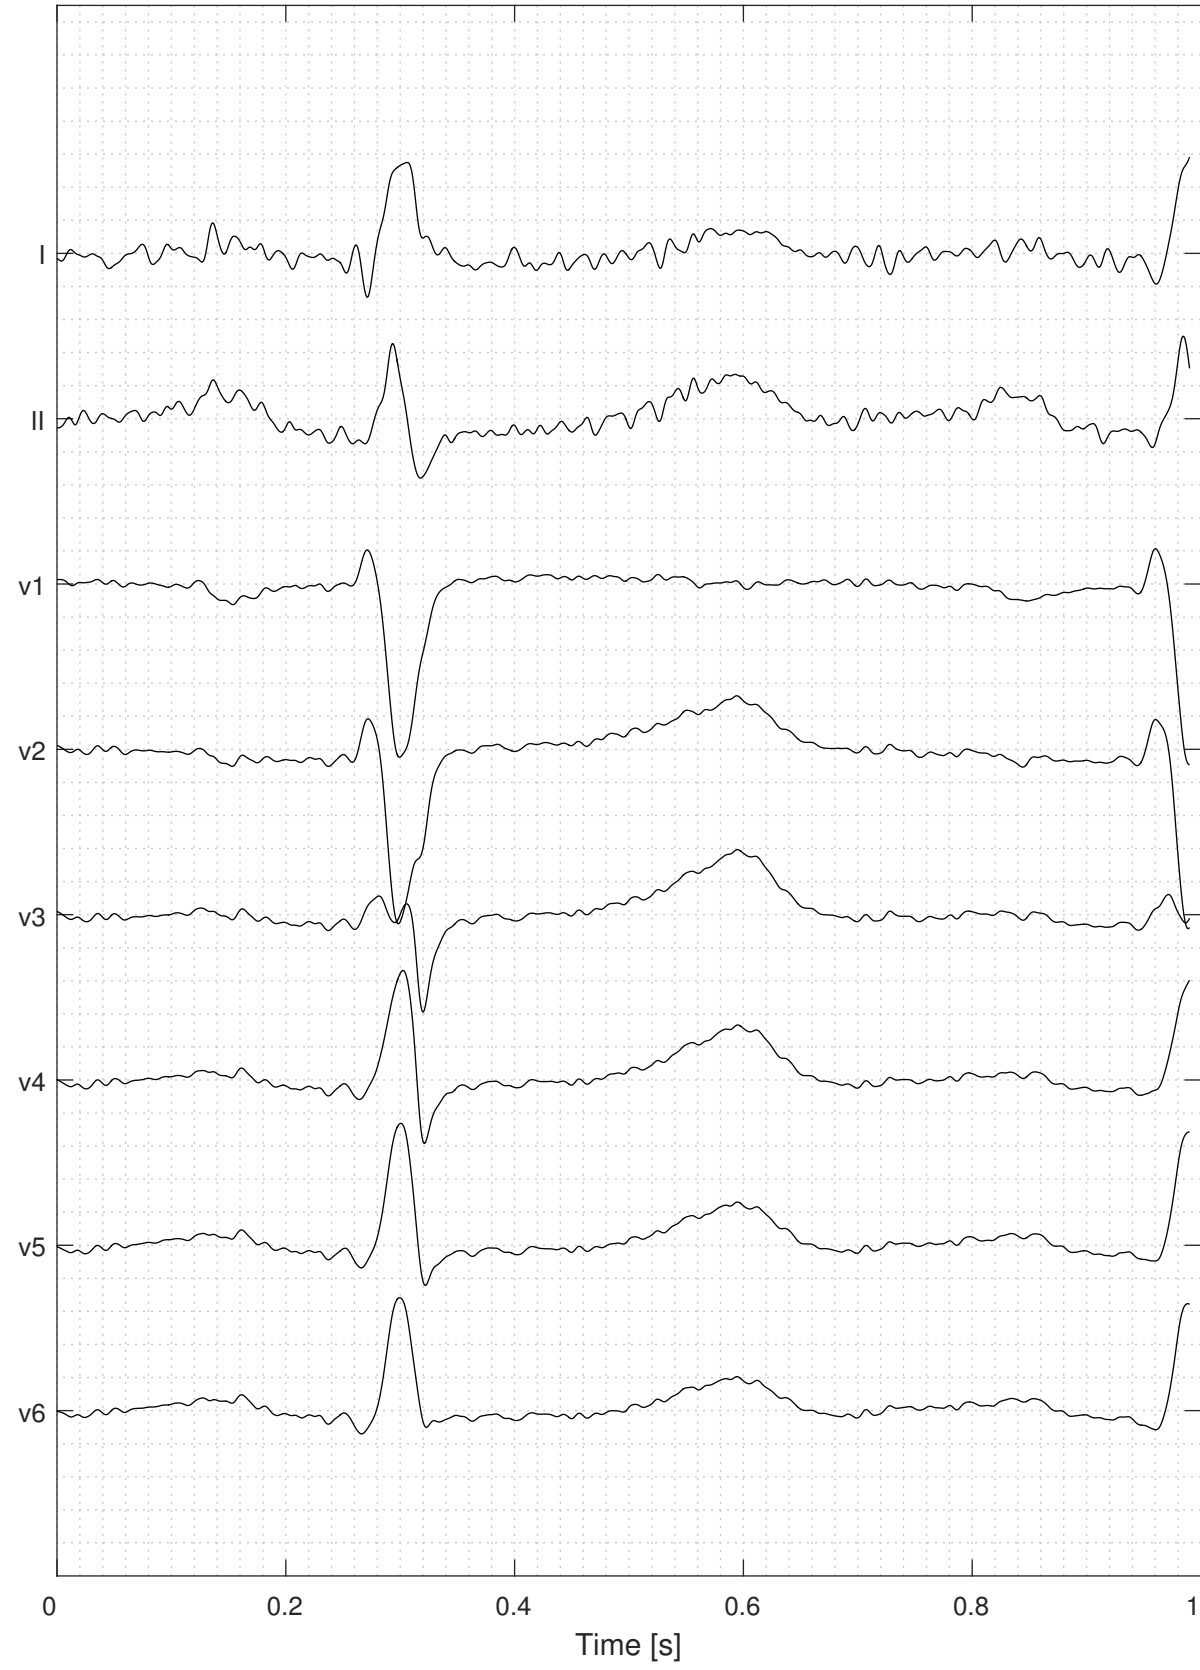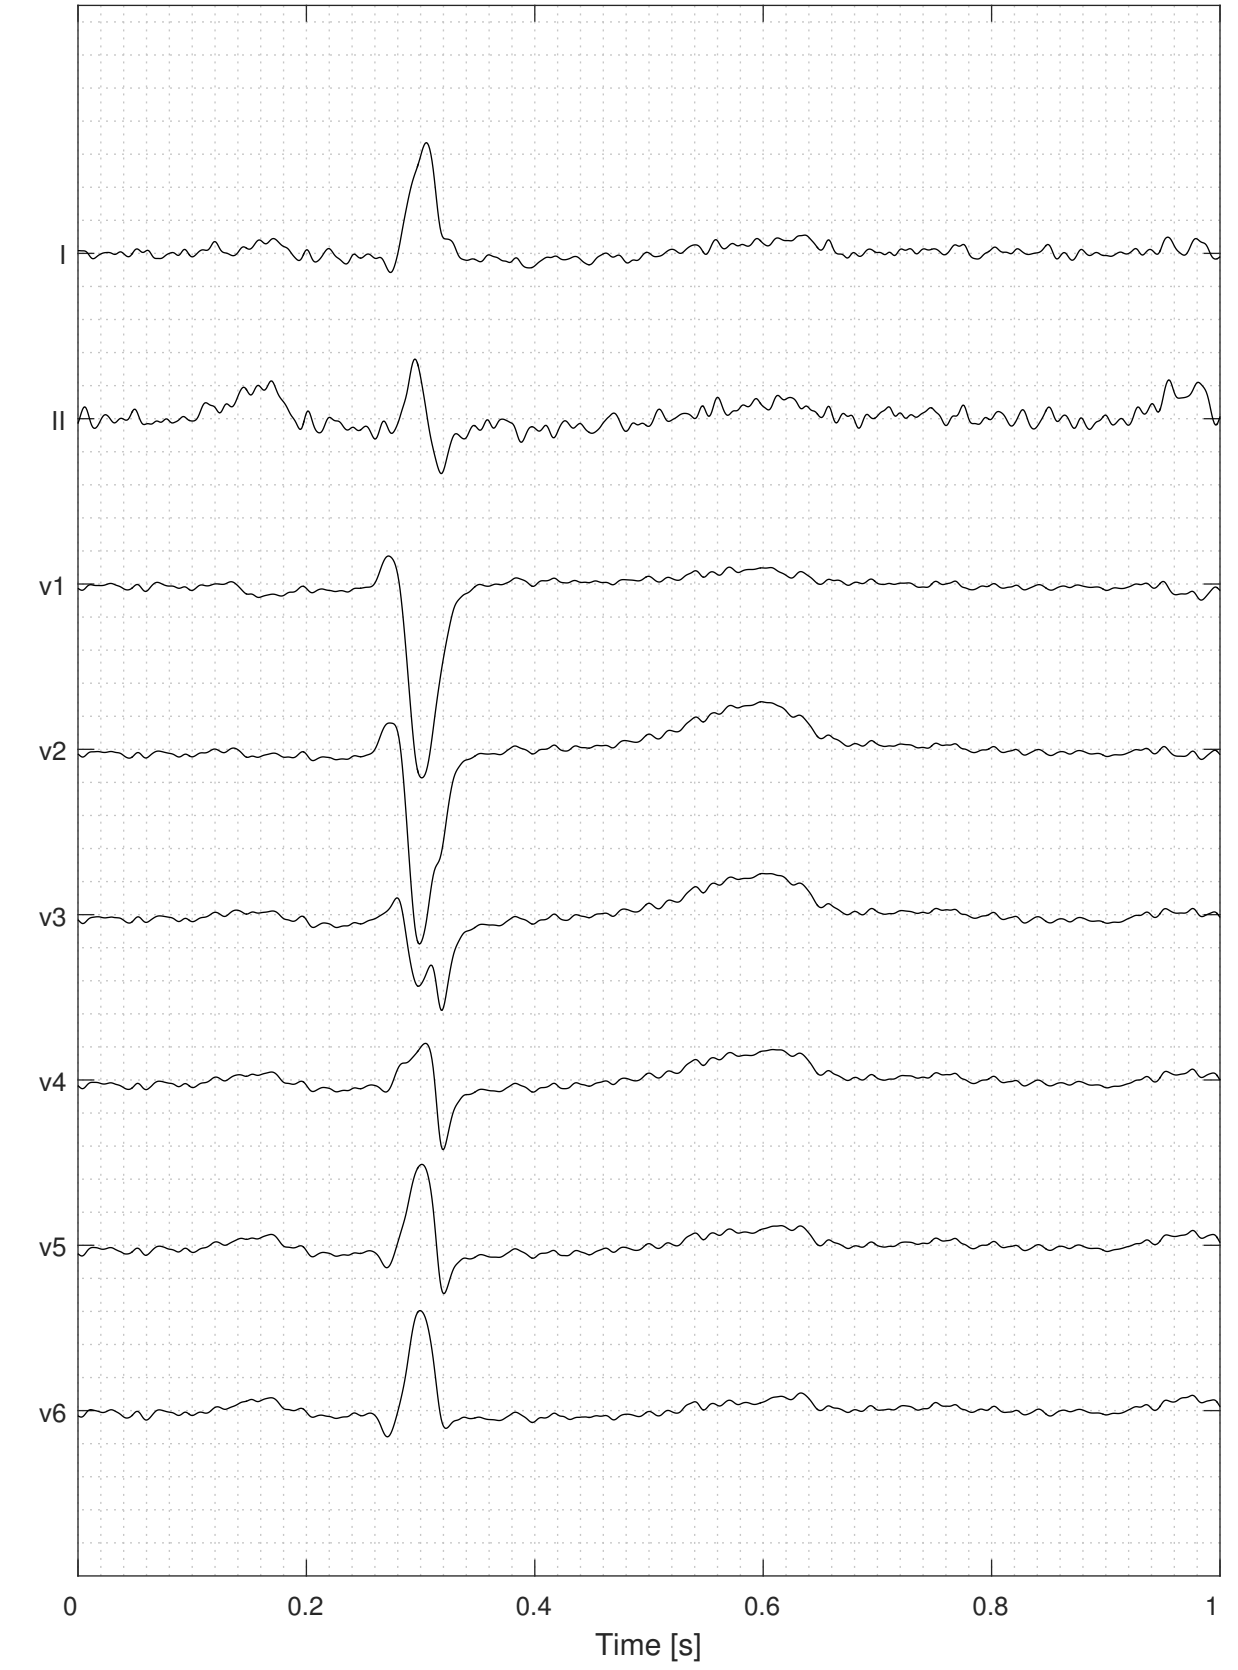

Patient 119

Low RR, Complex #: 185

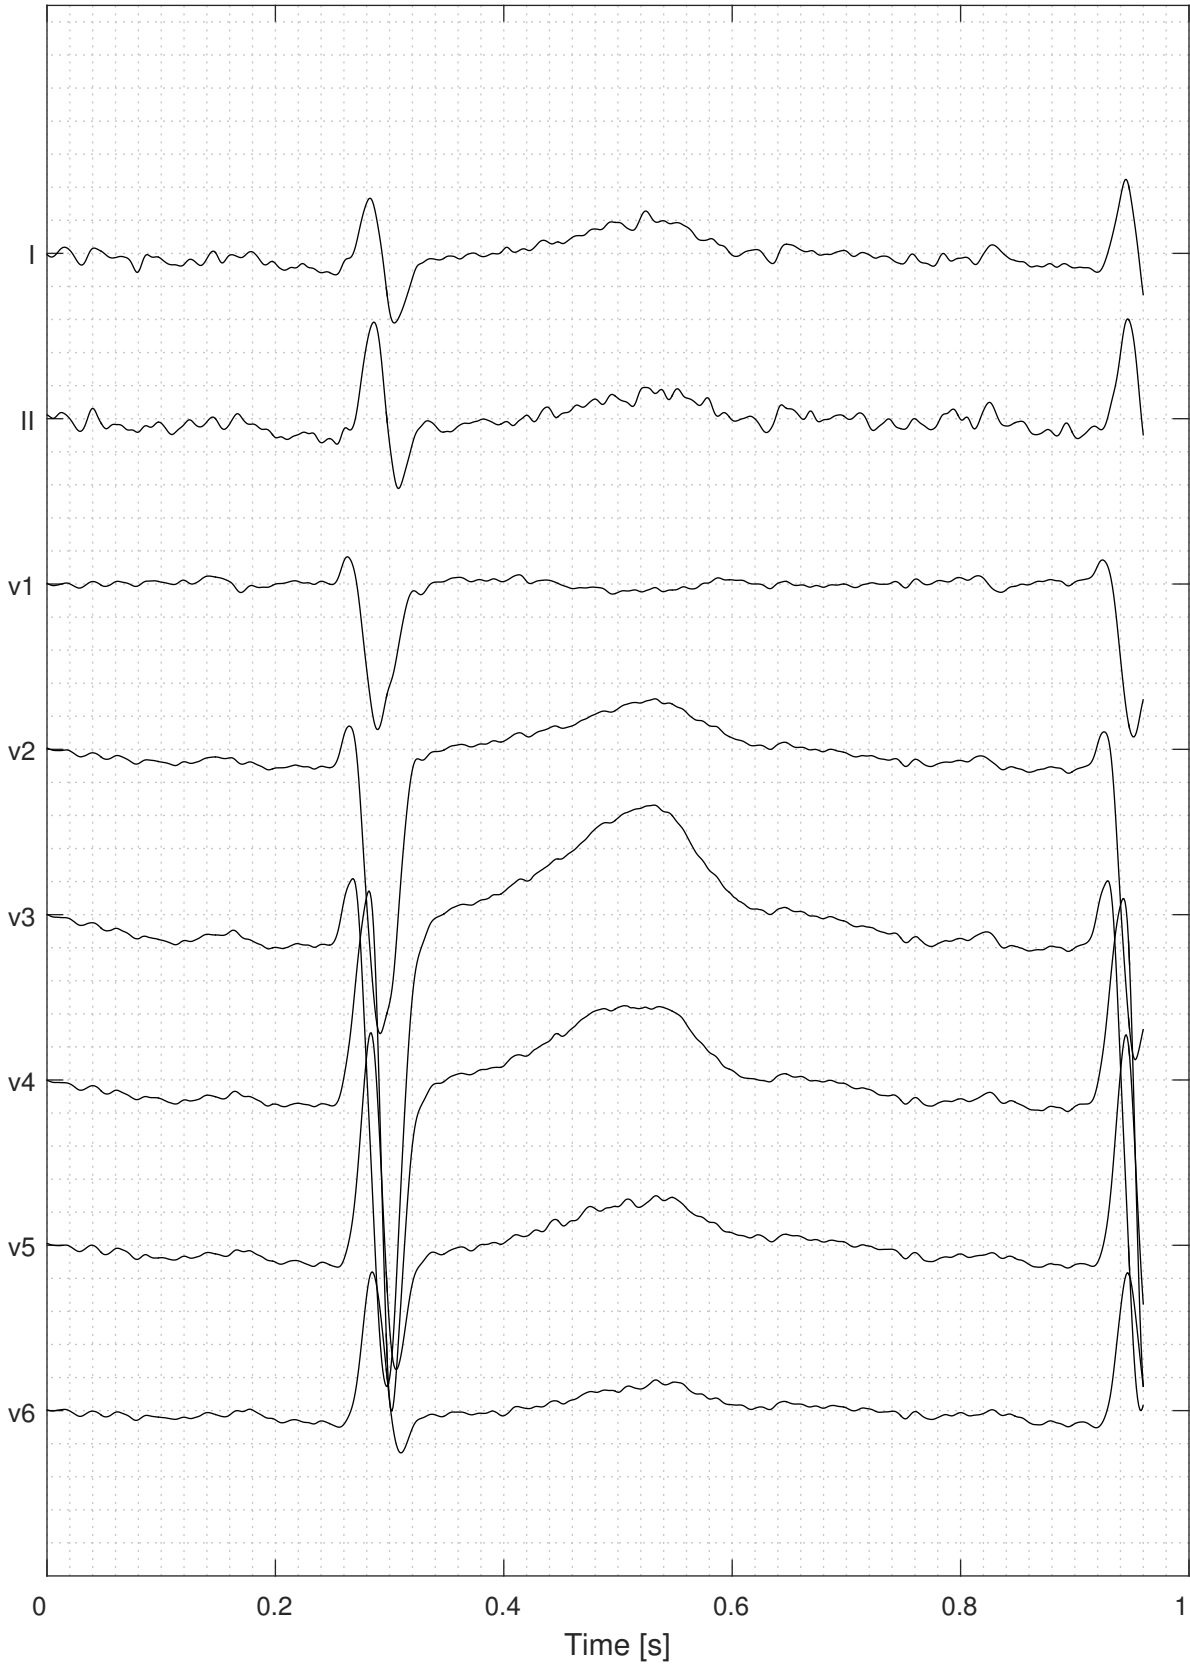

Mid RR, Complex #: 204

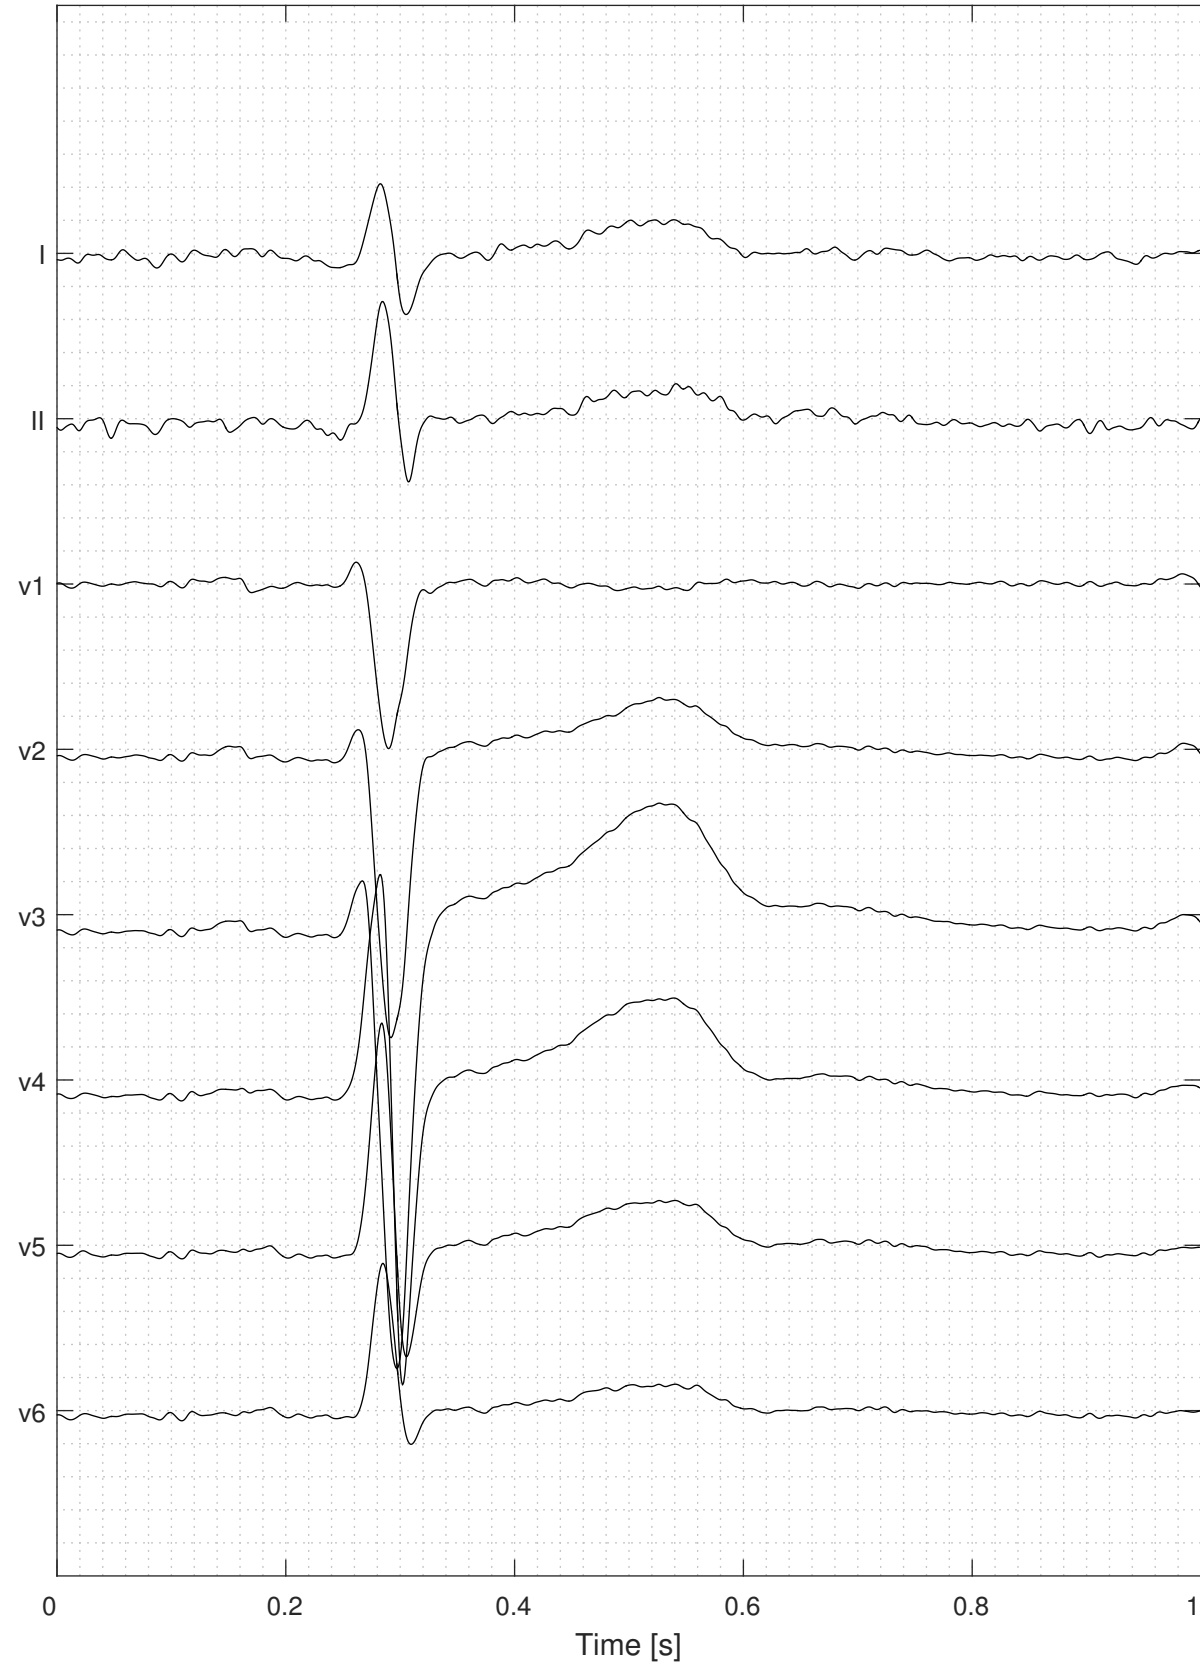

High RR, Complex #: 150

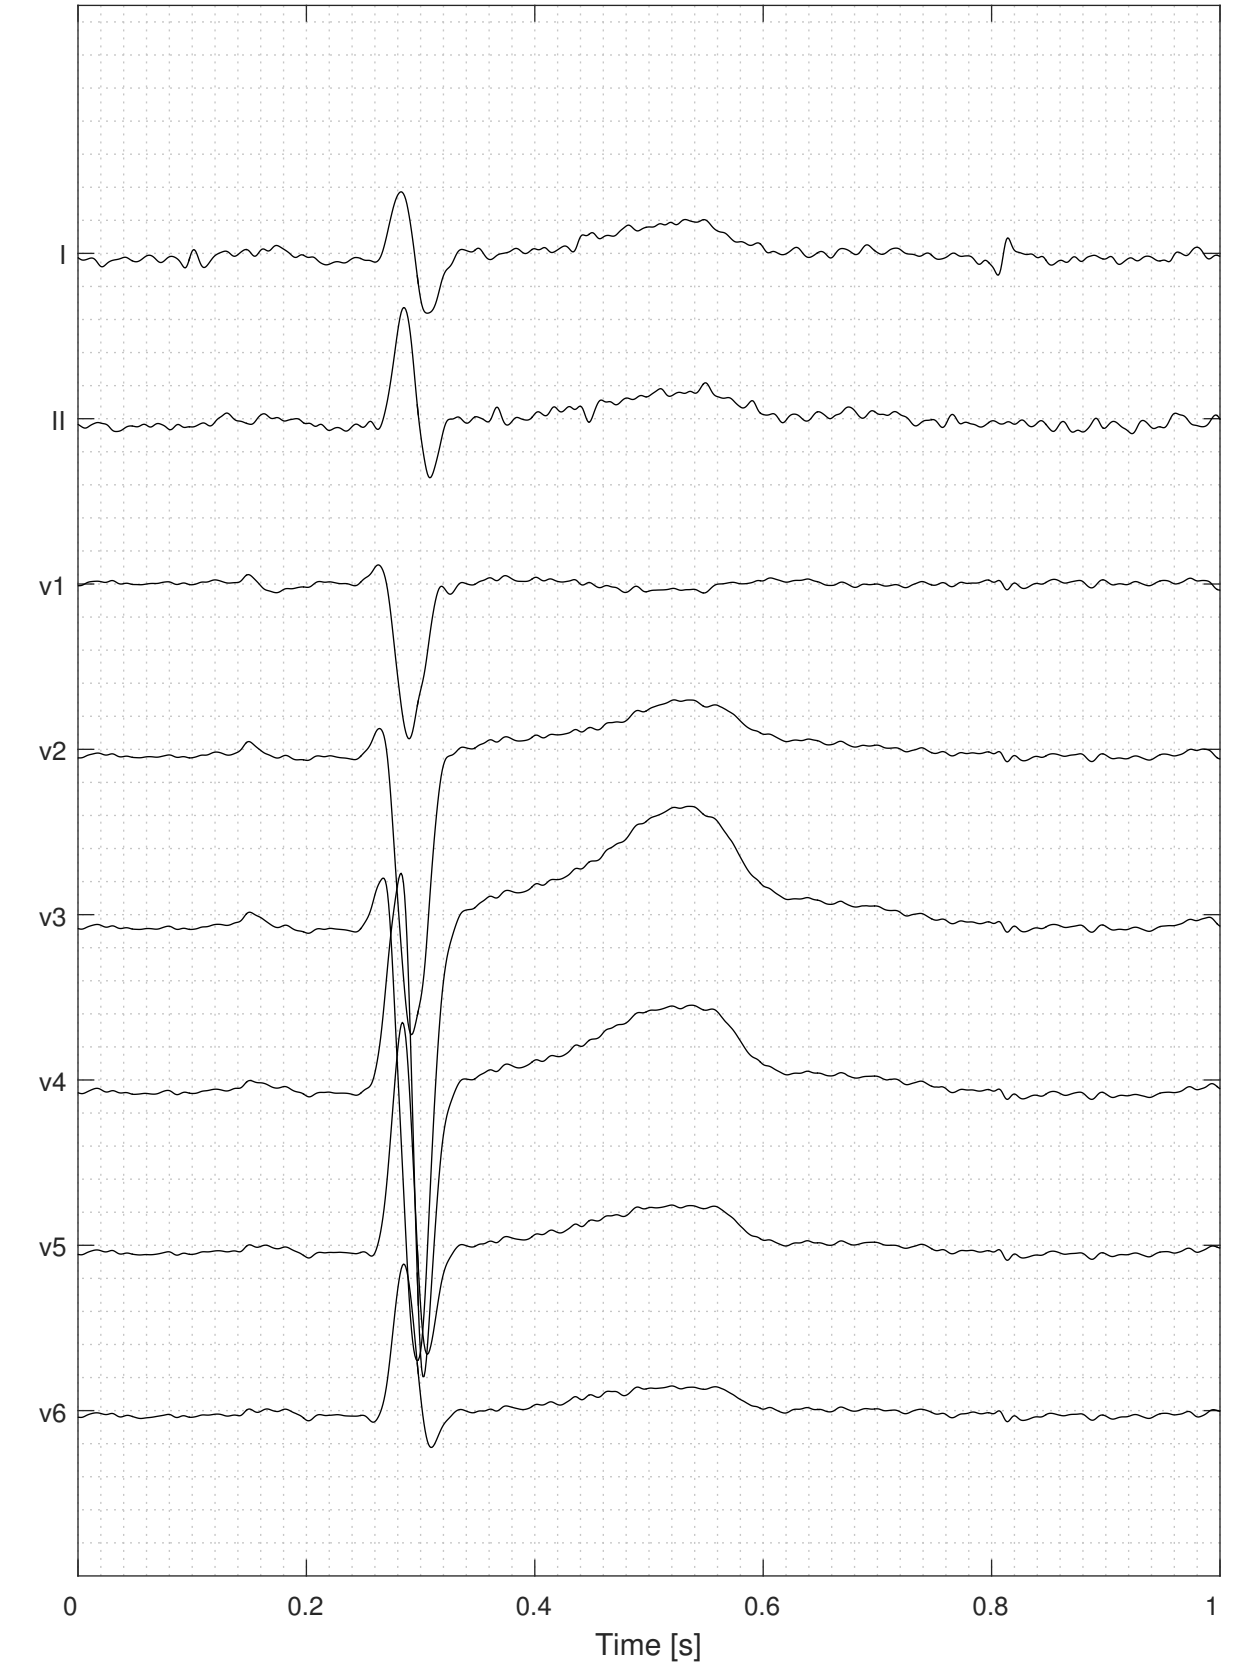

Patient 120

Low RR, Complex #: 255

Mid RR, Complex #: 391

High RR, Complex #: 83

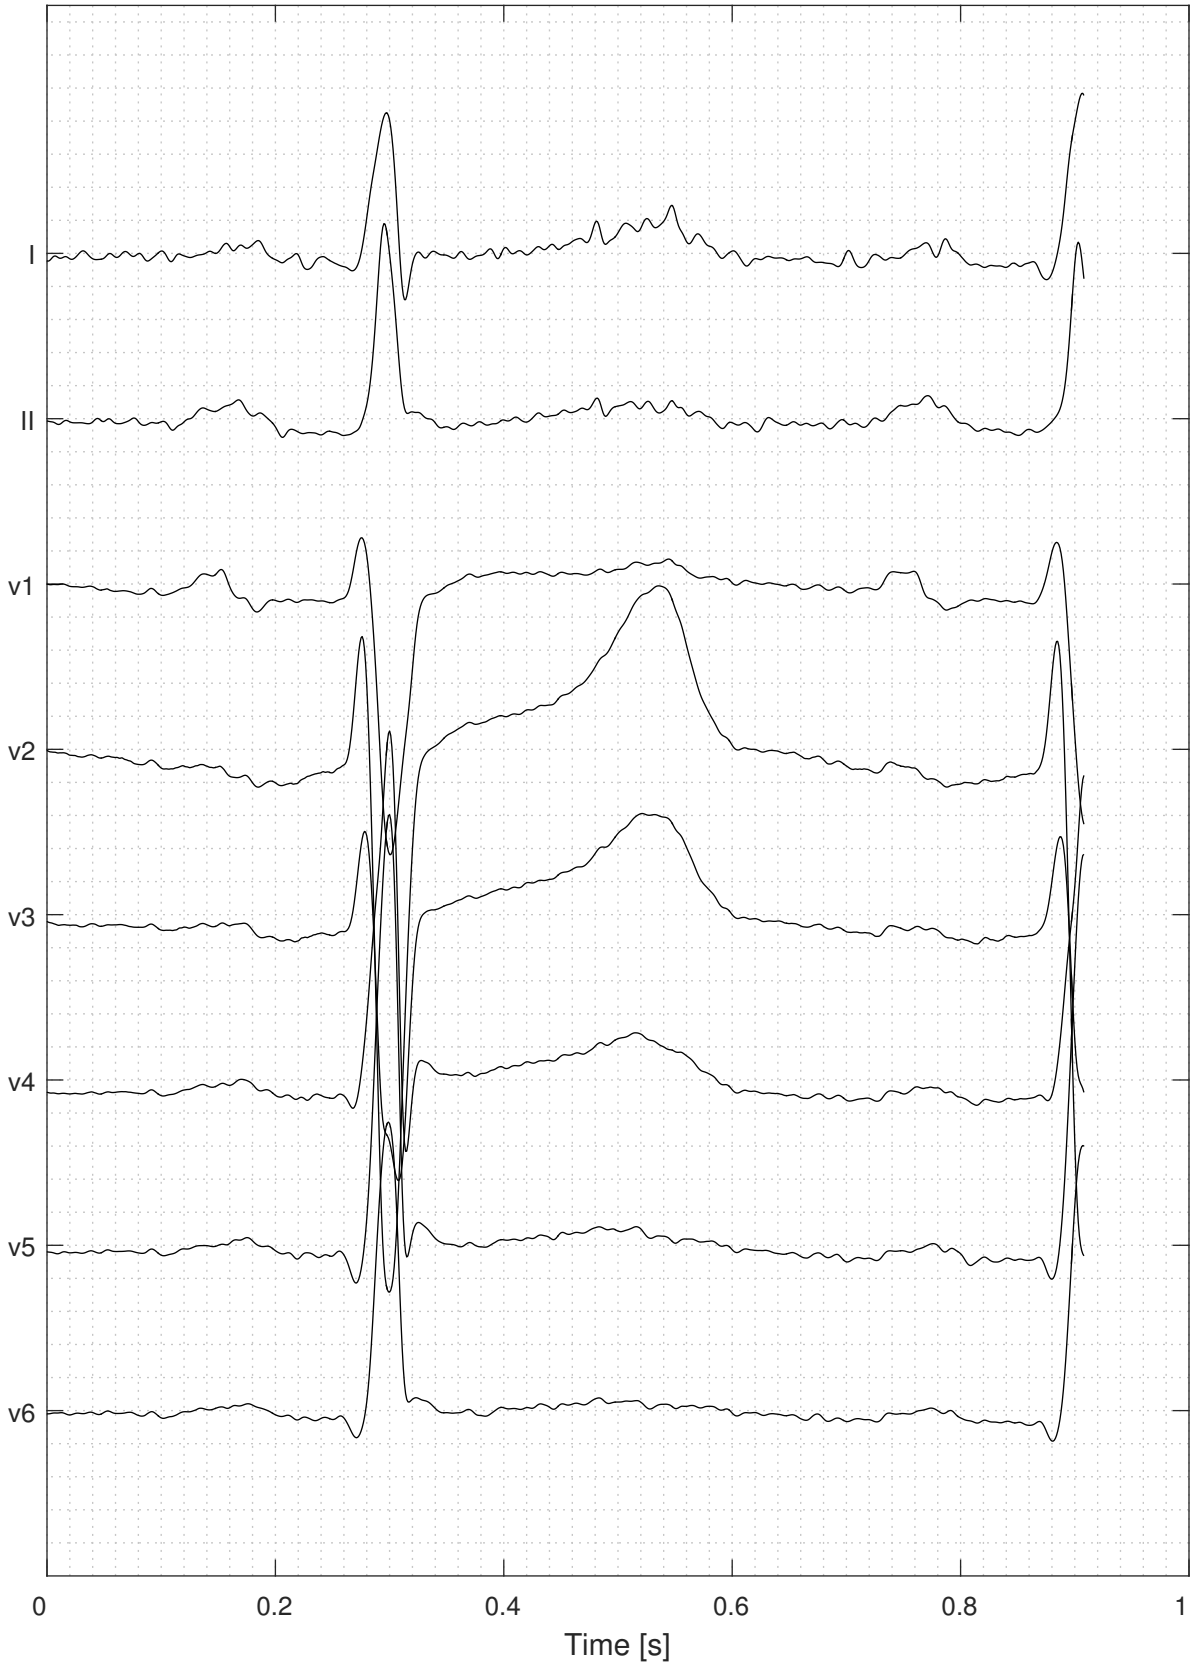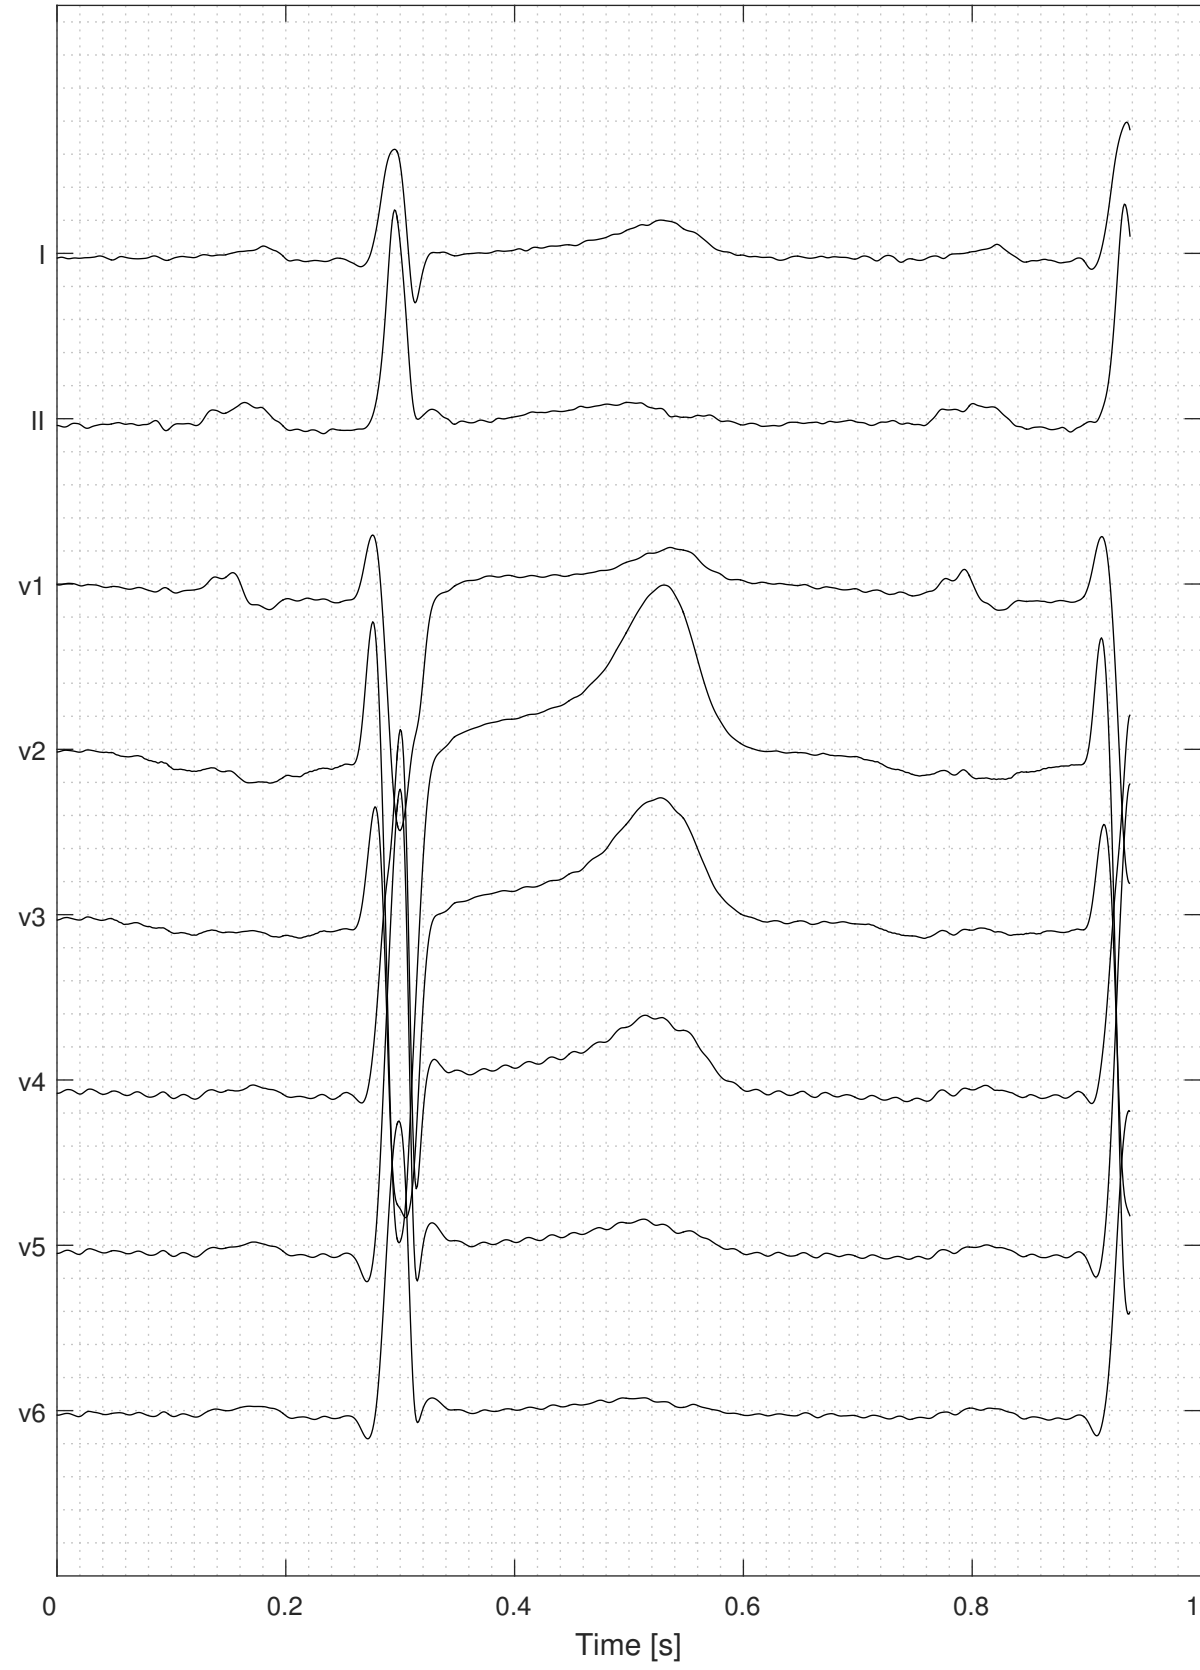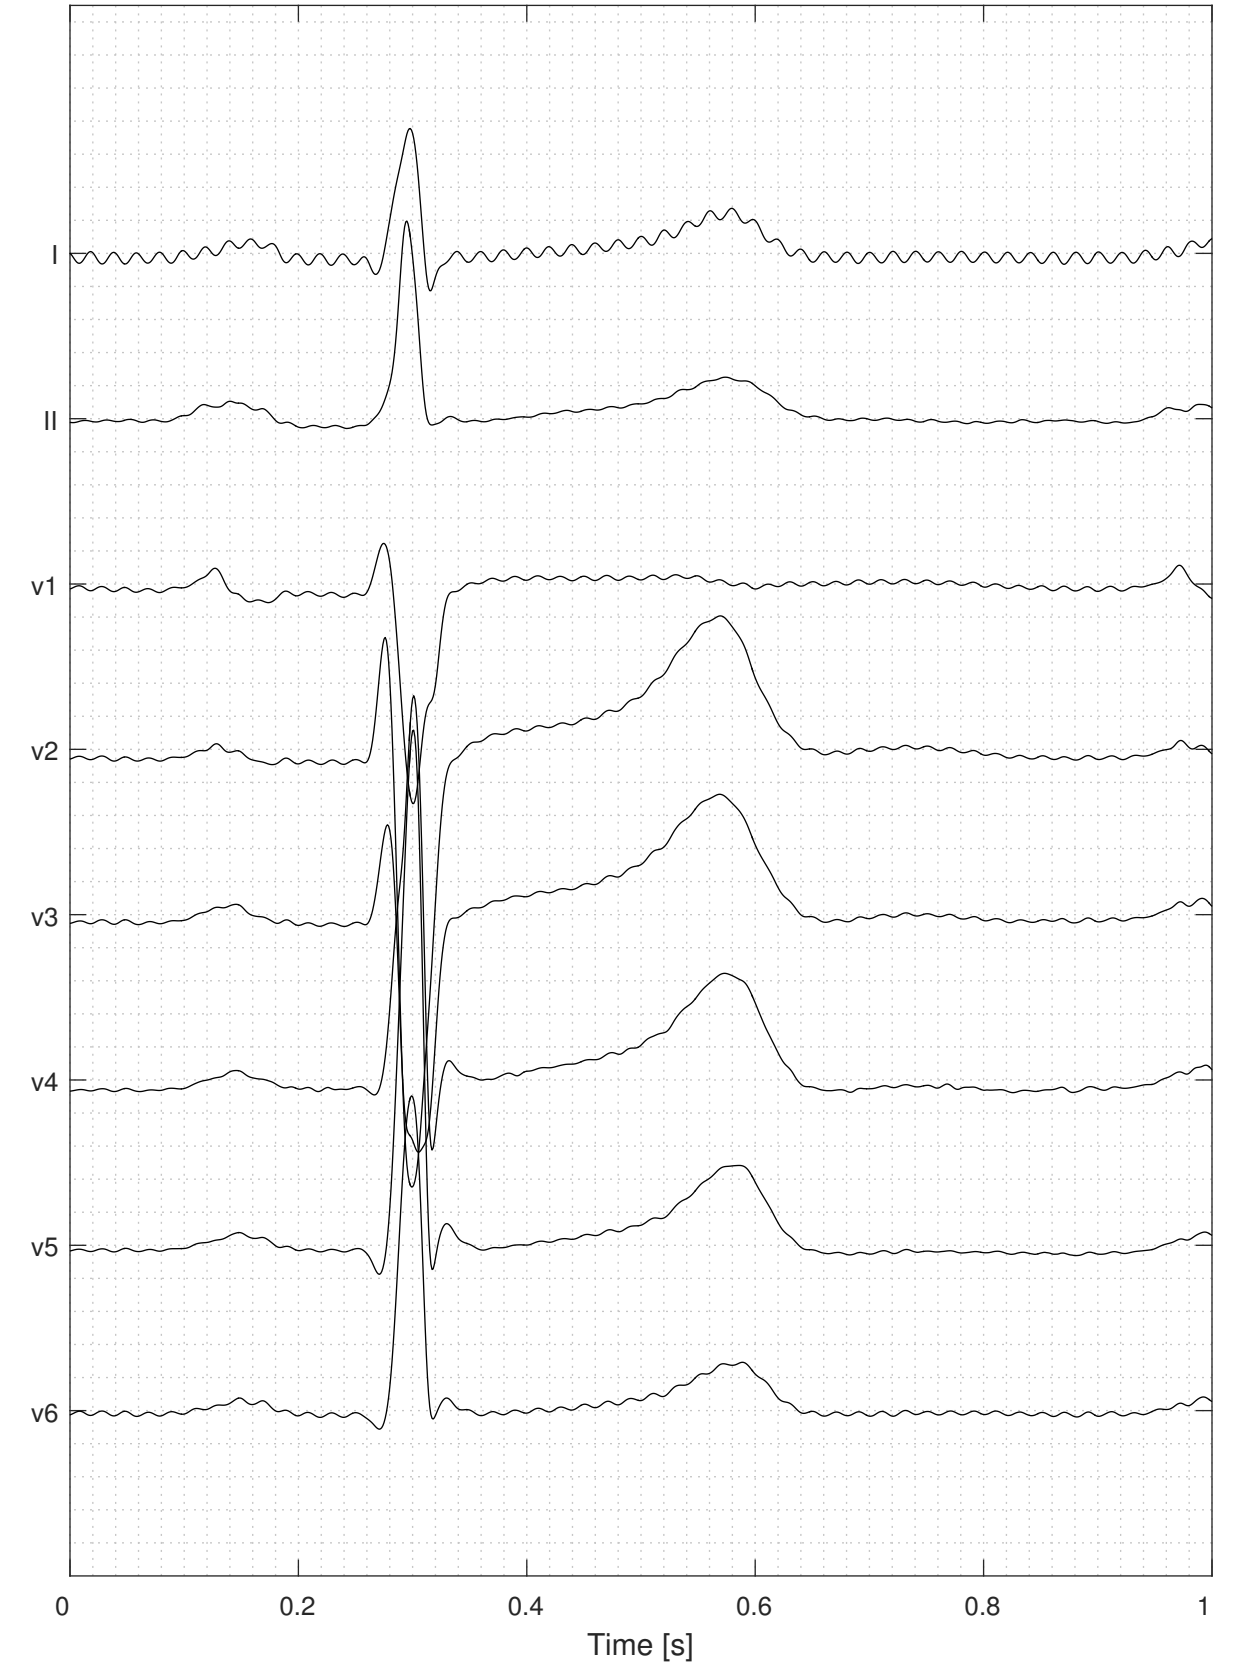



Patient 121

Low RR, Complex #: 166

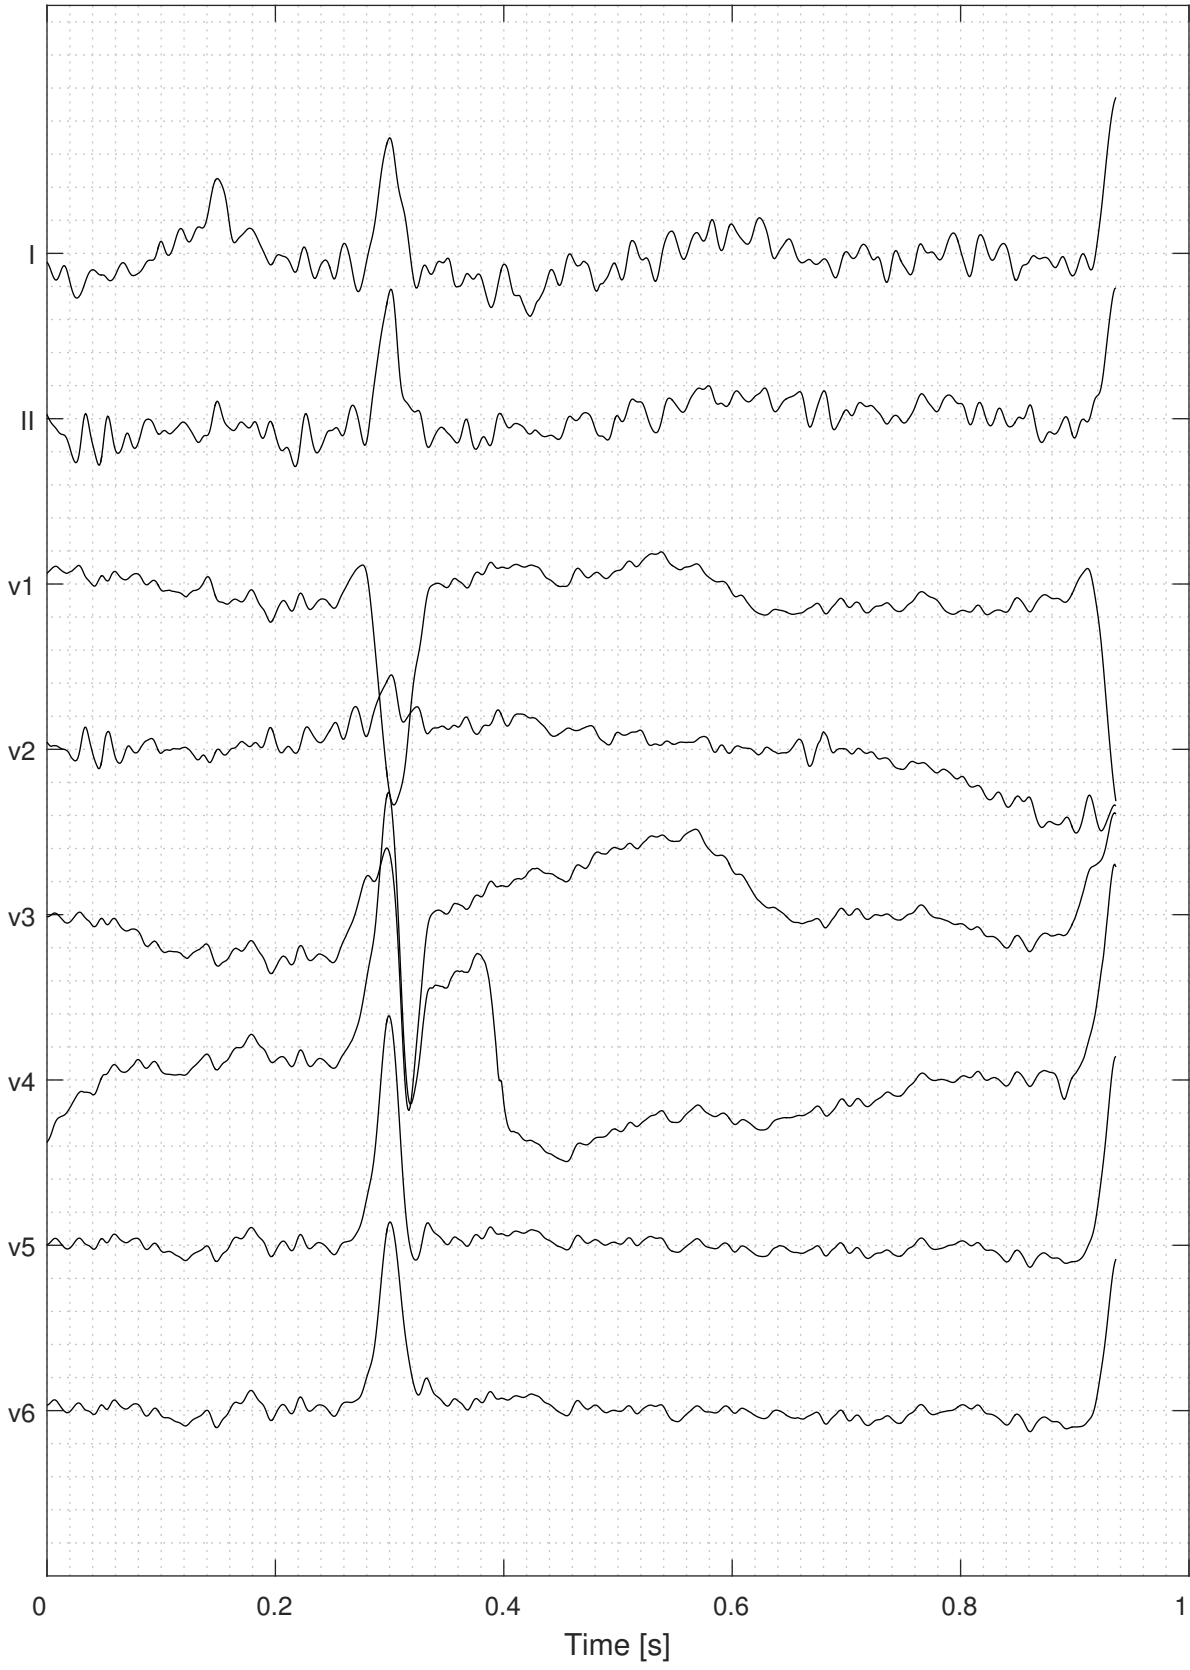

Mid RR, Complex #: 339

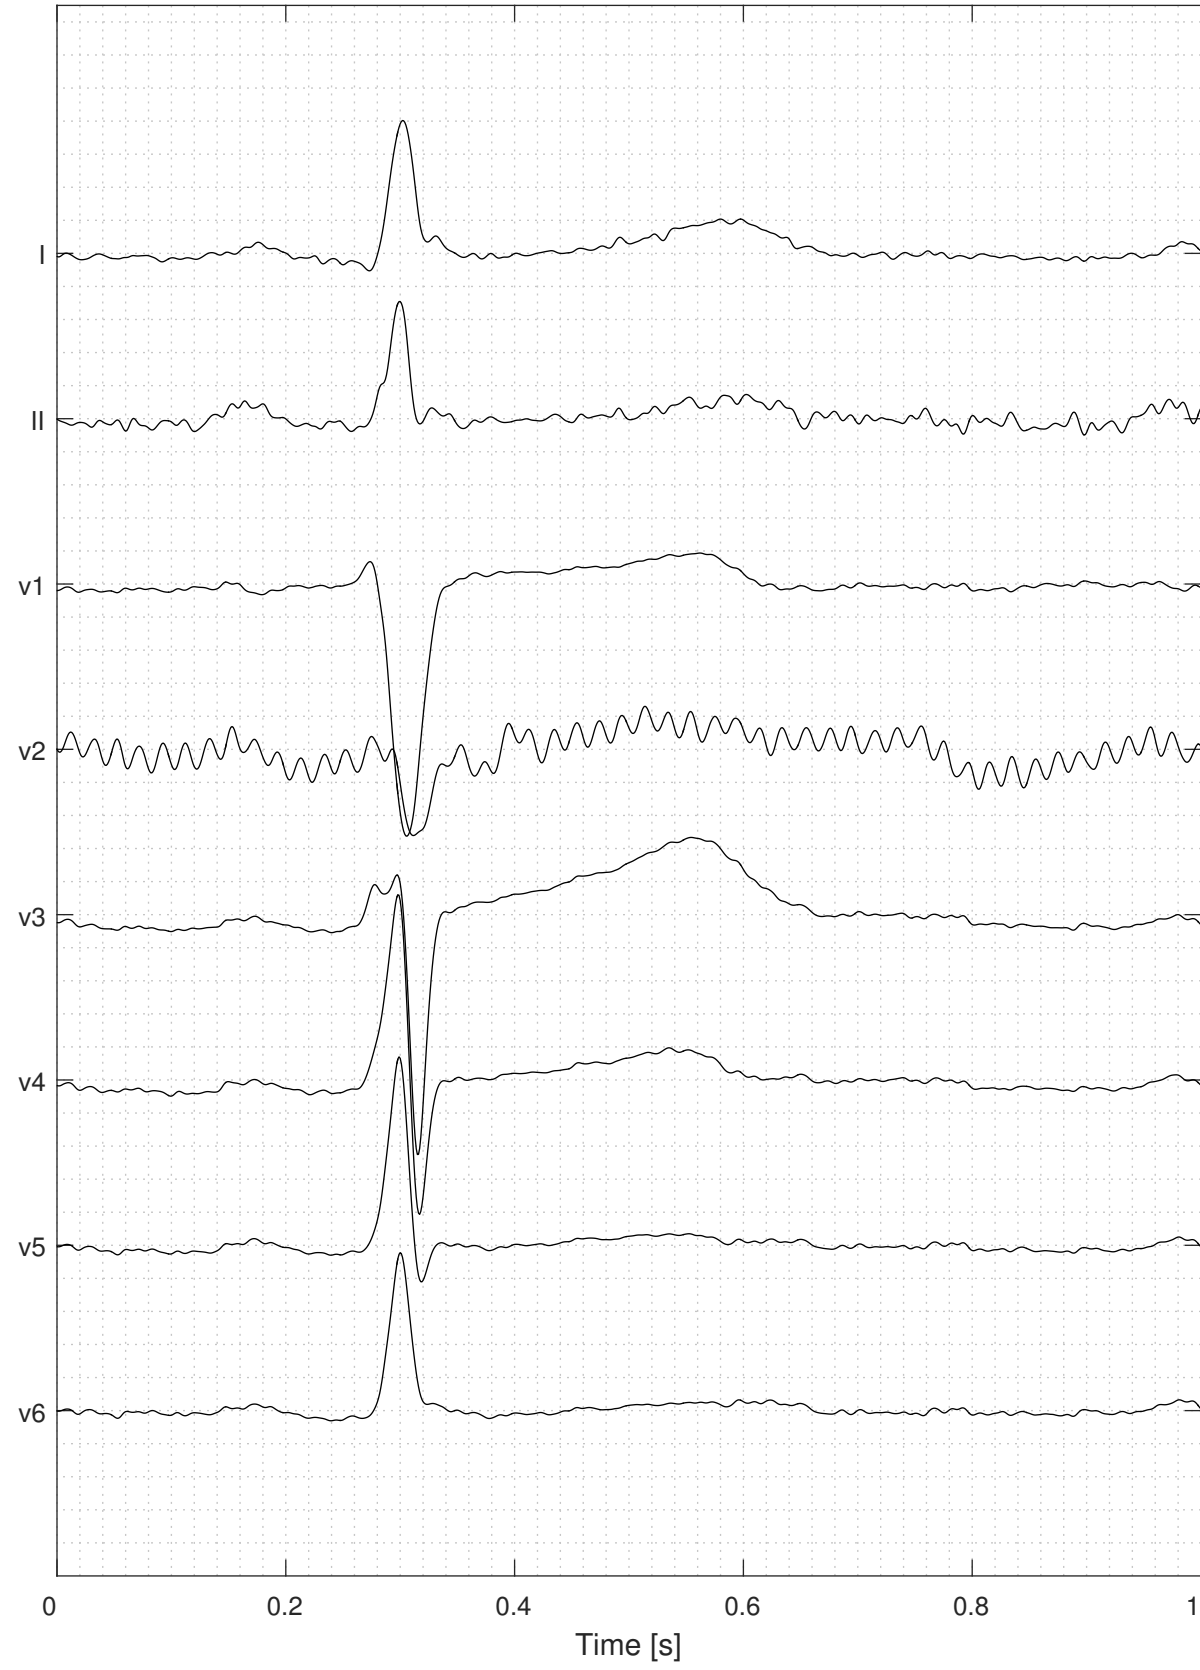

High RR, Complex #: 184

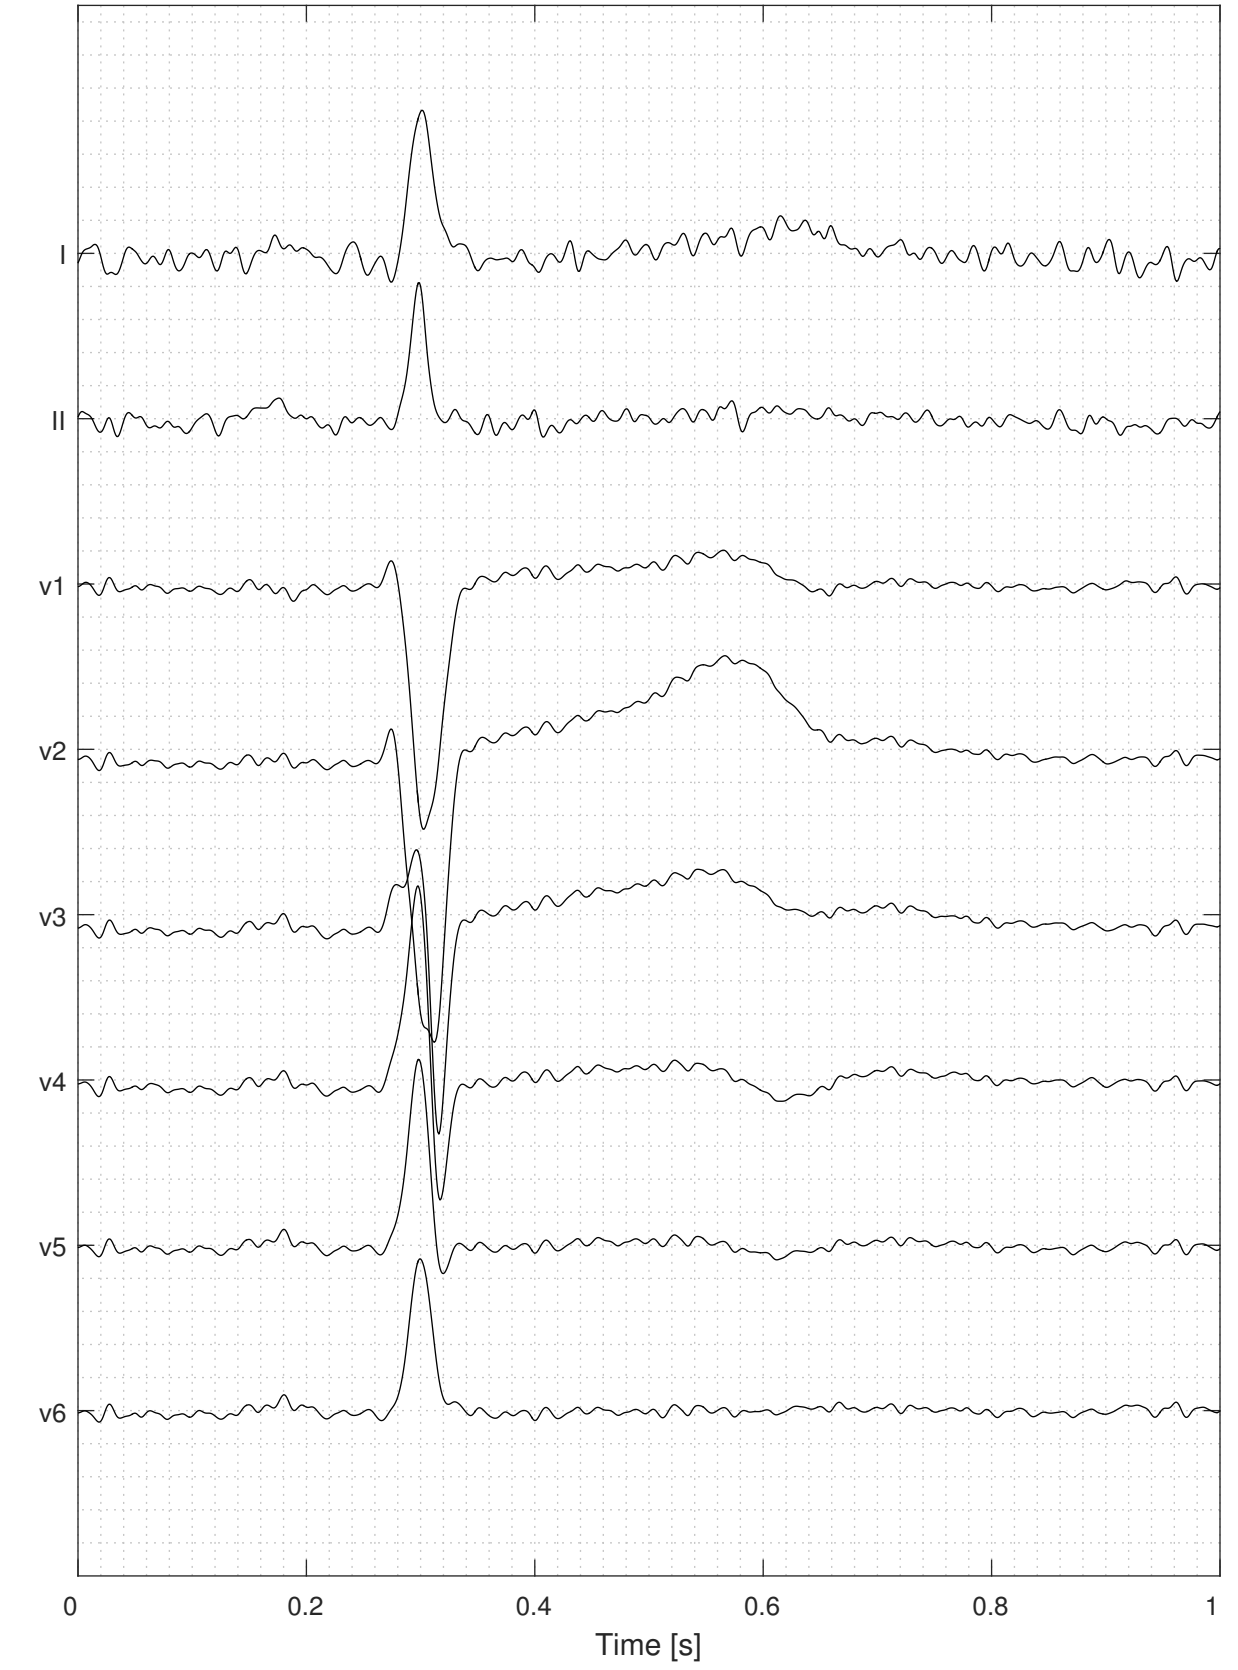

Patient 122

Low RR, Complex #: 130

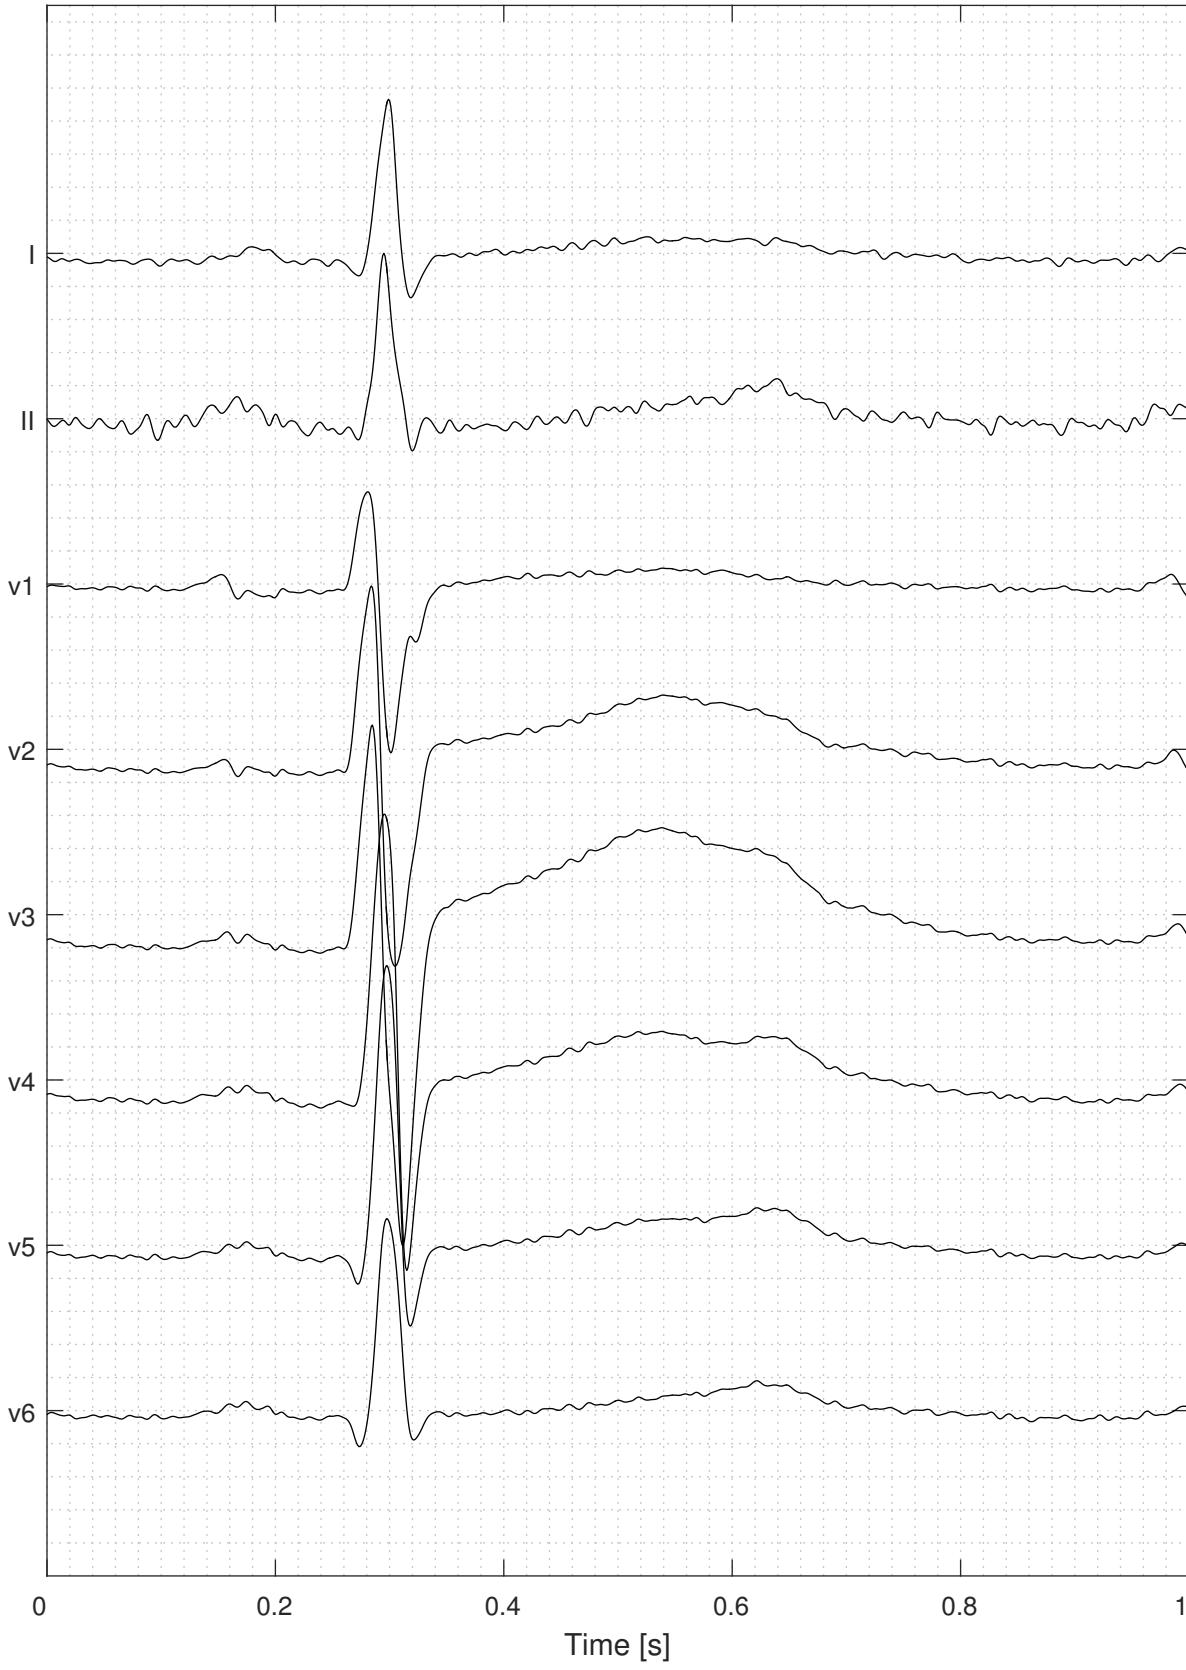

Mid RR, Complex #: 314

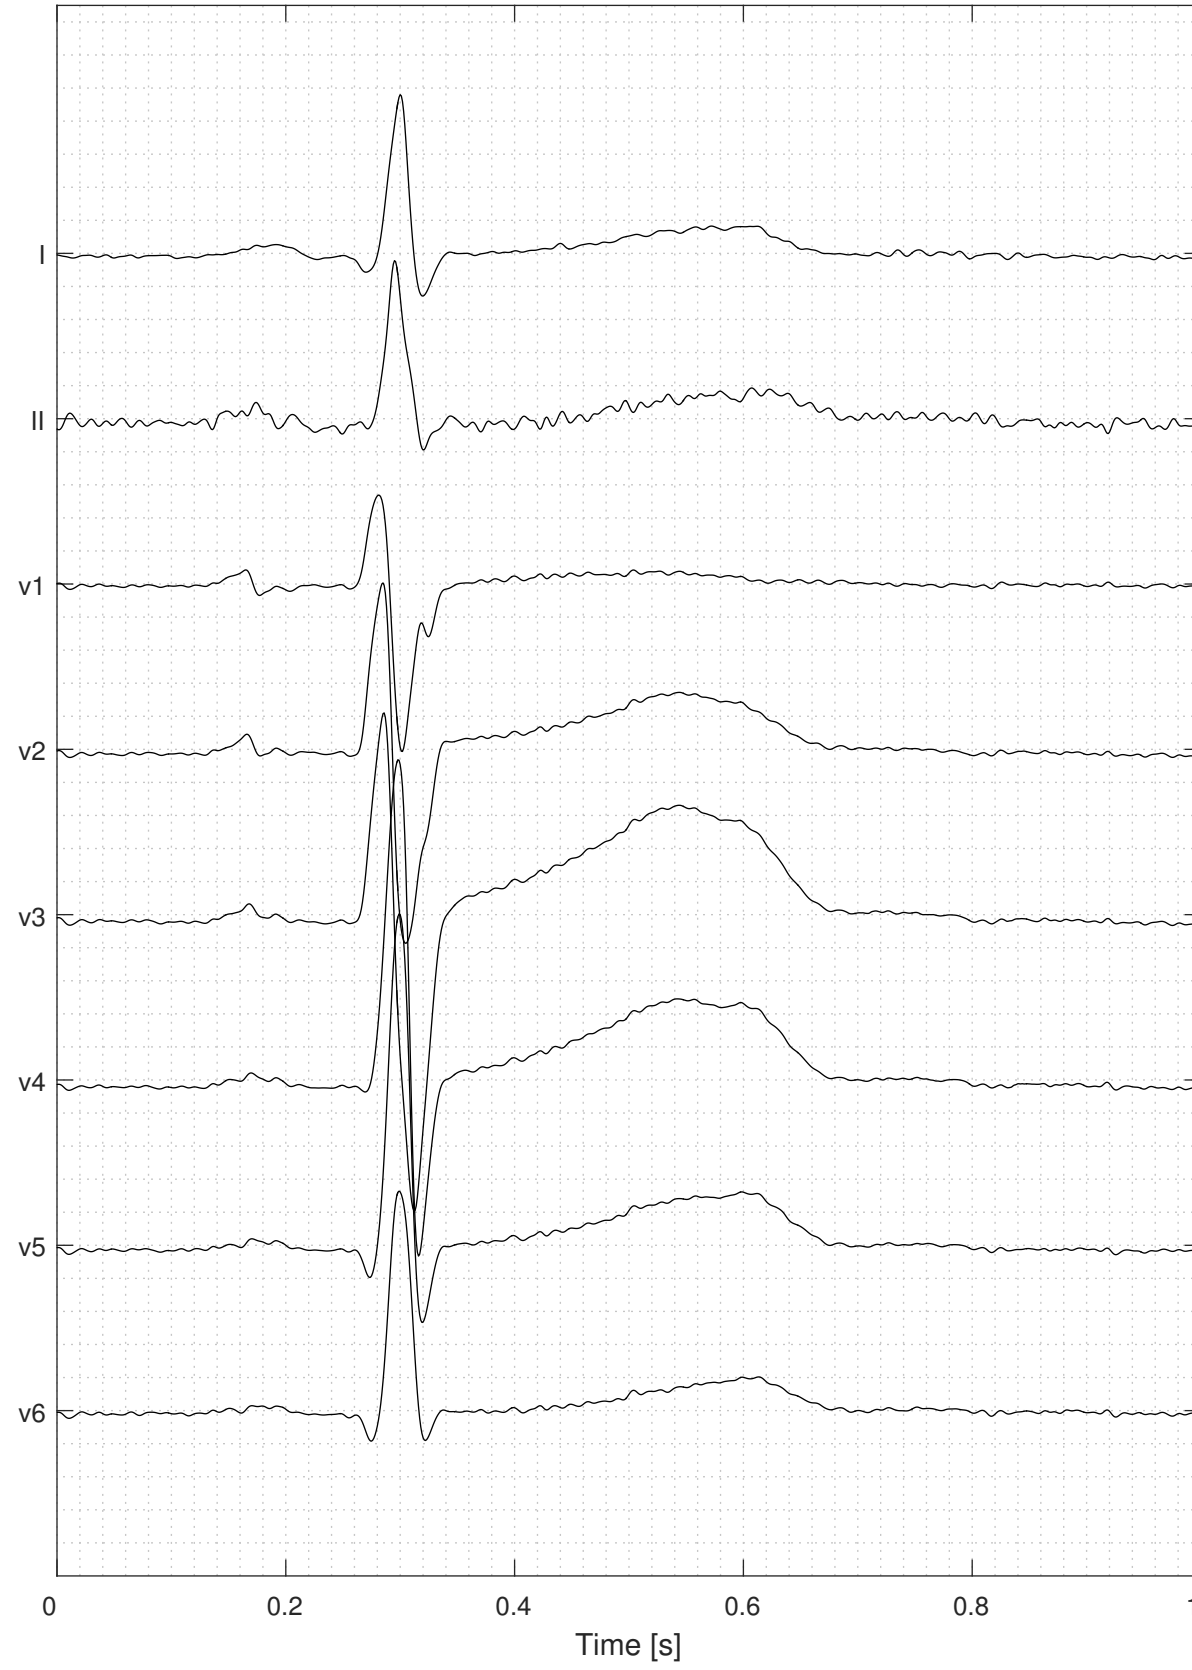

High RR, Complex #: 70

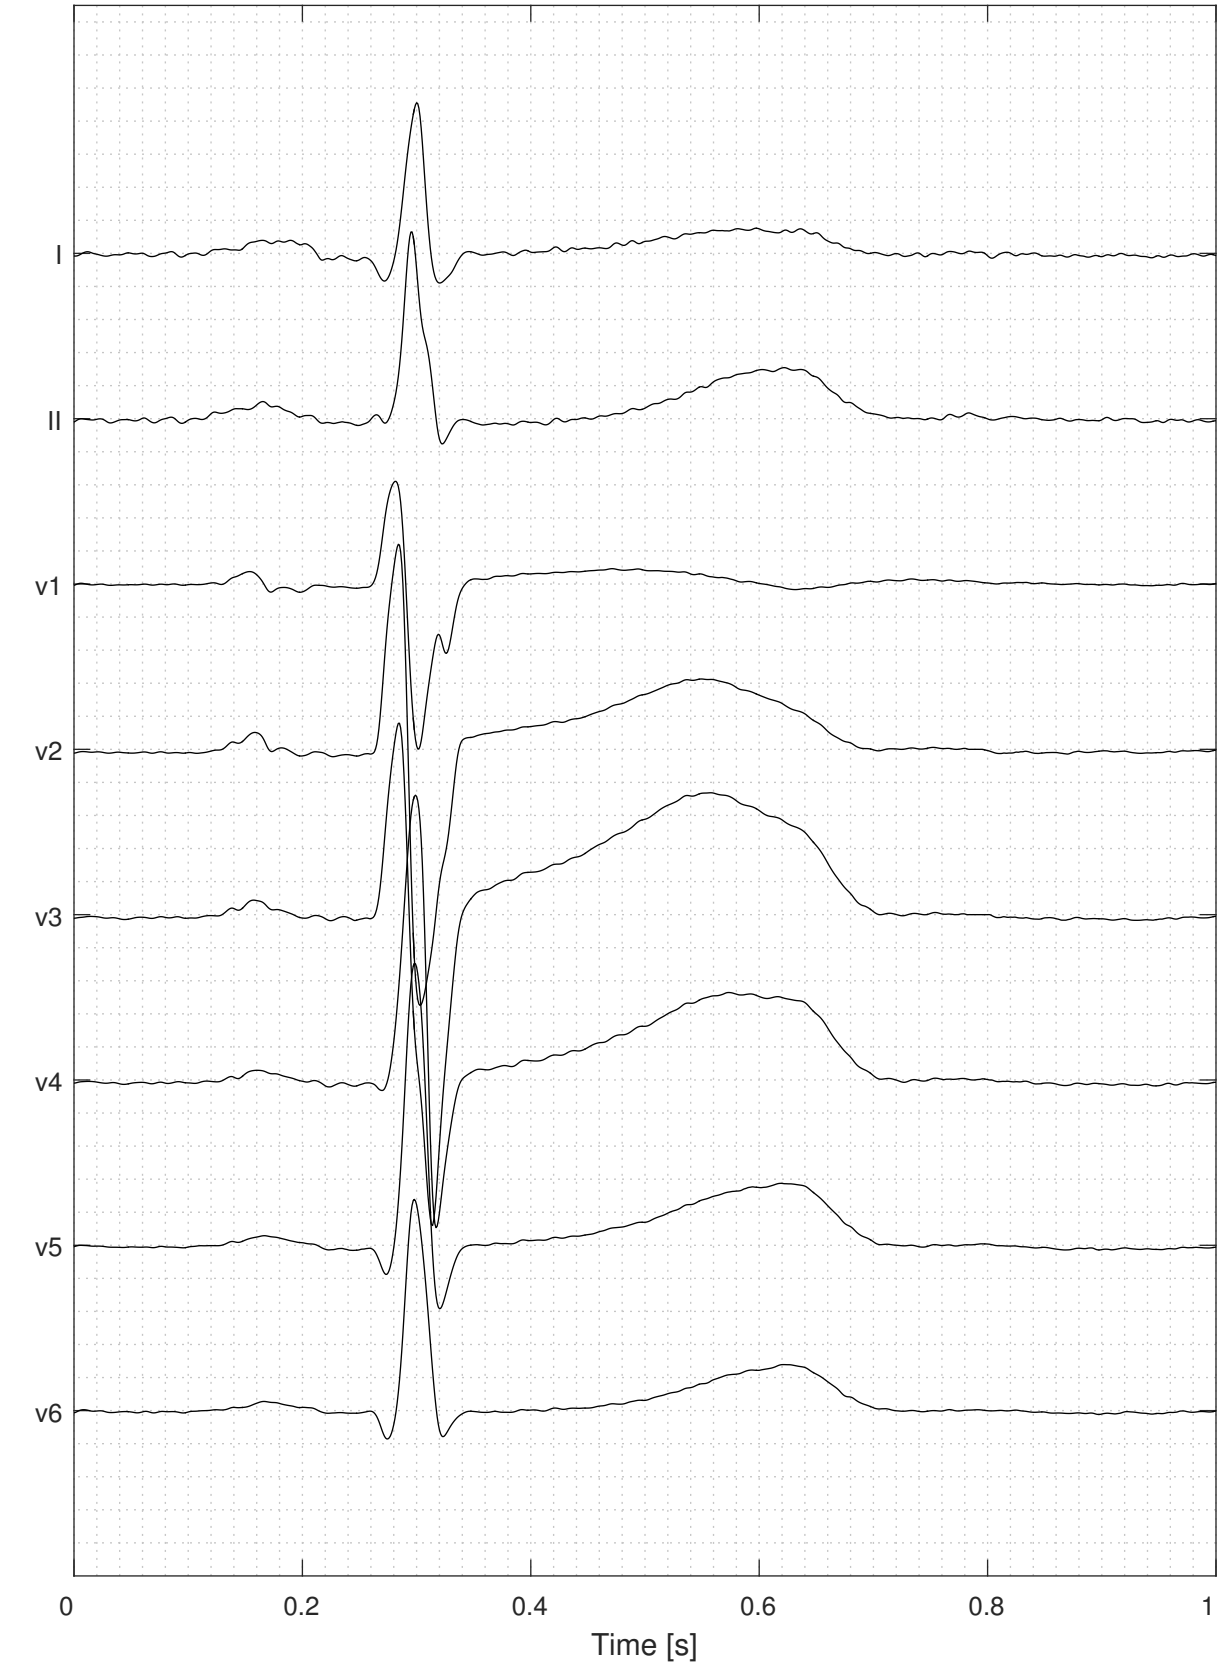

Patient 123

Low RR, Complex #: 331

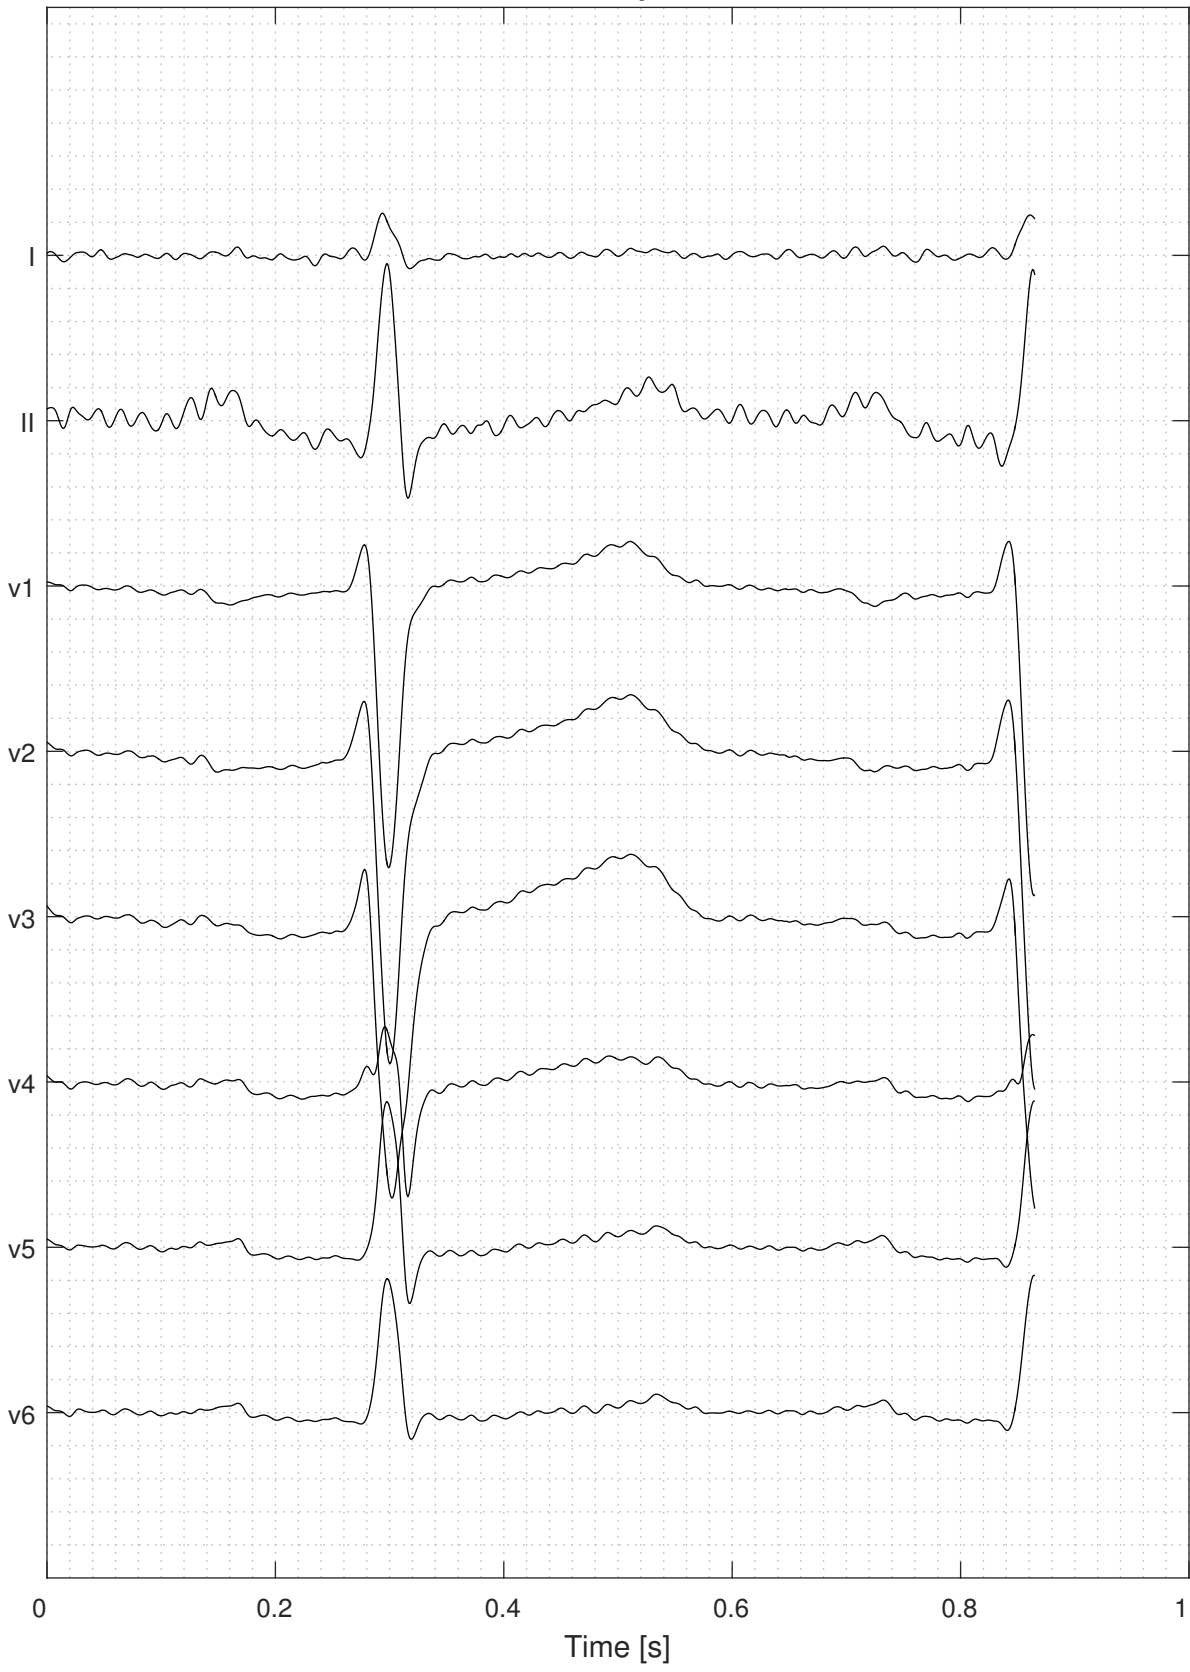

Mid RR, Complex #: 322

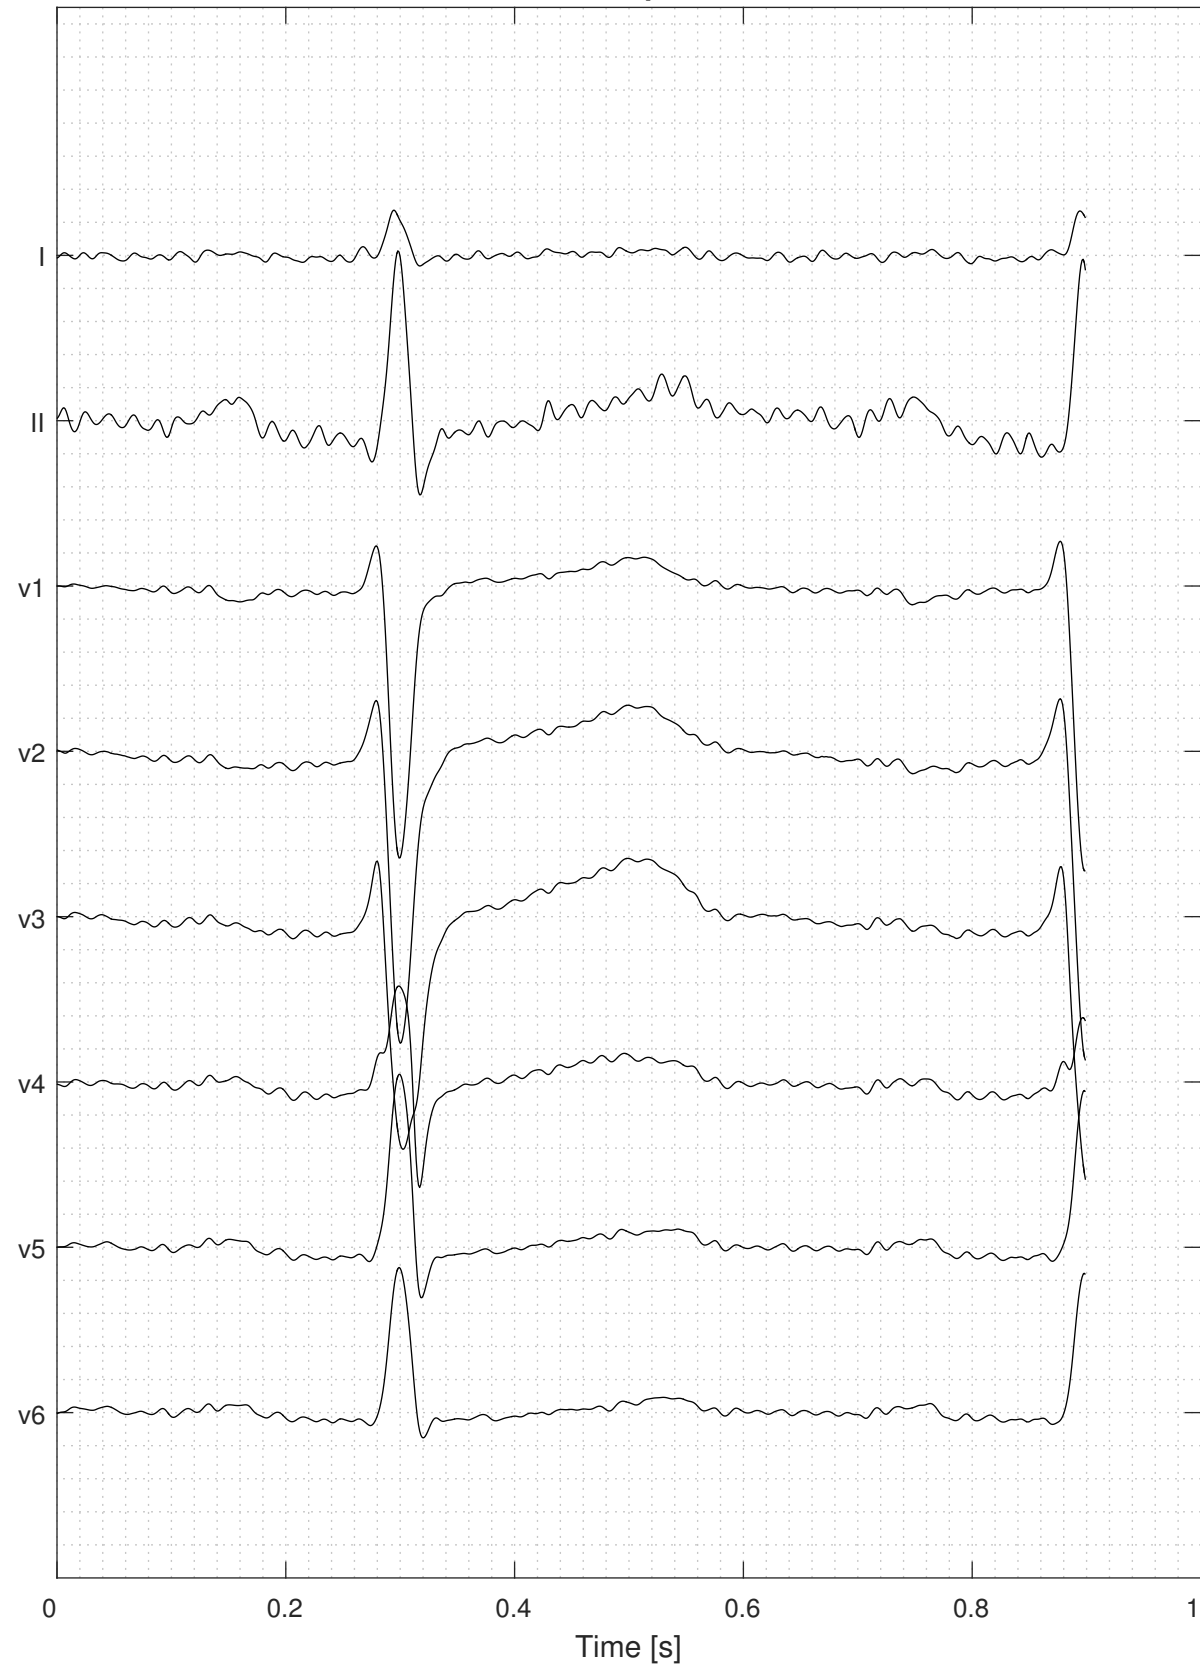

High RR, Complex #: 68

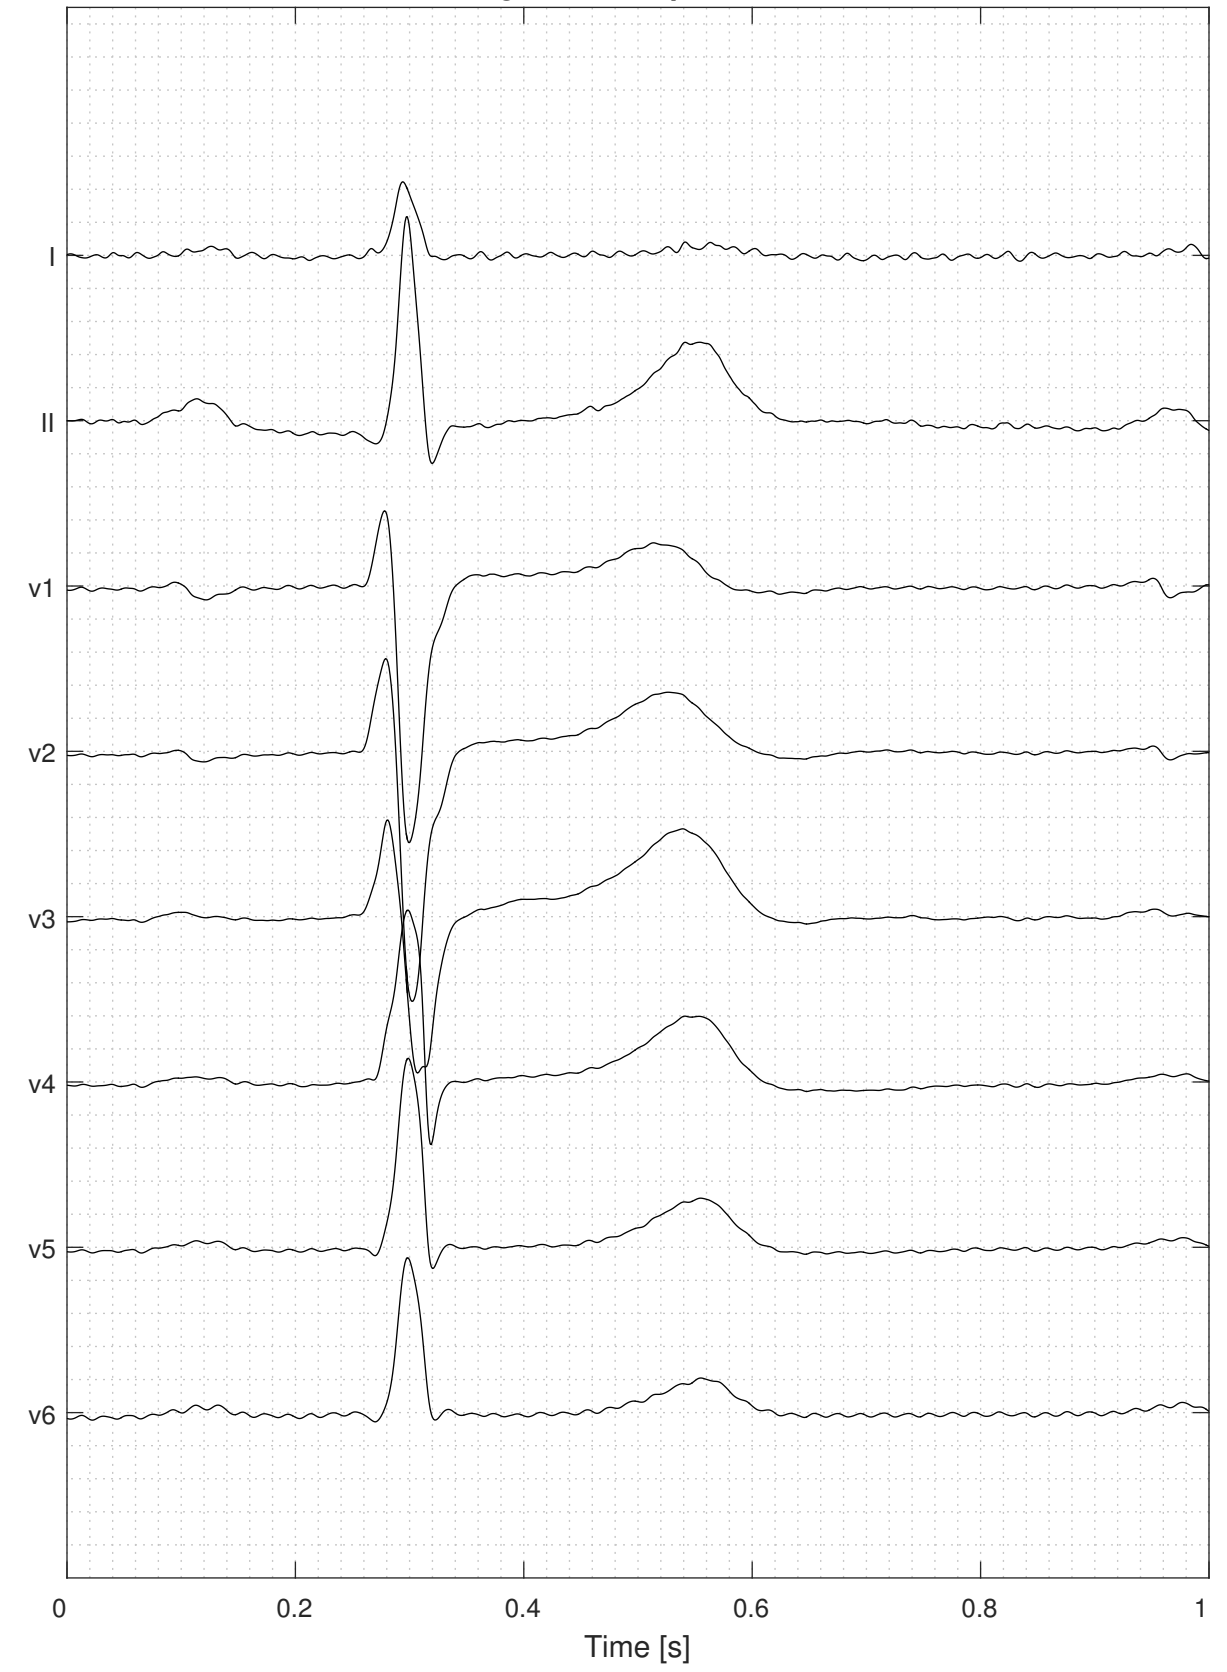

Patient 124

Low RR, Complex #: 139

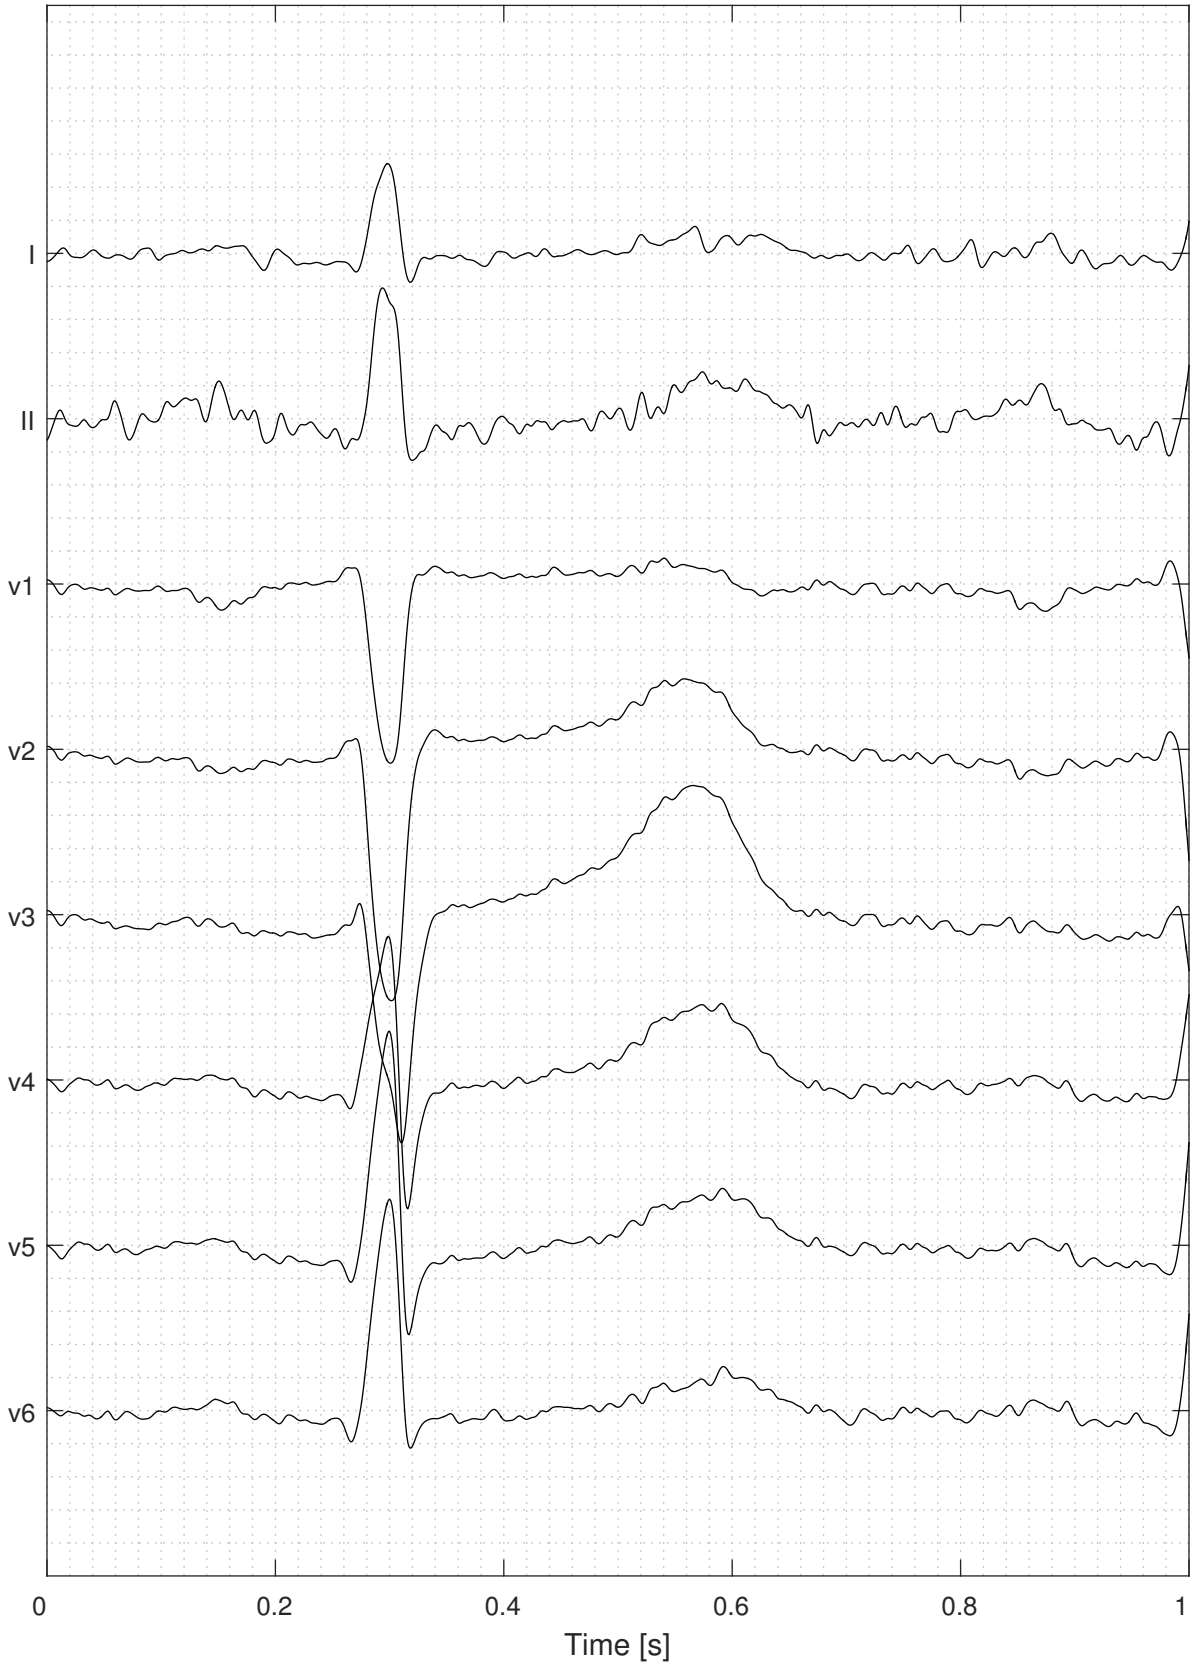

Mid RR, Complex #: 13

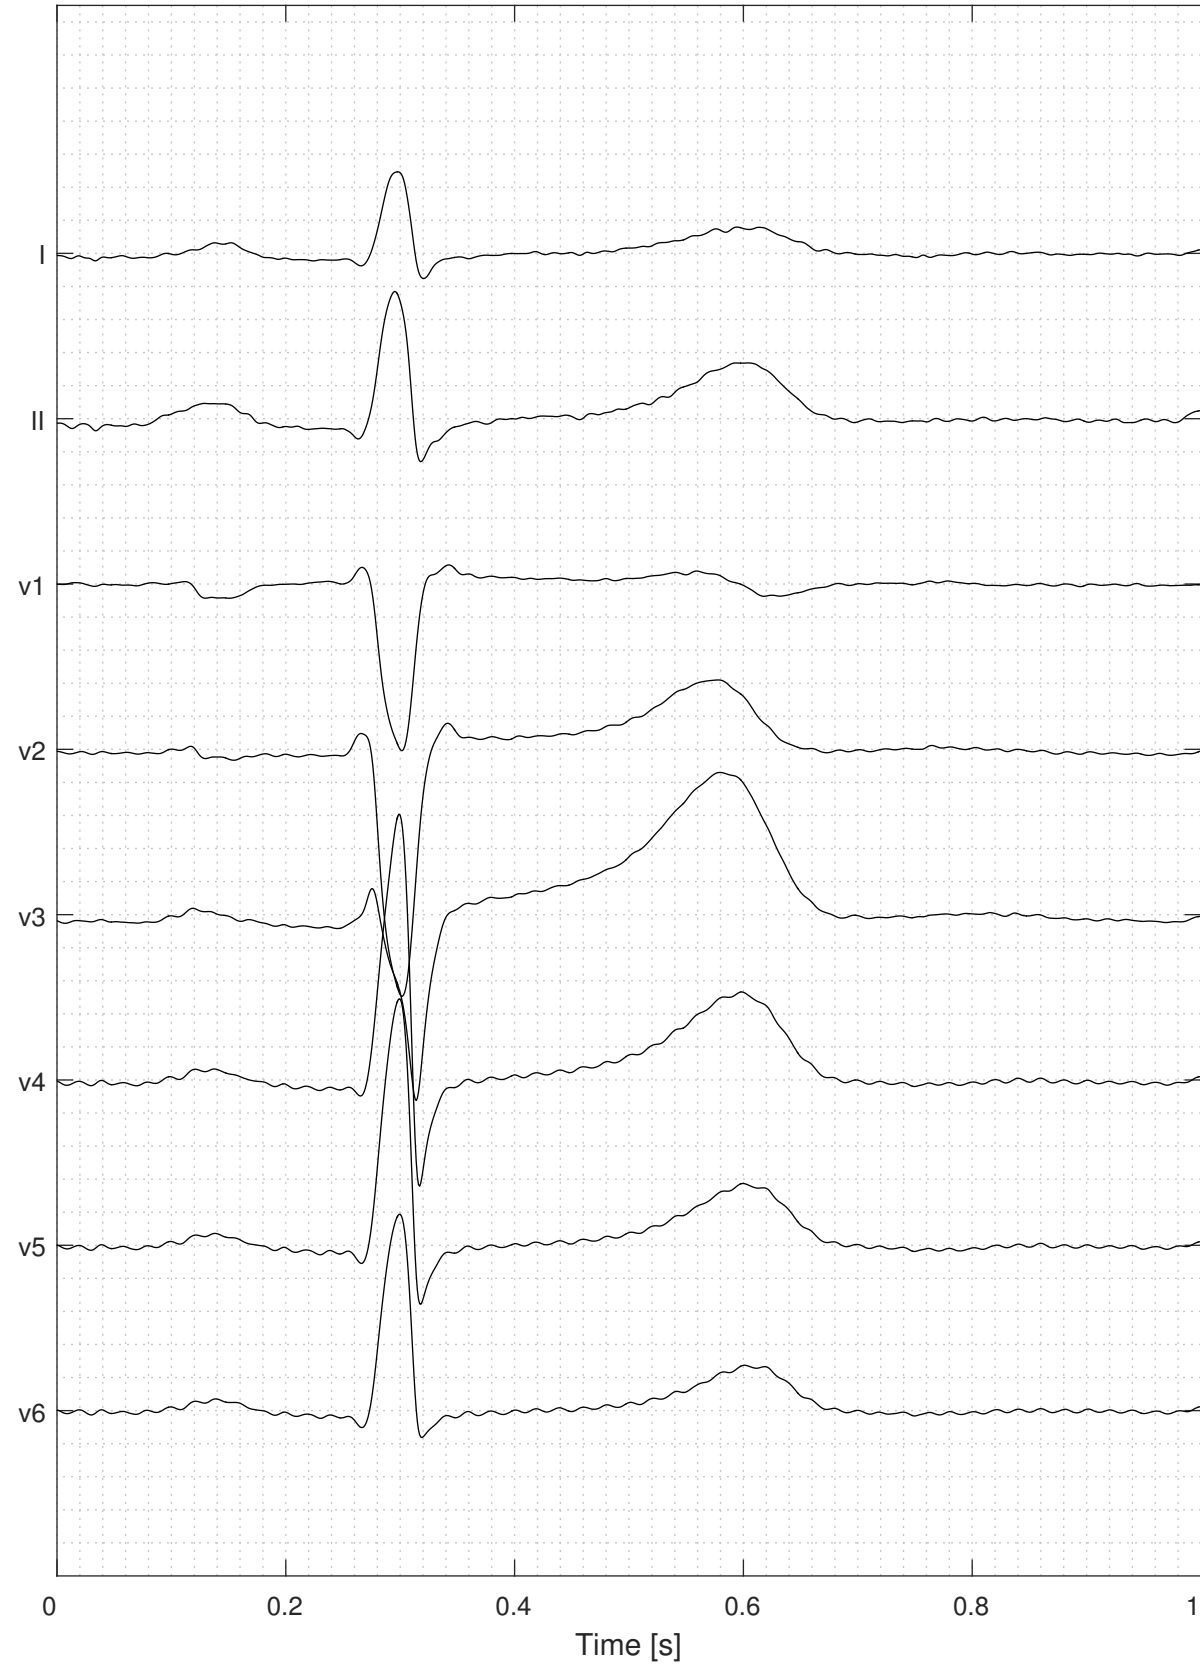

High RR, Complex #: 100

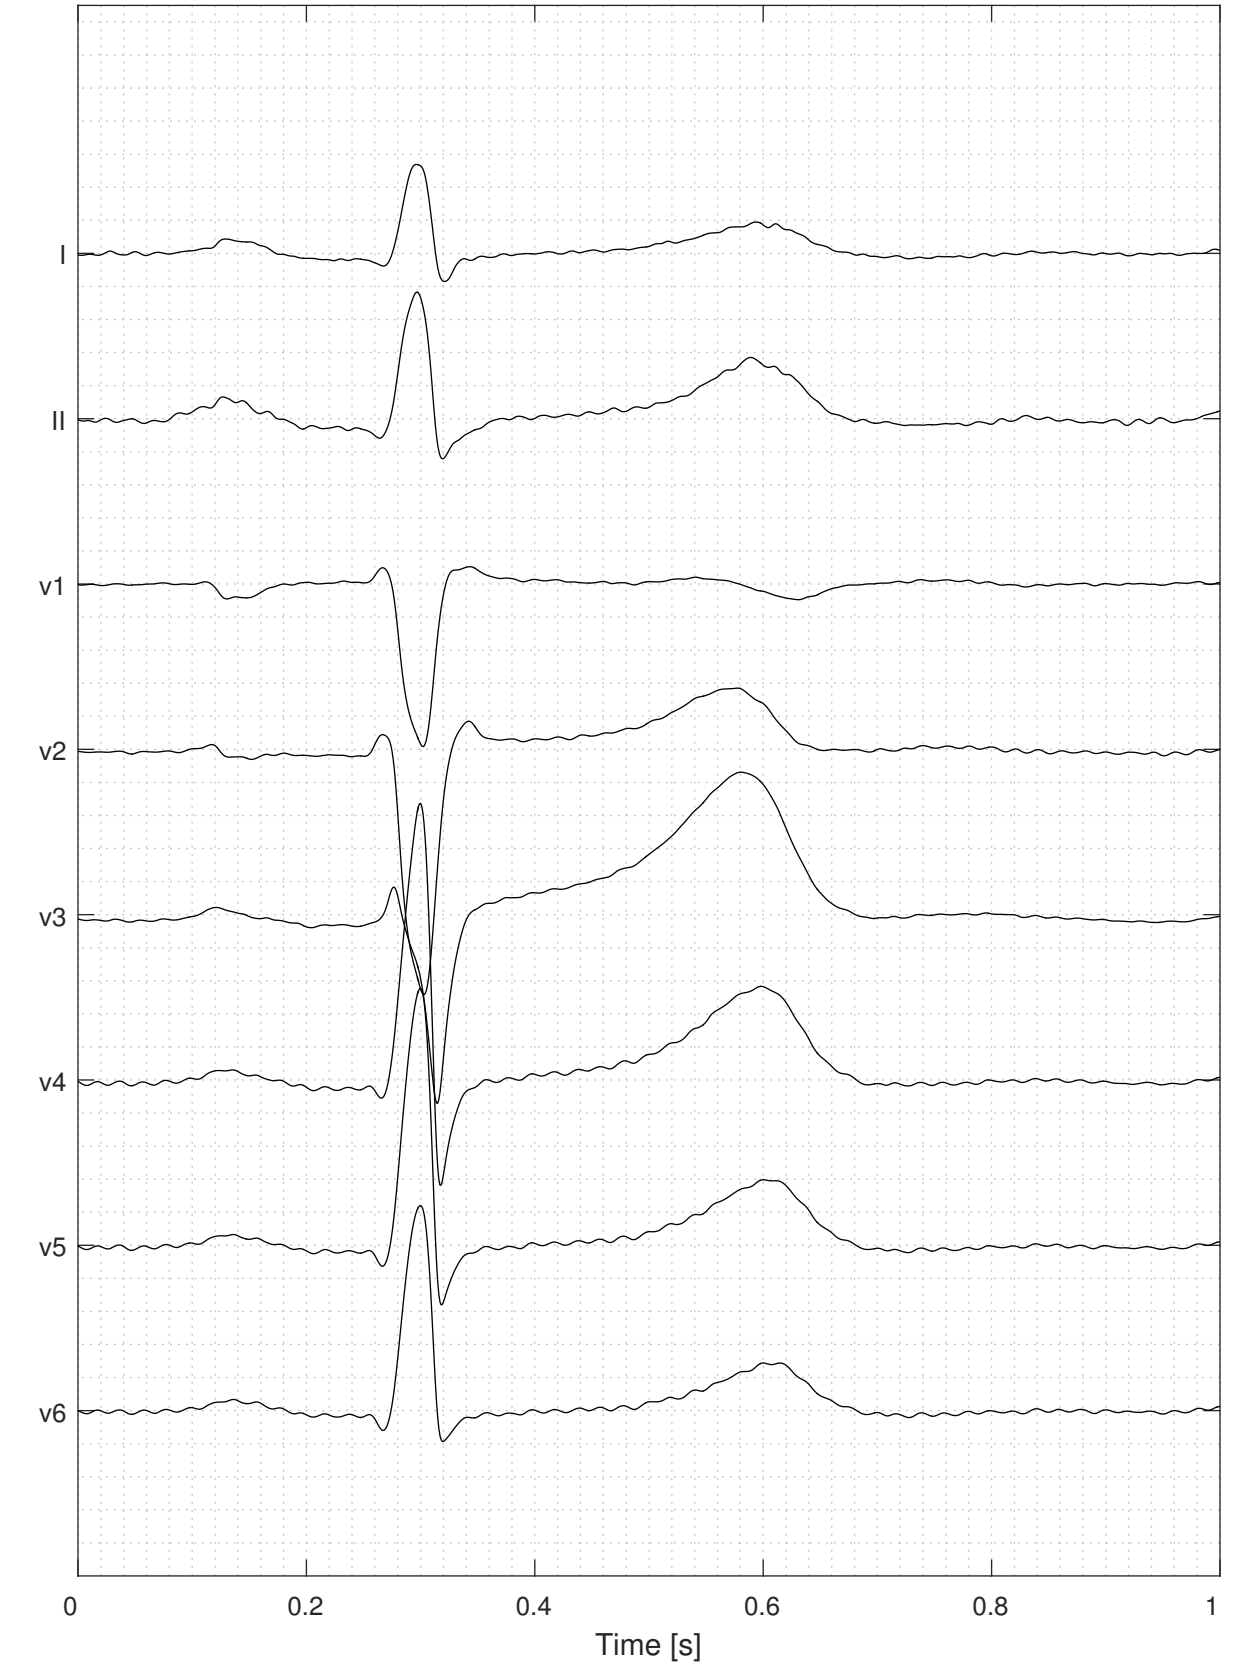

Patient 125

Low RR, Complex #: 188

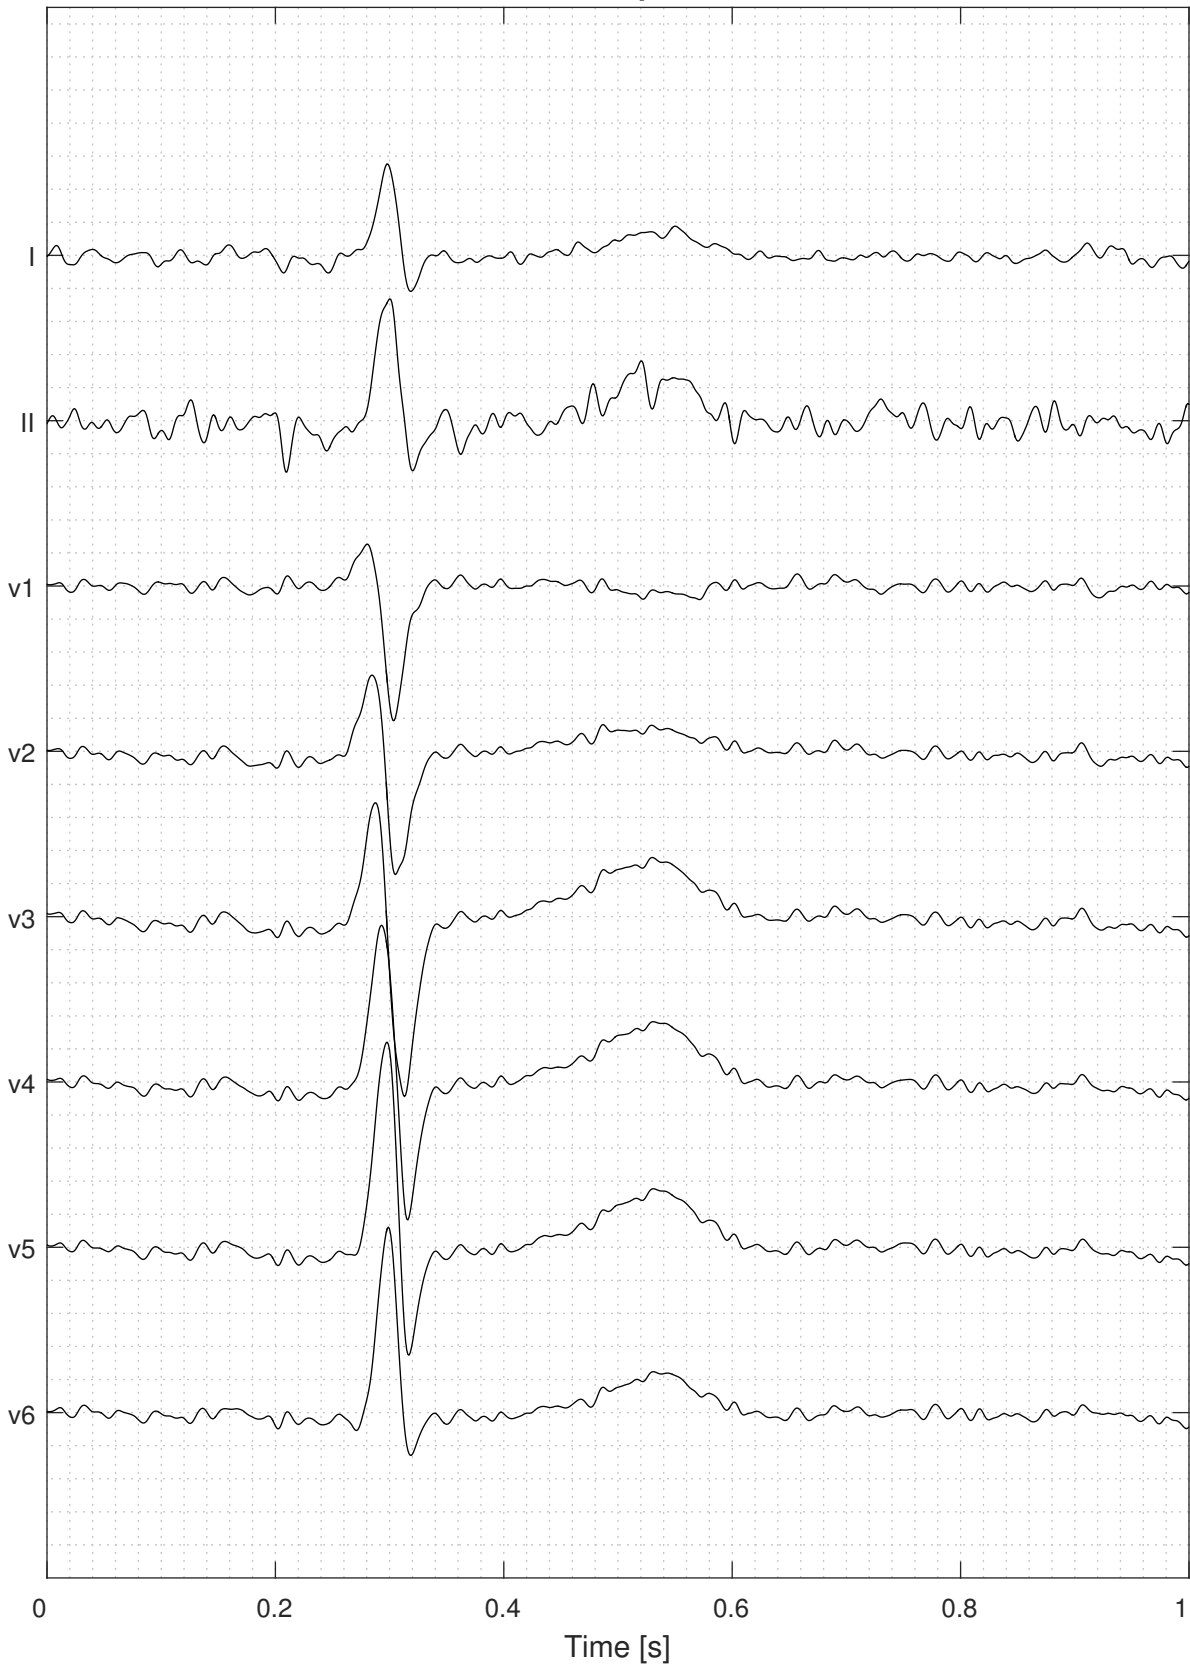

Mid RR, Complex #: 250

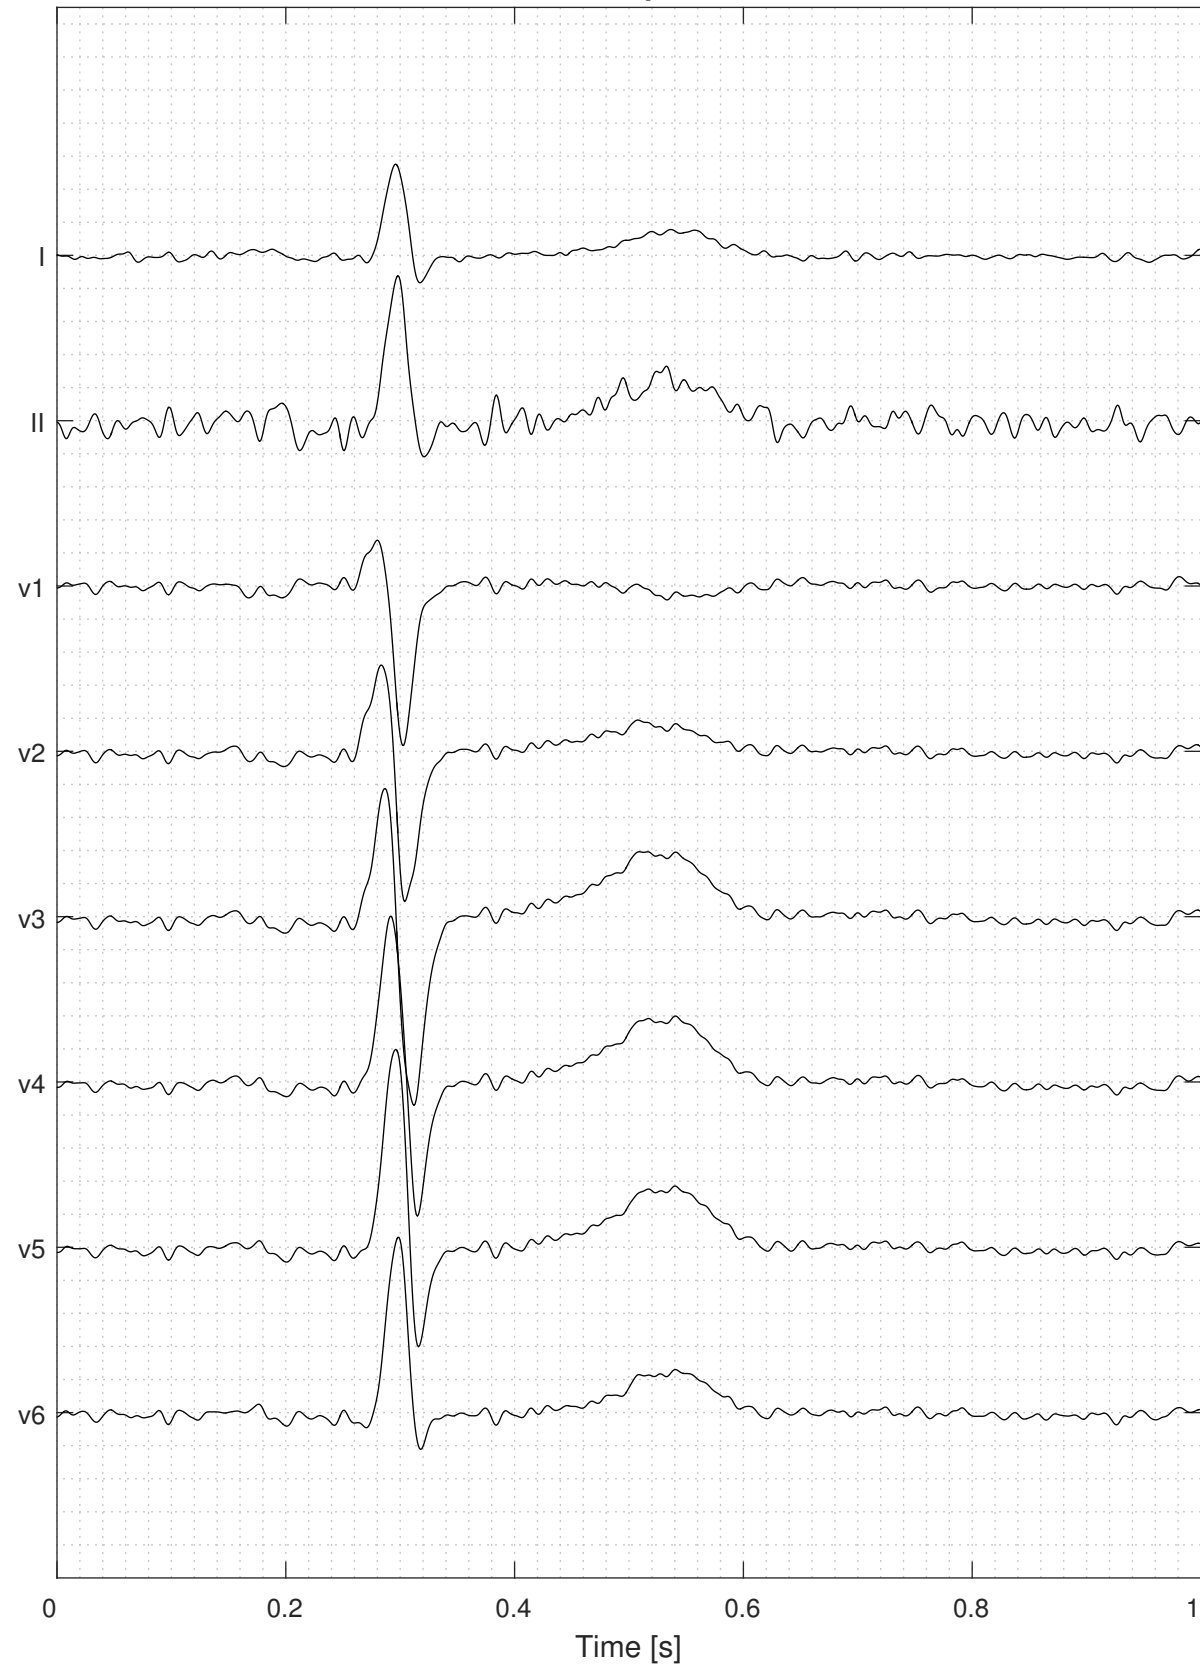

High RR, Complex #: 49

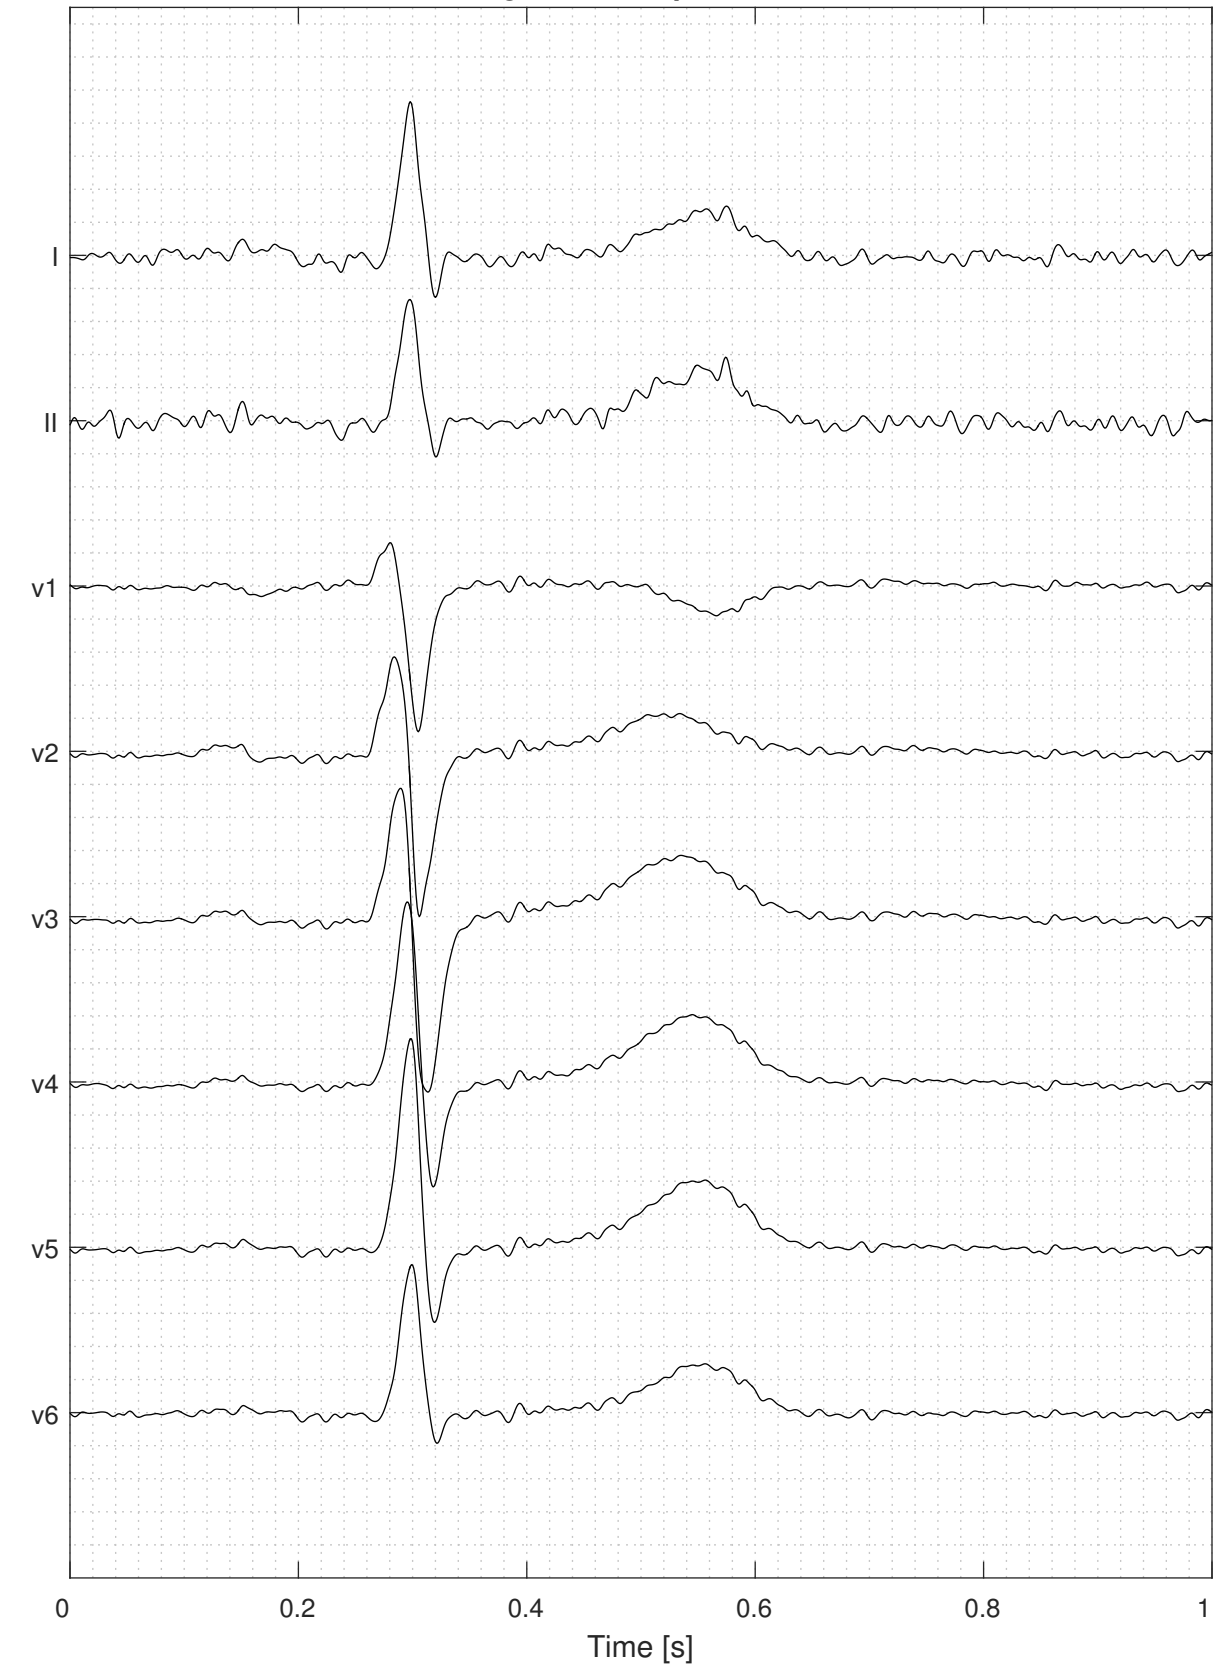

Patient 126

Low RR, Complex #: 284

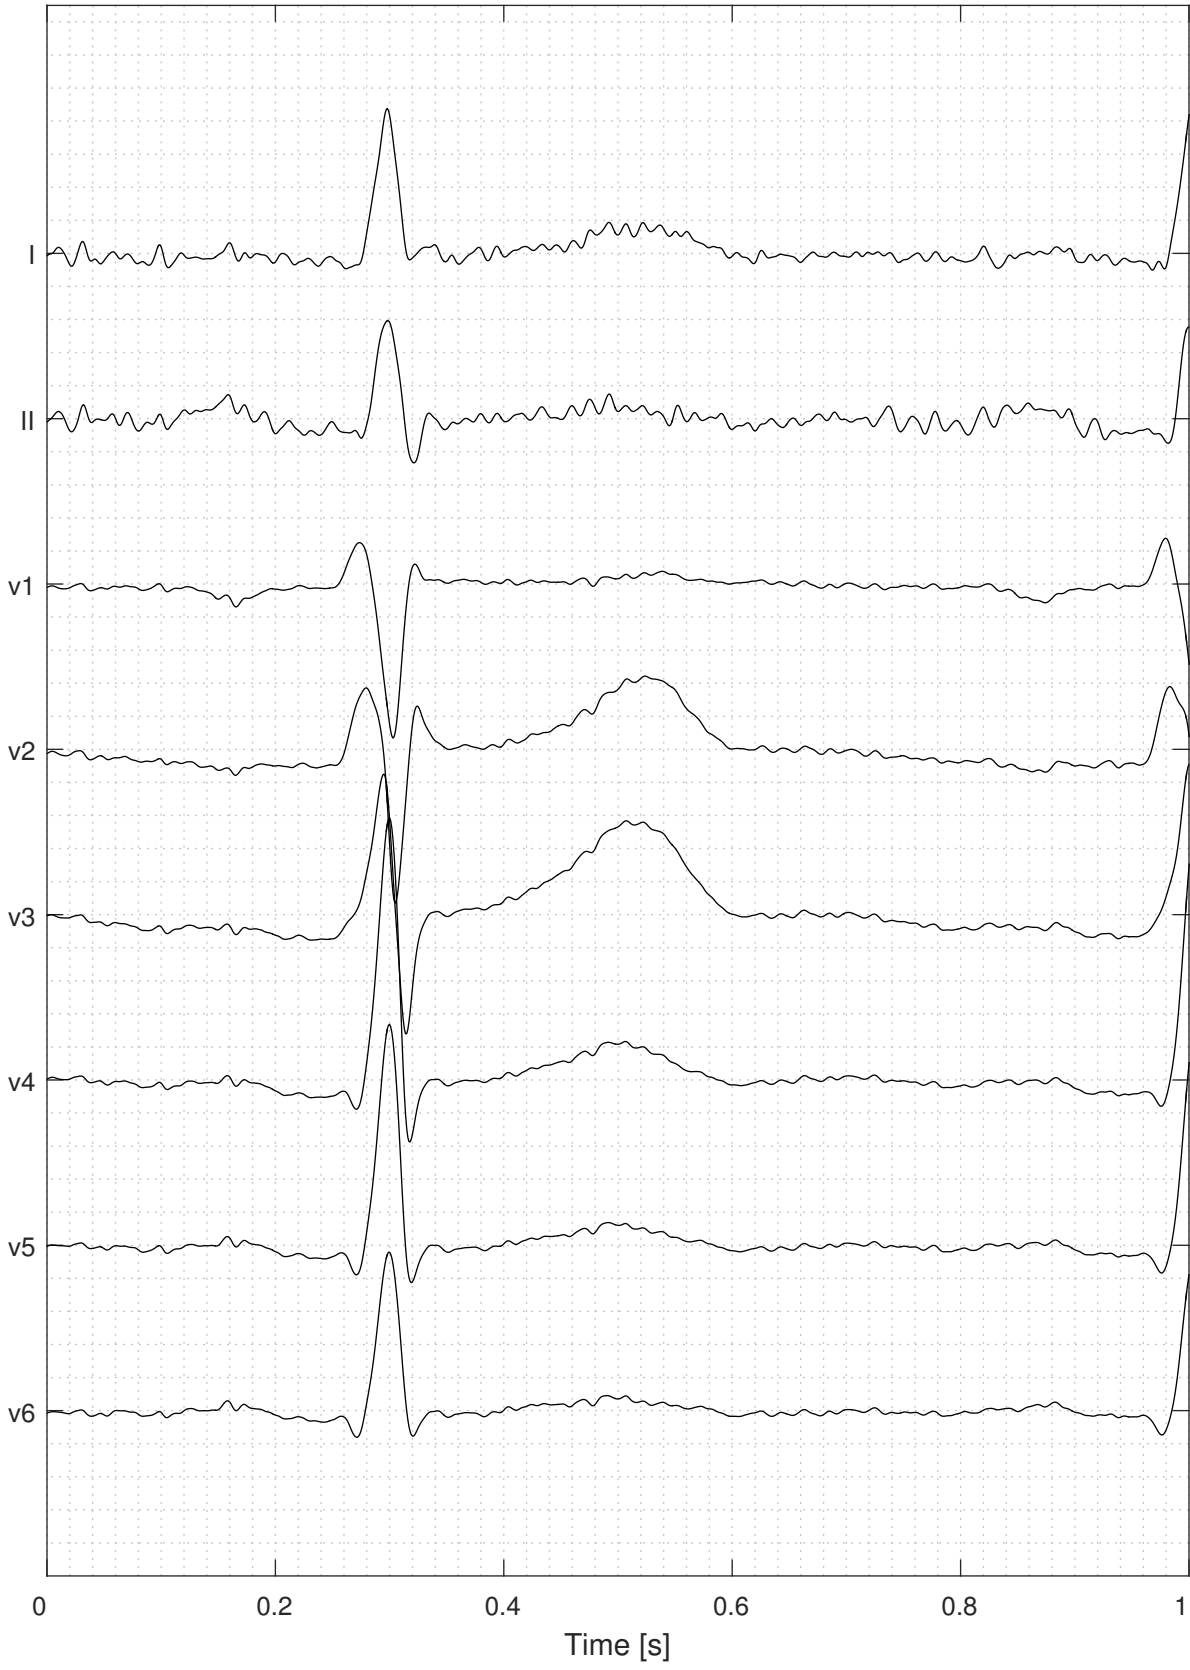

Mid RR, Complex #: 293

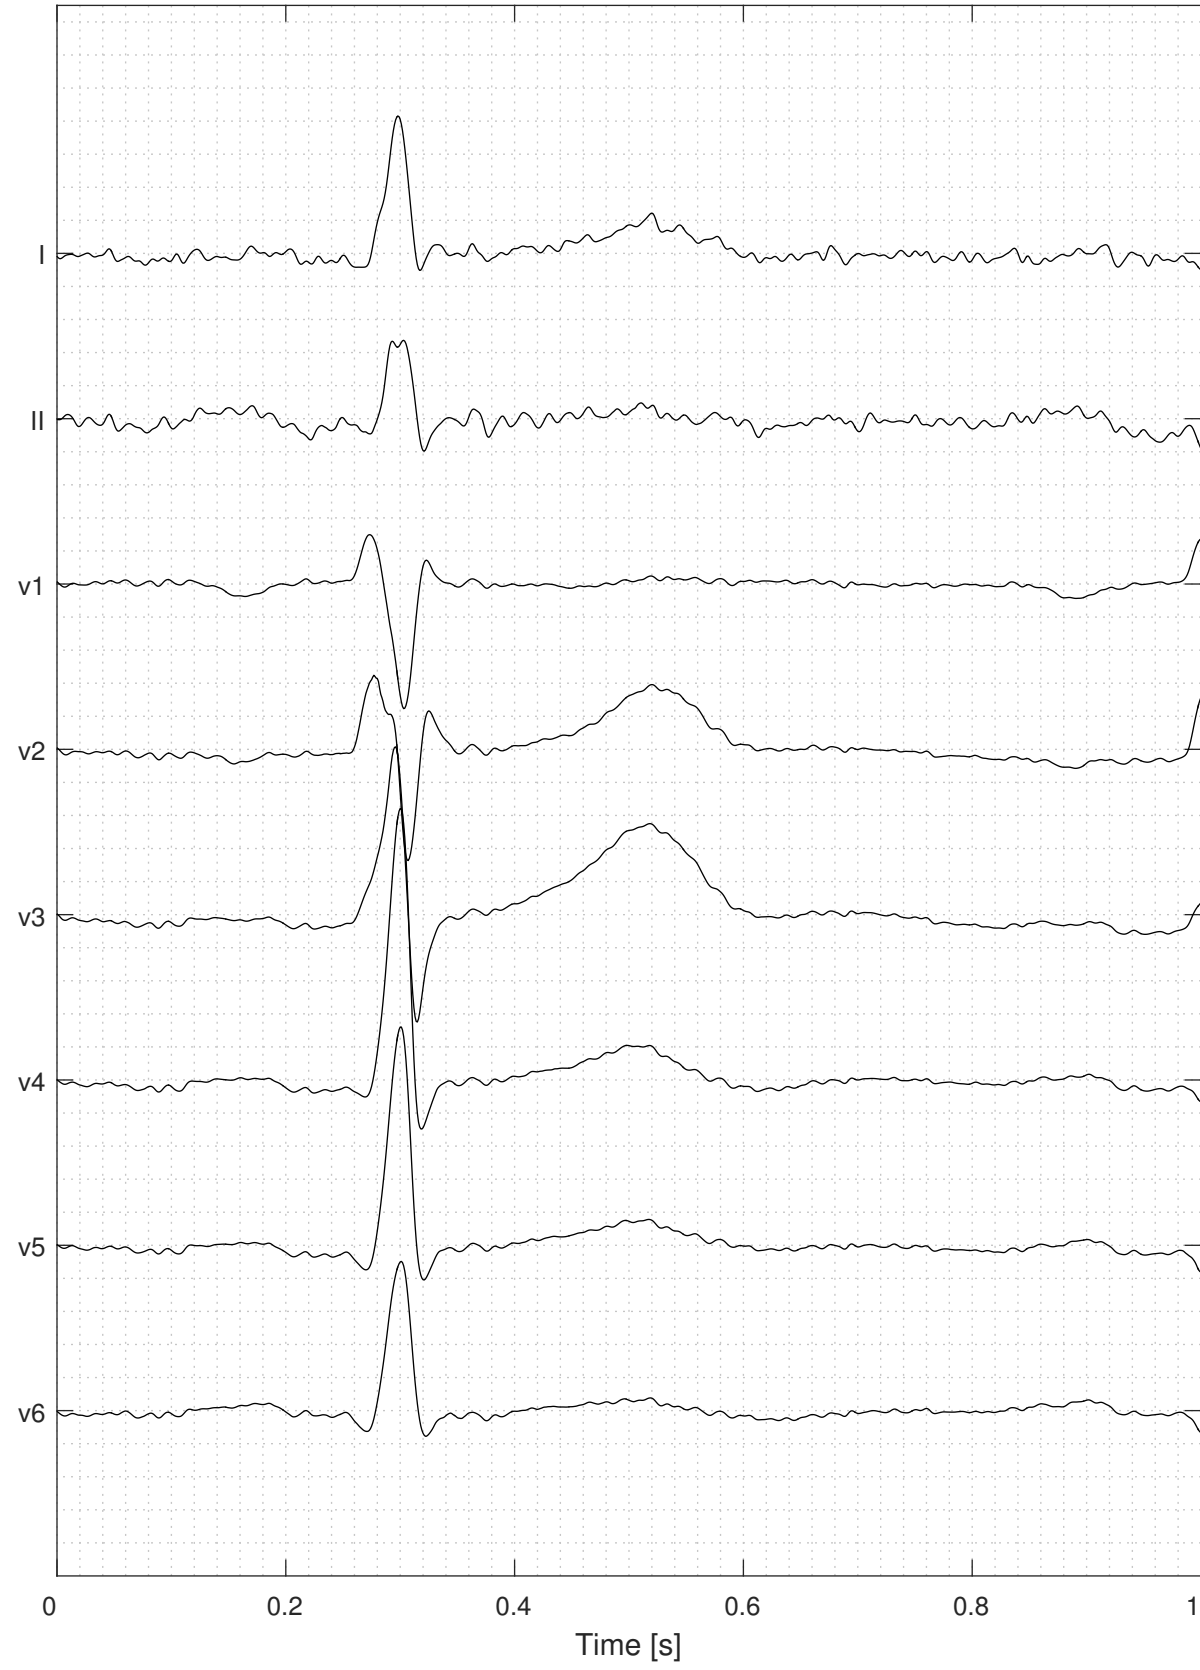

High RR, Complex #: 161

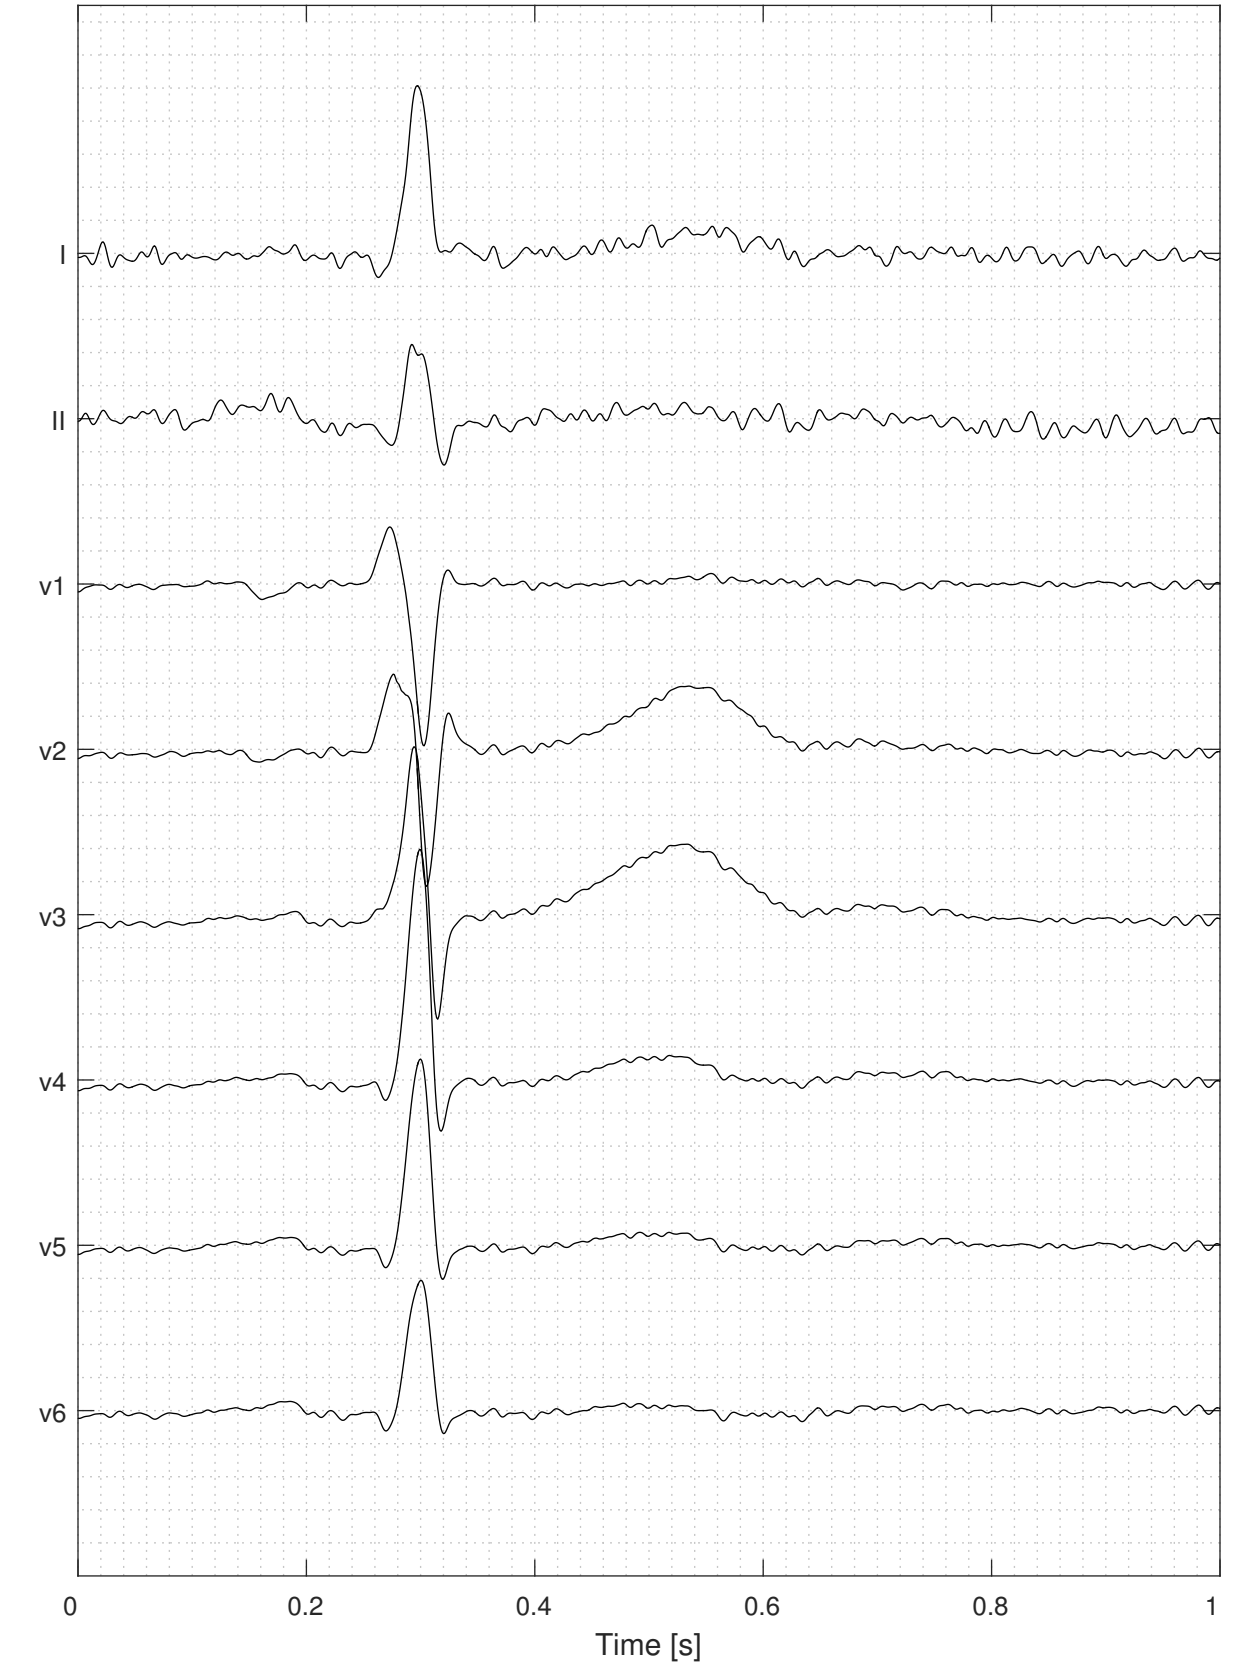

Patient 127

Low RR, Complex #: 117

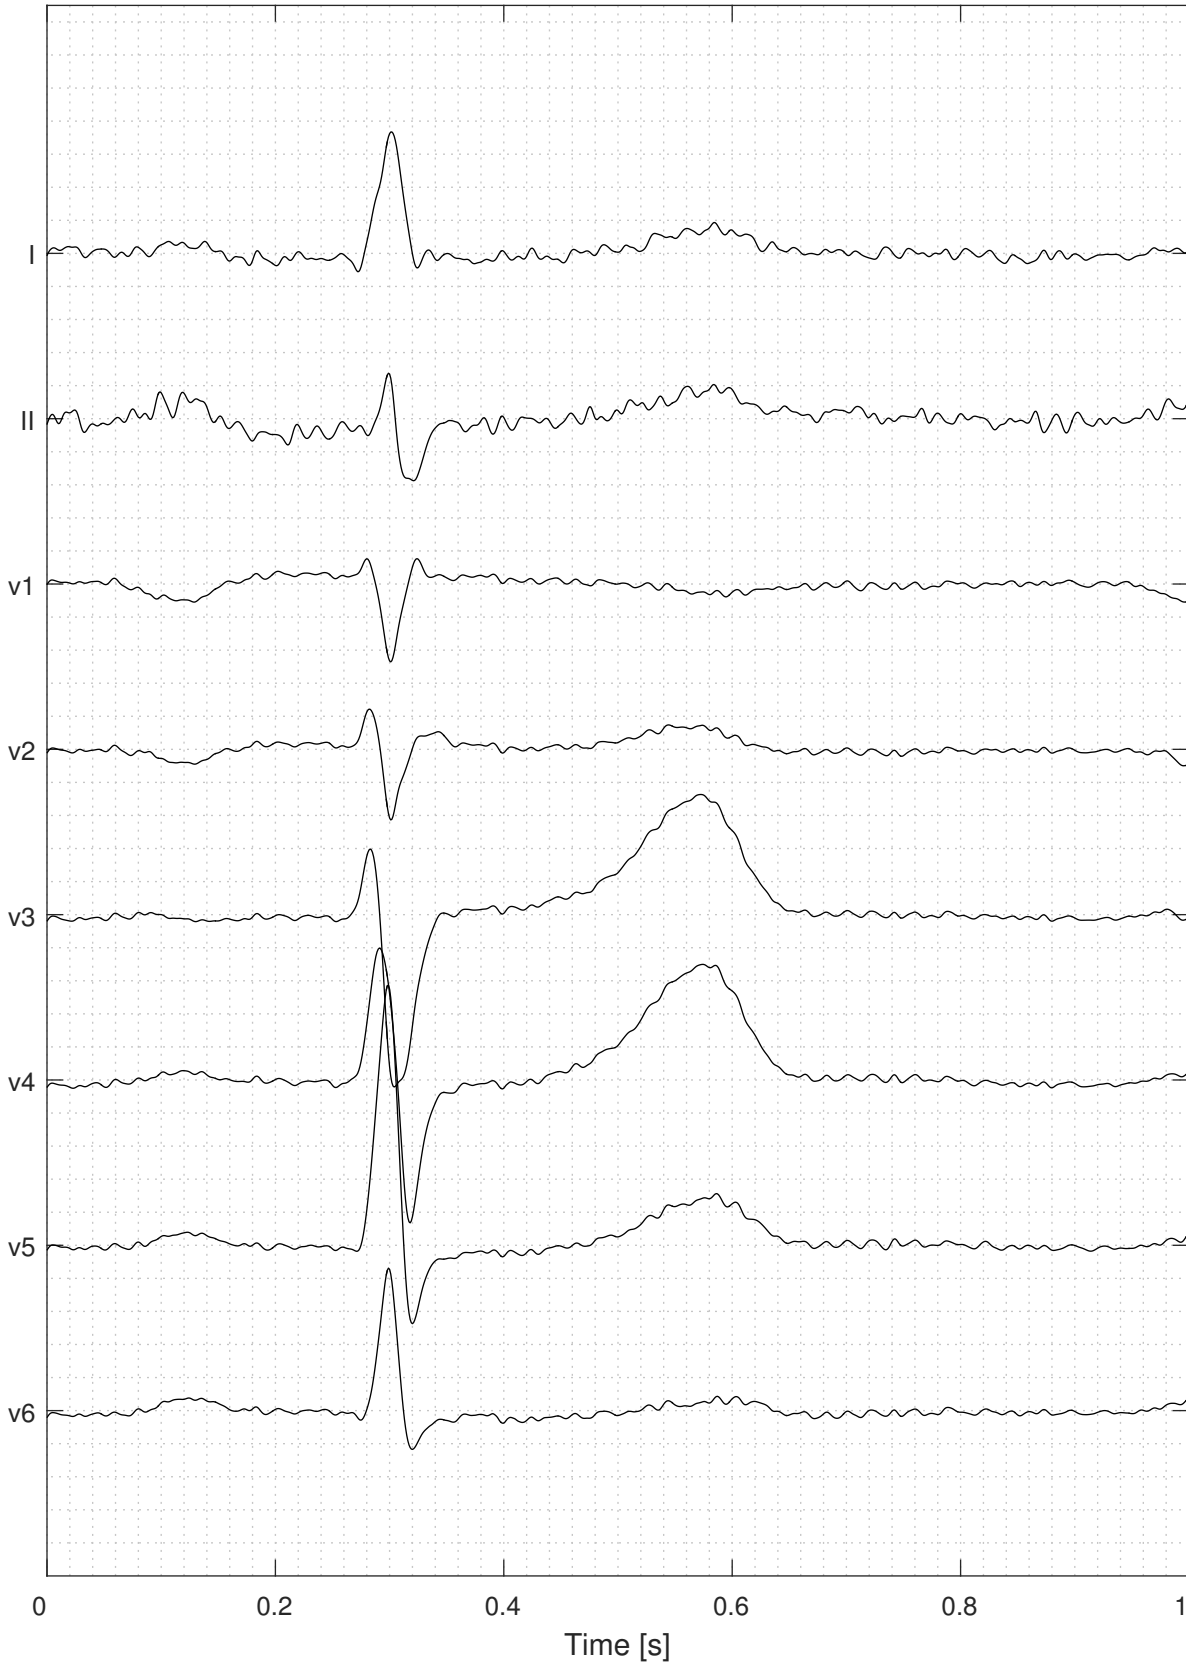

Mid RR, Complex #: 279

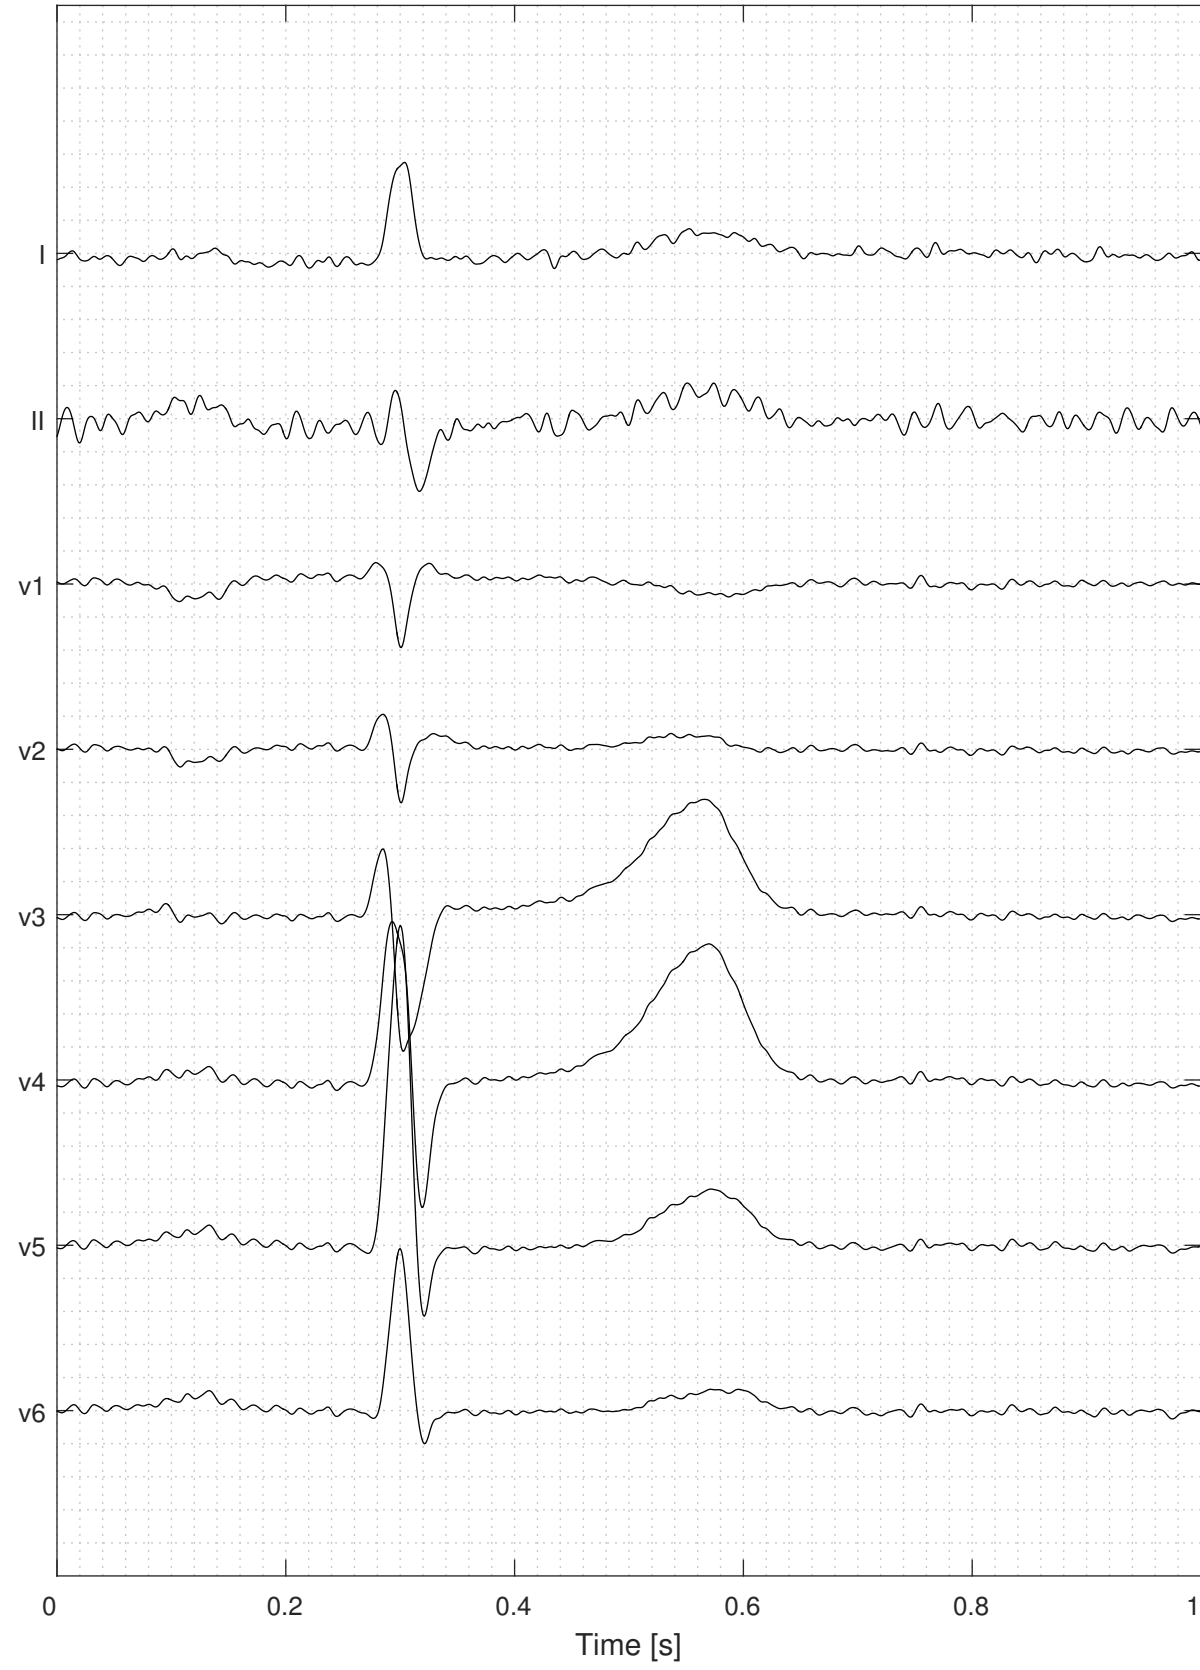

High RR, Complex #: 10

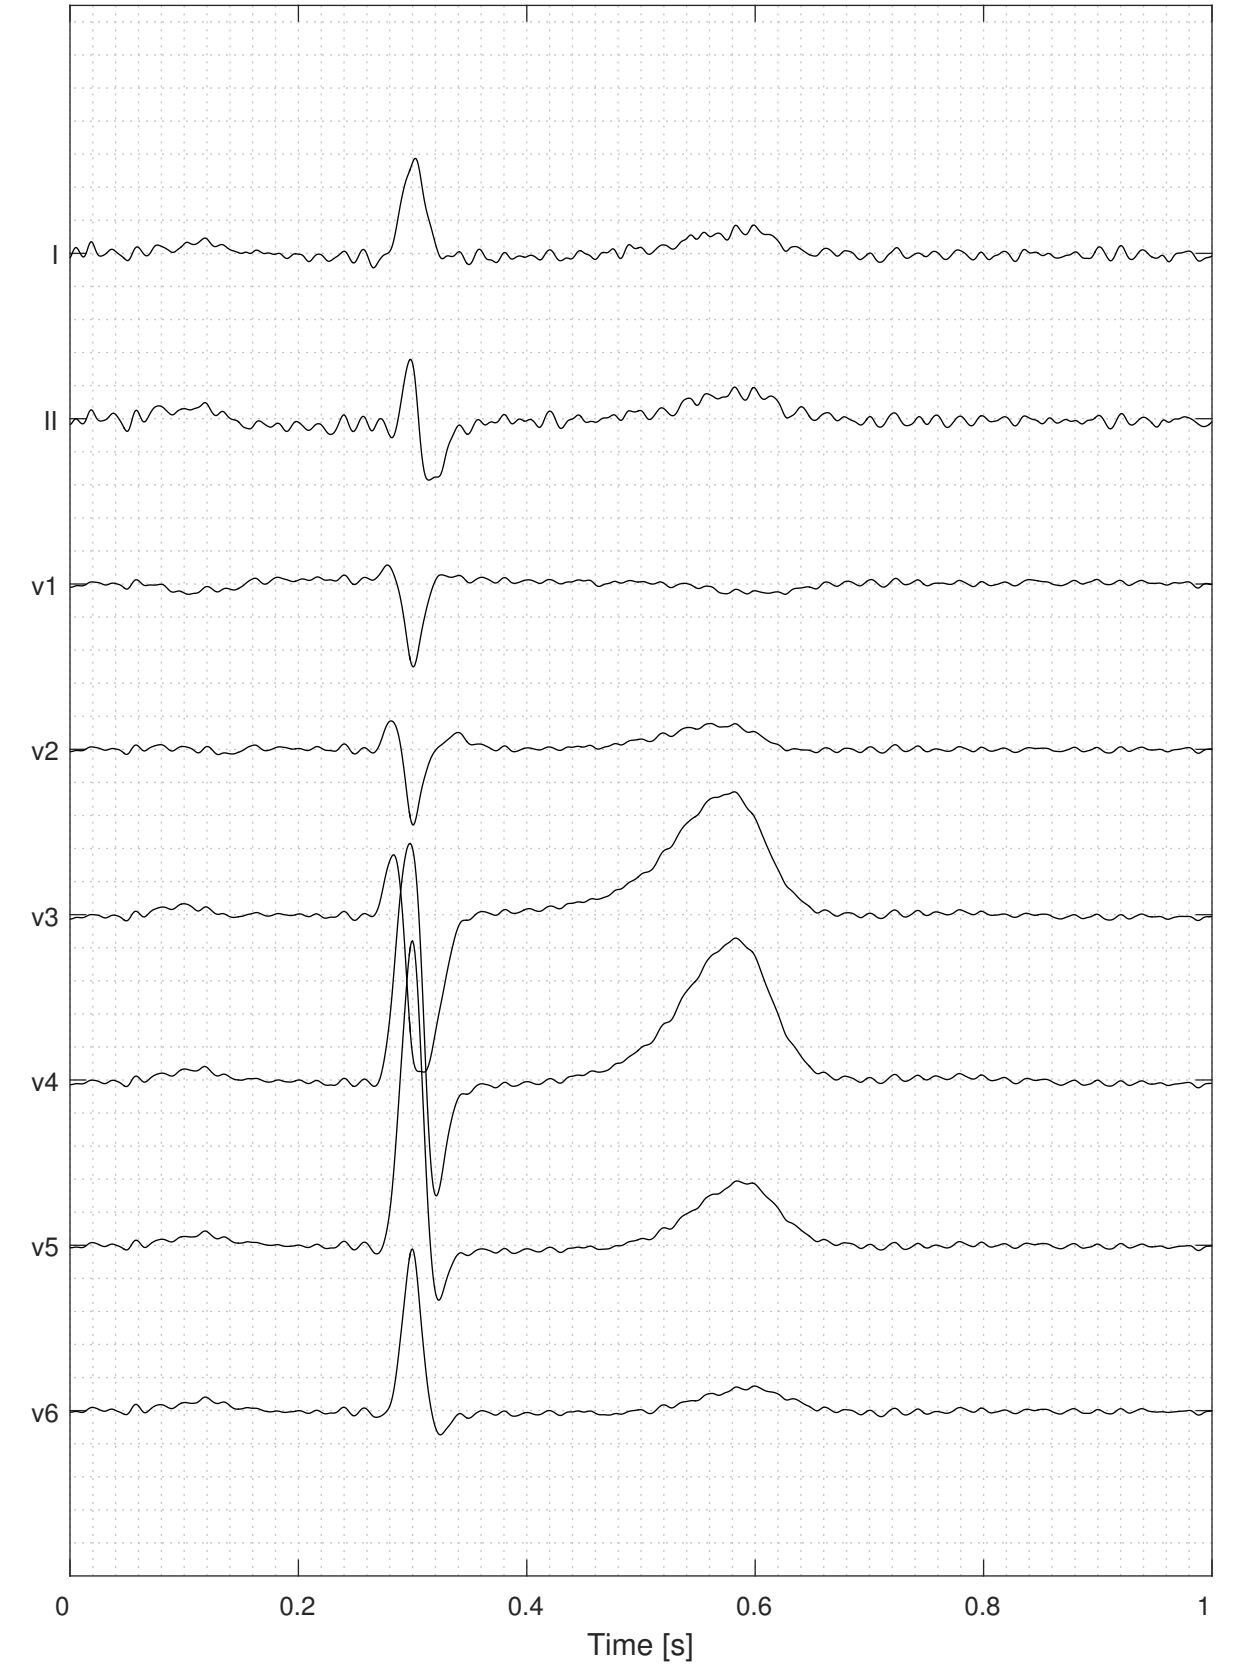

Supplement: pone.0184352.s003.pdf [file pone.0184352.s003.pdf]
